# Supplementary material for: New Ruthenium Nitrosyl Complexes Combining Potentially Photoactive Nitrosyl Group with the Magnetic Nitroxide Radicals as Ligands
Source: MDPI journal article supplement (doi:10.3390/ijms241713371), 2023-08-29
Supplement: s1 [file s1]

**«NEW RUTHENIUM NITROSYL COMPLEXES COMBINING POTENTIALLY PHOTOACTIVE NITROSYL GROUP WITH THE MAGNETIC NITROXIDE RADICALS AS LIGANDS.»**

**Gennadiy Kostin<sup>1\*</sup>, Ruslan Kozlov<sup>2</sup>, Artem Bogomyakov<sup>3</sup>, Svyatoslav Tolstikov<sup>3</sup>, Dmitriy Sheven<sup>1</sup>, Sergey Korenev<sup>1</sup>**

**1. ESI – MS data for the acetonitrile solutions of Na[RuNOCl<sub>4</sub>L]**

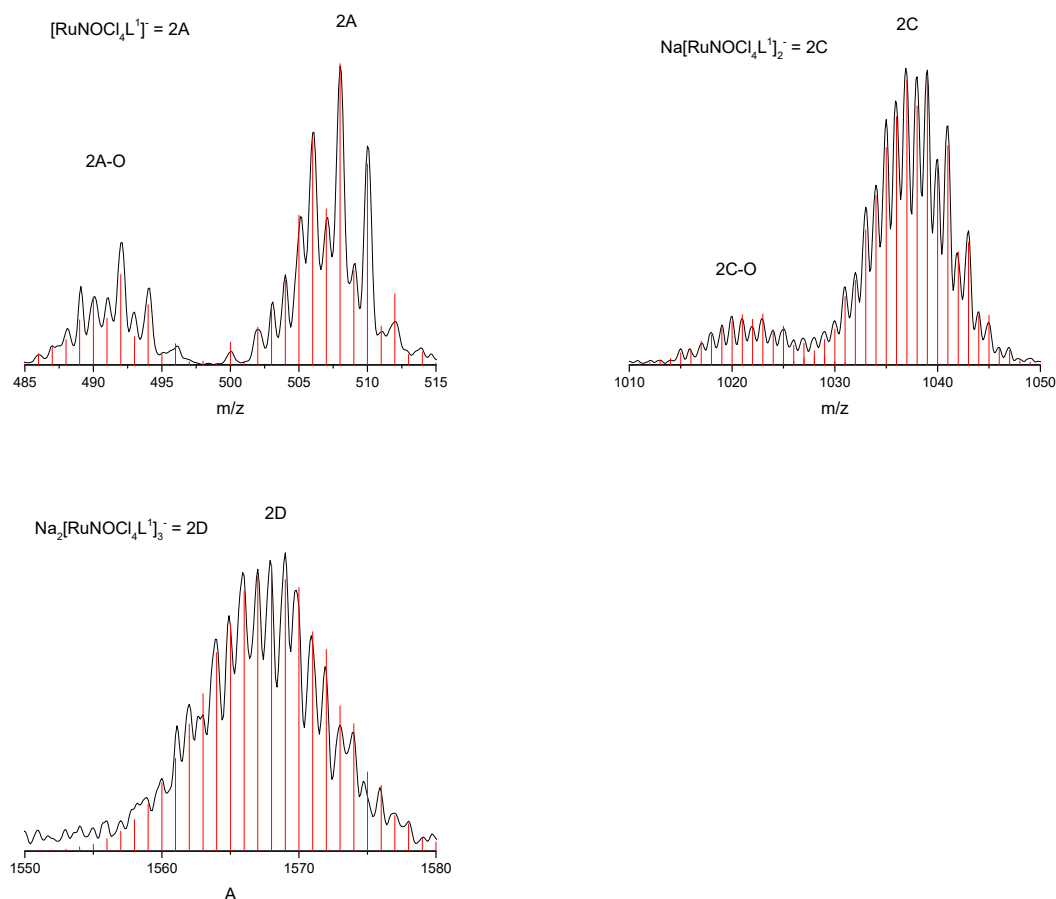

Fig. S1.a. Fragments of negative ions mass spectrum of Na[RuNOCl<sub>4</sub>L<sup>1</sup>] corresponding to main forms – experimental (lines) and theoretical isotopic distribution pattern.

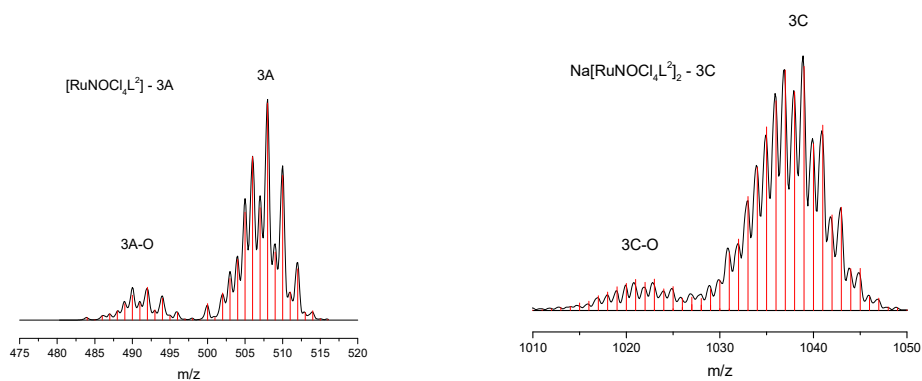

Fig. S1.b. Fragments of negative ions mass spectrum of Na[RuNOCl<sub>4</sub>L<sup>2</sup>] corresponding to main forms – experimental (lines) and theoretical isotopic distribution pattern.

2. The pictures of complex crystal structure with distances between paramagnetic centers.

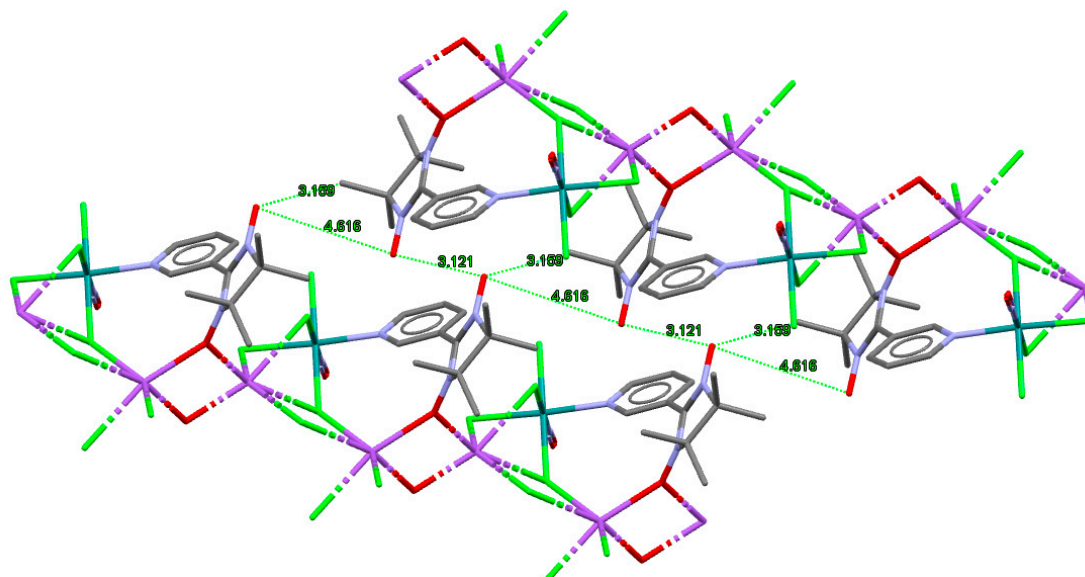

Fig. S.2.a. The crystal structure of Na[RuNOCl<sub>4</sub>L<sup>1</sup>]

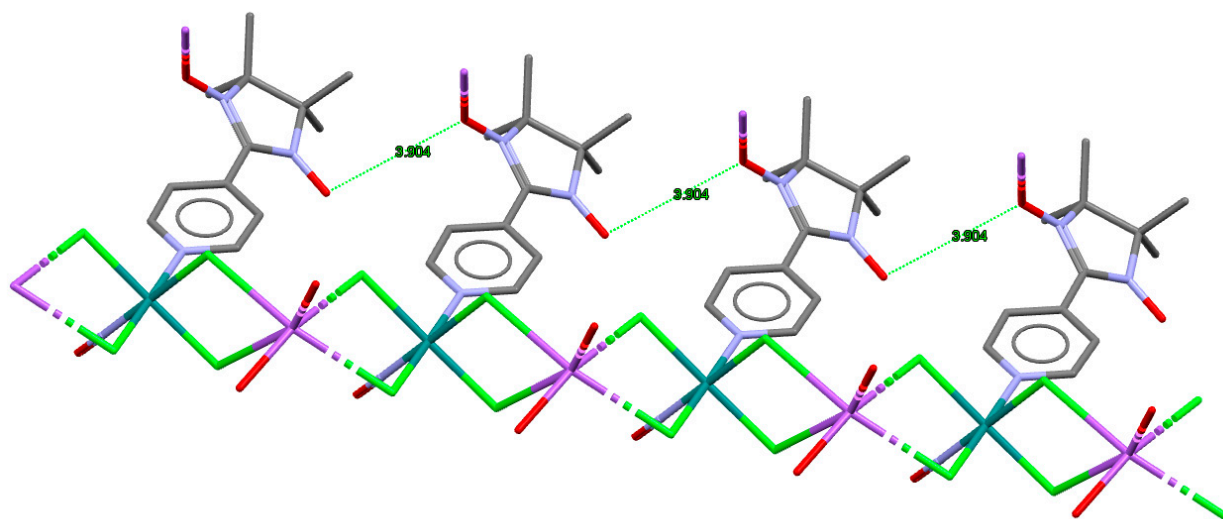

Fig. S.2.b. The crystal structure of Na[RuNOCl<sub>4</sub>L<sup>2</sup>]

### 3. Hirshfeld surfaces analysis for complexes (2) and (3)

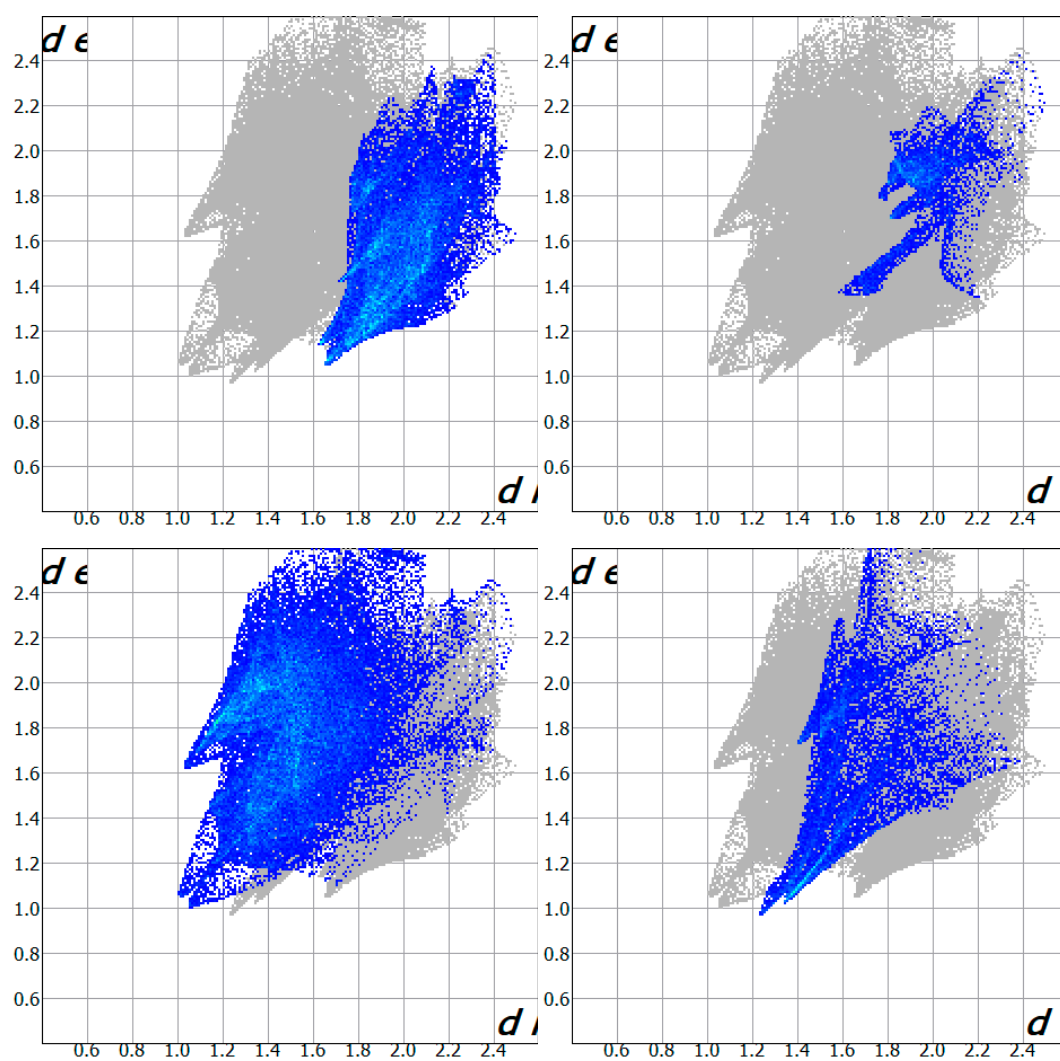

Figure S3.a. The 2D fingerprints patterns for the Hirshfeld surfaces (2) chlorine (upper left), carbon (upper right), hydrogen (low left) and oxygen (low right)

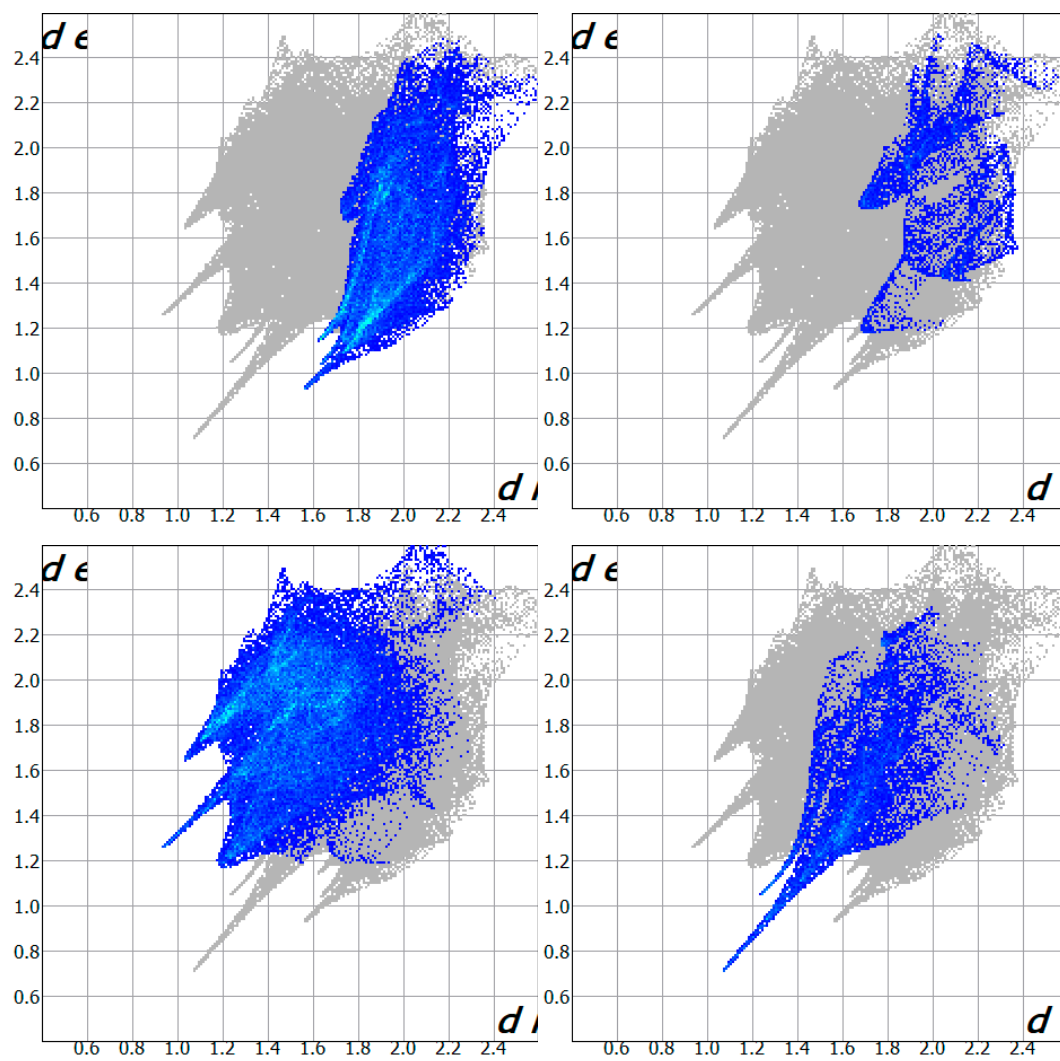

Figure S3.b. The 2D fingerprints patterns for the Hirshfeld surfaces **(3)** chlorine (upper left), carbon (upper right), hydrogen (low left) and oxygen (low right)
