# Supplementary material for: New Ruthenium Nitrosyl Complexes Combining Potentially Photoactive Nitrosyl Group with the Magnetic Nitroxide Radicals as Ligands
Source: Int J Mol Sci. 2023 Aug 29;24(17):13371. doi: 10.3390/ijms241713371 (PMC10488014; doi:10.3390/ijms241713371)
Supplement: Supplementary file 1 [file ijms-24-13371-s001.zip]

Archive with 5 entries (5 files):
- 1.cif
- 2.cif
- checkcif1.pdf
- checkcif2.pdf
- SI.pdf
