# Supplementary material for: New Ruthenium Nitrosyl Complexes Combining Potentially Photoactive Nitrosyl Group with the Magnetic Nitroxide Radicals as Ligands
Source: Int J Mol Sci. 2023 Aug 29;24(17):13371. doi: 10.3390/ijms241713371 (PMC10488014; doi:10.3390/ijms241713371)
Supplement: Supplementary file 1 [file ijms-24-13371-s001.zip › 1.cif]

data_kru519
_audit_creation_date               2023-06-09
_audit_creation_method
;
Olex2 1.2
(compiled 2018.05.29 svn.r3508 for OlexSys, GUI svn.r5506)
;
_shelx_SHELXL_version_number       '2016/6'
_audit_contact_author_address      ?
_audit_contact_author_email        ?
_audit_contact_author_name         ''
_audit_contact_author_phone        ?
_publ_contact_author_id_orcid      ?
_publ_section_references
;
Dolomanov, O.V., Bourhis, L.J., Gildea, R.J, Howard, J.A.K. & Puschmann, H.
 (2009), J. Appl. Cryst. 42, 339-341.

Sheldrick, G.M. (2015). Acta Cryst. A71, 3-8.

Sheldrick, G.M. (2015). Acta Cryst. C71, 3-8.
;
_chemical_name_common              ?
_chemical_name_systematic          ?
_chemical_formula_moiety           'C28 H38 Cl8 N10 Na2 O6 Ru2'
_chemical_formula_sum              'C28 H38 Cl8 N10 Na2 O6 Ru2'
_chemical_formula_weight           1142.40
_chemical_melting_point            ?
loop_
  _atom_type_symbol
  _atom_type_description
  _atom_type_scat_dispersion_real
  _atom_type_scat_dispersion_imag
  _atom_type_scat_source
 'C' 'C' 0.0033 0.0016 'International Tables Vol C Tables 4.2.6.8 and 6.1.1.4'
 'H' 'H' 0.0000 0.0000 'International Tables Vol C Tables 4.2.6.8 and 6.1.1.4'
 'Cl' 'Cl' 0.1484 0.1585 'International Tables Vol C Tables 4.2.6.8 and 6.1.1.4'
 'N' 'N' 0.0061 0.0033 'International Tables Vol C Tables 4.2.6.8 and 6.1.1.4'
 'Na' 'Na' 0.0362 0.0249 'International Tables Vol C Tables 4.2.6.8 and 6.1.1.4'
 'O' 'O' 0.0106 0.0060 'International Tables Vol C Tables 4.2.6.8 and 6.1.1.4'
 'Ru' 'Ru' -1.2594 0.8363
 'International Tables Vol C Tables 4.2.6.8 and 6.1.1.4'

_shelx_space_group_comment
;
The symmetry employed for this shelxl refinement is uniquely defined
by the following loop, which should always be used as a source of
symmetry information in preference to the above space-group names.
They are only intended as comments.
;
_space_group_crystal_system        'triclinic'
_space_group_IT_number             2
_space_group_name_H-M_alt          'P -1'
_space_group_name_Hall             '-P 1'
loop_
  _space_group_symop_operation_xyz
 'x, y, z'
 '-x, -y, -z'

_cell_length_a                     10.4158(2)
_cell_length_b                     10.8548(2)
_cell_length_c                     20.9285(4)
_cell_angle_alpha                  99.8310(10)
_cell_angle_beta                   94.4770(10)
_cell_angle_gamma                  109.0360(10)
_cell_volume                       2181.12(7)
_cell_formula_units_Z              2
_cell_measurement_reflns_used      9938
_cell_measurement_temperature      173.15
_cell_measurement_theta_max        33.18
_cell_measurement_theta_min        2.18
_shelx_estimated_absorpt_T_max     0.963
_shelx_estimated_absorpt_T_min     0.788
_exptl_absorpt_coefficient_mu      1.254
_exptl_absorpt_correction_T_max    0.7465
_exptl_absorpt_correction_T_min    0.6476
_exptl_absorpt_correction_type     multi-scan
_exptl_absorpt_process_details
;
SADABS-2016/2 (Bruker,2016/2) was used for absorption correction.
wR2(int) was 0.0857 before and 0.0493 after correction.
The Ratio of minimum to maximum transmission is 0.8675.
The \l/2 correction factor is Not present.
;
_exptl_absorpt_special_details     ?
_exptl_crystal_colour              violet
_exptl_crystal_colour_primary      violet
_exptl_crystal_density_diffrn      1.739
_exptl_crystal_density_meas        ?
_exptl_crystal_density_method      ?
_exptl_crystal_description         plate
_exptl_crystal_F_000               1140
_exptl_crystal_size_max            0.2
_exptl_crystal_size_mid            0.07
_exptl_crystal_size_min            0.03
_exptl_transmission_factor_max     ?
_exptl_transmission_factor_min     ?
_diffrn_reflns_av_R_equivalents    0.0452
_diffrn_reflns_av_unetI/netI       0.0718
_diffrn_reflns_Laue_measured_fraction_full  0.999
_diffrn_reflns_Laue_measured_fraction_max  0.972
_diffrn_reflns_limit_h_max         16
_diffrn_reflns_limit_h_min         -16
_diffrn_reflns_limit_k_max         16
_diffrn_reflns_limit_k_min         -16
_diffrn_reflns_limit_l_max         29
_diffrn_reflns_limit_l_min         -32
_diffrn_reflns_number              43674
_diffrn_reflns_point_group_measured_fraction_full  0.999
_diffrn_reflns_point_group_measured_fraction_max  0.972
_diffrn_reflns_theta_full          25.242
_diffrn_reflns_theta_max           33.251
_diffrn_reflns_theta_min           2.357
_diffrn_ambient_temperature        173.15
_diffrn_detector_area_resol_mean   ?
_diffrn_measured_fraction_theta_full  0.999
_diffrn_measured_fraction_theta_max  0.972
_diffrn_measurement_device_type    'Bruker APEX-II CCD'
_diffrn_measurement_method         '\f and \w scans'
_diffrn_radiation_type             MoK\a
_diffrn_radiation_wavelength       0.71073
_diffrn_source                     ?
_diffrn_special_details            ?
_diffrn_standards_number           0
_reflns_Friedel_coverage           0.000
_reflns_Friedel_fraction_full      .
_reflns_Friedel_fraction_max       .
_reflns_number_gt                  11225
_reflns_number_total               16301
_reflns_special_details
;
 Reflections were merged by SHELXL according to the crystal
 class for the calculation of statistics and refinement.
 
 _reflns_Friedel_fraction is defined as the number of unique
 Friedel pairs measured divided by the number that would be
 possible theoretically, ignoring centric projections and
 systematic absences.
;
_reflns_threshold_expression       'I > 2\s(I)'
_computing_cell_refinement         ?
_computing_data_collection         ?
_computing_data_reduction          ?
_computing_molecular_graphics      'Olex2 (Dolomanov et al., 2009)'
_computing_publication_material    'Olex2 (Dolomanov et al., 2009)'
_computing_structure_refinement    'ShelXL (Sheldrick, 2015)'
_computing_structure_solution      'ShelXT (Sheldrick, 2015)'
_refine_diff_density_max           1.681
_refine_diff_density_min           -1.123
_refine_diff_density_rms           0.131
_refine_ls_extinction_coef         .
_refine_ls_extinction_method       none
_refine_ls_goodness_of_fit_ref     0.861
_refine_ls_hydrogen_treatment      constr
_refine_ls_matrix_type             full
_refine_ls_number_parameters       515
_refine_ls_number_reflns           16301
_refine_ls_number_restraints       0
_refine_ls_R_factor_all            0.0835
_refine_ls_R_factor_gt             0.0460
_refine_ls_restrained_S_all        0.861
_refine_ls_shift/su_max            0.001
_refine_ls_shift/su_mean           0.000
_refine_ls_structure_factor_coef   Fsqd
_refine_ls_weighting_details      
 'w=1/[\s^2^(Fo^2^)+(0.1000P)^2^] where P=(Fo^2^+2Fc^2^)/3'
_refine_ls_weighting_scheme        calc
_refine_ls_wR_factor_gt            0.1217
_refine_ls_wR_factor_ref           0.1466
_refine_special_details            ?
_olex2_refinement_description
;
1. Fixed Uiso
 At 1.2 times of:
  All C(H) groups
 At 1.5 times of:
  All C(H,H,H) groups
2. Uiso/Uaniso restraints and constraints
Uanis(N1A) = Uanis(C2A)
3. Others
 Fixed Sof: Na2(0.5)
4.a Aromatic/amide H refined with riding coordinates:
 C12(H12), C16(H16), C33(H33), C29(H29), C14(H14), C30(H30), C15(H15), C31(H31)
4.b Idealised Me refined as rotating group:
 C27(H27A,H27B,H27C), C25(H25A,H25B,H25C), C42(H42A,H42B,H42C), C41(H41A,H41B,
 H41C), C24(H24A,H24B,H24C), C40(H40A,H40B,H40C), C39(H39A,H39B,H39C), C26(H26A,
 H26B,H26C), C6A(H6AA,H6AB,H6AC), C3A(H3AA,H3AB,H3AC)
;
_atom_sites_solution_hydrogens     geom
_atom_sites_solution_primary       dual
_atom_sites_solution_secondary     ?
loop_
  _atom_site_label
  _atom_site_type_symbol
  _atom_site_fract_x
  _atom_site_fract_y
  _atom_site_fract_z
  _atom_site_U_iso_or_equiv
  _atom_site_adp_type
  _atom_site_occupancy
  _atom_site_site_symmetry_order
  _atom_site_calc_flag
  _atom_site_refinement_flags_posn
  _atom_site_refinement_flags_adp
  _atom_site_refinement_flags_occupancy
  _atom_site_disorder_assembly
  _atom_site_disorder_group
 Ru1 Ru 0.36917(2) 0.37134(2) 0.12812(2) 0.01628(6) Uani 1 1 d . . . . .
 Ru2 Ru 0.60960(2) 0.11580(2) 0.38771(2) 0.01747(6) Uani 1 1 d . . . . .
 Cl5 Cl 0.65800(8) 0.26612(8) 0.49023(4) 0.02676(16) Uani 1 1 d . . . . .
 Cl4 Cl 0.33953(9) 0.24500(8) 0.01971(4) 0.02790(17) Uani 1 1 d . . . . .
 Cl3 Cl 0.30750(8) 0.52953(7) 0.08160(4) 0.02337(15) Uani 1 1 d . . . . .
 Cl2 Cl 0.60261(7) 0.48550(8) 0.11891(4) 0.02550(16) Uani 1 1 d . . . . .
 Na1 Na 0.45802(14) 0.35561(12) 0.43750(6) 0.0265(3) Uani 1 1 d . . . . .
 Cl8 Cl 0.84556(8) 0.18996(9) 0.37720(4) 0.03128(18) Uani 1 1 d . . . . .
 Cl7 Cl 0.58837(8) 0.28331(7) 0.33274(4) 0.02380(15) Uani 1 1 d . . . . .
 Cl6 Cl 0.37164(8) 0.05826(7) 0.39621(4) 0.02466(15) Uani 1 1 d . . . . .
 Cl1 Cl 0.13394(8) 0.26945(8) 0.13674(4) 0.02737(16) Uani 1 1 d . . . . .
 Na3 Na 0.500000 0.500000 0.000000 0.0316(4) Uani 1 2 d S T P . .
 N11 N 0.3990(2) 0.4964(2) 0.22109(12) 0.0175(5) Uani 1 1 d . . . . .
 N28 N 0.5664(2) -0.0134(2) 0.29462(12) 0.0179(5) Uani 1 1 d . . . . .
 C12 C 0.5170(3) 0.5265(3) 0.26113(14) 0.0177(5) Uani 1 1 d . . . . .
 H12 H 0.585621 0.493535 0.245947 0.021 Uiso 1 1 calc R . . . .
 C17 C 0.6763(3) 0.6367(3) 0.36264(14) 0.0183(5) Uani 1 1 d . . . . .
 C13 C 0.5423(3) 0.6038(3) 0.32371(14) 0.0190(5) Uani 1 1 d . . . . .
 N1N N 0.4012(3) 0.2452(3) 0.16016(13) 0.0274(6) Uani 1 1 d . . . . .
 O2N O 0.6356(3) -0.0904(3) 0.45105(13) 0.0443(7) Uani 1 1 d . . . . .
 N2N N 0.6261(3) -0.0096(3) 0.42696(13) 0.0255(6) Uani 1 1 d . . . . .
 C16 C 0.3041(3) 0.5467(3) 0.24205(14) 0.0210(6) Uani 1 1 d . . . . .
 H16 H 0.222046 0.528916 0.213271 0.025 Uiso 1 1 calc R . . . .
 O1N O 0.4094(4) 0.1568(3) 0.17913(15) 0.0575(9) Uani 1 1 d . . . . .
 O22 O 0.6063(2) 0.5863(2) 0.46106(10) 0.0199(4) Uani 1 1 d . . . . .
 N18 N 0.7009(2) 0.6293(2) 0.42538(11) 0.0163(4) Uani 1 1 d . . . . .
 C19 C 0.8513(3) 0.6824(3) 0.45181(14) 0.0181(5) Uani 1 1 d . . . . .
 N21 N 0.7973(3) 0.6792(3) 0.33932(13) 0.0240(5) Uani 1 1 d . . . . .
 C32 C 0.4198(3) -0.1196(3) 0.19276(13) 0.0156(5) Uani 1 1 d . . . . .
 C27 C 0.8843(3) 0.5886(3) 0.49136(16) 0.0257(6) Uani 1 1 d . . . . .
 H27A H 0.983882 0.617058 0.503860 0.039 Uiso 1 1 calc GR . . . .
 H27B H 0.850528 0.497824 0.464816 0.039 Uiso 1 1 calc GR . . . .
 H27C H 0.839833 0.590583 0.530907 0.039 Uiso 1 1 calc GR . . . .
 C33 C 0.5184(3) -0.1715(3) 0.16995(15) 0.0240(6) Uani 1 1 d . . . . .
 H33 H 0.504380 -0.221207 0.126422 0.029 Uiso 1 1 calc R . . . .
 O23 O 0.8097(3) 0.6998(3) 0.28167(12) 0.0428(7) Uani 1 1 d . . . . .
 C29 C 0.4490(3) -0.0402(3) 0.25541(13) 0.0168(5) Uani 1 1 d . . . . .
 H29 H 0.383068 -0.003734 0.270880 0.020 Uiso 1 1 calc R . . . .
 C20 C 0.9162(3) 0.6860(3) 0.38625(15) 0.0225(6) Uani 1 1 d . . . . .
 C34 C 0.2874(3) -0.1528(3) 0.15324(13) 0.0160(5) Uani 1 1 d . . . . .
 C14 C 0.4410(3) 0.6500(3) 0.34653(15) 0.0223(6) Uani 1 1 d . . . . .
 H14 H 0.453118 0.698601 0.390166 0.027 Uiso 1 1 calc R . . . .
 C30 C 0.6583(3) -0.0689(3) 0.27379(15) 0.0226(6) Uani 1 1 d . . . . .
 H30 H 0.740316 -0.052838 0.302255 0.027 Uiso 1 1 calc R . . . .
 C15 C 0.3220(3) 0.6232(3) 0.30398(15) 0.0250(6) Uani 1 1 d . . . . .
 H15 H 0.253143 0.657521 0.317420 0.030 Uiso 1 1 calc R . . . .
 C31 C 0.6362(3) -0.1488(3) 0.21201(16) 0.0269(7) Uani 1 1 d . . . . .
 H31 H 0.701806 -0.187743 0.198651 0.032 Uiso 1 1 calc R . . . .
 C25 C 0.9532(4) 0.5629(4) 0.36092(18) 0.0347(8) Uani 1 1 d . . . . .
 H25A H 0.875058 0.482335 0.360526 0.052 Uiso 1 1 calc GR . . . .
 H25B H 1.032641 0.563890 0.389659 0.052 Uiso 1 1 calc GR . . . .
 H25C H 0.975747 0.563769 0.316364 0.052 Uiso 1 1 calc GR . . . .
 N36 N 0.2652(2) -0.1660(2) 0.08806(12) 0.0194(5) Uani 1 1 d . . . . .
 O43 O 0.3597(2) -0.1424(3) 0.05110(11) 0.0371(6) Uani 1 1 d . . . . .
 N35 N 0.1675(3) -0.1824(3) 0.17639(12) 0.0214(5) Uani 1 1 d . . . . .
 O44 O 0.1519(2) -0.1825(3) 0.23659(11) 0.0371(6) Uani 1 1 d . . . . .
 C38 C 0.1167(3) -0.2031(3) 0.06129(15) 0.0201(6) Uani 1 1 d . . . . .
 C42 C 0.0808(3) -0.3179(3) 0.00293(15) 0.0248(6) Uani 1 1 d . . . . .
 H42A H 0.134426 -0.289098 -0.031662 0.037 Uiso 1 1 calc GR . . . .
 H42B H -0.017299 -0.346677 -0.013583 0.037 Uiso 1 1 calc GR . . . .
 H42C H 0.101944 -0.392213 0.016233 0.037 Uiso 1 1 calc GR . . . .
 C37 C 0.0464(3) -0.2363(3) 0.12305(15) 0.0229(6) Uani 1 1 d . . . . .
 Na2 Na 0.4770(4) 0.0357(3) 0.00313(16) 0.0413(8) Uani 0.5 1 d . . . . .
 C41 C 0.0998(4) -0.0815(3) 0.03872(19) 0.0394(9) Uani 1 1 d . . . . .
 H41A H 0.124023 -0.006714 0.076360 0.059 Uiso 1 1 calc GR . . . .
 H41B H 0.004210 -0.103149 0.019468 0.059 Uiso 1 1 calc GR . . . .
 H41C H 0.160180 -0.056921 0.005874 0.059 Uiso 1 1 calc GR . . . .
 C24 C 1.0381(3) 0.8105(4) 0.38727(18) 0.0366(8) Uani 1 1 d . . . . .
 H24A H 1.072894 0.803025 0.345137 0.055 Uiso 1 1 calc GR . . . .
 H24B H 1.110593 0.820307 0.422520 0.055 Uiso 1 1 calc GR . . . .
 H24C H 1.009300 0.888610 0.394796 0.055 Uiso 1 1 calc GR . . . .
 C40 C -0.0160(4) -0.3857(3) 0.12208(17) 0.0355(8) Uani 1 1 d . . . . .
 H40A H 0.052907 -0.427704 0.113659 0.053 Uiso 1 1 calc GR . . . .
 H40B H -0.095164 -0.426682 0.087435 0.053 Uiso 1 1 calc GR . . . .
 H40C H -0.045728 -0.398206 0.164544 0.053 Uiso 1 1 calc GR . . . .
 C39 C -0.0575(4) -0.1698(4) 0.13998(19) 0.0445(10) Uani 1 1 d . . . . .
 H39A H -0.087865 -0.188415 0.181589 0.067 Uiso 1 1 calc GR . . . .
 H39B H -0.136634 -0.204659 0.105238 0.067 Uiso 1 1 calc GR . . . .
 H39C H -0.015130 -0.073343 0.144073 0.067 Uiso 1 1 calc GR . . . .
 C26 C 0.8822(3) 0.8191(3) 0.49522(16) 0.0264(7) Uani 1 1 d . . . . .
 H26A H 0.864249 0.879529 0.468719 0.040 Uiso 1 1 calc GR . . . .
 H26B H 0.978708 0.854420 0.515141 0.040 Uiso 1 1 calc GR . . . .
 H26C H 0.823429 0.811481 0.529769 0.040 Uiso 1 1 calc GR . . . .
 N4A N 0.2599(4) 0.3275(3) 0.35799(17) 0.0438(8) Uani 1 1 d . . . . .
 C5A C 0.1869(4) 0.2329(4) 0.32374(18) 0.0327(8) Uani 1 1 d . . . . .
 C6A C 0.0952(4) 0.1128(4) 0.28078(19) 0.0413(9) Uani 1 1 d . . . . .
 H6AA H 0.131730 0.040539 0.281801 0.062 Uiso 1 1 calc GR . . . .
 H6AB H 0.086729 0.127608 0.235975 0.062 Uiso 1 1 calc GR . . . .
 H6AC H 0.004716 0.088617 0.295327 0.062 Uiso 1 1 calc GR . . . .
 C3A C 0.8146(4) 0.2904(4) 0.1995(2) 0.0496(11) Uani 1 1 d . . . A 2
 H3AA H 0.910531 0.309998 0.192449 0.074 Uiso 1 1 calc GR . . A 2
 H3AB H 0.801534 0.258161 0.240289 0.074 Uiso 1 1 calc GR . . A 2
 H3AC H 0.791486 0.371585 0.202376 0.074 Uiso 1 1 calc GR . . A 2
 C2A C 0.7261(6) 0.1890(6) 0.1451(2) 0.0763(12) Uani 1 1 d . . . . .
 N1A N 0.6566(5) 0.1137(4) 0.10262(18) 0.0763(12) Uani 1 1 d . . . . .

loop_
  _atom_site_aniso_label
  _atom_site_aniso_U_11
  _atom_site_aniso_U_22
  _atom_site_aniso_U_33
  _atom_site_aniso_U_23
  _atom_site_aniso_U_13
  _atom_site_aniso_U_12
 Ru1 0.01554(11) 0.01754(11) 0.01517(11) 0.00476(8) 0.00007(8) 0.00476(8)
 Ru2 0.01642(11) 0.01971(12) 0.01475(11) 0.00167(8) -0.00122(8) 0.00594(9)
 Cl5 0.0301(4) 0.0250(4) 0.0197(3) -0.0009(3) -0.0005(3) 0.0060(3)
 Cl4 0.0327(4) 0.0254(4) 0.0192(3) -0.0002(3) 0.0014(3) 0.0045(3)
 Cl3 0.0249(4) 0.0231(3) 0.0236(4) 0.0089(3) -0.0011(3) 0.0093(3)
 Cl2 0.0171(3) 0.0362(4) 0.0208(3) 0.0069(3) 0.0037(3) 0.0053(3)
 Na1 0.0270(7) 0.0262(6) 0.0235(6) 0.0026(5) 0.0072(5) 0.0060(5)
 Cl8 0.0148(3) 0.0401(4) 0.0297(4) -0.0040(3) -0.0025(3) 0.0043(3)
 Cl7 0.0278(4) 0.0225(3) 0.0215(3) 0.0062(3) 0.0049(3) 0.0081(3)
 Cl6 0.0210(3) 0.0285(4) 0.0225(4) 0.0039(3) 0.0048(3) 0.0063(3)
 Cl1 0.0181(3) 0.0314(4) 0.0273(4) 0.0069(3) 0.0017(3) 0.0014(3)
 Na3 0.0322(11) 0.0397(11) 0.0188(9) 0.0107(8) 0.0045(8) 0.0045(8)
 N11 0.0144(11) 0.0211(12) 0.0165(11) 0.0048(9) 0.0015(9) 0.0053(9)
 N28 0.0159(11) 0.0206(11) 0.0168(11) 0.0042(9) -0.0003(9) 0.0064(9)
 C12 0.0168(13) 0.0209(13) 0.0166(13) 0.0063(10) 0.0035(10) 0.0066(10)
 C17 0.0143(12) 0.0228(14) 0.0145(12) 0.0026(10) -0.0003(10) 0.0035(10)
 C13 0.0144(12) 0.0255(14) 0.0169(13) 0.0066(11) 0.0013(10) 0.0056(11)
 N1N 0.0312(15) 0.0258(14) 0.0214(13) 0.0046(11) -0.0027(11) 0.0064(11)
 O2N 0.0582(19) 0.0491(17) 0.0335(15) 0.0096(12) -0.0033(13) 0.0309(15)
 N2N 0.0324(15) 0.0219(13) 0.0170(12) 0.0011(10) 0.0009(11) 0.0044(11)
 C16 0.0145(13) 0.0294(15) 0.0185(14) 0.0050(12) -0.0001(11) 0.0072(11)
 O1N 0.086(3) 0.0345(15) 0.0517(19) 0.0107(14) -0.0195(17) 0.0265(16)
 O22 0.0169(10) 0.0259(11) 0.0141(9) 0.0037(8) 0.0040(8) 0.0037(8)
 N18 0.0123(10) 0.0189(11) 0.0147(11) 0.0022(9) 0.0010(8) 0.0025(8)
 C19 0.0130(12) 0.0185(13) 0.0204(13) 0.0034(11) -0.0025(10) 0.0036(10)
 N21 0.0161(12) 0.0345(14) 0.0203(13) 0.0110(11) 0.0036(10) 0.0046(10)
 C32 0.0141(12) 0.0149(12) 0.0165(12) 0.0019(10) 0.0010(10) 0.0043(10)
 C27 0.0222(15) 0.0291(16) 0.0273(16) 0.0109(13) -0.0024(12) 0.0097(12)
 C33 0.0183(14) 0.0263(15) 0.0218(15) -0.0042(12) 0.0014(11) 0.0052(12)
 O23 0.0254(13) 0.080(2) 0.0221(12) 0.0272(13) 0.0052(10) 0.0090(13)
 C29 0.0170(13) 0.0207(13) 0.0140(12) 0.0037(10) 0.0013(10) 0.0085(10)
 C20 0.0121(12) 0.0308(16) 0.0197(14) 0.0029(12) -0.0011(11) 0.0029(11)
 C34 0.0128(12) 0.0158(12) 0.0163(12) 0.0001(10) -0.0003(10) 0.0031(10)
 C14 0.0201(14) 0.0291(15) 0.0165(13) 0.0022(11) 0.0019(11) 0.0083(12)
 C30 0.0164(13) 0.0261(15) 0.0231(15) -0.0003(12) -0.0037(11) 0.0084(11)
 C15 0.0174(14) 0.0375(17) 0.0230(15) 0.0034(13) 0.0036(12) 0.0147(13)
 C31 0.0181(14) 0.0319(16) 0.0295(17) -0.0039(13) 0.0005(12) 0.0128(12)
 C25 0.0263(17) 0.045(2) 0.0335(19) -0.0006(16) 0.0073(15) 0.0175(15)
 N36 0.0152(11) 0.0235(12) 0.0162(11) 0.0037(9) -0.0003(9) 0.0031(9)
 O43 0.0222(12) 0.0596(17) 0.0203(12) 0.0106(11) 0.0071(10) -0.0002(11)
 N35 0.0144(11) 0.0299(13) 0.0176(12) 0.0028(10) 0.0005(9) 0.0060(10)
 O44 0.0211(12) 0.0692(18) 0.0171(11) 0.0062(11) 0.0058(9) 0.0108(12)
 C38 0.0176(13) 0.0180(13) 0.0206(14) 0.0012(11) -0.0040(11) 0.0035(10)
 C42 0.0286(16) 0.0202(14) 0.0185(14) -0.0011(11) -0.0042(12) 0.0032(12)
 C37 0.0161(13) 0.0298(16) 0.0187(14) -0.0003(12) 0.0010(11) 0.0055(11)
 Na2 0.037(2) 0.046(2) 0.0252(14) 0.0084(15) 0.0073(13) -0.0069(14)
 C41 0.048(2) 0.0242(17) 0.046(2) 0.0060(16) -0.0092(18) 0.0169(16)
 C24 0.0226(17) 0.043(2) 0.0313(18) 0.0081(16) 0.0034(14) -0.0054(15)
 C40 0.0269(18) 0.0385(19) 0.0307(18) 0.0063(15) 0.0104(15) -0.0036(14)
 C39 0.0267(18) 0.075(3) 0.033(2) -0.0087(19) -0.0065(15) 0.0323(19)
 C26 0.0219(15) 0.0224(15) 0.0292(17) -0.0012(12) 0.0015(13) 0.0040(12)
 N4A 0.040(2) 0.049(2) 0.043(2) 0.0097(16) 0.0018(16) 0.0166(16)
 C5A 0.0331(19) 0.044(2) 0.0283(18) 0.0118(16) 0.0068(15) 0.0203(16)
 C6A 0.045(2) 0.038(2) 0.037(2) 0.0027(17) 0.0062(18) 0.0122(17)
 C3A 0.032(2) 0.064(3) 0.043(2) 0.002(2) 0.0105(18) 0.008(2)
 C2A 0.063(2) 0.095(3) 0.0331(16) 0.0197(17) 0.0008(14) -0.0249(18)
 N1A 0.063(2) 0.095(3) 0.0331(16) 0.0197(17) 0.0008(14) -0.0249(18)

_geom_special_details
;
 All esds (except the esd in the dihedral angle between two l.s. planes)
 are estimated using the full covariance matrix.  The cell esds are taken
 into account individually in the estimation of esds in distances, angles
 and torsion angles; correlations between esds in cell parameters are only
 used when they are defined by crystal symmetry.  An approximate (isotropic)
 treatment of cell esds is used for estimating esds involving l.s. planes.
;
loop_
  _geom_bond_atom_site_label_1
  _geom_bond_atom_site_label_2
  _geom_bond_distance
  _geom_bond_site_symmetry_2
  _geom_bond_publ_flag
 Ru1 Cl4 2.3824(8) . ?
 Ru1 Cl3 2.3456(7) . ?
 Ru1 Cl2 2.3820(8) . ?
 Ru1 Cl1 2.3725(8) . ?
 Ru1 Na3 3.4065(2) . ?
 Ru1 N11 2.111(2) . ?
 Ru1 N1N 1.736(3) . ?
 Ru2 Cl5 2.3704(8) . ?
 Ru2 Na1 3.5166(13) . ?
 Ru2 Cl8 2.3645(8) . ?
 Ru2 Cl7 2.3698(8) . ?
 Ru2 Cl6 2.3795(8) . ?
 Ru2 N28 2.118(2) . ?
 Ru2 N2N 1.752(3) . ?
 Cl5 Na1 2.7977(16) . ?
 Cl4 Na3 2.8469(8) . ?
 Cl4 Na2 3.044(3) . ?
 Cl3 Na3 2.7939(8) . ?
 Cl2 Na3 2.6811(8) . ?
 Na1 Na1 3.534(2) 2_666 ?
 Na1 Cl7 2.7997(14) . ?
 Na1 Cl6 3.0009(14) . ?
 Na1 O22 2.416(2) . ?
 Na1 O22 2.323(2) 2_666 ?
 Na1 N4A 2.449(4) . ?
 N11 C12 1.344(4) . ?
 N11 C16 1.343(4) . ?
 N28 C29 1.335(3) . ?
 N28 C30 1.349(4) . ?
 C12 H12 0.9500 . ?
 C12 C13 1.384(4) . ?
 C17 C13 1.462(4) . ?
 C17 N18 1.339(4) . ?
 C17 N21 1.355(4) . ?
 C13 C14 1.391(4) . ?
 N1N O1N 1.124(4) . ?
 O2N N2N 1.110(3) . ?
 C16 H16 0.9500 . ?
 C16 C15 1.378(4) . ?
 O22 N18 1.296(3) . ?
 N18 C19 1.503(3) . ?
 C19 C27 1.520(4) . ?
 C19 C20 1.577(4) . ?
 C19 C26 1.521(4) . ?
 N21 O23 1.273(3) . ?
 N21 C20 1.493(4) . ?
 C32 C33 1.400(4) . ?
 C32 C29 1.391(4) . ?
 C32 C34 1.452(4) . ?
 C27 H27A 0.9800 . ?
 C27 H27B 0.9800 . ?
 C27 H27C 0.9800 . ?
 C33 H33 0.9500 . ?
 C33 C31 1.379(4) . ?
 C29 H29 0.9500 . ?
 C20 C25 1.529(4) . ?
 C20 C24 1.518(4) . ?
 C34 N36 1.341(4) . ?
 C34 N35 1.336(4) . ?
 C14 H14 0.9500 . ?
 C14 C15 1.385(4) . ?
 C30 H30 0.9500 . ?
 C30 C31 1.384(4) . ?
 C15 H15 0.9500 . ?
 C31 H31 0.9500 . ?
 C25 H25A 0.9800 . ?
 C25 H25B 0.9800 . ?
 C25 H25C 0.9800 . ?
 N36 O43 1.286(3) . ?
 N36 C38 1.500(4) . ?
 O43 Na2 2.356(4) . ?
 O43 Na2 2.233(4) 2_655 ?
 N35 O44 1.283(3) . ?
 N35 C37 1.502(4) . ?
 C38 C42 1.513(4) . ?
 C38 C37 1.572(4) . ?
 C38 C41 1.532(4) . ?
 C42 H42A 0.9800 . ?
 C42 H42B 0.9800 . ?
 C42 H42C 0.9800 . ?
 C37 C40 1.534(4) . ?
 C37 C39 1.516(4) . ?
 Na2 Na2 1.031(6) 2_655 ?
 Na2 N1A 2.507(5) 2_655 ?
 Na2 N1A 2.512(5) . ?
 C41 H41A 0.9800 . ?
 C41 H41B 0.9800 . ?
 C41 H41C 0.9800 . ?
 C24 H24A 0.9800 . ?
 C24 H24B 0.9800 . ?
 C24 H24C 0.9800 . ?
 C40 H40A 0.9800 . ?
 C40 H40B 0.9800 . ?
 C40 H40C 0.9800 . ?
 C39 H39A 0.9800 . ?
 C39 H39B 0.9800 . ?
 C39 H39C 0.9800 . ?
 C26 H26A 0.9800 . ?
 C26 H26B 0.9800 . ?
 C26 H26C 0.9800 . ?
 N4A C5A 1.140(5) . ?
 C5A C6A 1.440(5) . ?
 C6A H6AA 0.9800 . ?
 C6A H6AB 0.9800 . ?
 C6A H6AC 0.9800 . ?
 C3A H3AA 0.9800 . ?
 C3A H3AB 0.9800 . ?
 C3A H3AC 0.9800 . ?
 C3A C2A 1.449(6) . ?
 C2A N1A 1.118(6) . ?

loop_
  _geom_angle_atom_site_label_1
  _geom_angle_atom_site_label_2
  _geom_angle_atom_site_label_3
  _geom_angle
  _geom_angle_site_symmetry_1
  _geom_angle_site_symmetry_3
  _geom_angle_publ_flag
 Cl4 Ru1 Na3 55.58(2) . . ?
 Cl3 Ru1 Cl4 87.56(3) . . ?
 Cl3 Ru1 Cl2 89.09(3) . . ?
 Cl3 Ru1 Cl1 87.68(3) . . ?
 Cl3 Ru1 Na3 54.41(2) . . ?
 Cl2 Ru1 Cl4 89.39(3) . . ?
 Cl2 Ru1 Na3 51.557(19) . . ?
 Cl1 Ru1 Cl4 91.62(3) . . ?
 Cl1 Ru1 Cl2 176.57(3) . . ?
 Cl1 Ru1 Na3 126.80(2) . . ?
 N11 Ru1 Cl4 175.62(7) . . ?
 N11 Ru1 Cl3 88.55(7) . . ?
 N11 Ru1 Cl2 88.54(7) . . ?
 N11 Ru1 Cl1 90.23(7) . . ?
 N11 Ru1 Na3 120.30(6) . . ?
 N1N Ru1 Cl4 90.46(9) . . ?
 N1N Ru1 Cl3 175.27(10) . . ?
 N1N Ru1 Cl2 95.19(10) . . ?
 N1N Ru1 Cl1 88.09(10) . . ?
 N1N Ru1 Na3 127.36(10) . . ?
 N1N Ru1 N11 93.57(11) . . ?
 Cl5 Ru2 Na1 52.46(3) . . ?
 Cl5 Ru2 Cl6 88.76(3) . . ?
 Cl8 Ru2 Cl5 89.97(3) . . ?
 Cl8 Ru2 Na1 118.43(3) . . ?
 Cl8 Ru2 Cl7 87.77(3) . . ?
 Cl8 Ru2 Cl6 175.19(3) . . ?
 Cl7 Ru2 Cl5 90.59(3) . . ?
 Cl7 Ru2 Na1 52.51(3) . . ?
 Cl7 Ru2 Cl6 87.61(3) . . ?
 Cl6 Ru2 Na1 57.37(3) . . ?
 N28 Ru2 Cl5 178.16(7) . . ?
 N28 Ru2 Na1 126.22(7) . . ?
 N28 Ru2 Cl8 89.79(7) . . ?
 N28 Ru2 Cl7 87.59(7) . . ?
 N28 Ru2 Cl6 91.34(7) . . ?
 N2N Ru2 Cl5 90.43(8) . . ?
 N2N Ru2 Na1 128.58(9) . . ?
 N2N Ru2 Cl8 91.75(10) . . ?
 N2N Ru2 Cl7 178.88(9) . . ?
 N2N Ru2 Cl6 92.89(10) . . ?
 N2N Ru2 N28 91.40(10) . . ?
 Ru2 Cl5 Na1 85.33(4) . . ?
 Ru1 Cl4 Na3 80.77(2) . . ?
 Ru1 Cl4 Na2 115.81(7) . . ?
 Na3 Cl4 Na2 115.37(7) . . ?
 Ru1 Cl3 Na3 82.53(2) . . ?
 Ru1 Cl2 Na3 84.35(2) . . ?
 Ru2 Na1 Na1 135.79(6) . 2_666 ?
 Cl5 Na1 Ru2 42.21(2) . . ?
 Cl5 Na1 Na1 94.91(6) . 2_666 ?
 Cl5 Na1 Cl7 74.01(4) . . ?
 Cl5 Na1 Cl6 69.81(4) . . ?
 Cl7 Na1 Ru2 42.19(2) . . ?
 Cl7 Na1 Na1 133.23(6) . 2_666 ?
 Cl7 Na1 Cl6 68.94(3) . . ?
 Cl6 Na1 Ru2 41.90(2) . . ?
 Cl6 Na1 Na1 149.92(7) . 2_666 ?
 O22 Na1 Ru2 116.89(7) . . ?
 O22 Na1 Ru2 128.34(7) 2_666 . ?
 O22 Na1 Cl5 93.18(7) 2_666 . ?
 O22 Na1 Cl5 94.12(7) . . ?
 O22 Na1 Na1 40.77(5) . 2_666 ?
 O22 Na1 Na1 42.78(6) 2_666 2_666 ?
 O22 Na1 Cl7 93.79(6) . . ?
 O22 Na1 Cl7 166.74(8) 2_666 . ?
 O22 Na1 Cl6 110.32(7) 2_666 . ?
 O22 Na1 Cl6 158.76(7) . . ?
 O22 Na1 O22 83.55(8) 2_666 . ?
 O22 Na1 N4A 104.66(11) 2_666 . ?
 O22 Na1 N4A 108.91(11) . . ?
 N4A Na1 Ru2 110.95(9) . . ?
 N4A Na1 Cl5 152.06(10) . . ?
 N4A Na1 Na1 112.82(10) . 2_666 ?
 N4A Na1 Cl7 88.50(9) . . ?
 N4A Na1 Cl6 83.75(9) . . ?
 Ru2 Cl7 Na1 85.30(4) . . ?
 Ru2 Cl6 Na1 80.73(3) . . ?
 Ru1 Na3 Ru1 180.0 . 2_665 ?
 Cl4 Na3 Ru1 136.347(15) . 2_665 ?
 Cl4 Na3 Ru1 136.345(15) 2_665 . ?
 Cl4 Na3 Ru1 43.653(15) . . ?
 Cl4 Na3 Ru1 43.654(15) 2_665 2_665 ?
 Cl4 Na3 Cl4 180.0 2_665 . ?
 Cl3 Na3 Ru1 136.944(15) 2_665 . ?
 Cl3 Na3 Ru1 43.057(15) . . ?
 Cl3 Na3 Ru1 136.943(15) . 2_665 ?
 Cl3 Na3 Ru1 43.057(15) 2_665 2_665 ?
 Cl3 Na3 Cl4 109.12(2) . 2_665 ?
 Cl3 Na3 Cl4 109.12(2) 2_665 . ?
 Cl3 Na3 Cl4 70.89(2) 2_665 2_665 ?
 Cl3 Na3 Cl4 70.88(2) . . ?
 Cl3 Na3 Cl3 180.0 . 2_665 ?
 Cl2 Na3 Ru1 44.095(16) . . ?
 Cl2 Na3 Ru1 135.906(16) 2_665 . ?
 Cl2 Na3 Ru1 135.906(16) . 2_665 ?
 Cl2 Na3 Ru1 44.093(16) 2_665 2_665 ?
 Cl2 Na3 Cl4 74.56(2) . . ?
 Cl2 Na3 Cl4 105.44(2) . 2_665 ?
 Cl2 Na3 Cl4 74.56(2) 2_665 2_665 ?
 Cl2 Na3 Cl4 105.44(2) 2_665 . ?
 Cl2 Na3 Cl3 74.53(2) . . ?
 Cl2 Na3 Cl3 105.47(2) . 2_665 ?
 Cl2 Na3 Cl3 105.47(2) 2_665 . ?
 Cl2 Na3 Cl3 74.53(2) 2_665 2_665 ?
 Cl2 Na3 Cl2 180.0 . 2_665 ?
 C12 N11 Ru1 118.83(19) . . ?
 C16 N11 Ru1 122.6(2) . . ?
 C16 N11 C12 118.6(3) . . ?
 C29 N28 Ru2 120.76(19) . . ?
 C29 N28 C30 119.0(2) . . ?
 C30 N28 Ru2 120.2(2) . . ?
 N11 C12 H12 118.8 . . ?
 N11 C12 C13 122.3(3) . . ?
 C13 C12 H12 118.8 . . ?
 N18 C17 C13 127.0(3) . . ?
 N18 C17 N21 109.0(2) . . ?
 N21 C17 C13 124.0(3) . . ?
 C12 C13 C17 118.5(3) . . ?
 C12 C13 C14 118.9(3) . . ?
 C14 C13 C17 122.5(3) . . ?
 O1N N1N Ru1 173.6(3) . . ?
 O2N N2N Ru2 179.0(3) . . ?
 N11 C16 H16 119.0 . . ?
 N11 C16 C15 122.1(3) . . ?
 C15 C16 H16 119.0 . . ?
 Na1 O22 Na1 96.45(8) 2_666 . ?
 N18 O22 Na1 121.04(16) . . ?
 N18 O22 Na1 141.10(17) . 2_666 ?
 C17 N18 C19 112.8(2) . . ?
 O22 N18 C17 124.4(2) . . ?
 O22 N18 C19 122.7(2) . . ?
 N18 C19 C27 109.5(2) . . ?
 N18 C19 C20 100.8(2) . . ?
 N18 C19 C26 107.5(2) . . ?
 C27 C19 C20 114.0(2) . . ?
 C27 C19 C26 110.4(3) . . ?
 C26 C19 C20 114.0(2) . . ?
 C17 N21 C20 112.6(2) . . ?
 O23 N21 C17 124.6(3) . . ?
 O23 N21 C20 122.4(3) . . ?
 C33 C32 C34 120.9(3) . . ?
 C29 C32 C33 118.4(3) . . ?
 C29 C32 C34 120.6(2) . . ?
 C19 C27 H27A 109.5 . . ?
 C19 C27 H27B 109.5 . . ?
 C19 C27 H27C 109.5 . . ?
 H27A C27 H27B 109.5 . . ?
 H27A C27 H27C 109.5 . . ?
 H27B C27 H27C 109.5 . . ?
 C32 C33 H33 120.7 . . ?
 C31 C33 C32 118.6(3) . . ?
 C31 C33 H33 120.7 . . ?
 N28 C29 C32 122.4(3) . . ?
 N28 C29 H29 118.8 . . ?
 C32 C29 H29 118.8 . . ?
 N21 C20 C19 101.0(2) . . ?
 N21 C20 C25 106.3(3) . . ?
 N21 C20 C24 110.4(3) . . ?
 C25 C20 C19 114.1(3) . . ?
 C24 C20 C19 115.2(3) . . ?
 C24 C20 C25 109.2(3) . . ?
 N36 C34 C32 125.9(3) . . ?
 N35 C34 C32 124.6(3) . . ?
 N35 C34 N36 109.4(2) . . ?
 C13 C14 H14 120.9 . . ?
 C15 C14 C13 118.3(3) . . ?
 C15 C14 H14 120.9 . . ?
 N28 C30 H30 119.2 . . ?
 N28 C30 C31 121.7(3) . . ?
 C31 C30 H30 119.2 . . ?
 C16 C15 C14 119.7(3) . . ?
 C16 C15 H15 120.2 . . ?
 C14 C15 H15 120.2 . . ?
 C33 C31 C30 119.7(3) . . ?
 C33 C31 H31 120.2 . . ?
 C30 C31 H31 120.2 . . ?
 C20 C25 H25A 109.5 . . ?
 C20 C25 H25B 109.5 . . ?
 C20 C25 H25C 109.5 . . ?
 H25A C25 H25B 109.5 . . ?
 H25A C25 H25C 109.5 . . ?
 H25B C25 H25C 109.5 . . ?
 C34 N36 C38 113.3(2) . . ?
 O43 N36 C34 124.9(3) . . ?
 O43 N36 C38 121.7(2) . . ?
 N36 O43 Na2 136.6(2) . . ?
 N36 O43 Na2 161.7(2) . 2_655 ?
 Na2 O43 Na2 25.80(16) 2_655 . ?
 C34 N35 C37 112.8(2) . . ?
 O44 N35 C34 125.5(3) . . ?
 O44 N35 C37 121.1(2) . . ?
 N36 C38 C42 108.5(2) . . ?
 N36 C38 C37 101.1(2) . . ?
 N36 C38 C41 107.2(2) . . ?
 C42 C38 C37 115.6(2) . . ?
 C42 C38 C41 109.3(3) . . ?
 C41 C38 C37 114.3(3) . . ?
 C38 C42 H42A 109.5 . . ?
 C38 C42 H42B 109.5 . . ?
 C38 C42 H42C 109.5 . . ?
 H42A C42 H42B 109.5 . . ?
 H42A C42 H42C 109.5 . . ?
 H42B C42 H42C 109.5 . . ?
 N35 C37 C38 101.5(2) . . ?
 N35 C37 C40 105.9(3) . . ?
 N35 C37 C39 109.3(3) . . ?
 C40 C37 C38 114.3(2) . . ?
 C39 C37 C38 115.5(3) . . ?
 C39 C37 C40 109.5(3) . . ?
 O43 Na2 Cl4 96.06(13) 2_655 . ?
 O43 Na2 Cl4 109.74(13) . . ?
 O43 Na2 O43 154.20(16) 2_655 . ?
 O43 Na2 N1A 87.30(15) . . ?
 O43 Na2 N1A 87.29(15) 2_655 . ?
 O43 Na2 N1A 90.14(15) 2_655 2_655 ?
 O43 Na2 N1A 84.82(14) . 2_655 ?
 Na2 Na2 Cl4 179.3(5) 2_655 . ?
 Na2 Na2 O43 83.7(4) 2_655 2_655 ?
 Na2 Na2 O43 70.5(3) 2_655 . ?
 Na2 Na2 N1A 77.9(4) 2_655 . ?
 Na2 Na2 N1A 78.4(4) 2_655 2_655 ?
 N1A Na2 Cl4 100.87(17) 2_655 . ?
 N1A Na2 Cl4 102.85(16) . . ?
 N1A Na2 N1A 156.28(14) 2_655 . ?
 C38 C41 H41A 109.5 . . ?
 C38 C41 H41B 109.5 . . ?
 C38 C41 H41C 109.5 . . ?
 H41A C41 H41B 109.5 . . ?
 H41A C41 H41C 109.5 . . ?
 H41B C41 H41C 109.5 . . ?
 C20 C24 H24A 109.5 . . ?
 C20 C24 H24B 109.5 . . ?
 C20 C24 H24C 109.5 . . ?
 H24A C24 H24B 109.5 . . ?
 H24A C24 H24C 109.5 . . ?
 H24B C24 H24C 109.5 . . ?
 C37 C40 H40A 109.5 . . ?
 C37 C40 H40B 109.5 . . ?
 C37 C40 H40C 109.5 . . ?
 H40A C40 H40B 109.5 . . ?
 H40A C40 H40C 109.5 . . ?
 H40B C40 H40C 109.5 . . ?
 C37 C39 H39A 109.5 . . ?
 C37 C39 H39B 109.5 . . ?
 C37 C39 H39C 109.5 . . ?
 H39A C39 H39B 109.5 . . ?
 H39A C39 H39C 109.5 . . ?
 H39B C39 H39C 109.5 . . ?
 C19 C26 H26A 109.5 . . ?
 C19 C26 H26B 109.5 . . ?
 C19 C26 H26C 109.5 . . ?
 H26A C26 H26B 109.5 . . ?
 H26A C26 H26C 109.5 . . ?
 H26B C26 H26C 109.5 . . ?
 C5A N4A Na1 129.2(3) . . ?
 N4A C5A C6A 179.5(5) . . ?
 C5A C6A H6AA 109.5 . . ?
 C5A C6A H6AB 109.5 . . ?
 C5A C6A H6AC 109.5 . . ?
 H6AA C6A H6AB 109.5 . . ?
 H6AA C6A H6AC 109.5 . . ?
 H6AB C6A H6AC 109.5 . . ?
 H3AA C3A H3AB 109.5 . . ?
 H3AA C3A H3AC 109.5 . . ?
 H3AB C3A H3AC 109.5 . . ?
 C2A C3A H3AA 109.5 . . ?
 C2A C3A H3AB 109.5 . . ?
 C2A C3A H3AC 109.5 . . ?
 N1A C2A C3A 177.9(7) . . ?
 Na2 N1A Na2 23.72(14) 2_655 . ?
 C2A N1A Na2 154.5(6) . . ?
 C2A N1A Na2 171.5(4) . 2_655 ?

_shelx_res_file
;
TITL kru519_a.res in P-1
    kru519.res
    created by SHELXL-2016/6 at 12:30:41 on 09-Jun-2023
REM Old TITL kru519 in P-1
REM SHELXT solution in P-1
REM R1 0.091, Rweak 0.005, Alpha 0.090, Orientation as input
REM Formula found by SHELXT: C72 N6 O12 Na3 Cl16 Ru4
CELL 0.71073 10.4158 10.8548 20.9285 99.831 94.477 109.036
ZERR 2 0.0002 0.0002 0.0004 0.001 0.001 0.001
LATT 1
SFAC C H Cl N Na O Ru
UNIT 56 76 16 20 4 12 4
EADP N1A C2A

L.S. 15
PLAN  40
SIZE 0.2 0.07 0.03
TEMP -100
GRID
BOND $H
fmap
ACTA
MERG 2
OMIT 1 0 0
OMIT -8 -9 4
OMIT 3 0 6
OMIT 4 0 4
REM <olex2.extras>
REM <HklSrc "%.\\kru519.hkl">
REM </olex2.extras>

WGHT    0.100000
FVAR       0.33179
RU1   7    0.369174    0.371339    0.128117    11.00000    0.01554    0.01754 =
         0.01517    0.00476    0.00007    0.00476
RU2   7    0.609605    0.115796    0.387714    11.00000    0.01642    0.01971 =
         0.01475    0.00167   -0.00122    0.00594
CL5   3    0.657999    0.266121    0.490227    11.00000    0.03011    0.02501 =
         0.01966   -0.00094   -0.00049    0.00597
CL4   3    0.339532    0.245001    0.019707    11.00000    0.03272    0.02541 =
         0.01916   -0.00020    0.00144    0.00450
CL3   3    0.307498    0.529528    0.081596    11.00000    0.02485    0.02313 =
         0.02363    0.00888   -0.00112    0.00930
CL2   3    0.602611    0.485498    0.118908    11.00000    0.01709    0.03624 =
         0.02077    0.00692    0.00375    0.00532
NA1   5    0.458021    0.355608    0.437495    11.00000    0.02701    0.02622 =
         0.02354    0.00261    0.00723    0.00600
CL8   3    0.845561    0.189961    0.377196    11.00000    0.01485    0.04013 =
         0.02970   -0.00398   -0.00246    0.00429
CL7   3    0.588374    0.283307    0.332738    11.00000    0.02781    0.02251 =
         0.02147    0.00616    0.00490    0.00811
CL6   3    0.371638    0.058264    0.396206    11.00000    0.02104    0.02854 =
         0.02247    0.00395    0.00482    0.00631
CL1   3    0.133941    0.269451    0.136744    11.00000    0.01809    0.03139 =
         0.02728    0.00691    0.00168    0.00142
NA3   5    0.500000    0.500000    0.000000    10.50000    0.03220    0.03974 =
         0.01881    0.01071    0.00449    0.00453
N11   4    0.398954    0.496447    0.221092    11.00000    0.01439    0.02111 =
         0.01652    0.00477    0.00146    0.00533
N28   4    0.566446   -0.013426    0.294616    11.00000    0.01591    0.02064 =
         0.01684    0.00416   -0.00030    0.00641
C12   1    0.517045    0.526495    0.261133    11.00000    0.01676    0.02087 =
         0.01656    0.00631    0.00345    0.00661
AFIX  43
H12   2    0.585621    0.493535    0.245947    11.00000   -1.20000
AFIX   0
C17   1    0.676267    0.636664    0.362644    11.00000    0.01432    0.02285 =
         0.01447    0.00261   -0.00029    0.00346
C13   1    0.542294    0.603760    0.323712    11.00000    0.01445    0.02545 =
         0.01685    0.00658    0.00127    0.00556
N1N   4    0.401181    0.245151    0.160163    11.00000    0.03122    0.02580 =
         0.02137    0.00459   -0.00274    0.00641
O2N   6    0.635554   -0.090368    0.451051    11.00000    0.05823    0.04910 =
         0.03354    0.00955   -0.00327    0.03094
N2N   4    0.626119   -0.009596    0.426957    11.00000    0.03241    0.02193 =
         0.01696    0.00105    0.00091    0.00443
C16   1    0.304086    0.546703    0.242048    11.00000    0.01446    0.02945 =
         0.01852    0.00501   -0.00014    0.00724
AFIX  43
H16   2    0.222046    0.528916    0.213271    11.00000   -1.20000
AFIX   0
O1N   6    0.409356    0.156783    0.179132    11.00000    0.08618    0.03449 =
         0.05173    0.01072   -0.01949    0.02647
O22   6    0.606319    0.586271    0.461060    11.00000    0.01691    0.02592 =
         0.01406    0.00367    0.00401    0.00366
N18   4    0.700878    0.629270    0.425379    11.00000    0.01234    0.01892 =
         0.01474    0.00217    0.00097    0.00249
C19   1    0.851309    0.682399    0.451815    11.00000    0.01300    0.01845 =
         0.02044    0.00336   -0.00247    0.00362
N21   4    0.797341    0.679217    0.339318    11.00000    0.01609    0.03454 =
         0.02034    0.01103    0.00358    0.00462
C32   1    0.419753   -0.119644    0.192761    11.00000    0.01411    0.01486 =
         0.01652    0.00186    0.00097    0.00427
C27   1    0.884320    0.588638    0.491362    11.00000    0.02221    0.02913 =
         0.02732    0.01089   -0.00238    0.00974
AFIX 137
H27A  2    0.983882    0.617058    0.503860    11.00000   -1.50000
H27B  2    0.850528    0.497824    0.464816    11.00000   -1.50000
H27C  2    0.839833    0.590583    0.530907    11.00000   -1.50000
AFIX   0
C33   1    0.518355   -0.171474    0.169947    11.00000    0.01834    0.02626 =
         0.02180   -0.00425    0.00138    0.00517
AFIX  43
H33   2    0.504380   -0.221207    0.126422    11.00000   -1.20000
AFIX   0
O23   6    0.809652    0.699799    0.281670    11.00000    0.02544    0.08042 =
         0.02211    0.02720    0.00525    0.00899
C29   1    0.449043   -0.040236    0.255415    11.00000    0.01699    0.02069 =
         0.01398    0.00366    0.00130    0.00847
AFIX  43
H29   2    0.383068   -0.003734    0.270880    11.00000   -1.20000
AFIX   0
C20   1    0.916208    0.685958    0.386248    11.00000    0.01213    0.03081 =
         0.01969    0.00294   -0.00110    0.00288
C34   1    0.287434   -0.152838    0.153242    11.00000    0.01285    0.01581 =
         0.01629    0.00006   -0.00030    0.00312
C14   1    0.441002    0.649973    0.346529    11.00000    0.02015    0.02911 =
         0.01655    0.00219    0.00194    0.00834
AFIX  43
H14   2    0.453118    0.698601    0.390166    11.00000   -1.20000
AFIX   0
C30   1    0.658318   -0.068946    0.273790    11.00000    0.01638    0.02612 =
         0.02310   -0.00031   -0.00368    0.00844
AFIX  43
H30   2    0.740316   -0.052838    0.302255    11.00000   -1.20000
AFIX   0
C15   1    0.322039    0.623245    0.303976    11.00000    0.01744    0.03748 =
         0.02303    0.00338    0.00364    0.01467
AFIX  43
H15   2    0.253143    0.657521    0.317420    11.00000   -1.20000
AFIX   0
C31   1    0.636165   -0.148782    0.212006    11.00000    0.01812    0.03187 =
         0.02953   -0.00389    0.00053    0.01279
AFIX  43
H31   2    0.701806   -0.187743    0.198651    11.00000   -1.20000
AFIX   0
C25   1    0.953239    0.562941    0.360925    11.00000    0.02630    0.04536 =
         0.03346   -0.00056    0.00734    0.01749
AFIX 137
H25A  2    0.875058    0.482335    0.360526    11.00000   -1.50000
H25B  2    1.032641    0.563890    0.389659    11.00000   -1.50000
H25C  2    0.975747    0.563769    0.316364    11.00000   -1.50000
AFIX   0
N36   4    0.265244   -0.165957    0.088056    11.00000    0.01517    0.02350 =
         0.01617    0.00367   -0.00028    0.00315
O43   6    0.359713   -0.142389    0.051104    11.00000    0.02216    0.05956 =
         0.02034    0.01057    0.00708   -0.00019
N35   4    0.167516   -0.182386    0.176393    11.00000    0.01436    0.02992 =
         0.01757    0.00276    0.00053    0.00597
O44   6    0.151856   -0.182463    0.236591    11.00000    0.02105    0.06916 =
         0.01706    0.00622    0.00580    0.01076
C38   1    0.116707   -0.203055    0.061294    11.00000    0.01755    0.01797 =
         0.02056    0.00119   -0.00401    0.00352
C42   1    0.080779   -0.317877    0.002928    11.00000    0.02857    0.02018 =
         0.01850   -0.00107   -0.00422    0.00322
AFIX 137
H42A  2    0.134426   -0.289098   -0.031662    11.00000   -1.50000
H42B  2   -0.017299   -0.346677   -0.013583    11.00000   -1.50000
H42C  2    0.101944   -0.392213    0.016233    11.00000   -1.50000
AFIX   0
C37   1    0.046378   -0.236300    0.123047    11.00000    0.01606    0.02984 =
         0.01871   -0.00034    0.00101    0.00546
NA2   5    0.476984    0.035668    0.003128    10.50000    0.03726    0.04612 =
         0.02525    0.00838    0.00731   -0.00687
C41   1    0.099753   -0.081511    0.038715    11.00000    0.04797    0.02420 =
         0.04611    0.00595   -0.00922    0.01688
AFIX 137
H41A  2    0.124023   -0.006714    0.076360    11.00000   -1.50000
H41B  2    0.004210   -0.103149    0.019468    11.00000   -1.50000
H41C  2    0.160180   -0.056921    0.005874    11.00000   -1.50000
AFIX   0
C24   1    1.038051    0.810518    0.387265    11.00000    0.02257    0.04318 =
         0.03131    0.00811    0.00340   -0.00543
AFIX 137
H24A  2    1.072894    0.803025    0.345137    11.00000   -1.50000
H24B  2    1.110593    0.820307    0.422520    11.00000   -1.50000
H24C  2    1.009300    0.888610    0.394796    11.00000   -1.50000
AFIX   0
C40   1   -0.016035   -0.385708    0.122084    11.00000    0.02692    0.03849 =
         0.03070    0.00629    0.01035   -0.00357
AFIX 137
H40A  2    0.052907   -0.427704    0.113659    11.00000   -1.50000
H40B  2   -0.095164   -0.426682    0.087435    11.00000   -1.50000
H40C  2   -0.045728   -0.398206    0.164544    11.00000   -1.50000
AFIX   0
C39   1   -0.057498   -0.169798    0.139985    11.00000    0.02668    0.07538 =
         0.03297   -0.00866   -0.00646    0.03229
AFIX 137
H39A  2   -0.087865   -0.188415    0.181589    11.00000   -1.50000
H39B  2   -0.136634   -0.204659    0.105238    11.00000   -1.50000
H39C  2   -0.015130   -0.073343    0.144073    11.00000   -1.50000
AFIX   0
C26   1    0.882168    0.819116    0.495221    11.00000    0.02186    0.02245 =
         0.02922   -0.00117    0.00153    0.00396
AFIX 137
H26A  2    0.864249    0.879529    0.468719    11.00000   -1.50000
H26B  2    0.978708    0.854420    0.515141    11.00000   -1.50000
H26C  2    0.823429    0.811481    0.529769    11.00000   -1.50000
AFIX   0
N4A   4    0.259893    0.327451    0.357987    11.00000    0.04022    0.04853 =
         0.04299    0.00971    0.00178    0.01664
C5A   1    0.186890    0.232947    0.323739    11.00000    0.03311    0.04405 =
         0.02834    0.01181    0.00678    0.02033
C6A   1    0.095193    0.112835    0.280779    11.00000    0.04518    0.03799 =
         0.03707    0.00266    0.00621    0.01220
AFIX 137
H6AA  2    0.131730    0.040539    0.281801    11.00000   -1.50000
H6AB  2    0.086729    0.127608    0.235975    11.00000   -1.50000
H6AC  2    0.004716    0.088617    0.295327    11.00000   -1.50000
AFIX   0
PART 2
C3A   1    0.814582    0.290400    0.199458    11.00000    0.03215    0.06409 =
         0.04347    0.00185    0.01054    0.00817
AFIX 137
H3AA  2    0.910531    0.309998    0.192449    11.00000   -1.50000
H3AB  2    0.801534    0.258161    0.240289    11.00000   -1.50000
H3AC  2    0.791486    0.371585    0.202376    11.00000   -1.50000
AFIX   0
PART 0
C2A   1    0.726139    0.189033    0.145123    11.00000    0.06261    0.09532 =
         0.03308    0.01969    0.00083   -0.02492
N1A   4    0.656632    0.113678    0.102616    11.00000    0.06261    0.09532 =
         0.03308    0.01969    0.00083   -0.02492
HKLF 4


REM  kru519_a.res in P-1
REM R1 =  0.0460 for   11225 Fo > 4sig(Fo)  and  0.0835 for all   16301 data
REM    515 parameters refined using      0 restraints

END

WGHT      0.0349      0.5237

REM Highest difference peak  1.681,  deepest hole -1.123,  1-sigma level  0.131
Q1    1   0.6960 -0.0271  0.4300  11.00000  0.05    1.68
Q2    1   0.6530  0.1800  0.3902  11.00000  0.05    0.85
Q3    1   0.8601  0.2490  0.3522  11.00000  0.05    0.77
Q4    1   0.7141  0.0846  0.1019  11.00000  0.05    0.70
Q5    1   0.3626 -0.1497  0.1636  11.00000  0.05    0.61
Q6    1   0.3798 -0.0101  0.4049  11.00000  0.05    0.60
Q7    1   0.5985 -0.0347  0.4208  11.00000  0.05    0.58
Q8    1   0.6644  0.1161  0.3624  11.00000  0.05    0.56
Q9    1   0.7438  0.6751  0.3505  11.00000  0.05    0.56
Q10   1   0.8343  0.0875  0.4390  11.00000  0.05    0.54
Q11   1   0.6040  0.1283  0.0910  11.00000  0.05    0.54
Q12   1   0.7097  0.1985  0.4668  11.00000  0.05    0.54
Q13   1   0.4331  0.3693  0.0957  11.00000  0.05    0.52
Q14   1   0.1330 -0.2619  0.0270  11.00000  0.05    0.51
Q15   1  -0.0248 -0.0844  0.1306  11.00000  0.05    0.51
Q16   1   0.6172  0.1345  0.1189  11.00000  0.05    0.51
Q17   1   0.3037 -0.1640  0.0684  11.00000  0.05    0.51
Q18   1   0.8946  0.7690  0.4546  11.00000  0.05    0.51
Q19   1   0.3737  0.4550  0.1793  11.00000  0.05    0.50
Q20   1   0.5759  0.2866  0.3803  11.00000  0.05    0.50
Q21   1   0.4969  0.0830  0.3590  11.00000  0.05    0.50
Q22   1   0.3306  0.5890  0.2815  11.00000  0.05    0.50
Q23   1   0.3794  0.1843  0.1809  11.00000  0.05    0.49
Q24   1   0.1793  0.2523  0.4002  11.00000  0.05    0.49
Q25   1  -0.2974 -0.2373  0.1091  11.00000  0.05    0.49
Q26   1   0.7108  0.3041  0.5298  11.00000  0.05    0.49
Q27   1   0.6590  0.0501  0.4210  11.00000  0.05    0.48
Q28   1   0.3977  0.7997  0.4211  11.00000  0.05    0.48
Q29   1   0.6796  0.2200  0.5264  11.00000  0.05    0.48
Q30   1   0.2536  0.2529  0.3213  11.00000  0.05    0.48
Q31   1   0.6420 -0.0895  0.2315  11.00000  0.05    0.48
Q32   1   0.9430  0.3805  0.3267  11.00000  0.05    0.48
Q33   1   0.2984  0.3383  0.1694  11.00000  0.05    0.47
Q34   1   0.6939  0.6537  0.3955  11.00000  0.05    0.47
Q35   1   0.6571 -0.1153  0.1971  11.00000  0.05    0.47
Q36   1   0.4401  0.2214  0.1728  11.00000  0.05    0.47
Q37   1   0.2567  0.3391  0.1008  11.00000  0.05    0.47
Q38   1   0.2957  0.3329  0.3482  11.00000  0.05    0.47
Q39   1   0.3177  0.3018  0.1209  11.00000  0.05    0.46
Q40   1   0.3721  0.1047  0.3280  11.00000  0.05    0.46
;
_shelx_res_checksum                72176
_shelx_hkl_file
;
   1   0   0    0.20    0.70
  -2   0   0   27.70    3.30
  -2   0   0   31.80    3.50
   2   0   0   24.60    3.30
   2   0   0   28.50    3.30
   2   0   0   28.40    3.40
  -3   0   0 2234.38   55.19
  -3   0   0 2193.48   54.19
   3   0   0 2190.78   54.19
   3   0   0 2203.58   53.89
   3   0   0 2079.79   54.09
  -4   0   0 8922.01  194.88
  -4   0   0 8790.82  196.18
   4   0   0 8942.11  194.08
   4   0   0 8900.91  195.28
   4   0   0 8703.03  194.58
  -5   0   0  870.71   32.20
  -5   0   0  912.51   31.60
   5   0   0  882.11   30.50
   5   0   0  884.41   31.80
   5   0   0  888.11   31.40
  -6   0   0   90.39   10.20
  -6   0   0   84.49    9.40
  -7   0   0   50.49    7.80
  -7   0   0   55.69    8.00
  -8   0   0  534.75   28.00
  -9   0   0  513.75   28.60
   9   0   0  470.75   26.90
 -10   0   0   10.40    7.50
  10   0   0   16.20    7.30
  10   0   0   17.10    5.80
 -11   0   0    3.10    8.00
  11   0   0   11.80    7.50
  11   0   0   -8.70    5.20
 -12   0   0  146.19   19.00
  12   0   0  123.09   16.80
 -13   0   0   98.39   19.50
  13   0   0   83.09   16.50
  13   0   0  115.49   18.90
 -14   0   0    8.80   13.60
  14   0   0   -9.80   10.80
  15   0   0   -4.10   12.40
  15  -1   0  -17.60   24.90
  14  -1   0   -1.50    9.80
  14  -1   0  -14.50    9.30
  13  -1   0  123.49   20.70
  13  -1   0  164.58   19.70
 -13   1   0  130.19   21.50
  12  -1   0   90.59   15.70
  12  -1   0   80.19   15.60
 -12   1   0   76.99   15.30
  11  -1   0   62.09   12.50
  11  -1   0   40.80   10.50
 -11   1   0   67.89   13.90
  10  -1   0   51.79    9.90
  10  -1   0   71.19   11.50
 -10   1   0   73.49   12.60
   9  -1   0   93.49   12.10
   9  -1   0   87.49   11.10
  -9   1   0   86.89   12.10
   8  -1   0  194.38   14.40
   8  -1   0  193.78   15.60
  -8   1   0  197.98   16.50
  -8   1   0  183.58   16.90
   7  -1   0    7.10    3.30
  -7   1   0    0.90    4.00
  -7   1   0    3.80    3.70
   6  -1   0   14.50    4.90
  -6   1   0   22.30    6.40
  -6   1   0   10.00    4.20
   5  -1   0   16.80    4.70
   5  -1   0   14.00    4.80
   5  -1   0   13.80    3.90
  -5   1   0    8.20    3.70
  -5   1   0   23.00    5.50
   4  -1   0  126.09    9.30
   4  -1   0  115.79   12.70
  -4   1   0  126.29    9.60
  -4   1   0  123.39    8.80
   3  -1   0   -0.70    1.70
   3  -1   0    2.80    1.90
  -3   1   0    2.40    1.70
  -3   1   0    0.50    1.70
   2  -1   0   14.50    2.10
   2  -1   0   21.90    3.10
   2  -1   0   16.10    2.80
  -2   1   0   20.70    3.00
  -2   1   0   21.00    3.00
   1  -1   0   44.10    2.60
   1  -1   0   38.40    2.60
  -1   1   0   47.00    3.20
  -1   1   0   47.50    2.90
  -1  -1   0   13.40    1.70
  -1  -1   0   11.90    1.80
  -1  -1   0   11.30    1.80
   1   1   0   13.60    2.20
   1   1   0   13.20    2.10
   1   1   0   12.90    2.00
  -2  -1   0   16.00    2.80
  -2  -1   0   15.00    2.80
  -2  -1   0   18.40    3.10
   2   1   0   18.40    3.00
   2   1   0   17.80    3.10
   2   1   0   15.30    2.70
  -3  -1   0   79.39    6.40
  -3  -1   0   74.59    6.20
  -3  -1   0   69.99    6.60
   3   1   0   69.19    5.80
   3   1   0   74.99    6.30
   3   1   0   67.49    6.20
  -4  -1   0  394.66   17.40
  -4  -1   0  378.36   18.00
  -4  -1   0  377.26   16.80
   4   1   0  369.66   16.90
   4   1   0  375.16   16.30
   4   1   0  386.06   17.40
  -5  -1   0  355.06   17.60
  -5  -1   0  347.37   18.70
   5   1   0  334.57   16.90
   5   1   0  347.37   17.80
  -6  -1   0   74.29    9.80
  -6  -1   0   81.99    9.40
  -7  -1   0    9.50    4.70
  -7  -1   0   18.80    6.60
  -8  -1   0  631.94   33.90
   8   1   0  725.93   31.90
  -9  -1   0  292.97   22.30
   9   1   0  281.27   21.00
 -10  -1   0    4.30    6.50
  10   1   0    8.30    6.00
 -11  -1   0    2.90    8.00
  11   1   0   -6.90    5.60
  11   1   0   -7.20    5.80
  12   1   0    5.70    8.40
  12   1   0   20.70   10.50
 -13  -1   0   89.79   19.00
  13   1   0   39.40   12.30
  13   1   0   75.99   16.40
 -14  -1   0   21.50   14.90
  14   1   0    1.70   12.40
  14   1   0    9.80   10.90
  15  -2   0   -7.10   12.10
  14  -2   0  176.68   22.00
  14  -2   0  151.68   21.80
 -14   2   0  146.59   22.80
  13  -2   0  172.58   21.80
  13  -2   0  103.49   16.90
 -13   2   0  175.98   22.00
  12  -2   0   -1.70    7.20
  12  -2   0    2.90    6.20
 -12   2   0    2.70    8.70
  11  -2   0  127.59   14.70
  11  -2   0   86.49   13.80
 -11   2   0  123.39   16.70
  10  -2   0 1107.79   44.50
  10  -2   0  940.01   40.50
 -10   2   0  982.90   44.50
   9  -2   0  447.36   25.20
   9  -2   0  478.85   25.30
  -9   2   0  424.16   26.70
   8  -2   0   71.09    9.20
   8  -2   0   91.89   11.10
  -8   2   0   71.79   11.40
  -8   2   0   76.99   10.90
   7  -2   0  132.99   10.90
  -7   2   0  132.79   12.90
  -7   2   0  115.09   11.50
   6  -2   0  876.11   30.40
  -6   2   0  915.21   33.60
  -6   2   0  884.11   34.30
   5  -2   0  400.06   18.90
   5  -2   0  366.46   18.20
   5  -2   0  348.27   16.00
  -5   2   0  399.06   18.70
  -5   2   0  373.06   18.70
   4  -2   0  805.62   24.90
   4  -2   0  751.92   26.50
   4  -2   0  752.22   26.10
  -4   2   0  807.02   27.00
  -4   2   0  770.52   26.90
   3  -2   0    3.70    1.80
   3  -2   0   11.20    3.10
   3  -2   0   10.10    3.20
  -3   2   0    5.50    2.70
  -3   2   0    7.90    2.40
  -3   2   0    4.70    2.10
   2  -2   0 2012.20   47.10
   2  -2   0 1952.60   47.10
   2  -2   0 1989.60   45.90
   2  -2   0 1975.10   48.10
  -2   2   0 2018.60   48.20
  -2   2   0 2042.20   47.60
  -2   2   0 2056.89   47.10
   1  -2   0 9777.22  208.08
   1  -2   0 9782.42  204.58
   1  -2   0 9827.32  203.88
  -1   2   0 9999.00  206.48
   0  -2   0  994.90   24.60
   0  -2   0 1029.10   24.00
   0  -2   0 1036.50   22.40
   0   2   0 1030.20   22.20
   0   2   0 1032.60   24.30
   0   2   0 1019.70   24.70
  -1  -2   0  161.78    6.70
  -1  -2   0  164.78    7.10
   1   2   0  174.18    7.60
   1   2   0  155.98    6.50
   1   2   0  158.18    6.90
   1   2   0  168.18    6.90
  -2  -2   0    1.20    1.50
  -2  -2   0    2.90    1.40
  -2  -2   0    2.10    1.50
   2   2   0    1.10    1.30
   2   2   0    1.10    1.30
   2   2   0    2.80    1.60
  -3  -2   0 1990.40   53.89
  -3  -2   0 1921.01   50.39
  -3  -2   0 1986.00   55.29
   3   2   0 2008.40   49.50
   3   2   0 1962.40   50.39
   3   2   0 1926.41   50.29
  -4  -2   0    4.20    3.00
  -4  -2   0    4.50    2.90
  -4  -2   0   -0.40    2.00
   4   2   0    1.60    2.50
   4   2   0    0.60    2.80
   4   2   0    0.40    2.60
  -5  -2   0  169.28   12.10
  -5  -2   0  174.48   12.90
  -5  -2   0  191.48   13.80
   5   2   0  157.78   12.50
   5   2   0  164.18   12.70
   5   2   0  194.18   14.30
  -6  -2   0   37.70    8.40
  -6  -2   0   47.10    7.30
  -7  -2   0  334.37   22.00
  -7  -2   0  322.77   20.00
  -8  -2   0  209.08   18.50
  -8  -2   0  207.48   17.00
   8   2   0  218.68   17.30
  -9  -2   0   63.49   11.50
   9   2   0   57.89   11.10
 -10  -2   0    4.10    6.70
  10   2   0   -1.50    6.10
 -11  -2   0   80.59   16.30
  11   2   0  121.49   16.60
 -12  -2   0   86.29   17.60
  12   2   0   95.19   21.40
  12   2   0   64.99   16.50
 -13  -2   0    1.60   10.80
  13   2   0    5.00   12.50
  13   2   0   11.60   11.40
  13   2   0   -0.30   10.10
  14   2   0  -17.20   12.20
  14   2   0    6.70   14.70
  14   2   0   -6.90   14.00
  15  -3   0  -14.90   11.20
  15  -3   0    2.80   12.30
  14  -3   0  134.49   20.90
  14  -3   0  156.48   20.90
 -14   3   0   95.99   20.70
  13  -3   0  122.79   17.50
  13  -3   0  123.19   18.40
 -13   3   0  109.79   19.30
  12  -3   0   29.90    9.30
  12  -3   0   28.10   10.60
 -12   3   0   44.60   11.90
  11  -3   0   99.29   14.50
  11  -3   0  114.79   14.80
 -11   3   0  145.49   18.10
  10  -3   0  416.66   25.80
  10  -3   0  442.86   26.00
 -10   3   0  412.76   27.40
   9  -3   0 1276.67   45.70
   9  -3   0 1247.78   46.20
  -9   3   0 1194.38   48.50
   8  -3   0  170.38   13.90
   8  -3   0  144.79   13.60
  -8   3   0  152.68   14.50
   7  -3   0   66.09    8.20
   7  -3   0   71.19    9.10
  -7   3   0   58.39    8.80
  -7   3   0   56.79    9.50
   6  -3   0  166.78   15.40
   6  -3   0  181.48   12.30
   6  -3   0  187.28   12.60
  -6   3   0  197.28   14.50
  -6   3   0  177.68   13.60
   5  -3   0    2.70    2.70
   5  -3   0    3.20    3.40
   5  -3   0    2.20    4.00
   5  -3   0    5.10    2.60
  -5   3   0    6.70    3.70
  -5   3   0    0.30    2.80
   4  -3   0  118.89    8.30
   4  -3   0  119.49    9.30
   4  -3   0  106.69    8.50
   4  -3   0  106.79    7.50
  -4   3   0  115.79    8.90
  -4   3   0  109.59    7.60
  -4   3   0  110.59    8.90
   3  -3   0  299.77   11.50
   3  -3   0  275.27   12.10
   3  -3   0  269.87   12.00
   3  -3   0  278.07   13.10
  -3   3   0  266.47   11.70
  -3   3   0  287.67   13.20
   2  -3   0   75.19    5.40
   2  -3   0   59.99    4.60
   2  -3   0   63.89    4.00
   2  -3   0   63.29    5.40
  -2   3   0   61.79    5.00
  -2   3   0   63.89    5.30
   1  -3   0    4.50    1.00
   1  -3   0    5.80    1.80
   1  -3   0    5.20    1.70
  -1   3   0    6.00    1.70
  -1   3   0    1.20    1.60
  -1   3   0    3.50    0.90
   0  -3   0  198.88    8.30
   0  -3   0  195.88    5.70
   0  -3   0  187.38    7.30
   0   3   0  192.28    8.10
   0   3   0  200.98    5.50
   0   3   0  197.18    7.80
  -1  -3   0  124.99    5.90
  -1  -3   0  106.59    6.40
   1   3   0  130.59    6.40
   1   3   0  129.89    5.80
   1   3   0  122.79    6.30
   1   3   0  135.09    6.90
  -2  -3   0   69.89    5.70
  -2  -3   0   65.89    5.60
   2   3   0   76.89    5.30
   2   3   0   77.59    5.70
   2   3   0   73.39    5.80
   2   3   0   66.59    5.40
  -3  -3   0   80.99    7.20
  -3  -3   0   75.19    6.80
   3   3   0   75.39    7.00
   3   3   0   74.09    6.50
   3   3   0   79.79    6.50
   3   3   0   86.09    7.20
  -4  -3   0   11.10    4.10
  -4  -3   0   14.40    4.30
  -4  -3   0    3.30    2.50
   4   3   0    2.90    2.70
  -5  -3   0   11.90    4.60
  -5  -3   0    7.10    2.70
  -5  -3   0    8.80    2.80
   5   3   0   16.90    5.40
   5   3   0   13.80    5.40
  -6  -3   0   38.00    7.30
  -6  -3   0   25.80    6.10
  -6  -3   0   37.80    7.60
  -7  -3   0  300.07   19.70
  -7  -3   0  290.67   20.80
  -8  -3   0   34.50    8.80
   8   3   0   26.70    7.30
  -9  -3   0    6.20    6.20
   9   3   0    1.00    5.70
 -10  -3   0    8.90    7.90
  10   3   0   13.00    8.00
  10   3   0    6.90    6.90
  11   3   0  214.68   21.80
  11   3   0  228.98   22.20
  12   3   0  175.48   21.70
  12   3   0  165.28   21.20
  12   3   0  129.69   19.00
  13   3   0   12.40   13.80
  13   3   0    2.20   10.90
  13   3   0    3.80   11.70
  15  -4   0   56.49   15.30
  14  -4   0   60.59   15.40
  14  -4   0   61.29   13.30
 -14   4   0  117.29   20.60
  13  -4   0  276.77   25.70
  13  -4   0  241.18   23.20
 -13   4   0  266.97   26.40
  12  -4   0  171.88   19.10
  12  -4   0  162.18   19.00
 -12   4   0  172.18   20.50
  11  -4   0  383.46   26.60
  11  -4   0  423.86   26.80
 -11   4   0  386.96   28.00
  10  -4   0   11.90    6.60
  10  -4   0   29.10    7.50
 -10   4   0   27.30    8.50
   9  -4   0  491.05   26.40
   9  -4   0  515.25   27.00
  -9   4   0  512.55   29.30
   8  -4   0  186.58   14.50
   8  -4   0  212.18   15.60
  -8   4   0  220.48   17.30
   7  -4   0  442.96   21.50
   7  -4   0  447.76   21.70
  -7   4   0  437.66   23.90
   6  -4   0   16.40    3.90
   6  -4   0   13.60    4.20
   6  -4   0   18.30    5.90
  -6   4   0   21.60    6.30
   5  -4   0 1543.65   47.10
   5  -4   0 1531.55   44.40
   5  -4   0 1533.25   43.00
  -5   4   0 1498.55   43.60
  -5   4   0 1578.84   46.90
   4  -4   0  598.94   21.90
   4  -4   0  544.75   22.30
   4  -4   0  586.14   21.70
   4  -4   0  601.04   20.30
  -4   4   0  592.34   24.40
  -4   4   0  631.74   23.50
   3  -4   0 2140.89   55.89
   3  -4   0 2175.28   53.39
   3  -4   0 2219.88   51.79
   3  -4   0 2206.58   55.09
  -3   4   0 2138.89   59.09
  -3   4   0 2220.88   54.89
   2  -4   0   22.50    2.60
   2  -4   0   25.50    3.70
   2  -4   0   23.80    3.20
   2  -4   0   26.00    4.00
  -2   4   0   26.00    3.80
  -2   4   0   23.80    3.60
   1  -4   0 2077.19   50.59
   1  -4   0 2105.79   45.00
   1  -4   0 2091.69   49.70
  -1   4   0 2113.39   50.29
  -1   4   0 2088.19   50.79
   0  -4   0  529.15   15.90
   0  -4   0  534.05   17.60
   0  -4   0  532.55   13.20
   0   4   0  546.05   16.80
   0   4   0  546.25   12.80
   0   4   0  528.75   17.40
  -1  -4   0  147.89    6.80
  -1  -4   0  140.89    7.00
  -1  -4   0  147.89    8.50
   1   4   0  152.88    8.30
   1   4   0  143.09    6.40
   1   4   0  153.48    7.90
  -2  -4   0  175.28    9.90
  -2  -4   0  187.08    9.50
   2   4   0  185.08    9.40
   2   4   0  190.98    9.90
   2   4   0  170.48    9.50
   2   4   0  172.08    8.90
  -3  -4   0   77.99    7.40
  -3  -4   0   85.69    7.30
   3   4   0   93.49    8.10
   3   4   0   88.19    7.10
   3   4   0   76.19    6.80
   3   4   0   78.69    7.00
  -4  -4   0  131.19   10.40
  -4  -4   0  105.19    9.70
   4   4   0  133.89   11.00
   4   4   0  133.29   10.10
   4   4   0  129.49    9.50
  -5  -4   0   14.00    4.50
  -5  -4   0   17.00    6.20
   5   4   0   16.30    4.70
   5   4   0   10.60    5.10
  -6  -4   0  169.88   14.90
  -6  -4   0  180.38   15.30
   6   4   0  166.68   13.20
  -7  -4   0   34.60    8.80
   7   4   0   27.20    7.00
   7   4   0   24.00    6.90
   8   4   0  420.96   24.60
   8   4   0  399.36   23.70
   9   4   0   16.60    7.70
   9   4   0    2.20    6.50
  10   4   0   -5.90    6.60
  10   4   0   -8.20    6.30
  11   4   0  186.08   33.70
  11   4   0  117.39   18.90
  12   4   0  147.39   20.80
  12   4   0  104.79   19.50
  12   4   0  123.09   21.20
  13   4   0   21.20   13.70
  13   4   0   24.10   13.40
  13   4   0    8.70   14.90
  15  -5   0   98.29   22.10
  14  -5   0    4.00    9.90
  14  -5   0    8.30   10.00
 -14   5   0   16.90   10.70
  13  -5   0   10.50    8.70
  13  -5   0  -14.90    7.20
 -13   5   0   12.20    9.80
  12  -5   0   81.59   14.90
  12  -5   0   43.60   10.40
 -12   5   0   59.59   13.80
  11  -5   0   57.59   12.00
  11  -5   0   73.19   13.20
 -11   5   0   88.49   15.40
  10  -5   0  365.96   23.90
  10  -5   0  433.36   26.10
 -10   5   0  461.85   28.80
   9  -5   0   96.89   11.50
   9  -5   0  105.09   12.10
  -9   5   0   93.99   12.60
   8  -5   0   58.19   13.80
   8  -5   0   41.40    8.00
  -8   5   0   46.00    9.40
   7  -5   0   33.00    7.10
   7  -5   0   35.00    6.30
  -7   5   0   41.10    8.90
   6  -5   0  339.97   17.00
   6  -5   0  337.07   18.00
  -6   5   0  316.47   18.90
   5  -5   0  431.66   21.50
   5  -5   0  470.55   18.70
   5  -5   0  471.95   20.60
  -5   5   0  458.45   22.70
  -5   5   0  461.65   21.70
   4  -5   0   17.70    5.00
   4  -5   0   17.90    4.40
   4  -5   0   13.60    3.10
   4  -5   0   13.80    3.80
  -4   5   0   20.30    5.10
  -4   5   0   19.60    4.80
   3  -5   0   45.40    6.00
   3  -5   0   49.30    4.30
   3  -5   0   48.50    4.90
   3  -5   0   48.40    5.60
  -3   5   0   45.00    5.70
  -3   5   0   37.20    5.30
   2  -5   0   70.39    3.90
   2  -5   0   67.89    6.40
   2  -5   0   64.69    4.50
   2  -5   0   71.99    6.40
  -2   5   0   75.79    6.60
  -2   5   0   80.89    6.70
   1  -5   0  335.17   13.80
   1  -5   0  323.77    8.50
   1  -5   0  324.37    8.30
   1  -5   0  311.97   12.60
  -1   5   0  343.37   13.50
  -1   5   0  306.17   13.40
   0  -5   0  188.58   10.20
   0  -5   0  197.38    8.80
   0  -5   0  186.68    5.80
   0   5   0  182.18    5.30
   0   5   0  180.28    9.20
   0   5   0  164.58    9.50
  -1  -5   0  342.07   11.60
  -1  -5   0  330.37   14.60
  -1  -5   0  356.56   12.60
   1   5   0  331.47   13.60
   1   5   0  303.67   16.20
   1   5   0  338.57   10.90
  -2  -5   0   85.19    6.60
  -2  -5   0  104.49    8.10
   2   5   0   90.59    7.10
   2   5   0   87.99    6.40
   2   5   0   92.49    7.50
   2   5   0   97.99    7.70
  -3  -5   0   48.60    6.50
  -3  -5   0   42.30    6.40
   3   5   0   47.30    6.80
   3   5   0   38.10    6.20
   3   5   0   51.59    6.10
   3   5   0   59.19    6.40
  -4  -5   0  259.47   15.40
  -4  -5   0  308.87   17.10
   4   5   0  308.87   15.80
   4   5   0  286.27   15.60
   4   5   0  271.77   15.90
  -5  -5   0   54.99    8.50
  -5  -5   0   41.20    7.60
   5   5   0   48.40    7.70
  -6  -5   0  166.28   15.40
   6   5   0  176.78   14.30
   6   5   0  175.88   14.20
  -7  -5   0   37.30    9.50
   7   5   0   49.10   10.70
   8   5   0   37.90    9.20
   8   5   0   52.09   10.50
   9   5   0    9.50    6.90
   9   5   0    7.80    8.00
  10   5   0  235.28   22.00
  10   5   0  223.18   22.10
  11   5   0   69.29   14.00
  11   5   0  124.89   20.90
  12   5   0   38.00   14.70
  12   5   0   14.30   13.20
  15  -6   0   80.39   17.90
 -15   6   0   53.19   16.00
  14  -6   0  119.49   20.30
  14  -6   0  107.19   20.20
 -14   6   0  142.09   24.10
  13  -6   0   15.30    8.70
  13  -6   0   20.00   10.00
 -13   6   0   10.90    9.90
  12  -6   0    3.90    6.80
  12  -6   0    0.80    7.50
 -12   6   0   10.60    8.70
  11  -6   0  349.37   25.00
  11  -6   0  381.96   26.30
 -11   6   0  355.56   27.80
  10  -6   0  174.98   16.80
  10  -6   0  165.88   16.80
 -10   6   0  190.88   19.00
   9  -6   0   81.89   10.90
   9  -6   0   66.69   10.10
  -9   6   0   74.69   11.70
   8  -6   0    3.10    4.20
   8  -6   0    1.00    3.30
  -8   6   0   12.60    5.90
   7  -6   0   98.79    9.30
   7  -6   0   84.89   10.30
  -7   6   0  101.39   11.60
   6  -6   0  567.04   25.40
   6  -6   0  627.44   24.00
   6  -6   0  588.24   25.60
  -6   6   0  603.94   27.40
   5  -6   0  399.66   20.80
   5  -6   0  405.76   19.70
   5  -6   0  378.16   16.40
   5  -6   0  401.86   18.80
  -5   6   0  388.66   20.10
   4  -6   0  363.86   15.70
   4  -6   0  374.46   17.80
   4  -6   0  354.26   14.30
  -4   6   0  392.66   18.40
   3  -6   0  133.59    7.60
   3  -6   0  137.39    6.80
   3  -6   0  126.89    9.80
   3  -6   0  126.79    9.40
  -3   6   0  126.09    9.70
  -3   6   0  132.79   10.00
   2  -6   0 5082.09  117.59
   2  -6   0 5129.99  108.89
   2  -6   0 5139.69  110.09
   2  -6   0 5128.39  116.39
  -2   6   0 5330.47  122.39
  -2   6   0 5044.40  117.99
   1  -6   0 1061.09   30.20
   1  -6   0 1067.99   32.50
  -1   6   0 1118.99   31.80
   0  -6   0   69.19    5.50
   0  -6   0   68.69    6.50
   0   6   0   65.09    6.20
  -1  -6   0 1122.09   28.10
  -1  -6   0 1176.98   34.70
   1   6   0 1123.19   27.10
   1   6   0 1141.49   35.70
   1   6   0 1074.89   31.30
   1   6   0 1072.59   33.40
  -2  -6   0 3642.64   88.79
  -2  -6   0 3747.32   84.19
   2   6   0 3706.13   87.09
   2   6   0 3480.65   87.59
   2   6   0 3715.03   86.59
   2   6   0 3587.84   82.39
  -3  -6   0 1543.45   45.40
  -3  -6   0 1423.66   41.60
   3   6   0 1429.36   40.20
   3   6   0 1472.75   42.80
  -4  -6   0   93.69    9.70
  -4  -6   0   84.89   10.20
   4   6   0   92.49   16.90
   4   6   0   84.89    8.80
   4   6   0  109.49    9.60
  -5  -6   0   73.09   10.90
   5   6   0   78.99    9.00
   5   6   0   67.69    9.20
  -6  -6   0  518.05   28.90
   6   6   0  543.75   24.90
   6   6   0  576.24   26.90
  -7  -6   0  340.57   24.00
   7   6   0  359.66   22.50
   7   6   0  329.77   21.20
   8   6   0   11.90    7.30
   8   6   0    0.80    7.10
   9   6   0   53.69   12.50
   9   6   0   36.80   11.50
  10   6   0   84.69   16.70
  10   6   0  131.79   18.60
  11   6   0   52.59   16.80
  11   6   0  111.29   20.90
  15  -7   0   20.20   13.30
 -15   7   0   14.90   12.80
  14  -7   0   47.70   14.80
  14  -7   0   33.80   14.00
 -14   7   0   39.70   15.00
  13  -7   0   -8.50    8.10
  13  -7   0   12.30   10.00
 -13   7   0   -8.40    8.80
  12  -7   0    9.50    7.70
  12  -7   0   -2.30    6.10
 -12   7   0   -4.30    7.70
  11  -7   0   16.30    6.20
  11  -7   0   21.40    8.50
 -11   7   0   23.50    9.70
  10  -7   0    3.20    4.80
  10  -7   0   12.20    7.30
 -10   7   0   12.50    7.70
   9  -7   0    7.50    4.60
   9  -7   0   17.70    6.60
  -9   7   0   25.70    8.30
   8  -7   0   43.10    8.10
   8  -7   0   44.50    8.80
  -8   7   0   39.90   10.70
   7  -7   0   -0.50    3.00
   7  -7   0   -3.70    2.70
  -7   7   0    0.20    3.70
   6  -7   0    5.30    5.00
   6  -7   0    2.00    2.80
   6  -7   0    0.40    2.50
  -6   7   0    0.40    3.80
   5  -7   0  201.48   13.30
   5  -7   0  211.58   15.50
   5  -7   0  229.88   11.80
   5  -7   0  222.78   14.70
  -5   7   0  249.68   15.60
   4  -7   0   53.09    8.20
   4  -7   0   40.30    5.90
   4  -7   0   46.60    7.00
   4  -7   0   44.00    7.80
  -4   7   0   55.29    7.10
   3  -7   0    1.70    1.50
   3  -7   0   -4.40    1.90
   3  -7   0    1.70    2.20
   3  -7   0    1.50    3.70
  -3   7   0   -2.70    2.40
   2  -7   0   42.20    6.70
   2  -7   0   42.70    6.30
   2  -7   0   37.80    2.70
   2  -7   0   36.90    2.40
  -2   7   0   37.50    6.20
   1  -7   0   12.80    3.90
   1  -7   0    7.70    3.20
  -1   7   0    3.00    3.20
  -1   7   0   14.80    4.10
   0  -7   0   91.69    8.40
   0  -7   0   91.49    6.90
   0   7   0   89.39    8.70
   0   7   0   98.39    8.10
  -1  -7   0  287.77   15.40
   1   7   0  267.47   15.20
   1   7   0  277.57    8.50
   1   7   0  257.67   13.40
   1   7   0  261.47   12.80
  -2  -7   0   50.89    7.10
   2   7   0   40.50    6.70
   2   7   0   37.80    6.80
   2   7   0   37.70    4.70
   2   7   0   37.90    4.30
  -3  -7   0  118.39   11.60
   3   7   0  140.59   12.50
   3   7   0  149.69   11.40
   3   7   0  136.59    8.70
  -4  -7   0   86.49   10.80
   4   7   0   89.59   10.20
   4   7   0   84.59   10.00
   4   7   0   91.19    8.60
  -5  -7   0   51.69    9.20
   5   7   0   45.70    9.20
   5   7   0   39.10    7.30
  -6  -7   0  244.68   19.10
   6   7   0  240.78   18.20
   6   7   0  224.08   16.10
  -7  -7   0  238.68   21.20
   7   7   0  211.98   16.90
   7   7   0  198.68   18.50
   8   7   0    0.00    7.10
   8   7   0   -1.60    6.60
   9   7   0   27.40   10.20
   9   7   0   10.60   11.20
  10   7   0   20.30   16.30
  10   7   0   49.30   12.70
  11   7   0   65.09   25.90
  15  -8   0   33.60   13.80
  15  -8   0    9.60   13.10
 -15   8   0    8.90   15.40
  14  -8   0    8.40   10.90
  14  -8   0    2.80    9.30
 -14   8   0    6.20   10.70
  13  -8   0    6.90   10.20
  13  -8   0   23.90    9.90
 -13   8   0   12.50    9.30
  12  -8   0  315.57   25.00
 -12   8   0  300.87   27.10
  11  -8   0  116.49   15.60
  11  -8   0   98.99   14.90
 -11   8   0  126.39   17.80
  10  -8   0   99.39   14.30
  10  -8   0   84.49   12.20
 -10   8   0   80.09   15.00
   9  -8   0   89.19   11.10
   9  -8   0   87.69   12.30
  -9   8   0   84.69   12.70
   8  -8   0  539.45   28.20
   8  -8   0  529.75   24.70
  -8   8   0  520.85   29.00
   7  -8   0  344.47   18.10
   7  -8   0  387.16   22.00
  -7   8   0  379.26   23.00
   6  -8   0   20.50    6.70
   6  -8   0   20.20    6.30
   6  -8   0   19.40    4.80
  -6   8   0   17.40    6.10
   5  -8   0  302.27   13.80
   5  -8   0  295.37   15.60
   5  -8   0  312.77   18.40
  -5   8   0  315.57   18.70
   4  -8   0  620.34   19.40
   4  -8   0  620.54   26.30
   4  -8   0  610.94   26.20
   4  -8   0  650.53   21.50
  -4   8   0  647.04   26.20
   3  -8   0 1535.75   35.40
   3  -8   0 1489.95   36.20
   3  -8   0 1484.65   45.60
   3  -8   0 1473.35   52.79
  -3   8   0 1533.55   45.40
   2  -8   0   53.19    7.20
   2  -8   0   51.39    7.10
  -2   8   0   54.59    7.10
   1  -8   0  924.31   32.60
   1  -8   0  950.50   28.80
  -1   8   0  990.80   31.50
   0  -8   0  755.92   24.40
   0  -8   0  856.51   30.00
   0   8   0  819.72   27.80
  -1  -8   0 1242.78   40.50
   1   8   0 1289.37   38.30
   1   8   0 1214.18   36.10
  -2  -8   0    2.10    3.20
   2   8   0    2.70    2.60
   2   8   0    2.70    2.20
   2   8   0    6.30    4.40
  -3  -8   0  275.37   17.50
   3   8   0  234.28   15.10
   3   8   0  223.08   11.60
   3   8   0  225.98   10.90
   3   8   0  231.18   15.20
  -4  -8   0  365.86   21.40
   4   8   0  330.97   15.80
   4   8   0  344.27   19.40
  -5  -8   0  204.18   17.90
   5   8   0  221.58   13.90
   5   8   0  202.68   16.30
  -6  -8   0   13.30    7.60
   6   8   0   -1.80    5.20
  -7  -8   0   14.60    9.70
   7   8   0    9.30    8.80
   7   8   0    4.70    7.00
   8   8   0   10.50    9.20
   8   8   0    5.80   10.50
   9   8   0   11.50    9.80
   9   8   0   -4.20   10.90
  10   8   0  -24.20   11.60
  10   8   0  -16.90   14.40
  15  -9   0   15.40   13.90
 -15   9   0    8.60   14.40
  14  -9   0   -9.30   10.50
 -14   9   0   20.80   11.80
  13  -9   0   12.10    8.70
  13  -9   0   -8.20    9.70
 -13   9   0    1.30   10.30
  12  -9   0   20.20   11.10
  12  -9   0   20.90    8.80
 -12   9   0   31.60   13.10
  11  -9   0   72.09   13.10
  11  -9   0   46.20   11.70
 -11   9   0   41.70   13.00
  10  -9   0    9.20    6.30
  10  -9   0    4.30    6.10
 -10   9   0    1.30    7.70
   9  -9   0  104.79   12.20
   9  -9   0   87.19   13.10
  -9   9   0   52.69   12.90
   8  -9   0   91.09   10.80
   8  -9   0   88.29   12.50
  -8   9   0   91.39   13.20
   7  -9   0    8.30    4.30
   7  -9   0    5.40    3.20
  -7   9   0    5.10    6.40
   6  -9   0   47.50    9.00
   6  -9   0   47.10    6.40
   6  -9   0   44.60    8.30
  -6   9   0   67.39   10.10
   5  -9   0   25.90    5.90
   5  -9   0   24.00    4.80
   5  -9   0   18.40    6.30
  -5   9   0   20.40    6.00
   4  -9   0   -1.60    5.90
   4  -9   0    2.80    3.60
   4  -9   0    3.70    2.20
   4  -9   0    3.00    3.20
  -4   9   0   -1.70    4.00
   3  -9   0   34.40    7.70
   3  -9   0   42.40    8.00
  -3   9   0   24.10    6.20
   2  -9   0    1.20    4.60
   2  -9   0    1.80    3.60
  -2   9   0    4.80    4.10
   1  -9   0  118.19   10.90
   1  -9   0  101.69    8.80
  -1   9   0   96.19    9.20
   0  -9   0  178.38   13.00
   0  -9   0  134.19    9.40
   0   9   0  135.99   10.90
  -1  -9   0   -1.80    3.70
   1   9   0   -3.90    3.90
   1   9   0    0.80    4.50
  -2  -9   0   -2.60    4.50
   2   9   0    3.90    1.30
   2   9   0    0.80    4.10
  -3  -9   0   32.50    9.10
   3   9   0   49.00    5.30
   3   9   0   55.79    6.50
   3   9   0   45.00    9.20
  -4  -9   0   34.80    9.00
   4   9   0   33.10    6.30
   4   9   0   59.59   10.60
  -5  -9   0   94.59   14.40
   5   9   0   63.59   12.90
  -6  -9   0   78.29   15.20
   6   9   0   82.99   10.80
   6   9   0   82.39   14.60
   7   9   0    8.60   10.10
   7   9   0   -3.80    7.40
   8   9   0   -2.70   12.20
   8   9   0   -1.80    8.80
   9   9   0   62.79   15.50
   9   9   0   54.49   17.80
  15 -10   0   45.00   17.50
  14 -10   0  124.99   22.40
 -14  10   0  111.79   21.80
  13 -10   0  137.59   21.00
 -13  10   0  174.68   23.40
  12 -10   0   27.50   11.50
  12 -10   0   20.70    9.10
 -12  10   0   19.20   11.00
  11 -10   0  251.97   20.70
  11 -10   0  337.77   37.40
 -11  10   0  293.77   25.00
  10 -10   0  553.94   28.60
  10 -10   0  584.04   32.90
 -10  10   0  532.35   33.40
   9 -10   0  515.85   30.60
   9 -10   0  625.54   28.10
  -9  10   0  499.75   31.70
   8 -10   0   57.19    8.90
   8 -10   0   59.69   10.90
  -8  10   0   48.20   10.40
   7 -10   0  389.86   23.80
   7 -10   0  376.76   18.20
   6 -10   0  615.24   25.30
   6 -10   0  612.44   22.40
   6 -10   0  665.03   30.10
  -6  10   0  650.23   30.30
   5 -10   0  290.37   14.00
   5 -10   0  292.17   19.20
   5 -10   0  269.97   13.70
  -5  10   0  265.77   18.10
   4 -10   0   10.90    4.20
   4 -10   0   12.30    2.40
   4 -10   0    4.00    4.40
  -4  10   0   10.70    5.70
   3 -10   0  685.43   29.60
   3 -10   0  579.14   24.80
  -3  10   0  636.84   26.60
   2 -10   0  342.97   20.30
   2 -10   0  354.96   17.10
  -2  10   0  347.27   18.00
   1 -10   0    2.40    4.30
  -1  10   0   -0.30    4.40
   0 -10   0   -2.90    4.00
   0  10   0   -4.90    4.00
  -1 -10   0   44.10   13.90
   1  10   0   35.20    8.00
   1  10   0   41.90   10.10
  -2 -10   0   41.60    9.00
   2  10   0   38.70    8.30
  -3 -10   0   12.90    8.10
   3  10   0   13.00    6.80
  -4 -10   0   25.50    8.80
   4  10   0   18.30    8.70
  -5 -10   0  -10.70    7.80
   5  10   0    5.80    8.80
   6  10   0    0.10   10.00
   6  10   0   -9.60    7.10
   7  10   0   -6.30   12.00
  14 -11   0    0.40   12.90
  14 -11   0   38.40   16.40
 -14  11   0   20.00   15.00
  13 -11   0   45.10   13.70
  13 -11   0   20.70   10.80
 -13  11   0   28.50   13.80
  12 -11   0   74.99   15.10
  12 -11   0   69.79   15.40
 -12  11   0   96.79   19.60
  11 -11   0   11.50    8.70
  11 -11   0   29.40    9.10
 -11  11   0   28.60   11.10
  10 -11   0   62.79   12.90
  10 -11   0   87.49   13.30
 -10  11   0   68.69   14.90
   9 -11   0   64.39   11.10
   9 -11   0   47.20   10.90
  -9  11   0   85.09   16.80
   8 -11   0   68.79   12.20
   8 -11   0   49.80    9.20
  -8  11   0   66.19   13.90
   7 -11   0   47.30    8.00
   7 -11   0   62.19   12.30
  -7  11   0   47.70   11.10
   6 -11   0    1.00    5.40
   6 -11   0    2.50    6.40
   6 -11   0    7.80    4.00
  -6  11   0   -3.80    6.80
   5 -11   0    2.50    4.80
   5 -11   0   12.10    5.60
   5 -11   0    3.00    2.80
  -5  11   0    0.40    5.80
   4 -11   0   10.70    6.20
  -4  11   0   16.80    6.40
   3 -11   0   27.10    7.60
   3 -11   0   23.00    8.20
  -3  11   0   44.20    8.50
   2 -11   0   80.69   11.30
   2 -11   0   71.19    9.80
  -2  11   0   71.89    9.90
   1 -11   0  220.88   16.80
   1 -11   0  201.08   12.70
  -1  11   0  226.48   14.70
   0 -11   0  170.68   15.50
   0  11   0  150.68   12.50
  -1 -11   0   53.69   10.60
  -2 -11   0  184.18   17.20
  -3 -11   0  153.58   17.80
   3  11   0  141.99   14.90
  -4 -11   0  122.99   17.20
   4  11   0  122.49   15.90
  -5 -11   0    1.20   12.40
   5  11   0   23.80   11.40
  -6 -11   0   60.59   16.00
  -7 -11   0   12.70   17.30
  14 -12   0   19.70   17.60
 -14  12   0   27.60   16.40
  13 -12   0  160.98   24.70
 -13  12   0  166.98   24.80
  12 -12   0  108.89   21.80
  12 -12   0   62.29   13.90
 -12  12   0   91.09   18.60
  11 -12   0  -11.40    8.20
  11 -12   0   -5.50    8.70
 -11  12   0  -12.60    9.40
  10 -12   0    1.40    9.40
 -10  12   0    1.10   10.40
   9 -12   0   25.50   11.10
   9 -12   0   32.00    9.30
  -9  12   0   36.10   10.80
   8 -12   0   64.29   10.70
   8 -12   0   82.69   15.50
  -8  12   0   81.69   15.20
   7 -12   0   11.30    8.10
   7 -12   0   28.40    6.10
   7 -12   0   25.80   10.10
  -7  12   0   40.60   10.60
   6 -12   0   34.80    6.20
   6 -12   0   32.90    9.60
   6 -12   0   34.50    7.70
  -6  12   0   43.60   10.90
   5 -12   0   21.10    8.50
  -5  12   0   21.10    8.00
   4 -12   0  313.57   21.40
  -4  12   0  316.37   20.10
   3 -12   0  207.58   17.70
  -3  12   0  168.88   14.10
   2 -12   0   21.90    7.20
   2 -12   0   31.10    8.60
  -2  12   0   32.70    9.30
   1 -12   0   34.70    9.50
   0 -12   0   80.89   12.10
   0  12   0  114.19   17.30
  -1 -12   0  175.08   17.70
  -2 -12   0   44.70   11.80
   3  12   0   14.00   11.00
  -5 -12   0   72.49   17.30
  -6 -12   0   32.70   18.80
  13 -13   0  -10.30   14.60
 -13  13   0   12.70   15.90
  12 -13   0   15.10   12.20
 -12  13   0   12.00   14.00
  11 -13   0    6.50   10.20
  11 -13   0   10.30   10.10
 -11  13   0   20.90   13.90
  10 -13   0   26.50   12.10
 -10  13   0   13.80   12.20
   9 -13   0    1.60    8.50
  -9  13   0   19.50   11.40
   8 -13   0   -4.20    7.10
  -8  13   0   32.40   10.70
   7 -13   0   14.00    8.50
  -7  13   0   11.80   10.20
   6 -13   0    6.50    7.70
  -6  13   0   -1.60    8.00
   5 -13   0   -1.20    7.20
  -5  13   0   -2.50    7.30
   4 -13   0   12.10    7.50
  -4  13   0   12.60    7.10
   3 -13   0   18.70    7.90
  -3  13   0   25.10    8.10
   2 -13   0   -1.80    6.60
   1 -13   0   -1.30    7.30
   0 -13   0   30.10    9.70
   0  13   0   38.10    8.70
  -3 -13   0    5.00   12.70
  -4 -13   0  100.69   20.10
  12 -14   0  -16.90   16.20
  12 -14   0  -12.70   14.80
 -12  14   0   -6.50   15.00
  11 -14   0   22.00   13.50
  11 -14   0   16.30   11.90
 -11  14   0   53.19   17.30
  10 -14   0   28.50   12.10
  10 -14   0   60.29   13.00
 -10  14   0    9.60   12.80
   9 -14   0   12.80   10.30
  -9  14   0   -3.30   11.50
   8 -14   0    6.70    9.10
  -8  14   0   19.40   10.70
   7 -14   0   16.60   10.80
  -7  14   0   27.80   10.60
   6 -14   0   91.79   16.60
  -6  14   0   65.09   13.00
   5 -14   0   44.60   11.40
  -5  14   0   30.90   10.20
   4 -14   0   -3.20    8.00
  -4  14   0    7.30    8.30
   3 -14   0  109.19   16.00
  -3  14   0   69.79   12.80
   2 -14   0  183.68   19.40
  -1 -14   0  134.69   21.80
  -2 -14   0  156.98   24.60
  -3 -14   0   41.20   19.10
  11 -15   0   19.00   14.30
 -11  15   0    2.30   15.60
  10 -15   0   -6.70   11.70
 -10  15   0   17.30   15.10
   9 -15   0   28.50   13.30
  -9  15   0    0.70   13.10
   8 -15   0   -6.50   10.50
  -8  15   0    7.90   13.30
   7 -15   0   19.00   11.00
  -7  15   0   15.40   12.30
   6 -15   0   40.50   12.90
  -6  15   0    6.50   11.40
   5 -15   0  -14.10   10.80
   4 -15   0    9.20   10.50
   3 -15   0   19.90   13.90
   2 -15   0   -6.40   12.80
   1 -15   0   10.50   12.00
   0 -15   0   -0.70   13.20
  -1 -15   0   39.00   18.20
   8 -16   0  182.58   25.90
   7 -16   0  136.09   23.00
   6 -16   0    6.30   12.00
   4 -16   0  234.48   25.50
   3 -16   0   63.59   18.10
   2 -16   0    9.70   13.80
   2 -16   1   42.90   17.10
   3 -16   1   78.39   18.90
   4 -16   1   21.30   14.30
   5 -16   1    6.90   12.20
   7 -16   1   34.50   13.80
   8 -16   1   -5.10   12.70
  -9  16  -1  -22.10   20.20
   9 -16   1   11.70   14.60
  -1 -15   1  108.39   25.30
   0 -15   1   28.00   15.00
   1 -15   1   18.20   13.10
   2 -15   1   39.80   12.90
   3 -15   1  107.89   19.00
   4 -15   1   58.79   15.50
  -5  15  -1    5.80   11.80
   5 -15   1   29.20   13.00
  -6  15  -1   13.60   12.10
   6 -15   1   -5.70    9.00
  -7  15  -1  153.88   21.00
   7 -15   1  201.38   23.10
  -8  15  -1  216.48   24.40
   8 -15   1  220.08   23.00
  -9  15  -1   47.70   16.90
   9 -15   1   62.59   16.10
 -10  15  -1   10.10   14.60
  10 -15   1  -16.40   11.80
  11 -15   1  148.59   24.40
  -3 -14   1   14.20   18.50
  -2 -14   1    2.00   14.10
  -1 -14   1   11.30   13.90
  -2  14  -1    7.20    9.00
  -3  14  -1    9.00    9.60
   3 -14   1   -3.70    7.90
  -4  14  -1    1.80    8.90
   4 -14   1   -3.80    7.60
  -5  14  -1   18.20    9.80
   5 -14   1   33.40   11.30
  -6  14  -1    7.80    9.40
   6 -14   1   -4.60    7.90
  -7  14  -1    8.60   10.20
   7 -14   1   26.70   17.10
  -8  14  -1    5.10   11.30
   8 -14   1   18.80    9.80
  -9  14  -1   20.20   12.20
   9 -14   1    8.60   10.30
  10 -14   1   -3.60   10.90
  10 -14   1    2.40   10.60
 -11  14  -1   -0.20   14.20
  11 -14   1   16.10   13.40
  11 -14   1   -9.80   10.70
 -12  14  -1   18.00   15.00
  12 -14   1    4.00   14.30
  -4 -13   1    7.60   16.10
  -3 -13   1  131.59   29.00
  -2 -13   1  105.49   18.90
   1  13  -1   48.00   10.40
  -1 -13   1   41.30   10.50
   0  13  -1   24.50    8.70
   0 -13   1   27.80    9.10
  -1  13  -1  116.59   13.60
   1 -13   1  101.19   15.30
  -2  13  -1   90.59   12.70
   2 -13   1   68.99   13.70
  -3  13  -1   20.10    7.30
   3 -13   1    6.00    7.30
  -4  13  -1    3.50    7.80
   4 -13   1   28.40    7.90
  -5  13  -1   22.60    9.40
   5 -13   1   35.60    9.40
  -6  13  -1  102.49   15.10
   6 -13   1  157.78   17.80
  -7  13  -1  155.38   18.30
   7 -13   1  121.89    9.90
   7 -13   1  137.09   16.80
  -8  13  -1   82.89   16.20
   8 -13   1   86.49   14.90
  -9  13  -1    8.80   10.80
   9 -13   1    4.40    9.80
 -10  13  -1  152.28   21.80
  10 -13   1  122.19   20.10
 -11  13  -1  129.19   22.40
  11 -13   1  167.88   18.50
  11 -13   1  114.69   20.60
 -12  13  -1   47.40   15.30
  12 -13   1   31.60   13.50
  12 -13   1   21.50   11.80
 -13  13  -1  -19.40   14.20
  13 -13   1  -10.40   13.60
  -6 -12   1   31.80   19.40
   4  12  -1   20.20   12.80
  -4 -12   1   25.60   12.80
   3  12  -1   61.99   12.00
  -3 -12   1   45.20   11.80
   2  12  -1   66.29   11.80
  -2 -12   1   90.09   15.10
   1  12  -1  205.38   16.30
  -1 -12   1  210.78   18.60
   0  12  -1   75.69   11.70
   0 -12   1   82.79   12.60
  -1  12  -1   82.49   11.60
   1 -12   1   76.69   12.10
  -2  12  -1   40.60    8.20
   2 -12   1   64.99   11.30
  -3  12  -1   56.19   11.10
   3 -12   1   62.39   10.90
  -4  12  -1    2.50    7.20
   4 -12   1   -0.90    5.70
  -5  12  -1  120.49   14.70
   5 -12   1   97.89   13.80
  -6  12  -1   14.20    8.10
   6 -12   1    2.90    3.80
   6 -12   1    1.50    5.00
  -7  12  -1   -4.60    7.30
   7 -12   1    3.50    6.90
   7 -12   1   -0.80    9.30
   7 -12   1   -9.90    4.30
  -8  12  -1    3.80    8.50
   8 -12   1    6.70    5.70
   8 -12   1    3.50    6.10
  -9  12  -1   -3.90    8.90
   9 -12   1   -2.70    6.50
   9 -12   1   -2.40    6.90
 -10  12  -1   10.70   10.60
  10 -12   1    4.90    8.30
  11 -12   1   13.90    9.70
  11 -12   1   31.20   10.30
 -12  12  -1    2.50   12.60
  12 -12   1   -6.10    9.10
  14 -12   1  -21.70   19.60
  -7 -11   1  -21.00   15.90
   6  11  -1   34.00   14.50
  -6 -11   1   63.99   17.00
   5  11  -1   22.10   11.60
  -5 -11   1   11.30   10.80
   4  11  -1   23.90    9.60
  -4 -11   1   27.10    9.60
   3  11  -1   -1.40    8.20
  -3 -11   1    3.90    7.80
   2  11  -1   16.90    8.00
  -2 -11   1    1.10    5.90
   1  11  -1    5.40    6.50
  -1 -11   1    1.50    4.60
   0  11  -1   80.29   11.00
   0 -11   1   77.49   10.50
  -1  11  -1   33.10    7.30
   1 -11   1   23.90    7.00
   1 -11   1   43.70    8.60
  -2  11  -1   50.09    9.70
   2 -11   1   32.70    8.50
   2 -11   1   42.20   15.20
  -3  11  -1  147.89   14.00
   3 -11   1  177.38   14.90
  -4  11  -1  583.34   28.30
   4 -11   1  661.43   29.90
  -5  11  -1  375.46   22.50
   5 -11   1  386.16   22.90
   5 -11   1  348.27   11.40
   5 -11   1  342.07   12.00
  -6  11  -1    0.80    6.20
   6 -11   1    3.00    3.60
   6 -11   1    6.20    5.30
   6 -11   1    0.20    6.00
  -7  11  -1  203.48   19.00
   7 -11   1  178.88   12.40
   7 -11   1  222.78   18.10
   7 -11   1  172.48   18.20
  -8  11  -1  632.34   33.90
   8 -11   1  637.94   33.20
   8 -11   1  589.24   25.40
  -9  11  -1  191.98   20.00
   9 -11   1  173.38   16.90
   9 -11   1  198.38   19.00
 -10  11  -1   -1.50    8.70
  10 -11   1   -5.80    6.30
  10 -11   1   11.40    7.60
 -11  11  -1   43.90   14.00
  11 -11   1   53.99   15.60
  11 -11   1   24.30    9.50
 -12  11  -1  120.79   21.90
  12 -11   1  112.59   18.20
  12 -11   1   98.99   17.80
 -13  11  -1   37.00   14.60
  13 -11   1   58.09   14.10
  13 -11   1   52.89   15.20
 -14  11  -1    5.20   14.70
  14 -11   1   -6.70   12.00
  14 -11   1  -12.90   12.50
   8  10  -1  159.98   24.50
   7  10  -1   23.20   13.50
  -7 -10   1   17.60   13.40
   6  10  -1   13.30   10.50
   6  10  -1    3.20    7.50
  -6 -10   1   12.40   11.80
   5  10  -1  166.38   26.80
  -5 -10   1  110.79   16.20
   4  10  -1  374.86   22.80
   4  10  -1  361.76   12.60
  -4 -10   1  345.27   23.20
   3  10  -1   58.19   11.40
  -3 -10   1   34.70    8.80
   2  10  -1  143.69   13.50
  -2 -10   1  197.08   15.90
   1  10  -1   10.20    5.60
  -1 -10   1    7.90    5.60
   0  10  -1  189.68   13.90
   0 -10   1  219.58   15.30
   0 -10   1  185.18   12.50
  -1  10  -1  212.48   14.80
   1 -10   1  227.38   15.70
   1 -10   1  225.18   13.70
  -2  10  -1  259.87   16.20
   2 -10   1  247.18   16.20
   2 -10   1  229.58   14.60
  -3  10  -1    2.00    4.70
   3 -10   1    0.70    3.70
  -4  10  -1  152.98   14.00
   4 -10   1  137.39    5.70
   4 -10   1  181.58   15.10
  -5  10  -1   76.79   11.20
   5 -10   1   83.39    8.10
   5 -10   1  109.59   12.50
  -6  10  -1   -1.60    5.40
   6 -10   1    3.90    5.10
   6 -10   1    3.30    5.90
   6 -10   1    1.50    3.50
  -7  10  -1   31.40    8.80
   7 -10   1   22.00    5.60
   7 -10   1    8.90    5.10
  -8  10  -1    3.50    6.90
   8 -10   1   -2.30    4.40
   8 -10   1   11.70    6.40
  -9  10  -1   21.50   10.10
   9 -10   1   29.70    7.60
   9 -10   1   26.40    9.30
 -10  10  -1    2.70    7.10
  10 -10   1    4.20    6.10
  10 -10   1    1.70    6.20
 -11  10  -1   87.09   17.60
  11 -10   1  100.49   15.30
  11 -10   1  122.29   18.70
 -12  10  -1    9.70    9.10
  12 -10   1   17.20    9.20
  12 -10   1   19.00    9.50
 -13  10  -1   22.50   13.00
  13 -10   1   28.30   13.20
 -14  10  -1  -13.60   11.30
  14 -10   1    8.20   10.80
  15 -10   1    9.70   14.00
  15 -10   1   26.00   17.00
   9   9  -1    4.10   13.30
   9   9  -1   48.40   16.80
   8   9  -1   22.10    9.60
   8   9  -1   -2.00   12.00
   7   9  -1   36.90   12.20
   7   9  -1   29.10    9.70
   6   9  -1  103.09   11.60
   6   9  -1   99.89   16.20
  -6  -9   1  139.39   18.50
   5   9  -1  269.47   19.90
  -5  -9   1  268.77   20.90
   4   9  -1   41.10    9.80
   4   9  -1   43.00    9.20
   4   9  -1   36.60    6.20
   3   9  -1  116.49    7.30
   3   9  -1  144.09   13.80
   3   9  -1  136.09    7.10
  -3  -9   1  126.89   12.90
   2   9  -1  151.48   12.50
  -2  -9   1  138.59   12.70
   1   9  -1  142.99   11.90
   1   9  -1  160.88   12.10
  -1  -9   1  139.89   11.70
   0   9  -1   21.70    6.00
   0  -9   1   18.40    5.20
   0  -9   1   38.60    7.50
  -1   9  -1  502.15   21.90
   1  -9   1  492.45   22.20
   1  -9   1  445.66   19.40
  -2   9  -1  259.97   16.00
   2  -9   1  275.47   16.10
   2  -9   1  239.88   14.40
  -3   9  -1  517.15   24.00
   3  -9   1  535.85   23.60
   3  -9   1  535.65   24.10
  -4   9  -1   30.60    7.20
   4  -9   1   35.40    7.50
   4  -9   1   27.30    4.00
   4  -9   1   28.80    3.70
  -5   9  -1  603.04   28.00
   5  -9   1  566.94   26.40
   5  -9   1  593.74   20.00
   5  -9   1  559.54   21.30
  -6   9  -1  701.93   32.10
   6  -9   1  677.13   27.10
   6  -9   1  669.13   24.20
   6  -9   1  683.83   30.40
  -7   9  -1  843.02   38.40
   7  -9   1  850.91   30.10
   7  -9   1  812.22   35.40
  -8   9  -1   31.30    9.50
   8  -9   1   33.90    7.50
   8  -9   1   40.80   10.00
  -9   9  -1  641.54   34.50
   9  -9   1  629.94   32.60
   9  -9   1  649.64   29.40
 -10   9  -1  269.27   23.90
  10  -9   1  291.97   20.60
  10  -9   1  281.97   22.80
 -11   9  -1  115.39   17.30
  11  -9   1  141.09   17.20
  11  -9   1  115.59   15.20
  12  -9   1   41.90   11.40
  12  -9   1   57.49   13.70
 -13   9  -1  160.78   23.20
  13  -9   1  142.29   20.90
  13  -9   1  189.58   21.40
 -14   9  -1   47.20   14.80
 -15   9  -1   33.40   15.50
  15  -9   1   35.50   14.70
  10   8  -1   77.69   17.70
   9   8  -1   34.90   13.20
   9   8  -1   39.90   11.40
   8   8  -1    3.50    9.80
   8   8  -1   -7.00    7.50
   7   8  -1   14.20    7.80
   7   8  -1   18.50    9.50
  -7  -8   1   18.00    9.80
   6   8  -1  232.48   19.50
   6   8  -1  217.88   15.10
  -6  -8   1  198.38   19.20
   5   8  -1   68.89   11.00
   5   8  -1   59.79    8.10
   4   8  -1   65.89   10.10
   4   8  -1   66.79    7.10
  -4  -8   1   71.39   10.30
   3   8  -1    2.90    4.60
   3   8  -1    3.50    3.60
  -3  -8   1    3.20    4.40
   2   8  -1    3.40    4.50
   2   8  -1    5.70    5.80
   2   8  -1   -0.50    1.80
   2   8  -1    4.20    2.10
  -2  -8   1    0.30    3.50
   1   8  -1   32.10    6.40
  -1  -8   1   24.00    5.70
   0   8  -1   66.29    8.10
   0  -8   1   58.09    7.00
   0  -8   1   82.99    8.50
  -1   8  -1    8.90    4.60
   1  -8   1   16.50    4.30
   1  -8   1    9.70    3.70
  -2   8  -1   34.30    6.50
   2  -8   1   35.40    6.40
   2  -8   1   41.30    7.30
  -3   8  -1    1.20    3.20
   3  -8   1    6.60    3.80
   3  -8   1    1.70    4.70
   3  -8   1    2.70    1.60
   3  -8   1   -0.70    1.80
  -4   8  -1   63.79    8.50
   4  -8   1   78.39    5.80
   4  -8   1   55.49    9.60
   4  -8   1   61.89    6.40
   4  -8   1   75.99    8.70
  -5   8  -1   38.00    8.50
   5  -8   1   29.60    5.10
   5  -8   1   35.00    6.90
   5  -8   1   29.80    5.90
  -6   8  -1   -0.60    4.20
   6  -8   1    0.80    4.80
   6  -8   1    5.00    3.20
   6  -8   1    0.90    3.40
  -7   8  -1    2.00    5.20
   7  -8   1   12.00    4.90
   7  -8   1    8.70    4.50
  -8   8  -1   46.10   10.20
   8  -8   1   51.09    8.50
   8  -8   1   52.89    9.80
  -9   8  -1   22.70    9.60
   9  -8   1   13.20    5.80
   9  -8   1   14.10    6.20
 -10   8  -1    1.50    6.40
  10  -8   1    2.80    4.90
  10  -8   1    1.10    5.30
 -11   8  -1   -1.60    7.50
  11  -8   1   -6.30    6.20
  11  -8   1    2.30    6.20
 -12   8  -1   42.20   12.10
  12  -8   1   38.40   11.40
 -13   8  -1    4.00   10.70
  13  -8   1    8.50    9.70
  13  -8   1   -6.50    7.80
 -14   8  -1   80.59   19.60
  14  -8   1  111.59   20.80
  14  -8   1  104.09   23.70
 -15   8  -1   51.09   17.10
  15  -8   1   49.80   15.40
  15  -8   1   84.29   20.00
  10   7  -1    9.20   10.40
  10   7  -1   -6.90   19.70
   9   7  -1   64.09   14.40
   9   7  -1   82.39   15.10
   8   7  -1   62.19   11.80
   8   7  -1   73.69   15.10
   7   7  -1   35.20    8.80
   7   7  -1   35.80   10.60
  -7  -7   1   46.00   10.80
   6   7  -1    3.60    4.70
   6   7  -1   -0.60    5.20
  -6  -7   1    0.30    6.10
   5   7  -1  504.95   21.60
   5   7  -1  508.65   25.00
  -5  -7   1  472.65   25.50
   4   7  -1 1018.00   36.30
   4   7  -1  995.40   31.20
  -4  -7   1 1026.20   37.20
   3   7  -1  265.27   15.70
   3   7  -1  283.87   12.30
   3   7  -1  304.27   16.90
  -3  -7   1  317.27   17.30
   2   7  -1   72.49    5.10
   2   7  -1   75.69    8.70
   2   7  -1   77.99    5.40
   2   7  -1   60.79    7.70
  -2  -7   1   79.79    8.20
   1   7  -1 1013.10   32.70
   1   7  -1 1057.09   22.80
   1   7  -1 1098.19   34.00
   1   7  -1 1017.70   22.80
  -1  -7   1 1069.79   30.90
  -1  -7   1 1085.99   33.80
   0   7  -1 1386.26   40.70
   0   7  -1 1503.25   41.90
   0  -7   1 1399.26   38.50
   0  -7   1 1413.26   40.90
  -1   7  -1   15.10    4.20
  -1   7  -1   15.80    4.40
   1  -7   1    7.50    3.20
   1  -7   1    4.60    3.50
  -2   7  -1   11.60    7.10
  -2   7  -1   16.00    4.70
   2  -7   1   17.90    4.90
   2  -7   1   17.20    4.10
  -3   7  -1  151.68   11.10
   3  -7   1  135.49    6.50
   3  -7   1  137.29   10.20
   3  -7   1  141.49   11.30
   3  -7   1  133.99    7.30
  -4   7  -1  161.48   12.20
   4  -7   1  203.58   14.00
   4  -7   1  197.08   10.50
   4  -7   1  197.68   12.90
  -5   7  -1    2.10    3.50
   5  -7   1    3.90    3.40
   5  -7   1    0.30    3.50
   5  -7   1    3.40    2.50
  -6   7  -1   78.69   10.60
   6  -7   1   78.99    7.90
   6  -7   1   73.69   10.00
   6  -7   1   80.59    9.30
  -7   7  -1  396.26   23.60
   7  -7   1  369.86   19.30
   7  -7   1  411.56   22.40
  -8   7  -1  305.27   21.60
   8  -7   1  270.57   17.30
   8  -7   1  267.77   18.80
  -9   7  -1  217.78   19.10
   9  -7   1  206.38   16.40
   9  -7   1  173.18   16.20
 -10   7  -1  247.58   22.00
  10  -7   1  258.07   19.10
  10  -7   1  244.18   20.00
 -11   7  -1   10.50    7.90
  11  -7   1    6.60    6.00
  11  -7   1   10.60    7.40
 -12   7  -1  192.88   22.10
  12  -7   1  188.88   20.20
  12  -7   1  176.18   19.60
 -13   7  -1   68.59   16.80
  13  -7   1   57.29   15.90
  13  -7   1   41.50   11.50
 -14   7  -1   34.00   16.30
  14  -7   1   40.20   14.10
  14  -7   1   32.60   14.60
 -15   7  -1   -0.50   12.50
  15  -7   1  -10.10   11.80
  12   6  -1    7.40   15.60
  12   6  -1   -2.50   12.80
  11   6  -1  181.18   24.30
  11   6  -1  130.09   20.70
  10   6  -1   -2.20   10.60
  10   6  -1   22.70   10.50
   9   6  -1  136.19   16.90
   9   6  -1  116.09   17.80
   8   6  -1  117.59   14.10
   8   6  -1  137.49   16.70
   7   6  -1  472.55   26.40
  -7  -6   1  463.25   27.00
   6   6  -1   28.10    7.60
   6   6  -1   15.10    5.90
  -6  -6   1   33.90    8.70
   5   6  -1   50.39    8.80
   5   6  -1   50.09    7.60
  -5  -6   1   44.90    9.00
   4   6  -1   74.79   11.10
   4   6  -1   70.79    7.10
   4   6  -1   84.89    9.50
  -4  -6   1   68.79    9.00
   3   6  -1  382.46   15.40
   3   6  -1  417.06   18.40
   3   6  -1  398.86   16.40
   3   6  -1  361.66   17.90
   3   6  -1  398.86   18.50
  -3  -6   1  443.36   19.60
   2   6  -1  436.76   18.60
   2   6  -1  417.36   14.00
   2   6  -1  433.56   14.80
   2   6  -1  399.06   17.40
   2   6  -1  398.76   17.10
  -2  -6   1  443.06   18.40
   1   6  -1  222.58   12.10
   1   6  -1  229.08    7.10
   1   6  -1  230.68    8.00
   1   6  -1  201.18   11.00
  -1  -6   1  214.28   10.70
  -1  -6   1  180.58   10.80
   0   6  -1   45.20    5.00
   0   6  -1   47.30    5.80
   0  -6   1   37.20    4.90
   0  -6   1   41.70    5.00
  -1   6  -1  293.87   13.50
  -1   6  -1  272.27   13.70
   1  -6   1  293.37   13.40
   1  -6   1  277.37   13.10
  -2   6  -1   32.10    5.10
  -2   6  -1   31.50    5.30
   2  -6   1   30.20    2.80
   2  -6   1   37.70    2.50
   2  -6   1   33.70    5.20
   2  -6   1   35.10    6.00
  -3   6  -1  159.38   10.50
  -3   6  -1  158.58   11.30
   3  -6   1  153.18   11.30
   3  -6   1  164.18    8.40
   3  -6   1  148.29   10.20
   3  -6   1  160.98    7.50
  -4   6  -1   35.80    6.40
   4  -6   1   31.60    4.10
   4  -6   1   32.50    5.30
   4  -6   1   37.40    8.00
   4  -6   1   25.90    4.90
  -5   6  -1   13.80    4.60
   5  -6   1   17.20    4.30
   5  -6   1   21.80    4.40
   5  -6   1   24.00    5.70
   5  -6   1   22.70    6.80
  -6   6  -1  122.09   12.10
   6  -6   1  108.19   11.00
   6  -6   1  114.79    9.40
   6  -6   1  128.09   11.10
  -7   6  -1   92.39   11.30
   7  -6   1   92.39    9.30
   7  -6   1  103.19   11.00
   8  -6   1    5.30    4.00
   8  -6   1   11.00    5.50
  -9   6  -1   38.90    9.80
   9  -6   1   56.99   10.00
   9  -6   1   67.29   10.00
 -10   6  -1    4.40    6.60
  10  -6   1    7.60    6.10
  10  -6   1    2.00    4.80
 -11   6  -1   56.29   14.30
  11  -6   1   57.29   13.00
  11  -6   1   72.49   12.80
 -12   6  -1   28.20   10.90
  12  -6   1   33.30   11.00
  12  -6   1   28.50   10.50
 -13   6  -1   45.90   13.80
  13  -6   1   46.90   14.30
  13  -6   1   23.20   10.20
 -14   6  -1  113.39   21.00
  14  -6   1  103.99   20.00
  14  -6   1   97.59   19.50
 -15   6  -1   23.40   13.40
  15  -6   1   14.80   12.30
  12   5  -1    2.90   11.60
  12   5  -1  -12.90   12.50
  12   5  -1   -0.10   12.10
  11   5  -1  179.08   23.20
  11   5  -1  244.18   24.20
  10   5  -1  156.68   18.70
  10   5  -1  154.98   18.70
   9   5  -1   10.90    7.50
   9   5  -1    8.50    8.20
   8   5  -1  187.38   17.80
   8   5  -1  212.48   17.60
   7   5  -1  503.25   24.50
   7   5  -1  449.36   24.90
  -7  -5   1  456.45   27.10
   6   5  -1  981.70   35.40
   6   5  -1  975.80   36.40
  -6  -5   1  925.11   37.40
   5   5  -1    5.40    5.00
   5   5  -1    0.10    3.40
   5   5  -1   -2.20    3.10
  -5  -5   1    1.30    4.00
   4   5  -1  259.57   15.50
   4   5  -1  239.98   13.90
   4   5  -1  274.97   13.60
   4   5  -1  263.47   14.70
  -4  -5   1  283.37   15.80
   3   5  -1  754.32   23.50
   3   5  -1  729.73   25.70
   3   5  -1  778.82   27.30
   3   5  -1  745.93   24.60
   3   5  -1  744.33   26.20
  -3  -5   1  750.12   26.60
   2   5  -1 1147.69   33.40
   2   5  -1 1167.68   33.80
   2   5  -1 1148.49   29.60
   2   5  -1 1094.29   32.40
   2   5  -1 1143.99   30.50
  -2  -5   1 1116.99   33.30
   1   5  -1  146.89    5.70
   1   5  -1  151.48    6.80
  -1  -5   1  136.59    8.30
  -1  -5   1  148.39    8.30
   0   5  -1   40.80    4.70
   0   5  -1   47.00    5.30
   0  -5   1   40.70    4.70
   0  -5   1   47.10    5.00
  -1   5  -1  434.56   16.20
  -1   5  -1  428.56   16.90
   1  -5   1  443.96   16.40
   1  -5   1  473.65   16.50
  -2   5  -1  758.42   24.00
   2  -5   1  778.52   25.00
   2  -5   1  771.42   19.80
   2  -5   1  744.03   18.90
   2  -5   1  722.53   23.60
  -3   5  -1  709.73   24.00
  -3   5  -1  724.13   25.90
   3  -5   1  721.93   22.20
   3  -5   1  740.63   20.90
   3  -5   1  711.13   24.10
   3  -5   1  722.33   25.80
  -4   5  -1    8.10    3.70
  -4   5  -1    7.30    3.50
   4  -5   1    2.00    4.00
   4  -5   1    6.00    3.10
   4  -5   1    6.70    2.50
   4  -5   1    5.90    2.80
  -5   5  -1 1027.50   34.60
  -5   5  -1 1193.58   39.20
   5  -5   1 1157.08   34.10
   5  -5   1 1074.69   38.50
   5  -5   1 1152.98   36.30
  -6   5  -1 2661.23   74.39
   6  -5   1 2679.83   71.29
   6  -5   1 2623.04   69.09
  -7   5  -1  379.96   22.20
   7  -5   1  383.36   20.30
   7  -5   1  365.56   19.30
  -8   5  -1   69.79   11.30
   8  -5   1   46.20    8.40
  -9   5  -1   15.90    8.00
   9  -5   1    8.10    4.90
   9  -5   1   -0.80    4.00
 -10   5  -1  497.15   30.50
  10  -5   1  427.56   26.40
  10  -5   1  427.36   26.10
 -11   5  -1  288.47   24.60
  11  -5   1  256.07   21.80
  11  -5   1  273.77   22.10
 -12   5  -1   80.69   17.30
  12  -5   1   53.99   12.10
  12  -5   1   26.90   10.30
 -13   5  -1    8.00    9.30
  13  -5   1   13.30    9.40
  13  -5   1   11.40    9.80
 -14   5  -1   33.40   13.20
  14  -5   1   43.30   12.80
  14  -5   1   51.59   13.70
  15  -5   1  218.68   26.80
  13   4  -1   49.90   17.00
  13   4  -1   65.29   15.80
  12   4  -1   66.89   14.90
  12   4  -1  150.08   21.60
  12   4  -1   66.69   16.70
  11   4  -1  152.98   20.90
  11   4  -1  205.98   24.90
  10   4  -1  188.98   19.40
  10   4  -1  123.79   16.10
   9   4  -1   41.00    9.90
   9   4  -1   45.00   11.10
   8   4  -1    7.70    5.70
   8   4  -1   15.10    7.30
   7   4  -1  250.47   17.50
   7   4  -1  248.28   17.90
   6   4  -1   37.30    7.30
   6   4  -1   38.90    7.10
   5   4  -1   73.49    9.50
   5   4  -1   63.09    7.60
   5   4  -1   47.20    6.60
  -5  -4   1   49.50    7.90
   4   4  -1    3.00    2.40
   4   4  -1    7.60    3.50
   4   4  -1   -1.60    2.70
   4   4  -1    3.30    3.90
  -4  -4   1    1.50    2.70
  -4  -4   1   -1.90    2.20
   3   4  -1   17.90    4.00
   3   4  -1   15.40    4.60
   3   4  -1   15.60    4.20
  -3  -4   1   14.70    3.90
  -3  -4   1   14.80    4.00
   2   4  -1  916.61   27.90
   2   4  -1  966.50   26.50
   2   4  -1  938.11   27.20
   2   4  -1  948.91   28.30
  -2  -4   1  957.30   27.80
  -2  -4   1  952.20   27.10
   1   4  -1  312.67   10.10
   1   4  -1  295.67   11.60
   1   4  -1  307.27   12.50
  -1  -4   1  293.97   11.30
  -1  -4   1  271.07   11.50
   0   4  -1 1822.32   44.60
   0   4  -1 1889.31   45.90
   0  -4   1 1819.12   44.70
   0  -4   1 1892.51   44.90
  -1   4  -1   67.29    5.10
  -1   4  -1   64.09    5.50
   1  -4   1   73.89    5.80
   1  -4   1   73.39    2.40
   1  -4   1   65.99    5.10
  -2   4  -1  147.29    9.10
  -2   4  -1  149.09    8.20
   2  -4   1  146.79    8.80
   2  -4   1  158.98    7.20
   2  -4   1  147.59    9.60
   2  -4   1  148.39    6.20
  -3   4  -1   22.10    3.70
  -3   4  -1   25.70    3.70
  -3   4  -1   20.40    4.20
   3  -4   1   20.90    4.70
   3  -4   1   26.20    3.80
   3  -4   1   25.40    4.00
   3  -4   1   21.40    3.20
  -4   4  -1   64.59    6.50
  -4   4  -1   73.09    7.60
  -4   4  -1   65.99    6.50
   4  -4   1   81.99    7.60
   4  -4   1   70.79    6.70
   4  -4   1   64.29    7.50
  -5   4  -1   38.90    6.40
  -5   4  -1   44.00    6.70
   5  -4   1   47.30    8.70
   5  -4   1   34.70    5.40
   5  -4   1   49.00    7.70
  -6   4  -1   79.69    9.20
  -6   4  -1   72.49    9.30
   6  -4   1   71.29    8.50
   6  -4   1   72.19    9.70
  -7   4  -1   18.50    6.80
  -7   4  -1   27.20    7.70
   7  -4   1   35.00    6.70
  -8   4  -1    4.60    5.20
  -8   4  -1   17.10    6.80
   8  -4   1    9.90    3.40
   8  -4   1    0.00    3.00
  -9   4  -1  148.29   15.30
   9  -4   1  166.78   15.10
   9  -4   1  170.88   15.30
 -10   4  -1  278.97   22.40
  10  -4   1  276.97   20.60
  10  -4   1  292.17   20.70
 -11   4  -1  261.67   23.50
  11  -4   1  292.87   23.30
  11  -4   1  244.08   20.90
 -12   4  -1    8.30    8.40
  12  -4   1    0.10    5.70
  12  -4   1    1.60    6.40
 -13   4  -1   37.60   14.20
  13  -4   1   46.40   12.50
  13  -4   1   81.99   17.60
 -14   4  -1  191.28   25.40
  14  -4   1  247.28   26.60
  14  -4   1  194.18   23.10
 -15   4  -1   51.19   16.80
  15  -4   1   28.60   13.00
  13   3  -1    7.30   12.30
  13   3  -1   -1.80   11.30
  13   3  -1   28.50   12.70
  12   3  -1  140.69   20.80
  12   3  -1  124.59   18.60
  12   3  -1   95.79   17.90
  11   3  -1   40.00   11.60
  11   3  -1   25.10    9.70
  10   3  -1    3.70    6.40
  10   3  -1   -9.30    6.10
 -10  -3   1    7.80    7.30
   9   3  -1   -3.50    4.70
   9   3  -1    0.70    5.10
  -9  -3   1   -2.80    5.60
   8   3  -1  219.18   17.00
  -8  -3   1  238.98   19.00
   7   3  -1  444.76   23.30
  -7  -3   1  420.76   23.80
   6   3  -1   35.60    7.40
  -6  -3   1   32.20    7.10
   5   3  -1   25.70    5.80
   5   3  -1   37.60    6.80
  -5  -3   1   44.80    6.70
  -5  -3   1   47.00    6.80
  -5  -3   1   38.90    6.70
   4   3  -1  239.58   12.80
   4   3  -1  257.07   16.60
   4   3  -1  250.37   12.80
  -4  -3   1  250.67   13.90
  -4  -3   1  251.77   14.30
   3   3  -1  566.04   19.10
   3   3  -1  527.35   20.20
   3   3  -1  535.75   19.70
   3   3  -1  579.44   19.80
  -3  -3   1  557.54   23.30
  -3  -3   1  536.95   19.70
   2   3  -1  362.06   13.20
   2   3  -1  356.56   14.10
   2   3  -1  353.06   13.10
   2   3  -1  382.36   13.90
  -2  -3   1  358.66   13.60
  -2  -3   1  330.97   13.10
   1   3  -1 1725.03   41.80
   1   3  -1 1680.93   40.50
  -1  -3   1 1705.53   40.80
  -1  -3   1 1726.33   40.90
  -1  -3   1 1745.23   39.70
   0   3  -1 1434.06   34.10
   0   3  -1 1442.16   35.30
   0  -3   1 1432.26   34.00
   0  -3   1 1392.46   34.50
  -1   3  -1   20.40    3.30
  -1   3  -1   16.00    2.50
   1  -3   1   20.20    2.80
   1  -3   1   24.40    3.50
   1  -3   1   18.70    1.50
   1  -3   1   19.20    1.70
  -2   3  -1 2468.55   56.19
  -2   3  -1 2473.75   56.99
  -2   3  -1 2422.16   58.79
   2  -3   1 2410.86   55.89
   2  -3   1 2440.26   57.09
   2  -3   1 2451.55   58.79
  -3   3  -1  367.06   14.10
  -3   3  -1  387.96   15.10
   3  -3   1  384.26   14.70
   3  -3   1  365.36   15.80
   3  -3   1  388.36   14.80
  -4   3  -1 2246.58   57.79
  -4   3  -1 2204.78   58.49
   4  -3   1 2166.08   58.49
   4  -3   1 2226.18   57.19
   4  -3   1 2142.69   55.49
  -5   3  -1 2681.53   71.79
  -5   3  -1 2788.32   72.49
   5  -3   1 2745.23   72.89
   5  -3   1 2675.83   68.79
   5  -3   1 2749.82   71.49
  -6   3  -1    5.50    3.80
  -6   3  -1   -0.30    3.50
   6  -3   1    5.40    3.50
  -7   3  -1  675.33   29.70
  -7   3  -1  539.35   27.90
   7  -3   1  601.04   25.90
  -8   3  -1 1532.65   53.29
  -8   3  -1 1560.14   55.59
   8  -3   1 1495.95   49.50
  -9   3  -1 1319.67   53.19
  -9   3  -1 1331.17   51.39
   9  -3   1 1293.07   47.20
   9  -3   1 1400.26   49.40
 -10   3  -1   -3.60    5.80
  10  -3   1   -1.90    4.10
  10  -3   1   -0.30    3.80
 -11   3  -1  258.47   23.60
  11  -3   1  219.48   19.80
  11  -3   1  216.48   20.50
 -12   3  -1   65.99   15.60
  12  -3   1   53.59   11.60
  12  -3   1   72.59   13.50
 -13   3  -1  150.08   21.60
  13  -3   1  142.09   19.20
  13  -3   1  145.09   18.80
 -14   3  -1    2.90   11.00
  14  -3   1   -0.80    9.40
  14  -3   1    8.40   10.00
 -15   3  -1   43.80   18.60
  15  -3   1    8.70   12.80
  15  -3   1   30.50   13.80
  14   2  -1   37.70   15.10
  14   2  -1   37.20   13.70
  13   2  -1    9.60   10.90
  13   2  -1   10.60   10.30
  13   2  -1   -5.90   10.00
  12   2  -1  448.96   30.80
  12   2  -1  380.96   28.90
  12   2  -1  413.06   31.30
 -12  -2   1  387.06   31.30
  11   2  -1  215.48   21.50
  11   2  -1  219.28   20.50
 -11  -2   1  228.88   23.00
  10   2  -1  130.89   16.20
 -10  -2   1  139.79   17.90
   9   2  -1   -3.40    4.30
  -9  -2   1   -2.90    5.10
   8   2  -1  627.84   30.10
  -8  -2   1  623.14   30.80
   7   2  -1  119.89   12.20
  -7  -2   1  117.59   12.10
   6   2  -1   46.10    7.20
  -6  -2   1   52.29    8.50
  -6  -2   1   68.09    8.60
   5   2  -1  257.57   15.60
   5   2  -1  282.27   14.40
   5   2  -1  230.88   14.90
  -5  -2   1  264.27   15.20
  -5  -2   1  279.97   16.60
   4   2  -1  676.23   23.40
   4   2  -1  643.44   24.80
   4   2  -1  686.13   25.00
  -4  -2   1  716.63   26.10
  -4  -2   1  684.83   24.70
  -4  -2   1  671.03   24.70
   3   2  -1  628.94   22.40
   3   2  -1  670.63   21.20
   3   2  -1  699.53   22.90
  -3  -2   1  689.43   25.90
  -3  -2   1  658.83   22.50
  -3  -2   1  682.33   22.20
   2   2  -1  136.19    7.30
   2   2  -1  123.99    6.50
   2   2  -1  134.89    7.60
   2   2  -1  140.89    7.10
  -2  -2   1  125.79    6.80
  -2  -2   1  120.69    7.10
   1   2  -1    0.70    1.10
   1   2  -1    0.20    1.10
   1   2  -1    0.50    1.10
  -1  -2   1    0.20    0.80
  -1  -2   1    0.30    1.00
  -1  -2   1    1.90    1.10
   0   2  -1   29.90    2.30
   0   2  -1   28.00    2.90
   0  -2   1   30.90    2.90
   0  -2   1   29.40    2.30
  -1   2  -1   20.30    2.00
  -1   2  -1   21.80    2.30
  -1   2  -1   18.70    2.80
   1  -2   1   20.70    1.90
   1  -2   1   23.20    2.30
   1  -2   1   18.70    2.80
  -2   2  -1  184.68    9.20
  -2   2  -1  192.58    8.40
  -2   2  -1  183.08    7.90
   2  -2   1  187.18    9.30
   2  -2   1  194.08    8.50
   2  -2   1  188.58    8.10
  -3   2  -1   71.29    6.40
  -3   2  -1   81.59    6.50
   3  -2   1   78.69    6.50
   3  -2   1   75.99    6.60
   3  -2   1   66.09    5.30
  -4   2  -1    2.00    2.30
  -4   2  -1   -0.10    1.80
   4  -2   1    2.00    2.20
   4  -2   1    0.10    1.30
   4  -2   1    3.50    2.30
  -5   2  -1  215.18   13.80
  -5   2  -1  218.68   14.00
   5  -2   1  217.38   13.70
   5  -2   1  219.98   12.20
   5  -2   1  220.78   13.60
  -6   2  -1   48.00    7.20
  -6   2  -1   74.69    9.20
   6  -2   1   54.69    6.70
  -7   2  -1  130.79   12.60
  -7   2  -1  105.79   11.40
   7  -2   1  100.89   10.10
  -8   2  -1    7.10    4.70
  -8   2  -1    6.40    5.20
   8  -2   1    4.60    3.40
  -9   2  -1   32.90    8.90
  -9   2  -1   49.70   12.00
   9  -2   1   29.00    7.60
   9  -2   1   33.80    8.50
 -10   2  -1  460.05   29.20
  10  -2   1  437.56   25.50
  10  -2   1  412.06   26.30
 -11   2  -1   31.60   11.20
  11  -2   1   51.99   12.00
  11  -2   1   30.20    9.00
 -12   2  -1   46.70   11.60
  12  -2   1   45.40   12.50
  12  -2   1   59.19   12.20
 -13   2  -1  352.66   29.40
  13  -2   1  320.87   26.50
  13  -2   1  322.07   28.20
 -14   2  -1  140.29   22.70
  14  -2   1  188.88   23.90
  14  -2   1  167.78   21.90
  15  -2   1    1.30   11.80
  14   1  -1   -3.40   11.80
  14   1  -1   12.70   13.20
  14   1  -1    7.60   12.30
 -14  -1   1   16.30   13.30
  13   1  -1   -3.90    9.60
  13   1  -1    4.60    9.00
 -13  -1   1  -13.80    9.80
  12   1  -1   99.89   17.10
  12   1  -1   82.39   16.10
  11   1  -1   -6.90    5.20
  11   1  -1    0.90    7.20
 -11  -1   1   -4.00    6.80
  10   1  -1   17.20    6.50
  10   1  -1    0.00    5.70
 -10  -1   1   14.20    7.20
   9   1  -1   58.69   11.10
  -9  -1   1   67.49   11.20
   8   1  -1    2.60    4.50
   7   1  -1  366.76   20.40
  -7  -1   1  320.67   20.10
  -6  -1   1 1014.90   37.10
  -6  -1   1 1099.79   40.10
   5   1  -1 1117.99   37.50
   5   1  -1 1180.98   38.20
   5   1  -1 1121.49   36.00
  -5  -1   1 1160.18   37.70
  -5  -1   1 1173.38   39.10
   4   1  -1   93.89    8.40
   4   1  -1   98.19    7.80
   4   1  -1   84.89    7.60
  -4  -1   1   91.89    7.80
  -4  -1   1   95.79    8.50
   3   1  -1 1920.01   48.10
   3   1  -1 1903.51   49.70
   3   1  -1 1935.11   49.70
  -3  -1   1 1999.10   49.40
  -3  -1   1 2002.70   50.69
   2   1  -1 4630.14  101.59
   2   1  -1 4505.25  101.29
   2   1  -1 4608.74   99.99
  -2  -1   1 4653.83  100.59
  -2  -1   1 4655.83  101.49
  -2  -1   1 4557.04  101.69
   1   1  -1  496.05   13.90
   1   1  -1  519.95   13.10
   1   1  -1  510.25   13.80
   1   1  -1  518.25   14.40
   1   1  -1  505.55   13.20
  -1  -1   1  507.65   13.10
  -1   1  -1  459.75   12.40
  -1   1  -1  451.55   13.10
   1  -1   1  440.16   12.20
   1  -1   1  453.95   11.90
  -2   1  -1 6041.50  129.79
  -2   1  -1 5924.21  129.29
   2  -1   1 5960.00  129.69
   2  -1   1 5975.90  129.19
  -3   1  -1    1.20    1.90
  -3   1  -1    1.30    1.60
   3  -1   1   -1.60    1.70
   3  -1   1    0.90    2.10
   3  -1   1    1.90    1.80
  -4   1  -1    6.50    3.20
  -4   1  -1    0.70    1.90
   4  -1   1    4.30    2.20
   4  -1   1    1.50    2.10
   4  -1   1    6.50    2.90
  -5   1  -1 1440.46   46.20
  -5   1  -1 1520.05   45.60
   5  -1   1 1559.14   45.50
   5  -1   1 1535.25   45.90
   5  -1   1 1521.35   45.80
  -6   1  -1  284.07   17.10
  -6   1  -1  294.07   18.30
  -7   1  -1   -0.20    3.30
  -7   1  -1    0.20    3.30
  -8   1  -1   24.20    7.10
  -8   1  -1   35.80   10.00
  -9   1  -1  338.97   23.30
  -9   1  -1  349.17   25.10
   9  -1   1  363.76   21.70
 -10   1  -1   66.89   13.40
  10  -1   1  103.59   13.10
  10  -1   1  107.89   14.10
 -11   1  -1   -5.00    6.10
  11  -1   1   -2.10    5.20
  11  -1   1   -5.60    6.30
 -12   1  -1   21.40    9.60
  12  -1   1    3.10    7.80
  12  -1   1   29.60   11.00
 -13   1  -1   28.50   11.60
  13  -1   1   73.19   16.00
  13  -1   1   36.60   13.00
 -14   1  -1   58.89   16.20
  14  -1   1   27.80   12.90
  14  -1   1   44.10   14.10
 -15   1  -1    7.60   15.10
  15  -1   1  -11.60   18.50
  15   0  -1   28.30   14.80
  14   0  -1  122.19   23.30
  14   0  -1  101.99   25.70
 -14   0   1  153.98   25.10
  13   0  -1  310.97   26.40
  13   0  -1  245.88   25.40
 -13   0   1  333.77   29.30
  12   0  -1   62.99   18.80
  12   0  -1   57.29   14.40
 -12   0   1   58.39   14.50
  11   0  -1    2.80    5.90
  11   0  -1   -1.30    5.10
 -11   0   1   -4.70    6.20
  10   0  -1    7.60    5.00
  10   0  -1    8.50    5.50
 -10   0   1    0.40    5.10
   9   0  -1  218.88   16.80
   9   0  -1  237.88   18.70
  -9   0   1  258.47   20.20
   8   0  -1   35.20   10.30
  -8   0   1   11.90    6.60
   7   0  -1   40.70    7.60
  -7   0   1   36.30    7.90
   6   0  -1    0.80    3.80
   6   0  -1    6.30    3.30
  -6   0   1    2.00    2.80
  -6   0   1    1.60    2.90
   5   0  -1  951.50   33.00
  -5   0   1  933.61   32.50
  -5   0   1  940.01   33.80
   4   0  -1  767.22   25.40
   4   0  -1  725.93   26.10
   4   0  -1  763.22   26.30
  -4   0   1  777.42   26.30
   3   0  -1   42.80    5.00
   3   0  -1   41.30    4.60
   3   0  -1   38.90    4.90
  -3   0   1   37.90    4.60
  -3   0   1   42.70    5.00
   2   0  -1   10.80    2.60
   2   0  -1    9.30    2.20
   2   0  -1    7.70    2.00
  -2   0   1   12.40    2.50
  -2   0   1    9.70    2.40
  -1   0  -1    0.80    0.80
  -1   0  -1    0.00    0.60
  -1   0  -1    0.00    0.60
   1   0   1    0.80    0.80
   1   0   1    0.80    0.80
  -2   0  -1   38.10    3.90
  -2   0  -1   37.20    3.80
  -2   0  -1   35.00    3.90
   2   0   1   35.20    3.80
   2   0   1   30.50    3.80
   2   0   1   30.90    3.70
  -3   0  -1  214.88   11.20
  -3   0  -1  221.48   11.00
  -3   0  -1  222.78   11.50
   3   0   1  222.38   11.00
   3   0   1  226.08   11.10
   3   0   1  242.58   11.50
  -4   0  -1   26.50    4.80
  -4   0  -1   34.20    5.50
   4   0   1   37.60    5.60
   4   0   1   31.10    5.60
   4   0   1   31.10    5.30
  -5   0  -1  120.49   10.10
  -5   0  -1  141.69   11.50
   5   0   1  127.89   10.40
   5   0   1  132.39   10.50
   5   0   1  116.19   10.40
  -6   0  -1  336.17   19.80
  -6   0  -1  329.07   18.60
  -7   0  -1   69.09    9.90
  -7   0  -1   81.69   10.40
  -8   0  -1  100.89   12.40
  -8   0  -1   76.49   15.50
  -9   0  -1   70.39   12.10
  -9   0  -1   69.99   12.20
 -10   0  -1    0.30    6.00
  10   0   1    4.70    4.40
 -11   0  -1   26.90   10.10
  11   0   1   19.80    8.30
  11   0   1   16.80    7.50
 -12   0  -1   79.49   16.00
  12   0   1  113.19   16.90
  12   0   1   75.49   17.20
 -13   0  -1   17.50   12.20
  13   0   1   14.00   12.10
  13   0   1   27.70   13.30
 -14   0  -1    8.60   11.80
  14   0   1  -18.70   10.10
  15  -1  -1   30.60   17.40
  14  -1  -1    5.50   10.90
  14  -1  -1   13.60   11.30
  13  -1  -1   62.69   13.50
  13  -1  -1   78.79   16.70
 -13   1   1   71.49   16.90
  12  -1  -1   66.09   13.20
  12  -1  -1   53.79   10.90
 -12   1   1   42.60   12.30
  11  -1  -1   26.10    7.40
  11  -1  -1   20.10    8.10
 -11   1   1   19.40    8.60
  10  -1  -1   12.30    6.40
  10  -1  -1   29.20    7.40
 -10   1   1   19.60    8.70
   9  -1  -1  900.71   35.50
   9  -1  -1  814.62   36.30
  -9   1   1  791.82   37.40
   8  -1  -1 1021.30   37.30
   8  -1  -1 1020.20   39.10
  -8   1   1 1014.90   40.80
   7  -1  -1   95.19   10.30
   7  -1  -1   93.49    9.10
  -7   1   1  103.69   11.40
   6  -1  -1  448.56   20.80
   6  -1  -1  462.15   19.90
  -6   1   1  498.05   24.00
  -6   1   1  460.95   22.50
   5  -1  -1 2876.91   75.39
   5  -1  -1 2948.80   71.99
   5  -1  -1 2930.21   75.99
   5  -1  -1 2995.60   73.39
  -5   1   1 2952.50   77.19
  -5   1   1 2886.71   75.49
   4  -1  -1 2993.60   71.19
   4  -1  -1 3051.59   74.39
   4  -1  -1 3005.80   72.09
  -4   1   1 3007.80   74.19
  -4   1   1 2986.40   75.29
   3  -1  -1  126.59    7.30
   3  -1  -1  126.59    8.30
   3  -1  -1  123.09    7.90
   3  -1  -1  116.79    6.80
  -3   1   1  124.29    7.80
   2  -1  -1   15.00    3.10
   2  -1  -1    9.30    2.50
   2  -1  -1   11.90    2.10
   2  -1  -1   17.30    2.30
  -2   1   1   13.20    2.20
  -2   1   1   15.80    2.60
   1  -1  -1 2121.19   48.30
   1  -1  -1 2203.28   48.20
   1  -1  -1 2217.28   47.80
  -1   1   1 2212.08   47.80
  -1   1   1 2193.88   49.80
  -1   1   1 2229.38   48.20
   0  -1  -1 1844.12   39.00
   0  -1  -1 1831.72   39.90
   0   1   1 1726.53   39.80
  -1  -1  -1 3375.96   75.39
  -1  -1  -1 3544.15   74.39
  -1  -1  -1 3460.35   75.49
   1   1   1 3474.05   74.29
   1   1   1 3416.06   75.29
   1   1   1 3473.55   75.29
  -2  -1  -1  110.99    7.00
  -2  -1  -1  110.79    6.70
  -2  -1  -1  111.39    6.30
   2   1   1  106.79    6.30
   2   1   1  112.19    6.80
   2   1   1  119.49    6.70
  -3  -1  -1 2623.04   64.29
  -3  -1  -1 2683.83   65.99
  -3  -1  -1 2791.12   70.49
   3   1   1 2613.84   64.39
   3   1   1 2667.23   64.39
   3   1   1 2671.13   65.29
  -4  -1  -1 5301.07  122.49
  -4  -1  -1 5162.28  121.39
  -4  -1  -1 5192.98  120.39
   4   1   1 5249.47  120.59
   4   1   1 5176.58  121.19
   4   1   1 5277.77  119.99
  -5  -1  -1 1039.00   36.50
  -5  -1  -1 1005.00   35.50
  -5  -1  -1 1021.40   34.70
   5   1   1 1011.10   35.20
   5   1   1 1102.79   35.80
  -6  -1  -1    5.10    3.20
  -6  -1  -1    3.20    3.60
  -7  -1  -1   46.60    8.20
  -7  -1  -1   56.59    9.00
  -8  -1  -1 1148.29   46.90
  -8  -1  -1 1030.00   60.49
  -9  -1  -1  327.97   23.10
  -9  -1  -1  329.87   24.90
 -10  -1  -1  118.59   16.00
  10   1   1  151.78   16.70
 -11  -1  -1   19.00    8.40
  11   1   1   22.40    9.50
  12   1   1  102.69   16.90
  12   1   1  139.69   27.40
 -13  -1  -1  197.48   25.70
  13   1   1  205.88   22.90
  13   1   1  207.18   25.20
 -14  -1  -1   21.20   14.00
  14   1   1   37.10   14.90
  15  -2  -1   45.70   15.70
  15  -2  -1   35.60   13.00
 -15   2   1   35.30   16.00
  14  -2  -1   90.09   18.60
  14  -2  -1  100.79   19.90
 -14   2   1   72.19   16.00
  13  -2  -1   13.30   10.80
  13  -2  -1   16.80    9.90
 -13   2   1   48.90   14.70
  12  -2  -1   95.99   16.10
  12  -2  -1  111.49   15.80
 -12   2   1   97.79   16.30
  11  -2  -1   38.90    8.00
  11  -2  -1   62.89   13.60
 -11   2   1   47.80   12.20
  10  -2  -1   30.30    8.00
  10  -2  -1   32.80    9.50
 -10   2   1   34.20    9.30
   9  -2  -1  339.07   21.00
   9  -2  -1  348.67   21.90
  -9   2   1  372.26   24.30
   8  -2  -1   45.10    8.10
   8  -2  -1   66.29    8.90
  -8   2   1   56.09    9.70
   7  -2  -1   36.60    6.10
   7  -2  -1   36.50    6.50
  -7   2   1   41.50    7.30
   6  -2  -1    0.60    2.10
   6  -2  -1   -0.70    2.40
  -6   2   1    3.20    2.80
   5  -2  -1  113.59    8.70
   5  -2  -1  111.99    9.90
   5  -2  -1  121.89    9.10
   5  -2  -1  117.59   10.20
  -5   2   1  120.39    9.80
   4  -2  -1    5.50    1.90
   4  -2  -1   12.10    3.30
   4  -2  -1    7.80    3.50
   4  -2  -1    6.80    2.50
  -4   2   1   20.70    4.90
   3  -2  -1  192.18   10.20
   3  -2  -1  195.88   10.30
   3  -2  -1  205.48    9.30
   3  -2  -1  194.38    9.40
  -3   2   1  179.98    9.90
  -3   2   1  202.58    9.40
   2  -2  -1   54.39    4.00
   2  -2  -1   48.40    4.40
   2  -2  -1   55.19    4.40
  -2   2   1   56.79    4.40
  -2   2   1   54.69    4.00
  -2   2   1   58.09    4.50
   1  -2  -1   99.99    4.20
   1  -2  -1  102.99    4.80
   1  -2  -1  102.69    5.40
  -1   2   1   98.49    4.20
  -1   2   1   98.29    5.30
  -1   2   1   97.29    4.60
   0  -2  -1    4.00    1.00
   0  -2  -1    1.80    1.00
   0  -2  -1    2.30    1.40
   0   2   1    4.20    1.10
   0   2   1    2.50    1.30
   0   2   1    1.90    1.00
  -1  -2  -1  111.39    6.10
  -1  -2  -1  111.49    5.70
   1   2   1  109.79    6.00
   1   2   1  104.99    5.40
   1   2   1  114.19    4.90
   1   2   1  121.79    6.10
  -2  -2  -1   71.69    5.70
  -2  -2  -1   70.49    5.10
  -2  -2  -1   74.09    5.80
   2   2   1   81.19    5.70
   2   2   1   71.99    5.20
   2   2   1   81.99    5.80
  -3  -2  -1   18.60    4.00
  -3  -2  -1   21.10    4.20
  -3  -2  -1   20.60    4.70
   3   2   1   19.20    3.90
   3   2   1   20.10    4.20
   3   2   1   20.40    3.70
  -4  -2  -1  344.97   16.90
  -4  -2  -1  324.77   15.70
  -4  -2  -1  365.16   17.50
   4   2   1  329.57   16.00
   4   2   1  314.17   16.10
  -5  -2  -1  337.57   18.40
  -5  -2  -1  351.76   17.70
  -5  -2  -1  354.16   19.40
   5   2   1  333.77   18.10
   5   2   1  313.67   16.60
  -6  -2  -1  174.28   14.80
  -6  -2  -1  179.58   13.30
  -6  -2  -1  149.09   13.50
  -7  -2  -1   39.20    7.90
  -7  -2  -1   40.80    9.80
  -8  -2  -1   80.69   12.40
  -8  -2  -1   72.89   10.70
  -9  -2  -1  342.97   25.60
  -9  -2  -1  312.57   22.90
   9   2   1  320.47   22.30
 -10  -2  -1   25.20    8.70
  10   2   1   11.30    7.60
 -11  -2  -1   12.30    9.90
  11   2   1   -6.90    6.50
 -12  -2  -1  216.38   23.30
  12   2   1  202.68   21.30
  12   2   1  197.28   22.80
 -13  -2  -1  166.28   22.80
  13   2   1  148.29   22.00
  13   2   1  146.79   22.10
  13   2   1  152.08   22.50
  14   2   1  -11.40   13.20
  14   2   1   -0.30   13.00
  14   2   1  -25.10   12.90
  15  -3  -1   37.70   15.30
  15  -3  -1   40.10   15.20
 -15   3   1   10.40   12.00
  14  -3  -1   90.19   18.20
  14  -3  -1  118.69   20.20
 -14   3   1  105.09   21.60
  13  -3  -1   52.29   12.50
  13  -3  -1   34.00   10.50
 -13   3   1   40.30   11.30
  12  -3  -1   -9.60    5.90
  12  -3  -1    2.30    6.90
 -12   3   1    7.20    7.70
  11  -3  -1   44.50   10.20
  11  -3  -1   38.50    9.30
 -11   3   1   33.00   10.10
  10  -3  -1  879.11   39.10
  10  -3  -1  897.41   38.40
 -10   3   1  898.11   42.00
   9  -3  -1  581.24   28.70
   9  -3  -1  639.94   30.30
  -9   3   1  622.24   32.10
   8  -3  -1    0.50    3.70
   8  -3  -1    5.60    3.40
  -8   3   1    4.60    3.90
   7  -3  -1  170.58   12.90
   7  -3  -1  181.48   13.60
  -7   3   1  184.78   14.80
   6  -3  -1 1141.19   37.60
   6  -3  -1 1241.58   38.40
   6  -3  -1 1168.78   44.50
  -6   3   1 1169.68   40.10
   5  -3  -1   -0.30    3.60
   5  -3  -1    1.10    2.40
   5  -3  -1    2.20    3.20
   5  -3  -1    0.50    2.50
  -5   3   1    3.00    2.40
   4  -3  -1  173.88   11.00
   4  -3  -1  167.08    9.80
   4  -3  -1  170.88    9.50
   4  -3  -1  157.58   10.50
  -4   3   1  164.98    9.80
  -4   3   1  179.58   11.20
   3  -3  -1   16.90    2.90
   3  -3  -1   15.60    3.80
   3  -3  -1   15.80    3.50
   3  -3  -1   24.00    3.90
  -3   3   1   24.80    3.90
  -3   3   1   18.10    3.50
   2  -3  -1   10.30    2.60
   2  -3  -1    9.90    1.90
   2  -3  -1    9.20    2.40
  -2   3   1   11.20    2.70
  -2   3   1    5.20    2.00
  -2   3   1   10.90    2.10
   1  -3  -1    1.70    1.40
   1  -3  -1    3.50    1.10
   1  -3  -1    3.10    1.70
  -1   3   1    4.70    1.50
  -1   3   1    4.80    1.20
  -1   3   1    2.60    1.70
   0  -3  -1  248.08    7.80
   0  -3  -1  228.48    9.80
   0  -3  -1  239.18    7.60
   0   3   1  222.98    9.60
   0   3   1  243.98    8.00
   0   3   1  237.68    7.50
  -1  -3  -1 2501.95   56.39
  -1  -3  -1 2359.06   57.99
   1   3   1 2533.25   55.59
   1   3   1 2483.65   55.19
   1   3   1 2441.56   55.69
   1   3   1 2433.86   57.99
  -2  -3  -1  289.77   12.30
  -2  -3  -1  278.07   12.50
   2   3   1  277.47   11.80
   2   3   1  266.07   11.90
   2   3   1  280.77   11.50
   2   3   1  280.27   10.80
  -3  -3  -1  703.13   24.70
  -3  -3  -1  736.43   23.60
  -3  -3  -1  710.73   24.90
   3   3   1  707.13   24.00
   3   3   1  697.23   23.30
   3   3   1  704.33   23.80
  -4  -3  -1  145.59   10.10
  -4  -3  -1  162.18   11.80
  -4  -3  -1  143.89   11.00
   4   3   1  141.69   10.30
  -5  -3  -1    1.50    2.90
  -5  -3  -1    4.40    3.50
  -5  -3  -1    7.00    4.10
   5   3   1    1.00    4.30
  -6  -3  -1  290.77   18.80
  -6  -3  -1  265.87   17.00
  -6  -3  -1  255.97   17.70
  -7  -3  -1  915.91   36.50
  -7  -3  -1  869.61   38.60
  -7  -3  -1  892.71   38.50
  -8  -3  -1   31.80    8.30
  -8  -3  -1   37.60    9.30
  -9  -3  -1   59.39   12.00
   9   3   1   88.79   12.90
 -10  -3  -1  147.39   17.80
  10   3   1  151.58   17.30
 -11  -3  -1  221.78   22.80
  11   3   1  218.08   21.80
  11   3   1  209.78   21.30
  12   3   1   47.60   14.70
  12   3   1   25.80   13.10
  13   3   1   -5.20   11.40
  13   3   1   -0.30   11.90
  13   3   1    9.70   11.70
  15  -4  -1    7.10   12.20
  14  -4  -1  272.37   26.80
  14  -4  -1  296.37   28.20
 -14   4   1  272.87   28.90
  13  -4  -1  137.59   20.20
  13  -4  -1  168.58   19.40
 -13   4   1  125.59   19.20
  12  -4  -1   30.90   10.60
  12  -4  -1   44.90   11.00
 -12   4   1   37.00   12.20
  11  -4  -1   -5.40    5.60
  11  -4  -1   -5.20    6.00
 -11   4   1   -1.80    6.10
  10  -4  -1  482.25   27.10
  10  -4  -1  470.15   27.10
 -10   4   1  445.26   28.70
   9  -4  -1    7.10    4.40
   9  -4  -1   10.10    5.40
  -9   4   1   21.50    8.20
   8  -4  -1   -4.20    2.60
   8  -4  -1    3.50    3.20
  -8   4   1    4.10    4.90
   7  -4  -1   94.39   10.00
   7  -4  -1   87.49    9.40
  -7   4   1   90.09   10.70
   6  -4  -1  137.69   10.90
   6  -4  -1  154.18   11.10
   6  -4  -1  146.09   12.80
  -6   4   1  167.18   13.30
   5  -4  -1    2.90    2.30
   5  -4  -1    7.40    3.20
   5  -4  -1    5.10    3.50
   5  -4  -1    1.50    4.10
  -5   4   1    1.90    2.40
  -5   4   1   -0.20    2.70
   4  -4  -1   89.49    7.60
   4  -4  -1   64.69    7.50
   4  -4  -1   82.39    6.60
   4  -4  -1   77.49    7.50
  -4   4   1   74.79    7.30
  -4   4   1   72.69    8.40
   3  -4  -1  564.44   17.90
   3  -4  -1  555.84   20.20
   3  -4  -1  582.24   20.70
   3  -4  -1  576.44   19.60
  -3   4   1  555.14   19.90
  -3   4   1  584.04   20.40
   2  -4  -1    0.80    1.60
   2  -4  -1    2.90    1.40
   2  -4  -1   -1.00    1.70
  -2   4   1   -0.50    1.00
  -2   4   1   -1.50    1.40
  -2   4   1    0.70    1.60
   1  -4  -1   34.80    2.60
   1  -4  -1   33.10    4.00
   1  -4  -1   28.80    3.20
  -1   4   1   29.00    3.40
  -1   4   1   31.00    4.00
   0  -4  -1    0.00    1.10
   0  -4  -1    0.40    1.00
   0  -4  -1   -0.20    1.40
   0   4   1    2.20    1.60
   0   4   1   -0.50    1.00
  -1  -4  -1   60.99    5.70
  -1  -4  -1   63.29    4.70
   1   4   1   57.69    4.30
   1   4   1   57.09    4.40
   1   4   1   62.09    4.60
   1   4   1   67.69    5.70
  -2  -4  -1   16.00    3.40
  -2  -4  -1   19.40    4.40
   2   4   1   13.40    3.60
   2   4   1   20.20    3.70
   2   4   1   18.30    3.60
   2   4   1   15.40    3.30
  -3  -4  -1  164.08   11.00
  -3  -4  -1  146.99   10.10
   3   4   1  165.38   10.60
   3   4   1  158.28    9.20
   3   4   1  144.39    9.50
   3   4   1  163.48   10.20
  -4  -4  -1    8.50    3.20
  -4  -4  -1    6.70    4.00
   4   4   1   13.60    5.00
   4   4   1   11.20    3.60
  -5  -4  -1    4.90    3.80
  -5  -4  -1   -0.10    3.40
   5   4   1    1.30    2.70
   5   4   1    0.70    4.20
  -6  -4  -1    8.60    4.30
  -6  -4  -1   11.40    6.00
   6   4   1    8.20    4.50
  -7  -4  -1  171.48   18.00
  -7  -4  -1  187.08   17.30
   7   4   1  198.68   15.50
  -8  -4  -1  196.98   18.90
   8   4   1  179.08   16.10
   8   4   1  214.18   17.70
   9   4   1   41.30   10.10
   9   4   1   31.20   10.00
  10   4   1    5.00    7.40
  10   4   1   -5.40    6.90
  11   4   1  312.57   28.80
  11   4   1  279.17   25.50
  12   4   1  125.39   22.70
  12   4   1  107.79   20.20
  13   4   1  -13.50   13.00
  13   4   1  -17.80   11.60
  13   4   1    7.30   14.00
  15  -5  -1   29.80   19.70
  15  -5  -1    5.80   11.40
  14  -5  -1  171.38   21.80
  14  -5  -1  132.29   20.40
 -14   5   1  146.39   22.20
  13  -5  -1  128.89   18.40
  13  -5  -1  150.28   19.50
 -13   5   1  159.78   21.70
  12  -5  -1   37.10    9.60
  12  -5  -1   38.40   10.30
 -12   5   1   44.60   13.40
  11  -5  -1   71.59   12.50
  11  -5  -1   72.09   13.20
 -11   5   1   81.99   16.70
  10  -5  -1    9.30    5.60
  10  -5  -1    3.30    5.60
 -10   5   1    4.80    6.80
   9  -5  -1  141.59   13.90
   9  -5  -1  125.39   13.70
  -9   5   1  152.88   15.70
   8  -5  -1  103.09   11.10
   8  -5  -1  103.59   14.10
  -8   5   1   87.29   11.60
   7  -5  -1  300.07   17.90
   7  -5  -1  300.47   17.20
  -7   5   1  340.47   20.50
   6  -5  -1   19.20    5.70
   6  -5  -1   28.50    6.50
  -6   5   1   30.20    7.00
   5  -5  -1  125.69   10.40
   5  -5  -1  139.59   11.50
   5  -5  -1  152.78    9.90
  -5   5   1  138.09   11.20
   4  -5  -1  406.96   18.20
   4  -5  -1  417.06   17.70
   4  -5  -1  438.46   16.10
   4  -5  -1  417.86   19.10
  -4   5   1  415.46   18.70
  -4   5   1  422.96   18.50
   3  -5  -1  791.02   25.90
   3  -5  -1  785.72   24.10
   3  -5  -1  752.82   22.20
   3  -5  -1  780.22   26.40
  -3   5   1  789.32   25.90
  -3   5   1  791.72   29.60
   2  -5  -1    9.90    2.10
   2  -5  -1   10.30    2.80
   2  -5  -1   14.30    3.60
  -2   5   1    4.60    2.40
  -2   5   1   10.80    2.10
  -2   5   1   13.40    3.10
   1  -5  -1   93.49    6.00
   1  -5  -1   97.89    7.30
   1  -5  -1   85.69    4.30
  -1   5   1   98.59    6.30
  -1   5   1   88.39    7.00
   0  -5  -1  145.09    9.20
   0  -5  -1  138.49    5.90
   0  -5  -1  129.29    6.50
   0   5   1  146.39    7.60
   0   5   1  147.69    9.20
   0   5   1  136.89    6.40
  -1  -5  -1 1267.07   32.20
  -1  -5  -1 1262.67   36.50
   1   5   1 1233.48   31.00
   1   5   1 1264.07   32.60
   1   5   1 1211.38   35.50
   1   5   1 1254.57   33.10
  -2  -5  -1   93.59    7.00
  -2  -5  -1  111.89    8.90
   2   5   1   96.99    8.30
   2   5   1   99.29    8.20
   2   5   1  104.79    7.60
   2   5   1  111.29    7.30
  -3  -5  -1  398.76   17.80
  -3  -5  -1  426.96   19.50
   3   5   1  405.56   17.00
   3   5   1  414.86   16.70
   3   5   1  405.96   17.40
   3   5   1  385.86   18.60
  -4  -5  -1   63.39    8.00
  -4  -5  -1   60.99    7.80
   4   5   1   66.39    8.30
   4   5   1   50.39    6.60
   4   5   1   49.99    7.80
  -5  -5  -1  368.46   21.20
  -5  -5  -1  302.27   19.00
   5   5   1  357.86   18.30
  -6  -5  -1   29.90    6.80
  -6  -5  -1   21.70    7.40
   6   5   1   22.70    6.40
  -7  -5  -1  273.27   21.10
   7   5   1  267.57   22.00
   7   5   1  265.57   19.00
   8   5   1  238.68   18.60
   8   5   1  248.28   19.00
   9   5   1   29.60    9.90
   9   5   1   23.50    9.20
  10   5   1    5.10    9.20
  10   5   1   14.50    8.80
  11   5   1  151.08   22.00
  11   5   1  117.89   20.00
  12   5   1    9.90   14.00
  12   5   1   25.20   15.20
  16  -6  -1   38.20   19.60
 -16   6   1   45.60   18.90
  15  -6  -1  120.99   23.00
 -15   6   1  132.99   23.30
  14  -6  -1   35.70   13.30
  14  -6  -1   30.40   12.40
 -14   6   1   11.90   11.30
  13  -6  -1    5.90    7.80
  13  -6  -1   21.60   10.10
 -13   6   1   -8.80    8.60
  12  -6  -1   81.19   14.90
  12  -6  -1   98.09   15.70
 -12   6   1   96.19   16.70
  11  -6  -1  252.67   21.20
  11  -6  -1  202.98   20.00
 -11   6   1  251.07   23.70
  10  -6  -1  124.99   14.30
  10  -6  -1  141.79   14.70
 -10   6   1  141.49   16.00
   9  -6  -1   36.70    8.20
   9  -6  -1   31.70    7.90
  -9   6   1   41.40    9.90
   8  -6  -1   -0.90    3.10
   8  -6  -1   -1.00    4.20
  -8   6   1    1.80    4.10
   7  -6  -1  233.98   16.10
   7  -6  -1  192.38   13.30
  -7   6   1  206.68   16.10
   6  -6  -1  246.58   16.30
   6  -6  -1  268.87   14.70
   6  -6  -1  277.07   16.80
  -6   6   1  283.37   17.40
   5  -6  -1  186.48   12.90
   5  -6  -1  195.98   11.10
   5  -6  -1  212.38   14.70
  -5   6   1  212.18   13.70
   4  -6  -1    5.50    2.80
   4  -6  -1    5.50    3.90
   4  -6  -1    0.40    1.90
   4  -6  -1   -0.50    2.80
  -4   6   1   -1.40    2.60
   3  -6  -1    2.90    1.80
   3  -6  -1    4.80    3.50
   3  -6  -1    3.30    2.40
   3  -6  -1    4.90    2.90
  -3   6   1    3.80    2.60
   2  -6  -1   16.50    3.20
   2  -6  -1   25.60    4.70
   2  -6  -1   20.00    2.80
   2  -6  -1   24.90    5.00
  -2   6   1   26.10    4.20
  -2   6   1   20.40    4.60
   1  -6  -1  257.47   11.00
   1  -6  -1  282.07    8.70
   1  -6  -1  305.47   14.60
  -1   6   1  294.27   12.40
  -1   6   1  266.07   13.90
  -1   6   1  282.97    8.50
   0  -6  -1  206.98   12.10
   0  -6  -1  218.58    8.00
   0  -6  -1  223.58    9.30
   0   6   1  232.88   10.70
   0   6   1  223.48   13.00
  -1  -6  -1  319.47   15.60
  -1  -6  -1  310.17   11.70
   1   6   1  324.87   19.30
   1   6   1  279.97   10.30
   1   6   1  298.07   12.30
   1   6   1  298.27   13.00
  -2  -6  -1  220.78   13.50
  -2  -6  -1  222.68   11.50
   2   6   1  235.58   10.70
   2   6   1  223.78   13.80
   2   6   1  209.48   11.50
   2   6   1  216.68   11.60
  -3  -6  -1  168.18   12.90
  -3  -6  -1  198.18   12.20
   3   6   1  182.48   11.30
   3   6   1  201.68   11.50
   3   6   1  188.28   11.70
  -4  -6  -1  209.28   14.10
  -4  -6  -1  203.08   14.80
   4   6   1  171.18   13.00
   4   6   1  178.48   12.20
   4   6   1  185.98   12.80
  -5  -6  -1   95.69   11.70
  -5  -6  -1   70.39   10.40
   5   6   1   93.39   10.00
  -6  -6  -1  228.28   19.30
   6   6   1  230.98   16.00
   6   6   1  267.47   17.80
  -7  -6  -1    8.30    7.20
   7   6   1   20.00    7.30
   7   6   1    2.30    6.10
  -8  -6  -1   14.80    9.40
   8   6   1   16.20    8.90
   8   6   1   17.40    7.50
   9   6   1   55.69   12.60
   9   6   1   72.69   13.40
  10   6   1  214.98   21.60
  10   6   1  254.17   24.60
  11   6   1    3.50   13.30
  11   6   1   37.50   14.30
  15  -7  -1   41.50   14.70
 -15   7   1   47.10   16.60
  14  -7  -1   11.90   11.10
  14  -7  -1    3.40   10.40
 -14   7   1    5.90   11.10
  13  -7  -1   18.20    9.00
  13  -7  -1   65.49   15.90
 -13   7   1   56.19   14.60
  12  -7  -1   35.30    9.10
  12  -7  -1   30.10    8.90
 -12   7   1   48.90   12.60
  11  -7  -1   54.49   11.70
  11  -7  -1   71.89   11.90
 -11   7   1   85.99   14.40
  10  -7  -1  101.99   13.40
  10  -7  -1  114.89   12.90
 -10   7   1  100.59   15.00
   9  -7  -1   48.40    9.50
   9  -7  -1   56.09    9.70
  -9   7   1   45.30   11.80
   8  -7  -1   11.30    5.00
   8  -7  -1   11.60    5.30
  -8   7   1    5.80   10.50
   7  -7  -1  386.36   19.70
  -7   7   1  454.05   24.70
   6  -7  -1  630.64   26.60
   6  -7  -1  644.84   24.30
   6  -7  -1  666.23   28.40
  -6   7   1  650.93   28.70
   5  -7  -1  179.08   13.20
   5  -7  -1  190.78   14.70
   5  -7  -1  180.08   12.80
   5  -7  -1  177.88   10.40
  -5   7   1  181.18   13.30
   4  -7  -1    0.00    1.50
   4  -7  -1    2.80    2.20
   4  -7  -1    7.00    3.40
  -4   7   1   -1.90    2.80
   3  -7  -1 1446.16   44.10
   3  -7  -1 1474.25   42.40
   3  -7  -1 1467.65   38.00
   3  -7  -1 1469.75   36.30
  -3   7   1 1503.65   42.70
   2  -7  -1 1521.85   35.50
   2  -7  -1 1505.65   41.10
   2  -7  -1 1552.84   45.20
   2  -7  -1 1563.54   36.40
  -2   7   1 1528.85   45.30
   1  -7  -1 1340.07   28.80
   1  -7  -1 1292.37   34.50
   1  -7  -1 1332.37   40.40
  -1   7   1 1298.47   36.50
   0  -7  -1  105.79    9.30
   0  -7  -1  101.89    4.40
   0  -7  -1   98.09    6.50
   0   7   1  105.29    4.10
   0   7   1  111.49    7.70
  -1  -7  -1 1218.18   31.20
  -1  -7  -1 1259.37   39.40
   1   7   1 1218.48   33.80
   1   7   1 1268.37   45.10
   1   7   1 1192.68   29.90
  -2  -7  -1 1721.63   44.40
  -2  -7  -1 1702.73   50.69
   2   7   1 1731.73   46.60
   2   7   1 1615.44   42.40
   2   7   1 1734.03   45.90
  -3  -7  -1  298.87   17.80
  -3  -7  -1  284.97   14.80
   3   7   1  290.57   15.60
  -4  -7  -1    7.70    5.00
  -4  -7  -1   -1.20    4.20
   4   7   1   12.40    5.40
   4   7   1    0.10    5.80
   4   7   1    9.20    3.90
  -5  -7  -1  328.77   21.80
   5   7   1  373.96   18.80
   5   7   1  370.46   19.90
  -6  -7  -1  577.14   31.40
   6   7   1  553.14   27.10
   6   7   1  589.34   26.30
  -7  -7  -1   74.09   15.00
   7   7   1  105.49   14.50
   7   7   1   94.69   13.00
  -8  -7  -1   11.20    9.10
   8   7   1    6.00    7.10
   8   7   1    2.50    7.30
   9   7   1    8.90   10.20
   9   7   1    7.50    9.00
  11   7   1   30.70   17.90
  15  -8  -1   15.70   11.60
  15  -8  -1   15.60   13.60
 -15   8   1   16.50   12.80
  14  -8  -1    0.50   10.60
  14  -8  -1   -5.40    9.70
 -14   8   1   -2.00   12.60
  13  -8  -1   -2.20    8.10
  13  -8  -1    2.20    9.20
 -13   8   1    8.90   10.60
  12  -8  -1   20.80   14.70
  12  -8  -1    6.70    8.20
 -12   8   1   27.00   12.00
  11  -8  -1   14.00    7.50
  11  -8  -1   17.30    9.00
 -11   8   1   10.50    7.50
  10  -8  -1   13.20    6.60
  10  -8  -1   31.20    7.50
 -10   8   1   17.00    8.50
   9  -8  -1   26.60    8.10
   9  -8  -1   35.10    8.60
  -9   8   1   33.40    9.60
   8  -8  -1    8.70    5.90
   8  -8  -1   15.90    5.80
  -8   8   1   23.20    8.50
   7  -8  -1    0.40    4.20
   7  -8  -1    7.30    3.90
  -7   8   1    9.90    5.70
   6  -8  -1   -4.80    2.50
   6  -8  -1    0.50    5.30
   6  -8  -1    1.20    3.80
  -6   8   1    1.70    4.00
   5  -8  -1   23.90    6.60
   5  -8  -1   24.70    5.70
   5  -8  -1   21.30    7.10
   5  -8  -1   25.50    4.50
  -5   8   1   24.70    6.50
   4  -8  -1   20.00    6.10
   4  -8  -1   20.70    6.40
   4  -8  -1   26.30    5.00
  -4   8   1   12.30    4.90
   3  -8  -1   49.40    7.50
   3  -8  -1   57.19    8.20
   3  -8  -1   50.79    4.20
   3  -8  -1   38.10    5.00
  -3   8   1   48.10    7.10
   2  -8  -1   31.00    5.50
   2  -8  -1   31.70    2.20
   2  -8  -1   33.70    6.30
   2  -8  -1   25.80    2.40
  -2   8   1   38.00    5.90
   1  -8  -1   39.00    6.40
   1  -8  -1   27.30    4.90
  -1   8   1   25.10    5.40
   0  -8  -1  183.88   13.00
   0  -8  -1  170.88    9.20
   0   8   1  163.28   11.60
  -1  -8  -1  151.48   11.80
   1   8   1  128.89    5.60
   1   8   1  131.09    9.50
  -2  -8  -1   27.70    7.50
   2   8   1   36.70    4.30
   2   8   1   31.40    6.30
   2   8   1   35.20    6.40
   2   8   1   32.30    4.90
  -3  -8  -1   22.00    6.70
   3   8   1   28.10    6.50
   3   8   1   18.80    6.70
   3   8   1   24.00    5.50
   3   8   1   25.50    4.60
  -4  -8  -1  167.88   15.30
   4   8   1  162.18   13.50
   4   8   1  156.38   11.30
   4   8   1  131.89   17.50
  -5  -8  -1   93.79   13.50
   5   8   1  103.69   12.50
   5   8   1   87.09    9.70
  -6  -8  -1   89.09   15.10
   6   8   1  125.59   12.90
   6   8   1  110.99   14.20
  -7  -8  -1  213.18   22.60
   7   8   1  204.18   19.50
   7   8   1  221.38   17.60
  -8  -8  -1  171.48   22.20
   8   8   1  155.08   19.30
   8   8   1  172.48   17.30
   9   8   1   55.09   13.10
   9   8   1   44.20   13.80
  10   8   1   73.09   18.70
  10   8   1   64.69   14.80
  15  -9  -1   -1.70   11.40
  15  -9  -1  -12.10   12.00
  14  -9  -1    0.70   10.50
 -14   9   1   16.00   14.00
  13  -9  -1   32.20   11.80
  13  -9  -1   19.30   11.10
 -13   9   1    8.40   11.70
  12  -9  -1  370.26   28.70
  12  -9  -1  376.96   26.00
 -12   9   1  344.07   28.60
  11  -9  -1  102.99   14.90
  11  -9  -1  114.19   16.70
 -11   9   1  115.79   17.00
  10  -9  -1    0.90    5.90
  10  -9  -1    9.00    5.70
 -10   9   1    4.80    7.80
   9  -9  -1  346.27   23.80
   9  -9  -1  355.26   21.30
  -9   9   1  336.17   24.30
   8  -9  -1 1082.79   38.60
   8  -9  -1 1077.29   43.80
  -8   9   1 1141.09   45.50
   7  -9  -1   73.29    8.80
   7  -9  -1  105.19   12.50
  -7   9   1  110.79   13.20
   6  -9  -1   78.89    7.90
   6  -9  -1   88.29   11.00
   6  -9  -1   96.69   12.60
  -6   9   1  111.89   12.30
   5  -9  -1  624.84   40.20
   5  -9  -1  544.65   22.70
   5  -9  -1  562.64   19.90
  -5   9   1  591.54   26.40
   4  -9  -1  549.05   18.90
   4  -9  -1  534.05   25.20
   4  -9  -1  526.65   17.10
   4  -9  -1  487.05   23.00
  -4   9   1  509.05   23.10
   3  -9  -1   -1.00    3.50
   3  -9  -1   -0.30    1.60
   3  -9  -1    2.20    5.00
  -3   9   1   -4.60    3.60
   2  -9  -1    9.60    4.40
   2  -9  -1   13.70    4.90
  -2   9   1   12.30    5.00
   1  -9  -1  139.89   12.20
   1  -9  -1  114.19    8.50
  -1   9   1  134.49   10.10
   0  -9  -1  381.56   20.30
   0   9   1  363.66   16.10
   0   9   1  327.97   14.80
  -1  -9  -1   63.09    9.20
   1   9   1   58.79    7.70
   1   9   1   66.19    7.80
  -2  -9  -1   50.49    9.20
   2   9   1   37.60    4.10
   2   9   1   41.40    7.60
   2   9   1   37.70    4.10
  -3  -9  -1   30.50    9.20
   3   9   1   35.40    5.40
   3   9   1   29.00    5.20
   3   9   1   25.10    6.60
  -4  -9  -1  128.09   14.60
   4   9   1  121.69    9.60
   4   9   1  147.09   13.90
  -5  -9  -1  176.78   17.90
   5   9   1  174.48   12.60
   5   9   1  177.88   16.40
  -6  -9  -1   26.70   11.00
   6   9   1   23.10    7.70
  -7  -9  -1   15.90   11.70
   7   9   1   33.30   10.10
   7   9   1   49.00   11.60
  -8  -9  -1   50.19   22.50
   8   9   1   42.40   14.80
   8   9   1   32.20   11.50
   9   9   1   32.90   21.70
  15 -10  -1   57.39   17.20
 -15  10   1   33.90   20.40
 -14  10   1   12.70   14.10
  13 -10  -1   -0.90   14.80
  13 -10  -1   17.00   10.70
 -13  10   1   30.00   13.00
  12 -10  -1   45.80   12.40
  12 -10  -1   59.19   12.90
 -12  10   1   23.70   15.50
  11 -10  -1   94.29   14.90
  11 -10  -1   61.89   22.20
 -11  10   1   90.69   17.60
  10 -10  -1    3.60    6.20
  10 -10  -1    9.20    7.40
 -10  10   1   12.80    9.80
   9 -10  -1    8.10    5.50
   9 -10  -1    5.80    6.30
  -9  10   1    8.10    6.90
   8 -10  -1    8.40    6.50
   8 -10  -1    1.30    4.40
  -8  10   1    6.10    6.40
   7 -10  -1   -0.30    3.90
   7 -10  -1   -6.40    4.80
  -7  10   1   -3.30    5.40
   6 -10  -1   93.09   12.20
   6 -10  -1   63.19   11.30
   6 -10  -1   83.29    8.50
  -6  10   1   73.79   10.40
   5 -10  -1   92.29    7.50
   5 -10  -1   78.79    9.30
   5 -10  -1  122.39   12.50
  -5  10   1   94.39   11.00
   4 -10  -1   24.50    4.00
   4 -10  -1   43.60    9.50
   4 -10  -1   16.10    3.70
   4 -10  -1   14.50    7.80
  -4  10   1   35.20    7.50
   3 -10  -1  307.37   16.50
   3 -10  -1  337.27   20.20
  -3  10   1  298.87   16.30
   2 -10  -1  120.99   19.00
   2 -10  -1  111.19    9.70
  -2  10   1  131.99   10.70
   1 -10  -1  125.49    9.30
  -1  10   1  144.99   10.70
   0 -10  -1    9.10    5.70
   0  10   1    9.40    4.80
  -1 -10  -1  163.68   14.80
   1  10   1  130.19   10.80
   1  10   1  125.69   10.80
  -2 -10  -1    1.20    5.10
   2  10   1    0.80    5.30
  -3 -10  -1   55.39   11.50
   3  10   1   32.90    6.20
   3  10   1   40.40    4.40
  -4 -10  -1   38.40   10.20
   4  10   1   41.00    9.50
  -5 -10  -1    8.70    8.80
   5  10   1    4.30    9.20
   6  10   1   24.50    8.70
   6  10   1   19.50   16.70
  -7 -10  -1    4.90   14.10
   7  10   1    6.80   13.10
  14 -11  -1   64.79   16.80
  13 -11  -1   14.20   11.60
  13 -11  -1    3.10   10.00
 -13  11   1   16.00   12.80
  12 -11  -1    2.00    9.30
  12 -11  -1   10.90   12.20
 -12  11   1   28.50   12.30
  11 -11  -1  179.48   20.50
  11 -11  -1  180.48   19.20
 -11  11   1  158.28   21.00
  10 -11  -1  250.07   19.60
  10 -11  -1  198.78   21.10
 -10  11   1  216.58   22.10
   9 -11  -1  266.67   18.10
   9 -11  -1  231.58   21.20
  -9  11   1  241.18   22.00
   8 -11  -1   10.80    5.60
   8 -11  -1   -2.00    6.10
  -8  11   1   -3.70    7.40
   7 -11  -1  153.78   15.90
   7 -11  -1  136.39   11.40
  -7  11   1  133.29   17.80
   6 -11  -1  276.87   19.50
   6 -11  -1  311.27   21.80
   6 -11  -1  303.97   14.00
  -6  11   1  276.27   19.20
   5 -11  -1  205.68    9.40
   5 -11  -1  160.78    9.90
   5 -11  -1  193.38   16.80
  -5  11   1  215.88   15.60
   4 -11  -1    2.10    4.40
   4 -11  -1    4.50   10.40
  -4  11   1    0.40    5.30
   3 -11  -1   38.10    8.10
   3 -11  -1   41.90    9.60
  -3  11   1   32.10    6.80
   2 -11  -1   85.39    9.40
   2 -11  -1  139.59   14.00
  -2  11   1  100.29    9.40
   1 -11  -1  156.78   14.90
  -1  11   1  157.88   11.70
   0 -11  -1   35.70    8.80
   0  11   1   50.89    9.80
  -1 -11  -1    2.60    5.70
   1  11   1    5.30    6.10
  -2 -11  -1   29.50    8.70
  -3 -11  -1  126.79   17.10
  -4 -11  -1   43.10   11.70
   4  11   1   19.30    9.60
  -6 -11  -1   49.50   16.20
  -7 -11  -1   52.69   18.50
  14 -12  -1   51.99   18.60
 -14  12   1   45.70   18.30
 -13  12   1   22.10   14.10
  12 -12  -1   10.00   10.50
  12 -12  -1    5.70    9.40
 -12  12   1   -8.70   12.30
  11 -12  -1    2.20    9.10
  11 -12  -1    0.60    9.60
 -11  12   1    3.20   10.90
  10 -12  -1   -1.70    8.40
 -10  12   1   -7.20    8.60
   9 -12  -1   45.70   11.50
  -9  12   1   60.79   12.80
   8 -12  -1   28.40    7.40
   8 -12  -1   35.00   10.20
  -8  12   1   14.00    9.60
   7 -12  -1   23.40    6.00
   7 -12  -1   31.20   13.30
   7 -12  -1   31.00    9.60
  -7  12   1   48.40   11.10
   6 -12  -1    5.40    5.90
   6 -12  -1    0.70    6.70
  -6  12   1    4.50    6.80
   5 -12  -1    1.90    5.80
  -5  12   1    2.60    6.20
   4 -12  -1   -1.20    5.80
  -4  12   1    9.30    6.30
   3 -12  -1   48.80    9.50
   3 -12  -1   32.50    8.60
   2 -12  -1    8.90    5.80
   2 -12  -1   11.10    6.70
   1 -12  -1   86.59   13.40
  -1  12   1   66.89    8.90
   0 -12  -1   24.90    8.20
  -1 -12  -1   73.09   14.30
   1  12   1   75.99   13.80
  -2 -12  -1   52.39   12.30
  -6 -12  -1   41.40   21.40
  13 -13  -1   34.40   14.90
 -13  13   1   61.89   19.40
  12 -13  -1   96.49   17.50
 -12  13   1   96.99   19.70
  11 -13  -1   36.40   12.20
  11 -13  -1   42.00   13.50
 -11  13   1   53.39   16.00
  10 -13  -1   -3.40    8.70
 -10  13   1    8.70   11.00
   9 -13  -1   38.60   11.50
  -9  13   1   55.59   12.90
  -8  13   1   92.89   15.80
   7 -13  -1   52.49   12.00
   7 -13  -1   26.70    7.30
  -7  13   1   28.80    9.90
   6 -13  -1   16.80    8.00
  -6  13   1    1.70    8.00
   5 -13  -1   33.80   10.20
  -5  13   1   27.90    8.70
   4 -13  -1  103.19   14.90
  -4  13   1  106.39   12.40
   3 -13  -1   91.19   14.30
   2 -13  -1   17.70    8.30
   1 -13  -1  111.49   15.90
   0 -13  -1  345.57   24.60
  -3 -13  -1   83.79   16.80
  -4 -13  -1  107.89   20.40
  12 -14  -1   -0.30   16.50
  12 -14  -1    8.70   13.20
 -12  14   1    5.10   15.90
  11 -14  -1  -10.50   13.20
  11 -14  -1   28.40   14.10
 -11  14   1   22.70   14.80
  10 -14  -1    9.00   11.50
  10 -14  -1   -2.30   11.00
   9 -14  -1   -1.80    9.30
  -9  14   1   -5.20   10.90
   8 -14  -1   20.90    9.70
  -8  14   1   -5.70    9.90
   7 -14  -1    9.40    9.10
  -7  14   1   -3.00    9.30
  -6  14   1   -8.50   12.30
   5 -14  -1   11.00   10.20
  -5  14   1   -2.10    8.50
   4 -14  -1   39.50   10.80
  -4  14   1   35.60    9.50
   3 -14  -1    3.50    8.30
   2 -14  -1   18.00   11.30
   1 -14  -1    7.30    9.50
   0 -14  -1   17.70   11.30
  -1 -14  -1   26.80   20.10
  -2 -14  -1   27.00   15.10
  11 -15  -1   38.60   28.50
 -11  15   1   19.60   16.70
  10 -15  -1  139.79   23.60
 -10  15   1  112.99   27.30
   9 -15  -1   41.00   14.10
  -9  15   1   38.20   14.10
  -8  15   1  -12.70   11.80
   7 -15  -1   41.20   11.80
  -7  15   1   29.90   12.80
   6 -15  -1   80.39   16.50
   5 -15  -1   -1.40   10.80
   4 -15  -1   -8.90    9.50
   3 -15  -1   64.99   15.70
   2 -15  -1  112.79   20.20
   1 -15  -1   28.90   11.70
   0 -15  -1  -12.10   14.40
   8 -16  -1    3.00   13.10
   7 -16  -1   28.20   13.40
   6 -16  -1    3.20   12.60
   5 -16  -1   15.00   21.50
   4 -16  -1   35.50   20.00
   3 -16  -1   29.20   16.40
   2 -16   2   45.60   16.70
   3 -16   2   58.79   17.20
   4 -16   2   14.80   12.70
   5 -16   2   52.89   15.70
  -8  16  -2   46.00   17.10
   8 -16   2   -8.90   12.20
  -9  16  -2   80.69   20.90
   9 -16   2   93.09   18.70
  -1 -15   2   19.20   17.70
   0 -15   2   10.70   14.80
   1 -15   2    0.20   13.00
   2 -15   2   69.99   15.40
  -4  15  -2   25.10   12.80
   4 -15   2   18.20   10.10
  -5  15  -2   26.50   12.40
   5 -15   2   13.10   10.30
  -6  15  -2   60.09   15.00
   6 -15   2   80.49   16.50
  -7  15  -2   36.60   14.10
   7 -15   2   40.30   13.70
  -8  15  -2  -14.00   12.30
   8 -15   2    4.90   10.60
   9 -15   2    9.70   11.90
 -10  15  -2   26.50   15.50
  10 -15   2   14.50   12.20
  -3 -14   2   18.60   17.80
  -2 -14   2   21.30   13.80
  -1 -14   2  136.39   21.30
   0 -14   2   90.69   17.80
  -1  14  -2    9.90   10.10
   1 -14   2   -2.30    8.10
  -2  14  -2   12.70    9.60
  -3  14  -2   25.40   10.20
   3 -14   2   17.70    9.50
  -4  14  -2   31.00   11.80
   4 -14   2   32.90   10.80
  -5  14  -2    8.20    9.20
   5 -14   2   -1.90    7.60
  -6  14  -2    1.30    9.30
   6 -14   2  -13.10    7.60
  -7  14  -2   11.10   12.40
   7 -14   2   11.70    9.70
  -8  14  -2   46.80   13.50
   8 -14   2   87.39   16.40
  -9  14  -2   13.50   13.60
   9 -14   2   41.40   14.30
 -10  14  -2   13.90   13.20
  10 -14   2    7.90   10.50
  10 -14   2    2.70   10.80
 -11  14  -2  103.99   21.40
  11 -14   2   83.69   15.80
  11 -14   2   87.79   17.40
 -12  14  -2  134.79   25.20
  12 -14   2  129.99   24.90
  -4 -13   2    5.30   15.40
  -3 -13   2   55.69   14.50
   2  13  -2   -3.80    9.90
  -2 -13   2    6.30   10.50
   1  13  -2   -0.30    9.20
  -1 -13   2   -1.50    8.20
   0  13  -2   10.90    8.70
   0 -13   2   17.20    8.60
  -1  13  -2    9.80    7.80
   1 -13   2    3.70    7.40
  -2  13  -2   49.80   11.10
  -3  13  -2   11.20    8.30
   3 -13   2    2.40    6.20
  -4  13  -2   13.30    8.20
   4 -13   2   11.20    7.70
  -5  13  -2   32.40   10.40
   5 -13   2   22.50    8.50
  -6  13  -2    9.00    8.60
   6 -13   2    7.70    7.30
  -7  13  -2  -12.70    7.80
   7 -13   2   -6.00    6.60
   7 -13   2   -6.20    4.20
  -8  13  -2    0.80   10.20
   8 -13   2   -6.90    7.10
  -9  13  -2   22.90   12.10
   9 -13   2   35.40   11.00
 -10  13  -2   49.60   15.30
  10 -13   2   33.00   12.30
 -11  13  -2    5.80   11.70
  11 -13   2   -5.00    8.90
  11 -13   2   10.50   11.50
 -12  13  -2   -3.60   12.80
  12 -13   2   18.40   12.00
  12 -13   2   -4.10   12.20
 -13  13  -2   26.20   15.80
  13 -13   2    9.10   15.60
  -6 -12   2   -0.90   18.50
  -5 -12   2   20.80   13.80
   4  12  -2   -1.60   12.10
   3  12  -2    2.20    9.40
  -3 -12   2   19.80   10.30
   2  12  -2  110.49   15.70
  -2 -12   2   95.09   14.80
   1  12  -2   46.60    9.70
  -1 -12   2   33.60    9.20
   0  12  -2   10.80    8.40
   0 -12   2   17.20    7.50
  -1  12  -2  175.78   15.30
   1 -12   2  166.88   15.30
  -2  12  -2  390.76   22.50
   2 -12   2  379.76   22.70
  -3  12  -2  336.37   21.70
   3 -12   2  330.77   20.80
  -4  12  -2   19.10    8.10
   4 -12   2    6.00    6.10
  -5  12  -2  142.89   18.10
   5 -12   2  167.68   16.50
  -6  12  -2  255.57   20.50
   6 -12   2  210.18    9.60
   6 -12   2  248.48   19.60
  -7  12  -2  157.98   18.10
   7 -12   2  159.08   15.50
   7 -12   2  143.59   10.50
   7 -12   2  163.88   17.20
  -8  12  -2   19.00   10.60
   8 -12   2   19.20    6.40
   8 -12   2   21.30    8.60
  -9  12  -2   42.90   14.80
   9 -12   2   33.30    9.10
   9 -12   2   60.49   11.60
 -10  12  -2  239.58   24.30
  10 -12   2  195.08   21.70
 -11  12  -2  200.58   25.30
  11 -12   2  176.88   19.00
  11 -12   2  162.68   21.80
 -12  12  -2   79.69   17.50
  12 -12   2   71.39   20.20
  12 -12   2   86.49   16.40
  14 -12   2  130.59   24.50
   7  11  -2   59.59   19.50
   6  11  -2   62.49   15.30
  -6 -11   2   21.60   12.90
   5  11  -2  201.08   21.70
  -5 -11   2  180.98   20.70
  -4 -11   2   29.10   10.30
   3  11  -2   68.99   13.70
  -3 -11   2   58.79   11.60
   2  11  -2  149.99   15.50
  -2 -11   2  165.78   15.50
   1  11  -2  181.48   16.30
  -1 -11   2  146.79   16.30
   0  11  -2   19.70    7.30
   0 -11   2   18.50    6.80
  -1  11  -2  185.88   15.40
   1 -11   2  232.58   16.30
  -2  11  -2   42.80    9.30
   2 -11   2   44.90    9.00
  -3  11  -2   22.80    7.20
   3 -11   2   26.00    8.40
  -4  11  -2   26.10    8.70
   4 -11   2   14.60    6.60
  -5  11  -2   97.69   13.70
   5 -11   2  100.39   12.60
   5 -11   2   86.39    5.10
   5 -11   2   86.49    6.60
  -6  11  -2    7.60    7.20
   6 -11   2    4.70    3.30
   6 -11   2    1.00    4.70
   6 -11   2    1.40    5.60
  -7  11  -2   22.40    8.80
   7 -11   2   29.40    8.10
   7 -11   2   26.90    6.20
   7 -11   2   26.30    9.30
  -8  11  -2   -7.60    6.40
   8 -11   2    6.30    6.60
   8 -11   2    0.80    4.70
  -9  11  -2   14.40    9.80
   9 -11   2    8.10    7.10
   9 -11   2   -0.40    6.90
 -10  11  -2   23.10   10.00
  10 -11   2   12.10    7.80
  10 -11   2    8.50    7.80
 -11  11  -2   74.19   16.10
  11 -11   2  110.29   18.20
  11 -11   2   83.49   15.00
 -12  11  -2   36.30   12.60
  12 -11   2   48.30   15.30
  12 -11   2   15.40    9.80
 -13  11  -2   12.80   12.60
  13 -11   2    0.10   10.30
  13 -11   2    4.20   11.50
 -14  11  -2   12.30   13.10
  14 -11   2    9.20   16.80
  14 -11   2  -20.30   12.30
   8  10  -2    7.50   14.20
   7  10  -2   -9.60   11.30
   6  10  -2    7.70   10.20
   6  10  -2    2.30    7.20
  -6 -10   2   16.00   10.80
   5  10  -2   85.79   16.30
  -5 -10   2   48.70   11.00
   4  10  -2   10.70    8.40
   4  10  -2    6.40    4.10
   4  10  -2   10.00    3.20
  -4 -10   2    3.30    6.90
   3  10  -2   15.00    8.50
  -3 -10   2   23.00    7.60
   2  10  -2    2.30    5.80
  -2 -10   2   10.00    5.50
   1  10  -2  183.38   15.10
  -1 -10   2  172.68   13.60
   0  10  -2  242.78   16.40
   0 -10   2  248.08   15.60
   0 -10   2  200.58   18.30
  -1  10  -2  213.88   15.40
   1 -10   2  213.58   14.90
   1 -10   2  220.18   14.70
  -2  10  -2    3.20    5.00
   2 -10   2    2.20    4.10
  -3  10  -2  571.14   26.80
   3 -10   2  558.24   25.40
  -4  10  -2 1090.79   41.20
   4 -10   2 1088.89   39.10
  -5  10  -2  263.07   18.70
   5 -10   2  249.78   12.20
   5 -10   2  253.07   11.40
   5 -10   2  266.27   18.50
  -6  10  -2   43.60    9.20
   6 -10   2   24.90    5.50
   6 -10   2   28.00    7.10
   6 -10   2   23.80    6.80
  -7  10  -2  391.96   25.90
   7 -10   2  419.56   24.60
   7 -10   2  413.06   19.00
  -8  10  -2  346.17   25.30
   8 -10   2  360.56   23.60
   8 -10   2  344.87   18.80
  -9  10  -2   51.19   12.40
   9 -10   2   51.59   10.30
   9 -10   2   60.89   12.90
 -10  10  -2   46.50   11.40
  10 -10   2   40.50    9.50
  10 -10   2   60.49   11.50
 -11  10  -2   47.20   11.90
  11 -10   2   49.80   12.40
  11 -10   2   56.09   12.30
 -12  10  -2   56.89   14.40
  12 -10   2   85.19   17.40
  12 -10   2   72.79   14.50
 -13  10  -2   22.00   12.10
  13 -10   2   25.10   13.30
 -14  10  -2   -1.90   12.30
  14 -10   2   15.80   13.00
  15 -10   2   21.70   15.30
   9   9  -2   54.99   14.80
   8   9  -2  166.08   23.60
   8   9  -2  163.28   17.70
   7   9  -2   55.79   13.00
  -7  -9   2   65.59   14.40
   6   9  -2  114.59   12.00
   6   9  -2  129.89   16.70
  -6  -9   2  161.38   17.80
   5   9  -2   28.10   11.20
  -5  -9   2   63.99   12.20
   4   9  -2  351.26   22.00
   4   9  -2  314.37   13.60
  -4  -9   2  280.77   19.50
   3   9  -2   79.69    5.20
   3   9  -2   80.69    5.70
   3   9  -2   76.99   11.10
  -3  -9   2   78.89   10.50
   2   9  -2   59.29    9.70
  -2  -9   2   61.99    8.40
   1   9  -2   43.50    8.60
   1   9  -2   14.70    5.70
  -1  -9   2   26.80    5.90
   0   9  -2  180.78   13.60
   0  -9   2  185.68   12.50
   0  -9   2  192.48   12.90
  -1   9  -2  117.29   10.90
   1  -9   2  102.39   10.30
   1  -9   2  119.59   10.10
  -2   9  -2  156.48   13.20
   2  -9   2  136.29   11.50
   2  -9   2  143.79   12.30
  -3   9  -2  101.39   11.20
   3  -9   2   87.09    9.50
   3  -9   2   79.49   11.60
  -4   9  -2  365.06   21.30
   4  -9   2  363.96   13.10
   4  -9   2  390.36   20.20
   4  -9   2  367.46   12.30
  -5   9  -2  318.27   20.70
   5  -9   2  345.97   19.50
   5  -9   2  316.37   13.50
   5  -9   2  298.07   14.60
  -6   9  -2  296.57   20.60
   6  -9   2  334.77   29.50
   6  -9   2  264.37   16.40
   6  -9   2  285.87   14.30
  -7   9  -2  156.38   18.20
   7  -9   2  100.29   11.80
   7  -9   2  107.19    9.70
  -8   9  -2   12.00    6.00
   8  -9   2    5.10    4.60
   8  -9   2    6.80    4.90
  -9   9  -2   17.40    6.90
   9  -9   2    9.50    5.60
   9  -9   2    5.90    5.50
 -10   9  -2    8.10    8.50
  10  -9   2    5.40    5.90
  10  -9   2    9.50    5.20
 -11   9  -2   52.49   13.40
  11  -9   2   39.40   11.40
  11  -9   2   49.40   11.20
 -12   9  -2   88.69   19.80
  12  -9   2  113.19   16.30
  12  -9   2  116.39   17.70
 -13   9  -2    1.60    9.90
  13  -9   2   -8.40    8.40
  13  -9   2   15.50   10.30
 -14   9  -2   -5.20   12.60
  14  -9   2   14.40   14.10
  14  -9   2   11.40   11.50
 -15   9  -2    8.10   13.80
  15  -9   2   -0.20   12.60
  10   8  -2   10.20   12.80
  10   8  -2   53.99   16.50
   9   8  -2  121.49   21.40
   9   8  -2  140.09   17.80
   8   8  -2   29.30   11.00
   8   8  -2   18.60    8.70
   7   8  -2   51.19   12.10
   7   8  -2   64.49   13.30
  -7  -8   2   85.39   16.30
   6   8  -2  582.24   30.70
   6   8  -2  602.64   25.20
  -6  -8   2  584.04   30.60
   5   8  -2  249.08   14.10
   5   8  -2  265.87   19.20
  -5  -8   2  246.58   18.90
   4   8  -2   23.20    7.60
   4   8  -2   22.00    4.80
  -4  -8   2   22.80    7.30
   3   8  -2  194.48   10.20
   3   8  -2  200.88   15.60
   3   8  -2  206.08    9.40
  -3  -8   2  209.18   13.90
   2   8  -2 1404.16   44.90
   2   8  -2 1379.56   31.80
  -2  -8   2 1455.65   43.50
   1   8  -2  192.08   13.60
  -1  -8   2  167.58   11.00
  -1  -8   2  198.38   12.30
   0   8  -2   64.49    8.60
   0   8  -2   87.99    8.70
   0  -8   2   75.59    8.30
   0  -8   2   69.69    7.60
  -1   8  -2  397.46   18.50
  -1   8  -2  425.66   20.20
   1  -8   2  434.06   18.80
   1  -8   2  443.46   19.10
  -2   8  -2 1110.89   37.10
  -2   8  -2 1218.78   39.30
   2  -8   2 1182.68   36.80
   2  -8   2 1178.08   37.30
  -3   8  -2  271.37   16.50
   3  -8   2  253.27   14.70
   3  -8   2  256.07    8.00
   3  -8   2  275.47   16.80
  -4   8  -2   50.49    8.40
   4  -8   2   30.50    5.90
   4  -8   2   25.10    4.50
   4  -8   2   27.60    4.10
  -5   8  -2   92.29   11.20
   5  -8   2  102.69   10.30
   5  -8   2   98.59    7.70
   5  -8   2  100.39    9.30
  -6   8  -2  154.88   14.60
   6  -8   2  127.89    9.90
   6  -8   2  123.99   11.90
   6  -8   2  151.58   13.20
  -7   8  -2  195.08   17.50
   7  -8   2  217.88   16.70
   7  -8   2  176.38   12.80
  -8   8  -2   -8.90    4.90
   8  -8   2    1.60    4.20
   8  -8   2    4.70    4.50
  -9   8  -2  235.98   20.80
   9  -8   2  243.58   17.50
   9  -8   2  218.78   18.00
 -10   8  -2  153.68   18.30
  10  -8   2  173.28   16.10
  10  -8   2  159.18   17.20
 -11   8  -2  120.19   18.80
  11  -8   2   86.19   15.30
  11  -8   2   98.39   15.30
 -12   8  -2   36.70   13.40
  12  -8   2   39.80   11.50
  12  -8   2   15.40   14.90
 -13   8  -2  267.17   28.00
  13  -8   2  225.28   24.80
  13  -8   2  241.18   24.60
 -14   8  -2   86.39   20.40
  14  -8   2  112.49   21.00
 -15   8  -2   61.79   18.40
  15  -8   2   29.70   16.50
  15  -8   2   90.19   18.50
  11   7  -2    2.40   13.80
  10   7  -2  114.59   18.90
  10   7  -2  147.39   22.30
   9   7  -2  108.29   19.20
   9   7  -2  117.19   16.40
   8   7  -2   46.80   10.90
   8   7  -2   71.69   12.40
   7   7  -2   52.79   11.40
  -7  -7   2   52.79   11.40
   6   7  -2  209.38   14.30
   6   7  -2  189.78   17.70
  -6  -7   2  192.18   17.20
   5   7  -2  574.34   23.20
   5   7  -2  591.14   27.80
  -5  -7   2  606.54   27.80
   4   7  -2   41.70    7.90
   4   7  -2   51.99    8.70
   4   7  -2   45.60    6.20
  -4  -7   2   63.69    8.20
   3   7  -2   98.99   10.50
   3   7  -2  112.19   10.30
   3   7  -2  136.29    8.40
  -3  -7   2  137.09   10.90
   2   7  -2   -1.50    2.10
   2   7  -2   -1.10    4.10
   2   7  -2    0.80    3.40
   2   7  -2    0.20    3.30
   2   7  -2    2.90    2.00
  -2  -7   2   -2.30    2.60
   1   7  -2   21.80    5.20
   1   7  -2   31.60    6.10
  -1  -7   2   33.80    5.40
   0   7  -2  118.99    9.90
   0  -7   2  115.29    8.80
   0  -7   2  130.49    9.10
  -1   7  -2   16.40    5.10
  -1   7  -2   29.00    5.70
   1  -7   2   21.10    5.20
   1  -7   2   29.10    4.90
  -2   7  -2  445.26   19.90
  -2   7  -2  408.16   17.70
   2  -7   2  370.36   18.00
   2  -7   2  436.26   17.80
  -3   7  -2   20.60    5.30
   3  -7   2    3.10    2.80
   3  -7   2   11.90    3.00
   3  -7   2   14.40    5.10
   3  -7   2   12.00    2.40
  -4   7  -2   45.00    7.30
   4  -7   2   34.40    6.30
   4  -7   2   36.50    5.30
   4  -7   2   44.20    6.70
   4  -7   2   39.80    8.00
  -5   7  -2   23.60    6.50
   5  -7   2   30.20    5.90
   5  -7   2   27.80    4.90
   5  -7   2   33.40    6.20
  -6   7  -2  155.38   14.40
   6  -7   2  190.88   11.90
   6  -7   2  167.88   13.20
   6  -7   2  173.88   13.30
  -7   7  -2    2.40    3.90
   7  -7   2   -0.90    3.00
   7  -7   2   -0.50    3.60
  -8   7  -2   60.19   10.80
   8  -7   2   71.89   10.20
   8  -7   2   90.29   10.20
  -9   7  -2   52.39   12.90
   9  -7   2   45.50    9.60
   9  -7   2   50.69   10.70
 -10   7  -2    8.30    7.70
  10  -7   2    4.50    6.70
  10  -7   2    1.80    4.50
 -11   7  -2   94.19   16.00
  11  -7   2   84.59   13.70
  11  -7   2   97.19   13.80
 -12   7  -2  104.99   18.30
  12  -7   2   78.09   15.30
  12  -7   2  107.59   17.10
 -13   7  -2   37.80   13.30
  13  -7   2   38.20   12.80
  13  -7   2   60.09   14.00
 -14   7  -2   -5.00   10.10
  14  -7   2   -2.30   10.00
  14  -7   2   -3.70    9.10
 -15   7  -2   78.29   21.00
  15  -7   2  122.39   22.00
  12   6  -2  -48.10   13.50
  12   6  -2  -22.00   12.70
  11   6  -2    0.00   10.40
  11   6  -2   18.20   12.60
  10   6  -2   29.10   13.50
  10   6  -2   63.59   13.10
   9   6  -2  134.49   15.80
   9   6  -2   99.99   17.00
   8   6  -2   48.20   10.00
   8   6  -2   41.50    9.80
   7   6  -2   10.80    6.20
   7   6  -2    4.00    4.70
   6   6  -2  141.19   14.10
   6   6  -2  119.49   11.60
  -6  -6   2  123.19   13.00
   5   6  -2   30.30    6.30
   5   6  -2   21.40    6.70
  -5  -6   2   27.00    7.40
   4   6  -2   58.69    8.50
   4   6  -2   57.99    6.60
   4   6  -2   59.39    9.00
  -4  -6   2   38.20    7.10
   3   6  -2   27.70    6.00
   3   6  -2   28.60    5.60
   3   6  -2   26.90    5.40
   3   6  -2   34.20    7.00
   3   6  -2   20.80    4.00
  -3  -6   2   26.20    5.50
   2   6  -2  199.38    8.40
   2   6  -2  201.58   14.60
   2   6  -2  174.38   10.40
   2   6  -2  210.48   12.70
   2   6  -2  207.48    9.20
  -2  -6   2  196.08   11.40
   1   6  -2 1344.07   30.00
   1   6  -2 1309.07   36.70
   1   6  -2 1387.46   40.00
   1   6  -2 1377.56   29.80
  -1  -6   2 1338.57   37.20
  -1  -6   2 1303.47   36.80
   0   6  -2  230.78   11.50
   0   6  -2  256.37   13.30
   0  -6   2  255.37   12.00
   0  -6   2  246.98   12.30
  -1   6  -2  370.86   17.10
   1  -6   2  377.86   16.20
   1  -6   2  398.96   15.50
  -2   6  -2  229.98   11.70
  -2   6  -2  226.88   13.30
   2  -6   2  215.98   12.60
   2  -6   2  228.18    6.80
   2  -6   2  217.08    7.10
   2  -6   2  218.18   11.60
  -3   6  -2 2481.65   64.39
  -3   6  -2 2341.37   60.89
   3  -6   2 2367.66   54.79
   3  -6   2 2375.96   63.39
   3  -6   2 2343.77   60.69
   3  -6   2 2350.96   55.89
  -4   6  -2   62.79    8.10
  -4   6  -2   64.39    7.20
   4  -6   2   58.39    6.70
   4  -6   2   60.29    6.50
   4  -6   2   62.39    8.20
   4  -6   2   55.39    5.40
  -5   6  -2  177.98   13.70
   5  -6   2  153.08   11.40
   5  -6   2  168.88   10.30
   5  -6   2  169.78   12.10
  -6   6  -2  111.89   11.70
   6  -6   2  120.69   10.60
   6  -6   2  111.89   11.20
   6  -6   2  105.89    9.40
  -7   6  -2   48.00    8.80
   7  -6   2   53.39    7.80
   7  -6   2   43.00    6.90
  -8   6  -2   35.00    8.60
   8  -6   2   25.00    6.90
   8  -6   2   36.00    7.80
  -9   6  -2   49.99    9.90
   9  -6   2   44.70    8.90
   9  -6   2   54.49    9.70
 -10   6  -2  124.39   17.10
  10  -6   2  161.18   15.90
  10  -6   2  176.48   17.00
 -11   6  -2   60.09   14.30
  11  -6   2   59.59   11.90
  11  -6   2   64.09   13.50
 -12   6  -2  274.57   26.30
  12  -6   2  288.37   24.70
  12  -6   2  241.38   22.50
 -13   6  -2  133.29   20.70
  13  -6   2  123.99   19.20
  13  -6   2  123.19   18.90
 -14   6  -2   72.19   17.20
  14  -6   2   80.69   18.00
  14  -6   2   86.09   18.10
  15  -6   2   50.39   15.70
  12   5  -2   51.19   13.00
  12   5  -2   48.00   15.00
  12   5  -2   11.90   14.60
  11   5  -2  177.58   21.40
  11   5  -2  217.98   24.20
  10   5  -2   16.90    9.00
  10   5  -2   -0.90    9.20
   9   5  -2   70.29   12.90
   8   5  -2   -2.80    4.80
   8   5  -2   -1.30    5.50
   7   5  -2  450.85   25.00
   7   5  -2  450.55   23.20
   6   5  -2  280.47   18.00
   6   5  -2  245.08   15.70
  -6  -5   2  228.28   17.20
   5   5  -2   35.10    7.20
   5   5  -2   23.10    5.50
   5   5  -2   16.50    6.10
  -5  -5   2   24.90    6.70
   4   5  -2   27.10    7.20
   4   5  -2   37.50    6.20
   4   5  -2   30.40    6.20
   4   5  -2   35.40    7.00
   4   5  -2   28.60    4.90
  -4  -5   2   35.30    7.00
   3   5  -2  731.63   26.70
   3   5  -2  705.73   24.10
   3   5  -2  713.63   24.00
   3   5  -2  752.02   26.70
   3   5  -2  761.92   23.00
  -3  -5   2  748.63   25.60
   2   5  -2  228.08   10.70
   2   5  -2  215.68    9.80
   2   5  -2  223.58   12.30
   2   5  -2  195.28   11.50
   2   5  -2  218.58    9.10
  -2  -5   2  216.88   10.90
   1   5  -2   81.19    6.00
   1   5  -2   86.39    4.00
   1   5  -2   81.99    4.70
   1   5  -2   99.69    7.90
  -1  -5   2   84.99    6.60
   0   5  -2   20.90    3.30
   0   5  -2   14.10    4.40
   0  -5   2   19.40    3.30
   0  -5   2   19.90    4.30
  -1   5  -2  123.79    7.50
   1  -5   2  127.99    8.80
   1  -5   2  126.59    8.40
  -2   5  -2   18.00    4.40
  -2   5  -2   19.10    3.80
   2  -5   2   16.30    3.10
   2  -5   2   17.90    2.50
   2  -5   2   17.00    4.80
   2  -5   2   15.00    2.00
  -3   5  -2  182.08   10.10
  -3   5  -2  162.18    9.10
  -3   5  -2  175.88   11.60
   3  -5   2  163.78    9.90
   3  -5   2  185.58    9.20
   3  -5   2  167.18   11.60
  -4   5  -2   43.90    5.30
  -4   5  -2   37.80    5.30
  -4   5  -2   30.70    5.90
   4  -5   2   30.70    6.60
   4  -5   2   30.10    4.80
   4  -5   2   31.50    5.30
  -5   5  -2  180.78   12.40
  -5   5  -2  164.08   12.90
   5  -5   2  169.68   11.50
   5  -5   2  172.68   13.70
  -6   5  -2   35.90    7.70
  -6   5  -2   39.30    7.40
   6  -5   2   32.70    6.20
  -7   5  -2   21.20    6.60
  -7   5  -2   21.00    6.30
   7  -5   2   12.20    4.20
  -8   5  -2   54.49   14.50
  -8   5  -2   74.79   11.20
  -9   5  -2  210.28   19.00
   9  -5   2  223.08   17.20
   9  -5   2  193.78   16.70
 -10   5  -2  110.99   15.20
  10  -5   2   90.29   12.40
  10  -5   2   94.69   13.70
 -11   5  -2   -1.90    6.00
  11  -5   2    3.20    5.30
  11  -5   2    2.00    5.80
 -12   5  -2    7.20    7.90
  12  -5   2    3.70    6.10
  12  -5   2    2.80    5.80
 -13   5  -2   -3.80    8.80
  13  -5   2    6.40    7.70
  13  -5   2  -11.10    8.10
 -14   5  -2  151.58   24.80
  14  -5   2   96.79   18.60
  14  -5   2  120.09   20.90
  15  -5   2   85.49   19.10
  13   4  -2  -25.70   10.10
  13   4  -2   31.90   13.50
  13   4  -2   -1.50   13.00
  12   4  -2   31.60   13.50
  12   4  -2   65.59   15.60
  12   4  -2   64.29   14.40
  11   4  -2  123.99   18.50
  11   4  -2  150.88   33.10
  11   4  -2  146.39   17.40
  10   4  -2  101.89   15.00
  10   4  -2  118.59   16.40
   9   4  -2    7.10    5.40
   9   4  -2   12.30    6.20
   8   4  -2  128.09   15.00
   8   4  -2  154.38   14.70
   7   4  -2  257.87   17.60
   6   4  -2    2.10    3.50
   6   4  -2    5.90    3.80
  -6  -4   2    1.00    3.80
   5   4  -2  246.98   13.90
   5   4  -2  246.88   15.00
   5   4  -2  241.28   13.80
   5   4  -2  204.78   14.80
  -5  -4   2  262.67   15.70
   4   4  -2  143.09    9.70
   4   4  -2  142.19   10.20
   4   4  -2  137.09   10.30
   4   4  -2  128.79   13.10
   4   4  -2  136.69    9.30
  -4  -4   2  128.99   10.00
   3   4  -2  634.74   22.60
   3   4  -2  626.14   21.50
   3   4  -2  605.84   20.50
   3   4  -2  597.04   19.90
  -3  -4   2  586.34   21.30
   2   4  -2  898.91   25.60
   2   4  -2  906.41   25.80
   2   4  -2  924.71   24.70
   2   4  -2  945.71   28.60
   2   4  -2  902.21   28.10
  -2  -4   2  972.80   26.90
   1   4  -2   17.30    1.90
   1   4  -2   16.30    2.90
   1   4  -2   16.30    3.40
  -1  -4   2   18.00    2.80
  -1  -4   2   17.10    3.40
   0   4  -2  150.98    7.20
   0   4  -2  162.88    9.00
   0  -4   2  154.58    7.20
   0  -4   2  173.18    8.70
  -1   4  -2 1137.89   32.10
  -1   4  -2 1109.19   29.30
   1  -4   2 1131.89   29.30
   1  -4   2 1126.49   24.50
   1  -4   2 1124.99   24.60
   1  -4   2 1138.49   31.50
  -2   4  -2 8512.35  177.78
  -2   4  -2 8295.07  179.68
  -2   4  -2 8424.46  183.88
   2  -4   2 8227.58  177.08
   2  -4   2 8438.56  180.08
   2  -4   2 8390.46  182.88
  -3   4  -2  428.86   18.30
  -3   4  -2  416.16   15.80
  -3   4  -2  415.16   15.80
   3  -4   2  410.36   15.40
   3  -4   2  414.66   18.00
   3  -4   2  427.76   16.10
  -4   4  -2  197.48   12.80
  -4   4  -2  183.98   11.30
   4  -4   2  205.98   11.50
   4  -4   2  193.48   11.10
   4  -4   2  188.08   12.90
  -5   4  -2 1791.42   52.79
  -5   4  -2 1784.22   51.49
   5  -4   2 1736.53   52.59
   5  -4   2 1792.42   49.50
   5  -4   2 1705.03   49.70
  -6   4  -2 5020.80  121.39
  -6   4  -2 4931.21  121.79
   6  -4   2 4831.72  117.09
   6  -4   2 4821.72  139.19
  -7   4  -2  940.01   37.60
  -7   4  -2  923.71   37.40
   7  -4   2  893.51   33.80
  -8   4  -2   31.70    8.80
  -8   4  -2   20.50    7.70
   8  -4   2    7.90    3.90
  -9   4  -2  338.87   24.20
  -9   4  -2  325.07   22.80
   9  -4   2  331.57   21.30
 -10   4  -2 1340.97   54.29
  10  -4   2 1394.36   51.69
  10  -4   2 1285.87   49.70
 -11   4  -2  244.98   23.30
  11  -4   2  236.78   20.70
  11  -4   2  254.07   21.80
 -12   4  -2    6.00    8.00
  12  -4   2   11.30    7.10
  12  -4   2    3.20    7.00
 -13   4  -2   18.20   10.00
  13  -4   2    8.30    9.10
  13  -4   2    6.00    9.00
 -14   4  -2  281.97   29.90
  14  -4   2  251.77   26.20
  14  -4   2  202.48   29.70
  15  -4   2   44.90   15.50
  13   3  -2   14.50   12.10
  13   3  -2   -1.80   11.00
  12   3  -2    2.60   10.30
  12   3  -2   47.30   13.50
  12   3  -2   32.00   24.10
  11   3  -2   49.90   13.80
  11   3  -2   37.90   11.50
  11   3  -2   13.50    8.90
  10   3  -2  119.29   15.40
  10   3  -2  124.19   15.70
   9   3  -2   -4.00    5.10
   9   3  -2    3.90    5.90
   8   3  -2  138.79   14.20
   8   3  -2  151.58   13.90
  -8  -3   2   94.99   12.70
   7   3  -2  129.69   12.50
   7   3  -2  152.58   13.50
  -7  -3   2  138.89   13.60
   6   3  -2  392.56   20.40
   6   3  -2  474.55   21.80
  -6  -3   2  430.26   22.60
   5   3  -2   77.29    9.40
   5   3  -2  106.19    8.90
   5   3  -2  100.29    9.10
   5   3  -2  113.29    9.80
  -5  -3   2  104.49    9.60
   4   3  -2  135.29   11.50
   4   3  -2  129.99    9.10
   4   3  -2  135.79   10.70
   4   3  -2  161.08   10.40
  -4  -3   2  127.09    9.30
   3   3  -2  110.29    7.90
   3   3  -2  101.29    8.50
   3   3  -2  104.99    8.20
   3   3  -2  116.49    8.30
   3   3  -2  100.79    6.80
  -3  -3   2  117.29    8.10
   2   3  -2    3.20    1.50
   2   3  -2    3.00    1.50
   2   3  -2    0.90    1.60
   2   3  -2    1.30    1.90
  -2  -3   2    3.20    1.70
   1   3  -2   68.19    5.30
   1   3  -2   66.49    4.00
   1   3  -2   64.59    3.50
  -1  -3   2   67.79    4.00
  -1  -3   2   72.59    5.20
   0   3  -2    1.10    0.50
   0   3  -2   -0.20    1.50
   0   3  -2    0.40    0.80
   0  -3   2    1.10    1.20
   0  -3   2    1.00    1.10
   0  -3   2    0.10    0.40
  -1   3  -2   -1.00    0.70
  -1   3  -2   -0.40    1.60
  -1   3  -2    0.20    1.10
   1  -3   2    2.90    1.90
   1  -3   2   -0.40    0.90
   1  -3   2   -0.70    0.70
  -2   3  -2  148.09    7.10
  -2   3  -2  124.09    8.40
  -2   3  -2  136.59    7.00
   2  -3   2  138.69    7.20
   2  -3   2  138.09    8.70
   2  -3   2  148.09    7.10
  -3   3  -2  144.59    9.80
  -3   3  -2  166.88    9.40
   3  -3   2  185.58   11.10
   3  -3   2  170.28    9.20
   3  -3   2  165.48    8.90
  -4   3  -2   54.29    6.50
  -4   3  -2   55.89    7.00
   4  -3   2   53.39    6.80
   4  -3   2   62.19    5.90
   4  -3   2   46.00    5.70
  -5   3  -2    5.00    2.30
  -5   3  -2    0.80    2.80
   5  -3   2    5.50    2.50
   5  -3   2    3.30    4.00
   5  -3   2    2.00    3.00
  -6   3  -2   77.59    9.50
  -6   3  -2   81.39    8.90
   6  -3   2   83.49    8.30
  -7   3  -2    1.70    3.60
  -7   3  -2    5.30    4.30
   7  -3   2   -0.20    2.00
  -8   3  -2   30.70    9.00
   8  -3   2   24.70    5.90
  -9   3  -2    5.70    5.30
  -9   3  -2    4.50    5.90
   9  -3   2    8.30    4.80
 -10   3  -2  137.79   17.20
 -10   3  -2  126.09   15.80
  10  -3   2  111.99   13.60
  10  -3   2  137.89   15.40
 -11   3  -2   36.90   12.00
  11  -3   2   61.79   11.90
  11  -3   2   34.70    9.80
 -12   3  -2   -0.20    6.10
  12  -3   2    0.10    6.50
  12  -3   2    1.50    6.20
 -13   3  -2   15.80   10.20
  13  -3   2   11.20    9.60
  13  -3   2   -5.70    6.50
 -14   3  -2   70.49   18.60
  14  -3   2   65.79   16.00
  14  -3   2   55.69   15.00
  15  -3   2   83.19   18.50
  15  -3   2   96.79   19.10
  14   2  -2   -6.20   12.50
  14   2  -2    2.90   12.10
  13   2  -2   30.40   12.60
  13   2  -2   21.60   11.50
  13   2  -2   49.99   13.90
  12   2  -2   99.89   17.80
  12   2  -2   79.19   15.50
  12   2  -2  106.89   16.40
 -12  -2   2  106.19   19.60
  11   2  -2    9.30    7.80
  11   2  -2   17.20    9.70
 -11  -2   2    1.50    7.40
  10   2  -2   19.10    6.80
  10   2  -2   18.70    8.60
 -10  -2   2   14.00    7.30
   9   2  -2   40.80    9.20
   8   2  -2  670.83   30.70
  -8  -2   2  653.13   32.10
   7   2  -2  515.35   24.80
  -7  -2   2  473.45   25.10
   6   2  -2   50.19    7.50
   6   2  -2   64.59   10.30
  -6  -2   2   46.60    7.50
   5   2  -2    3.90    3.20
   5   2  -2    5.30    4.00
   5   2  -2    1.20    2.60
   5   2  -2   -0.20    3.50
  -5  -2   2   -1.60    2.30
   4   2  -2 4647.04  110.19
   4   2  -2 4755.92  107.99
   4   2  -2 4571.64  106.99
   4   2  -2 4751.72  115.99
  -4  -2   2 4762.32  110.69
   3   2  -2 2117.69   51.69
   3   2  -2 2068.99   53.19
   3   2  -2 2055.59   52.69
   3   2  -2 2052.29   50.19
  -3  -2   2 2085.89   53.19
  -3  -2   2 2023.00   51.09
   2   2  -2  148.89    6.60
   2   2  -2  149.79    7.00
   2   2  -2  145.39    7.80
   2   2  -2  150.38    8.40
   2   2  -2  142.99    7.60
  -2  -2   2  143.89    7.00
   1   2  -2  808.32   19.00
   1   2  -2  777.52   21.30
   1   2  -2  755.82   18.30
  -1  -2   2  794.92   21.00
  -1  -2   2  773.42   18.60
  -1  -2   2  653.03   21.90
   0   2  -2 8018.20  167.38
   0   2  -2 8255.77  171.38
   0   2  -2 8036.40  166.98
   0  -2   2 8116.99  166.88
   0  -2   2 7923.21  170.68
  -1   2  -2 2139.39   47.90
  -1   2  -2 2168.98   47.90
  -1   2  -2 2137.99   50.89
   1  -2   2 2148.58   50.69
   1  -2   2 2158.58   48.00
   1  -2   2 2205.28   47.80
  -2   2  -2  314.67   13.00
  -2   2  -2  317.37   11.90
   2  -2   2  309.27   11.60
   2  -2   2  329.57   11.30
   2  -2   2  327.57   13.20
  -3   2  -2  708.63   23.00
   3  -2   2  685.93   22.40
   3  -2   2  688.73   23.40
   3  -2   2  689.33   21.40
  -4   2  -2 1493.55   43.80
   4  -2   2 1487.75   43.80
   4  -2   2 1549.24   43.00
  -5   2  -2 1215.18   38.70
  -5   2  -2 1128.49   38.10
   5  -2   2 1121.09   37.10
   5  -2   2 1163.08   38.50
  -6   2  -2    4.30    3.70
  -6   2  -2    5.20    3.70
  -7   2  -2  182.58   15.20
  -7   2  -2  187.58   15.20
  -8   2  -2  117.69   13.90
  -8   2  -2  150.68   14.90
   8  -2   2  142.19   12.80
  -9   2  -2  285.47   22.20
  -9   2  -2  269.07   20.40
   9  -2   2  261.37   18.50
 -10   2  -2   61.09   12.20
 -10   2  -2   50.59   11.50
  10  -2   2   53.19   10.40
 -11   2  -2  155.48   18.10
  11  -2   2  160.98   16.90
  11  -2   2  153.78   17.80
 -12   2  -2   67.89   16.60
  12  -2   2   58.89   13.60
  12  -2   2   40.20   11.00
 -13   2  -2   92.79   21.10
  13  -2   2  110.39   17.70
  13  -2   2   82.99   16.70
  14  -2   2   24.90   13.40
  14  -2   2   -4.40    9.80
  15  -2   2   24.10   20.80
  15  -2   2   37.40   18.20
  14   1  -2   -7.10   10.70
  14   1  -2   20.70   13.80
  14   1  -2   -2.60   11.40
  13   1  -2   43.20   13.20
  13   1  -2   22.30   11.30
 -13  -1   2   23.80   13.90
  12   1  -2  188.68   22.90
  12   1  -2  159.38   18.30
 -12  -1   2  165.78   28.30
  11   1  -2   45.50   10.40
  11   1  -2   43.50   10.20
 -11  -1   2   66.09   14.00
  10   1  -2    3.90    7.00
  10   1  -2   20.60    7.70
 -10  -1   2    6.10    6.60
   9   1  -2    9.90    5.00
   9   1  -2    7.70    5.60
  -9  -1   2    1.80    4.50
   8   1  -2  244.18   20.70
  -8  -1   2  267.67   21.60
   7   1  -2  924.81   35.30
  -7  -1   2  952.10   37.20
   6   1  -2  270.77   15.60
  -6  -1   2  236.88   15.50
   5   1  -2   63.29    6.70
   5   1  -2   65.09    7.10
   5   1  -2   78.49    8.40
   5   1  -2   67.59    7.90
  -5  -1   2   67.19    7.80
   4   1  -2  669.03   24.60
   4   1  -2  650.53   22.70
   4   1  -2  680.13   22.90
   4   1  -2  646.54   24.20
  -4  -1   2  673.03   24.40
   3   1  -2  597.84   19.40
   3   1  -2  605.74   19.30
   3   1  -2  636.24   21.50
   3   1  -2  593.84   20.80
  -3  -1   2  587.24   20.90
   2   1  -2  206.18    8.30
   2   1  -2  195.28    7.90
   2   1  -2  183.28    9.00
   2   1  -2  191.08    9.00
  -2  -1   2  184.18    8.90
   1   1  -2   51.19    3.10
   1   1  -2   52.19    2.60
   1   1  -2   61.19    3.90
  -1  -1   2   53.29    3.60
  -1  -1   2   55.99    3.70
   0   1  -2   67.39    3.80
   0   1  -2   61.99    2.90
   0  -1   2   62.29    2.80
  -1   1  -2   12.10    2.50
  -1   1  -2    9.30    1.70
   1  -1   2   11.70    2.20
   1  -1   2    9.60    1.70
  -2   1  -2  129.89    7.20
  -2   1  -2  147.59    7.90
   2  -1   2  130.99    7.20
   2  -1   2  122.49    7.30
   2  -1   2  137.39    7.30
  -3   1  -2   29.60    4.30
  -3   1  -2   25.10    4.20
   3  -1   2   19.90    3.90
   3  -1   2   23.40    4.10
   3  -1   2   22.20    3.80
  -4   1  -2   65.99    6.90
  -4   1  -2   65.09    7.00
   4  -1   2   64.09    6.90
   4  -1   2   75.69    7.40
   4  -1   2   68.39    7.00
  -5   1  -2  103.09   10.00
  -5   1  -2  120.39   10.20
   5  -1   2   96.89    9.40
   5  -1   2   90.39    9.30
   5  -1   2   93.19    9.70
  -6   1  -2    0.20    2.30
  -6   1  -2    2.90    3.20
  -7   1  -2    5.10    3.80
  -7   1  -2    7.50    4.80
  -8   1  -2   -3.20    3.50
  -9   1  -2  220.38   19.00
  -9   1  -2  194.68   18.50
 -10   1  -2   19.40    7.30
 -10   1  -2    9.00    7.40
  10  -1   2   10.30    5.60
 -11   1  -2   12.40    8.70
  11  -1   2   15.20    7.40
  11  -1   2   13.90    6.90
 -12   1  -2   36.70   11.50
  12  -1   2   10.00   13.70
  12  -1   2   38.60   10.20
 -13   1  -2  149.69   21.50
  13  -1   2  147.09   21.50
  13  -1   2  163.28   20.10
 -14   1  -2   64.09   16.40
  14  -1   2   97.69   19.60
  14  -1   2   79.29   18.10
 -15   1  -2   -2.10   16.60
  15  -1   2  -11.70   15.30
  15   0  -2   16.30   14.20
  14   0  -2   12.90   13.40
  14   0  -2    8.20   12.00
  13   0  -2   19.10   11.10
  13   0  -2   13.30   11.60
 -13   0   2   19.70   11.50
  12   0  -2   90.39   15.70
  12   0  -2  101.89   15.10
 -12   0   2   86.89   18.10
  11   0  -2   51.59   10.90
  11   0  -2   30.10    9.10
 -11   0   2   36.60   11.50
  10   0  -2   61.99   11.20
  10   0  -2   74.99   11.30
 -10   0   2   60.59   12.20
   9   0  -2   82.79   11.50
   9   0  -2  101.99   11.40
  -9   0   2   94.19   12.80
   8   0  -2  644.14   31.40
   8   0  -2  730.13   29.60
  -8   0   2  699.73   33.40
   7   0  -2  853.41   31.10
   7   0  -2  928.41   34.30
  -7   0   2  843.32   34.70
   6   0  -2  557.14   24.30
   6   0  -2  547.35   23.40
   6   0  -2  557.94   21.90
  -6   0   2  565.94   25.20
   5   0  -2 3238.58   80.79
   5   0  -2 3214.38   82.79
   5   0  -2 3156.68   82.29
   5   0  -2 3241.68   79.99
  -5   0   2 3385.76   82.79
   4   0  -2  490.65   17.10
   4   0  -2  483.15   20.00
   4   0  -2  478.95   18.30
   4   0  -2  503.45   19.80
  -4   0   2  481.15   19.50
   3   0  -2 5298.17  119.29
   3   0  -2 5367.36  117.89
   3   0  -2 5513.85  121.49
   3   0  -2 5441.16  121.99
  -3   0   2 5524.75  121.29
   2   0  -2 1515.35   36.70
   2   0  -2 1552.34   37.90
   2   0  -2 1551.24   35.60
  -2   0   2 1500.35   36.70
  -2   0   2 1513.15   37.80
   1   0  -2 6500.55  133.09
   1   0  -2 6372.16  136.09
  -1   0   2 6265.37  132.99
  -1   0  -2 6082.89  128.69
  -1   0  -2 6060.79  129.29
   1   0   2 5947.30  128.69
   1   0   2 6089.29  129.09
   1   0   2 6166.08  130.29
  -2   0  -2 1273.17   33.10
  -2   0  -2 1279.07   32.60
  -2   0  -2 1240.78   33.20
   2   0   2 1268.67   32.50
   2   0   2 1229.78   32.80
   2   0   2 1255.97   32.60
  -3   0  -2  230.58   11.40
  -3   0  -2  227.28   12.00
  -3   0  -2  236.58   14.00
   3   0   2  207.68   11.00
   3   0   2  221.88   11.40
   3   0   2  210.38   10.80
  -4   0  -2   95.69    8.40
  -4   0  -2   90.99    8.50
  -4   0  -2  100.19    8.30
   4   0   2   90.19    8.10
   4   0   2   89.89    8.00
   4   0   2   93.09    8.50
  -5   0  -2  313.27   17.70
  -5   0  -2  319.77   16.80
   5   0   2  338.07   17.40
   5   0   2  320.07   17.50
   5   0   2  318.87   16.80
  -6   0  -2   13.60    4.70
  -6   0  -2   13.00    5.10
  -7   0  -2   41.60    9.60
  -7   0  -2   40.00    9.00
  -8   0  -2   23.00    6.50
  -8   0  -2   28.70    7.70
  -9   0  -2   -2.00    4.60
  -9   0  -2   -0.30    5.40
 -10   0  -2   33.50    9.00
 -10   0  -2   32.00    9.90
 -11   0  -2   13.80    8.30
  11   0   2   34.20   10.40
  11   0   2   38.10   10.80
 -12   0  -2   65.59   16.20
  12   0   2   48.20   12.00
  12   0   2   61.79   13.80
 -13   0  -2   28.30   13.50
  13   0   2   26.00   11.10
  13   0   2   47.90   13.90
 -14   0  -2   33.70   15.10
  14   0   2   71.79   18.20
  14   0   2   51.29   14.70
  15  -1  -2   15.80   14.00
  14  -1  -2   89.99   18.80
  14  -1  -2  119.59   20.70
 -14   1   2  108.69   23.00
  13  -1  -2  191.18   23.50
  13  -1  -2  194.58   20.60
 -13   1   2  263.37   26.60
  12  -1  -2   20.40    7.60
  12  -1  -2   34.80    9.90
 -12   1   2   -5.60    7.50
  11  -1  -2   12.40    7.50
  11  -1  -2   25.80    8.50
 -11   1   2   44.10   11.80
  10  -1  -2  190.58   17.20
  10  -1  -2  183.28   16.50
 -10   1   2  180.08   17.80
   9  -1  -2  517.05   26.20
   9  -1  -2  547.85   28.40
  -9   1   2  516.85   28.90
   8  -1  -2  570.54   25.60
   8  -1  -2  582.44   27.40
  -8   1   2  525.85   27.90
   7  -1  -2   22.30    6.10
   7  -1  -2   31.70    6.80
  -7   1   2   26.20    7.00
   6  -1  -2  424.96   19.90
   6  -1  -2  405.06   18.40
  -6   1   2  407.36   20.60
   5  -1  -2  612.34   21.70
   5  -1  -2  559.24   23.60
   5  -1  -2  565.44   24.00
   5  -1  -2  593.74   22.40
  -5   1   2  570.24   23.70
   4  -1  -2  951.10   28.40
   4  -1  -2  903.51   27.30
   4  -1  -2  940.91   34.20
   4  -1  -2  898.91   29.60
  -4   1   2  938.31   29.90
   3  -1  -2   55.69    4.70
   3  -1  -2   50.89    5.20
   3  -1  -2   52.39    4.70
   3  -1  -2   56.39    5.70
  -3   1   2   51.29    4.50
  -3   1   2   57.69    5.40
   2  -1  -2    7.90    2.10
   2  -1  -2    6.50    1.80
   2  -1  -2    8.90    2.00
  -2   1   2    9.60    2.10
  -2   1   2    5.50    1.70
  -2   1   2    9.00    2.50
   1  -1  -2  101.89    4.40
   1  -1  -2  101.49    4.80
   1  -1  -2  103.49    4.60
  -1   1   2   98.39    4.50
  -1   1   2   97.19    4.20
  -1   1   2  106.99    4.90
   0  -1  -2    8.80    1.60
   0  -1  -2    9.30    1.50
   0   1   2    7.40    1.50
   0   1   2    8.50    1.80
  -1  -1  -2    2.50    1.30
  -1  -1  -2    1.40    1.10
  -1  -1  -2   -0.10    0.80
   1   1   2    0.80    1.20
   1   1   2    2.10    1.20
   1   1   2    0.40    1.10
  -2  -1  -2   32.60    4.00
  -2  -1  -2   32.80    3.60
  -2  -1  -2   24.40    3.60
   2   1   2   36.20    3.80
   2   1   2   30.80    3.70
   2   1   2   34.50    4.20
  -3  -1  -2  198.68   10.40
  -3  -1  -2  209.88   11.70
  -3  -1  -2  199.38   11.20
   3   1   2  213.68   10.60
   3   1   2  199.98   10.70
   3   1   2  197.78   11.10
  -4  -1  -2 1146.29   35.40
  -4  -1  -2 1184.28   37.40
  -4  -1  -2 1223.08   37.40
   4   1   2 1187.48   39.10
   4   1   2 1148.89   36.20
   4   1   2 1117.69   35.30
  -5  -1  -2   14.20    4.00
  -5  -1  -2   28.30    6.30
  -5  -1  -2   20.40    5.80
   5   1   2   19.00    5.50
   5   1   2   20.10    4.90
  -6  -1  -2    1.00    2.80
  -6  -1  -2    5.60    3.40
  -6  -1  -2    2.50    3.70
  -7  -1  -2  145.99   13.60
  -7  -1  -2  130.39   13.80
  -8  -1  -2  217.78   22.40
  -8  -1  -2  188.98   18.20
  -9  -1  -2   54.39   11.40
  -9  -1  -2   49.30   11.80
 -10  -1  -2    4.90    6.00
 -10  -1  -2    6.10    7.50
  10   1   2    2.30    6.40
 -11  -1  -2    5.00    8.00
  11   1   2    5.40    7.20
  12   1   2  196.98   20.30
  12   1   2  131.69   19.50
 -13  -1  -2   42.80   15.00
  13   1   2   53.49   14.90
  13   1   2   35.00   13.30
 -14  -1  -2    5.30   13.90
  14   1   2   22.90   13.60
  15  -2  -2   52.59   16.90
 -15   2   2   47.90   23.20
  14  -2  -2   -5.20    9.70
  14  -2  -2    0.40   10.10
 -14   2   2    3.50   11.20
  13  -2  -2  136.39   20.20
  13  -2  -2  156.88   22.40
 -13   2   2  157.28   21.60
  12  -2  -2  118.19   17.00
  12  -2  -2  120.99   15.80
 -12   2   2  123.59   18.00
  11  -2  -2   23.90    8.00
  11  -2  -2   22.80    6.90
 -11   2   2   33.50   10.60
  10  -2  -2   93.39   12.00
  10  -2  -2   97.69   13.30
 -10   2   2   77.79   12.60
   9  -2  -2 1457.45   51.59
   9  -2  -2 1537.35   50.89
  -9   2   2 1480.45   54.79
   8  -2  -2  262.17   16.70
   8  -2  -2  244.58   17.00
  -8   2   2  254.67   18.30
   7  -2  -2   22.90    5.50
   7  -2  -2   15.80    4.20
  -7   2   2   19.60    5.50
   6  -2  -2   46.50    6.10
   6  -2  -2   40.20    6.20
  -6   2   2   44.90    7.00
   5  -2  -2 3071.59   74.49
   5  -2  -2 2941.41   77.39
   5  -2  -2 3015.10   74.59
   5  -2  -2 2931.31   76.89
  -5   2   2 3089.59   77.49
   4  -2  -2 1522.25   42.40
   4  -2  -2 1438.76   39.50
   4  -2  -2 1478.95   39.70
   4  -2  -2 1428.06   41.20
  -4   2   2 1418.46   41.00
  -4   2   2 1447.76   39.00
   3  -2  -2 1549.74   39.10
   3  -2  -2 1530.55   42.80
   3  -2  -2 1538.55   40.50
  -3   2   2 1503.25   39.30
  -3   2   2 1573.44   40.30
  -3   2   2 1538.45   39.00
   2  -2  -2   -0.50    0.90
   2  -2  -2    3.20    1.60
   2  -2  -2    3.30    1.60
  -2   2   2    0.20    1.10
  -2   2   2    3.00    1.40
  -2   2   2   -0.30    1.10
   1  -2  -2 2891.41   61.69
   1  -2  -2 2824.52   62.29
   1  -2  -2 2786.92   64.19
  -1   2   2 2881.01   62.39
  -1   2   2 2881.81   61.49
   0  -2  -2 6785.22  143.49
   0  -2  -2 6711.53  141.39
   0   2   2 6580.04  143.09
   0   2   2 6722.63  141.19
  -1  -2  -2   20.70    2.90
  -1  -2  -2   27.40    2.30
  -1  -2  -2   22.00    3.20
   1   2   2   27.50    3.20
   1   2   2   18.40    3.00
   1   2   2   26.70    2.40
  -2  -2  -2  158.98    7.60
  -2  -2  -2  142.59    8.30
  -2  -2  -2  164.58    9.30
   2   2   2  151.08    7.70
   2   2   2  147.79    8.40
   2   2   2  143.79    8.20
  -3  -2  -2  776.22   26.80
  -3  -2  -2  811.92   27.00
  -3  -2  -2  798.42   27.40
   3   2   2  823.82   25.50
   3   2   2  808.52   26.20
   3   2   2  813.22   26.00
  -4  -2  -2 2707.33   68.19
  -4  -2  -2 2683.63   70.79
  -4  -2  -2 2787.32   71.19
   4   2   2 2758.82   73.69
   4   2   2 2611.04   68.19
  -5  -2  -2  245.18   16.20
  -5  -2  -2  289.97   15.70
  -5  -2  -2  264.87   16.30
   5   2   2  251.27   15.80
  -6  -2  -2   -2.90    2.60
  -6  -2  -2    0.60    2.80
  -6  -2  -2   -2.90    3.20
  -7  -2  -2  493.75   25.40
  -7  -2  -2  507.45   28.00
  -8  -2  -2  935.51   42.60
  -8  -2  -2  925.61   39.80
  -9  -2  -2  537.75   29.90
  -9  -2  -2  579.74   34.00
 -10  -2  -2  114.49   16.30
 -10  -2  -2  118.79   18.90
  10   2   2  125.39   16.40
 -11  -2  -2   28.80   10.50
  11   2   2   19.70    9.40
 -12  -2  -2  255.37   26.40
  12   2   2  301.67   26.60
 -13  -2  -2  146.39   23.20
  13   2   2  151.08   23.80
  13   2   2  108.69   25.10
  14   2   2   -0.70   12.70
  14   2   2    6.00   13.60
  14   2   2  -35.10   19.80
  15  -3  -2   13.00   12.80
  15  -3  -2   14.30   14.70
 -15   3   2    4.70   19.80
  14  -3  -2   23.60   10.60
  14  -3  -2   15.60    9.90
 -14   3   2   -5.10   11.10
  13  -3  -2   -5.00    7.60
  13  -3  -2   13.50    9.70
 -13   3   2    5.70    9.60
  12  -3  -2   13.20    8.40
  12  -3  -2    1.80    5.80
 -12   3   2   15.60    7.50
  11  -3  -2   -9.50    4.70
  11  -3  -2   -2.60    4.80
 -11   3   2    0.50    5.90
  10  -3  -2   39.70   10.20
  10  -3  -2   19.20    6.30
 -10   3   2   25.90    8.40
   9  -3  -2   16.90    6.70
   9  -3  -2    6.40    5.30
  -9   3   2   12.30    5.50
   8  -3  -2    7.80    5.00
   8  -3  -2   10.00    4.20
  -8   3   2   12.30    5.60
   7  -3  -2    6.60    4.00
   7  -3  -2    2.30    2.70
  -7   3   2    5.70    4.00
   6  -3  -2   73.79    8.10
   6  -3  -2   85.29    8.70
  -6   3   2   88.09    9.30
   5  -3  -2   41.90    6.70
   5  -3  -2   36.00    5.10
   5  -3  -2   36.60    5.30
   5  -3  -2   32.30    6.50
  -5   3   2   36.60    5.50
   4  -3  -2   28.30    5.00
   4  -3  -2   30.90    4.50
   4  -3  -2   37.40    5.60
   4  -3  -2   28.70    4.30
  -4   3   2   32.90    5.10
  -4   3   2   31.20    4.40
   3  -3  -2   33.20    4.40
   3  -3  -2   31.40    4.20
   3  -3  -2   35.40    3.90
  -3   3   2   31.80    4.30
  -3   3   2   37.70    4.10
   2  -3  -2   -0.60    1.10
   2  -3  -2   -1.20    0.90
  -2   3   2    1.40    1.20
  -2   3   2    1.10    1.40
  -2   3   2   -0.90    1.20
   1  -3  -2    9.90    2.40
   1  -3  -2   13.50    2.00
   1  -3  -2   15.90    2.20
  -1   3   2   15.40    3.00
  -1   3   2   15.00    2.10
  -1   3   2   14.30    2.00
   0  -3  -2   70.99    2.80
   0  -3  -2   70.49    4.20
   0  -3  -2   68.39    5.40
   0   3   2   74.39    4.10
   0   3   2   62.09    5.00
   0   3   2   67.89    3.20
  -1  -3  -2   15.80    2.90
  -1  -3  -2   17.50    3.50
   1   3   2   17.60    3.40
   1   3   2   18.30    2.90
   1   3   2   13.00    2.00
   1   3   2   14.70    2.20
  -2  -3  -2  202.88   10.30
  -2  -3  -2  194.58    8.80
  -2  -3  -2  214.88   11.20
   2   3   2  198.88   10.60
   2   3   2  196.78    9.20
   2   3   2  199.78   10.10
  -3  -3  -2  174.58   11.30
  -3  -3  -2  156.08   10.50
   3   3   2  173.48   10.60
   3   3   2  165.08    9.80
   3   3   2  152.68   12.00
  -4  -3  -2   76.79    8.10
  -4  -3  -2   70.89    7.20
  -4  -3  -2   61.09    7.30
   4   3   2   69.09    7.80
   4   3   2   57.59    7.10
   4   3   2   70.49    8.50
  -5  -3  -2    3.10    3.80
  -5  -3  -2    5.80    4.20
  -5  -3  -2    4.60    3.50
   5   3   2    7.90    4.70
  -6  -3  -2  166.68   13.40
  -6  -3  -2  177.38   15.00
  -6  -3  -2  193.98   15.90
  -7  -3  -2   33.70    9.70
  -7  -3  -2   53.39   12.50
  -7  -3  -2   54.69    9.40
  -8  -3  -2  226.18   20.70
  -8  -3  -2  227.88   18.30
  -9  -3  -2  107.39   15.40
  -9  -3  -2   64.89   12.50
 -10  -3  -2   33.60   11.20
  10   3   2   51.29   13.40
 -11  -3  -2   26.90   10.80
  11   3   2   46.10   16.10
  12   3   2   12.40   12.00
  12   3   2   46.90   14.10
  13   3   2  148.49   22.50
  13   3   2  154.18   24.10
  13   3   2  182.78   23.90
  15  -4  -2   33.70   13.90
  14  -4  -2   98.49   19.30
  14  -4  -2   89.49   17.30
 -14   4   2  113.19   20.50
  13  -4  -2   28.40   10.20
  13  -4  -2   25.20    9.80
 -13   4   2   34.90   11.50
  12  -4  -2    8.50    8.90
  12  -4  -2    8.50    7.40
 -12   4   2   16.90    9.10
  11  -4  -2  152.28   16.50
  11  -4  -2  161.68   17.60
 -11   4   2  149.88   16.90
  10  -4  -2  390.66   24.70
  10  -4  -2  408.16   24.90
 -10   4   2  416.26   27.40
   9  -4  -2   -1.30    3.20
   9  -4  -2    0.90    4.40
  -9   4   2    0.70    5.00
   8  -4  -2    0.00    2.70
   8  -4  -2   -0.20    3.40
  -8   4   2    5.10    3.70
   7  -4  -2  172.18   13.10
   7  -4  -2  203.58   14.00
  -7   4   2  190.28   15.10
   6  -4  -2 1662.73   57.09
   6  -4  -2 1750.72   49.70
   6  -4  -2 1692.73   50.29
  -6   4   2 1775.92   52.79
   5  -4  -2 1150.58   34.30
   5  -4  -2 1177.98   36.20
   5  -4  -2 1130.49   37.20
   5  -4  -2 1112.99   36.90
  -5   4   2 1084.59   36.30
  -5   4   2 1015.40   46.30
   4  -4  -2    2.30    2.70
   4  -4  -2    0.40    2.70
   4  -4  -2    0.50    2.20
   4  -4  -2   -0.20    1.60
  -4   4   2    2.30    2.40
  -4   4   2    4.10    2.30
   3  -4  -2  367.76   15.90
   3  -4  -2  398.26   14.20
   3  -4  -2  394.26   15.80
  -3   4   2  377.06   15.90
  -3   4   2  403.46   15.60
  -3   4   2  389.86   14.10
   2  -4  -2 1364.56   38.30
   2  -4  -2 1453.65   36.30
   2  -4  -2 1404.56   34.60
  -2   4   2 1420.26   35.90
  -2   4   2 1466.15   34.80
   1  -4  -2 2567.44   63.19
   1  -4  -2 2688.83   58.89
   1  -4  -2 2605.54   58.59
  -1   4   2 2690.63   58.49
  -1   4   2 2659.63   58.79
  -1   4   2 2587.24   63.29
   0  -4  -2   85.49    4.30
   0  -4  -2   80.99    6.40
   0  -4  -2   68.09    4.50
   0   4   2   76.49    4.20
   0   4   2   74.09    4.40
   0   4   2   72.89    6.20
  -1  -4  -2    9.00    2.90
  -1  -4  -2   13.90    3.10
   1   4   2   10.00    2.20
   1   4   2    6.50    1.90
   1   4   2   14.40    2.80
   1   4   2   12.20    2.50
  -2  -4  -2  370.06   15.40
  -2  -4  -2  377.36   16.60
   2   4   2  377.46   14.10
   2   4   2  375.46   13.40
   2   4   2  387.36   15.00
  -3  -4  -2 1478.35   42.90
  -3  -4  -2 1506.25   44.10
   3   4   2 1425.86   41.20
   3   4   2 1470.05   40.60
   3   4   2 1516.85   39.40
   3   4   2 1466.05   42.80
  -4  -4  -2    1.90    3.20
  -4  -4  -2    1.50    2.70
   4   4   2    3.90    3.70
   4   4   2    4.60    2.80
   4   4   2    6.80    3.80
  -5  -4  -2  368.76   18.60
  -5  -4  -2  337.87   20.00
  -5  -4  -2  376.56   20.80
   5   4   2  341.47   18.90
   5   4   2  369.36   17.30
  -6  -4  -2  727.43   33.40
  -6  -4  -2  750.52   33.30
  -6  -4  -2  750.82   30.60
  -7  -4  -2 1168.18   46.40
  -7  -4  -2 1091.39   41.70
  -8  -4  -2   31.90    9.60
  -8  -4  -2   44.20    9.60
  -8  -4  -2   42.70    9.90
   8   4   2   50.79   10.20
   9   4   2   13.60    6.70
   9   4   2   19.20    8.70
  10   4   2  198.68   19.50
  10   4   2  227.48   21.60
  11   4   2   67.09   15.80
  11   4   2   57.49   12.70
  12   4   2    3.30   11.60
  12   4   2  -18.20   10.10
  13   4   2   -1.70   14.10
  13   4   2   17.00   13.60
  13   4   2   16.80   15.50
  15  -5  -2   78.19   24.20
  15  -5  -2   69.79   17.20
 -15   5   2   52.09   16.10
  14  -5  -2  134.59   20.10
  14  -5  -2  120.79   20.40
 -14   5   2  111.19   20.70
  13  -5  -2  145.09   19.10
  13  -5  -2  145.59   18.70
 -13   5   2  162.18   22.50
  12  -5  -2   14.30    8.30
  12  -5  -2    3.20    6.40
 -12   5   2   15.50   10.50
  11  -5  -2    2.20    5.90
  11  -5  -2    3.90    5.60
 -11   5   2   11.50    6.70
  10  -5  -2   38.10    9.40
  10  -5  -2   56.89   10.30
 -10   5   2   48.50   12.10
   9  -5  -2  408.86   23.70
   9  -5  -2  403.46   23.30
  -9   5   2  406.76   25.40
   8  -5  -2   40.60    8.10
  -8   5   2   50.79    9.00
   7  -5  -2  195.68   13.70
   7  -5  -2  194.68   14.30
  -7   5   2  184.98   14.80
   6  -5  -2  101.89    9.70
   6  -5  -2   86.99    8.70
  -6   5   2  104.79   10.30
   5  -5  -2   23.40    5.40
   5  -5  -2    9.80    3.60
   5  -5  -2   26.70    6.20
   5  -5  -2   18.10    5.10
  -5   5   2   20.30    5.30
   4  -5  -2   39.30    6.40
   4  -5  -2   38.40    5.60
   4  -5  -2   46.20    6.10
   4  -5  -2   43.90    4.90
  -4   5   2   48.80    6.60
  -4   5   2   42.50    5.90
   3  -5  -2  137.09    9.70
   3  -5  -2  136.29    9.20
   3  -5  -2  125.69    7.30
  -3   5   2  139.39    7.70
  -3   5   2  146.99   10.00
  -3   5   2  136.19    8.90
   2  -5  -2  264.17   13.20
   2  -5  -2  252.77    9.70
   2  -5  -2  250.27   11.00
  -2   5   2  254.87   10.90
  -2   5   2  260.37    9.80
   1  -5  -2    5.40    2.00
   1  -5  -2   10.30    2.90
   1  -5  -2   11.70    2.40
  -1   5   2    8.20    1.80
  -1   5   2    6.40    3.10
  -1   5   2    9.70    2.00
   0  -5  -2    0.90    1.40
   0  -5  -2    2.80    1.50
   0  -5  -2    4.90    2.30
   0   5   2    1.80    1.40
   0   5   2    0.90    1.60
  -1  -5  -2   22.00    3.60
  -1  -5  -2   17.50    4.50
   1   5   2   32.30    5.10
   1   5   2   21.70    3.40
   1   5   2   23.90    3.30
   1   5   2   19.60    3.20
  -2  -5  -2    0.00    2.40
   2   5   2    1.30    2.40
   2   5   2    1.40    1.90
   2   5   2    3.40    2.70
  -3  -5  -2  156.48   10.90
  -3  -5  -2  138.19   11.20
   3   5   2  164.68   10.50
   3   5   2  151.18    9.80
   3   5   2  157.98    9.60
  -4  -5  -2   48.30    7.30
  -4  -5  -2   47.00    7.50
   4   5   2   46.20    8.60
   4   5   2   49.00    6.70
   4   5   2   38.90    7.70
  -5  -5  -2  138.89   13.50
  -5  -5  -2  129.09   12.70
   5   5   2  150.48   11.50
   5   5   2  157.48   14.50
  -6  -5  -2   52.29   12.30
  -6  -5  -2   38.70    9.10
   6   5   2   32.30    7.60
  -7  -5  -2   70.89   12.80
  -7  -5  -2   69.09   12.30
   7   5   2   77.49   11.20
  -8  -5  -2   35.90   10.50
  -8  -5  -2   48.00    9.80
   8   5   2   34.70    9.90
   8   5   2   41.60   10.30
   9   5   2   42.10   10.70
   9   5   2   31.90    9.50
  10   5   2   81.09   15.60
  10   5   2   94.99   16.90
  11   5   2   82.19   16.60
  11   5   2   63.19   16.00
  12   5   2  105.19   19.10
  12   5   2  137.89   23.20
 -16   6   2   34.60   17.30
  15  -6  -2   16.20   12.70
 -15   6   2   25.60   12.90
  14  -6  -2  173.88   23.20
  14  -6  -2  149.49   21.90
 -14   6   2  143.49   21.30
  13  -6  -2   41.00   11.20
  13  -6  -2   56.59   13.30
 -13   6   2   50.29   14.40
  12  -6  -2   79.19   14.90
  12  -6  -2   99.79   17.50
 -12   6   2   88.19   16.10
  11  -6  -2   22.50    7.90
  11  -6  -2   21.60    8.20
 -11   6   2   16.80    8.50
  10  -6  -2  232.38   18.70
  10  -6  -2  188.28   17.60
 -10   6   2  233.18   20.80
   9  -6  -2   89.29   10.90
   9  -6  -2  125.79   12.90
  -9   6   2  108.09   12.70
   8  -6  -2  404.06   21.40
   8  -6  -2  389.56   22.60
  -8   6   2  389.16   23.40
   7  -6  -2  679.73   29.60
   7  -6  -2  707.43   27.80
  -7   6   2  665.03   30.40
   6  -6  -2   12.10    3.30
   6  -6  -2   12.10    5.00
   6  -6  -2    6.10    3.20
  -6   6   2    8.90    4.30
   5  -6  -2 1238.08   39.40
   5  -6  -2 1104.79   37.20
   5  -6  -2 1133.49   34.30
   5  -6  -2 1111.29   38.60
  -5   6   2 1178.78   38.30
   4  -6  -2 1544.15   44.20
   4  -6  -2 1621.74   42.10
   4  -6  -2 1522.25   45.60
   4  -6  -2 1651.63   47.40
  -4   6   2 1611.44   45.50
   3  -6  -2 3213.18   74.89
   3  -6  -2 3325.77   79.39
   3  -6  -2 3380.96   82.59
  -3   6   2 3305.87   75.29
  -3   6   2 3285.57   79.19
   2  -6  -2   88.89    5.40
   2  -6  -2   77.59    7.50
   2  -6  -2   80.89    6.60
  -2   6   2   81.19    6.30
  -2   6   2   76.59    5.10
   1  -6  -2 3049.59   67.19
   1  -6  -2 2926.81   67.59
   1  -6  -2 3125.39   75.69
  -1   6   2 3012.70   66.39
  -1   6   2 3112.29   69.49
  -1   6   2 2881.01   74.59
   0  -6  -2 1324.27   32.70
   0  -6  -2 1381.36   34.00
   0  -6  -2 1399.36   40.80
   0   6   2 1392.96   34.90
   0   6   2 1345.67   32.80
  -1  -6  -2  851.71   24.50
  -1  -6  -2  785.62   28.70
   1   6   2  819.12   23.30
   1   6   2  815.12   23.90
   1   6   2  804.72   22.90
  -2  -6  -2   35.20    5.80
  -2  -6  -2   33.40    5.60
   2   6   2   38.80    5.00
   2   6   2   41.30    6.20
   2   6   2   40.80    5.30
  -3  -6  -2  679.23   25.30
  -3  -6  -2  670.83   27.90
   3   6   2  711.33   24.40
   3   6   2  652.83   23.40
   3   6   2  687.63   24.20
  -4  -6  -2  261.47   17.70
  -4  -6  -2  241.98   16.00
   4   6   2  261.87   15.80
   4   6   2  255.57   14.30
  -5  -6  -2   31.80    6.60
  -5  -6  -2   41.60    9.00
   5   6   2   30.20    7.10
  -6  -6  -2   46.30   10.50
  -6  -6  -2   35.90    8.40
   6   6   2   36.30    8.10
  -7  -6  -2   16.80    7.40
  -7  -6  -2    8.30    7.00
  -8  -6  -2   -5.10    7.60
   8   6   2   -7.60    6.10
   8   6   2    1.50    6.00
   9   6   2   12.90    8.90
   9   6   2    5.30    8.60
  10   6   2    1.20   11.30
  10   6   2    2.80    9.90
  11   6   2   -5.20   10.90
  11   6   2    4.30   12.90
  15  -7  -2   59.79   15.00
 -15   7   2   17.50   13.70
  14  -7  -2   -4.90   10.10
  14  -7  -2    9.50   10.60
 -14   7   2   29.00   12.70
  13  -7  -2    8.50    7.80
  13  -7  -2  -12.50    8.90
 -13   7   2   13.50   11.20
  12  -7  -2   27.90    8.80
  12  -7  -2   25.60    9.90
 -12   7   2   30.30   11.00
  11  -7  -2   66.99   12.70
  11  -7  -2   89.69   13.20
 -11   7   2   68.69   13.70
  10  -7  -2  167.18   15.60
  10  -7  -2  188.58   18.00
 -10   7   2  182.68   18.50
   9  -7  -2   -0.10    4.40
   9  -7  -2   12.80    5.60
  -9   7   2   -5.50    5.20
   8  -7  -2  300.57   20.00
   8  -7  -2  299.27   18.10
  -8   7   2  294.57   21.20
   7  -7  -2  158.08   14.30
   7  -7  -2  168.98   12.70
  -7   7   2  179.78   15.20
   6  -7  -2  273.77   15.00
   6  -7  -2  313.77   18.00
   6  -7  -2  286.77   18.00
  -6   7   2  302.87   18.20
   5  -7  -2   38.00    6.50
   5  -7  -2   38.30    5.40
   5  -7  -2   48.70    8.50
   5  -7  -2   36.10    7.80
  -5   7   2   46.70    7.20
   4  -7  -2  574.74   19.50
   4  -7  -2  565.24   23.20
   4  -7  -2  557.14   21.40
   4  -7  -2  585.34   24.80
  -4   7   2  554.84   22.70
   3  -7  -2  516.75   22.10
   3  -7  -2  498.85   16.30
   3  -7  -2  508.15   19.80
   3  -7  -2  450.35   17.40
  -3   7   2  508.15   19.60
   2  -7  -2  381.56   12.40
   2  -7  -2  388.46   18.40
   2  -7  -2  355.06   14.40
  -2   7   2  369.06   12.00
  -2   7   2  341.77   14.70
   1  -7  -2   41.40    3.70
   1  -7  -2   44.10    4.10
   1  -7  -2   54.19    7.00
  -1   7   2   44.20    5.00
  -1   7   2   38.70    3.40
   0  -7  -2    4.10    1.90
   0  -7  -2    2.40    2.30
   0   7   2    5.10    2.50
   0   7   2    3.20    2.20
   0   7   2    1.90    1.70
  -1  -7  -2    0.60    2.10
  -1  -7  -2   -0.40    2.80
   1   7   2    0.40    2.50
   1   7   2   -0.20    2.60
   1   7   2   -1.30    2.00
  -2  -7  -2  189.48   13.20
  -2  -7  -2  158.38   13.00
   2   7   2  183.68   10.50
   2   7   2  199.38   10.00
   2   7   2  191.08   10.90
  -3  -7  -2   38.90    7.60
  -3  -7  -2   48.40    7.20
   3   7   2   36.60    7.10
   3   7   2   56.19    7.10
  -4  -7  -2   57.29   10.30
  -4  -7  -2   70.79    9.50
   4   7   2   88.19    9.50
   4   7   2   82.99   10.50
   4   7   2   63.09    9.60
  -5  -7  -2  301.07   19.30
  -5  -7  -2  298.47   20.50
   5   7   2  274.77   17.10
  -6  -7  -2  259.07   21.00
   6   7   2  282.47   18.10
   6   7   2  266.37   18.40
  -7  -7  -2    6.90    8.10
   7   7   2   21.90    7.80
   7   7   2   18.70    8.10
  -8  -7  -2   41.30   12.40
   8   7   2   24.50   10.00
   8   7   2   16.50    9.10
   9   7   2   26.50   11.90
   9   7   2   22.40   10.30
  10   7   2   88.49   23.50
  10   7   2  114.19   19.60
  11   7   2   -0.20   14.50
  15  -8  -2   85.59   19.10
  15  -8  -2   76.29   17.30
 -15   8   2   64.99   19.90
  14  -8  -2   62.69   15.60
  14  -8  -2   53.79   14.80
 -14   8   2   44.80   15.60
  13  -8  -2   86.29   16.80
  13  -8  -2  124.89   19.60
 -13   8   2  101.79   19.70
  12  -8  -2   -0.20   11.00
  12  -8  -2    8.80    8.70
 -12   8   2   -5.20    7.80
  11  -8  -2  494.65   29.20
  11  -8  -2  433.56   28.70
 -11   8   2  397.66   28.90
  10  -8  -2  324.87   21.50
  10  -8  -2  323.77   24.10
 -10   8   2  308.57   23.60
   9  -8  -2   21.00    6.90
   9  -8  -2   34.40    9.20
  -9   8   2   31.80    9.90
   8  -8  -2    5.40    5.00
   8  -8  -2   12.50    5.70
  -8   8   2   12.80   10.50
   7  -8  -2 1003.10   34.80
   7  -8  -2 1047.20   40.30
  -7   8   2  980.20   39.40
   6  -8  -2  825.52   32.20
   6  -8  -2  910.41   30.20
   6  -8  -2  928.41   41.60
  -6   8   2  870.41   34.40
   5  -8  -2   66.59   10.00
   5  -8  -2   65.59    6.90
   5  -8  -2   81.19    9.90
  -5   8   2   53.89    8.00
   4  -8  -2   31.60    6.40
   4  -8  -2   37.70    4.90
   4  -8  -2   26.10    6.00
  -4   8   2   31.50    6.90
   3  -8  -2 1144.19   30.90
   3  -8  -2 1110.19   29.20
   3  -8  -2 1076.29   33.50
   3  -8  -2 1072.79   37.80
  -3   8   2 1124.59   34.30
   2  -8  -2 1171.98   28.80
   2  -8  -2 1158.28   28.20
   2  -8  -2 1147.49   38.60
   2  -8  -2 1085.29   31.40
   1  -8  -2   69.89    5.60
   1  -8  -2   71.89    3.90
   1  -8  -2   73.89    8.70
  -1   8   2   79.09    6.60
  -1   8   2   78.79    4.20
   0  -8  -2    8.90    4.20
   0  -8  -2    1.00    1.80
   0   8   2    8.90    3.40
   0   8   2    6.00    3.00
  -1  -8  -2  721.83   29.60
  -1  -8  -2  719.43   21.20
   1   8   2  705.83   19.70
   1   8   2  709.23   23.30
   1   8   2  716.53   22.40
  -2  -8  -2  466.55   23.70
  -2  -8  -2  477.25   19.60
   2   8   2  486.85   19.00
   2   8   2  505.45   17.20
   2   8   2  462.05   18.30
  -3  -8  -2   66.49    8.00
   3   8   2   65.99    8.30
  -4  -8  -2   -7.30    4.90
   4   8   2   -1.20    4.80
   4   8   2    8.00    6.50
   4   8   2   13.10    8.20
  -5  -8  -2   99.09   13.70
   5   8   2   78.89   11.30
   5   8   2  110.39   11.20
  -6  -8  -2   52.59   11.00
   6   8   2   45.70    9.60
   6   8   2   60.09   12.30
  -7  -8  -2   59.59   14.30
   7   8   2   62.09   13.30
   7   8   2   54.59   10.70
  -8  -8  -2   28.50   11.40
   8   8   2   51.09   11.70
   8   8   2   18.40   10.50
   9   8   2    3.70   11.90
   9   8   2  -11.40   10.10
  10   8   2   21.20   18.90
  10   8   2   27.60   13.40
  15  -9  -2   18.40   13.40
  15  -9  -2    7.90   13.30
  14  -9  -2   24.50   15.40
  14  -9  -2   23.10   13.60
 -14   9   2   19.80   14.40
  13  -9  -2   50.49   14.40
  13  -9  -2   36.20   12.10
 -13   9   2   28.70   12.00
  12  -9  -2   39.60   12.30
  12  -9  -2   48.00   13.20
 -12   9   2   34.10   11.20
  11  -9  -2    6.30    7.60
  11  -9  -2    1.20    7.30
 -11   9   2   21.00   10.70
  10  -9  -2   12.50    7.20
  10  -9  -2    3.30    6.80
 -10   9   2    7.60    8.60
   9  -9  -2   14.90    7.10
   9  -9  -2   17.70    6.80
  -9   9   2   23.90    7.50
   8  -9  -2  103.79   12.20
   8  -9  -2   96.99   11.30
  -8   9   2  133.89   15.00
   7  -9  -2    4.00    4.10
   7  -9  -2   -0.50    4.50
  -7   9   2   21.70    8.00
   6  -9  -2   23.40    5.30
   6  -9  -2   22.20    7.60
   6  -9  -2   29.90    8.60
  -6   9   2   40.40    8.40
   5  -9  -2   14.40    4.10
   5  -9  -2   19.20    6.90
   5  -9  -2    5.30    5.20
   5  -9  -2   28.20    8.50
  -5   9   2   14.40    5.80
   4  -9  -2  165.48   10.80
   4  -9  -2  149.29   15.30
   4  -9  -2  144.19   12.70
   4  -9  -2  179.88   13.80
  -4   9   2  171.98   12.40
   3  -9  -2   10.00    4.70
   3  -9  -2   16.90    3.10
   3  -9  -2   10.40    4.90
   3  -9  -2   15.70    3.60
  -3   9   2   18.60    5.10
   2  -9  -2   17.90    4.80
   2  -9  -2   20.10    6.50
  -2   9   2   11.40    4.10
   1  -9  -2    1.10    3.80
   1  -9  -2   -4.40    2.70
  -1   9   2    2.00    3.10
   0  -9  -2   56.79    9.20
   0   9   2   40.00    5.80
   0   9   2   55.09    6.30
  -1  -9  -2   29.20    8.70
   1   9   2   40.00    7.30
   1   9   2   20.70    2.80
  -2  -9  -2   82.59   11.80
   2   9   2   76.99    6.10
   2   9   2   79.39    8.40
   2   9   2   70.09    7.70
  -3  -9  -2   89.99   12.60
   3   9   2   47.00    6.50
   3   9   2   42.20    8.20
   3   9   2   61.19    8.40
  -4  -9  -2  112.09   14.10
   4   9   2  115.29   14.70
   4   9   2   91.19   11.30
   4   9   2   88.09   11.30
  -5  -9  -2   46.50   11.70
   5   9   2   33.60    7.40
   5   9   2   36.60    9.00
  -6  -9  -2  127.99   19.00
   6   9   2  108.09   12.90
   6   9   2  109.69   15.20
  -7  -9  -2   35.00   13.40
   7   9   2   16.30   10.90
   7   9   2   36.10   10.30
  -8  -9  -2   48.00   17.20
   8   9   2   58.49   12.50
   8   9   2   62.49   14.90
  15 -10  -2  -31.20   12.70
 -15  10   2   16.90   14.80
 -14  10   2  -15.40   12.50
  13 -10  -2   37.60   15.10
  13 -10  -2   66.69   21.60
 -13  10   2   73.29   16.80
  12 -10  -2  210.18   21.40
  12 -10  -2  215.58   23.60
  11 -10  -2   16.70    8.90
  11 -10  -2    0.50    6.80
 -11  10   2   10.10    9.60
  10 -10  -2    9.20    7.10
  10 -10  -2   10.60    7.10
 -10  10   2   11.80    7.80
   9 -10  -2   39.50   10.70
   9 -10  -2   84.99   11.80
  -9  10   2   70.49   13.50
   8 -10  -2  355.96   23.80
   8 -10  -2  328.17   18.90
  -8  10   2  315.17   22.20
   7 -10  -2   63.29    8.50
   7 -10  -2   77.09   12.00
  -7  10   2   64.69   11.40
   6 -10  -2   33.00    6.60
   6 -10  -2   58.59   11.70
   6 -10  -2   44.80    9.60
  -6  10   2   40.90    9.10
   5 -10  -2   63.59    6.80
   5 -10  -2   60.19    9.70
   5 -10  -2   54.59   10.20
  -5  10   2   68.39    9.50
   4 -10  -2  544.65   24.10
   4 -10  -2  627.64   29.20
   4 -10  -2  593.54   19.30
   4 -10  -2  624.64   18.60
  -4  10   2  604.34   24.60
   3 -10  -2  247.58   17.70
   3 -10  -2  224.88   13.10
  -3  10   2  241.78   13.60
   2 -10  -2   24.00    7.50
   2 -10  -2   14.40    4.70
  -2  10   2   15.70    5.00
   1 -10  -2    0.60    4.10
  -1  10   2   -1.50    4.90
   0 -10  -2  105.59   12.50
   0  10   2   92.29    7.70
  -1 -10  -2  114.49   13.20
   1  10   2  120.89    9.10
  -2 -10  -2   82.59   12.40
  -3 -10  -2   -6.60    6.70
   3  10   2    6.90    3.80
  -4 -10  -2   31.40   10.20
   4  10   2   53.49   10.20
  -5 -10  -2  122.29   18.50
   5  10   2  109.39   13.90
   5  10   2  137.19   12.40
  -6 -10  -2   49.00   14.20
   6  10   2    7.40    8.40
   6  10   2   43.60   12.20
  -7 -10  -2   31.00   15.80
  -8 -10  -2  137.49   24.50
  14 -11  -2  -14.10   12.50
  13 -11  -2  -10.40    9.90
  13 -11  -2    0.60   10.70
 -13  11   2   -1.10   13.00
  12 -11  -2   31.90   12.60
  12 -11  -2   16.70   10.00
 -12  11   2   23.40   13.20
  11 -11  -2   44.50   11.80
  11 -11  -2   82.99   15.20
 -11  11   2  103.59   19.30
  10 -11  -2   13.00   10.90
  10 -11  -2   12.00    8.20
 -10  11   2   37.90   12.40
   9 -11  -2   61.09   10.60
   9 -11  -2   45.50   11.60
  -9  11   2   36.60   11.00
   8 -11  -2    2.40    6.60
   8 -11  -2    3.00    4.80
  -8  11   2   -4.00    6.70
   7 -11  -2    0.80    4.30
   7 -11  -2  -10.80    5.10
  -7  11   2    0.50    6.50
   6 -11  -2   19.80    4.80
   6 -11  -2   -1.50    7.50
   6 -11  -2   19.20    7.30
  -6  11   2    9.10    7.30
   5 -11  -2   83.89   12.30
   5 -11  -2   75.19    8.80
   5 -11  -2   64.89    7.20
  -5  11   2   68.29    9.90
   4 -11  -2   17.00    6.30
   4 -11  -2   19.40    7.50
  -4  11   2   23.00    6.30
   3 -11  -2   33.60    7.10
   3 -11  -2   38.50    9.10
  -3  11   2   40.60    7.30
   2 -11  -2   59.09   10.60
   2 -11  -2   37.60    6.30
  -2  11   2   54.89    7.00
   1 -11  -2   64.09   12.10
  -1  11   2   68.19    8.60
  -1  11   2   61.59    7.70
   0 -11  -2   12.70    7.20
   0  11   2   13.10    4.70
   0  11   2   13.10    4.20
  -1 -11  -2  133.89   14.60
   1  11   2  116.69    9.00
   1  11   2   97.09    7.80
  -2 -11  -2   33.80    9.90
   2  11   2   32.80    9.70
  -3 -11  -2   10.50    9.60
   3  11   2    7.00    6.50
  -4 -11  -2   20.60   11.00
  -5 -11  -2  133.29   21.50
  -6 -11  -2   41.10   14.90
  -7 -11  -2   33.80   19.50
  14 -12  -2   40.10   14.40
 -14  12   2   49.99   19.50
 -13  12   2   11.50   14.30
  12 -12  -2   99.49   17.70
  12 -12  -2  121.19   20.70
 -12  12   2  108.49   21.80
  11 -12  -2   76.09   15.30
  11 -12  -2   74.89   17.30
 -11  12   2   64.99   16.00
  10 -12  -2   87.79   17.10
  10 -12  -2   83.39   15.90
 -10  12   2   89.39   16.80
   9 -12  -2   30.00    8.90
  -9  12   2   13.30    9.10
   8 -12  -2    4.90    6.30
   8 -12  -2   14.00    9.20
  -8  12   2    5.10    8.30
   7 -12  -2  105.29   11.00
   7 -12  -2  125.29   16.00
  -7  12   2  107.69   16.80
   6 -12  -2  259.97   13.00
   6 -12  -2  235.58   15.60
   6 -12  -2  268.07   21.70
  -6  12   2  296.27   19.80
   5 -12  -2  253.47   20.90
  -5  12   2  244.08   16.80
   4 -12  -2   57.69   10.80
   4 -12  -2   62.19   11.60
   3 -12  -2  204.28   17.80
   3 -12  -2  159.08   12.30
   2 -12  -2  349.57   23.30
   1 -12  -2  220.58   18.90
  -1  12   2  192.78    8.80
  -1  12   2  204.28   13.80
   0 -12  -2   58.39   11.40
  -1 -12  -2   19.20    9.20
  -2 -12  -2   83.89   17.00
  -3 -12  -2   26.50   12.10
  -4 -12  -2   10.10   13.20
  -5 -12  -2    5.20   14.30
  13 -13  -2    8.60   14.00
 -13  13   2   23.30   16.20
  12 -13  -2   38.70   14.20
 -12  13   2   14.50   14.80
  11 -13  -2   -4.80   10.30
  10 -13  -2   16.70    9.30
 -10  13   2   21.70   11.70
   9 -13  -2   -6.40    8.40
  -9  13   2   15.20   10.70
   8 -13  -2   98.69   17.80
  -8  13   2   92.29   15.30
   7 -13  -2   16.00    9.60
   7 -13  -2    8.00    5.60
  -7  13   2   17.00    9.30
   6 -13  -2  -15.60    6.70
  -6  13   2    5.70    7.40
   5 -13  -2   10.70    7.20
  -5  13   2   16.50    7.70
   4 -13  -2   86.69   14.30
   3 -13  -2   11.40    7.10
  -3  13   2    4.50    5.90
   2 -13  -2    3.00    7.30
   1 -13  -2   21.00    8.90
   0 -13  -2    7.30    8.40
  -1 -13  -2   13.70   11.20
  -2 -13  -2   30.40   12.30
  -3 -13  -2   41.70   15.10
  -4 -13  -2   38.30   17.50
  12 -14  -2   10.70   16.60
  11 -14  -2   27.40   14.20
  11 -14  -2   30.20   14.30
 -11  14   2   22.50   14.80
  10 -14  -2    5.00   11.30
  10 -14  -2  -14.40   11.80
   9 -14  -2   91.29   18.20
  -9  14   2   54.09   14.30
   8 -14  -2  103.59   19.30
  -8  14   2   95.29   18.20
   7 -14  -2   73.89   15.00
  -7  14   2   64.39   13.20
   6 -14  -2  -12.20    7.50
  -6  14   2    1.50    8.30
  -5  14   2  113.19   13.30
   4 -14  -2  426.86   29.30
   3 -14  -2  266.47   24.20
   2 -14  -2   21.90   10.80
   1 -14  -2   51.79   14.70
   0 -14  -2  201.78   25.50
  -1 -14  -2   80.89   16.60
  -2 -14  -2   20.80   15.10
  10 -15  -2   -0.60   11.40
 -10  15   2   -0.30   14.20
   9 -15  -2   -4.90   11.90
  -9  15   2  -18.60   13.00
  -8  15   2    7.90   15.30
   6 -15  -2   17.30   11.30
   5 -15  -2   -8.10   10.40
   4 -15  -2  -11.70   10.20
   3 -15  -2    8.00   11.30
   1 -15  -2   15.00   12.60
   0 -15  -2   18.90   15.90
   8 -16  -2   15.20   14.20
   7 -16  -2    5.60   13.90
   6 -16  -2  118.39   23.50
   5 -16  -2   14.60   13.60
   4 -16  -2    0.30   12.80
   3 -16  -2   38.20   15.60
   1 -16   3   86.89   23.60
   2 -16   3   36.90   18.90
   4 -16   3   59.29   15.60
   5 -16   3   32.60   13.40
  -6  16  -3   16.20   17.10
   6 -16   3   11.70   11.80
  -7  16  -3    6.30   15.20
   8 -16   3   10.40   11.50
  -9  16  -3   10.80   16.80
   9 -16   3   -1.70   13.70
  -1 -15   3   14.00   20.20
   0 -15   3   38.30   15.00
   2 -15   3    4.50   10.10
  -3  15  -3   15.80   12.10
  -4  15  -3   32.80   12.60
  -5  15  -3   25.90   12.40
   5 -15   3   28.90   12.30
  -6  15  -3   44.70   14.30
   6 -15   3   29.50   15.10
  -7  15  -3   27.30   13.90
   7 -15   3  -12.10   10.70
   8 -15   3   -8.80   10.10
  -9  15  -3   54.99   16.40
   9 -15   3   54.69   14.70
 -10  15  -3  185.48   26.80
  10 -15   3  168.48   24.30
 -11  15  -3    9.50   15.70
  11 -15   3   31.70   14.00
  -2 -14   3   39.80   14.50
  -1 -14   3   68.89   22.80
   0  14  -3   16.30   11.80
  -1  14  -3   20.90   10.60
   1 -14   3   -4.30    7.90
   2 -14   3  109.59   15.20
  -3  14  -3  110.89   16.40
   3 -14   3   92.89   14.90
  -4  14  -3   42.20   11.30
   4 -14   3   43.60   11.60
  -5  14  -3   -7.00    9.80
   5 -14   3    4.40    8.40
  -6  14  -3   85.59   16.90
   6 -14   3   74.79   14.30
  -7  14  -3   51.59   13.80
   7 -14   3   48.40   12.80
  -8  14  -3   -8.70   11.10
   8 -14   3   -5.00    9.40
  -9  14  -3   -4.30   11.60
   9 -14   3   -5.90    9.40
 -10  14  -3   39.70   16.70
  10 -14   3   53.19   12.80
 -11  14  -3   -9.00   13.70
  11 -14   3   -9.80   12.10
  11 -14   3   -7.30    9.70
 -12  14  -3   13.10   16.60
  12 -14   3  -17.40   13.60
  12 -14   3   -3.00   14.60
  -4 -13   3   23.80   15.40
   3  13  -3   18.20   14.00
  -3 -13   3   22.30   12.60
   1  13  -3  127.09   16.40
  -1 -13   3  110.99   16.70
   0  13  -3   95.99   15.60
   0 -13   3  116.89   14.20
  -1  13  -3   38.10   10.90
   1 -13   3   30.20    8.80
  -2  13  -3   15.10    8.60
   2 -13   3    7.80    8.10
  -3  13  -3  139.79   15.20
   3 -13   3  175.98   17.00
  -4  13  -3   56.09   12.30
   4 -13   3   49.99   10.70
  -5  13  -3   50.19   12.20
   5 -13   3   62.89   12.10
  -6  13  -3    8.50    8.80
   6 -13   3    1.90    6.20
  -7  13  -3   68.39   15.70
   7 -13   3   93.89    7.50
   7 -13   3   84.49   15.00
  -8  13  -3  197.88   21.10
   8 -13   3  180.58   19.70
  -9  13  -3  155.38   21.30
 -10  13  -3    6.30   18.30
  10 -13   3    5.80    9.50
 -11  13  -3  125.49   22.40
  11 -13   3  188.28   23.60
  11 -13   3  120.39   18.00
 -12  13  -3  215.68   28.70
  12 -13   3  241.58   24.50
  12 -13   3  276.27   27.80
 -13  13  -3   87.29   20.80
  13 -13   3   59.99   17.70
  13 -13   3  144.89   24.90
  -6 -12   3    1.60   20.70
   5  12  -3   25.50   14.30
  -5 -12   3   -8.80   13.20
   4  12  -3   89.69   17.90
   3  12  -3   45.30   12.90
  -3 -12   3   50.39   10.90
   2  12  -3   16.20    9.00
  -2 -12   3   13.10    8.60
   1  12  -3    8.30    8.50
  -1 -12   3   23.20    9.00
   0  12  -3   30.80    9.80
   0 -12   3   30.40    8.50
  -1  12  -3   27.00    9.40
   1 -12   3   29.10    8.20
  -2  12  -3   -8.00    6.60
   2 -12   3    4.50    5.80
  -3  12  -3   15.50    8.20
   3 -12   3   13.00    6.70
  -4  12  -3   39.00    9.70
   4 -12   3   11.70    6.80
  -5  12  -3   31.70   10.30
   5 -12   3   36.00    9.10
  -6  12  -3   60.79   13.10
   6 -12   3   85.69   12.80
   6 -12   3   42.90    5.50
  -7  12  -3   10.10    8.50
   7 -12   3    6.40    6.70
   7 -12   3   15.10    8.70
   7 -12   3    2.10    4.80
  -8  12  -3   40.30   11.40
   8 -12   3   46.00   11.90
   8 -12   3   48.00    9.50
  -9  12  -3   11.60   10.20
   9 -12   3   14.20    9.10
   9 -12   3    5.50    7.20
 -10  12  -3   38.80   13.80
  10 -12   3    2.10   10.60
 -11  12  -3   22.30   12.60
  11 -12   3   11.30   10.20
  11 -12   3   -8.40    8.40
 -12  12  -3   -7.00   12.80
  12 -12   3   14.00   10.40
  12 -12   3  -18.60    9.70
  14 -12   3   61.79   17.50
   7  11  -3    5.00   16.10
   6  11  -3  -17.60   12.30
  -6 -11   3   -2.10   12.20
   5  11  -3    6.20   11.00
  -5 -11   3   21.90   11.30
   4  11  -3   12.10   10.10
  -4 -11   3  -10.20    8.00
   3  11  -3   33.80   10.00
  -3 -11   3   39.20   11.20
   2  11  -3   52.99   11.20
  -2 -11   3   67.99   12.00
   1  11  -3   68.49   12.20
  -1 -11   3   67.89   10.30
   0  11  -3    9.40    6.90
   0 -11   3   -0.80    4.70
  -1  11  -3  312.67   20.30
   1 -11   3  304.17   17.80
  -2  11  -3  535.25   27.40
   2 -11   3  566.64   26.00
  -3  11  -3  263.97   19.00
   3 -11   3  223.88   16.30
  -4  11  -3    9.80    7.40
   4 -11   3    2.00    4.30
  -5  11  -3  600.24   30.50
   5 -11   3  542.35   17.20
   5 -11   3  542.65   14.80
   5 -11   3  585.74   28.00
  -6  11  -3  725.03   35.00
   6 -11   3  685.43   24.40
   6 -11   3  732.33   23.10
   6 -11   3  765.42   33.70
  -7  11  -3  306.37   23.40
   7 -11   3  313.27   21.90
   7 -11   3  329.57   20.20
   7 -11   3  315.47   16.20
  -8  11  -3   14.40    8.10
   8 -11   3    6.00    5.30
   8 -11   3   13.20    8.20
  -9  11  -3  241.08   23.20
   9 -11   3  305.37   19.20
   9 -11   3  224.28   21.00
 -10  11  -3  167.28   21.40
  10 -11   3  193.58   17.60
  10 -11   3  196.48   20.40
 -11  11  -3  247.88   32.80
  11 -11   3  250.07   21.40
  11 -11   3  207.38   21.90
 -12  11  -3   14.70   12.60
  12 -11   3   11.10   10.80
  12 -11   3   21.40   10.40
 -13  11  -3   28.20   13.60
  13 -11   3   13.90   11.80
  13 -11   3   22.70   12.40
 -14  11  -3   40.20   16.20
  14 -11   3   71.59   16.50
  14 -11   3    6.90   15.80
   8  10  -3   56.19   15.90
   7  10  -3  117.69   21.30
   6  10  -3  148.09   20.90
   6  10  -3  116.29   12.00
  -6 -10   3  147.59   19.20
   5  10  -3   73.79   14.50
   5  10  -3   37.30    9.00
  -5 -10   3   67.79   13.10
   4  10  -3   61.09   14.10
   4  10  -3   54.49    4.40
  -4 -10   3   57.39   11.20
   3  10  -3  123.79   15.10
  -3 -10   3  146.79   13.40
   2  10  -3  184.08   15.80
  -2 -10   3  160.98   13.40
   1  10  -3  417.66   23.10
  -1 -10   3  446.16   21.10
   0  10  -3    1.80    5.50
   0 -10   3    9.10    4.40
  -1  10  -3  165.78   14.10
   1 -10   3  143.89   11.60
  -2  10  -3  129.79   13.20
   2 -10   3  140.89   11.80
  -3  10  -3  349.87   21.30
   3 -10   3  332.97   18.80
  -4  10  -3    1.40    5.40
   4 -10   3    1.60    4.10
  -5  10  -3   62.69   11.20
   5 -10   3   55.19   10.10
   5 -10   3   53.19    5.60
   5 -10   3   49.99    6.90
   6 -10   3    5.60    3.80
   6 -10   3   -2.30    4.70
   6 -10   3   -3.40    5.30
  -7  10  -3   -2.80    6.00
   7 -10   3    6.70    4.00
   7 -10   3   -0.50    4.40
  -8  10  -3   11.00    7.40
   8 -10   3    1.80    5.10
   8 -10   3    0.70    4.50
  -9  10  -3   24.00    9.00
   9 -10   3   39.70   11.20
   9 -10   3   21.90    7.70
 -10  10  -3    6.50    9.10
  10 -10   3   -2.70    6.70
  10 -10   3   18.30    7.30
 -11  10  -3   23.50   11.50
  11 -10   3   13.40    9.30
  11 -10   3   11.20    7.60
 -12  10  -3  -11.30    8.80
  12 -10   3   -3.70    7.90
  12 -10   3   12.90    9.80
 -13  10  -3   -7.20   11.40
  13 -10   3   20.00    9.90
 -14  10  -3   -9.10   11.80
  14 -10   3   -3.60   11.20
  15 -10   3   19.20   15.10
   9   9  -3   20.60   13.30
   8   9  -3  138.09   22.00
   8   9  -3  106.39   16.00
   7   9  -3   17.90    8.20
   7   9  -3   17.20   11.20
   6   9  -3   44.10   11.70
   6   9  -3   57.29   10.10
  -6  -9   3   34.80   10.10
   5   9  -3  246.88   21.00
  -5  -9   3  238.38   19.50
   4   9  -3  461.15   16.70
   4   9  -3  455.95   25.90
  -4  -9   3  474.45   24.10
   3   9  -3   -1.70    2.80
   3   9  -3    1.20    6.30
   3   9  -3    3.50    2.10
  -3  -9   3    2.50    4.90
   2   9  -3  135.59   13.60
  -2  -9   3  156.48   12.10
   1   9  -3  477.05   23.80
  -1  -9   3  453.35   20.30
   0   9  -3  861.71   33.00
   0  -9   3  906.01   30.20
   0  -9   3  760.92   32.70
  -1   9  -3    1.50    4.00
   1  -9   3    3.80    3.70
   1  -9   3   -4.40    5.10
  -2   9  -3    0.90    5.10
   2  -9   3    2.10    2.90
  -3   9  -3  386.76   22.00
   3  -9   3  425.56   20.00
  -4   9  -3  441.56   24.30
   4  -9   3  429.66   13.80
   4  -9   3  443.56   14.60
   4  -9   3  444.66   21.50
  -5   9  -3   27.30    7.30
   5  -9   3   29.40    4.80
   5  -9   3   25.60    6.90
   5  -9   3   26.30    5.60
  -6   9  -3    2.10    5.70
   6  -9   3    1.80    5.40
   6  -9   3   -0.50    3.90
   6  -9   3    2.30    3.10
  -7   9  -3  537.85   30.30
   7  -9   3  558.14   23.20
   7  -9   3  520.95   27.00
  -8   9  -3  556.84   31.60
   8  -9   3  517.65   28.20
   8  -9   3  514.75   24.50
  -9   9  -3   12.90    8.90
   9  -9   3   45.00    9.20
   9  -9   3    8.20    5.90
 -10   9  -3   -4.90    6.80
  10  -9   3    2.90    5.40
  10  -9   3   10.90    6.90
 -11   9  -3  196.68   22.70
  11  -9   3  151.78   18.10
  11  -9   3  146.29   16.60
 -12   9  -3  153.48   22.00
  12  -9   3  221.38   20.80
  12  -9   3  196.48   22.00
 -13   9  -3   41.40   13.80
  13  -9   3   22.80   10.30
  13  -9   3   35.00   13.40
 -14   9  -3   17.30   12.80
  14  -9   3   20.30   12.20
  14  -9   3   16.50   13.30
 -15   9  -3   -8.00   20.40
  15  -9   3   14.70   13.50
  10   8  -3   27.30   12.90
  10   8  -3   47.60   16.50
   9   8  -3  150.58   22.40
   9   8  -3  134.99   18.20
   8   8  -3  113.89   15.00
   8   8  -3  133.99   19.30
   7   8  -3  142.89   18.30
   6   8  -3   15.10    6.10
   6   8  -3    2.80    7.90
  -6  -8   3   11.30    6.70
   5   8  -3  245.68   13.70
   5   8  -3  226.68   21.70
  -5  -8   3  216.08   17.30
   4   8  -3  108.89   12.80
   4   8  -3   75.79    7.40
  -4  -8   3   88.29   10.70
   3   8  -3   81.39    6.10
   3   8  -3   72.19   10.20
   3   8  -3   63.49    6.60
  -3  -8   3   59.69    8.80
   2   8  -3   95.49    9.90
   2   8  -3  114.29   11.60
   2   8  -3   92.09    4.00
   2   8  -3   89.29    3.80
  -2  -8   3  113.09    9.80
   1   8  -3   41.70    7.00
   1   8  -3   55.99    8.40
  -1  -8   3   49.10    6.60
  -1  -8   3   49.10    7.70
   0   8  -3  201.78   12.30
   0   8  -3  184.68   13.50
   0  -8   3  210.98   12.00
   0  -8   3  205.18   12.50
  -1   8  -3   95.59    8.60
  -1   8  -3  111.49   10.70
   1  -8   3  101.19    9.80
   1  -8   3  111.49    8.80
  -2   8  -3  414.76   20.70
  -2   8  -3  368.16   17.20
   2  -8   3  369.56   19.30
   2  -8   3  399.56   17.80
  -3   8  -3   59.99    8.70
   3  -8   3   61.59    9.50
   3  -8   3   60.69    3.60
   3  -8   3   59.39    7.30
  -4   8  -3  192.28   14.70
   4  -8   3  181.48    9.90
   4  -8   3  205.08    9.40
   4  -8   3  192.58   13.00
  -5   8  -3  244.28   17.90
   5  -8   3  258.47   13.90
   5  -8   3  244.28   12.40
   5  -8   3  277.97   16.50
  -6   8  -3  295.57   20.40
   6  -8   3  281.97   17.80
   6  -8   3  284.97   14.90
   6  -8   3  253.47   15.70
  -7   8  -3    3.30    6.80
   7  -8   3   -1.00    3.70
   7  -8   3   -1.00    2.90
  -8   8  -3  215.18   19.00
   8  -8   3  184.48   14.40
   8  -8   3  154.38   14.80
  -9   8  -3   51.99   12.00
   9  -8   3   30.50    9.00
   9  -8   3   41.00    8.80
 -10   8  -3   20.20    9.50
  10  -8   3   27.70    8.40
  10  -8   3   23.40    8.50
 -11   8  -3   12.10   10.30
  11  -8   3   -2.00    6.70
  11  -8   3   10.50    7.60
  12  -8   3    3.60   10.20
  12  -8   3    3.40    7.90
 -13   8  -3   21.30   12.10
  13  -8   3   13.30   10.80
  13  -8   3   51.59   13.60
 -14   8  -3    0.00   11.00
  14  -8   3    4.80   11.20
 -15   8  -3    8.30   13.50
  15  -8   3   29.00   15.90
  11   7  -3   64.79   14.80
  11   7  -3   32.20   16.00
  10   7  -3   94.09   17.70
  10   7  -3   91.29   16.30
   9   7  -3   47.70   13.80
   9   7  -3   80.99   14.80
   8   7  -3    7.50    8.50
   8   7  -3   11.80    7.20
   7   7  -3  288.87   22.80
   7   7  -3  231.88   20.10
   6   7  -3  499.15   27.60
   6   7  -3  494.65   22.80
  -6  -7   3  554.84   27.50
   5   7  -3  215.98   13.30
   5   7  -3  220.08   17.50
  -5  -7   3  264.77   17.30
   4   7  -3   97.69    8.10
   4   7  -3   97.29   11.30
   4   7  -3  102.59    9.60
  -4  -7   3   98.99   10.00
   3   7  -3  537.25   19.50
   3   7  -3  549.74   21.40
   3   7  -3  621.44   26.60
  -3  -7   3  559.34   22.70
   2   7  -3 1061.99   35.30
   2   7  -3 1103.99   26.80
   2   7  -3 1112.89   37.20
   2   7  -3 1082.09   27.40
   2   7  -3 1031.70   36.30
  -2  -7   3 1077.99   33.20
   1   7  -3  240.98   14.70
   1   7  -3  250.87   12.70
  -1  -7   3  235.08   13.40
  -1  -7   3  288.97   13.40
   0   7  -3  129.79    8.80
   0   7  -3  137.79   10.80
   0  -7   3  131.99    8.90
   0  -7   3  108.69   10.60
  -1   7  -3  257.87   13.00
  -1   7  -3  262.97   15.20
   1  -7   3  274.37   13.00
  -2   7  -3  303.67   16.90
   2  -7   3  324.67   17.20
   2  -7   3  332.97   15.00
  -3   7  -3  219.38   14.70
  -3   7  -3  195.88   11.90
   3  -7   3  200.88    8.70
   3  -7   3  171.58   13.20
   3  -7   3  215.08    8.30
   3  -7   3  181.68   11.70
  -4   7  -3   21.10    6.10
   4  -7   3   15.70    3.90
   4  -7   3    7.40    3.50
   4  -7   3   13.20    5.60
  -5   7  -3   20.30    6.20
   5  -7   3   18.40    4.10
   5  -7   3   20.30    5.10
   5  -7   3   22.20    5.30
  -6   7  -3  283.57   19.50
   6  -7   3  285.47   16.70
   6  -7   3  275.07   17.00
   6  -7   3  269.87   14.80
  -7   7  -3  529.25   28.70
   7  -7   3  543.45   24.00
   7  -7   3  540.65   26.00
  -8   7  -3   -1.80    5.10
   8  -7   3    4.20    4.30
   8  -7   3   -1.20    3.40
  -9   7  -3   38.00   10.20
   9  -7   3   31.10    8.60
   9  -7   3   30.90    8.30
 -10   7  -3  437.66   29.50
  10  -7   3  392.26   25.60
  10  -7   3  389.76   24.70
 -11   7  -3  495.25   33.30
  11  -7   3  563.44   32.50
  11  -7   3  521.65   30.60
 -12   7  -3  -11.00    7.10
  12  -7   3   -3.00    7.10
  12  -7   3    8.80    8.80
 -13   7  -3   43.30   13.60
  13  -7   3    6.70   10.00
  13  -7   3   42.60   11.50
 -14   7  -3  127.49   22.20
  14  -7   3  102.49   18.90
  14  -7   3   79.99   16.30
 -15   7  -3  106.79   21.90
  15  -7   3  134.99   24.30
  12   6  -3   68.09   16.80
  12   6  -3   31.20   16.50
  12   6  -3   36.10   18.20
  11   6  -3   75.39   15.80
  11   6  -3   74.19   16.40
  11   6  -3   51.29   16.00
  10   6  -3  199.08   20.30
  10   6  -3  299.77   26.10
   9   6  -3  118.49   17.40
   9   6  -3  101.09   14.00
   8   6  -3   86.69   12.20
   8   6  -3   90.39   14.10
   7   6  -3   -2.10    5.70
   7   6  -3   -1.80    4.40
   6   6  -3  214.68   20.50
   6   6  -3  185.88   13.80
  -6  -6   3  215.18   16.70
   5   6  -3   82.59    8.60
   5   6  -3   82.09   10.60
  -5  -6   3   54.19    8.50
   4   6  -3  120.89   11.50
   4   6  -3  104.49    9.40
   4   6  -3  114.79   10.10
   4   6  -3  116.59    8.60
  -4  -6   3  105.39    9.60
   3   6  -3   98.99    8.10
   3   6  -3  114.89   10.10
   3   6  -3   99.09   10.20
   3   6  -3  114.39    8.40
   3   6  -3  100.69    7.00
  -3  -6   3  124.19    9.00
   2   6  -3  177.38    8.60
   2   6  -3  183.68    9.90
   2   6  -3  164.88   11.90
   2   6  -3  193.98    8.10
   2   6  -3  202.18   12.90
  -2  -6   3  178.58   11.00
  -2  -6   3  177.78   10.20
   1   6  -3   95.09    6.80
   1   6  -3   91.09    3.60
   1   6  -3   93.89    3.90
   1   6  -3   90.99    8.40
  -1  -6   3   88.79    7.90
  -1  -6   3   82.69    6.40
   0   6  -3    5.50    2.80
   0   6  -3    0.10    1.80
   0  -6   3    0.40    2.60
   0  -6   3    1.90    1.80
  -1   6  -3    5.30    2.40
  -1   6  -3    0.20    2.20
   1  -6   3    4.40    2.10
   1  -6   3    9.60    3.40
  -2   6  -3   34.40    5.50
   2  -6   3   22.70    5.30
   2  -6   3   22.60    2.30
   2  -6   3   21.20    4.00
  -3   6  -3   12.40    4.90
  -3   6  -3    9.50    3.20
   3  -6   3   17.90    3.40
   3  -6   3   15.00    2.90
   3  -6   3   14.60    4.50
   3  -6   3   14.50    3.80
  -4   6  -3   76.89    9.10
  -4   6  -3   71.49    7.20
  -4   6  -3   63.29    6.40
   4  -6   3   77.89    7.50
   4  -6   3   73.19    9.30
   4  -6   3   58.59    6.50
  -5   6  -3  286.07   18.10
  -5   6  -3  309.87   16.50
   5  -6   3  328.97   17.00
  -6   6  -3  130.99   11.50
  -6   6  -3  120.09   12.70
   6  -6   3  129.89   11.90
   6  -6   3  155.28   12.10
  -7   6  -3  127.19   12.50
  -7   6  -3   93.49   12.70
   7  -6   3  117.69   11.60
  -8   6  -3   91.39   13.10
  -8   6  -3   77.09   11.70
   8  -6   3   57.29    9.20
  -9   6  -3   54.39   10.70
  -9   6  -3   63.99   11.50
   9  -6   3   61.09   10.40
   9  -6   3   30.50    7.50
 -10   6  -3  146.99   17.70
  10  -6   3  128.89   15.60
  10  -6   3  126.79   14.80
 -11   6  -3   29.40   11.30
  11  -6   3   31.10    8.50
  11  -6   3   59.99   12.90
 -12   6  -3  111.09   17.40
  12  -6   3   99.29   17.10
  12  -6   3   93.69   16.40
 -13   6  -3   11.50   10.90
  13  -6   3   12.20    9.90
  13  -6   3   19.90   10.20
 -14   6  -3   46.10   15.80
  14  -6   3   30.40   12.50
  14  -6   3   42.00   12.70
  15  -6   3   65.69   16.80
  12   5  -3   -1.80   13.60
  12   5  -3  -19.30    9.80
  12   5  -3   -1.00   11.50
  11   5  -3   -5.60    8.60
  11   5  -3  -18.80   13.20
  11   5  -3    9.90   11.80
  10   5  -3   46.50   11.50
  10   5  -3   78.69   15.60
   9   5  -3   19.10    8.40
   9   5  -3   10.80    7.30
   8   5  -3   -2.00    5.00
   8   5  -3    1.70    6.50
   7   5  -3   71.09    9.90
   7   5  -3   83.29   12.00
   6   5  -3   98.39   12.10
   6   5  -3  107.09   10.40
   5   5  -3   22.20    6.40
   5   5  -3   18.70    5.00
   5   5  -3   23.30    6.70
  -5  -5   3   23.00    5.70
   4   5  -3    2.40    3.00
   4   5  -3   -4.60    3.50
   4   5  -3    9.30    3.20
  -4  -5   3    3.30    3.40
   3   5  -3   24.00    4.60
   3   5  -3   23.50    4.50
   3   5  -3   29.90    6.20
   3   5  -3   20.90    3.60
   3   5  -3   24.30    5.30
  -3  -5   3   19.90    4.30
   2   5  -3   12.00    2.70
   2   5  -3    8.50    3.60
   2   5  -3   15.80    3.30
   2   5  -3    8.60    2.70
  -2  -5   3   11.50    3.70
   1   5  -3   15.10    2.00
   1   5  -3   12.90    3.90
   1   5  -3   16.50    3.20
  -1  -5   3   12.30    2.70
  -1  -5   3   23.40    4.50
   0   5  -3  775.82   22.20
   0   5  -3  811.42   26.30
   0  -5   3  772.42   22.10
   0  -5   3  742.33   24.60
  -1   5  -3  824.62   23.50
  -1   5  -3  800.42   27.00
   1  -5   3  836.92   23.60
   1  -5   3  762.92   26.00
  -2   5  -3  192.58   11.90
  -2   5  -3  172.48    9.10
  -2   5  -3  170.18    7.60
   2  -5   3  171.18    9.20
   2  -5   3  188.48    7.50
   2  -5   3  188.98   11.70
  -3   5  -3  340.87   14.60
  -3   5  -3  372.56   14.50
  -3   5  -3  331.37   17.20
   3  -5   3  345.27   14.90
   3  -5   3  358.76   13.70
   3  -5   3  355.06   17.60
  -4   5  -3  895.91   29.30
  -4   5  -3  877.71   32.30
  -4   5  -3  885.71   28.30
   4  -5   3  906.61   29.10
   4  -5   3  857.41   28.20
   4  -5   3  905.01   32.50
  -5   5  -3 1062.09   36.90
  -5   5  -3 1194.48   40.40
   5  -5   3 1148.99   40.50
   5  -5   3 1125.49   36.50
   5  -5   3 1181.48   36.90
  -6   5  -3  136.19   12.50
  -6   5  -3  151.48   12.70
   6  -5   3  137.99   11.20
  -7   5  -3 1698.73   55.89
  -7   5  -3 1710.83   56.99
   7  -5   3 1707.43   52.99
  -8   5  -3  829.62   37.50
  -8   5  -3  814.82   41.30
   8  -5   3  867.61   37.40
  -9   5  -3  810.72   38.90
  -9   5  -3  718.43   37.10
   9  -5   3  793.22   34.80
 -10   5  -3  232.08   21.20
 -10   5  -3  214.88   20.40
  10  -5   3  221.98   19.00
  10  -5   3  236.98   18.70
 -11   5  -3  250.67   23.30
  11  -5   3  250.77   21.60
  11  -5   3  277.07   22.40
 -12   5  -3  189.58   22.50
  12  -5   3  147.69   18.10
  12  -5   3  217.68   21.20
 -13   5  -3  168.38   23.00
  13  -5   3  136.09   19.30
  13  -5   3  159.88   20.30
 -14   5  -3   51.59   13.50
  14  -5   3   15.90   11.10
  14  -5   3   64.59   16.70
  15  -5   3   14.60   13.00
  13   4  -3   -5.90   11.50
  13   4  -3   10.60   12.20
  13   4  -3   -0.70   14.40
  12   4  -3  237.38   24.30
  12   4  -3  231.38   24.40
  12   4  -3  250.37   26.50
  11   4  -3  165.38   19.10
  11   4  -3  159.28   19.60
  11   4  -3  212.78   34.60
  10   4  -3   25.10    9.50
  10   4  -3   18.60    9.80
   9   4  -3   96.19   14.50
   9   4  -3  100.89   13.90
   8   4  -3  354.96   22.60
   8   4  -3  305.87   20.20
   7   4  -3  201.58   15.60
   7   4  -3  207.78   17.00
   6   4  -3   19.80    4.90
   6   4  -3   18.50    5.90
   5   4  -3   62.29    7.10
   5   4  -3   60.69    8.30
   5   4  -3   53.99    7.50
   5   4  -3   52.49    9.20
  -5  -4   3   52.79    7.60
   4   4  -3   22.20    5.50
   4   4  -3   14.50    4.00
   4   4  -3   14.40    4.10
   4   4  -3   20.60    5.40
  -4  -4   3   17.10    4.30
   3   4  -3  497.05   18.90
   3   4  -3  465.15   16.70
   3   4  -3  499.95   17.30
   3   4  -3  486.05   19.80
   2   4  -3   40.30    4.50
   2   4  -3   38.40    5.20
   2   4  -3   33.30    3.70
   2   4  -3   35.00    3.60
  -2  -4   3   37.20    4.10
  -2  -4   3   39.90    4.90
   1   4  -3  404.06   16.20
   1   4  -3  372.66   12.20
   1   4  -3  391.36   11.20
   1   4  -3  408.36   12.20
  -1  -4   3  398.96   12.70
  -1  -4   3  380.26   14.90
   0   4  -3  711.13   16.40
   0   4  -3  714.43   19.40
   0   4  -3  713.43   23.70
   0  -4   3  722.63   16.20
   0  -4   3  717.53   22.50
   0  -4   3  718.23   19.30
  -1   4  -3  883.61   23.80
  -1   4  -3  882.51   28.10
  -1   4  -3  921.51   21.60
   1  -4   3  912.21   21.00
   1  -4   3  892.71   23.90
   1  -4   3  887.51   27.40
  -2   4  -3   37.90    3.80
  -2   4  -3   41.70    4.00
  -2   4  -3   32.20    5.20
   2  -4   3   42.70    3.80
   2  -4   3   44.30    4.40
   2  -4   3   36.80    5.50
  -3   4  -3  258.07   11.30
  -3   4  -3  210.28   10.70
  -3   4  -3  224.68   13.10
   3  -4   3  232.38   11.20
   3  -4   3  243.48   13.70
   3  -4   3  237.28   11.10
  -4   4  -3    3.40    2.70
  -4   4  -3    4.00    2.60
   4  -4   3    6.40    2.60
   4  -4   3    6.70    3.90
   4  -4   3    7.20    3.30
  -5   4  -3    2.30    3.60
  -5   4  -3    0.20    2.30
   5  -4   3    1.80    4.20
   5  -4   3    0.80    3.70
   5  -4   3    1.90    2.10
  -6   4  -3  110.39   11.40
  -6   4  -3   98.79   10.80
   6  -4   3   82.39    8.70
  -7   4  -3   95.49   10.90
  -7   4  -3   94.29   11.20
   7  -4   3  109.19   10.40
  -8   4  -3  129.29   14.20
  -8   4  -3  122.89   15.90
   8  -4   3  138.39   15.20
  -9   4  -3  268.57   20.90
  -9   4  -3  252.57   20.80
   9  -4   3  209.68   16.50
 -10   4  -3  127.99   15.60
 -10   4  -3  154.48   17.40
  10  -4   3  163.38   16.00
 -11   4  -3   31.60   11.10
 -11   4  -3   46.30   12.30
  11  -4   3   35.20    9.80
  11  -4   3   21.80    7.80
 -12   4  -3   19.70    9.80
  12  -4   3    8.10    6.80
  12  -4   3   -2.80    5.90
 -13   4  -3  164.98   22.00
  13  -4   3  158.58   20.80
  13  -4   3  209.88   22.30
 -14   4  -3   39.60   14.30
  14  -4   3   42.20   14.30
 -15   4  -3   29.10   20.40
  15  -4   3   34.10   12.90
  13   3  -3   12.00   11.80
  13   3  -3  -13.20    9.70
  12   3  -3   -1.80    7.90
  12   3  -3    2.90    9.40
  12   3  -3    2.00   10.40
  11   3  -3   53.49   11.40
  11   3  -3   55.89   13.30
  11   3  -3   32.70   12.30
  10   3  -3   43.60    9.40
  10   3  -3   36.50    9.10
  10   3  -3   36.90   10.30
   9   3  -3   10.30    6.10
   9   3  -3   13.70    6.90
   8   3  -3   12.00    6.20
   8   3  -3   22.10    6.80
   7   3  -3  244.18   17.40
   7   3  -3  267.87   17.40
   6   3  -3  199.08   13.60
   6   3  -3  166.78   13.10
   6   3  -3  186.78   13.30
   5   3  -3  131.39    9.80
   5   3  -3  118.99   10.00
   5   3  -3  125.59   11.40
   5   3  -3  134.69   11.50
   4   3  -3  219.28   14.70
   4   3  -3  194.28   10.70
   4   3  -3  185.78   12.70
   4   3  -3  208.78   11.40
   4   3  -3  207.48   12.30
  -4  -3   3  193.48   11.60
   3   3  -3 1059.69   31.80
   3   3  -3 1036.70   31.20
   3   3  -3 1014.80   32.30
   3   3  -3 1057.89   29.80
   3   3  -3 1036.20   28.30
  -3  -3   3 1042.20   29.70
   2   3  -3  857.81   23.00
   2   3  -3  842.92   24.60
   2   3  -3  818.12   22.00
   2   3  -3  850.81   25.90
   2   3  -3  843.52   26.20
  -2  -3   3  835.82   25.00
  -2  -3   3  843.72   22.80
   1   3  -3    7.70    1.60
   1   3  -3    7.30    2.30
   1   3  -3    8.80    1.70
  -1  -3   3    4.50    1.20
  -1  -3   3    6.10    1.70
  -1  -3   3    7.60    2.70
   0   3  -3 1313.97   35.40
   0   3  -3 1316.87   29.90
   0  -3   3 1353.76   30.50
   0  -3   3 1340.87   34.90
   0  -3   3 1342.57   29.70
  -1   3  -3 7483.75  156.28
  -1   3  -3 7421.16  161.38
  -1   3  -3 7430.86  155.78
   1  -3   3 7377.36  156.38
   1  -3   3 7320.27  160.88
  -2   3  -3 3159.18   75.29
  -2   3  -3 3112.19   71.19
   2  -3   3 3139.89   74.99
   2  -3   3 3140.19   70.99
   2  -3   3 3139.99   70.99
  -3   3  -3  867.71   27.20
  -3   3  -3  888.91   29.50
   3  -3   3  884.21   29.30
   3  -3   3  923.21   26.50
   3  -3   3  937.41   27.30
  -4   3  -3  208.78   13.10
  -4   3  -3  196.78   12.00
   4  -3   3  213.08   13.40
   4  -3   3  215.88   11.40
   4  -3   3  196.48   11.70
  -5   3  -3 2893.51   75.79
  -5   3  -3 2781.02   76.09
   5  -3   3 2922.61   76.79
   5  -3   3 2861.71   74.59
   5  -3   3 2913.91   72.39
  -6   3  -3 4892.11  120.99
  -6   3  -3 4863.21  120.99
   6  -3   3 4851.41  116.29
  -7   3  -3  179.58   15.00
  -7   3  -3  179.68   15.50
   7  -3   3  187.58   13.60
  -8   3  -3    0.70    4.40
  -8   3  -3   -0.70    3.80
   8  -3   3   -2.40    2.50
  -9   3  -3  386.06   26.70
  -9   3  -3  417.86   26.10
   9  -3   3  416.76   23.90
 -10   3  -3  808.22   41.60
 -10   3  -3  728.63   37.90
  10  -3   3  776.82   35.80
 -11   3  -3   20.60   10.30
 -11   3  -3   30.50    9.80
  11  -3   3    9.50    7.50
  11  -3   3   20.50    8.20
 -12   3  -3    3.90    8.60
  12  -3   3    0.70    7.60
  12  -3   3    3.90    5.80
 -13   3  -3   -6.60    9.20
  13  -3   3    6.20    7.90
  13  -3   3   -7.10    6.40
 -14   3  -3  129.29   22.70
  14  -3   3  139.69   21.50
  15  -3   3   58.29   18.60
  15  -3   3   44.60   16.10
  14   2  -3  -13.90   12.70
  14   2  -3   -8.10   12.30
  14   2  -3   -8.80   11.30
  13   2  -3  107.49   19.70
  13   2  -3  104.49   20.20
  13   2  -3  126.49   20.40
  12   2  -3   56.99   14.20
  12   2  -3   45.80   12.40
  12   2  -3   53.59   12.10
  11   2  -3  115.59   16.20
  11   2  -3   85.59   15.40
  11   2  -3  102.89   14.60
 -11  -2   3  133.09   17.80
  10   2  -3   13.80    6.60
  10   2  -3    6.90    6.10
 -10  -2   3   -2.20    6.50
   9   2  -3  147.79   15.10
   9   2  -3  136.09   13.30
  -9  -2   3  175.58   17.20
   8   2  -3   17.00    7.20
  -8  -2   3   15.90    6.90
   7   2  -3  300.67   18.40
  -7  -2   3  302.97   19.60
   6   2  -3   -2.40    3.10
   6   2  -3    4.80    3.90
  -6  -2   3    2.10    3.30
   5   2  -3   12.00    4.30
   5   2  -3   15.70    4.50
   5   2  -3   13.30    4.60
   5   2  -3    5.40    3.30
  -5  -2   3    3.80    3.30
   4   2  -3   22.70    5.00
   4   2  -3   19.40    4.00
   4   2  -3   17.80    4.90
   4   2  -3   14.90    4.30
   4   2  -3   23.20    5.00
  -4  -2   3   18.80    4.60
   3   2  -3  413.36   16.20
   3   2  -3  395.86   14.20
   3   2  -3  395.66   16.40
   3   2  -3  426.86   17.50
   3   2  -3  408.76   17.10
   2   2  -3  739.03   22.20
   2   2  -3  734.93   19.00
   2   2  -3  683.53   22.30
   2   2  -3  697.13   20.20
  -2  -2   3  740.73   20.50
  -2  -2   3  737.73   19.70
   1   2  -3  307.87    8.00
   1   2  -3  313.57   12.00
   1   2  -3  316.67    9.80
  -1  -2   3  299.77   11.40
  -1  -2   3  326.17    9.90
  -1  -2   3  313.07    8.40
   0   2  -3  512.85   16.50
   0   2  -3  509.05   11.90
   0   2  -3  504.75   13.30
   0  -2   3  471.05   15.70
   0  -2   3  520.05   13.20
   0  -2   3  512.85   11.90
  -1   2  -3   38.50    4.40
  -1   2  -3   35.90    3.20
   1  -2   3   40.50    4.50
   1  -2   3   37.90    2.80
   1  -2   3   41.90    3.30
  -2   2  -3  254.97   10.60
  -2   2  -3  230.58   11.50
   2  -2   3  236.18   11.40
   2  -2   3  250.17   10.40
  -3   2  -3  169.08   10.30
  -3   2  -3  188.58   12.70
   3  -2   3  154.48    9.30
   3  -2   3  174.88   10.50
   3  -2   3  157.28    9.80
  -4   2  -3  130.19    9.80
  -4   2  -3  144.39   10.70
   4  -2   3  137.69   10.00
   4  -2   3  137.09   10.50
   4  -2   3  129.69    9.80
  -5   2  -3   16.20    3.80
  -5   2  -3   27.30    5.30
   5  -2   3   31.70    7.00
   5  -2   3   19.50    5.20
  -6   2  -3  196.78   14.90
  -6   2  -3  205.28   15.20
  -7   2  -3   16.60    6.80
  -7   2  -3   12.00    4.70
  -8   2  -3   21.40    7.70
  -9   2  -3   16.00    5.60
  -9   2  -3    1.90    4.50
   9  -2   3   16.70    6.50
 -10   2  -3    7.40    5.60
 -10   2  -3   10.70    6.00
  10  -2   3    4.80    5.60
 -11   2  -3   26.40    8.60
 -11   2  -3   33.60   10.90
  11  -2   3   22.90    7.70
 -12   2  -3   30.90   12.80
  12  -2   3   42.70   12.90
  12  -2   3   34.50    9.60
 -13   2  -3    8.00    9.40
  13  -2   3    1.30    7.90
  13  -2   3    1.10    9.30
  14  -2   3    5.80   10.20
  14  -2   3   17.10   11.70
  15  -2   3   -9.30   11.60
  14   1  -3    0.70   11.40
  14   1  -3  -20.80   10.70
  14   1  -3    0.80   11.30
  13   1  -3   49.80   15.00
  13   1  -3   71.59   15.10
  13   1  -3   78.19   14.80
 -13  -1   3   61.49   16.50
  12   1  -3  185.68   19.20
  12   1  -3  194.38   25.00
 -12  -1   3  212.18   27.50
  11   1  -3   87.19   15.50
  11   1  -3   91.79   14.50
 -11  -1   3   75.69   15.90
  10   1  -3    2.20    5.80
  10   1  -3    1.10    5.40
 -10  -1   3   -4.80    6.00
   9   1  -3  132.59   12.90
   9   1  -3   90.89   12.10
  -9  -1   3  111.39   13.70
   8   1  -3 1720.13   53.09
   8   1  -3 1789.22   68.09
  -8  -1   3 1744.13   58.69
   7   1  -3  978.00   36.20
   7   1  -3  962.20   33.30
  -7  -1   3  952.50   37.50
   6   1  -3   30.00    5.80
  -6  -1   3   40.60    8.00
   5   1  -3 1449.06   41.60
   5   1  -3 1442.66   41.90
   5   1  -3 1343.07   43.50
   5   1  -3 1442.76   44.30
  -5  -1   3 1419.76   43.80
   4   1  -3 4650.53  105.69
   4   1  -3 4630.14  105.89
   4   1  -3 4645.94  109.19
   4   1  -3 4540.05  108.59
  -4  -1   3 4603.24  108.39
   3   1  -3 3052.09   70.29
   3   1  -3 3054.59   73.49
   3   1  -3 3072.49   73.39
  -3  -1   3 3019.90   73.09
   2   1  -3    2.20    1.60
   2   1  -3    1.80    1.00
   2   1  -3    3.20    1.70
   2   1  -3    0.60    1.20
  -2  -1   3    2.50    1.40
   1   1  -3 3187.68   70.89
   1   1  -3 3183.58   69.49
   1   1  -3 3160.88   66.69
  -1  -1   3 3177.08   69.39
  -1  -1   3 3221.98   70.69
   0   1  -3 3085.69   65.59
   0   1  -3 3106.69   67.49
   0   1  -3 3132.69   69.29
   0  -1   3 3154.18   68.79
   0  -1   3 3130.89   69.09
   0  -1   3 3096.09   65.39
  -1   1  -3 2555.74   57.99
  -1   1  -3 2560.94   57.79
  -1   1  -3 2564.44   59.19
   1  -1   3 2604.84   57.99
   1  -1   3 2541.85   59.09
   1  -1   3 2634.34   57.49
  -2   1  -3   64.89    5.70
  -2   1  -3   70.09    5.70
  -2   1  -3   76.99    5.80
   2  -1   3   66.09    5.40
   2  -1   3   85.79    6.30
   2  -1   3   68.49    5.50
  -3   1  -3  904.61   28.20
  -3   1  -3  901.61   28.40
   3  -1   3  911.81   28.30
   3  -1   3  915.71   27.80
   3  -1   3  882.41   27.70
  -4   1  -3 3043.40   75.09
  -4   1  -3 3039.70   75.99
   4  -1   3 3031.30   74.79
   4  -1   3 2841.22   74.79
   4  -1   3 2972.90   74.29
  -5   1  -3 1605.24   48.10
  -5   1  -3 1555.84   48.40
   5  -1   3 1660.13   47.90
   5  -1   3 1542.95   47.60
   5  -1   3 1577.44   47.70
  -6   1  -3   18.00    5.00
  -6   1  -3   13.70    5.40
  -7   1  -3  222.68   17.30
  -7   1  -3  226.18   16.20
  -8   1  -3  270.67   19.50
  -8   1  -3  229.48   19.70
  -9   1  -3  436.46   26.80
  -9   1  -3  443.06   28.60
 -10   1  -3   27.60    9.20
 -10   1  -3    7.90    7.20
 -11   1  -3   -3.50    7.10
 -11   1  -3   11.90    8.10
  11  -1   3    4.80    6.00
 -12   1  -3   15.70    9.40
  12  -1   3   32.60   12.80
  12  -1   3   32.50   11.90
 -13   1  -3  220.08   25.30
  13  -1   3  222.88   25.70
  13  -1   3  237.58   23.70
 -14   1  -3   28.80   13.70
  14  -1   3    6.30   10.60
  14  -1   3    6.90   11.20
  15  -1   3  -21.60   14.40
  15   0  -3   10.80   14.80
  14   0  -3   38.00   13.30
  14   0  -3   36.80   15.40
  13   0  -3  111.39   18.70
  13   0  -3   84.59   16.60
 -13   0   3  131.29   21.20
  12   0  -3  563.74   32.60
  12   0  -3  595.04   35.60
 -12   0   3  604.44   38.10
  11   0  -3   55.89   11.50
  11   0  -3   37.00    9.70
 -11   0   3   20.60    8.30
  10   0  -3    7.00    5.10
  10   0  -3   18.90    7.10
 -10   0   3   15.00    6.80
   9   0  -3  278.27   18.50
   9   0  -3  280.97   19.90
  -9   0   3  247.08   19.80
   8   0  -3 1406.26   50.69
   8   0  -3 1335.77   44.40
   7   0  -3  201.78   14.70
   7   0  -3  203.08   13.30
  -7   0   3  219.98   16.50
   6   0  -3   91.49    9.00
   6   0  -3   82.99    7.70
   6   0  -3   90.89    9.30
  -6   0   3   80.19    9.20
   5   0  -3   -0.20    2.50
   5   0  -3   -1.20    3.40
   5   0  -3    0.60    1.90
   5   0  -3    0.50    2.30
   5   0  -3    2.70    3.10
  -5   0   3    0.70    2.60
   4   0  -3 1192.98   36.70
   4   0  -3 1252.57   37.70
   4   0  -3 1208.48   33.20
   4   0  -3 1220.98   35.10
  -4   0   3 1233.28   36.80
   3   0  -3  961.80   30.20
   3   0  -3  996.90   29.50
   3   0  -3 1012.40   26.50
  -3   0   3  985.40   27.90
   2   0  -3   40.30    3.70
   2   0  -3   37.60    3.10
   2   0  -3   39.10    4.10
  -2   0   3   38.90    3.80
  -2   0   3   37.40    3.90
  -2   0   3   39.70    3.10
   1   0  -3    4.40    1.30
   1   0  -3    2.30    1.00
   1   0  -3    5.40    1.20
  -1   0   3    3.30    1.10
  -1   0   3    3.30    1.30
  -1   0   3    4.50    1.00
   0   0  -3   59.99    3.50
   0   0  -3   52.69    3.10
   0   0  -3   55.89    3.50
   0   0   3   54.19    3.50
   0   0   3   49.20    3.20
  -1   0  -3    1.40    1.40
  -1   0  -3   -1.40    0.70
  -1   0  -3   -0.50    1.10
   1   0   3    1.10    1.20
   1   0   3    2.00    1.30
   1   0   3    0.40    1.10
  -2   0  -3   38.30    4.40
  -2   0  -3   42.20    4.50
  -2   0  -3   50.59    4.60
   2   0   3   44.70    4.60
   2   0   3   38.40    4.20
   2   0   3   46.90    4.60
  -3   0  -3   37.30    4.80
  -3   0  -3   21.90    4.00
  -3   0  -3   26.60    4.10
   3   0   3   26.70    4.20
   3   0   3   25.00    4.20
   3   0   3   20.30    4.10
  -4   0  -3   24.40    5.10
  -4   0  -3   21.90    5.30
  -4   0  -3   23.30    5.00
   4   0   3   20.50    4.80
   4   0   3   11.70    4.40
   4   0   3   15.40    4.50
  -5   0  -3   16.80    4.60
  -5   0  -3   22.40    5.70
  -5   0  -3   21.90    5.70
   5   0   3   16.10    5.00
   5   0   3   24.30    6.20
   5   0   3   20.80    5.70
  -6   0  -3    0.90    2.80
  -6   0  -3    0.50    2.90
  -7   0  -3  147.99   14.40
  -7   0  -3  163.28   13.90
  -8   0  -3   73.99   11.10
  -8   0  -3   70.29   11.70
  -9   0  -3  127.39   16.20
  -9   0  -3  149.39   15.90
 -10   0  -3   33.90   10.30
 -10   0  -3   30.50    9.50
 -11   0  -3    6.10    8.10
 -11   0  -3    7.30    7.50
  11   0   3    9.20    7.20
 -12   0  -3   51.59   15.10
  12   0   3   37.00   12.10
  12   0   3   40.10   12.80
 -13   0  -3  177.38   23.80
  13   0   3  194.88   22.70
  13   0   3  134.69   21.60
 -14   0  -3   -6.50   13.00
  14   0   3    6.80   15.90
  14   0   3   18.70   12.70
  15  -1  -3    2.70   12.60
  15  -1  -3   -2.30   13.20
  14  -1  -3  121.19   22.10
  14  -1  -3   84.29   17.80
 -14   1   3  163.18   24.40
  13  -1  -3    5.80    8.80
  13  -1  -3   42.20   20.40
 -13   1   3   52.69   15.10
  12  -1  -3  119.39   16.10
  12  -1  -3  158.18   17.60
 -12   1   3  104.19   17.40
  11  -1  -3   94.79   15.20
  11  -1  -3  147.69   16.00
 -11   1   3  109.69   16.50
  10  -1  -3  234.08   18.10
  10  -1  -3  299.17   21.40
 -10   1   3  300.97   23.30
   9  -1  -3  203.58   17.00
   9  -1  -3  150.38   14.30
  -9   1   3  148.49   15.70
   8  -1  -3  119.99   11.40
   8  -1  -3  108.19   11.80
  -8   1   3  109.59   12.90
   7  -1  -3  477.25   23.00
   7  -1  -3  475.75   21.70
  -7   1   3  487.55   24.50
   6  -1  -3  303.57   16.40
   6  -1  -3  285.27   14.90
  -6   1   3  297.47   17.10
   5  -1  -3  175.38   12.60
   5  -1  -3  162.48   12.20
   5  -1  -3  185.08   10.70
   5  -1  -3  194.48   11.70
  -5   1   3  182.78   12.20
   4  -1  -3  528.35   18.60
   4  -1  -3  524.25   21.20
   4  -1  -3  529.95   19.40
   4  -1  -3  538.45   20.90
  -4   1   3  547.25   20.70
   3  -1  -3 2427.56   59.09
   3  -1  -3 2461.05   57.09
   3  -1  -3 2413.96   58.09
  -3   1   3 2426.96   58.79
  -3   1   3 2395.86   56.69
  -3   1   3 2386.16   57.59
   2  -1  -3 1069.29   27.70
   2  -1  -3 1073.29   28.10
  -2   1   3 1044.60   27.50
  -2   1   3 1069.09   27.30
  -2   1   3 1065.69   27.90
   1  -1  -3    4.80    1.30
   1  -1  -3    3.30    1.10
   1  -1  -3    2.90    1.30
   1  -1  -3    3.30    1.30
  -1   1   3    1.30    1.10
  -1   1   3    2.10    1.10
   0  -1  -3   64.79    4.20
   0  -1  -3   65.79    3.00
   0   1   3   69.09    2.90
   0   1   3   62.69    4.10
   0   1   3   70.99    4.30
  -1  -1  -3 1778.92   42.60
  -1  -1  -3 1776.32   40.10
  -1  -1  -3 1745.43   42.50
   1   1   3 1742.03   42.30
   1   1   3 1714.53   42.00
   1   1   3 1790.02   40.30
  -2  -1  -3  113.39    6.50
  -2  -1  -3  128.49    8.30
  -2  -1  -3  110.09    7.50
   2   1   3  109.49    7.30
   2   1   3  116.09    6.60
   2   1   3  115.69    7.20
  -3  -1  -3 4498.75  104.59
  -3  -1  -3 4485.85  104.79
  -3  -1  -3 4511.75  102.39
   3   1   3 4499.55  102.79
   3   1   3 4522.35  103.49
   3   1   3 4488.75  104.19
  -4  -1  -3  547.75   23.20
  -4  -1  -3  557.64   21.30
  -4  -1  -3  553.14   23.00
   4   1   3  536.95   21.70
   4   1   3  519.15   21.30
   4   1   3  572.34   25.50
  -5  -1  -3  149.99   12.30
  -5  -1  -3  172.68   12.30
  -5  -1  -3  167.58   13.10
   5   1   3  170.78   12.70
   5   1   3  147.09   11.90
  -6  -1  -3   28.80    6.80
  -6  -1  -3   20.80    6.40
  -6  -1  -3   30.50    8.30
  -7  -1  -3  510.75   27.60
  -7  -1  -3  516.05   25.90
  -8  -1  -3  243.38   20.90
  -9  -1  -3  127.69   16.80
  -9  -1  -3  114.99   14.30
 -10  -1  -3   19.10    8.90
 -10  -1  -3   22.40    9.20
 -11  -1  -3  116.19   18.00
 -11  -1  -3  157.98   20.80
  11   1   3  145.19   19.00
 -12  -1  -3  166.78   36.30
  12   1   3  169.98   21.90
 -13  -1  -3   34.80   14.60
  13   1   3   30.60   12.30
  13   1   3   25.80   13.00
 -14  -1  -3   55.79   17.70
  14   1   3   13.00   14.20
  15  -2  -3   -1.30   11.80
 -15   2   3  -14.40   15.20
  14  -2  -3  272.27   27.80
  14  -2  -3  281.97   27.00
 -14   2   3  315.77   30.70
  13  -2  -3  284.37   26.60
 -13   2   3  333.67   29.50
  12  -2  -3    8.50    7.70
  12  -2  -3   -4.20    6.40
 -12   2   3   10.20    8.70
  11  -2  -3   12.10    7.00
  11  -2  -3   20.40    7.10
 -11   2   3   27.10   10.70
  10  -2  -3  374.66   22.90
  10  -2  -3  359.46   24.00
 -10   2   3  387.56   26.00
   9  -2  -3  289.57   19.00
   9  -2  -3  241.48   17.90
  -9   2   3  254.77   19.60
   8  -2  -3    4.40    3.80
   8  -2  -3    2.20    3.50
  -8   2   3    1.30    3.30
   7  -2  -3   17.70    4.50
   7  -2  -3   20.60    5.50
  -7   2   3   22.50    6.80
   6  -2  -3    3.40    2.10
   6  -2  -3    0.60    2.30
  -6   2   3    1.60    3.10
   5  -2  -3 1765.02   50.49
   5  -2  -3 1693.23   46.40
   5  -2  -3 1627.84   48.80
   5  -2  -3 1657.73   46.70
  -5   2   3 1753.02   49.40
  -5   2   3 1630.04   45.20
   4  -2  -3  856.91   26.40
   4  -2  -3  852.21   26.30
   4  -2  -3  853.21   28.70
   4  -2  -3  824.92   27.70
  -4   2   3  793.82   25.70
  -4   2   3  810.12   27.20
  -4   2   3  804.82   25.60
   3  -2  -3  466.15   17.00
   3  -2  -3  468.15   17.00
   3  -2  -3  439.96   16.10
  -3   2   3  448.26   16.10
  -3   2   3  463.85   16.00
  -3   2   3  454.95   16.60
   2  -2  -3   71.89    5.30
   2  -2  -3   77.59    5.10
   2  -2  -3   64.19    4.80
  -2   2   3   74.89    5.10
  -2   2   3   76.69    5.00
  -2   2   3   85.79    5.70
   1  -2  -3   39.10    3.70
   1  -2  -3   36.50    3.40
   1  -2  -3   35.40    2.50
  -1   2   3   38.20    2.50
  -1   2   3   38.20    3.40
   0  -2  -3    9.00    2.10
   0  -2  -3   12.90    2.40
   0   2   3   13.30    2.40
   0   2   3   17.10    2.80
  -1  -2  -3  115.49    7.10
  -1  -2  -3   97.19    6.30
  -1  -2  -3  110.69    4.70
   1   2   3  115.39    6.60
   1   2   3  115.39    6.90
   1   2   3  108.69    4.90
  -2  -2  -3  168.28    8.00
  -2  -2  -3  182.48    9.90
  -2  -2  -3  153.18    9.40
   2   2   3  160.08    9.00
   2   2   3  178.18    8.40
   2   2   3  180.58    9.60
  -3  -2  -3    1.20    1.70
  -3  -2  -3    3.50    2.20
  -3  -2  -3   -1.70    2.20
   3   2   3    2.30    2.50
   3   2   3    4.40    2.40
   3   2   3    4.00    2.90
  -4  -2  -3   36.40    6.40
  -4  -2  -3   58.89    6.40
  -4  -2  -3   52.09    7.00
   4   2   3   40.40    6.10
   4   2   3   42.80    7.10
  -5  -2  -3  208.48   14.90
  -5  -2  -3  174.98   12.60
  -5  -2  -3  215.08   14.90
   5   2   3  175.88   13.10
  -6  -2  -3  357.76   19.20
  -6  -2  -3  329.27   20.60
  -6  -2  -3  352.66   21.30
  -7  -2  -3  280.37   21.00
  -7  -2  -3  257.37   17.90
  -7  -2  -3  301.07   21.20
  -8  -2  -3  145.89   15.40
  -8  -2  -3  131.69   16.00
  -9  -2  -3   28.80    8.90
  -9  -2  -3   32.50   10.00
 -10  -2  -3   60.59   14.20
 -10  -2  -3   67.39   13.40
 -11  -2  -3  212.08   22.00
  11   2   3  234.58   22.30
 -12  -2  -3  185.48   22.70
  12   2   3  227.48   23.40
 -13  -2  -3   -6.80   12.20
  13   2   3    7.00   12.70
  15  -3  -3   37.90   14.70
  15  -3  -3   28.70   14.20
  14  -3  -3   -2.80    9.30
  14  -3  -3   12.90   10.40
 -14   3   3   12.90   12.90
  13  -3  -3  126.89   18.70
 -13   3   3   93.79   19.10
  12  -3  -3   26.50    9.40
  12  -3  -3   20.40    8.40
 -12   3   3   14.30    8.40
  11  -3  -3   68.89   12.30
  11  -3  -3   83.39   13.50
 -11   3   3  117.79   15.60
  10  -3  -3    4.60    5.10
  10  -3  -3   -3.90    4.40
 -10   3   3   -3.70    5.20
   9  -3  -3  281.37   19.00
   9  -3  -3  314.47   20.50
  -9   3   3  318.57   22.20
   8  -3  -3   79.69   10.30
   8  -3  -3   52.79    8.40
  -8   3   3   73.99   10.30
   7  -3  -3   70.79    8.50
   7  -3  -3   51.99    7.90
  -7   3   3   70.69    9.40
   6  -3  -3  124.69   10.20
   6  -3  -3  122.59   10.20
  -6   3   3  144.39   11.90
   5  -3  -3  243.28   14.90
   5  -3  -3  247.18   13.60
   5  -3  -3  270.57   13.70
   5  -3  -3  233.18   14.50
  -5   3   3  252.07   14.50
  -5   3   3  245.88   13.30
   4  -3  -3  194.88   11.60
   4  -3  -3  172.38   10.50
   4  -3  -3  183.48   10.20
  -4   3   3  193.48   11.00
  -4   3   3  187.68   10.90
  -4   3   3  188.48   10.40
   3  -3  -3  108.19    7.80
   3  -3  -3  107.29    7.50
   3  -3  -3   96.79    7.00
  -3   3   3  106.39    7.20
  -3   3   3  100.69    6.70
   2  -3  -3    2.00    1.20
   2  -3  -3    1.10    1.30
   2  -3  -3    1.30    1.30
  -2   3   3    5.00    2.40
  -2   3   3    1.60    1.30
  -2   3   3    0.40    1.10
   1  -3  -3  494.65   12.90
   1  -3  -3  508.05   17.60
   1  -3  -3  512.45   15.10
  -1   3   3  489.15   14.80
  -1   3   3  491.55   12.60
  -1   3   3  494.95   17.10
   0  -3  -3   15.10    2.60
   0  -3  -3   12.70    3.00
   0   3   3    8.70    2.50
   0   3   3   20.30    2.80
  -1  -3  -3  751.92   22.80
  -1  -3  -3  815.92   24.80
   1   3   3  770.02   18.80
   1   3   3  738.33   24.00
   1   3   3  791.42   19.60
   1   3   3  750.32   22.30
  -2  -3  -3  335.47   15.10
  -2  -3  -3  323.77   11.70
  -2  -3  -3  327.37   16.30
   2   3   3  301.77   11.80
   2   3   3  295.77   13.20
   2   3   3  297.27   13.80
  -3  -3  -3 1724.83   47.70
  -3  -3  -3 1695.63   47.90
  -3  -3  -3 1643.14   43.90
   3   3   3 1685.13   46.10
   3   3   3 1635.44   44.00
  -4  -3  -3 3548.74   89.69
  -4  -3  -3 3542.45   89.39
  -4  -3  -3 3454.85   84.79
   4   3   3 3557.94   85.69
   4   3   3 3449.46   87.09
  -5  -3  -3  626.54   28.10
  -5  -3  -3  613.14   27.50
  -5  -3  -3  636.04   25.40
   5   3   3  613.44   25.80
  -6  -3  -3    3.50    4.60
  -6  -3  -3    6.40    4.40
  -6  -3  -3    4.00    3.30
  -7  -3  -3  901.31   39.80
  -7  -3  -3  937.31   46.10
  -7  -3  -3  883.81   36.10
  -8  -3  -3 1279.17   52.89
  -8  -3  -3 1433.06   50.79
  -9  -3  -3   84.99   13.60
  -9  -3  -3  100.59   15.40
 -10  -3  -3   18.00    8.50
 -10  -3  -3   26.00   10.40
  10   3   3   22.20    8.80
 -11  -3  -3   69.39   15.80
  11   3   3   24.70   15.70
 -12  -3  -3  303.27   28.70
  12   3   3  307.77   28.60
  12   3   3  310.97   28.20
  13   3   3    5.70   12.70
  13   3   3   45.50   15.60
  13   3   3   37.40   15.20
  15  -4  -3  157.48   23.90
  14  -4  -3   73.49   16.50
  14  -4  -3   30.10   11.90
 -14   4   3   51.89   14.50
  13  -4  -3   32.70   11.90
  13  -4  -3   14.70   10.00
 -13   4   3   17.20    9.90
  12  -4  -3    9.00    7.00
  12  -4  -3    8.40    7.90
 -12   4   3   -2.90    8.30
  11  -4  -3  170.18   18.00
  11  -4  -3  166.18   17.20
 -11   4   3  171.38   18.50
  10  -4  -3  -13.60    3.80
  10  -4  -3    3.30    4.30
 -10   4   3    8.50    5.60
   9  -4  -3   73.79   10.60
   9  -4  -3   85.39   11.10
  -9   4   3   86.69   12.40
   8  -4  -3   16.60    5.80
   8  -4  -3    7.50    4.50
  -8   4   3    5.50    4.70
   7  -4  -3    3.60    3.30
   7  -4  -3   -0.80    2.60
  -7   4   3    1.30    3.40
   6  -4  -3   96.69    8.90
   6  -4  -3   95.69    9.30
  -6   4   3  102.19    9.90
   5  -4  -3   58.39    7.60
   5  -4  -3   59.99    6.70
   5  -4  -3   66.99    8.70
   5  -4  -3   56.49    6.70
  -5   4   3   65.29    7.60
   4  -4  -3  121.99    8.30
   4  -4  -3  123.69    9.30
   4  -4  -3  119.59    9.00
  -4   4   3  118.59    8.50
  -4   4   3  128.79    9.10
   3  -4  -3  315.97   13.70
   3  -4  -3  348.17   17.40
  -3   4   3  337.77   13.70
  -3   4   3  322.17   13.00
  -3   4   3  334.27   15.10
   2  -4  -3  157.08    7.70
   2  -4  -3  162.58    7.80
   2  -4  -3  148.79    9.30
  -2   4   3  155.98    7.40
  -2   4   3  153.98    7.70
  -2   4   3  162.08    9.70
   1  -4  -3  241.38    7.70
   1  -4  -3  255.47   12.20
   1  -4  -3  242.08    9.60
  -1   4   3  240.48   11.80
  -1   4   3  244.38    7.80
  -1   4   3  231.58    9.20
   0  -4  -3   44.10    4.00
   0  -4  -3   36.30    4.80
   0   4   3   36.80    4.70
   0   4   3   46.10    2.40
   0   4   3   40.60    3.80
   0   4   3   45.90    2.20
  -1  -4  -3   98.49    7.70
  -1  -4  -3   80.99    6.30
   1   4   3   81.99    7.70
   1   4   3   93.79    4.90
   1   4   3   83.79    6.10
   1   4   3   95.19    4.70
  -2  -4  -3   48.50    5.90
  -2  -4  -3   45.70    6.10
   2   4   3   46.70    4.10
   2   4   3   51.59    6.80
   2   4   3   64.09    6.00
   2   4   3   55.19    4.60
  -3  -4  -3  100.09    9.30
  -3  -4  -3   99.89    8.60
   3   4   3   98.59    8.50
   3   4   3  104.19    8.00
   3   4   3  100.49   10.40
   3   4   3   95.79    6.90
  -4  -4  -3   -0.10    2.30
  -4  -4  -3    2.90    3.00
  -4  -4  -3    3.50    3.50
   4   4   3   -1.80    3.30
   4   4   3    6.70    4.30
  -5  -4  -3    0.20    3.80
  -5  -4  -3   -0.30    2.80
  -5  -4  -3    4.70    4.60
   5   4   3   -4.40    8.00
  -6  -4  -3  143.19   14.40
  -6  -4  -3  131.39   14.10
  -6  -4  -3  142.89   12.60
  -7  -4  -3   29.70    8.50
  -7  -4  -3   67.19   10.00
  -7  -4  -3   64.39   11.90
  -8  -4  -3   -0.20    6.10
  -8  -4  -3    6.50    6.10
  -8  -4  -3   14.30    8.70
  -9  -4  -3   17.30    8.80
  -9  -4  -3   18.60    9.70
   9   4   3   10.60    7.20
  10   4   3  112.09   17.00
  10   4   3   96.09   15.90
  11   4   3   10.80   10.10
  11   4   3   10.60   11.00
  12   4   3  106.69   22.00
  12   4   3  101.69   19.70
 -16   5   3   16.80   24.40
  15  -5  -3   67.09   21.70
  15  -5  -3   49.10   14.50
 -15   5   3   58.89   18.90
  14  -5  -3    9.30   10.30
  14  -5  -3    3.30    9.20
 -14   5   3   -5.60    9.20
  13  -5  -3    6.10    8.70
  13  -5  -3   21.10    9.10
 -13   5   3   18.10    9.10
  12  -5  -3   -0.60    5.80
  12  -5  -3    4.70    6.50
 -12   5   3    5.50    8.00
  11  -5  -3   25.10    9.30
  11  -5  -3   20.40    8.80
 -11   5   3   17.30    9.00
  10  -5  -3  565.64   30.20
  10  -5  -3  604.94   31.00
 -10   5   3  626.34   34.30
   9  -5  -3  253.07   18.30
   9  -5  -3  263.37   19.20
  -9   5   3  311.07   22.00
   8  -5  -3  243.78   16.80
  -8   5   3  264.57   19.20
   7  -5  -3  104.89   11.00
   7  -5  -3  125.49   10.80
  -7   5   3  130.59   12.20
   6  -5  -3 2399.56   65.29
   6  -5  -3 2510.85   68.69
  -6   5   3 2541.75   68.99
   5  -5  -3  147.39   12.00
   5  -5  -3  156.48   10.30
   5  -5  -3  134.39   11.50
   5  -5  -3  136.59   10.90
  -5   5   3  149.79   11.20
   4  -5  -3    4.70    2.40
   4  -5  -3    8.10    3.30
   4  -5  -3    9.20    2.20
  -4   5   3   13.20    4.00
  -4   5   3    5.30    3.50
  -4   5   3   15.10    3.40
   3  -5  -3 1615.34   45.60
   3  -5  -3 1597.84   43.00
  -3   5   3 1610.24   41.20
  -3   5   3 1636.04   45.80
  -3   5   3 1635.54   42.40
   2  -5  -3 3210.28   78.69
   2  -5  -3 3219.68   73.19
   2  -5  -3 3285.87   73.29
  -2   5   3 3209.98   72.89
  -2   5   3 3169.18   78.69
  -2   5   3 3264.47   72.99
   1  -5  -3  685.63   19.70
   1  -5  -3  707.13   24.20
  -1   5   3  640.84   23.50
  -1   5   3  653.83   17.70
  -1   5   3  686.33   19.20
   0  -5  -3  135.09    7.60
   0  -5  -3  135.69    9.70
   0   5   3  144.19    5.70
   0   5   3  147.49    7.40
   0   5   3  149.29   13.60
   0   5   3  150.08    5.40
  -1  -5  -3  488.55   20.30
  -1  -5  -3  478.35   17.20
   1   5   3  474.75   16.30
   1   5   3  467.75   14.20
   1   5   3  462.95   14.10
   1   5   3  461.45   19.40
  -2  -5  -3 2008.20   55.59
  -2  -5  -3 1991.70   52.39
   2   5   3 2002.10   51.09
   2   5   3 2026.80   48.20
   2   5   3 1958.10   48.70
  -3  -5  -3 1466.35   43.20
  -3  -5  -3 1433.36   45.00
   3   5   3 1332.27   43.80
   3   5   3 1436.86   38.40
   3   5   3 1403.66   39.30
  -4  -5  -3   -0.20    3.20
  -4  -5  -3   -0.50    3.20
   4   5   3    5.40    4.60
   4   5   3    0.30    4.00
   4   5   3    6.70    3.30
  -5  -5  -3  108.59   11.60
  -5  -5  -3  104.89   12.20
   5   5   3  110.39    9.70
  -6  -5  -3  524.45   27.80
  -6  -5  -3  493.35   27.80
   6   5   3  493.55   23.20
  -7  -5  -3  281.27   21.90
  -7  -5  -3  295.17   23.00
   7   5   3  301.77   19.00
  -8  -5  -3    0.40    6.40
  -8  -5  -3   -0.30    6.10
   8   5   3    5.30    6.30
   9   5   3   51.99   12.30
   9   5   3   55.09   13.30
  10   5   3   46.40   12.40
  10   5   3   34.30   12.00
  11   5   3   58.99   14.80
  11   5   3   74.59   15.60
  12   5   3    0.00   13.10
 -16   6   3    1.10   15.00
  15  -6  -3   22.30   13.10
 -15   6   3   27.40   15.00
  14  -6  -3   52.69   14.50
  14  -6  -3   54.19   13.80
 -14   6   3   76.09   17.10
  13  -6  -3   -6.40    7.60
  13  -6  -3   -7.10    7.70
 -13   6   3   12.50    9.90
  12  -6  -3  -15.00    5.60
  12  -6  -3   -3.90    5.90
 -12   6   3   -3.20    8.80
  11  -6  -3   50.59   12.30
  11  -6  -3   62.59   13.10
 -11   6   3   47.60   12.30
  10  -6  -3  246.38   19.50
  10  -6  -3  181.68   17.10
 -10   6   3  208.08   20.10
   9  -6  -3   71.79   10.90
   9  -6  -3   73.49   10.20
  -9   6   3   77.09   12.80
   8  -6  -3   90.69   10.00
   8  -6  -3   64.69    9.40
  -8   6   3   71.19   10.60
   7  -6  -3    6.10    3.30
   7  -6  -3   14.00    4.20
  -7   6   3   10.80    5.00
   6  -6  -3  214.88   14.60
   6  -6  -3  223.68   13.60
  -6   6   3  192.28   14.20
   5  -6  -3  304.27   17.10
   5  -6  -3  280.87   16.40
   5  -6  -3  265.17   15.80
   5  -6  -3  277.87   14.10
  -5   6   3  299.27   16.30
   4  -6  -3    4.00    3.80
   4  -6  -3    4.50    2.40
   4  -6  -3    1.10    1.90
  -4   6   3    2.40    2.30
  -4   6   3    1.90    3.00
   3  -6  -3   79.59    7.40
   3  -6  -3   71.09    8.10
  -3   6   3   80.89    6.70
  -3   6   3   89.69    6.60
   2  -6  -3   52.69    6.90
   2  -6  -3   51.09    4.70
   2  -6  -3   63.29    5.40
  -2   6   3   59.39    5.00
  -2   6   3   59.29    4.80
   1  -6  -3   27.60    2.90
   1  -6  -3   21.80    3.60
   1  -6  -3   28.80    6.30
  -1   6   3   25.40    3.40
  -1   6   3   34.30    6.30
  -1   6   3   25.50    3.20
   0  -6  -3   77.19    5.90
   0  -6  -3   88.59    8.50
   0   6   3   83.29    4.90
   0   6   3   88.59    5.00
   0   6   3   89.89    5.60
  -1  -6  -3  214.38   13.60
  -1  -6  -3  193.98   10.40
   1   6   3  200.98    8.60
   1   6   3  206.38    8.90
   1   6   3  210.98    9.90
  -2  -6  -3  146.89   10.30
  -2  -6  -3  152.88   11.70
   2   6   3  152.48    9.50
   2   6   3  138.69    8.40
   2   6   3  153.68    8.40
  -3  -6  -3   65.89    8.70
  -3  -6  -3   47.90    7.20
   3   6   3   50.79    6.20
   3   6   3   42.70    7.90
   3   6   3   54.29    6.70
  -4  -6  -3   77.89   10.60
  -4  -6  -3   81.69   10.10
   4   6   3   88.09    8.50
  -5  -6  -3  120.09   13.10
  -5  -6  -3  116.39   12.00
   5   6   3  111.59   10.60
  -6  -6  -3    3.90    4.90
  -6  -6  -3    1.40    6.30
   6   6   3   -1.10    4.70
  -7  -6  -3   80.19   14.40
  -7  -6  -3   81.59   14.90
   7   6   3   88.99   13.00
  -8  -6  -3   17.20    9.70
  -8  -6  -3   19.50    9.50
   8   6   3   11.00    8.10
   8   6   3   14.40    7.60
   9   6   3   46.40   12.40
   9   6   3   51.39   12.70
  10   6   3   36.10   13.00
  11   6   3  124.59   24.20
  11   6   3  140.19   23.50
  15  -7  -3    0.60   10.70
 -15   7   3   -0.40   10.90
  14  -7  -3    2.40   10.90
  14  -7  -3   33.80   12.30
 -14   7   3   29.30   14.10
  13  -7  -3   78.49   16.10
  13  -7  -3   97.19   18.10
 -13   7   3  105.49   18.20
  12  -7  -3  160.88   18.80
  12  -7  -3  167.18   18.90
 -12   7   3  135.49   19.40
  11  -7  -3   65.89   12.60
  11  -7  -3   78.89   13.00
 -11   7   3   71.29   13.40
  10  -7  -3  122.79   14.30
  10  -7  -3  110.39   13.30
 -10   7   3   86.09   13.80
   9  -7  -3  385.76   24.60
   9  -7  -3  414.36   23.30
  -9   7   3  402.46   25.90
   8  -7  -3  702.33   32.60
   8  -7  -3  794.62   31.60
  -8   7   3  735.53   33.70
   7  -7  -3  367.76   21.70
   7  -7  -3  371.56   19.20
  -7   7   3  343.37   20.70
   6  -7  -3  209.78   15.50
   6  -7  -3  219.78   13.40
  -6   7   3  239.18   16.10
   5  -7  -3  515.45   23.20
   5  -7  -3  563.64   21.40
   5  -7  -3  558.84   24.70
   5  -7  -3  607.74   26.10
  -5   7   3  603.04   24.60
   4  -7  -3 1062.49   34.40
   4  -7  -3 1035.50   33.40
   4  -7  -3 1083.79   37.30
   4  -7  -3 1053.39   30.80
  -4   7   3 1086.79   33.70
   3  -7  -3  335.77   15.00
   3  -7  -3  338.57   17.90
   3  -7  -3  325.67   14.80
  -3   7   3  322.97   13.10
   2  -7  -3   89.39    6.00
   2  -7  -3   93.79    6.20
   2  -7  -3   64.89    8.00
  -2   7   3   77.29    6.10
  -2   7   3   85.99    5.80
   1  -7  -3  402.76   12.50
   1  -7  -3  443.56   14.60
   1  -7  -3  428.86   20.50
  -1   7   3  424.16   13.70
  -1   7   3  421.86   13.90
   0  -7  -3  305.47   11.90
   0  -7  -3  264.37   15.70
   0   7   3  276.07    9.80
   0   7   3  289.67   10.50
   0   7   3  267.37   10.60
  -1  -7  -3  377.56   19.50
  -1  -7  -3  373.06   15.00
   1   7   3  365.16   13.30
   1   7   3  333.97   13.50
   1   7   3  376.86   12.80
  -2  -7  -3    0.40    3.30
  -2  -7  -3    8.70    3.80
   2   7   3    9.80    4.00
   2   7   3    2.90    3.20
   2   7   3    5.60    3.40
  -3  -7  -3  550.24   23.20
  -3  -7  -3  587.24   27.10
   3   7   3  550.04   24.40
   3   7   3  544.95   21.30
   3   7   3  554.94   20.70
  -4  -7  -3   60.99    9.90
  -4  -7  -3   57.69    9.20
   4   7   3   53.99   12.00
   4   7   3   44.40    7.40
  -5  -7  -3  181.18   14.90
  -5  -7  -3  164.58   16.40
   5   7   3  177.68   14.00
  -6  -7  -3  112.89   14.90
  -6  -7  -3  100.49   14.30
   6   7   3  108.19   12.80
  -7  -7  -3   -2.50    7.10
   7   7   3    2.00    8.40
   7   7   3    5.00    7.10
  -8  -7  -3   20.00   10.50
   8   7   3   29.10    9.90
   8   7   3   24.50   10.20
   9   7   3   28.80   12.90
   9   7   3   19.50   10.80
  10   7   3   25.70   12.80
  10   7   3   44.80   14.10
  15  -8  -3  115.59   22.30
  15  -8  -3  170.08   25.50
 -15   8   3   92.09   23.30
  14  -8  -3   -4.90   10.50
  14  -8  -3    4.10    9.30
 -14   8   3  -11.60   10.50
  13  -8  -3   71.49   15.80
  13  -8  -3   68.49   16.90
 -13   8   3  100.99   18.70
  12  -8  -3  242.78   22.40
  12  -8  -3  189.28   23.20
 -12   8   3  167.78   20.60
  11  -8  -3  206.38   19.80
  11  -8  -3  187.38   19.60
 -11   8   3  190.78   20.30
  10  -8  -3   14.80    7.10
  10  -8  -3   11.10    6.30
 -10   8   3    1.40    6.30
   9  -8  -3   52.99    9.90
   9  -8  -3   54.79   10.70
  -9   8   3   41.40   10.90
   8  -8  -3  158.78   13.60
   8  -8  -3  139.99   14.80
  -8   8   3   97.09   17.00
   7  -8  -3  318.47   17.90
   7  -8  -3  334.87   21.10
  -7   8   3  335.07   20.50
   6  -8  -3  204.68   15.50
   6  -8  -3  178.88   12.10
  -6   8   3  184.38   14.30
   5  -8  -3    0.10    4.80
   5  -8  -3    3.20    3.00
   5  -8  -3    0.30    2.70
   5  -8  -3   -3.20    5.10
  -5   8   3    0.90    3.60
   4  -8  -3  104.99    8.10
   4  -8  -3  142.99   11.40
   4  -8  -3  124.79   11.30
   4  -8  -3  119.79    9.70
  -4   8   3  123.59    9.90
   3  -8  -3  140.29    9.50
   3  -8  -3  157.18    8.60
   3  -8  -3  153.28    9.40
   3  -8  -3  154.08   12.60
  -3   8   3  138.29    9.60
   2  -8  -3  140.09    7.20
   2  -8  -3  107.89   10.70
   2  -8  -3  118.19    7.20
  -2   8   3  113.49    6.60
  -2   8   3  127.59    7.80
   1  -8  -3  141.89    6.50
   1  -8  -3  146.39   12.20
   1  -8  -3  140.49    7.30
  -1   8   3  144.29    7.60
  -1   8   3  139.09    6.60
   0  -8  -3   38.90    4.60
   0  -8  -3   33.70    7.20
   0   8   3   43.10    4.50
   0   8   3   40.70    4.10
   0   8   3   44.50    4.60
  -1  -8  -3   41.80    5.90
  -1  -8  -3   29.80    6.80
   1   8   3   39.30    5.20
   1   8   3   41.40    4.90
   1   8   3   43.00    5.20
  -2  -8  -3    7.10    4.40
  -2  -8  -3    4.70    4.90
   2   8   3    4.20    3.80
   2   8   3    8.10    3.80
   2   8   3   14.90    3.80
  -3  -8  -3   14.10    5.80
  -3  -8  -3    8.40    4.60
   3   8   3   18.20    5.30
  -4  -8  -3    9.90    6.10
  -4  -8  -3   10.00    6.60
   4   8   3    0.80    4.60
  -5  -8  -3   44.40   12.10
  -5  -8  -3   40.10    9.50
   5   8   3   41.70    8.70
  -6  -8  -3   -6.00    7.40
   6   8   3   -2.80    6.90
  -7  -8  -3   88.49   17.20
   7   8   3   64.89   12.90
   7   8   3   69.79   14.40
  -8  -8  -3   93.69   30.20
   8   8   3   38.60   11.50
   8   8   3   39.80   12.10
   9   8   3   94.39   15.70
   9   8   3   62.59   14.60
  10   8   3   43.10   17.40
  15  -9  -3   39.60   15.10
  15  -9  -3   41.00   17.70
  14  -9  -3  141.29   22.60
  14  -9  -3  114.39   22.10
 -14   9   3  151.88   22.90
  13  -9  -3  129.49   19.90
  13  -9  -3  153.38   20.80
 -13   9   3  138.39   20.90
  12  -9  -3    7.40    8.40
  12  -9  -3   -0.20    7.40
 -12   9   3   12.70    9.80
  11  -9  -3  272.97   21.50
  11  -9  -3  265.87   24.50
 -11   9   3  273.57   23.60
  10  -9  -3  392.36   24.60
  10  -9  -3  409.76   27.60
 -10   9   3  449.46   29.20
   9  -9  -3  214.28   19.40
   9  -9  -3  215.68   17.00
  -9   9   3  205.48   18.30
   8  -9  -3   34.80    7.60
   8  -9  -3   33.50    8.80
  -8   9   3   37.10    9.20
   7  -9  -3  448.36   25.40
   7  -9  -3  446.46   20.70
  -7   9   3  422.06   23.70
   6  -9  -3  243.08   13.60
   6  -9  -3  224.38   17.40
  -6   9   3  222.88   15.80
   5  -9  -3   58.09   11.20
   5  -9  -3   49.99    6.40
   5  -9  -3   69.59   12.00
   5  -9  -3   51.89    9.50
  -5   9   3   62.99    8.40
   4  -9  -3   14.80    5.70
   4  -9  -3   14.60    6.00
   4  -9  -3    6.30    5.00
   4  -9  -3   13.60    3.50
  -4   9   3   10.50    4.20
   3  -9  -3   45.30    5.00
   3  -9  -3   37.90    6.90
   3  -9  -3   51.79    6.80
  -3   9   3   57.49    6.40
   2  -9  -3   54.19    8.90
   2  -9  -3   42.20    5.50
   2  -9  -3   41.50    4.30
   2  -9  -3   44.00    4.90
  -2   9   3   41.80    5.30
   1  -9  -3   12.90    2.50
   1  -9  -3   18.50    7.50
  -1   9   3   12.70    3.50
  -1   9   3   19.80    3.90
   0  -9  -3   20.90    8.40
   0  -9  -3   19.00    3.70
   0   9   3   20.40    4.00
   0   9   3   21.00    3.90
   0   9   3   26.60    4.20
  -1  -9  -3  300.07   19.10
  -1  -9  -3  268.47   11.20
   1   9   3  253.67   10.60
   1   9   3  265.07   11.00
   1   9   3  267.37   10.30
  -2  -9  -3  616.14   29.50
   2   9   3  628.54   21.40
   2   9   3  560.14   26.60
   2   9   3  599.94   20.20
  -3  -9  -3  184.28   17.10
   3   9   3  164.08   11.20
  -4  -9  -3   28.50    9.60
   4   9   3   29.20    6.40
  -5  -9  -3  112.89   16.90
   5   9   3  127.49   12.40
   5   9   3  135.59   13.70
  -6  -9  -3  343.67   27.90
   6   9   3  280.27   19.70
  -7  -9  -3   85.39   17.60
   7   9   3   87.19   16.50
   7   9   3   74.49   13.70
  -8  -9  -3   23.80   17.90
   8   9   3    3.60   18.10
   8   9   3  -13.60   10.30
  15 -10  -3   -2.70   19.10
  15 -10  -3  -20.40   13.40
 -15  10   3    5.50   20.00
  13 -10  -3   20.70   11.20
  13 -10  -3   72.09   21.80
 -13  10   3   44.10   16.30
  12 -10  -3   24.80   11.40
  12 -10  -3   35.10   11.00
  11 -10  -3    5.30    7.90
  11 -10  -3    6.10    8.40
 -11  10   3    2.30    8.80
  10 -10  -3   -3.40    5.80
  10 -10  -3   -7.70    6.10
 -10  10   3    1.30    8.10
   9 -10  -3   18.40    7.30
   9 -10  -3   18.50    8.80
  -9  10   3    6.70    7.10
   8 -10  -3   15.30    6.50
   8 -10  -3   17.40    8.50
  -8  10   3   12.80    7.40
   7 -10  -3    0.70    4.90
   7 -10  -3    3.80    5.70
  -7  10   3    8.60    6.70
   6 -10  -3   23.60    6.90
   6 -10  -3   40.70    9.50
   6 -10  -3   24.30    5.40
  -6  10   3   25.50    6.90
   5 -10  -3   90.09   11.10
   5 -10  -3  113.19    9.00
   5 -10  -3  120.09   13.50
   5 -10  -3   96.39   12.50
  -5  10   3  109.09   10.80
   4 -10  -3   65.89   14.70
   4 -10  -3   79.79    7.50
   4 -10  -3   75.09    8.20
   4 -10  -3   90.69   10.30
  -4  10   3   79.79    8.50
   3 -10  -3  112.99    6.00
   3 -10  -3  105.19    9.20
   3 -10  -3  131.89   13.30
   3 -10  -3  110.29    6.50
  -3  10   3  114.79    9.20
   2 -10  -3  257.47   10.70
   2 -10  -3  296.37   19.90
  -2  10   3  274.77   11.70
   1 -10  -3   56.99    9.30
  -1  10   3   51.49    4.90
  -1  10   3   62.19    4.90
   0 -10  -3   99.39   12.30
   0  10   3   75.29    4.70
  -1 -10  -3   22.30    8.00
  -2 -10  -3   51.59   11.10
   2  10   3   63.39    6.10
   2  10   3   36.50    5.40
  -3 -10  -3    2.70    6.50
   3  10   3    3.60    4.10
  -4 -10  -3   45.40   11.90
  -5 -10  -3   -8.60    8.80
   5  10   3   -4.70    7.30
   5  10   3    8.60    6.30
  -6 -10  -3   52.29   14.60
   6  10   3   48.40   11.00
  -8 -10  -3   36.80   19.50
  14 -11  -3  -38.30   11.30
 -14  11   3    5.10   13.50
  13 -11  -3    8.30   11.50
  13 -11  -3   37.70   13.90
 -13  11   3   23.10   13.30
  12 -11  -3   97.49   15.80
  12 -11  -3   35.40   11.90
 -12  11   3   64.19   17.10
  11 -11  -3   20.70    9.60
  11 -11  -3   29.70   11.40
 -11  11   3   10.10   11.70
  10 -11  -3    3.70    7.20
  10 -11  -3   -3.80    7.60
 -10  11   3  -10.60    7.60
   9 -11  -3   62.49   11.80
   9 -11  -3   85.49   14.90
  -9  11   3  101.59   14.80
   8 -11  -3  240.48   16.70
   8 -11  -3  268.17   22.20
  -8  11   3  257.47   19.60
   7 -11  -3   94.89   10.40
   7 -11  -3   81.89   14.20
  -7  11   3  101.09   13.20
   6 -11  -3   85.09   13.70
   6 -11  -3   54.69   10.80
   6 -11  -3   52.19    8.10
  -6  11   3   53.39   10.70
   5 -11  -3    1.50    9.40
   5 -11  -3    3.00    5.50
   5 -11  -3   -4.60    5.50
   5 -11  -3    2.30    4.00
  -5  11   3    6.00    5.30
   4 -11  -3   15.30    3.30
   4 -11  -3   25.80    7.20
  -4  11   3   15.00    5.70
   3 -11  -3   -0.20    5.10
   3 -11  -3    4.20    4.80
  -3  11   3    3.30    3.80
   2 -11  -3    3.70    5.00
  -2  11   3   20.40    4.10
   1 -11  -3   26.10    7.90
   0 -11  -3  209.58   18.10
  -1 -11  -3  181.78   17.30
  -2 -11  -3   24.20   10.00
  -3 -11  -3   57.99   13.50
  -4 -11  -3  210.58   22.40
  -6 -11  -3   17.10   14.40
  14 -12  -3    1.70   13.20
 -14  12   3    1.80   15.40
  13 -12  -3   15.60   11.60
 -13  12   3    3.60   13.60
  12 -12  -3   -8.10    9.30
  12 -12  -3    2.90   10.70
 -12  12   3    1.70   12.40
  11 -12  -3   16.60    9.20
  11 -12  -3   15.20   11.30
 -11  12   3   13.80   12.30
  10 -12  -3    7.00   10.20
  10 -12  -3   -2.70    7.90
 -10  12   3   -7.50    9.50
   9 -12  -3    0.50    7.00
   9 -12  -3    1.90    7.70
  -9  12   3   22.50    9.60
   8 -12  -3   -1.40    6.00
   8 -12  -3   -6.90    6.80
  -8  12   3   -2.30    8.10
   7 -12  -3   53.59    8.70
   7 -12  -3   49.60   11.60
  -7  12   3   35.80    8.90
   6 -12  -3   -2.30    4.70
   6 -12  -3   -2.10    9.00
   6 -12  -3    0.00    5.80
  -6  12   3    1.80    6.60
   5 -12  -3    5.60   11.30
   5 -12  -3   12.30    4.30
   5 -12  -3   16.20    8.40
  -5  12   3    8.90    6.30
   4 -12  -3   84.59   13.80
   4 -12  -3   53.39    9.20
   3 -12  -3    8.30    6.70
   3 -12  -3    2.00    4.90
  -3  12   3    7.30    5.80
   2 -12  -3   10.50    7.30
   1 -12  -3   16.60    8.10
   0 -12  -3   79.09   13.80
  -1 -12  -3   58.79   12.80
  -2 -12  -3   36.10   11.20
  -3 -12  -3   75.99   17.30
  -4 -12  -3   18.90   12.60
  -5 -12  -3   41.50   17.40
  13 -13  -3   -1.80   13.40
 -13  13   3  -29.10   14.20
  12 -13  -3    5.50   12.10
 -12  13   3    9.00   13.70
  11 -13  -3   51.29   13.80
 -11  13   3   17.10   14.60
  10 -13  -3  103.19   20.00
 -10  13   3  114.09   20.40
   9 -13  -3   63.09   14.90
  -9  13   3   41.70   13.30
   8 -13  -3   -7.50    7.80
   8 -13  -3   13.40   10.00
  -8  13   3   17.40    9.10
   7 -13  -3  124.19   11.60
  -7  13   3  120.29   17.20
   6 -13  -3  285.37   24.10
  -6  13   3  259.57   18.00
   5 -13  -3  117.99   16.70
   4 -13  -3   20.10   10.00
  -4  13   3   34.00    7.40
   3 -13  -3  158.78   17.90
   2 -13  -3  563.84   32.60
   1 -13  -3  212.58   21.30
   0 -13  -3   23.70   10.50
  -1 -13  -3  123.29   20.40
  -2 -13  -3  224.18   25.40
  -3 -13  -3   50.09   17.20
  -4 -13  -3  -21.90   15.10
  12 -14  -3  -11.00   15.70
 -12  14   3  -16.20   19.10
  11 -14  -3    6.20   14.20
 -11  14   3   -1.60   13.50
  10 -14  -3    0.20   10.70
  10 -14  -3    4.70   13.40
 -10  14   3   18.80   12.70
   9 -14  -3   24.90   11.40
  -9  14   3    7.20   11.10
   8 -14  -3    9.80   10.80
  -8  14   3   14.70   10.90
   7 -14  -3    9.20   10.40
  -7  14   3    3.00   11.50
   6 -14  -3   39.60   12.20
  -6  14   3   11.70    9.10
   5 -14  -3   15.90    9.70
   4 -14  -3   27.50   10.70
   3 -14  -3   -9.70    9.00
   2 -14  -3   37.10   12.10
   1 -14  -3   11.40   10.80
   0 -14  -3    1.00   11.30
  -1 -14  -3   31.90   14.10
  -2 -14  -3  -18.30   15.00
   9 -15  -3  112.89   22.10
   8 -15  -3  125.19   22.70
   6 -15  -3   -0.70   12.00
   5 -15  -3   38.30   12.70
   4 -15  -3   50.19   14.70
   3 -15  -3   61.09   15.50
   2 -15  -3  -12.40   16.80
   0 -15  -3  101.49   21.40
   7 -16  -3   17.40   13.80
   6 -16  -3   17.20   13.50
   5 -16  -3   14.30   13.20
   4 -16  -3   10.80   14.10
   2 -16   4    3.10   15.70
   3 -16   4   49.50   15.10
   4 -16   4  121.09   21.10
  -5  16  -4   37.90   16.30
  -6  16  -4   11.40   14.60
   6 -16   4   11.40   11.20
  -7  16  -4  116.39   23.10
   7 -16   4  110.39   20.70
  -8  16  -4   94.09   19.80
  -9  16  -4    7.10   17.60
   9 -16   4   23.40   13.00
   0 -15   4   21.10   14.20
   1 -15   4   55.29   13.70
  -2  15  -4    1.70   12.90
   2 -15   4    8.00   10.50
  -3  15  -4   49.90   14.50
   3 -15   4   69.29   13.20
  -4  15  -4   64.49   14.90
  -5  15  -4  107.39   20.40
  -6  15  -4    1.10   12.30
   6 -15   4   -7.50    9.50
  -7  15  -4   59.79   15.60
   7 -15   4   54.99   14.30
  -8  15  -4   12.20   14.80
   8 -15   4    5.60   10.50
  -9  15  -4   16.20   15.00
   9 -15   4   30.70   13.20
 -10  15  -4  -21.40   14.40
  10 -15   4   23.40   13.40
 -11  15  -4   17.30   17.00
  11 -15   4    6.30   12.00
  -2 -14   4   17.40   14.70
   1  14  -4  -21.30   11.50
  -1 -14   4  -10.70   10.40
   0  14  -4    4.90   10.60
  -1  14  -4   -2.20    9.40
   1 -14   4    9.50    9.20
  -2  14  -4  -18.00    9.40
   2 -14   4    0.70    7.30
  -3  14  -4   16.80   10.60
   3 -14   4   10.60    8.50
  -4  14  -4   17.20   10.20
   4 -14   4    2.80    6.90
  -5  14  -4   17.30   10.30
   5 -14   4   14.30    9.10
  -6  14  -4   86.99   17.80
   6 -14   4   69.09   13.70
  -7  14  -4   71.09   16.40
   7 -14   4   61.99   13.60
  -8  14  -4   -3.30   11.30
   8 -14   4  -10.60   16.60
  -9  14  -4   72.99   20.10
   9 -14   4   66.19   14.60
   9 -14   4   48.50   13.40
 -10  14  -4  148.39   24.70
  10 -14   4  137.49   18.10
 -11  14  -4   89.99   20.40
  11 -14   4   51.19   14.90
  11 -14   4   52.89   15.90
 -12  14  -4  -31.40   13.90
  12 -14   4  -34.00   14.00
  12 -14   4    5.00   11.70
   4  13  -4   56.69   22.30
  -4 -13   4   50.69   17.80
   3  13  -4   70.69   16.60
  -3 -13   4   83.09   15.20
   2  13  -4  100.79   18.70
   1  13  -4   42.30   13.00
  -1 -13   4   31.80   10.70
   0  13  -4   13.30   10.40
   0 -13   4   26.00    8.30
  -1  13  -4   62.79   19.00
   1 -13   4   59.69   11.30
  -2  13  -4   77.29   13.90
   2 -13   4   88.99   13.10
  -3  13  -4   15.10    9.20
   3 -13   4   10.60    8.00
  -4  13  -4   34.60   11.20
   4 -13   4   44.20    9.50
  -5  13  -4   13.20    8.80
   5 -13   4    6.20    6.70
  -6  13  -4   81.59   15.70
   6 -13   4  107.59   14.70
  -7  13  -4   49.40   13.10
   7 -13   4   53.29    6.80
   7 -13   4   63.59   12.90
  -8  13  -4   27.10   12.00
   8 -13   4   43.80   12.00
  -9  13  -4   -4.30   10.60
   9 -13   4   -4.80    8.40
 -10  13  -4   39.90   15.90
  10 -13   4   47.40   12.90
 -11  13  -4    6.70   12.20
  11 -13   4   15.10   10.00
  11 -13   4   11.80   10.40
 -12  13  -4  -22.90   14.60
  12 -13   4    9.80   12.30
  12 -13   4   -6.90   10.10
 -13  13  -4   24.20   25.80
  13 -13   4  -25.30   13.40
   6  12  -4    0.50   17.10
   5  12  -4   20.40   13.70
  -5 -12   4   33.40   13.80
   4  12  -4   78.79   16.20
   3  12  -4  125.39   18.30
   2  12  -4    6.30    9.40
   1  12  -4   84.29   15.50
  -1 -12   4   96.49   20.40
   0  12  -4  362.76   23.10
   0 -12   4  284.57   19.00
  -1  12  -4  178.78   17.90
   1 -12   4  194.78   15.40
  -2  12  -4    0.50    6.80
   2 -12   4    0.50    7.90
  -3  12  -4  337.57   22.40
   3 -12   4  316.87   19.90
  -4  12  -4  581.14   31.50
   4 -12   4  571.24   27.70
  -5  12  -4  160.58   17.50
   5 -12   4  184.18   15.80
  -6  12  -4   11.40    8.10
   6 -12   4    6.30    3.30
   6 -12   4    3.20    5.80
  -7  12  -4  200.18   20.60
   7 -12   4  197.18   11.90
   7 -12   4  217.08   16.80
   7 -12   4  230.78   19.00
  -8  12  -4  262.07   24.60
   8 -12   4  232.68   20.40
   8 -12   4  263.07   15.90
  -9  12  -4  163.48   20.70
   9 -12   4  165.48   17.30
   9 -12   4  169.18   18.70
 -10  12  -4  -15.50    9.00
 -11  12  -4   71.59   17.90
  11 -12   4   27.20   10.00
  11 -12   4   73.39   15.20
 -12  12  -4   91.99   20.90
  12 -12   4   80.49   14.70
  12 -12   4   42.30   14.30
 -13  12  -4   54.89   19.30
 -14  12  -4   42.00   24.20
  14 -12   4   -0.40   13.20
   7  11  -4   16.40   16.70
   6  11  -4   71.49   16.80
   5  11  -4   14.10   11.20
   4  11  -4  225.78   22.00
   3  11  -4  172.38   17.90
   2  11  -4   36.20   10.00
  -2 -11   4   18.00    7.70
   1  11  -4    9.50    7.30
  -1 -11   4    6.80    5.30
   0  11  -4  156.28   16.20
   0 -11   4  129.29   12.50
  -1  11  -4   83.39   12.50
   1 -11   4   62.89    9.10
  -2  11  -4    6.00    7.30
   2 -11   4    2.10    4.30
  -3  11  -4   97.39   13.90
   3 -11   4  109.99   11.90
  -4  11  -4   32.80    9.90
   4 -11   4   35.60    8.70
  -5  11  -4    8.20    7.40
   5 -11   4   -3.30    4.60
   5 -11   4    8.20    3.10
   5 -11   4    5.10    2.30
  -6  11  -4   49.10   11.40
   6 -11   4   21.30    6.90
   6 -11   4   29.70    5.60
   6 -11   4    7.60    5.70
  -7  11  -4   70.29   13.10
   7 -11   4   45.80    9.60
   7 -11   4   60.29    8.60
  -8  11  -4   49.99   12.60
   8 -11   4   50.89    9.30
   8 -11   4   44.20   10.10
  -9  11  -4    4.50    7.40
   9 -11   4   -3.10    5.90
   9 -11   4    9.60    6.10
 -10  11  -4    7.60   11.10
  10 -11   4    3.50    7.60
  10 -11   4    5.30    7.70
 -11  11  -4    8.60   12.10
  11 -11   4   27.20   11.10
  11 -11   4   13.90   10.10
 -12  11  -4   21.20   13.00
  12 -11   4   23.90   10.10
  12 -11   4   10.50    9.30
 -13  11  -4   -2.80   12.10
  13 -11   4   -4.80   10.30
  14 -11   4   23.50   13.30
  14 -11   4    3.20   14.20
   7  10  -4   23.80   13.10
   6  10  -4   48.50    8.30
   6  10  -4   29.70   12.50
  -6 -10   4   33.20   13.00
   5  10  -4    1.90    4.80
   5  10  -4   22.30   10.60
  -5 -10   4    3.30    8.40
   4  10  -4   -4.70    2.10
   4  10  -4   -2.20    8.40
   3  10  -4   75.69   13.80
  -3 -10   4  104.49   12.20
   2  10  -4  132.19   14.60
  -2 -10   4  147.19   12.60
   1  10  -4   32.70    8.90
  -1 -10   4   35.70    7.00
   0  10  -4    8.20    6.10
   0 -10   4    0.20    4.00
  -1  10  -4  307.67   20.00
   1 -10   4  304.27   16.40
  -2  10  -4  515.05   26.70
   2 -10   4  541.95   23.20
  -3  10  -4   99.79   12.90
   3 -10   4  105.89   10.70
  -4  10  -4   19.40    7.30
   4 -10   4   22.70    6.00
  -5  10  -4  797.22   36.60
   5 -10   4  840.32   33.20
   5 -10   4  798.72   24.80
  -6  10  -4  381.66   24.80
   6 -10   4  351.66   18.00
   6 -10   4  378.56   16.40
   6 -10   4  392.66   22.20
  -7  10  -4   53.89   12.50
   7 -10   4   50.49   11.10
   7 -10   4   37.90    6.80
  -8  10  -4   23.50    9.10
   8 -10   4    5.00    4.50
   8 -10   4    5.00    5.60
  -9  10  -4  234.68   21.10
   9 -10   4  218.88   16.80
   9 -10   4  211.48   19.20
 -10  10  -4   62.59   13.60
  10 -10   4   58.49   11.80
  10 -10   4   82.09   14.10
 -11  10  -4   23.80   13.00
  11 -10   4   49.40   12.20
  11 -10   4   51.99   12.60
 -12  10  -4    0.60   10.60
  12 -10   4   11.40    9.20
  12 -10   4   16.80   11.00
 -13  10  -4   57.39   16.70
  13 -10   4   56.39   15.20
 -14  10  -4   46.60   15.70
 -15  10  -4   55.99   20.10
  15 -10   4   27.60   15.30
   9   9  -4   73.99   14.20
   9   9  -4   69.99   18.10
   8   9  -4  220.58   19.90
   7   9  -4   50.39   10.30
   7   9  -4   22.50   11.50
   6   9  -4   90.99   15.80
   6   9  -4   89.39   10.70
   5   9  -4  260.07   21.60
  -5  -9   4  253.77   19.20
   4   9  -4   16.20    4.30
  -4  -9   4   19.20    6.80
   3   9  -4  102.59   13.50
   3   9  -4  106.79    5.20
  -3  -9   4  108.79   11.00
   2   9  -4  154.98   17.00
   2   9  -4  151.68   14.70
  -2  -9   4  163.08   11.90
   1   9  -4  572.44   26.50
   1   9  -4  470.45   20.70
  -1  -9   4  535.15   21.50
   0   9  -4   63.79    9.60
   0   9  -4   31.30    7.50
   0  -9   4   46.80    7.00
  -1   9  -4    7.30    4.70
  -1   9  -4   14.10    6.20
   1  -9   4   14.70    4.60
  -2   9  -4   14.10    5.80
   2  -9   4   20.10    5.00
  -3   9  -4  206.58   16.40
   3  -9   4  236.78   14.20
  -4   9  -4   35.90    8.90
   4  -9   4   46.00    7.30
   4  -9   4   38.70    4.10
   4  -9   4   35.90    4.70
  -5   9  -4  223.98   17.90
   5  -9   4  216.48   12.30
   5  -9   4  202.58   10.70
   5  -9   4  212.68   15.00
  -6   9  -4   51.89   12.00
   6  -9   4   37.30    8.40
   6  -9   4   39.30    6.30
   6  -9   4   53.59    8.50
  -7   9  -4   51.19   12.00
   7  -9   4   51.79    9.20
   7  -9   4   45.50    7.80
  -8   9  -4    2.90    7.10
   8  -9   4    0.60    5.20
   8  -9   4   -3.90    4.20
  -9   9  -4   56.19   13.80
   9  -9   4   59.69   10.90
   9  -9   4   72.89   10.90
 -10   9  -4   -2.60    6.20
  10  -9   4    3.00    5.90
  10  -9   4    2.10    6.50
 -11   9  -4   76.49   15.60
  11  -9   4   29.20    9.30
  11  -9   4   46.80   11.10
 -12   9  -4   17.00   10.70
  12  -9   4   16.50    9.00
  12  -9   4   40.00   12.10
 -13   9  -4    5.50    9.90
  13  -9   4    9.40    9.50
  13  -9   4   -2.90    8.90
 -14   9  -4   27.10   14.00
  14  -9   4    2.40    9.40
  14  -9   4   21.70   11.70
  15  -9   4    9.80   20.30
  15  -9   4    5.10   14.10
  10   8  -4  -18.60   11.10
  10   8  -4   30.60   16.80
   9   8  -4   43.80   12.90
   9   8  -4   46.40   15.60
   8   8  -4   87.29   18.10
   8   8  -4  130.09   15.60
   7   8  -4    3.60    7.10
   7   8  -4   18.10    8.90
   6   8  -4  144.69   12.60
   6   8  -4  137.09   16.80
  -6  -8   4  149.29   15.90
   5   8  -4  533.85   28.90
   5   8  -4  540.65   21.30
  -5  -8   4  502.65   25.40
   4   8  -4  360.46   22.40
   4   8  -4  424.26   16.20
  -4  -8   4  380.76   19.90
   3   8  -4    1.60    4.60
   3   8  -4   13.00    6.10
   3   8  -4    7.00    3.50
   3   8  -4    8.90    3.10
  -3  -8   4    2.20    3.50
   2   8  -4  110.69    4.30
   2   8  -4   98.49   11.20
   2   8  -4  106.09    4.00
   2   8  -4   94.79    8.50
  -2  -8   4  110.89    9.10
   1   8  -4  297.57   18.50
   1   8  -4  332.07   19.10
  -1  -8   4  341.77   15.20
   0   8  -4  100.09   11.00
   0  -8   4   90.89    7.80
   0  -8   4   94.29    9.70
  -1   8  -4   28.90    5.70
  -1   8  -4   28.40    7.30
   1  -8   4   26.90    6.10
   1  -8   4   28.00    4.90
  -2   8  -4  159.28   13.00
  -2   8  -4  149.79   10.50
   2  -8   4  142.09   10.20
   2  -8   4  139.49   12.50
  -3   8  -4  247.38   14.00
  -3   8  -4  260.67   17.40
   3  -8   4  266.07    8.90
   3  -8   4  236.38   13.80
   3  -8   4  243.68    8.30
  -4   8  -4  314.97   19.60
   4  -8   4  300.87   16.30
   4  -8   4  295.77   12.10
   4  -8   4  306.07   13.10
  -5   8  -4   47.50   10.40
   5  -8   4   23.30    5.70
   5  -8   4   30.90    6.20
   5  -8   4   34.60    5.00
  -6   8  -4   37.40    9.90
   6  -8   4   24.70    6.70
   6  -8   4   29.20    5.60
   6  -8   4   23.10    6.30
  -7   8  -4   15.20    6.90
   7  -8   4   17.10    5.80
   7  -8   4   21.50    5.80
  -8   8  -4  385.46   26.30
   8  -8   4  373.96   23.30
   8  -8   4  415.96   22.00
  -9   8  -4   59.79   13.70
   9  -8   4   72.89   10.40
   9  -8   4   43.30   10.20
 -10   8  -4   -1.20    6.80
  10  -8   4   -2.20    5.60
  10  -8   4    3.80    6.30
 -11   8  -4  127.49   18.30
  11  -8   4   77.49   15.00
  11  -8   4   84.89   14.40
 -12   8  -4  360.96   33.30
  12  -8   4  344.27   27.90
  12  -8   4  367.66   26.80
 -13   8  -4   50.09   15.30
  13  -8   4   39.70   12.00
  13  -8   4   40.00   13.00
 -14   8  -4  -14.10   11.30
  14  -8   4    0.90   11.50
 -15   8  -4   26.00   15.80
  15  -8   4   -0.40   12.40
  11   7  -4   86.49   19.80
  10   7  -4   89.79   18.20
  10   7  -4  100.59   17.60
   9   7  -4   39.30   10.90
   9   7  -4   30.70   13.20
   8   7  -4   22.20   11.50
   8   7  -4   11.50    6.90
   7   7  -4  224.38   17.10
   7   7  -4  247.58   20.70
   6   7  -4  317.37   21.80
   6   7  -4  299.27   17.20
   5   7  -4  110.39   10.00
   5   7  -4  145.79   15.30
  -5  -7   4  138.09   12.80
   4   7  -4  177.18   15.10
   4   7  -4  177.38   11.90
   4   7  -4  189.28   10.90
   4   7  -4  168.28   11.90
  -4  -7   4  182.48   12.90
   3   7  -4  188.68   13.30
   3   7  -4  221.28   11.50
   3   7  -4  237.88   16.20
  -3  -7   4  229.28   13.30
   2   7  -4  115.89    8.30
   2   7  -4  112.99    6.50
   2   7  -4  130.29   11.80
   2   7  -4  118.89    6.00
  -2  -7   4  137.69    9.40
   1   7  -4   90.89    7.40
   1   7  -4   88.59    9.50
  -1  -7   4   84.49    9.00
  -1  -7   4   92.09    7.20
   0   7  -4   85.79    6.80
   0   7  -4   82.49    9.10
   0  -7   4  100.09    9.30
   0  -7   4   96.79    7.00
  -1   7  -4    1.00    2.40
  -1   7  -4    2.70    3.60
   1  -7   4    2.20    2.00
   1  -7   4    0.10    3.50
  -2   7  -4  120.29    8.70
  -2   7  -4  132.19   11.50
   2  -7   4  126.89    8.80
   2  -7   4  127.09    3.90
   2  -7   4  127.99    3.90
   2  -7   4  106.89   10.50
  -3   7  -4   10.30    3.30
  -3   7  -4    5.30    4.00
   3  -7   4    7.60    5.20
   3  -7   4   -0.80    2.10
   3  -7   4    1.90    1.90
   3  -7   4    3.80    1.90
  -4   7  -4  265.67   13.50
  -4   7  -4  300.17   18.50
   4  -7   4  272.37   13.10
   4  -7   4  287.47   15.20
  -5   7  -4   69.29    9.70
  -5   7  -4   61.59    7.70
   5  -7   4   57.69    7.40
  -6   7  -4  130.29   11.60
  -6   7  -4  143.79   13.70
   6  -7   4  109.69   10.90
   6  -7   4  101.39   10.70
  -7   7  -4    0.90    3.60
  -7   7  -4   -2.30    3.90
   7  -7   4    3.40    3.50
  -8   7  -4  220.28   19.30
  -8   7  -4  231.18   18.60
   8  -7   4  259.07   18.30
  -9   7  -4   61.09   12.40
  -9   7  -4   53.29   11.60
   9  -7   4   55.39   10.40
   9  -7   4   61.99   10.30
 -10   7  -4    8.40    7.90
  10  -7   4    1.20    5.80
  10  -7   4   -0.60    4.70
 -11   7  -4   24.30   10.20
  11  -7   4   14.60    7.00
  11  -7   4   24.00    8.80
 -12   7  -4    9.80    9.00
  12  -7   4   -2.50    7.30
  12  -7   4  -14.20    7.00
 -13   7  -4    2.10    9.80
  13  -7   4    2.10    8.40
  13  -7   4    4.90    9.20
 -14   7  -4   -7.30   12.40
  14  -7   4  -14.20    9.60
  15  -7   4   -2.80   11.40
  12   6  -4   16.80   15.80
  12   6  -4   23.40   14.10
  12   6  -4   40.20   14.90
  11   6  -4   39.80   12.20
  11   6  -4   52.69   15.10
  10   6  -4   43.40   11.90
  10   6  -4   54.29   15.80
   9   6  -4    3.00    8.00
   9   6  -4   -4.90    6.60
   8   6  -4   60.29   10.80
   8   6  -4   56.69   12.90
   7   6  -4  267.47   17.40
   7   6  -4  299.97   21.20
   6   6  -4  428.16   21.00
   6   6  -4  463.25   25.50
   5   6  -4   51.99    9.40
   5   6  -4   50.49    7.00
  -5  -6   4   50.99    7.90
   4   6  -4    9.00    4.80
   4   6  -4    2.70    4.00
   4   6  -4    5.90    3.80
   4   6  -4    4.10    2.90
  -4  -6   4    5.90    3.80
   3   6  -4  110.39   10.60
   3   6  -4  100.49    7.00
   3   6  -4   97.79    8.10
   3   6  -4  101.39    7.60
  -3  -6   4  106.89    8.20
   2   6  -4 1420.76   35.40
   2   6  -4 1388.86   37.70
   2   6  -4 1569.54   45.60
   2   6  -4 1456.15   36.90
  -2  -6   4 1453.15   41.80
  -2  -6   4 1472.55   39.00
   1   6  -4  828.72   23.70
   1   6  -4  824.72   29.80
   1   6  -4  818.42   20.00
   1   6  -4  817.42   19.50
  -1  -6   4  777.52   27.00
  -1  -6   4  820.52   24.00
   0   6  -4  111.59    6.90
   0   6  -4  109.89    9.70
   0  -6   4  104.49    6.60
   0  -6   4  110.09   10.70
  -1   6  -4   88.29    8.80
  -1   6  -4   88.99    6.50
   1  -6   4   97.59    8.10
   1  -6   4   89.79    8.40
  -2   6  -4 2501.55   68.09
  -2   6  -4 2601.34   57.79
   2  -6   4 2505.05   56.49
   2  -6   4 2580.14   62.29
   2  -6   4 2584.04   71.99
  -3   6  -4  888.51   28.50
  -3   6  -4  959.20   34.10
  -3   6  -4  948.01   27.40
   3  -6   4  937.21   33.20
   3  -6   4  936.91   26.40
   3  -6   4  932.91   29.30
  -4   6  -4   13.30    4.50
  -4   6  -4   14.50    4.40
  -4   6  -4    7.40    4.20
   4  -6   4   11.70    5.50
   4  -6   4   13.40    4.50
   4  -6   4   13.80    3.80
  -5   6  -4  317.57   19.60
  -5   6  -4  322.87   17.20
   5  -6   4  301.57   16.40
   5  -6   4  319.47   16.30
  -6   6  -4  452.55   22.80
  -6   6  -4  494.35   25.80
   6  -6   4  445.16   21.60
  -7   6  -4  645.84   31.80
  -7   6  -4  632.64   29.80
   7  -6   4  638.64   28.30
  -8   6  -4   13.00    7.60
  -8   6  -4   26.80    8.50
   8  -6   4   10.40    4.50
  -9   6  -4  336.27   24.90
  -9   6  -4  400.46   25.80
   9  -6   4  365.76   23.00
 -10   6  -4  801.52   41.30
 -10   6  -4  787.42   40.90
  10  -6   4  751.92   36.80
 -11   6  -4  502.75   33.90
  11  -6   4  535.55   31.70
  11  -6   4  536.05   31.40
 -12   6  -4    1.10    8.20
  12  -6   4    6.50    8.20
  12  -6   4    0.10    6.10
 -13   6  -4   95.19   18.90
  13  -6   4   86.09   17.30
  13  -6   4   99.39   17.50
  14  -6   4  141.29   21.50
  14  -6   4  134.19   21.70
  15  -6   4   16.30   12.90
  12   5  -4   11.40   13.30
  12   5  -4   -1.80   15.60
  12   5  -4   13.40   12.40
  11   5  -4    2.70   12.90
  11   5  -4   22.00   10.00
  10   5  -4  299.37   21.60
  10   5  -4  260.67   23.80
  10   5  -4  243.78   21.40
   9   5  -4   17.60    7.40
   9   5  -4   20.20   10.00
   8   5  -4  122.19   15.10
   8   5  -4  127.29   13.40
   7   5  -4    6.60    4.20
   7   5  -4   -4.60    5.80
   6   5  -4  591.24   28.00
   6   5  -4  578.84   24.80
   5   5  -4  283.77   14.90
   5   5  -4  313.17   18.10
   5   5  -4  333.77   16.30
   5   5  -4  343.67   19.40
  -5  -5   4  322.37   17.50
   4   5  -4  392.26   16.50
   4   5  -4  380.76   15.90
   4   5  -4  414.36   20.50
   4   5  -4  359.76   18.00
  -4  -5   4  400.36   17.70
   3   5  -4    2.10    1.70
   3   5  -4    1.60    3.30
   3   5  -4    4.40    2.10
   3   5  -4   -1.30    2.70
  -3  -5   4    5.90    2.90
   2   5  -4  220.18   10.20
   2   5  -4  209.58    9.20
   2   5  -4  219.88   13.10
   2   5  -4  218.58    9.10
  -2  -5   4  211.28   12.10
  -2  -5   4  221.38   10.10
   1   5  -4  480.35   13.10
   1   5  -4  447.36   14.50
   1   5  -4  480.25   14.00
   1   5  -4  448.66   19.60
  -1  -5   4  462.65   14.80
  -1  -5   4  468.75   18.40
   0   5  -4    5.90    1.90
   0   5  -4    3.70    0.90
   0   5  -4    8.20    3.80
   0  -5   4    2.60    2.50
   0  -5   4    6.40    2.00
  -1   5  -4  578.14   17.80
  -1   5  -4  584.14   15.00
  -1   5  -4  583.34   22.70
   1  -5   4  593.14   17.90
   1  -5   4  577.14   14.40
   1  -5   4  547.55   21.50
  -2   5  -4    6.30    2.30
  -2   5  -4    1.50    2.70
  -2   5  -4    6.10    2.00
   2  -5   4    4.90    2.00
   2  -5   4    9.10    4.00
  -3   5  -4    4.90    2.60
  -3   5  -4    0.50    2.40
  -3   5  -4    6.30    2.40
   3  -5   4    2.80    2.30
   3  -5   4    2.60    2.00
  -4   5  -4    2.20    2.40
  -4   5  -4   -0.40    3.10
   4  -5   4    1.40    2.50
   4  -5   4    4.50    2.40
   4  -5   4    6.60    4.50
  -5   5  -4  433.86   22.50
  -5   5  -4  434.36   20.30
   5  -5   4  424.16   19.30
   5  -5   4  404.56   19.40
  -6   5  -4  337.47   21.10
  -6   5  -4  383.56   20.50
   6  -5   4  344.87   18.40
  -7   5  -4  336.97   21.40
  -7   5  -4  335.57   21.80
   7  -5   4  349.07   19.30
  -8   5  -4   60.59   10.90
  -8   5  -4   50.29    9.80
   8  -5   4   48.10    8.00
  -9   5  -4    4.70    5.50
  -9   5  -4    6.60    5.50
   9  -5   4    7.40    5.10
 -10   5  -4   64.19   12.30
 -10   5  -4   63.19   12.30
  10  -5   4   65.59   10.50
 -11   5  -4  108.49   17.90
 -11   5  -4  108.39   16.50
  11  -5   4  130.89   16.00
  11  -5   4  110.99   14.70
 -12   5  -4   -7.60    7.90
  12  -5   4   -3.90    7.00
  12  -5   4   -4.60    6.10
 -13   5  -4   -3.90    9.90
  13  -5   4   19.60   10.90
  13  -5   4  -10.70    6.60
 -14   5  -4   52.79   15.20
  14  -5   4   32.00   11.20
  14  -5   4   44.70   13.70
 -15   5  -4  143.19   26.10
  15  -5   4  170.98   25.30
  13   4  -4  -12.70   13.50
  13   4  -4   23.30   12.70
  12   4  -4  -10.30   10.50
  12   4  -4   -0.20   10.20
  12   4  -4   -0.90    9.70
  11   4  -4   33.10   12.60
  11   4  -4   13.00   10.50
  11   4  -4    7.00    8.50
  10   4  -4   12.40    7.80
  10   4  -4   -2.90    7.10
  10   4  -4    7.50    6.10
   9   4  -4   10.80    6.00
   9   4  -4    2.80    5.60
   8   4  -4   12.50    6.20
   8   4  -4   20.70    7.30
   7   4  -4    7.50    5.50
   7   4  -4   16.10    6.40
   6   4  -4   15.20    5.50
   6   4  -4   15.90    4.70
   5   4  -4    4.40    2.90
   5   4  -4    2.70    3.70
   5   4  -4   -5.30    4.50
   5   4  -4    5.30    3.70
   4   4  -4    9.10    3.60
   4   4  -4   12.70    4.60
   4   4  -4   14.90    5.40
   4   4  -4    9.00    4.10
   4   4  -4   12.90    3.80
  -4  -4   4    5.20    2.80
   3   4  -4  859.91   29.90
   3   4  -4  862.61   25.80
   3   4  -4  908.81   30.10
   3   4  -4  878.91   24.80
   3   4  -4  876.71   27.90
  -3  -4   4  862.41   26.00
   2   4  -4   88.59    5.20
   2   4  -4   98.79    5.90
   2   4  -4   89.49    6.60
   2   4  -4   98.49    8.30
  -2  -4   4   93.79    5.70
  -2  -4   4  100.39    8.00
   1   4  -4  740.53   24.80
   1   4  -4  720.63   18.80
   1   4  -4  707.83   18.60
  -1  -4   4  723.43   18.80
  -1  -4   4  721.93   18.70
  -1  -4   4  708.03   23.20
   0   4  -4 1753.92   46.10
   0   4  -4 1698.63   39.00
   0   4  -4 1669.03   38.00
   0  -4   4 1669.63   44.40
   0  -4   4 1727.23   38.90
   0  -4   4 1687.53   38.60
  -1   4  -4 4538.65  104.69
  -1   4  -4 4482.55   96.89
  -1   4  -4 4537.85   97.69
   1  -4   4 4516.95   96.29
   1  -4   4 4431.06  103.59
   1  -4   4 4500.05   97.79
  -2   4  -4  237.58   10.10
  -2   4  -4  234.98   13.10
  -2   4  -4  232.68    9.80
   2  -4   4  235.38    9.70
   2  -4   4  240.98   10.20
   2  -4   4  237.98   13.00
  -3   4  -4 2912.91   69.49
  -3   4  -4 2869.01   73.89
   3  -4   4 2850.21   68.39
   3  -4   4 2805.62   72.99
   3  -4   4 2884.41   68.39
  -4   4  -4  792.82   29.90
  -4   4  -4  773.82   27.30
   4  -4   4  743.03   29.00
   4  -4   4  781.22   26.70
   4  -4   4  798.22   26.10
  -5   4  -4  314.47   18.20
  -5   4  -4  354.16   18.30
   5  -4   4  307.27   18.50
   5  -4   4  330.17   16.20
   5  -4   4  314.47   16.90
  -6   4  -4  174.58   14.50
  -6   4  -4  204.08   15.00
   6  -4   4  218.28   13.60
  -7   4  -4  684.33   32.40
  -7   4  -4  772.92   33.80
   7  -4   4  761.32   30.10
  -8   4  -4  563.04   34.80
  -8   4  -4  532.25   30.40
   8  -4   4  616.54   32.70
  -9   4  -4  258.57   21.00
  -9   4  -4  291.37   22.40
   9  -4   4  263.87   19.20
 -10   4  -4    7.70    6.10
 -10   4  -4    2.80    6.30
  10  -4   4    4.30    5.50
 -11   4  -4  126.49   16.50
 -11   4  -4   95.59   16.90
  11  -4   4  106.39   14.40
 -12   4  -4   86.69   16.30
  12  -4   4   88.89   15.00
  12  -4   4   86.39   15.90
 -13   4  -4   89.09   18.90
  13  -4   4   90.69   17.00
  13  -4   4  153.78   19.90
 -14   4  -4   20.00   12.80
  14  -4   4   -3.90    9.70
 -15   4  -4    2.50   14.40
  15  -4   4   14.50   13.30
  13   3  -4   32.50   14.50
  13   3  -4    7.80   11.90
  13   3  -4   -8.50   11.20
  12   3  -4  147.29   20.30
  12   3  -4  146.39   20.60
  12   3  -4  145.79   19.20
  11   3  -4  317.47   25.20
  11   3  -4  253.47   21.50
  11   3  -4  258.57   23.00
  10   3  -4    6.40    5.90
  10   3  -4    4.20    6.70
  10   3  -4   -9.20    6.20
   9   3  -4    7.90    4.80
   9   3  -4    9.90    6.80
   9   3  -4    1.20    5.40
   8   3  -4   79.39   10.90
   8   3  -4   73.19   11.40
   7   3  -4  447.66   25.90
   7   3  -4  548.65   25.30
   6   3  -4   -2.40    2.90
   6   3  -4    0.60    4.40
   6   3  -4   -2.20    2.80
   5   3  -4    5.00    4.10
   5   3  -4    3.90    2.60
   5   3  -4    1.20    2.90
   5   3  -4   -0.20    2.70
   4   3  -4  343.37   16.60
   4   3  -4  321.07   14.50
   4   3  -4  314.17   16.90
   4   3  -4  305.27   13.30
   3   3  -4  432.66   17.70
   3   3  -4  429.76   18.40
   3   3  -4  437.46   14.60
   3   3  -4  449.46   16.20
   3   3  -4  437.36   18.20
  -3  -3   4  422.36   15.50
   2   3  -4   25.50    3.20
   2   3  -4   22.20    4.20
   2   3  -4   22.00    2.40
  -2  -3   4   26.60    3.40
  -2  -3   4   21.20    2.80
  -2  -3   4   23.70    3.90
   1   3  -4   66.29    3.00
   1   3  -4   75.09    4.30
  -1  -3   4   65.89    3.20
  -1  -3   4   61.79    4.10
  -1  -3   4   59.69    5.60
   0   3  -4  173.78    9.80
   0   3  -4  178.18    6.70
   0   3  -4  166.98    5.60
   0  -3   4  176.68    5.60
   0  -3   4  172.08    6.40
   0  -3   4  183.58    9.60
  -1   3  -4 1267.37   30.80
  -1   3  -4 1233.68   35.30
   1  -3   4 1269.57   30.10
   1  -3   4 1236.68   30.30
   1  -3   4 1254.07   34.80
  -2   3  -4  155.98   10.00
  -2   3  -4  142.49    7.90
   2  -3   4  155.28    7.90
   2  -3   4  159.18    9.90
   2  -3   4  148.09    7.40
  -3   3  -4    7.50    3.30
  -3   3  -4    0.80    1.90
   3  -3   4    1.00    2.10
   3  -3   4    7.70    2.70
   3  -3   4    9.90    2.70
  -4   3  -4    2.10    2.50
  -4   3  -4    3.30    2.70
   4  -3   4    3.20    2.70
   4  -3   4    1.50    2.20
  -5   3  -4   17.90    4.50
  -5   3  -4   15.80    4.50
   5  -3   4   13.30    4.70
   5  -3   4   30.10    6.80
   5  -3   4   21.60    5.40
  -6   3  -4  248.68   17.00
  -6   3  -4  268.67   17.40
  -7   3  -4    6.40    4.80
  -7   3  -4   15.10    5.30
   7  -3   4    9.60    3.40
   8  -3   4   51.79   11.70
  -9   3  -4  203.98   19.70
  -9   3  -4  226.58   19.40
   9  -3   4  224.68   17.60
 -10   3  -4   67.89   13.70
 -10   3  -4   67.49   12.20
  10  -3   4   83.49   12.40
 -11   3  -4   -0.30    6.40
 -11   3  -4   23.00    9.40
  11  -3   4   -3.30    5.40
 -12   3  -4   13.40   10.70
 -12   3  -4   16.00   11.10
  12  -3   4   38.10   11.80
  12  -3   4    7.60    7.40
 -13   3  -4   52.09   14.80
  13  -3   4   40.90   12.70
  13  -3   4   19.70   11.00
  14  -3   4  124.79   20.90
  14  -3   4  175.58   23.30
  15  -3   4   -7.90   10.50
  15  -3   4   25.40   17.70
  14   2  -4  -27.50   10.90
  14   2  -4   12.70   12.90
  14   2  -4   -1.70   13.00
  13   2  -4   -4.80    9.10
  13   2  -4  -22.60   10.00
  13   2  -4   15.10   11.30
  12   2  -4   -7.10    8.20
  12   2  -4   -0.10    8.70
  12   2  -4   21.80    8.50
  11   2  -4   52.09   12.30
  11   2  -4   31.40   11.70
  11   2  -4   47.20   10.60
  10   2  -4   61.99   11.90
  10   2  -4   60.59   12.20
  10   2  -4   56.99   11.30
 -10  -2   4   75.69   13.50
   9   2  -4  139.69   14.90
   9   2  -4  135.89   15.00
   9   2  -4  165.58   14.60
  -9  -2   4  163.28   17.10
   8   2  -4   39.90    9.40
   8   2  -4   37.20    7.70
  -8  -2   4   45.50    9.80
   7   2  -4  535.95   25.20
  -7  -2   4  536.55   27.10
   6   2  -4  257.87   15.60
   6   2  -4  280.87   16.50
   6   2  -4  271.07   15.20
  -6  -2   4  291.57   18.00
   5   2  -4   13.80    4.20
   5   2  -4   20.60    4.70
   5   2  -4    9.20    4.40
   5   2  -4   22.10    4.50
   4   2  -4   98.99    7.70
   4   2  -4   87.89    6.70
   4   2  -4   82.79    7.40
   4   2  -4   93.99    8.90
   4   2  -4   87.19    8.50
   3   2  -4 3967.90   87.19
   3   2  -4 3702.73   89.39
   3   2  -4 3713.43   89.99
   3   2  -4 3831.92   84.69
   3   2  -4 3762.12   88.69
   2   2  -4 2448.75   59.49
   2   2  -4 2472.95   56.99
  -2  -2   4 2462.75   57.09
  -2  -2   4 2446.26   58.79
   1   2  -4 1417.16   33.60
   1   2  -4 1421.46   36.80
  -1  -2   4 1382.46   35.90
  -1  -2   4 1404.16   33.60
   0   2  -4  542.55   18.00
   0   2  -4  519.95   14.90
   0  -2   4  516.65   14.70
   0  -2   4  526.15   17.30
   0  -2   4  539.85   12.40
   0  -2   4  555.34   12.80
  -1   2  -4 3649.53   80.89
  -1   2  -4 3647.14   83.99
   1  -2   4 3651.73   80.09
   1  -2   4 3672.73   80.59
   1  -2   4 3674.33   83.79
  -2   2  -4  172.28    9.90
  -2   2  -4  155.68    8.40
   2  -2   4  146.69    8.20
   2  -2   4  154.98    9.50
   2  -2   4  151.58    8.20
  -3   2  -4  916.71   29.10
  -3   2  -4  863.91   27.60
   3  -2   4  860.31   28.40
   3  -2   4  832.12   26.90
   3  -2   4  828.42   26.70
  -4   2  -4 2133.59   58.89
  -4   2  -4 2225.98   59.19
   4  -2   4 2202.28   59.49
   4  -2   4 2228.98   58.19
   4  -2   4 2137.49   57.99
  -5   2  -4 1408.46   44.90
  -5   2  -4 1382.46   44.80
   5  -2   4 1461.75   44.20
   5  -2   4 1371.76   44.50
  -6   2  -4 1157.08   41.10
  -6   2  -4 1173.78   42.10
  -7   2  -4   24.70    7.00
  -7   2  -4   22.40    5.60
  -8   2  -4  171.38   16.60
  -8   2  -4  133.79   15.40
  -9   2  -4  505.25   29.50
  -9   2  -4  501.95   30.90
 -10   2  -4  617.04   34.30
 -10   2  -4  590.44   36.10
  10  -2   4  612.24   31.90
 -11   2  -4    7.10    6.50
 -11   2  -4   15.90    8.20
  11  -2   4   10.60    6.80
 -12   2  -4   -4.20    7.70
  12  -2   4   -3.60    6.70
 -13   2  -4   32.40   12.70
  13  -2   4   16.90    9.60
  13  -2   4   15.40   10.10
 -14   2  -4   98.29   21.80
  14  -2   4  111.69   20.50
  14  -2   4  133.19   21.20
 -15   2  -4   15.70   18.50
  15  -2   4   26.90   15.60
  14   1  -4   36.90   19.60
  14   1  -4   33.10   14.90
  14   1  -4   38.70   14.20
  13   1  -4   77.19   14.50
  13   1  -4  118.59   18.10
  13   1  -4  121.29   20.00
  12   1  -4   95.89   17.20
  12   1  -4   59.59   12.40
  12   1  -4   96.59   22.70
 -12  -1   4   73.99   16.70
  11   1  -4    5.60    7.90
  11   1  -4    6.40    7.10
 -11  -1   4   -3.10    7.00
  10   1  -4  138.99   14.50
  10   1  -4  147.69   16.30
 -10  -1   4  149.29   17.20
   9   1  -4  454.35   28.10
   9   1  -4  466.95   26.40
  -9  -1   4  535.55   29.80
   8   1  -4  586.54   25.60
   8   1  -4  557.64   31.60
  -8  -1   4  592.14   29.50
   7   1  -4   19.00    6.40
   7   1  -4   13.50    4.50
  -7  -1   4   30.00    7.80
   6   1  -4  193.18   12.90
   6   1  -4  178.68   12.60
   6   1  -4  174.18   11.10
  -6  -1   4  158.48   13.00
   5   1  -4  137.59    8.90
   5   1  -4  136.49   11.60
   5   1  -4  152.18   11.80
   5   1  -4  140.59   11.50
   5   1  -4  153.28   10.70
  -5  -1   4  155.58   11.70
   4   1  -4    6.20    2.40
   4   1  -4    6.10    3.00
   4   1  -4    3.50    2.90
  -4  -1   4    3.30    2.50
   3   1  -4  562.24   19.30
   3   1  -4  541.35   20.30
   3   1  -4  554.34   16.40
   3   1  -4  546.45   18.60
  -3  -1   4  550.14   18.70
   2   1  -4   76.69    6.10
   2   1  -4   72.39    3.80
   2   1  -4   71.99    5.60
   2   1  -4   74.19    5.20
  -2  -1   4   75.59    5.20
   1   1  -4   53.49    2.50
   1   1  -4   53.29    4.00
   1   1  -4   55.79    4.70
  -1  -1   4   53.39    2.50
  -1  -1   4   60.99    4.20
  -1  -1   4   57.79    4.50
   0   1  -4   11.20    2.30
   0   1  -4   11.50    2.70
   0   1  -4   11.20    1.50
   0  -1   4    9.00    1.40
   0  -1   4   12.40    2.80
   0  -1   4   12.00    2.30
  -1   1  -4   61.59    4.80
  -1   1  -4   60.09    4.40
  -1   1  -4   66.19    5.30
   1  -1   4   65.39    4.30
   1  -1   4   57.69    4.50
   1  -1   4   74.69    5.60
  -2   1  -4    4.90    2.20
  -2   1  -4    7.80    2.80
  -2   1  -4    4.20    2.00
   2  -1   4   10.50    3.10
   2  -1   4    9.80    2.80
   2  -1   4    4.70    2.20
  -3   1  -4   12.00    3.50
  -3   1  -4   15.50    3.90
  -3   1  -4   15.50    4.00
   3  -1   4   15.70    3.60
   3  -1   4   15.60    3.90
  -4   1  -4   26.10    4.80
  -4   1  -4   19.10    4.90
  -4   1  -4   22.50    5.20
   4  -1   4   24.60    5.40
   4  -1   4   22.80    5.90
   4  -1   4   20.90    5.60
  -5   1  -4    2.90    3.20
  -5   1  -4    4.30    3.10
   5  -1   4    6.90    3.70
   5  -1   4   -2.40    2.90
   5  -1   4    6.50    4.00
  -6   1  -4   50.49    7.90
  -6   1  -4   49.50    8.10
  -7   1  -4   75.29   10.80
  -7   1  -4   62.39    9.20
  -8   1  -4  151.58   16.10
  -8   1  -4  120.49   13.80
  -9   1  -4   60.19   11.80
  -9   1  -4   54.99   12.80
 -10   1  -4    2.00    6.00
 -10   1  -4    1.40    5.90
 -11   1  -4   -1.00    7.00
 -11   1  -4    0.30    5.90
 -12   1  -4   -1.10    8.80
 -12   1  -4   12.80    9.50
  12  -1   4   -1.10    7.60
  12  -1   4    4.90   10.00
 -13   1  -4   17.80   11.70
  13  -1   4   10.20   10.10
  13  -1   4    3.60   10.10
 -14   1  -4   48.60   17.30
  14  -1   4   47.70   13.30
  14  -1   4   45.10   15.20
  15   0  -4    3.50   13.70
  14   0  -4    2.30   11.10
  14   0  -4   29.50   13.50
  14   0  -4   13.60   11.60
  13   0  -4  136.79   19.80
  13   0  -4  116.59   25.30
 -13   0   4  120.49   21.40
  12   0  -4  221.58   21.80
  12   0  -4  182.18   19.40
 -12   0   4  189.78   25.20
  11   0  -4    7.80    6.00
  11   0  -4    2.20    6.30
 -11   0   4   13.80    8.00
  10   0  -4   46.80   10.00
  10   0  -4   59.29   10.70
 -10   0   4   68.99   14.50
   9   0  -4 1051.79   41.30
  -9   0   4  924.91   41.50
   8   0  -4  910.31   44.50
   8   0  -4  764.92   31.10
  -8   0   4  819.82   46.00
   7   0  -4   25.30    5.90
   7   0  -4   22.70    6.30
  -7   0   4   17.70    5.30
   6   0  -4  328.37   17.40
   6   0  -4  328.77   15.90
  -6   0   4  334.87   18.90
   5   0  -4 3251.67   83.69
   5   0  -4 3289.27   78.59
   5   0  -4 3259.77   84.49
   5   0  -4 3272.97   81.19
  -5   0   4 3381.76   83.89
   4   0  -4 5216.98  115.89
   4   0  -4 5287.17  121.09
   4   0  -4 5234.38  118.39
  -4   0   4 5223.78  120.39
  -4   0   4 5119.19  117.99
   3   0  -4 2425.26   58.29
   3   0  -4 2451.45   59.89
   3   0  -4 2403.36   55.99
  -3   0   4 2416.86   59.69
  -3   0   4 2407.66   55.79
  -3   0   4 2391.86   58.09
   2   0  -4   16.60    2.30
   2   0  -4    6.50    2.40
   2   0  -4   13.30    2.60
   2   0  -4    8.00    2.20
  -2   0   4    9.50    2.00
  -2   0   4    6.80    2.00
   1   0  -4 1777.72   41.70
   1   0  -4 1778.02   40.30
   1   0  -4 1788.82   42.10
  -1   0   4 1818.02   41.60
  -1   0   4 1758.02   41.90
  -1   0   4 1805.32   40.40
   0   0  -4 5314.87  114.09
   0   0  -4 5380.76  114.79
   0   0  -4 5239.18  115.29
   0   0   4 5412.06  113.99
   0   0   4 5464.75  114.69
   0   0   4 5337.37  115.29
  -1   0  -4    2.90    1.90
  -1   0  -4   -0.10    1.30
  -1   0  -4    2.10    1.40
   1   0   4    2.50    1.30
   1   0   4    2.70    1.50
   1   0   4    3.50    1.70
  -2   0  -4    1.90    1.80
  -2   0  -4    2.40    2.00
  -2   0  -4    5.30    2.50
   2   0   4    4.60    2.20
   2   0   4    8.00    2.80
   2   0   4    1.10    1.30
  -3   0  -4  439.46   18.20
  -3   0  -4  443.86   18.50
   3   0   4  441.46   17.90
   3   0   4  429.66   17.40
  -4   0  -4   10.20    3.50
  -4   0  -4    7.10    3.30
  -4   0  -4    8.20    3.10
   4   0   4    7.60    3.40
   4   0   4    2.40    2.80
   4   0   4    9.00    3.50
  -5   0  -4  591.84   26.10
  -5   0  -4  616.64   25.10
  -5   0  -4  568.14   25.70
   5   0   4  612.94   28.00
   5   0   4  568.54   27.50
   5   0   4  556.34   24.50
  -6   0  -4  305.07   18.00
  -6   0  -4  309.17   19.50
  -6   0  -4  330.17   20.20
  -7   0  -4    0.70    4.10
  -7   0  -4   -0.30    3.60
  -8   0  -4  354.86   26.60
  -8   0  -4  400.86   25.50
  -9   0  -4  839.32   42.00
  -9   0  -4  864.01   38.90
 -10   0  -4    8.40    7.20
 -10   0  -4    0.50    6.60
 -11   0  -4    1.30    7.20
 -11   0  -4   14.80    9.50
 -12   0  -4  302.17   34.90
 -12   0  -4  317.27   30.70
  12   0   4  310.67   25.90
  12   0   4  288.57   25.90
 -13   0  -4  176.98   24.10
  13   0   4  228.28   24.40
  13   0   4  182.58   24.10
 -14   0  -4   -1.80   13.10
  14   0   4   -4.50   11.70
  15  -1  -4   24.10   14.90
  15  -1  -4  -26.10   11.80
 -15   1   4    1.70   14.60
  14  -1  -4    4.50   10.80
  14  -1  -4   -1.30    9.90
 -14   1   4   -1.10   11.60
  13  -1  -4   63.39   15.30
  13  -1  -4  117.49   26.10
 -13   1   4   94.49   19.10
  12  -1  -4  235.18   20.80
  12  -1  -4  238.68   21.50
 -12   1   4  234.78   22.90
  11  -1  -4  220.58   18.70
  11  -1  -4  208.18   20.00
 -11   1   4  190.78   20.20
  10  -1  -4  116.19   13.50
  10  -1  -4  137.99   14.90
 -10   1   4   81.69   13.80
   9  -1  -4  121.99   18.30
   9  -1  -4  123.29   13.40
  -9   1   4  102.79   13.30
   8  -1  -4  109.19   11.90
   8  -1  -4  117.89   11.40
  -8   1   4   91.99   11.90
   7  -1  -4  193.68   13.30
   7  -1  -4  202.98   14.60
  -7   1   4  231.98   16.50
   6  -1  -4   60.39    6.80
   6  -1  -4   58.79    7.30
  -6   1   4   68.99    8.30
   5  -1  -4   98.29    7.90
   5  -1  -4   92.59    8.90
   5  -1  -4  106.39    8.70
   5  -1  -4   99.89    9.80
  -5   1   4   93.39    8.70
   4  -1  -4  456.05   17.00
   4  -1  -4  484.75   18.30
   4  -1  -4  501.85   19.80
  -4   1   4  443.36   16.60
  -4   1   4  486.05   19.40
  -4   1   4  450.05   17.80
   3  -1  -4  418.06   16.60
   3  -1  -4  463.75   15.80
  -3   1   4  451.55   16.30
  -3   1   4  455.15   15.60
  -3   1   4  496.45   17.70
   2  -1  -4    0.70    1.30
   2  -1  -4    0.80    1.20
   2  -1  -4    2.10    1.20
  -2   1   4    2.00    1.50
  -2   1   4    1.70    1.50
  -2   1   4    1.40    1.40
   1  -1  -4   45.00    3.70
   1  -1  -4   41.00    3.80
   1  -1  -4   39.70    3.20
   1  -1  -4   38.00    3.00
  -1   1   4   36.50    3.50
  -1   1   4   34.30    3.60
   0  -1  -4  234.08    9.40
   0  -1  -4  248.18    7.90
   0  -1  -4  243.88    9.80
   0   1   4  242.68    7.60
   0   1   4  247.98    9.70
   0   1   4  252.77    9.70
  -1  -1  -4   -0.30    1.00
  -1  -1  -4    1.10    1.10
  -1  -1  -4    2.20    1.70
   1   1   4   -1.70    1.00
   1   1   4    1.00    1.40
   1   1   4    0.60    1.20
  -2  -1  -4    2.30    1.70
  -2  -1  -4    5.00    2.40
   2   1   4    6.40    2.40
   2   1   4    4.00    2.10
   2   1   4    7.20    2.50
  -3  -1  -4   71.39    7.10
  -3  -1  -4   77.39    7.30
  -3  -1  -4   82.39    6.80
   3   1   4   75.99    6.90
   3   1   4   90.19    7.70
   3   1   4   77.69    6.80
  -4  -1  -4  293.27   16.10
  -4  -1  -4  261.17   15.30
  -4  -1  -4  259.17   13.90
   4   1   4  265.07   14.50
   4   1   4  272.07   15.10
   4   1   4  291.37   14.90
  -5  -1  -4  123.49   11.60
  -5  -1  -4  113.69   11.20
  -5  -1  -4  131.19   10.50
  -6  -1  -4   15.10    5.40
  -6  -1  -4    8.00    4.30
  -6  -1  -4    6.20    3.50
  -7  -1  -4    3.00    4.00
  -7  -1  -4   14.30    6.20
  -7  -1  -4   -1.80    3.70
  -8  -1  -4  135.09   16.30
  -9  -1  -4  193.78   20.40
  -9  -1  -4  185.58   18.10
 -10  -1  -4    4.90    6.10
 -10  -1  -4   19.70    8.50
 -11  -1  -4   26.90   10.90
 -11  -1  -4   13.40    9.40
 -12  -1  -4   16.90    9.80
  12   1   4   -5.50    8.90
 -13  -1  -4   96.19   18.40
  13   1   4  111.19   20.50
  13   1   4  109.59   19.00
 -14  -1  -4   40.30   27.40
  14   1   4   33.30   14.80
  15  -2  -4   24.90   13.10
 -15   2   4  -14.00   12.50
  14  -2  -4  109.19   20.10
  14  -2  -4  141.69   20.90
 -14   2   4  131.89   21.10
  13  -2  -4    2.20   11.30
  13  -2  -4   -3.80    9.80
 -13   2   4    2.20    9.50
  12  -2  -4   59.19   13.70
  12  -2  -4   43.80   10.30
 -12   2   4   54.99   14.60
  11  -2  -4   13.90    6.90
  11  -2  -4   30.80    9.70
 -11   2   4   33.10    9.90
  10  -2  -4   97.09   13.30
  10  -2  -4   86.09   12.20
 -10   2   4   93.79   13.10
   9  -2  -4   36.30    8.10
   9  -2  -4   48.30    8.60
  -9   2   4   58.39    9.80
   8  -2  -4  618.84   27.20
   8  -2  -4  627.34   28.50
  -8   2   4  585.44   29.40
   7  -2  -4   11.40    3.70
   7  -2  -4    1.80    2.60
  -7   2   4    6.80    3.90
   6  -2  -4    5.10    2.90
   6  -2  -4    5.60    2.90
  -6   2   4    8.70    4.10
   5  -2  -4  550.34   21.30
   5  -2  -4  506.45   22.40
   5  -2  -4  531.05   20.60
  -5   2   4  527.35   22.30
  -5   2   4  539.15   20.30
   4  -2  -4  144.99    9.80
   4  -2  -4  142.19    8.90
   4  -2  -4  126.49    8.60
  -4   2   4  125.49    9.20
  -4   2   4  131.89    8.80
  -4   2   4  134.89    8.80
   3  -2  -4   16.40    3.20
   3  -2  -4   11.90    3.10
   3  -2  -4   17.80    3.60
  -3   2   4   17.10    3.70
  -3   2   4   13.90    2.60
  -3   2   4   14.90    3.50
   2  -2  -4  596.84   19.30
   2  -2  -4  597.64   18.10
   2  -2  -4  647.94   19.20
  -2   2   4  633.74   18.20
  -2   2   4  616.54   18.90
   1  -2  -4 3433.56   73.29
   1  -2  -4 3444.96   77.09
   1  -2  -4 3524.65   73.99
  -1   2   4 3385.16   76.69
   0  -2  -4   15.10    2.60
   0  -2  -4   14.50    3.20
   0  -2  -4   10.80    1.10
   0   2   4   17.10    3.30
   0   2   4   13.80    2.80
   0   2   4   10.50    0.90
  -1  -2  -4 1730.93   45.10
  -1  -2  -4 1822.72   40.10
  -1  -2  -4 1752.42   44.50
   1   2   4 1734.83   44.70
   1   2   4 1770.32   44.10
   1   2   4 1807.32   40.40
  -2  -2  -4 1922.01   49.60
  -2  -2  -4 1882.21   49.80
  -2  -2  -4 1894.91   45.60
   2   2   4 1910.41   49.00
   2   2   4 1863.51   49.20
   2   2   4 1933.21   46.20
  -3  -2  -4 1796.52   49.70
  -3  -2  -4 1740.63   49.30
  -3  -2  -4 1824.52   46.10
   3   2   4 1754.22   46.00
   3   2   4 1792.12   48.50
   3   2   4 1694.53   47.60
  -4  -2  -4   15.50    4.70
  -4  -2  -4   10.60    3.10
  -4  -2  -4   26.00    4.80
   4   2   4   25.20    5.70
   4   2   4   10.90    4.40
   4   2   4   17.20    4.80
  -5  -2  -4  312.07   18.70
  -5  -2  -4  341.57   17.60
  -5  -2  -4  384.66   20.70
   5   2   4  342.97   18.50
  -6  -2  -4 1007.80   40.10
  -6  -2  -4 1036.40   40.60
  -6  -2  -4 1006.50   36.80
  -7  -2  -4  731.73   31.80
  -7  -2  -4  715.23   35.00
  -7  -2  -4  797.02   38.60
  -8  -2  -4   11.00    7.50
  -8  -2  -4   -0.60    5.30
  -9  -2  -4  179.18   19.50
  -9  -2  -4  170.48   17.30
 -10  -2  -4  135.09   16.90
 -10  -2  -4  105.89   18.10
 -11  -2  -4  228.78   23.00
 -11  -2  -4  208.58   26.20
 -12  -2  -4   33.20   12.70
  12   2   4   20.80   10.20
 -13  -2  -4    8.90   12.90
  13   2   4   13.70   12.30
  15  -3  -4   43.20   15.80
  15  -3  -4   53.79   14.30
  14  -3  -4  265.87   26.50
  14  -3  -4  222.28   23.90
 -14   3   4  251.47   27.90
  13  -3  -4  285.77   25.70
  13  -3  -4  277.97   34.10
 -13   3   4  311.37   27.30
  12  -3  -4   22.40    8.70
  12  -3  -4   26.40    8.50
 -12   3   4   25.00   10.30
  11  -3  -4   62.79   12.30
 -11   3   4   64.09   13.00
  10  -3  -4   86.19   11.90
  10  -3  -4  124.89   14.20
 -10   3   4  125.89   15.30
   9  -3  -4  362.86   21.50
   9  -3  -4  323.17   20.70
  -9   3   4  307.27   22.40
   8  -3  -4    4.10    3.70
   8  -3  -4   -0.80    3.20
  -8   3   4    1.20    3.80
   7  -3  -4    1.40    3.00
   7  -3  -4   -2.10    2.60
  -7   3   4    2.30    3.80
   6  -3  -4  176.78   12.40
   6  -3  -4  174.78   12.00
  -6   3   4  158.98   12.80
   5  -3  -4    8.40    3.00
   5  -3  -4    7.60    3.80
   5  -3  -4   11.20    3.40
   5  -3  -4   11.10    3.80
  -5   3   4    6.00    2.90
  -5   3   4    6.80    3.20
  -5   3   4    4.70    2.60
   4  -3  -4   45.10    5.30
   4  -3  -4   40.70    5.20
   4  -3  -4   47.00    6.30
  -4   3   4   37.30    5.30
  -4   3   4   43.30    5.50
   3  -3  -4   18.60    3.10
   3  -3  -4   25.30    4.00
   3  -3  -4   17.90    3.50
  -3   3   4   20.80    3.60
  -3   3   4   25.70    4.00
  -3   3   4   23.10    6.70
   2  -3  -4  405.76   14.20
   2  -3  -4  399.46   13.40
  -2   3   4  401.26   14.20
  -2   3   4  412.46   13.10
   1  -3  -4  127.99    8.10
   1  -3  -4  141.09    4.90
   1  -3  -4  131.39    7.10
  -1   3   4  139.89    4.60
  -1   3   4  147.29    8.50
  -1   3   4  138.39    7.10
   0  -3  -4  316.77   13.70
   0  -3  -4  327.67   12.50
   0   3   4  330.37   12.20
   0   3   4  333.47   13.70
  -1  -3  -4    8.90    3.00
  -1  -3  -4    7.00    2.60
   1   3   4    9.50    2.80
   1   3   4   11.80    1.90
   1   3   4    8.20    2.50
  -2  -3  -4   39.00    3.80
  -2  -3  -4   42.10    5.50
  -2  -3  -4   46.50    5.50
   2   3   4   35.10    4.10
   2   3   4   36.00    5.50
   2   3   4   47.20    5.40
  -3  -3  -4    0.00    1.70
  -3  -3  -4    1.60    2.90
  -3  -3  -4    2.30    2.70
   3   3   4   -2.00    2.60
   3   3   4    4.10    2.80
  -4  -3  -4   59.49    6.60
  -4  -3  -4   42.30    7.40
  -4  -3  -4   73.69    8.40
   4   3   4   52.79    7.60
   4   3   4   65.49    7.60
  -5  -3  -4   91.39   10.70
  -5  -3  -4   77.09    9.70
  -5  -3  -4   77.99    8.70
   5   3   4   69.19    9.10
  -6  -3  -4   -2.70    3.70
  -6  -3  -4   -7.70    3.20
  -6  -3  -4    2.20    3.50
  -7  -3  -4  338.07   23.30
  -7  -3  -4  320.67   20.30
  -7  -3  -4  344.67   23.50
  -8  -3  -4  326.57   24.70
  -8  -3  -4  249.28   19.10
  -8  -3  -4  283.37   23.20
  -9  -3  -4    3.10    6.70
  -9  -3  -4   16.10    7.70
 -10  -3  -4   10.50    8.50
 -10  -3  -4   -1.70    8.10
 -11  -3  -4   52.79   14.50
  11   3   4   68.19   16.40
 -12  -3  -4  135.89   22.40
  12   3   4  192.08   23.90
  13   3   4   10.80   12.00
  13   3   4  -18.20   11.90
  15  -4  -4   23.90   13.20
  14  -4  -4    1.60    9.70
  14  -4  -4   20.70   10.90
 -14   4   4   -3.60   10.70
  13  -4  -4   23.90   15.50
  13  -4  -4   27.90   10.50
 -13   4   4   16.50   10.70
  12  -4  -4   11.20    8.30
  12  -4  -4   22.40    8.70
 -12   4   4   36.60   12.70
  11  -4  -4  196.88   18.90
  11  -4  -4  187.78   17.40
 -11   4   4  160.88   18.50
  10  -4  -4   -2.40    4.30
  10  -4  -4   -0.40    4.60
 -10   4   4   -8.20    5.00
   9  -4  -4  223.58   16.80
   9  -4  -4  228.28   17.30
  -9   4   4  226.88   18.90
   8  -4  -4   38.80    8.70
   8  -4  -4   50.39    8.30
  -8   4   4   42.40    8.50
   7  -4  -4   95.89   10.30
   7  -4  -4   91.99    9.80
  -7   4   4   79.09   10.10
   6  -4  -4  121.89   10.10
   6  -4  -4  105.19   10.10
  -6   4   4   96.69   10.00
   5  -4  -4 1046.10   34.30
   5  -4  -4 1008.80   32.50
   5  -4  -4 1042.30   34.80
   5  -4  -4 1013.80   35.70
  -5   4   4 1035.70   34.20
  -5   4   4 1041.50   32.90
   4  -4  -4  443.96   17.30
   4  -4  -4  419.26   18.00
   4  -4  -4  430.66   18.70
  -4   4   4  426.26   17.20
  -4   4   4  416.86   17.50
   3  -4  -4   40.70    4.60
   3  -4  -4   39.60    5.30
   3  -4  -4   51.69    5.20
  -3   4   4   40.60    4.50
  -3   4   4   49.70    6.20
  -3   4   4   47.00    5.10
   2  -4  -4    1.90    1.60
   2  -4  -4    7.60    2.30
   2  -4  -4    2.10    1.60
  -2   4   4    3.00    1.70
  -2   4   4    5.50    3.00
  -2   4   4    0.70    1.70
   1  -4  -4 4253.97   89.39
   1  -4  -4 4309.97   95.59
   1  -4  -4 4229.28   99.19
  -1   4   4 4317.57   94.79
  -1   4   4 4392.26   89.49
  -1   4   4 4193.18   99.09
   0  -4  -4 1909.91   50.89
   0  -4  -4 1934.21   47.70
   0   4   4 1962.80   47.00
  -1  -4  -4  237.68   13.70
  -1  -4  -4  256.27   13.60
   1   4   4  258.07    8.10
   1   4   4  237.68   12.80
   1   4   4  253.47    7.70
   1   4   4  228.28   11.00
  -2  -4  -4    3.30    2.40
  -2  -4  -4    2.40    2.40
   2   4   4    4.90    2.30
   2   4   4    7.20    3.40
   2   4   4    1.30    1.50
  -3  -4  -4 1162.78   36.80
  -3  -4  -4 1126.19   32.10
  -3  -4  -4 1132.59   38.00
   3   4   4 1135.59   35.80
   3   4   4 1112.59   32.60
  -4  -4  -4  301.97   17.80
  -4  -4  -4  266.57   13.90
  -4  -4  -4  289.27   17.30
   4   4   4  316.87   17.10
   4   4   4  240.98   14.30
  -5  -4  -4   82.79    8.80
  -5  -4  -4   77.59   10.20
  -5  -4  -4   87.49   11.10
   5   4   4   92.19   11.80
  -6  -4  -4  207.38   17.10
  -6  -4  -4  187.08   16.90
  -6  -4  -4  209.98   15.00
  -7  -4  -4 1312.07   51.19
  -7  -4  -4 1274.07   51.29
  -7  -4  -4 1303.97   45.90
  -8  -4  -4  335.27   25.00
  -8  -4  -4  292.27   24.40
  -8  -4  -4  352.56   22.70
  -9  -4  -4   10.90    7.40
  -9  -4  -4   -0.50    7.90
 -10  -4  -4   21.40   10.70
  10   4   4    7.60    8.00
  11   4   4  197.18   21.30
  11   4   4  141.19   22.00
  12   4   4   54.39   15.50
  12   4   4   27.10   15.00
 -16   5   4   20.60   17.60
  15  -5  -4   81.59   17.00
  15  -5  -4   63.09   20.40
 -15   5   4   97.09   21.00
  14  -5  -4  190.88   22.40
 -14   5   4  139.89   21.90
  13  -5  -4   41.90   12.00
  13  -5  -4   63.19   14.70
 -13   5   4   28.10   11.30
  12  -5  -4   -3.20    6.70
  12  -5  -4   -0.20    6.40
 -12   5   4    5.20    7.80
  11  -5  -4  136.49   16.30
  11  -5  -4  133.69   15.90
 -11   5   4  113.19   16.00
  10  -5  -4  267.37   20.80
  10  -5  -4  298.57   21.40
 -10   5   4  308.47   23.30
   9  -5  -4   55.89   10.40
   9  -5  -4   73.89   10.60
  -9   5   4   62.49   11.40
   8  -5  -4   27.10    7.80
   8  -5  -4   17.60    5.70
  -8   5   4   11.10    5.80
   7  -5  -4  223.08   15.10
   7  -5  -4  267.77   16.90
  -7   5   4  238.38   17.00
   6  -5  -4   34.90    6.30
   6  -5  -4   39.30    6.60
  -6   5   4   41.80    7.20
   5  -5  -4    7.70    2.70
   5  -5  -4    1.30    3.60
   5  -5  -4    3.70    4.00
   5  -5  -4    8.00    3.50
  -5   5   4    3.20    3.20
  -5   5   4    0.80    2.50
   4  -5  -4   29.50    4.50
   4  -5  -4   28.00    5.50
   4  -5  -4   24.40    6.00
  -4   5   4   24.30    4.40
  -4   5   4   27.40    4.90
   3  -5  -4    2.20    2.70
   3  -5  -4   -2.20    1.60
   3  -5  -4   -1.50    2.70
  -3   5   4   -1.70    1.90
  -3   5   4    3.00    2.90
  -3   5   4    0.20    1.60
   2  -5  -4  275.07   11.50
   2  -5  -4  263.07   13.80
   2  -5  -4  258.17   10.10
  -2   5   4  252.87   10.90
  -2   5   4  260.47    9.70
  -2   5   4  260.07   14.00
   1  -5  -4    2.00    2.20
   1  -5  -4    1.60    0.80
   1  -5  -4    3.80    2.00
  -1   5   4    0.60    1.80
  -1   5   4    1.50    0.80
  -1   5   4   -0.60    2.60
   0  -5  -4    3.30    2.10
   0  -5  -4    1.20    2.60
   0   5   4    1.20    1.80
  -1  -5  -4    5.80    3.10
  -1  -5  -4    7.10    3.00
   1   5   4   11.00    2.10
   1   5   4   13.50    4.20
   1   5   4    8.00    1.70
   1   5   4    6.40    2.90
  -2  -5  -4   92.99    9.20
  -2  -5  -4   80.09    8.00
   2   5   4   89.59    7.70
   2   5   4   81.79    5.60
   2   5   4   73.49    5.70
  -3  -5  -4    5.20    3.00
  -3  -5  -4    0.90    2.50
   3   5   4    3.60    3.70
   3   5   4    4.30    2.70
   3   5   4    1.90    3.00
  -4  -5  -4  169.68   14.30
  -4  -5  -4  132.19   12.30
   4   5   4  149.09   11.30
   4   5   4  165.18   10.40
  -5  -5  -4   -0.90    4.40
   5   5   4    5.40    3.50
  -6  -5  -4  327.57   22.10
  -6  -5  -4  332.67   23.00
   6   5   4  330.57   18.20
  -7  -5  -4   70.69   13.50
  -7  -5  -4   80.19   13.00
   7   5   4   85.09   11.30
  -8  -5  -4   48.30   13.10
  -8  -5  -4   52.29   13.10
   8   5   4   78.09   12.30
  -9  -5  -4    1.70    8.80
   9   5   4   11.90    8.20
  10   5   4  115.19   19.30
  10   5   4  139.19   18.70
  11   5   4  106.69   20.60
  11   5   4   57.49   15.00
  12   5   4  -17.50   12.30
  15  -6  -4   43.80   14.40
 -15   6   4   44.70   17.00
  14  -6  -4   40.70   12.90
  14  -6  -4   31.10   12.70
 -14   6   4   52.09   15.60
  13  -6  -4   -1.40    7.50
  13  -6  -4   -9.30    7.10
 -13   6   4   -1.80    9.50
  12  -6  -4   -2.50    6.80
  12  -6  -4    1.70    6.80
 -12   6   4   -2.40    8.20
  11  -6  -4  320.37   24.10
  11  -6  -4  349.77   25.20
 -11   6   4  325.47   25.40
  10  -6  -4  229.28   19.10
  10  -6  -4  278.97   21.50
 -10   6   4  300.67   23.30
   9  -6  -4    3.70    4.00
   9  -6  -4    6.50    4.50
  -9   6   4    4.40    5.50
   8  -6  -4    7.20    4.70
   8  -6  -4   13.70    5.50
  -8   6   4   24.10    7.40
   7  -6  -4  719.13   28.40
   7  -6  -4  659.73   29.80
  -7   6   4  727.33   31.10
   6  -6  -4 2219.48   59.69
   6  -6  -4 2107.69   62.59
  -6   6   4 2160.38   61.79
   5  -6  -4  476.15   22.50
   5  -6  -4  504.05   23.20
   5  -6  -4  522.45   20.50
   5  -6  -4  472.95   22.00
  -5   6   4  491.15   21.00
  -5   6   4  490.05   20.20
   4  -6  -4  149.59    9.40
   4  -6  -4  156.48   11.10
   4  -6  -4  146.69   11.50
  -4   6   4  152.08    9.90
  -4   6   4  141.49    9.40
   3  -6  -4 1996.50   49.90
   3  -6  -4 1999.40   55.29
   3  -6  -4 1931.61   49.20
  -3   6   4 1943.81   48.90
  -3   6   4 1916.31   49.00
   2  -6  -4 4738.03  113.19
   2  -6  -4 4664.73  103.29
   2  -6  -4 4787.72  106.39
  -2   6   4 4815.32  105.79
  -2   6   4 4799.02  103.59
   1  -6  -4  560.24   13.30
   1  -6  -4  577.54   23.60
   1  -6  -4  577.94   18.90
  -1   6   4  571.34   14.00
  -1   6   4  571.04   18.00
   0  -6  -4   27.50    4.20
   0  -6  -4   37.50    5.80
   0   6   4   32.70    4.10
  -1  -6  -4  237.08   15.00
  -1  -6  -4  256.27   12.70
   1   6   4  269.07   12.20
   1   6   4  259.37    8.70
  -2  -6  -4  433.46   21.80
  -2  -6  -4  460.95   19.30
   2   6   4  461.65   15.20
   2   6   4  432.36   17.80
   2   6   4  447.66   15.30
  -3  -6  -4   86.09    9.60
  -3  -6  -4  100.49   10.70
   3   6   4   84.59    9.30
   3   6   4   85.19    7.10
   3   6   4   88.79    7.90
  -4  -6  -4   48.30    9.40
  -4  -6  -4   53.09   10.40
   4   6   4   56.29    8.40
   4   6   4   62.89    7.10
  -5  -6  -4   12.20    6.30
  -5  -6  -4   16.10    6.60
   5   6   4   20.20    5.70
  -6  -6  -4  253.77   19.50
  -6  -6  -4  186.78   18.50
   6   6   4  210.98   15.10
  -7  -6  -4  115.19   15.50
  -7  -6  -4   96.19   15.10
   7   6   4  100.69   13.00
  -8  -6  -4   61.19   14.90
  -8  -6  -4   46.70   11.50
   8   6   4   64.09   12.90
  -9  -6  -4   -4.50   10.10
   9   6   4   -5.30    8.50
   9   6   4   10.40    9.40
  10   6   4  133.59   21.60
  10   6   4   89.49   16.40
  11   6   4   94.59   19.10
  11   6   4   91.09   18.10
  15  -7  -4   48.90   14.70
 -15   7   4   13.00   14.60
  14  -7  -4   61.79   15.00
  14  -7  -4   27.10   13.70
 -14   7   4   53.39   15.50
  13  -7  -4   42.20   12.70
  13  -7  -4   30.90   12.50
 -13   7   4   65.49   16.70
  12  -7  -4    5.50    7.80
  12  -7  -4   11.20    7.70
 -12   7   4   -1.20    8.70
  11  -7  -4   85.49   14.60
  11  -7  -4   76.49   13.80
 -11   7   4   92.69   14.90
  10  -7  -4   76.19   12.90
  10  -7  -4   75.19   12.40
 -10   7   4   60.99   12.30
   9  -7  -4  441.66   24.40
   9  -7  -4  452.05   26.20
  -9   7   4  439.26   27.10
   8  -7  -4   69.39   10.50
   8  -7  -4   50.69    8.70
  -8   7   4   62.39   10.50
   7  -7  -4    2.20    3.60
   7  -7  -4    4.60    3.40
  -7   7   4    7.10    5.70
   6  -7  -4   55.59    8.70
   6  -7  -4   51.49    6.80
  -6   7   4   56.89    8.10
   5  -7  -4   75.99    9.90
   5  -7  -4   69.29    9.70
   5  -7  -4   76.29    7.40
   5  -7  -4   74.49    9.70
  -5   7   4   81.49    8.40
   4  -7  -4   78.99    9.60
   4  -7  -4   83.29    8.60
   4  -7  -4   75.99    7.00
  -4   7   4   72.59    7.50
  -4   7   4   89.89    7.80
   3  -7  -4  216.08   14.20
   3  -7  -4  194.58   10.40
   3  -7  -4  178.88    9.90
  -3   7   4  190.68   10.10
  -3   7   4  207.68   10.20
   2  -7  -4  138.89   11.40
   2  -7  -4  119.79    7.70
   2  -7  -4  110.79    6.10
  -2   7   4  113.69    6.20
  -2   7   4  112.99    7.10
   1  -7  -4   42.10    4.80
   1  -7  -4   37.50    7.00
  -1   7   4   34.00    4.40
  -1   7   4   40.30    2.70
  -1   7   4   39.70    2.60
   0  -7  -4  183.48    9.90
   0  -7  -4  203.08   14.10
   0   7   4  176.48    8.90
  -1  -7  -4  105.19    8.20
  -1  -7  -4  110.19   10.70
   1   7   4   93.99    7.50
  -2  -7  -4   93.49    9.10
  -2  -7  -4   94.09   10.40
   2   7   4   89.99    6.60
   2   7   4  100.09    6.80
  -3  -7  -4  318.07   30.70
  -3  -7  -4  306.17   17.00
   3   7   4  299.37   14.00
   3   7   4  283.27   15.80
   3   7   4  316.47   14.60
  -4  -7  -4   39.70    8.50
  -4  -7  -4   42.70    9.60
   4   7   4   46.50    7.00
  -5  -7  -4  135.09   15.50
  -5  -7  -4  132.99   14.10
   5   7   4  127.99   11.20
  -6  -7  -4   35.70   10.60
   6   7   4   45.50    9.00
  -7  -7  -4  128.09   18.50
  -7  -7  -4  149.59   19.50
   7   7   4  129.99   15.20
  -8  -7  -4    6.40   10.00
   8   7   4    3.70    8.30
   8   7   4   15.50    8.70
  -9  -7  -4   80.49   17.60
   9   7   4  121.19   18.80
   9   7   4  100.09   18.20
  10   7   4  -16.50   15.40
  10   7   4    8.70   12.20
  15  -8  -4   15.30   13.20
  15  -8  -4   34.30   14.70
  14  -8  -4   58.99   15.10
  14  -8  -4   73.59   17.40
 -14   8   4   74.49   18.00
  13  -8  -4  165.78   21.30
  13  -8  -4  125.69   20.30
 -13   8   4  161.68   21.40
  12  -8  -4  380.56   28.00
  12  -8  -4  407.56   28.20
 -12   8   4  318.87   27.00
  11  -8  -4   -2.60    7.60
  11  -8  -4    8.30    7.90
 -11   8   4   11.50    8.80
  10  -8  -4  315.37   21.90
  10  -8  -4  344.37   24.40
 -10   8   4  301.17   23.80
   9  -8  -4   89.99   11.50
   9  -8  -4   86.39   12.60
  -9   8   4  102.89   14.10
   8  -8  -4  270.17   19.50
   8  -8  -4  266.57   17.50
  -8   8   4  251.97   19.80
   7  -8  -4   -3.40    3.40
   7  -8  -4    2.30    3.90
  -7   8   4   -0.70    5.00
   6  -8  -4  353.16   21.30
   6  -8  -4  360.86   17.80
  -6   8   4  363.06   19.20
   5  -8  -4  336.87   18.50
   5  -8  -4  468.05   34.20
   5  -8  -4  352.26   19.60
   5  -8  -4  343.07   16.30
  -5   8   4  378.46   18.40
   4  -8  -4  804.82   32.40
   4  -8  -4  773.62   28.10
   4  -8  -4  782.32   25.60
   4  -8  -4  753.82   27.10
  -4   8   4  832.62   27.20
  -4   8   4  794.62   25.60
   3  -8  -4  507.05   18.30
   3  -8  -4  526.05   18.40
   3  -8  -4  593.84   25.80
  -3   8   4  517.95   18.40
  -3   8   4  473.95   17.50
   2  -8  -4   35.10    3.90
   2  -8  -4   41.90    5.00
   2  -8  -4   48.40    8.40
  -2   8   4   42.10    4.30
  -2   8   4   37.70    5.00
   1  -8  -4  301.27   18.10
   1  -8  -4  322.97   13.00
  -1   8   4  298.07    8.20
  -1   8   4  318.07   12.10
  -1   8   4  321.37    8.30
   0  -8  -4  539.15   18.60
   0  -8  -4  517.55   25.10
   0   8   4  515.95   17.10
  -1  -8  -4  328.07   21.60
  -1  -8  -4  335.87   15.30
   1   8   4  327.07    9.40
   1   8   4  337.27    9.40
   1   8   4  341.37   14.20
  -2  -8  -4   11.60    5.60
  -2  -8  -4   33.50    9.10
   2   8   4   32.90    4.60
   2   8   4   26.00    4.20
   2   8   4   22.30    5.60
  -3  -8  -4    6.00    5.30
  -3  -8  -4    7.40    5.10
  -4  -8  -4  112.29   13.20
  -4  -8  -4  155.58   16.00
   4   8   4  142.79   11.00
  -5  -8  -4  118.79   15.70
  -5  -8  -4  100.59   13.40
   5   8   4  117.59   11.50
  -6  -8  -4   23.40    8.70
  -6  -8  -4   25.50   10.30
   6   8   4   21.40    7.70
  -7  -8  -4   19.20   11.40
   7   8   4   11.00    8.30
   7   8   4   -3.80   10.10
  -8  -8  -4   27.10   12.30
   8   8   4   34.40   12.60
   8   8   4   39.30   11.70
  -9  -8  -4  113.29   22.50
   9   8   4  100.89   18.10
   9   8   4  127.39   20.80
  15  -9  -4   51.89   23.10
  15  -9  -4   51.79   16.90
 -15   9   4   22.50   17.70
  14  -9  -4   24.60   12.40
  14  -9  -4    2.50   12.50
 -14   9   4   31.70   12.80
  13  -9  -4  106.79   20.10
  13  -9  -4   93.39   17.80
 -13   9   4  112.79   20.00
  12  -9  -4   84.79   16.20
  12  -9  -4   74.49   15.90
 -12   9   4   58.29   14.80
  11  -9  -4   56.29   12.30
  11  -9  -4   51.39   10.90
 -11   9   4   79.49   14.60
  10  -9  -4   21.60    9.00
  10  -9  -4   34.30    9.60
 -10   9   4   29.70   10.30
   9  -9  -4   93.59   14.20
   9  -9  -4   67.99   11.10
  -9   9   4   93.99   13.40
   8  -9  -4   40.00    7.90
   8  -9  -4   29.70    8.90
   7  -9  -4    2.60    4.30
   7  -9  -4    1.80    4.00
  -7   9   4    5.30    5.30
   6  -9  -4   31.60    6.40
   6  -9  -4   29.20    8.00
  -6   9   4   15.40    5.30
   5  -9  -4   19.80    5.90
   5  -9  -4   22.90    7.60
   5  -9  -4   29.00    5.70
   5  -9  -4   34.90    7.10
  -5   9   4   30.80    6.10
   4  -9  -4   54.29    9.40
   4  -9  -4   44.40    8.00
   4  -9  -4   54.09    6.40
   4  -9  -4   47.10    8.60
  -4   9   4   58.39    6.90
   3  -9  -4   61.99    9.80
   3  -9  -4   58.09    6.70
  -3   9   4   61.99    6.30
   2  -9  -4   12.40    5.60
   2  -9  -4   21.30    3.60
   2  -9  -4   10.10    2.60
  -2   9   4   15.30    2.90
  -2   9   4   11.50    3.30
   1  -9  -4    9.20    3.00
   1  -9  -4   11.90    4.60
  -1   9   4    5.40    3.00
   0  -9  -4   67.19   10.50
   0  -9  -4   55.79    6.30
   0   9   4   68.49    5.50
  -1  -9  -4   12.20    6.10
  -1  -9  -4    4.40    4.10
  -2  -9  -4   -0.10    4.90
  -2  -9  -4   24.40    5.10
   2   9   4   14.90    2.90
   2   9   4    8.90    5.00
  -3  -9  -4    9.10    6.20
  -3  -9  -4   25.20    8.30
   3   9   4   16.10    4.80
  -4  -9  -4    7.00    6.30
  -4  -9  -4    5.10    6.30
   4   9   4    3.10    5.00
  -5  -9  -4   57.99   13.70
   5   9   4   46.80    9.20
   5   9   4   48.60   13.70
  -6  -9  -4    4.70    9.90
   6   9   4   14.50    7.90
   6   9   4    7.10    8.40
  -7  -9  -4   42.40   14.90
   7   9   4   46.40   11.80
   7   9   4   44.60   12.90
  -8  -9  -4    3.60   14.30
   8   9   4    7.80   10.80
  15 -10  -4   73.39   17.20
  15 -10  -4   85.89   19.60
  14 -10  -4  114.19   28.70
  13 -10  -4  168.88   28.80
 -13  10   4  141.19   22.30
  12 -10  -4   10.60    8.90
  12 -10  -4   18.70    9.80
 -12  10   4   12.30   17.10
  11 -10  -4  131.69   17.50
  11 -10  -4  151.88   17.10
 -11  10   4  134.39   19.30
  10 -10  -4   92.69   13.40
  10 -10  -4  106.69   16.10
 -10  10   4  108.29   16.20
   9 -10  -4  162.28   15.20
   9 -10  -4   77.59   14.30
  -9  10   4  130.29   16.10
   8 -10  -4    9.90    6.10
   8 -10  -4   -0.50    5.00
  -8  10   4    5.60    6.30
   7 -10  -4  226.98   14.40
   7 -10  -4  207.18   18.50
  -7  10   4  202.28   16.00
   6 -10  -4  121.29   13.60
   6 -10  -4  104.89    9.90
  -6  10   4   91.79   10.70
   5 -10  -4  223.68   18.20
   5 -10  -4  203.78   15.40
   5 -10  -4  217.98   12.40
   5 -10  -4  207.38   16.70
  -5  10   4  214.98   13.40
   4 -10  -4   38.20    7.10
   4 -10  -4   25.90    6.30
   4 -10  -4   39.40    6.40
   4 -10  -4   32.20    9.00
  -4  10   4   36.60    6.50
   3 -10  -4  101.49    7.60
   3 -10  -4  134.09   13.60
   3 -10  -4  111.79    9.00
   3 -10  -4  130.79    8.00
  -3  10   4  127.29    8.00
   2 -10  -4  120.79    6.40
   2 -10  -4  117.59    7.90
   2 -10  -4  143.49   14.00
  -2  10   4  122.49    5.20
   1 -10  -4  244.98   18.70
   0 -10  -4   58.49   10.70
  -1 -10  -4   95.79   12.70
   1  10   4   63.89    5.60
  -2 -10  -4  290.17   21.90
   2  10   4  283.97   12.30
  -3 -10  -4  312.37   23.80
   3  10   4  312.67   14.30
  -4 -10  -4   13.40    8.30
   4  10   4   -0.60    6.90
  -5 -10  -4  123.79   20.30
   5  10   4  186.78   14.90
  -6 -10  -4  191.58   25.80
   6  10   4  230.08   28.90
  14 -11  -4   32.80   15.90
 -14  11   4   22.70   16.10
  13 -11  -4   22.50   12.10
  13 -11  -4   40.80   13.00
 -13  11   4   36.00   14.30
  12 -11  -4  106.69   16.70
  12 -11  -4  114.59   19.60
 -12  11   4  123.19   19.30
  11 -11  -4   27.80   10.20
  11 -11  -4   31.80   11.50
 -11  11   4   33.30   11.90
  10 -11  -4   14.10    8.30
  10 -11  -4   18.80    8.70
 -10  11   4   31.90   10.70
   9 -11  -4   15.90    7.70
   9 -11  -4   11.00    7.50
  -9  11   4   15.90    9.50
   8 -11  -4   12.10    6.30
   8 -11  -4    7.00    7.60
  -8  11   4   10.70    8.10
   7 -11  -4   49.10    8.60
   7 -11  -4   67.29   13.50
  -7  11   4   74.29   12.00
   6 -11  -4   35.50    7.10
   6 -11  -4   33.40    9.20
   6 -11  -4   43.20   10.90
  -6  11   4   21.30    7.00
   5 -11  -4   13.40    7.00
   5 -11  -4   15.60    5.10
   5 -11  -4   16.10    9.00
   5 -11  -4   19.60    7.70
  -5  11   4   15.70    5.80
   4 -11  -4   24.00    7.10
   4 -11  -4   31.30    5.80
   4 -11  -4   25.10    7.90
   4 -11  -4   27.20    6.70
  -4  11   4   22.00    5.30
   3 -11  -4   89.29   13.00
   2 -11  -4   97.29   13.80
   1 -11  -4   58.89   11.40
   0 -11  -4   67.79   12.30
  -1 -11  -4    4.60    7.30
  -2 -11  -4  -10.20    7.00
  -3 -11  -4    5.40    9.20
  -4 -11  -4   49.99   13.60
  -5 -11  -4   -1.90   11.30
  14 -12  -4    2.10   14.70
 -14  12   4  -35.30   13.30
  13 -12  -4   14.60   13.70
 -13  12   4   31.10   16.40
  12 -12  -4   17.10   12.20
  12 -12  -4   12.50   11.50
 -12  12   4   -3.80   13.00
  11 -12  -4   12.10    9.00
  11 -12  -4   15.80    9.60
 -11  12   4   38.40   12.90
  10 -12  -4   41.70    9.70
  10 -12  -4   36.00   11.00
 -10  12   4   39.10   11.60
   9 -12  -4   16.10   10.30
   9 -12  -4   16.90    8.00
  -9  12   4    8.90    9.10
   8 -12  -4  264.07   22.70
   8 -12  -4  229.98   17.00
  -8  12   4  232.48   19.60
   7 -12  -4  250.87   22.00
   7 -12  -4  237.58   15.50
  -7  12   4  248.38   18.10
   6 -12  -4   53.79   12.70
   6 -12  -4   48.30    8.80
  -6  12   4   47.40    9.40
   5 -12  -4  160.68   17.90
   5 -12  -4  158.18    9.30
   5 -12  -4  142.09   12.00
   5 -12  -4  147.49   19.60
   4 -12  -4  569.44   19.70
   4 -12  -4  719.63   35.20
   3 -12  -4  203.88   19.50
   2 -12  -4    2.80    6.70
   1 -12  -4  105.49   16.50
   0 -12  -4  206.48   19.80
  -1 -12  -4   55.09   12.70
  -2 -12  -4   11.80   10.60
  -3 -12  -4   -1.30   11.80
  -5 -12  -4   -4.20   13.80
  13 -13  -4  -22.10   12.80
 -13  13   4   10.20   15.00
  12 -13  -4   12.80   12.70
  12 -13  -4   27.70   13.50
 -12  13   4    1.00   14.30
  11 -13  -4   27.10   17.70
 -11  13   4   28.20   13.10
  10 -13  -4   12.10   10.70
  10 -13  -4    7.80   17.60
 -10  13   4   17.20   12.10
   9 -13  -4    3.10   10.00
  -9  13   4   -4.60    9.50
   8 -13  -4    6.70   10.90
   8 -13  -4   14.80    9.70
  -8  13   4   15.10    9.10
   7 -13  -4   82.89   11.30
   7 -13  -4   97.39   17.60
  -7  13   4  108.89   14.10
   6 -13  -4   19.90   10.10
   6 -13  -4   13.60    6.10
  -6  13   4   28.40    8.20
   5 -13  -4   18.20    9.30
  -5  13   4    5.90    9.90
   4 -13  -4   10.10    7.40
   3 -13  -4   -8.70    6.90
   2 -13  -4   74.39   15.00
   1 -13  -4   56.89   14.10
   0 -13  -4   -0.60    9.40
  -1 -13  -4   91.19   18.10
  -2 -13  -4   41.60   15.40
  12 -14  -4   37.30   20.20
 -12  14   4   93.09   20.20
  11 -14  -4  115.99   19.70
 -11  14   4  109.69   21.70
  10 -14  -4  101.29   19.60
  10 -14  -4   73.29   18.30
 -10  14   4  110.59   20.90
   9 -14  -4    2.50   11.40
  -9  14   4   15.30   12.00
   8 -14  -4   17.50   11.30
  -8  14   4   34.40   11.70
   7 -14  -4  120.49   18.60
  -7  14   4  101.89   15.30
   6 -14  -4  178.98   20.80
   5 -14  -4   70.69   15.40
   4 -14  -4   14.40    9.80
   3 -14  -4  126.49   18.50
   2 -14  -4  163.18   22.30
   1 -14  -4   66.79   16.20
   0 -14  -4    8.70   11.60
  -2 -14  -4   62.99   18.90
   8 -15  -4   11.30   11.80
   7 -15  -4    3.50   12.70
   5 -15  -4  -30.00    9.10
   4 -15  -4  -19.60    9.50
   3 -15  -4    0.30   12.50
   2 -15  -4   -8.50   11.10
   1 -15  -4   -0.20   22.20
   2 -16   5   57.19   20.20
   3 -16   5   82.69   17.60
  -4  16  -5   27.40   15.40
   4 -16   5    9.70   13.70
  -5  16  -5    5.10   15.00
   5 -16   5    4.80   17.30
  -6  16  -5    6.00   14.50
   6 -16   5    5.90   12.00
  -7  16  -5    9.50   18.70
   7 -16   5   39.50   15.00
  -8  16  -5   -9.10   15.90
   8 -16   5    6.00   14.00
  -9  16  -5   17.00   18.50
   9 -16   5   36.30   14.30
   0 -15   5   -6.20   13.70
  -1  15  -5    8.20   13.00
   1 -15   5    0.70   11.30
  -2  15  -5    0.80   12.40
   2 -15   5   14.60   16.00
  -3  15  -5   55.49   14.80
   3 -15   5   28.60   11.90
  -4  15  -5   67.89   15.70
   4 -15   5   92.59   17.10
  -5  15  -5  129.59   21.10
  -6  15  -5   -6.70   12.90
   6 -15   5    6.90    9.40
  -7  15  -5  109.19   22.10
  -8  15  -5  180.28   36.70
   8 -15   5  161.78   21.90
  -9  15  -5   22.70   17.90
   9 -15   5   48.40   15.70
 -10  15  -5   16.10   16.00
  10 -15   5   34.90   13.30
 -11  15  -5  104.59   23.60
  11 -15   5  131.29   25.20
   2  14  -5   -2.40   13.60
   1  14  -5    6.30   12.90
  -1 -14   5   25.60   11.60
   0  14  -5   39.80   13.20
  -1  14  -5   51.49   13.80
   1 -14   5   37.80   19.40
  -2  14  -5   -0.20    9.60
   2 -14   5   -9.70    7.70
  -3  14  -5   31.80   11.20
   3 -14   5   49.70   11.40
  -4  14  -5  109.29   18.30
   4 -14   5  114.99   16.00
  -5  14  -5   67.59   15.60
   5 -14   5   85.49   15.00
  -6  14  -5    7.60   11.30
   6 -14   5   -1.80    8.00
  -7  14  -5   37.00   15.20
   7 -14   5   46.70   11.30
  -8  14  -5    6.50   12.10
   8 -14   5   -0.10    9.30
  -9  14  -5  -10.70   12.80
   9 -14   5   -3.80    9.20
   9 -14   5   22.80   12.30
 -10  14  -5   -1.30   12.70
  10 -14   5   -8.60    9.70
  10 -14   5   -7.30   11.60
 -11  14  -5   -1.70   14.90
  11 -14   5   13.40   14.60
  11 -14   5   -1.60   12.60
 -12  14  -5   19.00   16.40
  12 -14   5    9.20   13.10
  12 -14   5   22.60   16.00
   4  13  -5   11.00   15.10
   3  13  -5   20.40   13.50
  -3 -13   5   15.60   12.20
   2  13  -5   98.99   19.50
   1  13  -5    7.00   10.70
   0  13  -5    2.00   10.00
  -1  13  -5   86.79   16.20
   1 -13   5   85.29   12.30
  -2  13  -5  247.18   21.40
   2 -13   5  230.88   17.60
  -3  13  -5   45.80   11.10
   3 -13   5   58.19   11.70
  -4  13  -5   15.80    9.00
   4 -13   5   -3.00    6.30
  -5  13  -5   90.69   16.60
   5 -13   5  118.09   14.00
  -6  13  -5  134.09   18.20
   6 -13   5  181.98   17.40
  -7  13  -5  123.19   18.90
   7 -13   5  112.19   15.20
   7 -13   5  108.39    9.80
  -8  13  -5    9.30   10.90
   8 -13   5   -1.20    7.10
  -9  13  -5  188.78   23.30
   9 -13   5  148.49   18.80
 -10  13  -5  226.68   27.10
  10 -13   5  201.68   21.80
 -11  13  -5   68.59   17.90
  11 -13   5   56.19   14.80
  11 -13   5   76.19   14.20
  12 -13   5  -11.80   10.60
  12 -13   5   -6.60   12.20
  13 -13   5   46.70   17.10
   6  12  -5  137.09   26.60
   5  12  -5  147.59   24.50
  -5 -12   5  129.29   22.40
   4  12  -5    5.80   11.70
   3  12  -5   47.50   13.60
   2  12  -5   60.69   13.90
   1  12  -5   50.29   11.40
  -1 -12   5   61.49   10.60
   0  12  -5   -5.20    8.10
   1 -12   5   94.89   11.90
  -2  12  -5   47.90   13.20
   2 -12   5   52.79    9.60
  -3  12  -5   31.70   10.60
   3 -12   5   21.80    7.80
  -4  12  -5    3.50    7.10
   4 -12   5   16.60    7.00
  -5  12  -5    0.00    7.70
   5 -12   5   10.70    5.40
  -6  12  -5    0.20    7.80
   6 -12   5    8.50    6.20
   6 -12   5    9.90    3.90
  -7  12  -5    5.20    7.90
   7 -12   5   11.90    9.10
   7 -12   5   13.60    4.70
   7 -12   5    0.60    5.60
  -8  12  -5   40.60   12.90
   8 -12   5   49.90   11.30
   8 -12   5   50.69    8.40
  -9  12  -5   -2.30    9.00
   9 -12   5    5.50    7.30
 -10  12  -5   45.40   13.80
 -11  12  -5  -11.10   11.30
  11 -12   5   -6.60    8.40
  11 -12   5   -1.10    9.60
 -12  12  -5   23.10   14.30
  12 -12   5   22.20   11.10
  12 -12   5   20.70   12.70
 -13  12  -5   14.00   15.10
  13 -12   5   -0.10   11.50
  14 -12   5   27.50   16.20
  14 -12   5    3.10   13.90
   7  11  -5   44.20   17.70
   6  11  -5    4.80   13.60
   5  11  -5   11.10   12.70
   4  11  -5  102.09   17.80
   3  11  -5   52.89   12.60
  -3 -11   5   62.19   11.90
   2  11  -5   24.90   10.10
  -2 -11   5   29.90    6.70
   1  11  -5  501.35   28.10
  -1 -11   5  496.85   22.80
   0  11  -5  672.33   32.70
   0 -11   5  658.13   26.40
  -1  11  -5  168.98   17.20
   1 -11   5  180.58   12.90
  -2  11  -5   44.20   11.40
   2 -11   5   42.70    8.40
  -3  11  -5  650.63   32.40
   3 -11   5  602.64   26.40
   4 -11   5  531.15   24.90
  -5  11  -5   67.19   12.90
   5 -11   5   58.99    4.70
   5 -11   5   64.09    5.60
   5 -11   5   60.29    9.70
  -6  11  -5   23.30    9.20
   6 -11   5   33.50    6.70
   6 -11   5   35.50    6.20
   6 -11   5   28.50    8.00
  -7  11  -5  143.49   17.50
   7 -11   5  172.78   12.10
   7 -11   5  144.59   14.90
  -8  11  -5  215.88   21.30
   8 -11   5  233.38   15.60
   8 -11   5  226.28   19.20
  -9  11  -5   29.00   12.30
   9 -11   5   35.30   10.50
   9 -11   5   26.10    7.60
 -10  11  -5   10.20   10.30
  10 -11   5    5.70    7.90
  10 -11   5    6.90    7.70
 -11  11  -5   -1.20    9.40
  11 -11   5    4.30    9.40
  11 -11   5    2.00    8.00
 -12  11  -5  103.09   21.50
  12 -11   5  131.69   18.00
  12 -11   5   82.69   15.90
 -13  11  -5   52.59   17.00
  13 -11   5   60.89   14.90
  14 -11   5    5.50   13.90
   7  10  -5  113.19   21.60
   6  10  -5   10.10    6.50
   6  10  -5    9.80   11.80
   5  10  -5   21.50    5.40
   5  10  -5    7.30    9.80
   4  10  -5  185.38   19.40
   4  10  -5  125.29    4.20
  -4 -10   5  193.38   15.30
   3  10  -5  117.99   15.90
  -3 -10   5  159.48   13.70
   2  10  -5  237.18   18.80
  -2 -10   5  231.28   14.80
   1  10  -5   63.49   11.60
  -1 -10   5   83.29    9.00
   0  10  -5  215.18   17.70
   0 -10   5  196.58   12.70
  -1  10  -5  191.28   16.20
   1 -10   5  179.28   12.40
  -2  10  -5  181.88   15.90
   2 -10   5  133.09   11.10
  -3  10  -5   44.00    9.70
   3 -10   5   36.50    6.60
  -4  10  -5   31.10    8.90
   4 -10   5   24.90    6.30
   4 -10   5   30.80    2.90
   5 -10   5    9.60    5.70
   5 -10   5    3.50    4.00
   5 -10   5    5.90    3.50
  -6  10  -5    4.40    5.60
   6 -10   5   -1.70    5.40
   6 -10   5    0.10    4.80
   6 -10   5   -0.20    3.70
  -7  10  -5  121.79   15.70
   7 -10   5  116.49   13.20
   7 -10   5  129.19   11.00
  -8  10  -5   50.79   12.70
   8 -10   5   56.69    9.40
   8 -10   5   48.30   11.00
  -9  10  -5   37.90   11.00
   9 -10   5   26.70    7.50
   9 -10   5   30.10    8.30
 -10  10  -5    0.20    8.40
  10 -10   5   -7.80    5.50
  10 -10   5    6.40    6.70
 -11  10  -5   88.09   20.20
  11 -10   5   84.19   14.60
  11 -10   5   79.79   16.80
 -12  10  -5   28.60   13.00
  12 -10   5   21.10   11.50
  12 -10   5   40.00   10.80
 -13  10  -5   -1.60   13.50
  13 -10   5   30.20   11.80
 -14  10  -5   52.19   16.80
  15 -10   5  -10.70   17.10
   9   9  -5   27.90   11.90
   9   9  -5   47.50   17.40
   8   9  -5  -13.30   12.50
   8   9  -5    4.60    8.60
   7   9  -5   44.40   13.30
   7   9  -5   45.70    9.20
   6   9  -5   19.30    6.50
   6   9  -5   -3.30    7.80
   5   9  -5    8.10    8.60
  -5  -9   5   13.30    6.40
   4   9  -5   31.30    9.50
   4   9  -5   40.70    5.90
  -4  -9   5   59.09    9.80
   3   9  -5   77.59   12.80
   3   9  -5   71.79    4.40
  -3  -9   5   80.29    9.20
   2   9  -5   19.80    7.50
  -2  -9   5   11.30    4.40
   1   9  -5   14.30    6.20
   1   9  -5   26.20    6.20
  -1  -9   5   19.60    5.00
   0   9  -5  162.78   14.70
   0   9  -5  130.69    9.80
   0  -9   5  150.18   10.30
  -1   9  -5   14.30    4.80
  -1   9  -5   43.30    9.00
   1  -9   5   19.90    5.00
  -2   9  -5   52.49   10.10
   2  -9   5   62.59    7.30
  -3   9  -5    0.20    4.90
   3  -9   5    4.40    3.20
  -4   9  -5  129.49   14.20
   4  -9   5  140.19    7.40
   4  -9   5  135.49    7.90
   4  -9   5  140.49   11.60
  -5   9  -5  205.68   18.00
   5  -9   5  167.88   11.60
   5  -9   5  210.18   11.00
   5  -9   5  194.68   14.00
  -6   9  -5  415.16   30.80
   6  -9   5  447.86   19.00
   6  -9   5  414.56   22.40
   6  -9   5  392.36   20.40
  -7   9  -5  394.46   26.50
   7  -9   5  376.86   22.20
   7  -9   5  401.96   19.80
  -8   9  -5   39.60   10.40
   8  -9   5   37.00    9.20
   8  -9   5   28.90    7.20
  -9   9  -5   77.59   14.70
   9  -9   5   72.69   11.90
   9  -9   5   65.99   10.60
 -10   9  -5  117.99   16.80
  10  -9   5  135.39   16.80
  10  -9   5  116.19   14.70
 -11   9  -5  193.98   21.20
  11  -9   5  205.48   18.70
  11  -9   5  244.38   22.10
 -12   9  -5   10.90   11.40
  12  -9   5   14.90   10.10
  12  -9   5    9.40    9.30
 -13   9  -5  104.99   21.20
  13  -9   5   96.39   19.00
  13  -9   5   90.59   18.60
 -14   9  -5  150.28   24.10
  14  -9   5  158.08   23.20
  14  -9   5  148.79   23.30
 -15   9  -5   92.79   23.90
  15  -9   5  208.88   28.10
  10   8  -5  242.98   30.80
  10   8  -5  261.57   23.40
  10   8  -5  264.17   25.20
   9   8  -5   69.89   31.50
   9   8  -5  116.49   18.50
   8   8  -5  -11.00    7.60
   8   8  -5    1.30    9.50
   7   8  -5   46.60    9.50
   7   8  -5   39.40   11.60
   6   8  -5  130.09   17.00
   6   8  -5  127.19   12.00
   5   8  -5   16.60    4.60
   5   8  -5   17.00    7.60
  -5  -8   5   32.70    8.30
   4   8  -5   55.99    6.30
   4   8  -5   46.20   10.20
  -4  -8   5   40.90    7.80
   3   8  -5    9.20    3.70
   3   8  -5    7.00    5.90
   3   8  -5    7.90    2.90
   3   8  -5   12.60    4.30
  -3  -8   5    7.70    4.60
   2   8  -5   10.40    1.80
   2   8  -5   13.30    2.80
   2   8  -5   15.90    5.90
  -2  -8   5   13.00    3.90
   1   8  -5  215.48   11.50
   1   8  -5  231.78   16.40
  -1  -8   5  217.58   11.60
   0   8  -5   30.10    5.10
   0   8  -5   46.20    9.30
   0  -8   5   42.00    5.30
  -1   8  -5   17.50    5.80
  -1   8  -5   12.80    4.10
   1  -8   5   16.40    3.90
  -2   8  -5  193.38   11.70
  -2   8  -5  183.78   14.50
   2  -8   5  175.38   10.80
  -3   8  -5  263.77   14.50
  -3   8  -5  282.17   18.70
   3  -8   5  268.97    9.60
   3  -8   5  277.07   14.60
   3  -8   5  278.97   10.00
  -4   8  -5   30.20    8.20
   4  -8   5   27.90    5.30
   4  -8   5   31.00    6.10
  -5   8  -5  147.09   15.10
  -5   8  -5  173.68   12.00
   5  -8   5  163.78   12.40
   5  -8   5  133.49   10.60
  -6   8  -5  101.29   10.70
  -6   8  -5  102.59   12.70
   6  -8   5   92.19   10.30
   6  -8   5  101.39   11.30
  -7   8  -5   68.29   10.00
  -7   8  -5   83.49   11.90
   7  -8   5   64.69   10.40
  -8   8  -5   -8.30    4.30
  -8   8  -5    5.20    6.30
   8  -8   5    2.60    4.60
   8  -8   5   -0.30    4.10
  -9   8  -5   15.60    8.20
  -9   8  -5    9.10    8.00
   9  -8   5   34.60    7.80
   9  -8   5   13.90    6.60
 -10   8  -5   36.20   13.60
  10  -8   5   30.10    9.20
  10  -8   5   36.10    9.60
 -11   8  -5   26.00   11.70
  11  -8   5   36.10   10.50
  11  -8   5   58.09   12.10
 -12   8  -5   22.60   11.80
  12  -8   5   21.50    9.80
  12  -8   5   23.20    9.90
 -13   8  -5   14.60   14.30
  13  -8   5   43.30   12.50
  13  -8   5   24.50   11.50
 -14   8  -5   15.50   13.70
  14  -8   5   42.40   13.50
  14  -8   5    3.70   10.70
 -15   8  -5   51.89   30.00
  15  -8   5   44.50   15.60
  11   7  -5   18.70   12.60
  11   7  -5   -5.60   22.40
  11   7  -5   41.10   17.60
  10   7  -5   63.29   13.30
  10   7  -5   44.70   15.60
  10   7  -5   66.99   13.60
   9   7  -5   65.79   14.90
   9   7  -5   86.49   14.80
   8   7  -5    9.60    7.20
   8   7  -5   19.80   10.20
   7   7  -5   -1.10    5.80
   7   7  -5    7.60    7.40
   6   7  -5   17.80    7.10
   6   7  -5   15.70    6.10
   5   7  -5  187.38   12.30
  -5  -7   5  170.98   13.60
   4   7  -5   56.29    6.50
   4   7  -5   65.99   10.10
   4   7  -5   51.69    7.00
   4   7  -5   46.90    8.30
  -4  -7   5   76.59    8.60
   3   7  -5    1.80    3.40
   3   7  -5    1.10    4.00
   3   7  -5   -1.20    3.80
   3   7  -5   -1.50    3.10
  -3  -7   5    2.70    2.90
   2   7  -5   97.69    7.20
   2   7  -5  104.69    5.80
   2   7  -5   99.49    6.40
   2   7  -5  103.49   11.00
  -2  -7   5  111.89    7.90
   1   7  -5  247.98    6.20
   1   7  -5  247.18   11.20
   1   7  -5  241.78    6.00
   1   7  -5  245.78   15.90
  -1  -7   5  269.87   11.80
  -1  -7   5  258.97   15.20
   0   7  -5   15.80    5.30
   0   7  -5   28.10    4.30
   0  -7   5   23.20    3.50
   0  -7   5   37.00    6.70
  -1   7  -5    2.00    2.50
  -1   7  -5    3.20    3.60
   1  -7   5    4.80    4.60
   1  -7   5    1.70    2.40
  -2   7  -5   13.00    2.50
  -2   7  -5   14.20    4.70
  -2   7  -5   17.90    4.10
   2  -7   5   11.20    3.30
   2  -7   5   20.10    6.50
  -3   7  -5  720.03   25.00
  -3   7  -5  752.92   23.20
  -3   7  -5  771.12   31.50
   3  -7   5  759.32   26.00
   3  -7   5  751.42   21.90
  -4   7  -5  930.51   30.20
  -4   7  -5  863.51   35.40
  -4   7  -5  966.70   30.10
   4  -7   5  901.81   28.10
   4  -7   5  864.71   30.50
  -5   7  -5  756.12   33.20
  -5   7  -5  700.13   27.30
   5  -7   5  681.13   25.90
   5  -7   5  741.43   28.00
  -6   7  -5  269.67   17.20
  -6   7  -5  241.88   18.80
   6  -7   5  277.27   16.70
  -7   7  -5 1190.38   65.39
  -7   7  -5 1208.08   44.30
   7  -7   5 1166.78   42.10
  -8   7  -5  669.03   32.80
  -8   7  -5  637.54   34.50
   8  -7   5  648.04   30.40
  -9   7  -5  298.87   22.70
  -9   7  -5  304.17   23.80
   9  -7   5  282.47   20.40
 -10   7  -5   11.50    8.10
 -10   7  -5   24.40   10.60
  10  -7   5   21.90    8.30
 -11   7  -5  557.14   36.00
  11  -7   5  523.05   31.30
  11  -7   5  517.45   31.30
 -12   7  -5  449.46   50.69
  12  -7   5  479.15   49.50
  12  -7   5  453.15   31.00
 -13   7  -5   66.19   17.60
  13  -7   5   27.80   11.60
  13  -7   5   35.10   11.40
  14  -7   5  -12.30   10.80
  12   6  -5   33.90   14.30
  12   6  -5  122.59   24.50
  12   6  -5   44.70   16.00
  11   6  -5  157.58   26.00
  11   6  -5  198.88   25.30
  11   6  -5  174.08   21.60
  10   6  -5    3.90    9.10
  10   6  -5   35.30   21.00
  10   6  -5    5.70    8.70
   9   6  -5   73.79   12.70
   9   6  -5   81.29   16.10
   8   6  -5   69.79   14.00
   8   6  -5   40.70    8.20
   7   6  -5  191.48   14.80
   7   6  -5  239.78   19.80
   6   6  -5    5.60    4.20
   6   6  -5    1.50    5.80
   5   6  -5  242.38   14.00
   5   6  -5  221.08   12.90
   5   6  -5  255.87   18.20
   4   6  -5  135.39   12.60
   4   6  -5  144.49    9.60
   4   6  -5  114.89   12.50
   4   6  -5  124.19    8.90
  -4  -6   5  135.19   10.30
   3   6  -5  210.28   10.50
   3   6  -5  218.88   10.60
   3   6  -5  225.28   12.20
   3   6  -5  239.78   15.70
  -3  -6   5  221.08   11.60
   2   6  -5  209.98   10.20
   2   6  -5  224.48    9.90
   2   6  -5  214.68   14.60
   2   6  -5  226.68    9.40
  -2  -6   5  228.08   10.50
  -2  -6   5  228.58   13.60
   1   6  -5  121.69    6.80
   1   6  -5  120.19    5.90
   1   6  -5  122.99    5.40
   1   6  -5  126.19   14.30
  -1  -6   5  120.39    6.60
  -1  -6   5  123.19    9.70
   0   6  -5   70.59    3.10
   0   6  -5   72.19    8.00
   0   6  -5   70.79    3.40
   0   6  -5   67.19    5.10
   0  -6   5   68.09    5.00
   0  -6   5   59.69    7.40
  -1   6  -5   35.40    6.10
  -1   6  -5   23.40    3.70
  -1   6  -5   31.70    2.60
   1  -6   5   34.30    2.30
   1  -6   5   37.00    4.10
   1  -6   5   27.20    6.10
  -2   6  -5   66.79    6.00
  -2   6  -5   79.69    5.40
  -2   6  -5   76.09    8.60
   2  -6   5   79.89    4.90
   2  -6   5   70.69    8.80
   2  -6   5   72.69    6.10
  -3   6  -5  293.77   17.40
  -3   6  -5  267.27   12.90
  -3   6  -5  289.87   12.70
   3  -6   5  277.67   12.00
   3  -6   5  254.67   16.20
   3  -6   5  286.17   13.60
  -4   6  -5   37.60    7.00
  -4   6  -5   38.20    5.60
   4  -6   5   32.70    5.10
   4  -6   5   33.00    5.80
  -5   6  -5    6.20    4.60
  -5   6  -5    8.30    3.30
   5  -6   5   10.10    4.50
   5  -6   5   15.20    4.70
  -6   6  -5   43.90    7.90
  -6   6  -5   36.60    7.00
   6  -6   5   22.20    5.30
  -7   6  -5   13.20    7.00
  -7   6  -5    6.60    5.10
   7  -6   5    8.90    4.60
  -8   6  -5   49.50    9.90
  -8   6  -5   65.49   11.70
   8  -6   5   78.29    9.90
  -9   6  -5   -4.40    4.40
  -9   6  -5    9.40    6.80
   9  -6   5    5.90    4.70
 -10   6  -5   13.10    7.10
 -10   6  -5    5.20    7.40
  10  -6   5   -4.90    4.00
 -11   6  -5   27.80   10.40
 -11   6  -5   23.20    8.50
  11  -6   5   32.10    8.50
 -12   6  -5   36.10   12.40
  12  -6   5   31.40   12.00
  12  -6   5   46.50   12.90
 -13   6  -5   52.69   16.70
  13  -6   5   37.80   13.30
 -14   6  -5    4.90   11.70
  14  -6   5   16.10   10.30
  14  -6   5    1.90    9.20
  15  -6   5   17.00   14.00
  12   5  -5   41.50   15.00
  12   5  -5   32.20   14.50
  11   5  -5   53.69   14.60
  11   5  -5  107.89   17.30
  10   5  -5    4.20    9.40
  10   5  -5   -2.20    7.30
  10   5  -5   14.60    8.00
   9   5  -5   12.10    7.80
   9   5  -5    0.50    6.90
   9   5  -5    4.70    5.60
   8   5  -5   28.70    7.60
   8   5  -5   39.10   10.50
   7   5  -5  150.98   13.00
   7   5  -5  155.38   15.50
   6   5  -5  361.06   25.00
   6   5  -5  382.76   19.50
   5   5  -5  178.98   14.10
   5   5  -5  173.68   13.00
   5   5  -5  156.98   13.70
   5   5  -5  202.98   12.40
   4   5  -5   26.00    4.90
   4   5  -5   22.70    4.80
   4   5  -5   29.00    6.70
   4   5  -5   18.20    6.20
  -4  -5   5   20.70    4.80
   3   5  -5  550.74   27.50
   3   5  -5  562.34   20.90
   3   5  -5  562.44   23.90
   3   5  -5  542.55   17.60
   3   5  -5  556.24   19.00
  -3  -5   5  556.04   19.00
   2   5  -5 1273.37   32.60
   2   5  -5 1307.87   40.50
   2   5  -5 1265.97   31.50
   2   5  -5 1307.17   34.70
  -2  -5   5 1236.08   32.40
  -2  -5   5 1274.07   37.80
   1   5  -5  327.77   10.80
   1   5  -5  331.97   10.80
   1   5  -5  322.87   16.60
  -1  -5   5  326.97   10.80
   0   5  -5  373.16   17.70
   0   5  -5  387.06   12.10
   0   5  -5  389.56   11.30
   0  -5   5  383.56   12.00
   0  -5   5  378.36   10.90
   0  -5   5  330.47   16.20
  -1   5  -5 1933.11   45.10
  -1   5  -5 1880.11   52.89
  -1   5  -5 1872.91   43.80
   1  -5   5 1899.01   45.10
   1  -5   5 1923.61   43.10
   1  -5   5 1846.52   51.59
  -2   5  -5 7086.69  153.08
  -2   5  -5 7160.48  162.38
  -2   5  -5 6971.40  153.08
   2  -5   5 6928.11  153.58
   2  -5   5 6999.00  151.88
   2  -5   5 7406.36  167.58
  -3   5  -5 2684.03   69.59
   3  -5   5 2442.86   67.59
   3  -5   5 2498.25   61.19
   3  -5   5 2504.65   61.89
  -4   5  -5   30.30    5.30
  -4   5  -5   28.00    6.80
   4  -5   5   29.60    6.90
   4  -5   5   33.50    5.60
   4  -5   5   24.20    4.50
  -5   5  -5  550.44   23.70
  -5   5  -5  530.45   26.00
   5  -5   5  522.25   22.60
   5  -5   5  522.85   21.90
  -6   5  -5 4032.80  105.79
  -6   5  -5 3925.11  102.39
   6  -5   5 4008.40   99.49
  -7   5  -5  805.42   34.90
  -7   5  -5  816.62   36.50
   7  -5   5  802.42   32.20
  -8   5  -5   34.90   10.40
  -8   5  -5   15.80    8.00
   8  -5   5   23.10    7.10
  -9   5  -5   13.80    6.30
  -9   5  -5   18.90    6.70
   9  -5   5   19.90    6.90
 -10   5  -5  713.93   38.90
 -10   5  -5  680.13   37.50
  10  -5   5  660.93   33.70
 -11   5  -5  258.47   24.70
 -11   5  -5  228.98   22.50
  11  -5   5  221.78   20.20
 -12   5  -5   -0.60    7.60
 -12   5  -5    3.20    8.80
  12  -5   5    3.80    6.40
  12  -5   5    0.00    8.60
 -13   5  -5   13.80   10.10
  13  -5   5    5.80    8.30
  13  -5   5   -6.90    8.40
 -14   5  -5  243.18   27.20
  14  -5   5  153.98   23.30
  14  -5   5  192.78   24.00
 -15   5  -5   92.49   26.50
  15  -5   5   81.29   17.60
  13   4  -5  -10.70   11.70
  12   4  -5    0.30    9.70
  12   4  -5   13.50   10.50
  12   4  -5   11.20   11.70
  11   4  -5  167.18   20.30
  11   4  -5  153.58   18.00
  10   4  -5   95.99   15.90
  10   4  -5  114.59   14.30
  10   4  -5   94.59   14.40
   9   4  -5    3.90    5.20
   9   4  -5   -9.30    5.70
   9   4  -5    4.40    5.80
   8   4  -5   18.90    7.50
   8   4  -5   22.50    7.00
   7   4  -5  285.77   19.80
   7   4  -5  277.57   18.00
   6   4  -5  544.25   24.00
   6   4  -5  616.64   27.80
   6   4  -5  567.44   32.60
   5   4  -5  296.17   15.20
   5   4  -5  274.67   17.30
   5   4  -5  291.17   17.40
   5   4  -5  285.97   14.00
   4   4  -5  314.47   14.60
   4   4  -5  322.07   13.10
   4   4  -5  326.47   17.40
   4   4  -5  324.47   19.10
   3   4  -5  103.69    7.10
   3   4  -5   91.59    8.90
   3   4  -5  109.39    8.50
   3   4  -5   93.69    5.90
   3   4  -5   95.19    9.30
  -3  -4   5  106.09    6.70
   2   4  -5 1596.24   45.50
   2   4  -5 1626.44   39.70
   2   4  -5 1544.05   36.70
  -2  -4   5 1626.14   39.70
  -2  -4   5 1588.44   37.80
   1   4  -5  360.16   16.60
   1   4  -5  373.56   10.20
   1   4  -5  376.16   12.10
  -1  -4   5  365.16   10.30
  -1  -4   5  369.26   15.70
  -1  -4   5  374.56   12.00
   0   4  -5  361.26   11.30
   0   4  -5  326.87   15.70
   0  -4   5  359.06   10.20
   0  -4   5  363.36   15.50
   0  -4   5  344.97   10.90
  -1   4  -5    2.60    2.90
  -1   4  -5    1.80    1.50
   1  -4   5    2.10    2.70
   1  -4   5    2.00    1.40
   1  -4   5    1.80    1.30
  -2   4  -5  593.74   23.30
  -2   4  -5  609.14   19.40
   2  -4   5  595.44   18.60
   2  -4   5  604.64   18.60
   2  -4   5  555.74   22.50
  -3   4  -5   -0.50    1.80
  -3   4  -5    0.60    2.60
   3  -4   5    0.60    3.40
   3  -4   5    2.50    2.20
   3  -4   5    1.60    1.60
  -4   4  -5    3.90    2.90
  -4   4  -5    2.50    2.60
   4  -4   5    2.40    2.20
   4  -4   5    2.20    3.20
   4  -4   5    2.30    2.80
  -5   4  -5  197.48   13.70
  -5   4  -5  184.68   14.50
   5  -4   5  195.68   12.20
   5  -4   5  218.78   14.00
  -6   4  -5   57.19    8.50
  -6   4  -5   56.79    8.60
   6  -4   5   54.09    7.30
  -7   4  -5    1.60    3.30
  -7   4  -5    2.70    3.70
   7  -4   5   -4.90    2.30
  -8   4  -5   12.20    5.90
  -8   4  -5    1.50    5.40
   8  -4   5    1.80    3.50
  -9   4  -5  354.96   24.80
  -9   4  -5  318.27   24.40
   9  -4   5  349.47   22.00
 -10   4  -5   74.89   16.50
 -10   4  -5   37.70    9.70
  10  -4   5   35.80    8.80
 -11   4  -5   63.19   15.00
 -11   4  -5   62.19   13.70
  11  -4   5   46.50   10.50
 -12   4  -5   17.40    9.10
 -12   4  -5   29.60   12.10
  12  -4   5   18.00    7.80
 -13   4  -5   -7.00    8.80
  13  -4   5   -5.30    7.40
  13  -4   5   -1.70    8.00
 -14   4  -5   -2.70   11.80
  14  -4   5   18.20   10.20
  15  -4   5    6.40   13.00
  14   3  -5   33.70   17.70
  13   3  -5   29.00   12.90
  13   3  -5   21.30   11.60
  13   3  -5    3.60   13.10
  12   3  -5   51.79   13.00
  12   3  -5   28.90   10.60
  12   3  -5   53.19   14.50
  11   3  -5   36.50   10.50
  11   3  -5   45.30   13.10
  11   3  -5   45.20   11.10
  10   3  -5   33.50    8.50
  10   3  -5   65.49   12.80
  10   3  -5   66.59   13.60
   9   3  -5    5.50    5.30
   9   3  -5   11.00    5.30
   9   3  -5    6.80    6.50
   8   3  -5  435.96   23.70
   8   3  -5  439.86   21.40
   8   3  -5  420.76   25.10
   7   3  -5  301.87   23.10
   7   3  -5  297.47   18.40
   6   3  -5    9.20    4.40
   6   3  -5   11.60    4.00
   6   3  -5    1.50    3.20
   5   3  -5  112.29    8.80
   5   3  -5  114.59    9.30
   5   3  -5  104.49   10.50
   5   3  -5  119.39   10.60
   4   3  -5  746.93   23.00
   4   3  -5  736.83   28.40
   4   3  -5  725.13   27.30
   4   3  -5  782.12   25.40
   3   3  -5  248.48   13.00
   3   3  -5  234.18   13.50
   3   3  -5  247.28   13.40
   3   3  -5  249.08   11.50
   3   3  -5  250.77    9.60
   2   3  -5  289.87   14.00
   2   3  -5  305.67    9.10
   2   3  -5  274.67   11.20
  -2  -3   5  282.57   13.20
  -2  -3   5  302.07   11.60
   1   3  -5  530.25   19.90
   1   3  -5  550.94   16.20
  -1  -3   5  557.64   16.20
  -1  -3   5  553.44   19.30
   0   3  -5 1692.33   40.20
   0   3  -5 1720.13   45.80
   0  -3   5 1736.83   40.10
   0  -3   5 1722.03   37.10
   0  -3   5 1673.33   44.60
  -1   3  -5 4466.15   98.89
  -1   3  -5 4517.95  104.19
   1  -3   5 4473.15   98.39
   1  -3   5 4557.74  103.59
   1  -3   5 4494.35   96.69
  -2   3  -5  397.56   17.80
  -2   3  -5  436.76   15.90
   2  -3   5  435.36   15.30
   2  -3   5  420.86   15.50
   2  -3   5  418.16   17.70
  -3   3  -5 2759.02   70.29
  -3   3  -5 2660.93   66.89
   3  -3   5 2727.63   69.79
   3  -3   5 2650.33   66.69
   3  -3   5 2710.73   66.29
  -4   3  -5 1938.41   53.09
  -4   3  -5 1943.51   55.29
   4  -3   5 1807.52   51.49
   4  -3   5 1917.41   57.09
   4  -3   5 1860.01   54.29
  -5   3  -5 2464.45   67.59
  -5   3  -5 2448.66   68.09
   5  -3   5 2363.66   67.89
   5  -3   5 2393.66   66.19
  -6   3  -5  308.87   19.20
  -6   3  -5  336.67   20.10
  -7   3  -5  761.22   34.60
  -7   3  -5  799.12   34.80
  -8   3  -5   80.69   12.30
  -8   3  -5   82.89   12.50
  -9   3  -5  354.66   24.90
  -9   3  -5  340.47   25.50
   9  -3   5  360.76   22.00
 -10   3  -5    6.00    6.70
 -10   3  -5    3.90    6.70
  10  -3   5   11.80    6.60
 -11   3  -5   58.09   13.40
 -11   3  -5   79.59   14.50
  11  -3   5   60.69   12.10
 -12   3  -5    6.60    7.40
  12  -3   5   -4.20    7.50
 -13   3  -5  168.48   23.10
  13  -3   5  113.99   20.20
  13  -3   5  178.08   22.00
  14  -3   5   30.70   12.30
  14  -3   5   38.00   12.90
  15  -3   5    3.80   14.80
  15  -3   5   14.80   28.90
  14   2  -5   19.60   14.40
  14   2  -5   -0.70   13.30
  13   2  -5   21.00   11.90
  13   2  -5   -3.60   10.00
  13   2  -5   -8.90    9.30
  12   2  -5  425.36   29.70
  12   2  -5  457.15   28.40
  12   2  -5  383.76   29.90
  11   2  -5   63.49   12.10
  11   2  -5   34.80   10.10
  11   2  -5   45.80   13.10
  10   2  -5   95.99   14.40
  10   2  -5   78.59   13.40
  10   2  -5   96.59   12.00
   9   2  -5  398.06   24.20
   9   2  -5  397.06   24.70
   8   2  -5 1118.29   42.60
   8   2  -5 1129.89   38.50
   8   2  -5 1122.99   42.10
   7   2  -5  237.18   16.30
   7   2  -5  228.68   16.40
   7   2  -5  252.67   14.70
   6   2  -5   61.49    7.80
   6   2  -5   76.69    8.20
   6   2  -5   78.89    9.00
   6   2  -5   65.19    6.70
   5   2  -5   46.10    5.40
   5   2  -5   47.40    6.20
   5   2  -5   59.49    7.60
   5   2  -5   41.40    7.90
   5   2  -5   48.20    6.20
   4   2  -5   36.10    5.20
   4   2  -5   43.10    4.20
   4   2  -5   39.60    6.50
   4   2  -5   42.30    5.90
   4   2  -5   42.20    5.00
   4   2  -5   44.60    6.50
   3   2  -5  322.17   11.50
   3   2  -5  286.87   10.30
   3   2  -5  301.07   15.00
   3   2  -5  316.27   13.20
   3   2  -5  302.57   14.30
  -3  -2   5  311.57   13.10
   2   2  -5    3.50    1.80
   2   2  -5    4.10    1.20
   2   2  -5    4.70    1.40
   2   2  -5    4.50    2.80
  -2  -2   5    1.90    1.50
  -2  -2   5   -0.30    1.70
   1   2  -5   74.59    6.30
   1   2  -5   66.99    4.70
  -1  -2   5   82.29    6.00
  -1  -2   5   76.19    4.90
   0   2  -5   70.89    4.80
   0   2  -5   50.79    5.30
   0  -2   5   56.69    5.30
   0  -2   5   67.39    2.90
   0  -2   5   55.09    4.20
  -1   2  -5  313.07   13.90
  -1   2  -5  320.37   12.20
  -1   2  -5  336.67   11.60
   1  -2   5  328.47   13.90
   1  -2   5  332.37   11.10
   1  -2   5  327.67   12.00
  -2   2  -5  192.28   10.00
   2  -2   5  174.38    9.40
   2  -2   5  194.78    9.60
   2  -2   5  186.88   10.70
  -3   2  -5    1.10    2.40
  -3   2  -5   -0.30    1.60
   3  -2   5   -0.80    1.50
   3  -2   5   -0.90    2.00
   3  -2   5    0.80    2.10
  -4   2  -5   -1.40    1.70
  -4   2  -5    3.00    2.60
  -5   2  -5    2.20    2.80
  -5   2  -5    0.10    2.20
   5  -2   5    2.70    3.70
   5  -2   5    0.40    3.20
   5  -2   5    4.80    4.70
  -6   2  -5   85.29   10.20
  -6   2  -5  102.09   11.40
  -7   2  -5  143.79   13.90
  -7   2  -5  139.69   13.90
  -8   2  -5   41.30   10.80
  -9   2  -5   52.49   11.80
  -9   2  -5   40.00   10.70
 -10   2  -5   83.89   15.40
 -10   2  -5   69.19   12.90
 -11   2  -5    3.70    8.80
 -11   2  -5    8.10    7.10
  11  -2   5    2.50    6.00
 -12   2  -5   17.40   11.10
 -12   2  -5   49.90   14.20
  12  -2   5   40.10   13.40
 -13   2  -5  157.08   22.50
  13  -2   5  152.68   21.30
  13  -2   5  160.48   21.70
 -14   2  -5   51.39   17.20
  14  -2   5   29.80   12.20
  14  -2   5   26.70   11.60
  15  -2   5   13.60   13.00
  14   1  -5   14.20   15.00
  14   1  -5    3.40   11.30
  14   1  -5   -9.70   11.00
  13   1  -5   -7.20    8.40
  13   1  -5   22.10   12.80
  13   1  -5   17.50   11.60
  12   1  -5   34.10   10.90
  12   1  -5   24.30    9.30
  12   1  -5    7.00   10.60
  11   1  -5  113.79   13.80
  11   1  -5  139.09   17.40
  11   1  -5  122.59   16.70
 -11  -1   5  121.49   17.90
  10   1  -5   88.09   12.10
  10   1  -5   99.79   13.60
 -10  -1   5   92.79   14.50
   9   1  -5  115.49   13.40
   9   1  -5  147.89   15.00
  -9  -1   5  138.39   15.10
   8   1  -5   56.99    8.20
   8   1  -5   46.40    9.00
  -8  -1   5   62.19    9.90
   7   1  -5 1096.19   39.00
   7   1  -5 1136.49   36.60
  -7  -1   5 1105.89   41.90
   6   1  -5  470.95   19.30
   6   1  -5  479.55   21.60
   6   1  -5  461.15   21.10
  -6  -1   5  456.05   23.00
   5   1  -5  123.79   11.00
   5   1  -5  104.09   10.40
   5   1  -5  143.79   10.20
   5   1  -5  121.99    8.20
  -5  -1   5  124.09   10.60
   4   1  -5  579.34   21.00
   4   1  -5  556.14   22.80
   4   1  -5  569.54   21.50
   4   1  -5  604.24   18.90
  -4  -1   5  575.44   21.10
   3   1  -5 2608.84   64.19
   3   1  -5 2642.14   59.99
   3   1  -5 2649.53   63.49
   3   1  -5 2629.54   65.79
  -3  -1   5 2664.23   63.49
   2   1  -5 2862.51   62.89
   2   1  -5 2933.41   66.79
  -2  -1   5 2861.11   66.49
  -2  -1   5 2901.11   62.79
  -2  -1   5 2865.21   67.19
   1   1  -5   12.90    3.10
   1   1  -5    7.50    2.10
   1   1  -5   11.10    1.40
  -1  -1   5   10.80    1.50
  -1  -1   5    9.10    2.60
  -1  -1   5    8.40    2.00
   0   1  -5  104.39    6.20
   0   1  -5  107.49    4.90
   0   1  -5  107.59    6.80
   0  -1   5  103.49    6.50
   0  -1   5  106.19    4.70
   0  -1   5   97.89    5.80
  -1   1  -5 1462.25   36.30
  -1   1  -5 1515.25   38.60
  -1   1  -5 1452.65   37.40
   1  -1   5 1464.45   37.20
   1  -1   5 1478.25   38.20
   1  -1   5 1440.36   35.70
  -2   1  -5  360.36   14.50
  -2   1  -5  355.96   15.10
  -2   1  -5  359.06   16.90
   2  -1   5  357.36   14.90
   2  -1   5  354.36   14.50
   2  -1   5  352.26   13.80
  -3   1  -5   28.30    4.50
  -3   1  -5   13.30    3.40
  -3   1  -5   24.90    5.60
   3  -1   5   20.90    4.50
   3  -1   5   12.30    4.20
  -4   1  -5 1275.47   39.70
  -4   1  -5 1285.37   40.40
  -4   1  -5 1273.17   40.30
   4  -1   5 1264.07   39.70
  -5   1  -5  827.82   32.90
  -5   1  -5  902.81   33.90
  -5   1  -5  910.11   32.70
   5  -1   5  865.61   32.30
   5  -1   5  858.11   35.80
  -6   1  -5  146.89   12.70
  -6   1  -5  163.38   14.10
  -7   1  -5   76.69   11.00
  -7   1  -5   86.49   10.90
  -8   1  -5  215.28   18.80
  -9   1  -5  292.07   22.30
  -9   1  -5  285.47   23.30
 -10   1  -5  480.65   32.80
 -10   1  -5  412.86   28.10
 -11   1  -5   43.80   12.00
 -11   1  -5   56.19   14.80
 -12   1  -5   12.10   11.80
 -12   1  -5    2.30    7.90
  12  -1   5    8.10    8.30
 -13   1  -5  131.79   21.80
  13  -1   5  159.08   22.80
  13  -1   5  127.89   20.90
 -14   1  -5  195.18   28.30
  14  -1   5  311.37   29.10
  14  -1   5  217.48   27.20
  15   0  -5  -25.00   13.30
  15   0  -5   -2.50   14.00
  14   0  -5   46.40   16.20
  14   0  -5   39.30   13.30
  14   0  -5   44.50   15.30
  13   0  -5  370.06   35.10
  13   0  -5  441.96   31.10
  13   0  -5  386.66   30.10
 -13   0   5  369.96   31.80
  12   0  -5   26.80    9.60
  12   0  -5   50.49   12.50
 -12   0   5   64.59   25.10
  11   0  -5    5.80    6.90
  11   0  -5   -0.50    5.80
 -11   0   5    0.50    6.60
  10   0  -5   64.19   10.90
  10   0  -5   76.29   11.70
 -10   0   5   91.89   13.20
   9   0  -5  767.32   34.00
   9   0  -5  842.22   36.30
  -9   0   5  877.51   39.20
   8   0  -5   96.89   10.00
  -8   0   5   81.39   11.40
   7   0  -5   25.60    5.90
   7   0  -5   18.60    5.90
  -7   0   5   20.60    6.20
   6   0  -5  218.68   14.00
   6   0  -5  234.08   14.50
  -6   0   5  240.98   15.80
   5   0  -5  838.02   26.90
   5   0  -5  895.21   29.70
   5   0  -5  822.22   31.70
   5   0  -5  841.42   31.20
  -5   0   5  856.61   30.90
   4   0  -5   55.69    5.00
   4   0  -5   48.90    6.70
   4   0  -5   61.99    6.30
  -4   0   5   43.30    6.10
  -4   0   5   68.59    6.60
   3   0  -5   21.60    4.70
   3   0  -5   13.70    2.60
   3   0  -5   12.40    3.00
   3   0  -5   13.70    3.20
  -3   0   5   21.30    3.80
  -3   0   5   20.50    3.90
  -3   0   5   17.40    3.00
   2   0  -5  518.95   16.80
   2   0  -5  486.05   14.70
   2   0  -5  509.05   17.20
   2   0  -5  493.45   16.40
  -2   0   5  497.75   14.80
  -2   0   5  488.05   16.50
   1   0  -5   79.79    5.50
   1   0  -5   82.09    4.60
   1   0  -5   91.59    5.60
  -1   0   5   89.79    5.60
  -1   0   5   89.39    4.80
  -1   0   5   85.79    5.30
   0   0  -5    7.50    2.50
   0   0  -5   11.80    2.90
   0   0  -5    9.50    2.10
   0   0   5   13.00    2.60
   0   0   5   12.50    2.50
   0   0   5   12.90    3.00
  -1   0  -5  118.39    6.90
  -1   0  -5  115.09    6.80
  -1   0  -5  108.19    7.10
   1   0   5  125.09    7.30
   1   0   5  133.69    7.20
   1   0   5  126.99    6.90
  -2   0  -5   72.09    6.50
  -2   0  -5   66.29    5.70
  -2   0  -5   70.09    6.00
   2   0   5   62.19    5.70
   2   0   5   73.09    6.00
   2   0   5   66.89    5.80
  -3   0  -5  274.57   13.50
  -3   0  -5  252.07   13.70
  -3   0  -5  265.17   13.70
   3   0   5  273.57   13.40
   3   0   5  264.37   13.60
   3   0   5  253.37   12.90
  -4   0  -5   13.90    4.30
  -4   0  -5   12.40    3.50
  -4   0  -5    7.90    3.60
   4   0   5   11.20    4.50
   4   0   5    5.20    4.00
  -5   0  -5   34.30    6.60
  -5   0  -5   39.20    6.90
  -5   0  -5   34.60    6.10
   5   0   5   33.00    7.10
  -6   0  -5   34.40    7.40
  -6   0  -5   49.90    8.80
  -6   0  -5   52.09    8.20
  -7   0  -5   74.69   10.20
  -7   0  -5   53.79    9.40
  -8   0  -5    2.60    5.30
  -9   0  -5    8.90    4.90
  -9   0  -5    7.30    6.00
 -10   0  -5   -1.00    5.80
 -10   0  -5    5.80    6.70
 -11   0  -5   -1.70    7.30
 -11   0  -5   -9.30    7.20
 -12   0  -5  111.09   22.00
 -13   0  -5    5.30   11.00
  13   0   5    0.70   10.60
  13   0   5    1.20    9.60
 -14   0  -5    9.20   13.60
  14   0   5   -9.10   14.10
  15  -1  -5   27.00   17.40
  15  -1  -5  -16.10   12.70
  15  -1  -5   10.60   13.90
  14  -1  -5   16.90   11.80
  14  -1  -5    5.10   11.70
 -14   1   5   24.50   13.60
  13  -1  -5  156.98   21.20
  13  -1  -5  145.59   20.10
 -13   1   5  128.59   20.80
  12  -1  -5   67.79   13.30
  12  -1  -5   38.70    8.70
 -12   1   5   50.69   12.80
  11  -1  -5   75.39   13.10
  11  -1  -5   34.10   10.00
 -11   1   5   81.59   14.90
  10  -1  -5   85.79   12.40
  10  -1  -5   82.69   11.30
 -10   1   5  116.69   14.60
   9  -1  -5  434.36   25.00
  -9   1   5  482.45   27.80
   8  -1  -5  508.25   24.00
   8  -1  -5  496.85   28.20
  -8   1   5  524.25   38.10
   7  -1  -5    0.30    3.20
   7  -1  -5    6.60    3.10
  -7   1   5   10.30    4.90
   6  -1  -5   69.09    7.20
   6  -1  -5   87.39    8.90
  -6   1   5   80.09    9.20
   5  -1  -5 1989.80   56.19
   5  -1  -5 2035.30   52.29
  -5   1   5 1958.70   53.69
  -5   1   5 1953.70   51.29
  -5   1   5 2001.90   55.79
   4  -1  -5 3398.56   79.29
   4  -1  -5 3329.97   82.49
   4  -1  -5 3343.87   80.79
  -4   1   5 3432.26   82.39
  -4   1   5 3430.46   78.99
  -4   1   5 3329.77   80.59
   3  -1  -5  237.48   11.30
   3  -1  -5  250.97   12.10
   3  -1  -5  227.48   10.50
  -3   1   5  276.77   14.20
  -3   1   5  230.28   11.10
  -3   1   5  239.58   10.50
   2  -1  -5 1840.52   44.90
   2  -1  -5 1800.52   45.60
   2  -1  -5 1937.81   45.80
   2  -1  -5 1831.12   44.20
  -2   1   5 1889.91   45.00
  -2   1   5 1868.21   45.80
   1  -1  -5 2702.93   63.99
   1  -1  -5 2798.22   61.79
   1  -1  -5 2765.82   63.39
  -1   1   5 2818.92   61.39
  -1   1   5 2791.82   63.69
  -1   1   5 2766.32   63.29
   0  -1  -5 8876.81  189.08
   0  -1  -5 8769.62  189.58
   0  -1  -5 8936.11  186.48
   0   1   5 8742.23  188.78
   0   1   5 9047.79  186.18
   0   1   5 8884.21  189.38
  -1  -1  -5 1722.83   41.10
  -1  -1  -5 1683.03   44.00
   1   1   5 1732.23   43.40
   1   1   5 1767.02   41.10
   1   1   5 1722.93   43.60
  -2  -1  -5  141.19    7.90
  -2  -1  -5  134.29    9.00
   2   1   5  123.69    8.50
   2   1   5  154.98    8.40
  -3  -1  -5  764.52   27.30
  -3  -1  -5  768.52   27.10
   3   1   5  748.33   28.10
   3   1   5  750.42   26.30
   3   1   5  777.92   25.20
  -4  -1  -5 7393.86  168.28
  -4  -1  -5 7460.25  164.68
  -4  -1  -5 7369.96  167.98
   4   1   5 7318.27  164.78
   4   1   5 7111.09  165.18
   4   1   5 7232.58  166.38
  -5  -1  -5 1320.97   45.10
  -5  -1  -5 1348.67   41.60
  -5  -1  -5 1296.67   44.50
   5   1   5 1260.27   45.30
  -6  -1  -5    0.60    2.90
  -6  -1  -5    3.40    3.80
  -6  -1  -5   -0.40    3.00
  -7  -1  -5   -4.10    3.90
  -7  -1  -5    4.30    4.90
  -7  -1  -5   -3.30    4.00
  -8  -1  -5 2057.89   70.59
  -9  -1  -5  956.80   41.70
  -9  -1  -5  832.32   43.20
 -10  -1  -5   53.09   14.30
 -10  -1  -5   44.60   10.90
 -11  -1  -5   31.80   11.20
 -11  -1  -5   29.80   10.90
 -12  -1  -5  223.78   25.00
 -12  -1  -5  326.07   32.20
  12   1   5  303.97   26.80
 -13  -1  -5  127.79   24.10
  13   1   5  214.38   24.60
  13   1   5  197.78   24.80
  15  -2  -5   36.00   13.30
  15  -2  -5   22.10   15.30
  14  -2  -5    0.00   10.20
  14  -2  -5   -7.00    9.50
 -14   2   5   10.20    9.50
  13  -2  -5  265.77   24.50
  13  -2  -5  217.18   24.00
 -13   2   5  265.37   27.10
  12  -2  -5   81.69   15.20
  12  -2  -5  107.59   15.70
 -12   2   5   78.89   15.60
  11  -2  -5   33.20    9.30
  11  -2  -5    5.80    6.20
 -11   2   5   18.90    7.20
  10  -2  -5   55.99   11.60
  10  -2  -5   61.59   10.00
 -10   2   5   41.10   10.30
   9  -2  -5  314.27   20.10
   9  -2  -5  282.07   19.40
  -9   2   5  323.87   22.80
   8  -2  -5   26.00    6.30
   8  -2  -5   28.60    6.90
  -8   2   5   28.70    8.10
   7  -2  -5   11.20    4.10
   7  -2  -5   11.60    3.40
  -7   2   5    3.30    3.30
   6  -2  -5    8.70    3.40
   6  -2  -5    8.20    4.00
  -6   2   5    8.70    4.20
  -6   2   5   10.50    3.80
   5  -2  -5   45.90    5.80
   5  -2  -5   46.30    5.90
   5  -2  -5   41.00    6.70
  -5   2   5   42.50    6.10
  -5   2   5   43.20    5.60
  -5   2   5   44.20    6.40
   4  -2  -5   81.09    7.50
   4  -2  -5   69.79    6.60
   4  -2  -5   71.59    6.50
  -4   2   5   73.69    7.00
  -4   2   5   81.49    7.10
  -4   2   5   69.59    6.60
   3  -2  -5  386.16   15.20
   3  -2  -5  389.16   15.20
   3  -2  -5  387.66   15.20
  -3   2   5  388.76   15.10
  -3   2   5  376.16   14.80
  -3   2   5  356.26   14.60
   2  -2  -5  248.98   11.20
   2  -2  -5  233.28    9.90
   2  -2  -5  250.47   11.20
  -2   2   5  253.57   11.00
  -2   2   5  255.57    9.90
  -2   2   5  255.07   11.30
   1  -2  -5   30.70    4.60
   1  -2  -5   23.00    3.50
   1  -2  -5   22.40    2.30
  -1   2   5   26.30    3.60
  -1   2   5   26.70    3.60
   0  -2  -5    5.30    1.30
   0  -2  -5    3.70    1.90
   0  -2  -5    5.10    2.30
   0   2   5    3.10    0.90
   0   2   5    1.50    1.40
  -1  -2  -5   31.40    4.20
  -1  -2  -5   27.60    2.70
   1   2   5   26.60    4.10
   1   2   5   22.10    3.90
  -2  -2  -5   35.60    3.90
  -2  -2  -5   40.10    5.00
  -2  -2  -5   37.40    4.90
   2   2   5   39.20    4.10
   2   2   5   37.10    5.00
   2   2   5   49.10    5.90
  -3  -2  -5   13.00    3.70
  -3  -2  -5   14.50    4.50
  -3  -2  -5   11.10    2.90
   3   2   5   15.50    4.20
   3   2   5   18.50    5.10
  -4  -2  -5   28.40    5.50
  -4  -2  -5   26.70    5.70
  -4  -2  -5   31.70    6.10
   4   2   5   23.80    6.20
   4   2   5   19.30    4.90
  -5  -2  -5   59.69    9.10
  -5  -2  -5   62.99    7.70
  -5  -2  -5   57.79    8.70
   5   2   5   56.39    8.00
  -6  -2  -5   14.70    5.00
  -6  -2  -5   12.10    6.50
  -6  -2  -5    8.50    5.40
  -7  -2  -5   17.80    6.20
  -7  -2  -5   16.80    7.50
  -7  -2  -5   13.50    7.00
  -8  -2  -5  143.69   16.50
  -8  -2  -5  152.58   15.10
  -8  -2  -5  137.69   16.40
  -9  -2  -5   39.50   10.50
  -9  -2  -5   67.49   13.30
 -10  -2  -5   -7.20    6.60
 -10  -2  -5    2.70    8.30
 -11  -2  -5    4.50   11.40
 -11  -2  -5    3.00    9.50
 -12  -2  -5   51.49   14.50
  12   2   5   71.69   18.60
 -13  -2  -5   17.10   16.60
  13   2   5   42.50   15.40
  15  -3  -5   -2.20   12.60
  14  -3  -5   39.20   13.20
  14  -3  -5   44.40   13.50
 -14   3   5   27.30   13.00
  13  -3  -5    0.90   10.80
  13  -3  -5   21.60    9.00
 -13   3   5    0.70    8.20
  12  -3  -5    6.40    6.60
  12  -3  -5   -4.70    6.10
 -12   3   5    3.20    7.80
  11  -3  -5    0.00    6.00
  11  -3  -5    9.90    7.60
 -11   3   5   13.60    8.30
  10  -3  -5  213.58   17.70
  10  -3  -5  188.08   16.60
 -10   3   5  207.48   18.90
   9  -3  -5   99.99   11.10
   9  -3  -5   88.69   11.10
  -9   3   5   98.49   12.90
   8  -3  -5   56.09    8.50
   8  -3  -5   62.99    8.80
  -8   3   5   49.30    8.90
   7  -3  -5   79.49    9.00
   7  -3  -5   74.69    9.00
  -7   3   5   62.69    9.00
   6  -3  -5  756.32   28.40
   6  -3  -5  762.42   28.60
  -6   3   5  786.12   30.20
   5  -3  -5   63.79    6.90
   5  -3  -5   70.69    8.70
   5  -3  -5   61.69    7.10
  -5   3   5   75.29    7.70
  -5   3   5   72.39    7.80
  -5   3   5   81.29    8.20
   4  -3  -5   93.39    7.50
   4  -3  -5  109.09    8.60
   4  -3  -5  105.19    8.70
  -4   3   5   96.39    8.10
  -4   3   5  113.69    8.60
  -4   3   5   98.49    7.80
   3  -3  -5    9.90    2.80
   3  -3  -5   15.70    3.30
   3  -3  -5   17.90    3.90
  -3   3   5   12.50    3.10
  -3   3   5   13.90    3.00
  -3   3   5   13.40    3.10
   2  -3  -5  865.41   23.80
   2  -3  -5  868.11   27.10
  -2   3   5  899.81   23.50
  -2   3   5  916.01   25.90
   1  -3  -5 2734.73   64.59
   1  -3  -5 2750.92   58.49
   1  -3  -5 2720.63   66.39
   1  -3  -5 2783.22   58.99
  -1   3   5 2762.02   64.09
  -1   3   5 2742.53   67.69
   0  -3  -5   25.60    4.50
   0  -3  -5   24.10    3.90
   0   3   5   32.50    4.10
   0   3   5   21.30    4.60
  -1  -3  -5 1180.68   26.80
  -1  -3  -5 1169.78   33.60
  -1  -3  -5 1150.28   34.80
   1   3   5 1157.88   32.70
   1   3   5 1168.88   27.20
  -2  -3  -5 2533.15   56.99
  -2  -3  -5 2437.96   63.09
  -2  -3  -5 2444.56   63.99
   2   3   5 2392.56   62.89
   2   3   5 2440.06   57.49
   2   3   5 2536.75   62.49
  -3  -3  -5 3217.88   81.49
  -3  -3  -5 3222.28   82.19
  -3  -3  -5 3210.38   75.39
   3   3   5 3153.98   79.69
   3   3   5 3233.58   76.39
  -4  -3  -5  121.49    9.20
  -4  -3  -5  140.49   11.70
  -4  -3  -5  114.19   10.80
   4   3   5  110.09    9.60
  -5  -3  -5 1419.56   48.10
  -5  -3  -5 1378.86   42.70
  -5  -3  -5 1360.96   47.60
   5   3   5 1408.56   44.00
  -6  -3  -5  442.36   25.20
  -6  -3  -5  411.06   21.30
  -7  -3  -5 1114.49   47.10
  -7  -3  -5 1210.88   43.30
  -7  -3  -5 1145.99   47.30
  -8  -3  -5   16.40    8.50
  -8  -3  -5    9.00    6.70
  -8  -3  -5   -3.90    6.30
  -9  -3  -5  136.19   15.60
  -9  -3  -5  109.09   17.80
 -10  -3  -5   -4.10    6.90
 -10  -3  -5   -0.80    8.70
 -11  -3  -5   73.09   15.90
 -11  -3  -5   81.69   18.30
 -12  -3  -5   31.40   14.40
  12   3   5   28.30   13.10
  13   3   5    0.60   13.70
  13   3   5   22.60   14.70
  15  -4  -5    7.00   11.60
 -15   4   5   -1.40   11.80
  14  -4  -5  220.28   24.80
  14  -4  -5  235.08   24.30
 -14   4   5  256.97   28.60
  13  -4  -5  151.98   29.10
  13  -4  -5  166.68   21.10
 -13   4   5  179.18   24.40
  12  -4  -5   13.00    7.40
  12  -4  -5   10.10    7.70
 -12   4   5   11.00    8.80
  11  -4  -5   53.39   11.40
  11  -4  -5   62.99   12.30
 -11   4   5   54.39   13.80
  10  -4  -5  405.46   24.80
  10  -4  -5  370.26   23.80
 -10   4   5  341.37   24.70
   9  -4  -5  161.98   14.50
   9  -4  -5  146.69   13.70
  -9   4   5  173.18   16.50
   8  -4  -5   63.89    9.50
   8  -4  -5   89.89   10.60
  -8   4   5   72.39   10.70
   7  -4  -5  493.05   22.50
   7  -4  -5  418.06   21.80
  -7   4   5  439.76   23.30
   6  -4  -5  298.37   16.30
   6  -4  -5  287.07   16.50
  -6   4   5  271.87   16.40
   5  -4  -5  550.04   23.10
   5  -4  -5  553.04   23.50
   5  -4  -5  569.64   22.30
  -5   4   5  573.34   22.40
  -5   4   5  531.25   22.30
   4  -4  -5  123.79    8.60
   4  -4  -5  123.59    9.40
  -4   4   5  120.49    8.70
  -4   4   5  119.29    9.10
  -4   4   5  120.89   14.60
   3  -4  -5  115.69    7.90
   3  -4  -5  137.79    9.80
   3  -4  -5  137.29    8.60
  -3   4   5  140.99    8.00
  -3   4   5  131.59    8.40
   2  -4  -5  233.38   10.90
   2  -4  -5  221.68    9.00
   2  -4  -5  211.28   12.00
  -2   4   5  227.98   12.40
  -2   4   5  216.88   10.40
  -2   4   5  215.08    8.30
   1  -4  -5  516.35   19.80
  -1   4   5  478.55   19.20
  -1   4   5  492.85   16.80
   0  -4  -5  147.99    9.90
   0   4   5  132.39    9.20
   0   4   5  129.59    7.80
  -1  -4  -5   -0.90    1.70
  -1  -4  -5    2.60    2.00
   1   4   5    1.20    2.50
   1   4   5    0.20    0.70
   1   4   5    0.80    1.00
   1   4   5    4.20    2.20
  -2  -4  -5  363.66   18.00
  -2  -4  -5  364.36   17.00
   2   4   5  375.06   11.90
   2   4   5  366.86   16.30
   2   4   5  360.06   12.90
  -3  -4  -5    7.10    3.80
  -3  -4  -5    7.70    3.40
  -3  -4  -5    7.10    2.70
   3   4   5    6.50    3.90
   3   4   5    1.70    2.70
  -4  -4  -5    6.90    4.20
  -4  -4  -5   18.00    3.90
  -4  -4  -5   20.70    5.50
   4   4   5   12.60    4.60
  -5  -4  -5   28.40    5.90
  -5  -4  -5   23.80    7.30
  -5  -4  -5   29.10    6.80
   5   4   5   29.80    7.10
  -6  -4  -5   19.50    7.30
  -6  -4  -5    6.90    4.20
  -6  -4  -5    2.50    5.00
  -7  -4  -5  116.99   12.50
  -7  -4  -5  112.29   14.20
  -7  -4  -5  106.99   14.70
  -8  -4  -5   21.20    7.40
  -8  -4  -5   23.00    9.40
  -8  -4  -5   10.00    8.00
  -9  -4  -5   -4.00    6.80
  -9  -4  -5    0.80    7.70
 -10  -4  -5   15.20   11.10
 -10  -4  -5   52.49   12.80
  10   4   5   34.60   10.10
  11   4   5  152.68   21.30
  11   4   5  116.69   18.80
  12   4   5   38.90   14.30
  12   4   5   27.40   13.90
  15  -5  -5   39.50   13.60
 -15   5   5   38.00   15.00
  14  -5  -5    8.60    9.10
  14  -5  -5   -5.60    8.40
 -14   5   5  -14.00    9.50
  13  -5  -5   28.20   10.30
  13  -5  -5   29.10   10.30
 -13   5   5   32.30   12.20
  12  -5  -5   47.40   10.00
  12  -5  -5   38.30   10.40
 -12   5   5   49.60   13.00
  11  -5  -5  360.46   24.40
  11  -5  -5  358.06   24.90
 -11   5   5  318.97   25.60
  10  -5  -5    4.20    5.80
  10  -5  -5    5.80    4.90
 -10   5   5   -0.20    5.30
   9  -5  -5  785.92   34.60
   9  -5  -5  756.62   33.40
  -9   5   5  807.72   37.00
   8  -5  -5  846.32   34.50
   8  -5  -5  851.51   35.60
  -8   5   5  937.01   37.80
   7  -5  -5 1098.59   39.60
   7  -5  -5 1128.29   38.50
  -7   5   5 1060.19   40.00
   6  -5  -5  101.89   17.40
   6  -5  -5  131.09   11.50
   6  -5  -5  105.49    9.80
  -6   5   5  113.89   10.60
   5  -5  -5 1497.05   44.50
   5  -5  -5 1411.56   44.80
   5  -5  -5 1445.16   42.50
  -5   5   5 1418.76   42.40
  -5   5   5 1494.25   43.70
   4  -5  -5  895.71   28.60
   4  -5  -5  911.41   29.60
   4  -5  -5  885.21   31.40
  -4   5   5  937.71   29.00
   3  -5  -5  359.16   17.40
   3  -5  -5  385.16   14.90
   3  -5  -5  363.66   15.10
  -3   5   5  359.86   14.90
  -3   5   5  355.46   20.10
  -3   5   5  392.56   14.30
   2  -5  -5   12.60    3.30
   2  -5  -5   14.30    4.30
   2  -5  -5   13.40    2.70
  -2   5   5   16.80    3.60
  -2   5   5   14.50    2.30
  -2   5   5   15.30    4.50
   1  -5  -5  636.34   23.40
   1  -5  -5  646.24   24.20
  -1   5   5  597.34   19.70
  -1   5   5  600.34   23.60
   0  -5  -5   78.39    6.90
   0  -5  -5   88.29    8.40
   0   5   5   92.49    6.90
  -1  -5  -5    6.70    3.20
  -1  -5  -5    4.50    2.70
   1   5   5    7.60    2.90
  -2  -5  -5    3.60    3.30
  -2  -5  -5    5.90    3.50
   2   5   5    6.20    2.40
   2   5   5    9.00    2.30
   2   5   5    5.70    3.80
  -3  -5  -5  674.73   28.70
  -3  -5  -5  662.53   26.60
   3   5   5  668.53   20.80
   3   5   5  643.54   21.80
   3   5   5  649.64   25.50
  -4  -5  -5  212.58   15.90
  -4  -5  -5  195.88   14.70
   4   5   5  176.08   12.30
   4   5   5  184.68   10.60
  -5  -5  -5   13.80    6.10
  -5  -5  -5   16.00    6.60
   5   5   5    5.20    6.30
   5   5   5   20.30    5.10
  -6  -5  -5   62.59   12.40
  -6  -5  -5   67.59   12.70
   6   5   5   39.30    7.80
  -7  -5  -5  138.79   17.00
  -7  -5  -5  126.59   16.40
   7   5   5  142.89   13.30
  -8  -5  -5  183.58   21.50
  -8  -5  -5  228.78   22.40
   8   5   5  226.08   18.10
  -9  -5  -5    7.00    8.00
  -9  -5  -5   -2.40    8.40
   9   5   5    1.20    7.60
  10   5   5    3.10    9.30
  10   5   5   -7.70   12.20
  11   5   5   21.30   12.90
  15  -6  -5  141.59   22.90
 -15   6   5  119.49   24.50
  14  -6  -5    1.70    9.90
  14  -6  -5   -3.70    9.00
 -14   6   5    6.00   10.80
  13  -6  -5   -5.10    8.90
  13  -6  -5    8.80    9.10
 -13   6   5   11.20    9.30
  12  -6  -5  145.49   17.90
  12  -6  -5  115.99   17.50
 -12   6   5  154.78   18.80
  11  -6  -5  411.66   27.20
  11  -6  -5  395.36   26.80
 -11   6   5  408.56   28.60
  10  -6  -5  206.08   19.10
  10  -6  -5  234.68   19.70
 -10   6   5  274.97   22.30
   9  -6  -5    4.20    4.80
   9  -6  -5    1.90    4.20
  -9   6   5   -0.50    5.00
   8  -6  -5   72.89    9.20
   8  -6  -5   69.69   10.60
  -8   6   5   56.39   10.40
   7  -6  -5  298.87   17.60
  -7   6   5  315.67   19.70
   6  -6  -5  180.38   14.20
   6  -6  -5  216.08   13.50
  -6   6   5  206.98   14.50
   5  -6  -5   28.80    6.30
   5  -6  -5   34.50    5.90
   5  -6  -5   37.50    7.10
  -5   6   5   38.50    6.30
  -5   6   5   40.30    7.00
   4  -6  -5  141.59    9.30
   4  -6  -5  119.39    9.70
   4  -6  -5  134.99   11.40
  -4   6   5  128.29    8.80
   3  -6  -5    3.10    2.80
   3  -6  -5    6.00    2.80
   3  -6  -5    5.10    2.80
  -3   6   5    3.40    2.80
  -3   6   5    8.40    2.60
   2  -6  -5    0.30    1.90
   2  -6  -5   -1.70    2.30
   2  -6  -5    1.20    2.40
  -2   6   5   -1.20    2.40
  -2   6   5    1.20    1.40
   1  -6  -5  261.07   12.40
   1  -6  -5  253.47   15.30
  -1   6   5  268.27   11.80
   0  -6  -5    6.70    3.20
   0  -6  -5    2.40    3.10
   0   6   5    7.00    3.00
  -1  -6  -5   76.79    7.50
  -1  -6  -5   90.09    9.30
   1   6   5   70.89    7.10
  -2  -6  -5    7.20    4.40
  -2  -6  -5   10.90    4.30
   2   6   5   14.90    3.10
   2   6   5   11.30    2.50
   2   6   5    8.20    4.00
  -3  -6  -5  136.39   13.10
  -3  -6  -5  109.29   10.70
   3   6   5  117.49    7.60
   3   6   5  114.99    8.40
   3   6   5  106.79   10.50
  -4  -6  -5   50.19    9.10
  -4  -6  -5   60.19   11.40
   4   6   5   56.49    8.10
   4   6   5   53.79    6.70
  -5  -6  -5   79.29   11.80
  -5  -6  -5   62.79   11.10
   5   6   5   60.49    7.90
  -6  -6  -5   61.29   12.50
  -6  -6  -5   74.79   12.80
   6   6   5   69.79   10.30
  -7  -6  -5   -0.50    7.90
  -7  -6  -5    1.60    6.40
   7   6   5    5.00    6.40
  -8  -6  -5   -0.90    8.10
  -8  -6  -5   -2.00    8.10
   8   6   5   -0.90    8.50
  -9  -6  -5   38.00   13.60
  -9  -6  -5   24.70   12.80
   9   6   5   18.70   10.20
  10   6   5   67.49   14.70
  10   6   5   74.19   16.70
  11   6   5    3.80   12.90
  11   6   5  -11.50   14.50
  15  -7  -5   35.70   15.10
 -15   7   5   49.50   14.70
  14  -7  -5   24.30   12.40
  14  -7  -5   33.00   14.20
 -14   7   5   25.10   13.70
  13  -7  -5    1.20    8.70
  13  -7  -5    1.10    8.00
 -13   7   5    3.50    9.60
  12  -7  -5   13.00    8.60
  12  -7  -5   -4.10    6.50
 -12   7   5   -7.70    7.20
  11  -7  -5  302.27   23.80
  11  -7  -5  309.57   23.30
 -11   7   5  256.47   23.20
  10  -7  -5  310.87   21.90
  10  -7  -5  243.88   20.80
 -10   7   5  296.17   23.00
   9  -7  -5   11.10    5.90
   9  -7  -5   13.20    5.70
  -9   7   5   17.10    7.40
   8  -7  -5    5.90    4.80
   8  -7  -5   11.70    5.60
  -8   7   5   19.00    7.50
   7  -7  -5  547.15   24.70
   7  -7  -5  537.35   27.40
  -7   7   5  563.44   27.00
   6  -7  -5  950.30   33.10
   6  -7  -5  945.41   49.20
  -6   7   5  998.10   35.30
[truncated: 910,445 more chars]
