# Supplementary material for: New Ruthenium Nitrosyl Complexes Combining Potentially Photoactive Nitrosyl Group with the Magnetic Nitroxide Radicals as Ligands
Source: Int J Mol Sci. 2023 Aug 29;24(17):13371. doi: 10.3390/ijms241713371 (PMC10488014; doi:10.3390/ijms241713371)
Supplement: Supplementary file 1 [file ijms-24-13371-s001.zip › 2.cif]

data_pb002
_audit_creation_date               2023-06-09
_audit_creation_method
;
Olex2 1.2
(compiled 2018.05.29 svn.r3508 for OlexSys, GUI svn.r5506)
;
_shelx_SHELXL_version_number       '2016/6'
_audit_contact_author_address      ?
_audit_contact_author_email        ?
_audit_contact_author_name         ''
_audit_contact_author_phone        ?
_publ_contact_author_id_orcid      ?
_publ_section_references
;
Dolomanov, O.V., Bourhis, L.J., Gildea, R.J, Howard, J.A.K. & Puschmann, H.
 (2009), J. Appl. Cryst. 42, 339-341.

Sheldrick, G.M. (2015). Acta Cryst. A71, 3-8.

Sheldrick, G.M. (2015). Acta Cryst. C71, 3-8.
;
_chemical_name_common              ?
_chemical_name_systematic          ?
_chemical_formula_moiety           'C12 H18 Cl4 N4 Na O4 Ru'
_chemical_formula_sum              'C12 H18 Cl4 N4 Na O4 Ru'
_chemical_formula_weight           548.16
_chemical_absolute_configuration   ?
_chemical_melting_point            ?
loop_
  _atom_type_symbol
  _atom_type_description
  _atom_type_scat_dispersion_real
  _atom_type_scat_dispersion_imag
  _atom_type_scat_source
 'C' 'C' 0.0033 0.0016 'International Tables Vol C Tables 4.2.6.8 and 6.1.1.4'
 'H' 'H' 0.0000 0.0000 'International Tables Vol C Tables 4.2.6.8 and 6.1.1.4'
 'Cl' 'Cl' 0.1484 0.1585 'International Tables Vol C Tables 4.2.6.8 and 6.1.1.4'
 'N' 'N' 0.0061 0.0033 'International Tables Vol C Tables 4.2.6.8 and 6.1.1.4'
 'Na' 'Na' 0.0362 0.0249 'International Tables Vol C Tables 4.2.6.8 and 6.1.1.4'
 'O' 'O' 0.0106 0.0060 'International Tables Vol C Tables 4.2.6.8 and 6.1.1.4'
 'Ru' 'Ru' -1.2594 0.8363
 'International Tables Vol C Tables 4.2.6.8 and 6.1.1.4'

_shelx_space_group_comment
;
The symmetry employed for this shelxl refinement is uniquely defined
by the following loop, which should always be used as a source of
symmetry information in preference to the above space-group names.
They are only intended as comments.
;
_space_group_crystal_system        'orthorhombic'
_space_group_IT_number             19
_space_group_name_H-M_alt          'P 21 21 21'
_space_group_name_Hall             'P 2ac 2ab'
loop_
  _space_group_symop_operation_xyz
 'x, y, z'
 '-x+1/2, -y, z+1/2'
 'x+1/2, -y+1/2, -z'
 '-x, y+1/2, -z+1/2'

_cell_length_a                     6.9913(2)
_cell_length_b                     15.1057(3)
_cell_length_c                     18.7215(5)
_cell_angle_alpha                  90
_cell_angle_beta                   90
_cell_angle_gamma                  90
_cell_volume                       1977.15(9)
_cell_formula_units_Z              4
_cell_measurement_reflns_used      9903
_cell_measurement_temperature      150.15
_cell_measurement_theta_max        33.18
_cell_measurement_theta_min        2.56
_shelx_estimated_absorpt_T_max     0.934
_shelx_estimated_absorpt_T_min     0.830
_exptl_absorpt_coefficient_mu      1.381
_exptl_absorpt_correction_T_max    0.7465
_exptl_absorpt_correction_T_min    0.5983
_exptl_absorpt_correction_type     multi-scan
_exptl_absorpt_process_details    
 'SADABS-2016/2 (Bruker,2016/2) was used for absorption correction. wR2(int) was 0.0714 before and 0.0472 after correction. The Ratio of minimum to maximum transmission is 0.8015. The \l/2 correction factor is Not present.'
_exptl_absorpt_special_details     ?
_exptl_crystal_colour              'dark green'
_exptl_crystal_colour_modifier     dark
_exptl_crystal_colour_primary      green
_exptl_crystal_density_diffrn      1.842
_exptl_crystal_density_meas        ?
_exptl_crystal_density_method      ?
_exptl_crystal_description         plate
_exptl_crystal_F_000               1092
_exptl_crystal_size_max            0.14
_exptl_crystal_size_mid            0.12
_exptl_crystal_size_min            0.05
_exptl_transmission_factor_max     ?
_exptl_transmission_factor_min     ?
_diffrn_reflns_av_R_equivalents    0.0388
_diffrn_reflns_av_unetI/netI       0.0426
_diffrn_reflns_Laue_measured_fraction_full  1.000
_diffrn_reflns_Laue_measured_fraction_max  0.998
_diffrn_reflns_limit_h_max         10
_diffrn_reflns_limit_h_min         -10
_diffrn_reflns_limit_k_max         22
_diffrn_reflns_limit_k_min         -23
_diffrn_reflns_limit_l_max         28
_diffrn_reflns_limit_l_min         -28
_diffrn_reflns_number              26074
_diffrn_reflns_point_group_measured_fraction_full  1.000
_diffrn_reflns_point_group_measured_fraction_max  0.998
_diffrn_reflns_theta_full          25.242
_diffrn_reflns_theta_max           33.196
_diffrn_reflns_theta_min           1.732
_diffrn_ambient_temperature        150.15
_diffrn_detector_area_resol_mean   ?
_diffrn_measured_fraction_theta_full  1.000
_diffrn_measured_fraction_theta_max  0.998
_diffrn_measurement_device_type    'Bruker APEX-II CCD'
_diffrn_measurement_method         '\f and \w scans'
_diffrn_radiation_type             MoK\a
_diffrn_radiation_wavelength       0.71073
_diffrn_source                     ?
_diffrn_standards_number           0
_reflns_Friedel_coverage           0.781
_reflns_Friedel_fraction_full      1.000
_reflns_Friedel_fraction_max       0.998
_reflns_number_gt                  6751
_reflns_number_total               7563
_reflns_special_details
;
 Reflections were merged by SHELXL according to the crystal
 class for the calculation of statistics and refinement.
 
 _reflns_Friedel_fraction is defined as the number of unique
 Friedel pairs measured divided by the number that would be
 possible theoretically, ignoring centric projections and
 systematic absences.
;
_reflns_threshold_expression       'I > 2\s(I)'
_computing_cell_refinement         ?
_computing_data_collection         ?
_computing_data_reduction          ?
_computing_molecular_graphics      'Olex2 (Dolomanov et al., 2009)'
_computing_publication_material    'Olex2 (Dolomanov et al., 2009)'
_computing_structure_refinement    'ShelXL (Sheldrick, 2015)'
_computing_structure_solution      'ShelXT (Sheldrick, 2015)'
_refine_diff_density_max           1.293
_refine_diff_density_min           -0.808
_refine_diff_density_rms           0.111
_refine_ls_abs_structure_details
;
 Flack x determined using 2580 quotients [(I+)-(I-)]/[(I+)+(I-)]
 (Parsons, Flack and Wagner, Acta Cryst. B69 (2013) 249-259).
;
_refine_ls_abs_structure_Flack     0.002(19)
_refine_ls_extinction_coef         .
_refine_ls_extinction_method       none
_refine_ls_goodness_of_fit_ref     1.058
_refine_ls_hydrogen_treatment      mixed
_refine_ls_matrix_type             full
_refine_ls_number_parameters       245
_refine_ls_number_reflns           7563
_refine_ls_number_restraints       4
_refine_ls_R_factor_all            0.0486
_refine_ls_R_factor_gt             0.0400
_refine_ls_restrained_S_all        1.078
_refine_ls_shift/su_max            0.001
_refine_ls_shift/su_mean           0.000
_refine_ls_structure_factor_coef   Fsqd
_refine_ls_weighting_details      
 'w=1/[\s^2^(Fo^2^)+(0.0341P)^2^+2.2676P] where P=(Fo^2^+2Fc^2^)/3'
_refine_ls_weighting_scheme        calc
_refine_ls_wR_factor_gt            0.0838
_refine_ls_wR_factor_ref           0.0875
_refine_special_details            ?
_olex2_refinement_description
;
1. Fixed Uiso
 At 1.2 times of:
  All C(H) groups
 At 1.5 times of:
  All C(H,H,H) groups, All C(H,H,H,H,H) groups
2. Restrained distances
 O1W-H1WA
 0.95 with sigma of 0.02
 O1W-H1WB
 0.95 with sigma of 0.02
 N1N-O2N
 1.1 with sigma of 0.008
 Ru1-N1N
 1.7 with sigma of 0.008
3.a Aromatic/amide H refined with riding coordinates:
 C2(H2), C6(H6), C3(H3), C5(H5)
3.b Idealised Me refined as rotating group:
 C12(H12A,H12B,H12C), C14(H14A,H14B,H14C), C15(H15A,H15B,H15C), C13(H13A,H13B,
 H13C)
;
_atom_sites_solution_hydrogens     mixed
_atom_sites_solution_primary       dual
_atom_sites_solution_secondary     ?
loop_
  _atom_site_label
  _atom_site_type_symbol
  _atom_site_fract_x
  _atom_site_fract_y
  _atom_site_fract_z
  _atom_site_U_iso_or_equiv
  _atom_site_adp_type
  _atom_site_occupancy
  _atom_site_site_symmetry_order
  _atom_site_calc_flag
  _atom_site_refinement_flags_posn
  _atom_site_refinement_flags_adp
  _atom_site_refinement_flags_occupancy
  _atom_site_disorder_assembly
  _atom_site_disorder_group
 Ru1 Ru 0.67441(5) 0.95892(2) 0.95199(2) 0.01814(7) Uani 1 1 d D . . . .
 Cl2 Cl 0.40359(14) 0.86370(7) 0.95280(6) 0.02526(19) Uani 1 1 d . . . . .
 Cl4 Cl 0.95062(15) 1.05172(7) 0.94902(6) 0.0269(2) Uani 1 1 d . . . . .
 Cl1 Cl 0.84349(16) 0.84994(7) 0.88872(5) 0.02405(19) Uani 1 1 d . . . . .
 Cl3 Cl 0.56044(17) 1.01977(7) 0.84145(6) 0.0273(2) Uani 1 1 d . . . . .
 Na1 Na 0.1756(3) 0.93901(14) 0.84692(11) 0.0390(5) Uani 1 1 d . . . . .
 N1 N 0.7768(5) 0.8979(2) 1.0459(2) 0.0193(6) Uani 1 1 d . . . . .
 C2 C 0.9654(6) 0.8813(3) 1.0546(2) 0.0193(7) Uani 1 1 d . . . . .
 H2 H 1.052197 0.899359 1.018404 0.023 Uiso 1 1 calc R . . . .
 N1N N 0.5441(5) 1.0414(3) 1.0014(2) 0.0297(8) Uani 1 1 d D . . . .
 C6 C 0.6559(6) 0.8716(3) 1.0969(2) 0.0249(8) Uani 1 1 d . . . . .
 H6 H 0.523658 0.884292 1.091360 0.030 Uiso 1 1 calc R . . . .
 O2N O 0.4675(8) 1.0880(3) 1.0275(2) 0.0562(12) Uani 1 1 d D . . . .
 C3 C 1.0363(6) 0.8388(3) 1.1146(2) 0.0199(7) Uani 1 1 d . . . . .
 H3 H 1.169865 0.829291 1.119805 0.024 Uiso 1 1 calc R . . . .
 C4 C 0.9099(6) 0.8104(3) 1.1669(2) 0.0192(7) Uani 1 1 d . . . . .
 C7 C 0.9737(6) 0.7616(3) 1.2302(2) 0.0202(8) Uani 1 1 d . . . . .
 C5 C 0.7152(6) 0.8268(3) 1.1573(2) 0.0243(9) Uani 1 1 d . . . . .
 H5 H 0.624677 0.807388 1.191739 0.029 Uiso 1 1 calc R . . . .
 N8 N 0.8706(5) 0.6998(2) 1.26371(19) 0.0214(7) Uani 1 1 d . . . . .
 O17 O 0.7181(5) 0.6655(3) 1.2409(2) 0.0377(9) Uani 1 1 d . . . . .
 C11 C 0.9481(6) 0.6782(3) 1.3358(2) 0.0206(7) Uani 1 1 d . . . . .
 N9 N 1.1398(5) 0.7737(3) 1.2651(2) 0.0233(7) Uani 1 1 d . . . . .
 C10 C 1.1578(7) 0.7112(3) 1.3279(2) 0.0224(8) Uani 1 1 d . . . . .
 C12 C 0.8314(8) 0.7317(3) 1.3888(2) 0.0302(9) Uani 1 1 d . . . . .
 H12A H 0.845304 0.794921 1.378282 0.045 Uiso 1 1 calc GR . . . .
 H12B H 0.877230 0.719805 1.437370 0.045 Uiso 1 1 calc GR . . . .
 H12C H 0.696395 0.714906 1.385111 0.045 Uiso 1 1 calc GR . . . .
 O16 O 1.2756(6) 0.8235(3) 1.2444(2) 0.0421(9) Uani 1 1 d . . . . .
 C14 C 1.2971(7) 0.6393(4) 1.3042(2) 0.0324(10) Uani 1 1 d . . . . .
 H14A H 1.247485 0.610079 1.261252 0.049 Uiso 1 1 calc GR . . . .
 H14B H 1.311653 0.595543 1.342463 0.049 Uiso 1 1 calc GR . . . .
 H14C H 1.421652 0.665960 1.293560 0.049 Uiso 1 1 calc GR . . . .
 C15 C 1.2380(8) 0.7614(4) 1.3914(3) 0.0336(11) Uani 1 1 d . . . . .
 H15A H 1.366370 0.783140 1.379923 0.050 Uiso 1 1 calc GR . . . .
 H15B H 1.244852 0.721832 1.432845 0.050 Uiso 1 1 calc GR . . . .
 H15C H 1.154412 0.811635 1.402578 0.050 Uiso 1 1 calc GR . . . .
 O1W O 0.0135(7) 1.0284(3) 0.7696(3) 0.0545(12) Uani 1 1 d D . . . .
 C13 C 0.9234(8) 0.5796(3) 1.3501(3) 0.0327(11) Uani 1 1 d . . . . .
 H13A H 0.786889 0.564817 1.350023 0.049 Uiso 1 1 calc GR . . . .
 H13B H 0.978469 0.564979 1.396804 0.049 Uiso 1 1 calc GR . . . .
 H13C H 0.988810 0.545658 1.312846 0.049 Uiso 1 1 calc GR . . . .
 H1WA H 0.096(8) 1.080(3) 0.774(4) 0.049 Uiso 1 1 d DR . . . .
 H1WB H -0.106(6) 1.039(5) 0.797(3) 0.049 Uiso 1 1 d DR . . . .

loop_
  _atom_site_aniso_label
  _atom_site_aniso_U_11
  _atom_site_aniso_U_22
  _atom_site_aniso_U_33
  _atom_site_aniso_U_23
  _atom_site_aniso_U_13
  _atom_site_aniso_U_12
 Ru1 0.02169(13) 0.01703(12) 0.01570(12) -0.00113(11) -0.00331(13) 0.00302(12)
 Cl2 0.0209(4) 0.0281(5) 0.0268(4) -0.0008(5) -0.0024(4) 0.0004(4)
 Cl4 0.0337(5) 0.0229(4) 0.0240(4) 0.0029(4) -0.0032(4) -0.0059(4)
 Cl1 0.0268(5) 0.0233(4) 0.0220(4) -0.0037(3) 0.0023(4) 0.0009(4)
 Cl3 0.0316(5) 0.0275(5) 0.0229(5) -0.0001(4) -0.0040(4) 0.0025(4)
 Na1 0.0362(10) 0.0467(12) 0.0340(10) 0.0061(9) -0.0051(10) -0.0011(10)
 N1 0.0181(14) 0.0196(14) 0.0202(15) 0.0002(14) 0.0008(14) 0.0029(11)
 C2 0.0190(16) 0.0210(16) 0.0178(17) 0.0030(15) 0.0012(15) 0.0014(14)
 N1N 0.0233(17) 0.040(2) 0.0261(18) 0.0181(19) -0.0065(14) 0.0029(19)
 C6 0.0206(18) 0.036(2) 0.0186(17) 0.0042(16) 0.0016(16) 0.0043(18)
 O2N 0.074(3) 0.061(3) 0.034(2) 0.000(2) -0.010(2) -0.004(3)
 C3 0.0159(16) 0.0220(18) 0.0218(18) 0.0052(15) -0.0010(14) -0.0020(15)
 C4 0.0198(18) 0.0209(18) 0.0169(17) 0.0030(14) -0.0015(14) 0.0002(15)
 C7 0.0212(18) 0.0207(18) 0.0186(17) 0.0041(14) -0.0005(15) 0.0007(15)
 C5 0.0207(19) 0.034(2) 0.0184(18) 0.0059(17) 0.0024(15) 0.0040(16)
 N8 0.0209(16) 0.0266(17) 0.0167(15) 0.0040(13) 0.0005(12) -0.0034(13)
 O17 0.0300(18) 0.047(2) 0.0366(19) 0.0050(17) -0.0043(15) -0.0132(16)
 C11 0.0234(18) 0.0223(18) 0.0160(16) 0.0025(14) 0.0010(15) 0.0024(15)
 N9 0.0187(17) 0.0272(17) 0.0239(16) 0.0033(14) -0.0036(13) -0.0031(14)
 C10 0.0220(18) 0.0281(19) 0.0171(16) 0.0014(14) -0.0039(15) 0.0047(17)
 C12 0.031(2) 0.034(2) 0.026(2) -0.0014(17) 0.006(2) 0.004(2)
 O16 0.0333(19) 0.050(2) 0.044(2) 0.0074(19) -0.0061(16) -0.0172(18)
 C14 0.034(3) 0.041(3) 0.022(2) -0.0028(19) -0.0022(19) 0.011(2)
 C15 0.035(2) 0.040(3) 0.026(2) -0.007(2) -0.009(2) 0.004(2)
 O1W 0.063(3) 0.046(3) 0.055(3) 0.013(2) -0.005(2) -0.010(2)
 C13 0.049(3) 0.023(2) 0.026(2) 0.0053(18) -0.001(2) 0.002(2)

_geom_special_details
;
 All esds (except the esd in the dihedral angle between two l.s. planes)
 are estimated using the full covariance matrix.  The cell esds are taken
 into account individually in the estimation of esds in distances, angles
 and torsion angles; correlations between esds in cell parameters are only
 used when they are defined by crystal symmetry.  An approximate (isotropic)
 treatment of cell esds is used for estimating esds involving l.s. planes.
;
loop_
  _geom_bond_atom_site_label_1
  _geom_bond_atom_site_label_2
  _geom_bond_distance
  _geom_bond_site_symmetry_2
  _geom_bond_publ_flag
 Ru1 Cl2 2.3778(11) . ?
 Ru1 Cl4 2.3868(11) . ?
 Ru1 Cl1 2.3475(11) . ?
 Ru1 Cl3 2.4005(11) . ?
 Ru1 N1 2.110(4) . ?
 Ru1 N1N 1.799(4) . ?
 Cl2 Na1 2.787(2) . ?
 Cl4 Na1 3.004(3) 1_655 ?
 Cl1 Na1 2.795(3) 1_655 ?
 Cl3 Na1 2.956(3) . ?
 Na1 O17 2.299(5) 3_467 ?
 Na1 O1W 2.281(5) . ?
 N1 C2 1.352(5) . ?
 N1 C6 1.335(5) . ?
 C2 C3 1.384(6) . ?
 N1N O2N 1.011(5) . ?
 C6 C5 1.382(6) . ?
 C3 C4 1.388(6) . ?
 C4 C7 1.465(6) . ?
 C4 C5 1.395(6) . ?
 C7 N8 1.336(5) . ?
 C7 N9 1.344(5) . ?
 N8 O17 1.260(5) . ?
 N8 C11 1.490(5) . ?
 C11 C10 1.555(6) . ?
 C11 C12 1.518(6) . ?
 C11 C13 1.523(6) . ?
 N9 C10 1.514(5) . ?
 N9 O16 1.272(5) . ?
 C10 C14 1.526(6) . ?
 C10 C15 1.518(6) . ?

loop_
  _geom_angle_atom_site_label_1
  _geom_angle_atom_site_label_2
  _geom_angle_atom_site_label_3
  _geom_angle
  _geom_angle_site_symmetry_1
  _geom_angle_site_symmetry_3
  _geom_angle_publ_flag
 Cl2 Ru1 Cl4 178.42(4) . . ?
 Cl2 Ru1 Cl3 88.44(4) . . ?
 Cl4 Ru1 Cl3 91.35(4) . . ?
 Cl1 Ru1 Cl2 88.85(4) . . ?
 Cl1 Ru1 Cl4 89.58(4) . . ?
 Cl1 Ru1 Cl3 90.04(4) . . ?
 N1 Ru1 Cl2 90.03(10) . . ?
 N1 Ru1 Cl4 90.09(9) . . ?
 N1 Ru1 Cl1 86.73(9) . . ?
 N1 Ru1 Cl3 176.46(10) . . ?
 N1N Ru1 Cl2 90.70(14) . . ?
 N1N Ru1 Cl4 90.87(14) . . ?
 N1N Ru1 Cl1 179.24(13) . . ?
 N1N Ru1 Cl3 90.56(12) . . ?
 N1N Ru1 N1 92.65(14) . . ?
 Ru1 Cl2 Na1 101.77(6) . . ?
 Ru1 Cl4 Na1 96.06(6) . 1_655 ?
 Ru1 Cl1 Na1 102.82(6) . 1_655 ?
 Ru1 Cl3 Na1 96.56(5) . . ?
 Cl2 Na1 Cl4 94.48(7) . 1_455 ?
 Cl2 Na1 Cl1 94.56(7) . 1_455 ?
 Cl2 Na1 Cl3 70.88(6) . . ?
 Cl1 Na1 Cl4 70.11(6) 1_455 1_455 ?
 Cl1 Na1 Cl3 164.66(9) 1_455 . ?
 Cl3 Na1 Cl4 105.35(7) . 1_455 ?
 O17 Na1 Cl2 98.89(12) 3_467 . ?
 O17 Na1 Cl4 155.78(13) 3_467 1_455 ?
 O17 Na1 Cl1 88.69(12) 3_467 1_455 ?
 O17 Na1 Cl3 98.10(12) 3_467 . ?
 O1W Na1 Cl2 167.76(16) . . ?
 O1W Na1 Cl4 78.93(15) . 1_455 ?
 O1W Na1 Cl1 92.88(15) . 1_455 ?
 O1W Na1 Cl3 100.70(15) . . ?
 O1W Na1 O17 90.98(18) . 3_467 ?
 C2 N1 Ru1 120.8(3) . . ?
 C6 N1 Ru1 120.7(3) . . ?
 C6 N1 C2 118.4(4) . . ?
 N1 C2 C3 122.2(4) . . ?
 O2N N1N Ru1 177.8(4) . . ?
 N1 C6 C5 122.7(4) . . ?
 C2 C3 C4 119.2(4) . . ?
 C3 C4 C7 122.2(4) . . ?
 C3 C4 C5 118.4(4) . . ?
 C5 C4 C7 119.4(4) . . ?
 N8 C7 C4 124.5(4) . . ?
 N8 C7 N9 109.5(4) . . ?
 N9 C7 C4 126.0(4) . . ?
 C6 C5 C4 119.0(4) . . ?
 C7 N8 C11 112.4(3) . . ?
 O17 N8 C7 125.8(4) . . ?
 O17 N8 C11 121.6(4) . . ?
 N8 O17 Na1 129.3(3) . 3_567 ?
 N8 C11 C10 100.7(3) . . ?
 N8 C11 C12 106.3(4) . . ?
 N8 C11 C13 109.4(4) . . ?
 C12 C11 C10 113.5(4) . . ?
 C12 C11 C13 110.1(4) . . ?
 C13 C11 C10 115.9(4) . . ?
 C7 N9 C10 111.4(4) . . ?
 O16 N9 C7 125.3(4) . . ?
 O16 N9 C10 122.9(4) . . ?
 N9 C10 C11 101.3(3) . . ?
 N9 C10 C14 105.7(3) . . ?
 N9 C10 C15 109.2(4) . . ?
 C14 C10 C11 113.7(4) . . ?
 C15 C10 C11 115.7(4) . . ?
 C15 C10 C14 110.4(4) . . ?

_shelx_res_file
;
TITL pb002 in P2(1)2(1)2(1)
    pb002.res
    created by SHELXL-2016/6 at 16:09:30 on 09-Jun-2023
CELL 0.71073 6.9913 15.1057 18.7215 90 90 90
ZERR 4 0.0002 0.0003 0.0005 0 0 0
LATT -1
SYMM 0.5-X,-Y,0.5+Z
SYMM 0.5+X,0.5-Y,-Z
SYMM -X,0.5+Y,0.5-Z
SFAC C H Cl N Na O Ru
UNIT 48 72 16 16 4 16 4
DFIX 0.95 O1W H1Wa
DFIX 0.95 O1W H1Wb
DFIX 1.1 0.008 N1N O2N
DFIX 1.7 0.008 Ru1 N1N

L.S. 20
PLAN  20
SIZE 0.14 0.12 0.05
TEMP -123
FREE Na1 H1Wa
GRID
fmap 2
ACTA
MERG 2
REM <olex2.extras>
REM <HklSrc "%.\\pb002.hkl">
REM </olex2.extras>

WGHT    0.034100    2.267600
FVAR       0.12689
RU1   7    0.674411    0.958921    0.951993    11.00000    0.02169    0.01703 =
         0.01570   -0.00113   -0.00331    0.00302
CL2   3    0.403586    0.863702    0.952800    11.00000    0.02085    0.02813 =
         0.02682   -0.00077   -0.00240    0.00040
CL4   3    0.950619    1.051716    0.949019    11.00000    0.03367    0.02286 =
         0.02403    0.00290   -0.00321   -0.00594
CL1   3    0.843489    0.849935    0.888723    11.00000    0.02685    0.02333 =
         0.02199   -0.00368    0.00225    0.00093
CL3   3    0.560443    1.019769    0.841454    11.00000    0.03155    0.02747 =
         0.02288   -0.00007   -0.00399    0.00245
NA1   5    0.175578    0.939012    0.846917    11.00000    0.03618    0.04671 =
         0.03403    0.00608   -0.00512   -0.00112
N1    4    0.776833    0.897876    1.045892    11.00000    0.01812    0.01965 =
         0.02025    0.00019    0.00078    0.00292
C2    1    0.965415    0.881279    1.054624    11.00000    0.01902    0.02098 =
         0.01776    0.00296    0.00125    0.00138
AFIX  43
H2    2    1.052197    0.899359    1.018404    11.00000   -1.20000
AFIX   0
N1N   4    0.544079    1.041359    1.001374    11.00000    0.02328    0.03984 =
         0.02611    0.01815   -0.00646    0.00293
C6    1    0.655938    0.871619    1.096853    11.00000    0.02058    0.03570 =
         0.01856    0.00417    0.00161    0.00426
AFIX  43
H6    2    0.523658    0.884292    1.091360    11.00000   -1.20000
AFIX   0
O2N   6    0.467522    1.087975    1.027503    11.00000    0.07380    0.06080 =
         0.03386    0.00015   -0.01043   -0.00405
C3    1    1.036291    0.838831    1.114561    11.00000    0.01594    0.02197 =
         0.02182    0.00524   -0.00100   -0.00203
AFIX  43
H3    2    1.169865    0.829291    1.119805    11.00000   -1.20000
AFIX   0
C4    1    0.909912    0.810376    1.166896    11.00000    0.01977    0.02092 =
         0.01688    0.00302   -0.00148    0.00023
C7    1    0.973749    0.761638    1.230221    11.00000    0.02121    0.02068 =
         0.01860    0.00409   -0.00049    0.00070
C5    1    0.715182    0.826770    1.157271    11.00000    0.02071    0.03382 =
         0.01842    0.00587    0.00244    0.00405
AFIX  43
H5    2    0.624677    0.807388    1.191739    11.00000   -1.20000
AFIX   0
N8    4    0.870623    0.699825    1.263714    11.00000    0.02092    0.02665 =
         0.01674    0.00399    0.00048   -0.00339
O17   6    0.718117    0.665513    1.240946    11.00000    0.03003    0.04656 =
         0.03659    0.00502   -0.00429   -0.01317
C11   1    0.948095    0.678238    1.335799    11.00000    0.02336    0.02231 =
         0.01603    0.00246    0.00102    0.00238
N9    4    1.139767    0.773711    1.265051    11.00000    0.01869    0.02721 =
         0.02387    0.00327   -0.00363   -0.00314
C10   1    1.157760    0.711210    1.327911    11.00000    0.02199    0.02808 =
         0.01707    0.00145   -0.00393    0.00470
C12   1    0.831421    0.731703    1.388839    11.00000    0.03089    0.03390 =
         0.02582   -0.00138    0.00573    0.00385
AFIX 137
H12A  2    0.845304    0.794921    1.378282    11.00000   -1.50000
H12B  2    0.877230    0.719805    1.437370    11.00000   -1.50000
H12C  2    0.696395    0.714906    1.385111    11.00000   -1.50000
AFIX   0
O16   6    1.275562    0.823510    1.244394    11.00000    0.03333    0.04952 =
         0.04351    0.00741   -0.00614   -0.01715
C14   1    1.297095    0.639266    1.304174    11.00000    0.03401    0.04084 =
         0.02228   -0.00284   -0.00216    0.01129
AFIX 137
H14A  2    1.247485    0.610079    1.261252    11.00000   -1.50000
H14B  2    1.311653    0.595543    1.342463    11.00000   -1.50000
H14C  2    1.421652    0.665960    1.293560    11.00000   -1.50000
AFIX   0
C15   1    1.237952    0.761401    1.391442    11.00000    0.03494    0.03970 =
         0.02606   -0.00666   -0.00913    0.00389
AFIX 137
H15A  2    1.366370    0.783140    1.379923    11.00000   -1.50000
H15B  2    1.244852    0.721832    1.432845    11.00000   -1.50000
H15C  2    1.154412    0.811635    1.402578    11.00000   -1.50000
AFIX   0
O1W   6    0.013519    1.028450    0.769613    11.00000    0.06256    0.04636 =
         0.05452    0.01272   -0.00494   -0.01038
C13   1    0.923360    0.579629    1.350147    11.00000    0.04886    0.02345 =
         0.02564    0.00529   -0.00109    0.00156
AFIX 137
H13A  2    0.786889    0.564817    1.350023    11.00000   -1.50000
H13B  2    0.978469    0.564979    1.396804    11.00000   -1.50000
H13C  2    0.988810    0.545658    1.312846    11.00000   -1.50000
AFIX   0
H1WA  2    0.095579    1.079529    0.774274    11.00000   -1.50000
H1WB  2   -0.105724    1.039426    0.797454    11.00000   -1.50000
HKLF 4


REM  pb002 in P2(1)2(1)2(1)
REM R1 =  0.0400 for    6751 Fo > 4sig(Fo)  and  0.0486 for all    7563 data
REM    245 parameters refined using      4 restraints

END

WGHT      0.0341      2.2676

REM Highest difference peak  1.293,  deepest hole -0.808,  1-sigma level  0.111
Q1    1   0.7633  0.9611  0.9332  11.00000  0.05    1.29
Q2    1   0.5539  1.0731  1.0172  11.00000  0.05    0.97
Q3    1   0.5975  1.0406  0.8053  11.00000  0.05    0.85
Q4    1   0.6492  1.0163  0.8695  11.00000  0.05    0.81
Q5    1   0.3876  1.0804  1.0193  11.00000  0.05    0.52
Q6    1   0.5531  1.0153  1.0141  11.00000  0.05    0.48
Q7    1   0.1875  0.8960  0.8217  11.00000  0.05    0.47
Q8    1   0.4195  1.0971  1.0112  11.00000  0.05    0.47
Q9    1   0.6251  0.8995  0.8708  11.00000  0.05    0.45
Q10   1   0.5432  0.9800  0.9665  11.00000  0.05    0.45
Q11   1   0.7473  0.9665  0.9821  11.00000  0.05    0.44
Q12   1   0.5116  1.0461  0.9775  11.00000  0.05    0.44
Q13   1   0.8878  0.9630  0.9360  11.00000  0.05    0.43
Q14   1   0.9803  0.8222  1.1443  11.00000  0.05    0.42
Q15   1   0.4757  1.1209  1.0144  11.00000  0.05    0.42
Q16   1   0.4677  1.0994  1.0436  11.00000  0.05    0.41
Q17   1   1.0447  1.0434  0.9685  11.00000  0.05    0.41
Q18   1   0.6136  1.0421  0.9888  11.00000  0.05    0.41
Q19   1   0.9148  0.7161  1.3569  11.00000  0.05    0.41
Q20   1   0.7724  0.9009  0.9064  11.00000  0.05    0.41
;
_shelx_res_checksum                38607
_shelx_hkl_file
;
   1   0   0    0.14    0.06
   1   0   0    0.06    0.07
  -1   0   0    0.12    0.06
  -2   0   0    9.21    0.47
   2   0   0   10.06    0.53
   2   0   0    9.81    0.47
   3   0   0    0.43    0.17
  -3   0   0    0.49    0.18
   3   0   0   -0.01    0.15
   4   0   0   16.37    0.86
  -4   0   0   17.15    0.89
   4   0   0   17.37    1.00
   5   0   0    0.08    0.23
   5   0   0   -0.09    0.22
  -5   0   0    0.29    0.29
  -6   0   0   60.99    2.34
   6   0   0   63.33    2.55
   7   0   0    1.36    0.59
  -7   0   0    0.30    0.45
   8   0   0   59.10    2.79
  -8   0   0   56.48    2.51
   9   0   0    0.16    0.58
  -9   0   0    0.42    0.52
 -10   0   0    7.03    1.33
  10   0   0    7.79    1.46
  -1  -1   0  503.49   12.13
  -1   1   0  495.92   12.11
   1  -1   0  500.41   12.10
   1   1   0  502.44   11.99
   2   1   0   56.70    1.75
   2  -1   0   55.08    1.67
  -2  -1   0   56.12    1.58
  -2   1   0   54.11    1.68
   2  -1   0   57.19    1.65
  -2  -1   0   53.01    1.70
   2   1   0   54.66    1.56
   3  -1   0    3.49    0.36
   3   1   0    2.84    0.41
  -3   1   0    3.43    0.37
   3   1   0    3.47    0.30
   3  -1   0    3.21    0.39
  -3  -1   0    3.31    0.32
   4   1   0   46.27    1.67
   4  -1   0   50.06    1.83
   4  -1   0   53.42    1.89
  -4   1   0   52.11    1.86
   4   1   0   53.40    1.99
  -4  -1   0   48.00    1.71
   5   1   0    8.05    0.80
   5   1   0    9.03    0.66
  -5   1   0    8.75    0.75
   5  -1   0    8.65    0.75
   5  -1   0    7.35    0.67
  -5  -1   0    9.43    0.71
   6   1   0    6.09    0.80
  -6   1   0    4.18    0.61
   6  -1   0    4.32    0.73
  -6  -1   0    4.41    0.62
  -7  -1   0  114.44    3.83
  -7   1   0  118.14    4.02
   7  -1   0  124.69    4.21
   7   1   0  119.12    4.29
  -8   1   0    5.14    0.89
   8   1   0    6.29    0.99
   8  -1   0    7.70    1.08
  -8  -1   0    3.84    0.81
  -9   1   0    0.10    0.64
   9  -1   0   -0.46    0.58
   9   1   0    0.95    0.65
  -9  -1   0   -1.05    0.46
 -10  -1   0    0.39    0.87
  10  -1   0    1.22    0.87
 -10   1   0    1.50    0.95
  10   1   0    1.12    0.86
   0   2   0  245.26    5.88
   0  -2   0  242.40    5.88
   0   2   0  239.65    5.94
   0  -2   0  243.05    5.94
   1   2   0   18.21    0.72
  -1  -2   0   18.75    0.72
  -1   2   0   19.31    0.73
  -1  -2   0   19.80    0.59
   1   2   0   18.98    0.58
   1  -2   0   19.02    0.72
   2   2   0   89.08    2.58
  -2  -2   0   85.50    2.52
   2  -2   0   83.73    2.47
   2   2   0   84.43    2.27
   2  -2   0   87.83    2.34
  -2  -2   0   86.91    2.28
  -2   2   0   86.09    2.50
   3  -2   0   17.42    0.78
   3   2   0   14.11    0.64
  -3  -2   0   15.12    0.67
   3   2   0   16.94    0.91
   3  -2   0   16.13    0.82
  -3   2   0   16.55    0.85
  -3  -2   0   15.01    0.82
   4   2   0    2.87    0.35
   4  -2   0    3.76    0.47
   4  -2   0    3.13    0.45
  -4  -2   0    3.32    0.38
   4   2   0    2.86    0.53
  -4   2   0    2.18    0.44
   5  -2   0   12.49    0.90
  -5  -2   0   13.65    0.79
   5   2   0   10.79    0.71
   5   2   0   11.77    0.98
  -5   2   0   11.82    0.88
  -6   2   0   24.79    1.44
   6   2   0   27.65    2.38
   6  -2   0   27.21    1.47
  -6  -2   0   24.02    1.23
   6   2   0   25.03    1.25
   7  -2   0    1.46    0.63
  -7   2   0    1.49    0.74
  -7  -2   0    1.67    0.51
   7   2   0    2.43    0.72
  -8   2   0   49.95    2.42
   8  -2   0   51.45    2.52
   8   2   0   47.85    2.61
  -8  -2   0   51.81    2.20
  -9  -2   0    0.46    0.56
  -9   2   0    0.42    0.67
   9   2   0    0.57    0.76
   9  -2   0    0.66    0.67
 -10   2   0    1.71    0.95
  10   2   0    2.40    1.11
 -10  -2   0    1.55    1.02
  10  -2   0    1.53    0.84
   0   3   0    0.13    0.12
   0   3   0    0.11    0.10
   0  -3   0    0.03    0.10
   0  -3   0    0.11    0.08
   1  -3   0  198.09    5.18
  -1  -3   0  202.95    5.17
  -1  -3   0  203.67    5.00
   1  -3   0  203.16    4.89
   1   3   0  202.21    5.18
  -2  -3   0   54.50    1.55
   2   3   0   54.52    1.56
  -2  -3   0   54.25    1.83
  -2   3   0   57.62    1.86
   2  -3   0   58.15    1.83
   2  -3   0   58.66    1.57
  -3  -3   0   63.82    2.23
   3   3   0   67.18    2.32
  -3   3   0   71.69    2.30
  -3  -3   0   68.73    1.95
   3   3   0   66.62    1.93
   3  -3   0   69.35    2.03
   3  -3   0   66.59    2.23
   4   3   0   72.76    2.58
  -4  -3   0   70.21    2.13
   4   3   0   67.45    2.10
   4  -3   0   67.62    2.38
   4  -3   0   71.67    2.25
  -4   3   0   68.91    2.45
  -5  -3   0   22.55    1.04
  -5   3   0   22.65    1.29
   5   3   0   25.37    1.45
   5  -3   0   22.45    1.18
   5   3   0   22.61    1.04
   6   3   0    9.49    0.72
   6   3   0   10.20    1.06
   6  -3   0   13.09    1.00
  -6   3   0    9.76    0.95
  -6  -3   0   10.29    0.76
  -7   3   0   10.26    1.07
   7   3   0   11.34    1.19
  -7  -3   0   11.11    0.90
   7  -3   0   11.63    1.03
  -8   3   0   21.17    1.62
   8  -3   0   25.38    1.60
  -8  -3   0   19.92    1.28
   8   3   0   22.25    1.80
   9  -3   0    5.50    1.19
  -9  -3   0    2.38    0.92
   9   3   0    3.52    0.98
  -9   3   0    3.04    0.88
  10   3   0    9.73    1.57
 -10   3   0    8.56    1.83
  10  -3   0    9.02    2.12
 -10  -3   0    8.41    1.76
   0   4   0    8.38    0.41
   0  -4   0    8.00    0.45
   0   4   0    8.76    0.48
   0  -4   0    7.99    0.40
  -1  -4   0   76.52    2.08
  -1   4   0   74.39    2.26
   1  -4   0   75.59    2.24
  -1  -4   0   74.96    2.20
  -1  -4   0   74.51    2.07
   1  -4   0   75.05    1.90
   1   4   0   74.79    2.22
  -1   4   0   76.76    1.92
   2  -4   0    4.42    0.33
  -2  -4   0    4.31    0.29
   2   4   0    4.36    0.49
   2   4   0    4.05    0.27
   2  -4   0    4.70    0.44
  -2  -4   0    3.46    0.42
  -2   4   0    3.91    0.44
  -3  -4   0   55.26    1.65
   3   4   0   56.51    1.66
   3  -4   0   54.67    1.98
   3   4   0   55.86    2.07
   3  -4   0   59.02    1.71
  -3   4   0   58.32    2.07
  -3  -4   0   53.36    1.99
  -4   4   0    0.42    0.31
   4  -4   0    0.80    0.26
   4   4   0    0.27    0.33
   4   4   0    0.51    0.17
  -4  -4   0    0.55    0.20
  -5   4   0   27.74    1.50
  -5  -4   0   26.74    1.13
   5  -4   0   27.03    1.25
   5   4   0   26.08    1.12
   5   4   0   28.15    1.60
  -6   4   0   22.83    1.45
   6   4   0   19.68    1.48
  -6  -4   0   21.03    1.06
   6   4   0   20.83    1.22
   6  -4   0   19.70    1.19
   7   4   0    4.67    0.70
  -7   4   0    5.84    0.90
   7  -4   0    5.45    0.82
   7   4   0    3.97    0.92
  -7  -4   0    4.73    0.63
  -8   4   0   10.27    1.20
   8  -4   0   10.76    1.11
   8   4   0    9.60    1.28
  -8  -4   0   10.08    0.91
  -9  -4   0   16.14    1.28
  -9   4   0   16.87    1.61
   9  -4   0   17.53    1.57
   9   4   0   17.62    1.77
 -10   4   0    3.41    1.06
  10   4   0    1.65    0.98
  10  -4   0    1.65    0.85
   0  -5   0    0.51    0.15
   0   5   0    0.71    0.20
   0  -5   0    0.46    0.15
   0   5   0    0.48    0.16
   1   5   0    0.73    0.22
  -1  -5   0    0.79    0.21
   1  -5   0    0.51    0.19
  -1  -5   0    0.47    0.16
   1  -5   0    0.51    0.10
  -1   5   0    0.47    0.20
  -1   5   0    0.59    0.12
  -1  -5   0    0.92    0.21
  -2  -5   0  516.08   12.94
  -2  -5   0  509.57   12.57
   2   5   0  516.42   12.98
   2  -5   0  523.51   12.42
  -2   5   0  517.86   13.02
   2  -5   0  513.61   12.96
  -3  -5   0   52.64    1.98
  -3  -5   0   52.76    1.58
   3   5   0   54.42    2.06
  -3   5   0   54.13    2.05
   3  -5   0   53.92    1.62
   3  -5   0   49.30    1.93
   3   5   0   53.29    1.60
   3  -5   0   52.87    1.56
   4   5   0  155.58    4.76
  -4  -5   0  154.46    4.08
   4   5   0  150.22    4.08
  -4   5   0  154.99    4.69
   5  -5   0    0.60    0.30
   5   5   0    0.05    0.34
   5   5   0    0.16    0.22
  -5  -5   0    0.18    0.20
  -5   5   0    0.24    0.40
  -6   5   0    0.42    0.35
   6  -5   0    0.77    0.42
   6   5   0    0.60    0.34
   6   5   0    0.15    0.46
  -6  -5   0    0.98    0.31
  -7  -5   0    2.65    0.53
   7   5   0    3.09    0.62
  -7   5   0    2.58    0.63
   7  -5   0    3.44    0.69
   7   5   0    3.07    0.87
  -8   5   0   10.60    1.26
  -8  -5   0   10.32    0.89
   8   5   0   10.94    1.35
   8  -5   0   10.71    1.09
   9   5   0    4.62    1.14
  -9   5   0    8.15    1.35
  -9  -5   0    6.44    1.00
   9  -5   0    8.14    1.17
  10   5   0   16.12    1.99
  10  -5   0   20.02    1.74
 -10   5   0   17.65    1.96
   0  -6   0   54.70    1.79
   0  -6   0   54.91    1.65
   0   6   0   55.19    1.86
   0   6   0   55.82    1.68
  -1  -6   0   74.91    2.32
   1   6   0   79.24    2.38
  -1   6   0   76.50    2.46
   1  -6   0   74.92    2.40
  -1  -6   0   76.66    2.25
  -1   6   0   76.18    2.03
  -1  -6   0   75.66    2.26
   2   6   0    2.01    0.43
  -2   6   0    2.03    0.40
   2  -6   0    2.23    0.16
   2  -6   0    1.91    0.37
  -2  -6   0    1.75    0.27
  -2  -6   0    2.51    0.28
   3   6   0  136.64    3.69
   3  -6   0  138.21    3.56
  -3   6   0  140.27    4.28
   3  -6   0  142.44    3.61
   3   6   0  140.58    4.27
  -3  -6   0  138.14    3.69
  -4   6   0    4.66    0.62
  -4  -6   0    3.56    0.33
   4  -6   0    3.27    0.35
   4   6   0    3.01    0.32
   4   6   0    3.45    0.58
   4  -6   0    4.84    0.40
  -5   6   0  140.23    4.62
   5   6   0  138.86    3.85
   5  -6   0  140.32    3.96
   5   6   0  141.19    4.74
   5  -6   0  138.75    4.06
   6  -6   0    1.93    0.53
   6   6   0    1.96    0.43
   6  -6   0    2.09    0.50
  -6  -6   0    2.07    0.41
   6   6   0    2.17    0.68
  -6   6   0    1.72    0.59
   7   6   0   10.08    1.19
   7  -6   0    5.56    0.81
  -7   6   0    7.42    1.04
  -7  -6   0    7.89    0.66
  -8   6   0    1.24    0.62
  -8  -6   0    1.65    0.42
   8  -6   0    1.68    0.73
   8   6   0    1.46    0.82
  -9   6   0   21.40    2.34
   9  -6   0   22.46    1.63
  -9  -6   0   20.41    1.50
   9   6   0   18.51    1.91
  10   6   0    1.31    0.93
 -10   6   0   -0.04    0.95
  10  -6   0   -1.66    0.83
   0   7   0    0.20    0.19
   0  -7   0    0.13    0.20
   0   7   0    0.08    0.15
   0  -7   0    0.20    0.15
  -1   7   0   22.29    0.78
  -1  -7   0   21.63    0.95
  -1  -7   0   21.80    0.99
   1  -7   0   21.63    0.75
   1   7   0   22.50    1.03
  -1   7   0   22.18    1.12
   1  -7   0   20.38    1.27
  -2  -7   0   82.41    2.45
  -2   7   0   84.68    2.85
  -2  -7   0   82.71    2.72
  -2  -7   0   80.04    2.43
   2  -7   0   84.72    2.10
   2  -7   0   82.74    2.76
   2   7   0   87.77    2.80
   3  -7   0    2.89    0.21
  -3  -7   0    2.78    0.32
  -3   7   0    2.58    0.50
   3  -7   0    2.60    0.22
   3   7   0    2.86    0.52
  -3  -7   0    2.58    0.30
   4  -7   0  137.25    3.68
   4  -7   0  141.20    3.75
   4   7   0  140.10    3.78
   4   7   0  143.06    4.56
  -4   7   0  136.80    4.51
  -4  -7   0  141.01    3.77
  -5  -7   0   18.41    0.84
   5  -7   0   17.64    0.92
   5   7   0   18.50    1.39
   5  -7   0   17.53    0.89
   5   7   0   17.12    0.83
  -5   7   0   17.30    1.31
   6  -7   0   18.77    1.05
  -6  -7   0   19.75    0.91
  -6   7   0   18.11    1.45
   6  -7   0   19.58    1.28
   6   7   0   18.19    0.92
   6   7   0   22.29    1.67
  -7   7   0    2.34    0.81
   7   7   0    2.16    0.77
   7  -7   0    3.27    0.65
   7   7   0    3.08    0.54
  -7  -7   0    3.28    0.49
  -8  -7   0    5.71    0.65
   8   7   0    6.48    1.30
   8  -7   0    7.19    0.94
  -8   7   0    4.24    1.06
   9  -7   0    1.76    0.77
  -9   7   0    1.31    0.84
   9   7   0    1.90    0.90
 -10   7   0    1.10    1.08
  10   7   0    5.77    1.35
   0  -8   0   82.03    2.62
   0   8   0   82.67    2.70
   0  -8   0   83.55    2.44
   0   8   0   81.22    2.45
  -1  -8   0   20.54    1.00
  -1   8   0   19.96    1.12
  -1  -8   0   21.13    1.00
  -1   8   0   21.27    0.79
   1   8   0   21.67    1.06
   1  -8   0   21.10    0.76
  -1  -8   0   21.28    0.97
   1  -8   0   20.58    1.08
  -2  -8   0    9.77    0.75
   2   8   0    9.69    0.80
  -2  -8   0   11.29    0.72
  -2  -8   0   10.09    0.63
   2  -8   0   10.54    0.35
  -2   8   0    9.03    0.82
  -3  -8   0   21.35    0.92
   3   8   0   21.42    1.29
  -3   8   0   20.85    1.29
  -3  -8   0   20.54    0.89
   4  -8   0    0.81    0.19
  -4   8   0    0.51    0.32
   4  -8   0    1.25    0.24
  -4  -8   0    1.38    0.29
  -4  -8   0    0.62    0.25
   4   8   0    0.97    0.48
  -5  -8   0   27.34    1.07
   5  -8   0   27.02    1.06
   5   8   0   26.24    1.76
  -5   8   0   27.99    1.76
   5  -8   0   27.97    1.12
   6   8   0   11.23    0.72
  -6   8   0   12.47    1.26
   6  -8   0   13.16    0.87
   6  -8   0   12.85    0.81
   6   8   0   11.76    1.30
   7   8   0   -0.34    0.36
   7  -8   0   -0.15    0.55
  -7   8   0    0.10    0.45
   7  -8   0    0.62    0.45
   7   8   0   -0.09    0.54
   8   8   0   11.91    1.53
   8  -8   0    9.93    1.01
  -8  -8   0    8.39    1.02
  -8   8   0   10.94    1.39
  -9   8   0   -0.11    0.75
   9   8   0   -0.64    0.75
  10   8   0    1.33    1.12
 -10   8   0   -0.56    1.06
   0  -9   0   -0.15    0.20
   0   9   0    0.07    0.24
   0  -9   0    0.02    0.21
   0   9   0    0.06    0.18
   1   9   0   45.08    1.72
  -1  -9   0   44.58    1.64
  -1  -9   0   42.30    1.66
  -1   9   0   41.64    1.38
   1  -9   0   43.25    1.36
  -1  -9   0   44.09    1.86
  -1   9   0   43.54    1.86
  -2  -9   0    0.63    0.24
  -2   9   0    0.47    0.33
  -2  -9   0    0.57    0.25
   2   9   0    0.62    0.28
  -3  -9   0    9.59    0.62
   3   9   0   10.63    0.94
  -3  -9   0    9.20    0.60
  -3   9   0    7.93    0.87
  -4  -9   0   71.93    2.29
   4   9   0   83.73    4.20
  -4  -9   0   73.31    2.76
  -4   9   0   73.36    3.04
   5  -9   0   31.88    1.08
  -5   9   0   32.03    1.92
  -5  -9   0   34.28    1.27
  -5  -9   0   33.65    1.23
   5   9   0   34.16    2.01
   5  -9   0   32.69    1.07
   6  -9   0    2.96    0.52
  -6   9   0    2.37    0.84
   6  -9   0    3.01    0.71
   6   9   0    1.67    0.78
  -6  -9   0    2.36    0.36
  -7   9   0   14.33    1.40
   7   9   0   12.02    1.46
  -7  -9   0    9.24    0.58
  -7  -9   0   11.43    0.74
   7  -9   0   12.31    0.85
   8   9   0    3.69    1.07
  -8   9   0    1.05    0.78
   8  -9   0    1.82    0.60
  -9   9   0    0.24    0.81
   9   9   0    0.42    1.03
   0 -10   0  376.21    9.99
   0  10   0  382.93   10.11
   0  10   0  379.09    9.73
   0 -10   0  388.36    9.69
  -1 -10   0    2.96    0.45
  -1  10   0    2.98    0.56
  -1  10   0    2.53    0.32
  -1 -10   0    2.14    0.40
   1  10   0    2.52    0.46
  -1 -10   0    2.74    0.46
   1 -10   0    2.49    0.28
  -2 -10   0   19.59    1.02
   2  10   0   20.87    1.23
  -2 -10   0   19.04    1.01
  -2  10   0   21.10    1.34
  -3 -10   0   74.73    2.36
   3  10   0   72.98    2.85
  -3  10   0   71.34    2.94
  -3 -10   0   73.05    2.34
  -4 -10   0   10.09    0.65
  -4 -10   0   11.46    0.72
   4  10   0    9.32    1.10
  -4  10   0   13.89    1.24
  -5  10   0    7.63    1.09
   5  10   0    7.24    1.04
  -5 -10   0    6.87    0.65
  -5 -10   0    7.38    0.59
  -6  10   0   46.71    2.65
   6  10   0   52.58    2.75
  -6 -10   0   47.15    1.55
   7  10   0    5.23    1.24
  -7  10   0    4.61    1.01
   7 -10   0    5.78    0.53
  -8  10   0   11.72    1.60
   8  10   0   14.80    1.78
  -9  10   0    0.00    1.03
   9  10   0    0.20    0.88
   0  11   0    0.46    0.22
   0 -11   0    0.56    0.27
   0  11   0    0.41    0.31
  -1 -11   0   92.10    3.03
  -1 -11   0   86.42    2.90
  -1 -11   0   87.91    2.93
  -1  11   0   91.58    2.64
  -1  11   0   90.92    3.26
   1  11   0   90.96    3.00
   1 -11   0   89.20    2.56
  -2 -11   0    0.46    0.27
  -2  11   0    0.45    0.13
  -2 -11   0   -0.18    0.26
  -2  11   0   -0.35    0.30
   2  11   0   -0.23    0.25
  -3  11   0    0.04    0.41
   3  11   0    0.29    0.39
  -3 -11   0    0.47    0.30
  -3 -11   0    0.85    0.32
  -4 -11   0   47.80    1.65
  -4  11   0   41.65    2.31
   4  11   0   43.54    2.28
  -4 -11   0   43.07    1.62
   5  11   0    9.37    1.15
  -5  11   0   10.43    1.22
   6  11   0    8.49    1.18
  -6 -11   0    7.81    0.48
  -6  11   0    8.79    1.30
  -6 -11   0    8.70    0.58
   7  11   0   80.38    3.88
   8  11   0    3.83    1.15
  -8  11   0    3.83    1.18
   9  11   0   -0.29    0.82
  -9  11   0    1.76    1.23
   0  12   0  164.38    5.01
   0  12   0  150.82    4.48
  -1  12   0    8.82    0.94
   1  12   0    9.96    0.84
  -1  12   0    8.58    0.65
  -1 -12   0    7.82    0.78
   2  12   0    4.53    0.72
  -2 -12   0    4.38    0.56
  -2  12   0    5.54    0.86
  -2  12   0    5.24    0.29
  -2 -12   0    5.18    0.65
  -3 -12   0   26.19    1.27
  -3  12   0   26.94    1.76
   3  12   0   23.03    1.65
  -3 -12   0   23.47    1.19
  -4 -12   0   24.85    1.15
  -4  12   0   24.08    1.77
   4  12   0   22.85    1.70
  -4 -12   0   23.22    1.14
   5  12   0   23.07    1.77
  -5  12   0   24.44    1.87
  -5 -12   0   21.42    0.99
  -5 -12   0   20.43    0.98
  -6 -12   0   27.46    1.01
  -6 -12   0   27.99    0.93
   6  12   0   35.20    2.32
  -7  12   0   11.31    1.54
   7  12   0   12.20    1.69
  -8  12   0    8.79    1.70
   8  12   0   10.85    1.68
  -9  12   0   -1.53    0.95
   9  12   0    0.02    1.11
   0  13   0   -0.01    0.36
   0  13   0    0.83    0.40
   0 -13   0    0.26    0.31
  -1  13   0   91.37    2.77
  -1 -13   0   95.32    3.28
  -1  13   0   85.43    4.04
   1  13   0   91.55    3.15
  -2 -13   0   11.07    0.91
   2  13   0    9.76    0.98
  -2  13   0    9.12    1.08
  -3 -13   0    0.43    0.31
   3  13   0    1.37    0.61
  -3 -13   0    0.89    0.45
  -3  13   0    0.35    0.57
   4  13   0    0.55    0.44
  -4 -13   0    1.08    0.41
  -4  13   0    1.28    0.62
  -5  13   0    0.61    0.68
  -5 -13   0    0.78    0.42
   5  13   0   -0.10    0.53
  -6  13   0    5.49    1.84
   6  13   0    6.54    1.26
  -7  13   0   17.30    1.98
   7  13   0   14.83    1.76
  -8  13   0   10.58    1.71
   8  13   0    7.41    1.59
   0  14   0   40.38    2.15
   0  14   0   42.01    1.75
   1  14   0   74.42    2.80
  -1 -14   0   76.91    2.94
  -1  14   0   77.29    3.18
  -1  14   0   75.36    2.42
  -2  14   0    8.34    1.12
   2  14   0    6.75    0.92
  -2 -14   0    9.15    0.92
   3  14   0   10.79    1.14
  -3 -14   0    9.84    0.93
  -3  14   0   11.21    1.27
  -4 -14   0   16.91    1.04
  -4  14   0   15.99    1.55
   4  14   0   13.83    1.40
  -4 -14   0   16.24    1.07
  -5 -14   0   -0.63    0.47
  -5 -14   0    0.13    0.40
  -5  14   0   -0.51    0.52
   5  14   0   -0.44    0.45
  -6  14   0    9.93    1.52
   6  14   0   11.63    1.56
  -7  14   0   -0.70    0.79
   7  14   0    0.38    0.71
  -8  14   0   11.90    2.27
   8  14   0    9.94    1.74
   0  15   0    0.42    0.56
   0  15   0   -0.47    0.33
  -1  15   0   33.75    1.41
  -1 -15   0   36.54    1.92
   1  15   0   32.18    1.72
  -1  15   0   36.27    2.09
  -2  15   0   72.26    3.26
  -2 -15   0   68.45    2.71
   2  15   0   70.69    2.92
   3  15   0    1.09    0.61
  -3 -15   0   -0.07    0.44
  -3  15   0    0.39    0.73
  -4 -15   0   10.16    0.86
   4  15   0    7.92    1.14
  -4  15   0   13.24    1.49
   5  15   0    8.34    1.27
  -5  15   0    4.82    1.23
  -5 -15   0    7.29    0.71
  -6  15   0    1.18    0.97
   6  15   0    2.25    0.82
   7  15   0    4.15    1.14
  -7  15   0    3.52    1.20
  -8  15   0   12.54    3.26
   8  15   0    8.71    2.09
   0 -16   0   22.16    1.56
   0  16   0   18.65    1.18
   0  16   0   20.25    1.60
   1  16   0   11.11    1.07
  -1  16   0   12.81    1.40
  -1 -16   0   14.98    1.26
  -1  16   0   12.32    0.83
  -2 -16   0   12.14    1.16
  -2  16   0    9.80    1.32
   2  16   0    9.65    1.12
  -3  16   0   18.64    1.82
   3  16   0   20.69    1.58
  -3 -16   0   19.00    1.36
  -4  16   0    0.03    0.71
  -4 -16   0    0.02    0.49
   4  16   0   -0.22    0.53
  -5 -16   0   16.16    0.98
  -5  16   0   13.25    1.70
   5  16   0   12.85    2.40
  -6  16   0   15.96    1.90
   6  16   0   14.85    1.81
  -7  16   0    0.72    1.01
   7  16   0   -1.04    0.96
   0  17   0    0.31    0.41
   0 -17   0   -0.11    0.53
  -1  17   0   18.93    1.03
  -1  17   0   19.73    1.73
  -1 -17   0   19.81    1.50
   1  17   0   18.04    1.36
  -2 -17   0   73.41    3.05
  -2  17   0   74.32    3.56
   2  17   0   79.25    3.19
   3  17   0    4.11    0.95
  -3  17   0    3.71    1.00
  -3 -17   0    4.41    0.81
   4  17   0    0.94    0.80
  -4 -17   0    0.70    0.57
  -4  17   0   -0.92    0.70
   5  17   0   11.91    1.58
  -5  17   0   11.38    1.70
   6  17   0    4.07    1.46
  -6  17   0    5.40    1.34
  -7  17   0    5.96    2.43
   7  17   0    4.25    1.40
   0 -18   0    1.63    0.80
   0  18   0    2.48    0.64
  -1  18   0    8.84    0.82
  -1  18   0   10.95    1.41
  -1 -18   0   10.38    1.31
   1  18   0   10.99    1.15
   2  18   0    0.10    0.56
  -2 -18   0   -1.36    0.57
  -2  18   0    0.38    0.72
   3  18   0    7.96    1.15
  -3 -18   0    6.37    1.06
  -3  18   0    9.11    1.43
  -4  18   0    3.47    1.11
   4  18   0    4.42    1.31
  -4 -18   0    4.29    0.87
   5  18   0    6.48    1.45
  -5  18   0    6.35    1.58
  -6  18   0   -1.71    0.94
   6  18   0    2.07    1.11
   0 -19   0   -0.58    0.63
   0  19   0    0.08    0.63
  -1  19   0    7.58    0.89
   1  19   0    8.17    1.15
  -1 -19   0    8.07    1.29
   1 -19   0    7.34    1.40
  -1  19   0    9.46    1.45
  -2 -19   0    2.14    0.90
  -2  19   0    0.54    0.83
   2  19   0    4.44    0.97
  -3  19   0    1.84    0.89
  -3 -19   0    1.68    0.78
   3  19   0    0.64    0.77
  -4  19   0    3.36    1.20
  -4 -19   0    4.08    0.91
   4  19   0    1.86    1.05
  -5  19   0    1.12    1.14
   5  19   0    0.91    0.88
  -6  19   0    9.68    2.06
   0  20   0    7.90    1.23
   0 -20   0    7.39    1.39
   1 -20   0   13.88    1.89
  -1 -20   0   12.54    1.51
   1  20   0   13.24    1.40
   2  20   0    1.50    0.86
  -2  20   0    3.41    1.22
  -2 -20   0    2.94    1.02
  -3 -20   0   14.99    1.57
   3  20   0   14.04    1.71
  -3  20   0   16.23    2.01
  -4  20   0    2.45    1.15
   4  20   0    0.92    0.95
  -5  20   0    9.99    3.10
   5  20   0    4.56    1.28
   0 -21   0    2.91    1.20
   0  21   0   -1.19    0.97
   1 -21   0    9.92    1.61
   1  21   0    8.92    1.37
  -1 -21   0    9.20    1.50
   2 -21   0    5.62    1.35
   2  21   0    5.84    1.25
  -2  21   0    7.35    1.60
  -2 -21   0    5.98    1.24
  -3 -21   0   -0.54    1.12
  -3  21   0    0.83    1.00
   3  21   0    1.18    0.98
   4  21   0   22.58    2.19
  -4  21   0   18.93    2.35
   0 -22   0   15.38    2.00
   1  22   0    3.15    1.19
   1 -22   0    4.49    1.36
  -1 -22   0    2.51    1.23
  -2 -22   0    1.57    1.28
   2  22   0    1.29    1.21
   2 -22   0    1.34    1.19
  -3  22   0   10.51    2.15
   3  22   0   10.49    1.83
   0 -23   0    0.52    1.09
  -1 -23   0    5.05    1.44
   1 -23   0    2.52    1.32
  -1   0  -1  217.90    5.31
   1   0   1  217.05    5.32
  -1   0   1  216.51    5.25
   1   0   1  213.57    5.31
  -1   0  -1  211.31    5.39
   1   0  -1  213.41    5.24
  -2   0  -1   64.85    1.86
   2   0   1   62.68    1.88
  -2   0  -1   62.02    1.86
  -2   0   1   62.73    1.79
   2   0   1   62.94    1.84
   2   0  -1   64.79    1.90
   2   0  -1   62.70    1.78
  -3   0  -1    5.62    0.46
  -3   0  -1    5.72    0.53
   3   0   1    5.48    0.43
   3   0  -1    5.58    0.49
   3   0  -1    5.76    0.41
  -3   0   1    5.43    0.41
   3   0   1    5.76    0.48
  -4   0   1  214.99    5.74
   4   0  -1  210.38    5.69
  -4   0  -1  214.68    5.81
   4   0  -1  226.37    5.99
   4   0   1  222.35    5.94
   4   0   1  203.46    5.75
  -5   0  -1   30.31    1.40
  -5   0   1   30.82    1.36
   5   0   1   33.90    1.56
   5   0  -1   32.03    1.55
   5   0  -1   28.11    1.29
   5   0   1   30.46    1.37
   6   0  -1   16.40    1.22
   6   0   1   15.81    1.15
  -6   0  -1   16.26    1.09
  -6   0   1   14.63    0.98
   7   0   1    0.32    0.38
   7   0  -1    1.17    0.60
  -7   0  -1    1.14    0.47
  -7   0   1    1.03    0.54
   8   0  -1   21.15    1.63
   8   0   1   21.77    1.61
  -8   0   1   21.84    1.77
  -8   0  -1   21.61    1.51
  -9   0  -1    3.22    0.76
   9   0   1    4.58    1.05
   9   0  -1    4.05    0.99
  -9   0   1    4.17    0.91
 -10   0  -1   11.89    1.45
  10   0  -1   13.74    1.73
 -10   0   1   13.95    1.52
  10   0   1   14.39    1.69
   0  -1  -1  130.72    3.29
   0   1   1  134.71    3.28
  -1   1   1   53.50    1.52
   1  -1   1   55.72    1.55
  -1  -1  -1   53.26    1.48
   1   1  -1   55.16    1.36
  -1  -1  -1   53.74    1.55
   1  -1   1   56.33    1.45
  -1   1  -1   55.40    1.57
   1  -1  -1   55.28    1.54
   1   1   1   54.30    1.58
  -1  -1   1   56.68    1.38
  -1   1  -1   55.86    1.46
   2   1  -1   27.76    1.03
  -2  -1  -1   26.64    0.91
   2  -1   1   26.19    0.97
  -2  -1  -1   25.12    0.98
  -2   1   1   25.43    0.94
   2  -1   1   25.70    0.91
   2   1  -1   24.61    0.81
   2   1   1   23.30    0.86
  -2  -1   1   26.43    0.82
   2  -1  -1   25.62    0.92
   2   1   1   26.01    1.00
  -2   1  -1   27.18    0.91
  -2   1  -1   25.62    0.97
  -3   1   1  176.27    5.00
   3   1  -1  174.04    4.61
   3  -1   1  192.39    5.07
   3   1  -1  180.40    4.93
  -3  -1  -1  181.47    4.76
   3  -1   1  175.79    4.80
  -3  -1  -1  172.27    4.85
   3  -1  -1  178.89    4.71
  -3   1  -1  178.42    4.74
   3   1   1  168.47    4.58
   3   1   1  182.36    4.83
   3  -1  -1  167.74    4.64
  -3  -1   1  170.40    4.52
  -4   1   1   29.21    1.24
   4  -1   1   27.19    1.24
   4   1  -1   28.44    1.36
  -4  -1  -1   30.39    1.23
  -4  -1  -1   27.33    1.27
   4   1  -1   29.31    1.13
   4  -1   1   27.70    1.26
  -4  -1   1   29.73    1.18
   4  -1  -1   29.61    1.24
   4   1   1   30.48    1.40
  -4   1  -1   28.04    1.29
   4   1   1   29.74    1.21
   4  -1  -1   30.14    1.33
   5   1  -1   23.97    1.36
   5  -1   1   21.82    1.21
  -5   1   1   25.80    1.24
  -5  -1  -1   22.32    1.13
   5   1  -1   21.46    1.04
   5   1   1   23.99    1.15
   5   1   1   25.36    1.39
   5  -1  -1   24.68    1.21
  -5  -1   1   24.62    1.14
  -5   1  -1   23.66    1.26
   5  -1  -1   25.80    1.33
   6   1  -1   14.33    0.92
   6   1  -1   16.64    1.19
   6  -1   1   15.12    1.13
  -6  -1  -1   14.42    1.00
  -6   1   1   14.43    1.02
  -6   1  -1   15.29    1.08
   6  -1  -1   17.30    1.22
  -6  -1   1   13.93    0.94
   6   1   1   15.13    1.20
  -7  -1  -1    2.08    0.62
   7   1  -1    1.99    0.63
  -7   1   1    1.86    0.59
   7  -1   1    2.03    0.66
  -7   1  -1    2.01    0.64
  -7  -1   1    1.83    0.52
   7   1   1    0.98    0.57
   7  -1  -1    2.26    0.63
   8  -1   1    1.50    0.66
   8   1  -1    1.11    0.52
  -8  -1  -1    2.15    0.62
  -8   1   1    0.86    0.56
   8  -1  -1    1.66    0.60
  -8   1  -1    1.98    0.62
  -8  -1   1    0.66    0.49
   8   1   1    1.89    0.74
  -9  -1  -1    6.80    1.06
  -9   1   1    5.35    1.05
   9   1  -1    7.68    1.23
   9  -1   1    6.99    1.19
   9  -1  -1    6.84    1.17
   9   1   1    8.46    1.25
  -9  -1   1    6.16    1.04
  -9   1  -1    6.94    1.09
  10  -1   1    1.44    0.81
 -10  -1  -1    2.35    0.88
 -10   1   1    3.24    0.90
  10   1  -1    3.56    1.17
 -10  -1   1    1.43    0.96
  10  -1  -1    2.09    1.00
 -10   1  -1    1.54    0.88
  10   1   1    1.55    0.82
   0  -2  -1   83.74    2.22
   0  -2   1   85.73    2.16
   0  -2  -1   82.11    2.17
   0   2  -1   84.88    2.16
   0   2   1   84.40    2.24
   0   2   1   82.47    2.17
  -1  -2  -1  189.75    4.71
   1  -2   1  187.64    4.81
  -1   2   1  192.23    4.70
   1   2  -1  188.90    4.82
  -1  -2  -1  186.95    4.82
  -1   2   1  191.26    4.83
   1  -2   1  187.77    4.57
   1   2   1  204.57    5.04
  -1   2  -1  199.36    5.14
   1   2   1  205.38    5.16
  -1  -2   1  202.25    4.87
   1  -2  -1  202.84    5.14
   1  -2  -1  202.44    5.02
  -2  -2  -1  273.20    6.95
   2   2  -1  325.54    7.69
   2   2  -1  267.71    6.81
   2  -2   1  269.86    6.92
  -2   2   1  272.99    7.12
  -2  -2  -1  282.97    7.17
   2  -2   1  274.40    7.12
  -2   2  -1  269.25    6.87
  -2  -2   1  277.35    6.55
   2   2   1  261.66    6.67
   2  -2  -1  268.23    6.83
   2   2   1  265.90    7.10
  -3  -2  -1   62.90    1.88
   3  -2   1   62.03    1.91
   3   2  -1   67.74    2.17
   3  -2   1   59.04    2.01
  -3   2   1   61.83    2.03
   3   2  -1   60.51    1.75
  -3  -2  -1   55.83    2.03
   3  -2  -1   62.24    2.01
   3  -2  -1   64.56    2.14
   3   2   1   59.63    2.10
   3   2   1   60.80    1.86
  -3  -2   1   61.04    1.78
  -3   2  -1   63.07    2.08
  -4  -2  -1  126.74    4.00
   4   2  -1  136.77    3.68
  -4  -2  -1  140.31    3.82
   4   2  -1  139.83    4.15
   4  -2   1  128.06    3.94
   4  -2   1  143.30    3.92
  -4   2   1  133.73    3.98
   4   2   1  144.42    4.25
  -4   2  -1  138.55    4.13
   4  -2  -1  146.23    4.06
   4  -2  -1  131.85    4.01
  -4  -2   1  141.25    3.80
   4   2   1  137.54    3.88
   5   2  -1   51.30    2.19
  -5  -2  -1   52.94    1.88
   5   2  -1   48.78    1.74
  -5   2   1   47.04    1.97
   5  -2   1   51.30    1.97
  -5   2  -1   50.69    2.03
   5   2   1   47.75    1.79
   5  -2  -1   49.51    1.96
   5   2   1   48.92    2.12
  -5  -2   1   49.49    1.74
  -6  -2  -1   10.16    0.83
   6   2  -1   11.83    0.80
  -6   2   1   10.23    0.93
   6   2  -1   12.26    1.15
   6  -2   1   12.07    1.01
  -6  -2   1   11.32    0.82
  -6   2  -1   12.15    1.01
   6  -2  -1   11.59    0.99
  -7   2   1   28.95    1.69
   7   2  -1   32.77    1.95
  -7  -2  -1   29.88    1.55
  -7   2  -1   29.95    1.73
  -7  -2   1   33.41    1.55
   7  -2  -1   32.28    1.78
   7   2   1   29.97    1.91
  -8   2   1    9.24    1.07
   8   2  -1   10.23    1.34
   8  -2   1    7.24    1.12
  -8  -2  -1    8.61    0.93
  -8  -2   1    9.33    0.91
   8   2   1    8.87    1.13
   8  -2  -1   10.08    1.21
  -8   2  -1    7.48    1.07
   9  -2   1    2.66    0.94
  -9  -2  -1    2.20    0.75
  -9   2   1    2.78    0.85
   9  -2  -1    3.24    0.79
  -9  -2   1    2.05    1.10
   9   2   1    1.90    0.91
  -9   2  -1    1.82    0.83
 -10   2   1   13.12    1.59
  10   2  -1   10.13    1.65
 -10  -2  -1   10.68    1.49
  10  -2   1   13.76    1.58
 -10  -2   1   11.30    1.51
  10  -2  -1   12.68    1.57
 -10   2  -1   13.49    1.60
  10   2   1   11.63    1.63
   0   3  -1  318.87    7.89
   0   3   1  318.45    7.87
   0   3   1  318.34    7.97
   0  -3  -1  320.21    7.86
   0  -3  -1  321.31    7.95
   0   3  -1  333.78    7.82
   0  -3   1  319.06    7.88
  -1  -3  -1   87.99    2.43
   1  -3   1   90.16    2.54
  -1  -3  -1   89.77    2.54
  -1   3   1   92.55    2.38
   1   3  -1   93.58    2.55
  -1   3   1   92.99    2.59
  -1   3  -1   92.62    2.62
  -1  -3   1   95.82    2.37
   1  -3  -1   94.18    2.42
   1   3   1   92.13    2.49
  -1  -3   1   94.97    2.37
   1   3   1   92.35    2.62
   1  -3  -1   95.93    2.64
  -1  -3   1   92.45    2.57
  -2   3   1  640.15   15.75
  -2  -3  -1  620.54   15.73
   2  -3   1  623.89   15.72
   2   3  -1  660.03   15.79
   2   3  -1  636.73   15.32
  -2  -3  -1  645.37   15.49
   2  -3   1  649.06   15.38
  -2  -3   1  635.24   15.37
   2   3   1  647.44   15.84
  -2   3  -1  640.70   15.82
   2  -3  -1  639.76   15.78
   2   3   1  637.61   15.55
   2  -3  -1  651.64   15.59
  -3  -3  -1   92.22    2.90
   3   3  -1   91.95    2.46
  -3   3   1   91.43    2.87
   3   3  -1   94.86    2.96
   3  -3   1   93.39    2.60
  -3  -3  -1   95.26    2.62
   3  -3   1   87.44    2.82
  -3  -3   1   95.15    2.48
   3   3   1   94.52    2.95
   3  -3  -1   91.94    2.64
   3   3   1   92.19    2.60
   3  -3  -1   88.32    2.80
  -3   3  -1   93.28    2.90
   4   3  -1   43.89    1.86
  -4   3   1   46.19    1.79
   4  -3   1   37.31    1.66
   4  -3   1   42.55    1.56
   4   3  -1   42.99    1.39
  -4  -3  -1   44.39    1.52
   4  -3  -1   43.16    1.58
   4  -3  -1   39.06    1.64
   4   3   1   40.26    1.46
  -4  -3   1   42.19    1.38
   4   3   1   42.77    1.82
  -4   3  -1   41.99    1.74
  -5  -3  -1   55.91    1.93
   5   3  -1   55.85    2.35
   5  -3   1   54.20    2.03
  -5   3   1   56.39    2.22
   5   3  -1   52.31    1.80
   5   3   1   51.53    2.26
  -5   3  -1   56.96    2.23
  -5  -3   1   54.81    1.80
   5   3   1   53.69    1.90
   5  -3  -1   52.00    2.01
   6  -3   1   50.58    2.05
  -6   3   1   47.07    2.15
  -6  -3  -1   47.80    1.88
   6   3  -1   50.09    2.37
   6   3   1   47.88    2.28
   6   3   1   45.60    1.85
  -6  -3   1   47.23    1.75
   6  -3  -1   50.47    2.08
  -6   3  -1   44.93    2.12
   7   3  -1    6.11    1.01
  -7  -3  -1    6.03    0.73
   7  -3   1    5.97    0.84
  -7   3   1    5.67    0.86
   7   3  -1    4.17    0.69
   7   3   1    6.86    1.02
  -7  -3   1    5.38    0.64
  -7   3  -1    6.73    0.93
   7  -3  -1    4.92    0.80
  -8   3   1    8.78    1.09
   8  -3   1   10.60    1.14
  -8  -3  -1    9.59    0.95
   8   3  -1    8.79    1.25
  -8   3  -1    9.38    1.15
   8   3   1   10.40    1.32
   8  -3  -1   13.42    1.20
  -8  -3   1    9.82    0.89
  -9  -3  -1   24.41    1.57
   9   3  -1   25.74    2.02
   9  -3   1   28.35    1.86
  -9   3   1   21.07    1.73
   9   3   1   22.16    1.95
  -9  -3   1   24.05    1.47
  -9   3  -1   25.96    1.86
   9  -3  -1   24.56    1.79
 -10  -3  -1    3.02    1.00
 -10   3   1    3.58    1.20
  10  -3   1    2.34    1.68
  10   3  -1    1.40    0.86
  10   3   1    1.74    1.05
 -10   3  -1    3.26    1.08
  10  -3  -1    0.65    0.87
   0  -4   1    1.11    0.20
   0  -4  -1    1.37    0.19
   0   4   1    1.06    0.23
   0  -4   1    1.37    0.16
   0  -4  -1    1.27    0.22
   0   4  -1    1.30    0.19
   0   4  -1    1.23    0.21
   0   4   1    1.24    0.19
  -1   4   1  121.72    3.05
  -1   4   1  120.57    3.34
   1  -4   1  116.91    3.27
  -1  -4  -1  118.77    3.26
   1   4  -1  115.71    3.24
   1   4  -1  118.19    3.07
  -1  -4  -1  119.02    3.19
  -1  -4  -1  118.05    3.15
   1  -4  -1  106.69    3.12
   1  -4  -1  114.80    3.15
  -1  -4   1  109.19    3.05
  -1   4  -1  112.03    3.14
  -1  -4   1  113.75    2.89
   1   4   1  114.55    3.13
   2  -4   1  305.03    7.35
   2   4  -1  303.93    7.39
  -2  -4  -1  312.99    7.58
  -2  -4  -1  296.53    7.83
   2  -4   1  295.56    7.81
  -2   4   1  301.89    7.87
   2   4  -1  310.08    7.88
  -2   4  -1  305.49    7.82
   2  -4  -1  297.47    7.76
  -2  -4   1  294.66    7.73
  -2  -4   1  304.08    7.33
   2  -4  -1  298.22    7.46
   2   4   1  298.72    7.50
   2   4   1  310.58    7.84
  -3  -4  -1  129.97    3.42
   3   4  -1  131.02    3.84
   3  -4   1  116.87    3.69
   3   4  -1  128.54    3.25
   3  -4   1  127.74    3.34
  -3  -4  -1  119.49    3.72
  -3   4   1  127.70    3.78
   3   4   1  125.28    3.79
   3   4   1  125.36    3.39
  -3   4  -1  120.83    3.73
   3  -4  -1  118.85    3.65
  -3  -4   1  129.35    3.22
   3  -4  -1  127.40    3.46
   4  -4   1    8.35    0.56
   4   4  -1    8.84    0.82
   4   4  -1    7.93    0.44
  -4   4   1    6.99    0.70
  -4  -4  -1    7.90    0.52
  -4   4  -1    7.98    0.75
  -4  -4   1    8.73    0.47
   4   4   1    6.99    0.75
   4   4   1    8.35    0.53
   4  -4  -1    7.83    0.60
   5   4  -1   58.24    2.46
   5  -4   1   54.78    2.00
  -5   4   1   54.74    2.27
   5   4  -1   55.19    1.80
  -5  -4  -1   57.15    1.95
   5  -4  -1   57.93    2.06
   5   4   1   54.29    2.39
  -5   4  -1   57.48    2.35
   5   4   1   54.89    1.92
   6  -4   1    3.41    0.59
   6   4  -1    3.99    0.50
  -6   4   1    3.92    0.73
  -6  -4  -1    4.21    0.56
   6   4  -1    4.56    0.85
  -6   4  -1    5.02    0.93
  -6  -4   1    5.39    0.53
   6   4   1    3.80    0.80
   6   4   1    3.84    0.59
   6  -4  -1    3.57    0.62
  -7  -4  -1    5.94    0.69
   7   4  -1    6.23    1.04
   7   4  -1    4.60    0.69
  -7   4   1    5.45    0.86
   7  -4   1    4.77    0.77
  -7  -4   1    4.99    0.57
   7   4   1    4.64    0.94
   7  -4  -1    5.91    0.88
  -7   4  -1    5.29    0.93
   8  -4   1    1.88    0.68
  -8   4   1    1.62    0.63
   8   4  -1    2.46    0.74
  -8  -4  -1    1.23    0.47
  -8   4  -1    2.17    0.74
  -8  -4   1    1.22    0.44
   8  -4  -1    0.98    0.63
   8   4   1    1.00    0.61
   9   4  -1    6.96    1.30
   9  -4   1    6.83    1.18
  -9   4   1    8.80    1.29
  -9  -4  -1    6.25    1.10
   9  -4  -1    7.35    1.19
  -9  -4   1    5.54    0.97
   9   4   1    8.06    1.38
  -9   4  -1    6.99    1.22
  10   4  -1    7.77    1.59
 -10   4   1    7.19    1.54
  10  -4   1    6.29    1.22
  10  -4  -1    4.37    1.25
  10   4   1    3.43    1.06
 -10   4  -1    4.60    1.16
   0  -5  -1  190.83    4.98
   0  -5  -1  188.32    4.83
   0  -5   1  195.04    4.77
   0  -5   1  189.88    4.90
   0   5   1  189.78    5.01
   0   5  -1  189.33    4.78
   0   5   1  184.79    4.84
   0   5  -1  180.92    4.91
  -1   5   1    0.46    0.11
  -1   5   1    0.53    0.22
   1  -5   1    0.62    0.23
   1   5  -1    0.42    0.16
  -1  -5  -1    0.53    0.19
  -1  -5  -1    0.30    0.15
  -1  -5  -1    0.32    0.16
   1   5  -1    0.50    0.16
   1   5   1    0.34    0.20
   1  -5  -1    0.76    0.21
  -1  -5   1    0.69    0.15
  -1   5  -1    0.76    0.23
   1  -5  -1    0.65    0.14
  -1   5  -1    0.55    0.08
  -1  -5   1    0.92    0.21
   2  -5   1  281.37    7.43
  -2   5   1  286.54    7.52
  -2  -5  -1  281.03    7.43
  -2  -5  -1  279.36    7.15
   2   5  -1  292.07    7.49
   2   5   1  281.78    7.47
   2  -5  -1  287.25    7.02
  -2  -5   1  280.67    6.99
   2   5   1  285.41    7.15
  -2  -5   1  291.90    7.01
  -2  -5   1  277.76    7.38
   2  -5  -1  280.80    7.44
  -2   5  -1  285.62    7.50
  -3  -5  -1   18.45    1.04
  -3   5   1   17.76    1.05
   3   5  -1   17.98    1.08
  -3  -5  -1   18.86    0.80
   3  -5   1   17.34    1.01
   3  -5   1   18.21    0.69
   3   5  -1   19.79    0.68
   3   5   1   17.71    0.77
   3   5   1   20.38    1.12
  -3   5  -1   17.62    1.05
   3  -5  -1   17.78    0.77
   3  -5  -1   15.89    0.96
  -3  -5   1   18.72    0.66
   4   5  -1    7.71    0.77
   4   5  -1    6.62    0.41
  -4   5   1    7.89    0.76
  -4  -5  -1    6.64    0.57
   4  -5   1    6.98    0.51
   4  -5  -1    7.60    0.59
   4  -5  -1    6.92    0.54
  -4   5  -1    8.02    0.78
   4   5   1    6.40    0.48
   4   5   1    6.64    0.74
  -4  -5   1    7.77    0.42
   5   5  -1   19.63    0.83
   5  -5   1   18.90    0.98
  -5   5   1   17.25    1.25
  -5  -5  -1   18.04    0.92
   5   5  -1   18.34    1.33
  -5   5  -1   17.52    1.23
   5  -5  -1   15.29    0.93
   5  -5  -1   17.38    1.28
   5   5   1   15.99    0.87
   5   5   1   17.49    1.29
  -5  -5   1   18.40    0.79
  -6   5   1   79.70    3.12
   6  -5   1   77.96    2.70
  -6  -5  -1   79.60    2.57
   6   5  -1   75.83    2.42
   6   5  -1   80.96    3.30
   6  -5  -1   82.88    2.77
   6   5   1   76.62    2.58
   6   5   1   80.47    3.29
  -6  -5   1   75.97    2.39
  -6   5  -1   77.99    3.13
   7  -5   1    5.42    0.77
  -7  -5  -1    5.79    0.67
   7   5  -1    5.31    0.80
   7   5  -1    4.67    1.01
  -7   5   1    4.88    0.92
  -7   5  -1    5.53    0.95
   7   5   1    5.94    0.97
  -7  -5   1    4.49    0.53
   7  -5  -1    6.33    0.79
   8   5  -1    8.35    1.26
   8  -5   1    7.91    0.98
  -8  -5  -1    5.62    0.80
  -8   5   1    6.23    1.15
  -8   5  -1    6.83    1.07
   8   5   1    7.24    1.13
   8  -5  -1    7.14    1.01
  -8  -5   1    7.58    0.72
   9   5  -1    3.57    1.01
  -9  -5  -1    2.35    0.70
  -9   5   1    1.44    0.78
   9  -5   1    1.78    0.72
   9  -5  -1    2.51    0.89
  -9  -5   1    3.01    0.68
  -9   5  -1    2.92    0.99
   9   5   1    1.17    0.77
 -10   5   1    3.64    1.16
  10   5  -1    1.29    1.07
  10  -5   1    0.34    0.87
  10   5   1    1.77    1.02
 -10   5  -1    3.61    1.18
  10  -5  -1    3.48    1.01
   0  -6   1   11.23    0.52
   0  -6  -1   12.08    0.58
   0   6   1   12.31    0.60
   0   6   1   11.52    0.69
   0   6  -1   10.15    0.54
   0  -6   1   11.13    0.62
   0  -6  -1   11.30    0.66
   1   6  -1   96.51    2.72
  -1   6   1   94.52    2.58
   1  -6   1   93.54    2.86
   1   6  -1   96.15    2.82
  -1  -6  -1   96.49    2.78
  -1  -6  -1  100.03    2.85
  -1  -6  -1   95.15    2.78
  -1   6   1   94.77    2.96
  -1  -6   1   95.91    2.69
  -1   6  -1   96.46    2.46
   1  -6  -1   96.99    2.58
   1   6   1   97.26    2.89
  -1   6  -1  100.56    2.98
   1  -6  -1   96.85    2.94
  -1  -6   1   96.80    2.82
  -2  -6  -1   50.95    1.66
  -2  -6  -1   48.63    1.84
   2   6  -1   53.99    1.90
   2  -6   1   49.17    1.84
  -2   6   1   49.50    1.91
  -2  -6  -1   46.54    1.59
   2  -6  -1   55.02    1.49
  -2  -6   1   51.93    1.54
  -2  -6   1   52.58    1.54
   2  -6  -1   48.97    1.87
  -2   6  -1   50.90    1.95
   2   6   1   48.76    1.89
  -3  -6  -1   36.54    1.31
   3  -6   1   38.80    1.09
   3   6  -1   36.80    1.68
  -3   6   1   38.45    1.70
   3  -6   1   38.12    1.14
   3  -6  -1   36.64    1.23
   3   6   1   38.87    1.33
  -3   6  -1   37.22    1.68
  -3  -6   1   37.08    1.16
   3   6   1   37.46    1.69
  -3  -6   1   38.47    1.20
  -4  -6  -1   17.41    0.93
   4  -6   1   17.71    0.78
  -4   6   1   16.27    1.13
   4   6  -1   17.36    0.70
   4  -6   1   17.38    0.76
   4   6  -1   18.74    1.22
  -4  -6   1   16.80    0.67
   4   6   1   19.53    1.24
   4  -6  -1   15.58    0.81
  -4   6  -1   19.69    1.22
   4   6   1   16.79    0.81
   4  -6  -1   17.62    0.87
  -5   6   1   85.93    3.21
   5   6  -1   84.01    2.42
  -5  -6  -1   83.25    2.60
   5   6  -1   84.03    3.29
   5  -6   1   87.03    2.63
   5   6   1   78.32    2.49
   5   6   1   80.30    3.18
  -5   6  -1   82.07    3.13
   5  -6  -1   82.63    2.56
  -5  -6   1   80.31    2.28
   5  -6  -1   77.90    2.64
   6  -6   1   41.90    1.70
  -6   6   1   40.06    2.16
   6   6  -1   43.79    2.34
   6   6  -1   42.13    1.49
  -6  -6  -1   44.93    1.65
   6  -6  -1   39.24    1.81
   6  -6  -1   41.56    1.71
   6   6   1   37.69    2.15
   6   6   1   39.29    2.20
  -6  -6   1   42.05    1.59
  -6   6  -1   40.58    2.16
  -7  -6  -1    2.56    0.51
  -7   6   1    2.87    0.77
   7  -6   1    1.74    0.48
   7   6  -1    1.79    0.44
   7   6  -1    2.31    0.80
   7   6   1    3.31    0.62
   7  -6  -1    4.13    0.72
  -7   6  -1    2.48    0.81
   7   6   1    2.63    0.87
  -7  -6   1    2.74    0.43
  -8  -6  -1    0.29    0.46
   8   6  -1   -0.18    0.56
  -8   6   1    1.49    0.68
   8  -6   1    1.27    0.57
   8   6   1    1.00    0.80
  -8   6  -1   -0.48    0.47
   8  -6  -1   -0.12    0.48
  -9   6   1   18.41    2.51
  -9  -6  -1   16.51    1.24
   9   6  -1   14.39    1.70
   9  -6   1   19.21    1.52
  -9   6  -1   17.73    1.78
   9  -6  -1   17.67    1.54
   9   6   1   17.07    1.85
  10   6  -1    0.63    1.05
 -10   6   1    0.57    1.16
  10  -6   1    2.12    0.95
  10   6   1    1.55    1.11
  10  -6  -1    2.04    0.92
 -10   6  -1    1.34    0.99
   0   7  -1   52.02    1.66
   0  -7   1   54.08    1.71
   0  -7   1   52.99    1.79
   0   7   1   51.37    1.88
   0  -7  -1   53.10    1.69
   0  -7  -1   53.20    1.85
   0   7  -1   56.64    1.88
   0   7   1   52.71    1.72
   1   7  -1   25.02    1.08
  -1   7   1   22.96    0.86
  -1   7   1   21.83    1.14
  -1  -7  -1   22.19    1.01
  -1  -7  -1   22.40    1.04
  -1  -7  -1   23.09    1.03
   1   7  -1   23.18    0.99
  -1  -7   1   25.19    1.00
  -1  -7   1   26.33    1.07
   1  -7  -1   23.86    1.15
  -1   7  -1   23.05    1.14
   1  -7  -1   25.83    0.89
  -1   7  -1   24.05    0.79
   1   7   1   24.44    1.11
  -2  -7  -1  218.09    5.64
   2   7  -1  216.45    5.91
   2  -7   1  206.60    5.87
  -2   7   1  214.35    5.34
  -2   7   1  212.04    6.02
  -2  -7  -1  209.71    5.86
   2   7   1  216.90    5.97
  -2  -7   1  211.40    5.85
  -2  -7   1  221.19    5.52
   2  -7  -1  206.45    5.93
  -2  -7   1  219.16    5.53
  -2   7  -1  213.26    6.03
   2  -7  -1  214.70    5.35
   3   7  -1   11.21    0.89
  -3   7   1   11.35    0.91
  -3   7  -1   12.96    0.96
   3  -7  -1   13.57    0.57
   3   7   1   12.47    0.95
  -3  -7   1   12.96    0.59
  -3  -7   1   12.94    0.58
   3   7   1   11.85    0.66
   4   7  -1   55.57    2.37
  -4   7   1   55.06    2.34
   4  -7   1   51.09    1.59
  -4  -7  -1   55.23    1.79
   4  -7   1   52.90    1.57
   4  -7  -1   50.96    1.62
  -4  -7   1   53.55    1.58
  -4  -7   1   49.72    1.51
  -4   7  -1   49.86    2.25
   4   7   1   51.81    2.29
   4  -7  -1   51.71    1.68
   4   7   1   50.14    1.73
  -5  -7  -1   28.42    1.19
  -5   7   1   32.34    1.84
   5  -7   1   29.03    1.20
   5  -7   1   30.35    1.43
   5   7  -1   28.73    1.05
   5   7  -1   34.08    1.87
   5  -7  -1   30.31    1.32
  -5   7  -1   32.32    1.85
   5   7   1   31.19    1.82
   5  -7  -1   31.55    1.27
   5   7   1   27.09    1.21
  -5  -7   1   30.54    1.04
   6  -7   1   73.71    2.56
  -6   7   1   77.71    3.18
  -6  -7  -1   73.49    2.40
   6  -7   1   77.01    2.48
   6   7  -1   76.29    3.32
   6   7  -1   71.84    2.19
   6   7   1   71.28    3.16
   6   7   1   71.58    2.37
  -6  -7   1   68.87    2.05
  -6   7  -1   75.59    3.16
   6  -7  -1   66.95    2.50
   6  -7  -1   71.34    2.43
   7   7  -1   16.13    1.59
  -7   7   1   16.26    1.50
   7  -7   1   15.93    1.05
   7   7  -1   16.80    0.83
  -7  -7  -1   16.34    0.94
   7   7   1   15.80    1.04
   7   7   1   17.26    1.57
  -7   7  -1   16.66    1.52
   7  -7  -1   19.12    1.19
   8   7  -1    8.19    1.30
   8  -7   1    5.98    0.89
  -8   7   1    5.35    1.14
  -8  -7  -1    7.26    0.71
   8   7   1    8.62    1.47
  -8   7  -1    8.07    1.29
   8  -7  -1    7.04    0.96
  -8  -7   1    5.99    0.56
   9  -7   1    2.25    0.79
  -9   7   1    2.69    0.90
   9   7  -1    1.41    0.92
   9  -7  -1    3.04    0.87
  -9   7  -1    3.06    1.14
   9   7   1    2.61    1.06
 -10   7   1    1.13    1.03
  10   7  -1    0.37    0.96
  10   7   1   -1.10    0.86
 -10   7  -1   -0.81    0.93
   0  -8   1    2.19    0.36
   0   8  -1    2.04    0.30
   0   8   1    2.01    0.41
   0  -8   1    1.61    0.28
   0   8  -1    1.84    0.38
   0  -8  -1    1.91    0.32
   0  -8  -1    2.13    0.44
   0   8   1    2.15    0.55
  -1  -8  -1   57.86    1.93
   1   8  -1   52.88    1.85
   1  -8   1   53.46    1.96
   1   8  -1   53.27    1.90
  -1  -8  -1   54.84    1.89
  -1   8   1   51.31    2.05
  -1   8   1   52.39    1.65
  -1  -8  -1   51.59    1.87
   1  -8  -1   53.83    1.59
  -1   8  -1   49.62    1.96
  -1  -8   1   51.22    1.79
  -1   8  -1   52.99    1.51
  -1  -8   1   51.99    1.74
   1   8   1   52.13    1.87
   1  -8  -1   48.86    1.93
  -2   8   1   93.31    3.22
  -2   8   1   96.99    2.55
   2   8  -1   95.76    3.11
  -2  -8  -1   91.85    3.04
  -2  -8  -1   92.70    2.84
  -2  -8  -1   97.01    2.88
  -2  -8   1   89.21    2.97
  -2  -8   1   96.30    2.71
  -2  -8   1   94.82    2.73
   2  -8  -1   94.48    2.50
  -2   8  -1   96.05    3.20
   2   8   1   95.85    3.13
   3   8  -1   47.76    2.06
  -3   8   1   50.09    2.16
  -3  -8  -1   48.47    1.68
  -3  -8  -1   48.33    1.72
   3   8   1   46.14    2.04
  -3  -8   1   48.13    1.53
  -3   8  -1   46.16    2.07
  -3  -8   1   49.80    1.54
   3  -8  -1   49.04    1.41
   4   8  -1   41.32    2.02
  -4  -8  -1   39.06    1.45
  -4   8   1   38.33    1.98
   4   8   1   36.34    1.41
   4  -8  -1   37.14    1.28
  -4   8  -1   38.43    1.95
  -4  -8   1   37.96    1.25
   4   8   1   41.24    2.00
   4  -8  -1   39.74    1.26
  -4  -8   1   38.27    1.23
  -5   8   1  127.23    4.54
  -5  -8  -1  134.25    3.70
   5  -8   1  128.52    3.51
   5   8  -1  130.71    4.59
   5  -8   1  128.25    3.46
   5  -8  -1  127.63    3.69
   5   8   1  124.41    3.67
   5   8   1  134.86    4.61
  -5  -8   1  130.41    3.43
  -5  -8   1  128.03    3.37
  -5   8  -1  130.20    4.54
   5  -8  -1  127.13    3.67
   6  -8   1    9.49    0.69
   6   8  -1    9.70    1.21
  -6   8   1    9.34    1.17
  -6  -8  -1   10.25    0.72
   6  -8   1    9.90    0.77
  -6  -8   1    9.95    0.55
  -6  -8   1   10.25    0.50
  -6   8  -1   11.14    1.16
   6   8   1   10.51    1.24
   6   8   1    9.85    0.78
   6  -8  -1   10.13    0.88
   6  -8  -1   10.57    0.76
   7  -8   1   24.62    1.36
   7   8  -1   26.93    2.03
   7  -8   1   27.05    1.28
  -7  -8  -1   24.29    1.12
  -7   8   1   24.76    1.89
  -7  -8   1   24.92    0.82
   7  -8  -1   24.80    1.29
   7   8   1   26.16    1.97
   7  -8  -1   25.37    1.78
  -7   8  -1   29.16    1.94
   8  -8   1   -0.27    0.48
  -8   8   1    0.57    0.63
   8   8  -1    0.54    0.71
  -8  -8  -1    0.55    0.41
   8  -8  -1    0.59    0.54
  -8   8  -1    0.05    0.66
   8   8   1   -0.06    0.58
  -9   8   1    2.47    1.11
   9   8  -1    1.98    1.11
   9  -8   1    1.71    0.94
   9  -8  -1    1.05    0.76
   9   8   1    2.13    0.89
  -9   8  -1   -0.33    0.87
 -10   8   1    0.79    1.02
  10   8  -1    0.26    1.19
 -10   8  -1    2.58    1.26
  10   8   1   -0.66    1.02
   0  -9   1  158.57    4.27
   0   9   1  150.20    4.37
   0   9   1  156.22    4.70
   0  -9  -1  159.91    4.37
   0   9  -1  165.99    4.62
   0  -9  -1  159.49    4.60
   0   9  -1  163.89    4.64
   0  -9   1  157.33    4.51
  -1   9   1   28.76    1.48
  -1  -9  -1   29.57    1.31
   1   9  -1   31.62    1.35
   1   9  -1   29.61    1.32
  -1  -9  -1   30.17    1.49
  -1  -9  -1   31.30    1.36
   1  -9   1   27.00    1.37
  -1   9   1   30.29    1.12
  -1  -9   1   30.32    1.25
   1  -9  -1   30.34    1.09
  -1   9  -1   29.94    1.48
  -1   9  -1   29.25    1.03
   1   9   1   32.25    1.39
  -2  -9  -1   18.91    0.96
  -2   9   1   17.11    1.17
  -2  -9  -1   18.76    0.96
   2   9  -1   17.38    1.09
  -2   9   1   18.32    0.71
  -2  -9   1   17.72    0.84
   2  -9  -1   17.10    0.65
  -2  -9   1   16.73    0.85
   2   9   1   17.93    1.10
  -2   9  -1   17.54    1.17
   3   9  -1   58.33    2.36
  -3   9   1   57.33    2.45
  -3  -9  -1   55.66    1.94
  -3  -9  -1   56.38    1.97
  -3  -9   1   55.82    1.79
  -3  -9   1   57.42    1.82
  -3   9  -1   58.51    2.44
   3   9   1   57.60    2.40
  -4   9   1   74.59    3.09
  -4  -9  -1   78.06    2.43
  -4  -9  -1   73.89    2.45
   4   9  -1   80.90    4.06
   4  -9  -1   70.77    1.98
   4  -9  -1   70.77    2.01
  -4   9  -1   71.88    2.98
  -4  -9   1   74.46    2.11
   4   9   1   75.11    3.18
  -4  -9   1   74.96    2.14
  -5   9   1   29.87    1.91
  -5  -9  -1   33.83    1.39
  -5  -9  -1   31.06    1.28
   5   9  -1   32.72    1.97
   5  -9  -1   32.00    1.15
   5   9   1   35.01    2.02
  -5  -9   1   30.15    1.03
  -5   9  -1   31.46    1.89
   5  -9  -1   32.30    1.18
  -5  -9   1   32.96    1.07
  -6   9   1   25.64    1.84
   6  -9   1   27.12    1.01
   6  -9   1   26.61    1.02
   6   9  -1   23.82    1.83
  -6  -9  -1   27.67    1.15
   6  -9  -1   26.56    1.24
   6   9   1   29.65    1.98
  -6   9  -1   27.42    1.87
   6  -9  -1   25.35    1.13
   7   9  -1    2.24    0.75
   7  -9   1    3.12    0.73
  -7  -9  -1    2.92    0.48
   7  -9   1    2.89    0.57
  -7   9   1    1.66    0.72
   7   9   1    3.15    0.92
  -7   9  -1    2.65    0.88
   7  -9  -1    3.13    0.58
  -8  -9  -1    3.75    0.65
   8  -9   1    4.93    0.75
  -8   9   1    6.37    1.27
   8   9  -1    5.70    1.26
   8  -9  -1    3.98    0.71
   8   9   1    3.59    1.06
  -8   9  -1    3.89    1.06
   9   9  -1   -0.10    0.89
  -9   9   1   -0.06    0.83
   9   9   1   -0.71    0.72
  -9   9  -1   -0.31    0.75
   0 -10  -1   11.46    0.74
   0  10   1   12.63    0.77
   0  10  -1   14.38    0.79
   0  10   1   13.64    0.99
   0 -10   1   11.92    0.85
   0  10  -1   12.43    0.91
  -1  10   1   32.42    1.20
  -1 -10  -1   32.80    1.47
  -1 -10  -1   29.03    1.34
  -1  10   1   32.28    1.62
   1  10  -1   30.87    1.41
   1  10  -1   29.10    1.41
  -1 -10  -1   30.14    1.40
   1  10   1   28.37    1.36
  -1 -10   1   27.35    1.25
  -1  10  -1   30.54    1.53
  -1  10  -1   30.17    1.06
  -1 -10   1   28.25    1.26
   1 -10  -1   30.09    1.11
   2  10  -1   39.51    1.78
  -2 -10  -1   39.86    1.63
  -2  10   1   39.80    1.93
  -2 -10  -1   40.27    1.64
  -2  10   1   41.67    1.29
  -2 -10   1   38.78    1.50
   2  10   1   41.69    1.83
   2 -10  -1   42.26    1.26
  -2 -10   1   41.28    1.58
  -2  10  -1   40.13    1.93
  -3 -10  -1   27.62    1.27
   3  10  -1   26.96    1.58
  -3  10   1   28.20    1.67
  -3 -10  -1   29.99    1.28
  -3 -10   1   26.31    1.09
  -3  10  -1   25.29    1.56
   3  10   1   25.67    1.53
  -3 -10   1   25.05    1.05
   4  10  -1   84.37    3.33
  -4  10   1   83.82    3.41
  -4 -10  -1   84.68    2.66
  -4 -10  -1   85.29    2.70
  -4  10  -1   87.80    3.46
  -4 -10   1   83.52    2.47
  -4 -10   1   87.33    2.50
   4  10   1   88.16    3.44
  -5 -10  -1   19.61    1.06
   5  10  -1   22.87    1.66
  -5 -10  -1   19.95    0.98
  -5  10   1   19.35    1.56
   5 -10  -1   18.99    0.68
   5  10   1   16.41    1.44
  -5 -10   1   19.92    0.74
  -5  10  -1   18.64    1.51
  -5 -10   1   20.19    0.73
  -6  10   1    3.62    0.85
   6  10  -1    4.22    0.95
  -6 -10  -1    3.91    0.50
  -6 -10  -1    4.62    0.69
   6 -10  -1    5.14    0.50
   6  10   1    3.76    0.88
   6 -10  -1    4.26    0.45
  -6  10  -1    5.37    1.05
   7  10  -1   18.20    1.78
  -7  10   1   19.65    1.74
   7 -10  -1   17.64    0.94
   7  10   1   15.09    1.68
  -7  10  -1   17.33    1.73
   8  10  -1    2.82    1.17
  -8  10   1    5.22    1.27
   8  10   1    5.61    1.41
  -8  10  -1    2.11    0.98
   9  10  -1   -1.26    0.88
  -9  10   1   -0.13    0.94
  -9  10  -1   -0.97    0.75
   9  10   1    1.42    0.91
   0 -11  -1    1.91    0.40
   0  11   1    2.60    0.55
   0  11   1    1.80    0.40
   0  11  -1    2.42    0.44
   0  11  -1    1.46    0.46
  -1 -11  -1   13.76    0.92
   1  11  -1   14.48    0.95
  -1  11   1   13.94    1.11
   1  11  -1   14.60    1.00
  -1 -11  -1   14.91    1.01
   1  11   1   14.45    0.98
  -1  11  -1   14.23    0.70
  -1  11  -1   13.52    1.07
  -1 -11   1   13.79    0.89
   1 -11  -1   14.17    0.73
  -2 -11  -1    3.63    0.54
  -2  11   1    3.52    0.63
   2  11  -1    3.14    0.61
  -2  11   1    3.68    0.34
  -2 -11  -1    2.78    0.50
  -2  11  -1    2.55    0.62
   2 -11  -1    2.77    0.28
   2  11   1    2.60    0.56
  -2 -11   1    2.53    0.50
  -2 -11   1    2.90    0.44
   3  11  -1   92.39    3.44
  -3 -11  -1   94.45    3.05
  -3  11   1   99.49    3.70
  -3 -11  -1   95.03    3.04
  -3  11  -1   99.86    3.70
  -3 -11   1   96.25    2.93
   3  11   1   98.55    3.56
  -3 -11   1   93.58    2.88
   4  11  -1    5.83    0.93
  -4  11   1    4.88    0.87
  -4 -11  -1    4.54    0.53
  -4  11  -1    3.02    0.82
  -4 -11   1    4.71    0.49
   4  11   1    5.00    0.89
  -4 -11   1    3.60    0.50
  -5  11   1    2.40    0.73
   5  11  -1    1.77    0.67
  -5 -11  -1    2.48    0.48
  -5 -11   1    2.66    0.33
  -5 -11   1    2.84    0.32
   5  11   1    2.31    0.71
  -5  11  -1    3.88    0.87
  -6 -11  -1    1.47    0.56
  -6  11   1    1.14    0.81
  -6 -11  -1    1.11    0.43
   6  11  -1    0.55    0.56
  -6  11  -1    1.16    0.61
   6  11   1    0.78    0.57
   7  11  -1    0.72    0.70
  -7  11   1    0.94    1.34
  -7 -11  -1    1.11    0.33
  -7  11  -1    2.69    1.33
   7  11   1    2.77    1.03
  -8  11   1    2.16    1.15
   8  11  -1    3.31    1.02
   8  11   1    1.40    0.86
  -8  11  -1    2.27    1.04
  -9  11   1    0.57    1.02
   9  11  -1    0.03    0.86
   9  11   1    0.85    0.97
  -9  11  -1    2.05    1.18
   0  12  -1   41.85    1.62
   0  12   1   38.75    1.65
   0  12  -1   42.49    1.96
   0 -12  -1   35.82    1.55
   0  12   1   44.53    2.04
  -1  12   1    1.93    0.60
   1  12  -1    2.97    0.60
  -1  12   1    2.87    0.42
   1  12  -1    2.65    0.53
  -1 -12  -1    3.35    0.61
   1  12   1    2.38    0.51
  -1  12  -1    2.06    0.37
  -1  12  -1    2.01    0.54
   1 -12  -1    2.30    0.41
   2  12  -1   29.96    1.60
  -2 -12  -1   26.93    1.38
  -2  12   1   28.40    1.03
  -2  12   1   26.83    1.69
  -2 -12   1   23.08    1.19
   2  12   1   25.38    1.45
  -2 -12   1   24.02    1.24
   2 -12  -1   24.65    0.87
  -2  12  -1   25.96    1.91
   3  12  -1   37.07    2.44
  -3 -12  -1   37.19    1.61
  -3 -12  -1   32.59    1.54
  -3  12   1   31.99    1.98
  -3 -12   1   33.73    1.56
  -3 -12   1   36.74    1.47
   3  12   1   34.65    1.90
  -3  12  -1   34.95    2.05
  -4  12   1  110.12    4.30
  -4 -12  -1  108.29    3.43
  -4 -12  -1  115.18    3.46
   4  12  -1  112.81    4.18
  -4 -12   1  114.03    3.23
  -4  12  -1  115.31    4.36
  -4 -12   1  108.23    3.18
   4  12   1  108.21    4.15
  -5  12   1   10.50    1.29
   5  12  -1   10.43    1.30
  -5 -12  -1   11.22    0.76
  -5  12  -1   11.32    1.35
   5  12   1    8.85    1.16
  -5 -12   1   10.28    0.53
  -5 -12   1    9.82    0.51
  -6 -12  -1    0.11    0.82
  -6  12   1    1.48    0.74
   6  12  -1    0.87    0.63
  -6  12  -1    0.93    0.81
   6  12   1   -0.26    0.52
  -7  12   1    0.84    0.87
   7  12  -1    0.15    0.61
  -7  12  -1    0.48    0.81
   7  12   1    1.54    0.96
  -8  12   1    8.00    1.62
   8  12  -1    8.62    1.62
   8  12   1    6.87    1.41
  -8  12  -1    9.88    1.65
  -9  12   1   -0.31    1.03
   9  12  -1    3.77    1.35
  -9  12  -1   -0.19    1.01
   9  12   1    0.10    1.08
   0 -13  -1   16.28    1.01
   0  13  -1   16.79    1.27
   0  13   1   17.44    1.04
   0  13  -1   16.57    0.99
   0  13   1   16.36    1.24
  -1  13   1   18.67    1.68
  -1 -13  -1   17.01    1.22
  -1  13   1   15.00    0.86
   1  13  -1   16.75    1.09
   1 -13  -1   16.51    0.86
  -1  13  -1   15.42    0.80
  -1 -13   1   14.02    1.06
  -1  13  -1   16.32    1.29
   1  13   1   14.11    1.04
  -2  13   1   21.73    1.60
  -2  13   1   21.87    0.86
  -2 -13  -1   21.26    1.29
   2  13  -1   20.75    1.36
  -2  13  -1   19.16    1.45
  -2 -13   1   21.19    1.21
   2  13   1   18.33    1.31
  -3  13   1  105.17    4.17
  -3 -13  -1  111.43    3.56
   3  13  -1  108.99    3.97
   3  13   1  104.53    3.89
  -3 -13   1  108.62    3.35
  -3 -13   1   99.74    3.21
  -3  13  -1  110.84    4.15
  -4  13   1   26.14    1.88
  -4 -13  -1   24.26    1.27
   4  13  -1   23.19    1.71
  -4 -13   1   20.70    1.06
  -4  13  -1   24.72    1.81
  -4 -13   1   21.69    1.04
   4  13   1   22.65    1.65
  -5  13   1   19.32    1.76
  -5 -13  -1   22.25    1.09
  -5 -13  -1   19.53    1.16
   5  13  -1   21.97    1.78
  -5  13  -1   24.29    1.86
   5  13   1   21.88    1.72
  -5 -13   1   19.87    0.81
  -5 -13   1   19.19    0.81
  -6  13   1    1.09    1.56
  -6 -13  -1    0.49    0.43
   6  13  -1    0.99    0.71
   6  13   1    1.45    0.74
  -7  13   1    4.48    1.16
   7  13  -1    7.09    1.49
   7  13   1    6.95    1.44
  -7  13  -1    4.24    1.06
  -8  13   1    1.30    1.13
   8  13  -1    1.21    1.02
  -8  13  -1   -0.68    0.87
   8  13   1    1.82    0.90
   0  14  -1   14.52    0.94
   0  14  -1   12.61    1.17
   0  14   1   15.85    2.19
   0  14   1   12.86    0.95
   0 -14  -1   13.29    0.93
  -1  14   1    3.97    0.84
  -1 -14  -1    2.90    0.72
   1  14  -1    1.68    0.54
  -1  14   1    2.97    0.54
   1  14   1    2.47    0.64
  -1 -14   1    2.46    0.64
  -1  14  -1    1.70    0.54
   1 -14  -1    2.45    0.50
  -2 -14  -1   68.72    2.66
  -2  14   1   66.83    3.06
  -2  14   1   65.48    1.95
   2  14  -1   66.95    2.73
   2  14   1   70.86    2.96
  -2 -14   1   67.13    2.59
  -2  14  -1   70.20    3.11
  -3  14   1    8.28    1.15
   3  14  -1    5.88    0.89
  -3 -14  -1    7.05    0.85
  -3 -14   1    9.48    0.83
  -3  14  -1    6.50    1.03
   3  14   1    6.48    1.01
  -4 -14  -1   24.14    1.31
   4  14  -1   23.48    1.76
  -4  14   1   24.45    1.88
   4  14   1   21.65    1.74
  -4 -14   1   26.30    1.19
  -4  14  -1   21.31    1.80
  -5 -14  -1    5.54    1.09
  -5  14   1    7.55    1.26
   5  14  -1    5.52    1.06
  -5 -14   1    6.26    0.49
   5  14   1    7.11    1.15
  -5  14  -1    6.83    1.21
  -5 -14   1    5.36    0.54
   6  14  -1    1.38    0.83
  -6  14   1    0.03    0.69
  -6 -14  -1    0.72    0.71
   6  14   1    1.43    0.76
  -6  14  -1    0.26    0.75
  -7  14   1    4.47    1.28
   7  14  -1    4.29    1.21
   7  14   1    2.34    1.03
  -7  14  -1    2.20    1.06
  -8  14   1    2.81    1.23
   8  14  -1   -0.21    0.93
  -8  14  -1    5.51    1.48
   8  14   1    2.99    1.21
   0 -15  -1   11.95    1.16
   0  15  -1    9.53    0.83
   0  15   1   10.19    0.91
   0  15  -1    7.73    1.00
  -1 -15  -1    2.99    1.17
  -1  15   1    2.62    0.56
   1  15  -1    1.83    0.56
  -1  15   1    3.01    0.78
  -1 -15   1    3.02    0.74
  -1  15  -1    3.03    0.79
   1  15   1    2.81    0.70
  -1  15  -1    2.06    0.41
  -2  15   1   12.99    1.40
  -2  15   1   13.56    0.65
  -2 -15  -1   14.05    1.14
   2  15  -1   11.97    1.21
  -2  15  -1   13.57    1.40
   2  15   1   14.69    1.24
  -2 -15   1   14.82    1.17
  -3  15   1   18.21    1.69
   3  15  -1   17.47    1.43
  -3 -15  -1   19.15    1.29
   3  15   1   16.61    1.45
  -3  15  -1   15.04    1.52
  -3 -15   1   15.39    1.10
   4  15  -1    3.02    0.90
  -4  15   1    1.68    0.79
  -4 -15  -1    1.86    0.52
  -4 -15   1    1.04    0.42
   4  15   1    0.30    0.58
  -4  15  -1    1.81    0.73
  -4 -15   1    2.19    1.14
   5  15  -1   11.68    1.50
  -5 -15  -1   14.54    0.94
  -5  15   1   13.12    1.63
  -5 -15   1   13.43    0.71
   5  15   1   11.81    1.48
  -5  15  -1   14.04    1.68
  -6  15   1    7.16    1.48
   6  15  -1    5.48    1.23
   6  15   1    5.49    1.22
  -6  15  -1    4.47    1.10
  -7  15   1    0.97    0.95
   7  15  -1   -0.44    0.74
  -7  15  -1    0.87    0.96
   7  15   1   -0.04    0.87
  -8  15   1    1.97    2.47
   8  15  -1    6.16    1.88
  -8  15  -1    3.93    1.70
   8  15   1    0.26    1.09
   0  16  -1    1.00    0.44
   0 -16  -1    0.60    0.50
   0  16   1    0.66    0.48
   0  16  -1    0.59    0.46
  -1  16   1   35.05    1.49
  -1 -16  -1   34.74    1.94
   1  16  -1   32.83    1.74
  -1  16   1   34.28    2.21
  -1  16  -1   35.34    1.41
  -1 -16   1   35.29    1.95
   1  16   1   35.53    1.86
  -1  16  -1   36.58    2.18
  -2  16   1    8.21    0.47
   2  16  -1    6.65    1.03
  -2  16   1    9.10    1.27
  -2 -16  -1    8.53    1.75
  -2 -16   1    8.16    0.99
   2  16   1    7.69    1.06
  -2  16  -1    7.31    1.17
   3  16  -1    1.71    0.71
  -3 -16  -1    3.63    0.79
  -3  16   1    4.37    1.08
  -3 -16   1    3.43    0.71
  -3  16  -1    3.78    0.99
   3  16   1    3.12    0.81
  -4 -16  -1    0.28    0.54
   4  16  -1    0.11    0.60
  -4  16   1    0.25    0.65
  -4  16  -1   -0.71    0.53
   4  16   1    0.11    0.61
  -4 -16   1    0.23    0.42
  -5 -16  -1    9.30    0.90
  -5  16   1    7.06    1.43
  -5  16  -1    6.60    1.44
   5  16   1    9.79    1.81
  -5 -16   1    7.73    0.78
  -6  16   1    3.68    1.22
   6  16  -1    2.92    0.99
   6  16   1    3.23    1.11
  -6  16  -1    3.41    1.01
  -7  16   1    1.90    1.22
   7  16  -1    2.57    1.14
   7  16   1    1.13    1.16
  -7  16  -1    2.71    1.37
   0  17   1   22.44    1.38
   0  17  -1   24.76    1.83
   0 -17  -1   19.54    1.64
   0  17  -1   22.43    1.30
  -1  17   1   18.92    1.09
  -1 -17  -1   17.71    1.51
  -1  17   1   17.63    1.66
   1  17  -1   18.34    1.32
   1  17   1   16.60    2.10
  -1  17  -1   17.71    0.96
  -1 -17   1   21.37    1.54
  -1  17  -1   18.30    1.61
  -2 -17  -1   24.36    1.70
   2  17  -1   20.94    1.55
  -2  17   1   23.42    1.97
  -2 -17   1   23.97    1.90
   2  17   1   20.69    1.60
  -2  17  -1   25.73    1.98
   3  17  -1    5.32    1.11
  -3  17   1   10.98    1.47
   3  17   1    8.25    1.23
  -3  17  -1    6.81    1.32
  -3 -17   1    7.60    1.01
  -4  17   1    1.66    0.88
  -4 -17  -1    1.90    0.64
   4  17  -1    1.02    0.74
  -4  17  -1    2.40    1.06
   4  17   1    1.79    0.99
  -4 -17   1    0.98    0.57
  -5  17   1    1.58    1.03
   5  17  -1    1.15    0.87
  -5 -17  -1    1.31    0.77
  -5  17  -1    1.96    1.06
   5  17   1    1.17    0.87
   6  17  -1   19.61    2.05
  -6  17   1   17.34    2.12
   6  17   1   18.79    2.03
  -6  17  -1   17.13    2.16
   7  17  -1    2.42    1.12
  -7  17   1    4.97    2.03
  -7  17  -1    0.34    1.34
   7  17   1    4.79    1.48
   0  18  -1   21.90    1.31
   0 -18  -1   20.22    1.74
   0  18   1   18.52    1.29
   0 -18   1   21.52    1.72
  -1 -18  -1   37.83    2.22
  -1  18   1   37.49    2.41
   1  18  -1   35.19    2.81
  -1  18   1   35.64    1.59
  -1  18  -1   32.96    1.61
   1  18   1   36.46    2.02
   1 -18  -1   40.98    2.47
  -1 -18   1   39.14    2.17
  -1  18  -1   37.66    2.42
   2  18  -1    2.68    0.81
  -2  18   1    1.27    0.89
  -2 -18  -1    2.12    0.82
   2  18   1    2.18    0.85
  -2 -18   1    1.87    0.78
  -2  18  -1    2.40    1.00
   3  18  -1    0.83    0.69
  -3  18   1    0.47    0.74
  -3 -18  -1    1.57    0.80
  -3 -18   1    1.01    0.70
   3  18   1   -1.06    0.58
  -3  18  -1    1.22    0.73
  -4 -18  -1    2.71    0.80
  -4  18   1    4.05    1.17
   4  18  -1    1.47    0.79
   4  18   1    0.96    0.78
  -4 -18   1    1.55    0.68
  -4  18  -1    1.00    1.00
  -5  18   1   17.96    2.13
   5  18  -1   18.88    1.97
   5  18   1   17.84    1.92
  -5  18  -1   20.19    2.16
  -6  18   1    6.42    1.62
   6  18  -1    5.84    1.43
  -6  18  -1    4.96    1.35
   6  18   1    5.37    1.41
   0  19   1   42.10    2.03
   0 -19  -1   43.70    2.62
   0  19  -1   44.59    1.97
   0 -19   1   45.75    2.47
  -1  19   1   12.99    1.09
  -1 -19  -1   13.76    1.49
   1  19  -1   12.52    1.20
   1 -19  -1   14.94    1.60
  -1 -19   1   14.00    1.51
   1  19   1   13.25    1.32
  -1  19  -1   13.42    1.65
  -1  19  -1   13.40    1.36
  -2  19   1   13.52    1.70
  -2 -19  -1   12.55    1.42
   2  19  -1    9.37    1.29
  -2  19  -1   10.77    1.69
  -2 -19   1    9.03    1.30
   2  19   1   12.00    1.40
  -3  19   1   -0.32    0.74
  -3 -19  -1    1.26    0.73
   3  19  -1    0.14    0.75
   3  19   1   -0.37    0.65
  -3  19  -1    1.44    0.84
  -3 -19   1   -0.37    0.69
  -4  19   1   13.97    2.00
  -4 -19  -1    9.57    1.30
   4  19  -1    9.93    1.48
   4  19   1   11.03    1.56
  -4  19  -1    9.69    1.64
  -4 -19   1    9.11    1.31
   5  19  -1    2.41    1.02
  -5  19   1    1.29    1.20
   5  19   1    0.17    0.99
  -5  19  -1    1.67    1.12
   6  19  -1   11.40    1.95
  -6  19   1    7.37    1.69
  -6  19  -1   10.24    2.14
   0  20   1    2.16    0.81
   0 -20  -1    2.36    1.03
   0 -20   1    2.80    0.95
   0  20  -1    2.56    0.78
  -1 -20  -1   18.65    1.77
   1  20  -1   16.15    1.41
  -1  20  -1   19.47    2.28
   1 -20  -1   17.93    1.91
  -1 -20   1   17.60    1.71
   1  20   1   18.71    1.57
  -2  20   1    1.06    0.98
  -2 -20  -1    0.03    0.84
   2  20  -1    0.91    0.76
  -2  20  -1    1.24    1.01
   2 -20  -1   -0.93    0.85
   2  20   1    0.59    0.83
  -2 -20   1    0.19    0.83
  -3  20   1    1.62    0.98
   3  20  -1   -0.52    0.80
  -3 -20  -1    0.36    0.85
  -3  20  -1    0.94    1.01
  -3 -20   1    0.40    0.98
   3  20   1    0.80    0.97
   4  20  -1    3.70    1.09
  -4 -20  -1    2.27    1.17
  -4  20   1    4.11    1.33
   4  20   1    4.84    1.15
  -4  20  -1    3.66    1.28
   5  20  -1    4.14    1.29
  -5  20  -1    3.97    2.16
   5  20   1    8.98    1.82
   0 -21  -1    9.05    1.59
   0 -21   1   12.09    2.54
   0  21   1   11.56    1.49
   1  21  -1    1.86    0.97
  -1 -21  -1    0.39    0.93
   1 -21   1    1.46    0.94
   1  21   1   -0.17    0.87
   1 -21  -1   -0.51    0.89
  -1 -21   1    3.07    0.91
  -2 -21  -1    0.70    1.02
   2  21  -1    3.17    0.97
  -2 -21   1    1.51    1.02
   2  21   1    0.41    1.02
  -2  21  -1    2.44    1.09
   2 -21  -1   -0.79    0.87
   3  21  -1    6.56    1.54
  -3  21   1    8.42    1.90
  -3 -21  -1    7.55    1.63
  -3  21  -1    4.06    1.30
  -3 -21   1    7.44    1.60
   3  21   1    5.83    1.35
   4  21  -1    1.67    1.05
  -4  21   1    2.07    1.14
   4  21   1    0.99    1.05
  -4  21  -1    2.02    1.32
   0 -22   1    0.99    1.23
   0 -22  -1   -0.27    1.05
   1 -22   1    2.70    1.19
  -1 -22  -1    1.40    1.07
   1  22  -1    3.88    1.81
   1 -22  -1    3.13    1.13
   1  22   1    2.07    1.21
  -1 -22   1    0.23    1.17
   2 -22   1    3.08    1.12
   2  22  -1   -0.01    1.17
  -2 -22  -1    0.95    1.37
   2  22   1    3.16    1.27
   2 -22  -1    2.85    1.25
  -2 -22   1    0.63    1.28
  -3 -22  -1    0.91    1.85
   3  22  -1    0.10    1.15
   3  22   1    0.67    1.26
  -3  22  -1    1.96    1.37
   3 -22  -1    3.14    1.33
   0 -23  -1    1.85    1.22
   0 -23   1   -0.98    1.27
  -1 -23  -1    1.39    1.16
   1 -23   1    4.56    1.43
  -1 -23   1    1.76    1.37
   1 -23  -1    5.54    1.52
   1   0  -2   30.39    0.88
   1   0   2   29.45    0.94
   1   0   2   30.37    0.95
  -1   0  -2   29.77    0.94
  -1   0  -2   29.42    0.95
  -1   0   2   30.61    0.89
  -2   0  -2    7.66    0.47
   2   0   2    7.59    0.48
  -2   0  -2    8.43    0.48
   2   0  -2    8.37    0.41
   2   0   2    8.14    0.47
  -2   0   2    8.85    0.43
   3   0  -2   82.60    2.43
  -3   0   2   83.88    2.45
  -3   0  -2   89.06    2.60
  -3   0  -2   85.57    2.58
   3   0  -2   86.75    2.63
   3   0   2   83.19    2.54
   3   0   2   88.30    2.63
  -4   0  -2   10.47    0.73
   4   0   2   12.45    0.85
  -4   0  -2   12.86    0.80
  -4   0   2   13.39    0.74
   4   0   2   12.54    0.88
   4   0  -2   11.66    0.68
   4   0  -2   12.54    0.88
  -5   0   2    2.04    0.42
   5   0   2    2.91    0.61
   5   0  -2    2.60    0.54
   5   0  -2    2.72    0.43
  -5   0  -2    2.69    0.47
   5   0   2    2.05    0.43
   6   0  -2   21.03    1.37
   6   0   2   22.37    1.38
  -6   0  -2   21.05    1.27
  -6   0   2   19.22    1.14
  -7   0  -2   64.79    2.64
  -7   0   2   64.63    2.49
   7   0  -2   63.44    2.82
   7   0   2   61.69    2.75
   8   0  -2   18.19    1.55
  -8   0   2   19.35    1.33
   8   0   2   20.70    1.59
  -8   0  -2   19.78    1.43
  -9   0   2   -0.12    0.54
   9   0  -2    0.11    0.66
   9   0   2   -0.35    0.59
  -9   0  -2    0.83    0.74
 -10   0   2    0.43    0.95
  10   0   2    0.22    0.85
  10   0  -2    0.24    0.74
 -10   0  -2    0.56    0.87
   0   1  -2  447.29   10.63
   0  -1   2  449.33   10.68
   0   1  -2  439.86   10.68
   0   1   2  437.38   10.78
   0  -1  -2  440.94   10.70
   0  -1   2  440.80   10.63
   0   1   2  438.85   10.71
   1  -1   2  402.13    9.79
   1   1  -2  400.71    9.68
  -1   1   2  408.64    9.92
  -1   1   2  403.93    9.88
  -1  -1  -2  399.85    9.87
   1   1  -2  412.99    9.68
  -1   1  -2  407.29    9.86
   1  -1  -2  407.26    9.87
   1   1   2  389.68    9.81
   1   1   2  399.73    9.86
   1  -1  -2  402.36    9.82
  -1   1  -2  409.23    9.75
  -2  -1  -2    4.76    0.38
  -2   1   2    5.38    0.37
   2  -1   2    5.05    0.36
  -2  -1  -2    4.96    0.36
   2  -1   2    4.46    0.36
  -2   1  -2    4.89    0.39
  -2   1  -2    4.56    0.33
   2  -1  -2    5.58    0.36
   2   1   2    4.97    0.34
   2   1   2    5.55    0.42
  -2  -1   2    5.21    0.28
  -3  -1  -2  103.70    2.87
  -3  -1  -2   97.43    2.93
   3  -1   2   92.08    2.87
   3   1  -2   99.10    3.00
   3  -1   2   99.45    2.90
   3   1  -2   96.01    2.65
   3   1   2   92.18    2.67
  -3  -1   2   95.13    2.54
   3  -1  -2   86.28    2.63
   3   1   2   93.67    2.83
  -3   1  -2   90.38    2.68
  -3   1  -2   92.11    2.78
  -4   1   2   33.37    1.38
   4  -1   2   36.08    1.45
   4  -1   2   33.55    1.43
  -4  -1  -2   33.67    1.46
   4   1  -2   34.88    1.55
   4   1  -2   32.56    1.22
  -4  -1  -2   35.33    1.40
   4  -1  -2   33.95    1.44
   4  -1  -2   29.85    1.27
  -4   1  -2   31.90    1.50
  -4   1  -2   32.65    1.41
   4   1   2   32.12    1.30
   4   1   2   34.12    1.50
  -4  -1   2   31.31    1.35
   5  -1   2   19.23    1.12
  -5  -1  -2   17.77    1.03
   5   1  -2   17.92    1.15
  -5   1   2   17.78    1.02
   5   1  -2   16.44    0.88
  -5  -1   2   18.06    0.93
  -5   1  -2   19.94    1.14
   5   1   2   18.44    1.18
   5  -1  -2   17.31    0.99
   5   1   2   17.48    0.99
   5  -1  -2   19.14    1.15
  -6   1   2   25.04    1.35
   6  -1   2   22.81    1.40
  -6  -1  -2   23.30    1.30
   6   1  -2   23.81    1.20
   6   1  -2   27.36    1.62
  -6   1  -2   24.99    1.44
   6  -1  -2   27.06    1.52
  -6  -1   2   23.53    1.22
   6   1   2   23.69    1.48
  -7   1   2   71.57    2.79
   7  -1   2   77.83    3.03
  -7  -1  -2   73.43    2.83
   7   1  -2   70.95    3.09
   7   1   2   67.29    2.97
  -7   1  -2   71.43    2.94
  -7  -1   2   70.68    2.57
   7  -1  -2   71.17    2.95
   8   1  -2   20.81    1.74
   8  -1   2   21.16    1.60
  -8  -1  -2   21.96    1.50
  -8   1   2   21.33    1.48
   8  -1  -2   22.69    1.70
  -8   1  -2   20.50    1.51
  -8  -1   2   23.18    1.41
   8   1   2   21.78    1.68
  -9  -1  -2    1.78    0.75
  -9   1   2    2.89    0.74
   9   1  -2    2.91    0.98
   9  -1   2    1.00    0.70
  -9  -1   2    2.18    0.73
   9  -1  -2    2.89    0.77
   9   1   2    1.71    0.88
  -9   1  -2    2.32    0.86
 -10  -1  -2    1.78    0.87
  10  -1   2    1.50    0.92
  10   1  -2    2.62    1.17
 -10   1   2    2.02    1.01
  10   1   2    1.98    0.94
 -10  -1   2    1.38    0.98
 -10   1  -2    2.16    1.01
  10  -1  -2    0.93    0.90
   0   2  -2  893.58   21.42
   0   2   2  878.45   21.49
   0  -2  -2  895.90   21.50
   0   2  -2  909.14   21.41
   1  -2   2  164.06    4.10
  -1  -2  -2  168.04    4.34
   1  -2   2  165.44    4.31
  -1   2   2  167.06    4.34
  -1  -2  -2  168.52    4.27
  -1   2   2  170.18    4.28
  -1   2  -2  174.94    4.46
   1  -2  -2  173.04    4.38
   1   2   2  172.40    4.39
   1  -2  -2  174.49    4.46
  -1   2  -2  166.12    4.22
   1   2   2  174.41    4.47
   2  -2   2   38.63    1.39
  -2  -2  -2   39.07    1.41
   2   2  -2   40.90    1.07
  -2  -2  -2   41.37    1.31
  -2   2   2   38.64    1.38
   2  -2   2   42.68    1.25
   2   2  -2   41.53    1.45
   2  -2  -2   36.98    1.33
   2   2   2   41.55    1.62
  -2  -2   2   40.78    1.07
   2   2   2   40.89    1.29
   2  -2  -2   38.67    1.34
  -2   2  -2   39.98    1.21
   3  -2   2  100.94    3.13
   3   2  -2  105.11    2.79
  -3  -2  -2  104.02    3.19
   3  -2   2  108.85    3.02
   3   2  -2  110.22    3.28
  -3   2   2  111.56    3.16
  -3   2  -2  106.05    2.97
  -3  -2   2  106.52    2.81
   3   2   2  102.94    3.00
  -3   2  -2  109.41    3.20
   3   2   2  108.62    3.25
   3  -2  -2  106.59    3.09
   4  -2   2    6.67    0.61
   4   2  -2    7.60    0.45
  -4  -2  -2    6.25    0.52
   4   2  -2    7.73    0.74
  -4   2   2    6.92    0.60
  -4  -2  -2    5.36    0.59
   4  -2   2    8.18    0.62
   4   2   2    6.18    0.51
   4  -2  -2    6.29    0.58
   4   2   2    6.53    0.66
  -4  -2   2    7.23    0.47
  -4   2  -2    7.84    0.69
   4  -2  -2    5.67    0.56
  -5   2   2    9.11    0.79
   5   2  -2    8.09    0.58
   5  -2   2    9.24    0.76
  -5  -2  -2    8.83    0.69
   5   2  -2   10.63    0.93
   5  -2  -2    9.34    0.80
   5   2   2   10.22    0.91
  -5   2  -2    8.87    0.79
   5   2   2    9.18    0.71
  -5  -2   2    9.80    0.64
   6  -2   2   50.61    2.13
   6   2  -2   52.32    2.39
  -6  -2  -2   50.59    2.02
   6   2  -2   48.40    1.84
  -6   2   2   50.70    2.12
  -6   2  -2   49.77    2.19
  -6  -2   2   46.62    1.80
   6  -2  -2   49.48    2.15
   7  -2   2    7.14    1.51
  -7  -2  -2    7.49    0.83
   7   2  -2    8.17    1.07
  -7   2   2    6.61    0.92
   7   2   2    9.04    1.08
  -7   2  -2    7.11    0.96
  -7  -2   2    9.36    0.81
   7  -2  -2    9.57    1.05
  -8  -2  -2   10.53    1.06
   8   2  -2    8.28    1.26
  -8   2   2    7.99    1.02
   8  -2   2    9.45    1.16
   8   2   2    7.54    1.19
  -8  -2   2    7.35    0.86
   8  -2  -2    8.89    1.13
  -8   2  -2    9.24    1.17
   9   2  -2    2.50    0.97
  -9   2   2    3.92    0.88
  -9  -2  -2    3.22    0.82
   9  -2   2    3.89    0.94
  -9   2  -2    3.75    1.03
   9   2   2    4.50    1.21
   9  -2  -2    4.50    0.97
  -9  -2   2    2.81    0.76
 -10  -2  -2    2.95    0.92
 -10   2   2    1.80    0.94
  10   2  -2    3.04    1.03
  10  -2   2    1.14    0.86
  10   2   2    2.75    0.96
  10  -2  -2    1.89    0.99
 -10   2  -2    1.25    0.94
   0  -3   2  632.91   15.27
   0   3   2  631.29   15.34
   0   3  -2  627.14   15.28
   0  -3  -2  633.75   15.41
   0  -3  -2  638.83   15.32
   1  -3   2   84.60    2.41
  -1   3   2   85.10    2.46
   1  -3   2   85.06    2.10
  -1   3   2   86.23    2.32
  -1  -3  -2   82.55    2.41
   1   3  -2   84.69    2.13
  -1  -3  -2   85.12    2.35
  -1   3  -2   87.70    2.50
   1  -3  -2   87.88    2.37
   1  -3  -2   87.85    2.52
  -1  -3   2   88.37    2.19
   1   3   2   87.64    2.51
   1   3   2   88.12    2.42
  -2   3   2   82.09    2.48
  -2  -3  -2   82.04    2.32
   2  -3   2   79.97    2.15
  -2  -3  -2   83.13    2.49
   2  -3   2   77.84    2.44
   2   3  -2   83.28    2.51
   2   3   2   83.58    2.50
   2   3   2   77.77    2.27
  -2   3  -2   80.59    2.46
   2  -3  -2   81.10    2.31
   2  -3  -2   79.28    2.41
  -2   3  -2   78.30    2.12
   3   3  -2   35.07    1.50
   3  -3   2   34.05    1.58
  -3  -3  -2   33.47    1.43
   3   3  -2   35.32    1.14
  -3   3   2   35.92    1.43
   3  -3   2   34.87    1.20
  -3  -3  -2   35.31    1.28
  -3  -3   2   35.59    1.07
   3   3   2   38.31    1.57
   3  -3  -2   37.71    1.45
  -3   3  -2   40.23    1.55
   3   3   2   35.18    1.29
   4   3  -2   37.08    1.72
   4  -3   2   37.52    1.75
  -4  -3  -2   37.12    1.42
  -4   3   2   39.25    1.62
   4  -3   2   38.61    1.44
   4   3  -2   36.06    1.20
  -4  -3   2   38.10    1.25
   4  -3  -2   41.68    1.55
   4  -3  -2   39.51    1.60
  -4   3  -2   38.22    1.68
   4   3   2   39.89    1.76
   4   3   2   39.28    1.45
   5  -3   2   20.17    1.12
   5   3  -2   19.15    0.88
  -5   3   2   20.14    1.18
   5   3  -2   20.59    1.33
  -5  -3  -2   19.68    1.05
  -5  -3   2   17.98    1.13
  -5   3  -2   17.00    1.14
   5  -3  -2   17.13    1.06
   5   3   2   17.36    0.97
   5   3   2   18.36    1.23
  -6  -3  -2    4.66    0.62
   6   3  -2    5.24    0.57
  -6   3   2    5.79    0.76
   6  -3   2    5.48    0.68
   6   3  -2    5.70    0.89
   6   3   2    6.22    0.86
  -6  -3   2    6.00    0.55
  -6   3  -2    6.10    0.82
   6  -3  -2    5.79    0.74
   7  -3   2   15.11    1.19
  -7  -3  -2   15.68    1.11
   7   3  -2   15.21    0.96
  -7   3   2   14.04    1.18
   7   3  -2   16.16    1.46
   7   3   2   14.58    1.35
   7  -3  -2   15.84    1.48
  -7   3  -2   14.22    1.27
  -7  -3   2   15.85    0.96
   8  -3   2   33.35    1.88
  -8   3   2   34.26    1.97
   8   3  -2   36.34    2.31
  -8  -3  -2   31.97    1.74
  -8  -3   2   32.06    1.50
   8  -3  -2   34.71    1.96
   8   3   2   28.81    2.08
  -8   3  -2   29.87    1.94
  -9   3   2    6.60    1.13
   9   3  -2    6.81    1.31
   9  -3   2    5.65    1.10
  -9  -3  -2    4.59    1.00
   9  -3  -2    7.65    1.22
  -9  -3   2    8.42    1.03
  -9   3  -2    5.15    1.00
   9   3   2    7.98    1.31
  10   3  -2    6.70    1.49
 -10   3   2    8.00    1.59
  10  -3   2    9.05    1.74
 -10  -3  -2    8.90    1.39
  10  -3  -2    8.49    1.44
  10   3   2   12.78    1.75
 -10   3  -2    9.02    1.54
   0  -4   2   46.33    1.42
   0  -4  -2   47.22    1.45
   0   4  -2   45.69    1.43
   0   4  -2   47.81    1.36
   0   4   2   46.89    1.56
   0  -4  -2   45.73    1.52
   0   4   2   47.07    1.46
   1   4  -2   77.68    2.05
  -1  -4  -2   76.25    2.23
  -1   4   2   78.22    2.17
   1  -4   2   79.40    2.30
   1   4  -2   74.83    2.26
  -1  -4  -2   78.45    2.30
  -1   4  -2   85.72    2.46
   1   4   2   82.25    2.35
   1  -4  -2   77.74    2.44
   1  -4  -2   83.65    2.26
   1   4   2   84.40    2.46
  -2  -4  -2  330.50    8.22
   2  -4   2  332.18    7.91
   2   4  -2  340.69    8.47
   2  -4   2  322.33    8.41
  -2  -4  -2  313.58    8.40
  -2   4   2  324.86    8.47
  -2  -4   2  329.72    7.70
   2  -4  -2  318.23    8.01
   2  -4  -2  317.06    8.26
   2   4   2  319.56    8.05
  -2   4  -2  319.21    8.30
   2   4   2  323.05    8.33
   3   4  -2  156.67    3.93
  -3  -4  -2  154.03    4.56
   3  -4   2  162.87    4.13
   3   4  -2  166.63    4.67
   3  -4   2  151.07    4.51
  -3  -4  -2  161.45    4.31
  -3   4   2  159.59    4.58
   3  -4  -2  151.85    4.46
   3   4   2  158.28    4.60
  -3   4  -2  160.04    4.58
   3   4   2  157.46    4.24
   3  -4  -2  157.95    4.30
  -3  -4   2  160.14    3.89
   4   4  -2  106.97    3.49
  -4  -4  -2  102.95    3.05
   4   4  -2  100.98    2.74
  -4   4   2  102.60    3.34
   4  -4   2  103.52    3.02
   4  -4  -2   98.59    2.95
  -4   4  -2  103.42    3.33
  -4  -4   2   97.96    2.62
   4   4   2   98.76    3.34
   4  -4  -2   95.52    3.45
   4   4   2   94.91    2.90
   4  -4  -2  100.28    3.07
  -5  -4  -2   25.75    1.20
   5   4  -2   24.24    1.49
  -5   4   2   26.13    1.44
   5  -4   2   27.16    1.23
   5   4  -2   24.85    0.97
  -5  -4   2   25.44    0.97
   5   4   2   26.75    1.54
   5   4   2   23.65    1.16
   5  -4  -2   25.76    1.28
  -5   4  -2   27.11    1.51
  -6   4   2   17.01    1.22
   6  -4   2   17.91    1.11
   6   4  -2   18.35    1.42
  -6  -4  -2   16.34    1.03
   6   4  -2   15.16    0.84
  -6   4  -2   14.49    1.22
   6  -4  -2   15.73    1.10
   6   4   2   14.85    1.28
  -6  -4   2   16.34    0.83
   6   4   2   14.91    1.00
   7   4  -2    2.93    0.76
   7   4  -2    2.92    0.80
   7  -4   2    1.80    0.52
  -7   4   2    1.72    0.56
  -7  -4  -2    3.18    0.59
   7   4   2    2.04    0.70
  -7  -4   2    2.79    0.48
  -7   4  -2    2.75    0.73
   7  -4  -2    3.69    0.80
   8  -4   2   17.50    1.37
  -8   4   2   16.41    1.44
   8   4  -2   18.64    1.73
  -8  -4  -2   18.51    1.24
   8   4   2   13.91    1.49
  -8  -4   2   15.49    0.97
   8  -4  -2   18.41    1.38
  -8   4  -2   19.35    1.58
  -9  -4  -2   20.20    1.45
   9   4  -2   27.09    2.13
  -9   4   2   27.00    1.94
   9  -4   2   22.16    1.76
   9   4   2   23.50    2.02
   9  -4  -2   28.79    1.85
  -9   4  -2   23.09    1.88
  -9  -4   2   25.13    1.43
 -10  -4  -2    2.38    1.10
 -10   4   2    3.49    1.14
  10   4  -2    2.83    1.06
  10  -4   2    2.56    0.92
 -10   4  -2    1.34    0.99
  10  -4  -2    3.38    1.94
  10   4   2    2.52    0.95
   0  -5  -2   26.91    0.96
   0   5  -2   25.34    0.98
   0   5  -2   25.24    0.89
   0  -5  -2   25.87    1.06
   0  -5   2   24.91    0.94
   0   5   2   25.97    0.98
   1  -5   2   32.80    1.25
   1   5  -2   32.38    1.23
   1   5  -2   32.74    1.07
  -1  -5  -2   33.36    1.25
  -1   5   2   33.65    1.34
  -1  -5  -2   34.82    1.26
  -1  -5  -2   34.20    1.22
  -1   5   2   33.41    1.13
  -1   5  -2   32.03    1.26
  -1  -5   2   32.50    1.02
   1   5   2   33.32    1.26
   1  -5  -2   30.91    1.25
   1  -5  -2   32.93    1.07
  -1   5  -2   32.25    0.85
   2   5  -2  215.28    5.83
  -2  -5  -2  215.29    5.59
  -2  -5  -2  214.18    5.81
  -2   5   2  210.39    5.87
   2  -5   2  218.48    6.09
  -2  -5   2  210.09    5.16
   2  -5  -2  210.87    5.74
  -2  -5   2  211.14    5.15
   2  -5  -2  206.84    5.36
   2   5   2  217.92    5.78
  -2   5  -2  205.66    5.72
   2   5   2  209.59    5.47
   3   5  -2   52.05    2.02
   3  -5   2   51.89    1.95
  -3   5   2   49.93    1.98
   3  -5   2   51.29    1.47
  -3  -5  -2   51.40    1.97
   3   5   2   56.45    2.10
  -3  -5   2   54.24    1.41
   3   5   2   51.90    1.73
  -3  -5   2   53.23    1.39
   3  -5  -2   51.99    1.73
  -3   5  -2   55.43    2.07
   3  -5  -2   48.99    1.93
  -4   5   2   10.07    0.85
   4   5  -2    9.42    0.42
   4   5  -2    9.20    0.83
  -4  -5  -2    9.88    0.64
   4  -5   2    9.76    0.57
   4  -5  -2   10.50    0.71
  -4  -5   2   10.93    0.44
   4   5   2   11.39    0.68
  -4   5  -2   12.02    0.92
   4   5   2    9.24    0.87
  -5   5   2   35.62    1.77
   5   5  -2   35.22    1.87
  -5  -5  -2   34.32    1.41
   5  -5   2   33.81    1.39
   5   5  -2   32.58    1.13
  -5   5  -2   35.44    1.79
   5   5   2   30.97    1.77
  -5  -5   2   34.30    1.12
   5  -5  -2   33.71    1.46
   5  -5  -2   32.17    1.51
   6   5  -2   12.46    1.24
  -6   5   2   11.46    1.12
  -6  -5  -2   14.47    0.91
   6  -5   2   11.66    0.90
   6   5  -2   11.78    0.67
   6   5   2   13.71    0.94
  -6  -5   2   12.47    0.66
  -6   5  -2   11.23    1.09
   6   5   2   10.55    1.14
   6  -5  -2   11.11    0.91
   7  -5   2    9.33    0.86
  -7  -5  -2   10.30    0.86
   7   5  -2    7.89    0.69
   7   5  -2    7.11    1.12
  -7   5   2    8.90    1.06
   7  -5  -2   11.59    1.01
  -7  -5   2    9.84    0.66
  -7   5  -2   10.59    1.19
   7   5   2   10.04    1.20
   8   5  -2    3.68    1.03
   8  -5   2    5.01    0.89
  -8  -5  -2    5.75    0.82
  -8   5   2    3.15    0.87
  -8   5  -2    4.27    1.01
   8  -5  -2    5.54    0.96
   8   5   2    4.40    1.05
   9  -5   2   10.91    1.33
  -9   5   2   10.70    1.43
  -9  -5  -2    8.25    1.76
   9   5  -2    9.66    1.52
   9   5   2    9.32    1.53
   9  -5  -2   11.80    1.35
  -9   5  -2   11.60    1.76
 -10   5   2    7.94    1.67
  10   5  -2    6.09    1.45
  10  -5   2    7.66    1.35
 -10   5  -2   10.17    1.69
  10   5   2   10.30    1.68
  10  -5  -2    7.90    1.47
   0   6   2   83.78    2.63
   0  -6   2   80.30    2.44
   0  -6  -2   81.40    2.42
   0   6  -2   80.37    2.64
   0  -6  -2   84.96    2.59
   0   6   2   85.16    2.46
   0   6  -2   88.06    2.36
  -1   6   2   58.37    1.74
   1   6  -2   53.93    1.85
  -1   6   2   56.61    2.03
  -1  -6  -2   59.21    1.92
   1   6  -2   57.16    1.74
  -1  -6  -2   55.95    1.87
  -1  -6  -2   56.46    1.88
   1  -6   2   57.85    1.92
   1  -6  -2   59.37    2.02
  -1   6  -2   59.59    2.02
  -1  -6   2   57.54    1.73
   1  -6  -2   59.26    1.74
   1   6   2   61.29    2.00
  -1   6  -2   56.56    1.52
  -2  -6  -2  186.23    5.34
  -2   6   2  195.16    5.00
   2   6  -2  200.74    5.39
   2  -6   2  188.42    5.34
  -2   6   2  196.34    5.48
   2  -6  -2  191.77    5.42
  -2  -6   2  197.81    4.88
   2   6   2  188.80    5.15
   2   6   2  198.79    5.47
  -2  -6   2  195.69    4.89
   2  -6  -2  196.21    5.01
  -2   6  -2  198.21    5.48
   3  -6   2   61.47    1.61
   3  -6   2   61.21    1.60
  -3  -6  -2   62.07    2.00
   3   6  -2   60.92    2.32
  -3   6   2   63.28    2.37
   3   6   2   58.84    1.94
  -3  -6   2   60.86    1.61
   3  -6  -2   60.45    1.88
  -3  -6   2   61.37    1.60
  -3   6  -2   58.85    2.28
   3   6   2   61.26    2.32
  -4  -6  -2   73.22    2.25
   4   6  -2   67.34    2.68
  -4   6   2   68.42    2.66
   4  -6   2   67.36    1.99
   4   6   2   71.35    2.73
   4   6   2   69.93    2.24
  -4  -6   2   71.00    1.84
  -4   6  -2   71.07    2.71
   4  -6  -2   67.46    2.26
  -5  -6  -2   49.10    1.80
   5  -6   2   50.03    1.74
   5   6  -2   53.73    2.40
  -5   6   2   47.65    2.24
   5   6  -2   48.67    1.44
  -5   6  -2   47.65    2.28
  -5  -6   2   48.95    1.40
   5  -6  -2   49.06    1.82
   5   6   2   52.34    2.38
   5   6   2   46.96    2.01
  -6   6   2    4.25    0.90
  -6  -6  -2    4.27    0.54
   6  -6   2    3.55    0.59
   6   6  -2    4.89    1.03
   6   6  -2    4.77    0.39
   6   6   2    4.60    0.65
  -6  -6   2    4.95    0.39
  -6   6  -2    3.63    0.79
   6   6   2    4.14    0.92
   6  -6  -2    4.44    0.63
  -7   6   2    9.30    1.11
   7  -6   2    8.08    0.82
   7   6  -2    7.37    0.56
  -7  -6  -2    8.21    0.79
   7   6  -2    8.95    1.23
  -7   6  -2    9.51    1.21
   7  -6  -2    8.88    0.93
   7   6   2    9.54    1.25
  -8   6   2    8.26    1.22
  -8  -6  -2    7.30    0.92
   8  -6   2    8.89    0.98
   8   6  -2    7.59    1.28
  -8  -6   2    7.31    0.58
   8   6   2    7.97    1.30
   8  -6  -2    8.55    1.03
  -8   6  -2    8.32    1.18
   9  -6   2   30.08    1.83
  -9   6   2   28.18    2.27
   9   6  -2   29.88    2.31
  -9  -6  -2   27.30    1.61
  -9   6  -2   30.28    2.24
   9   6   2   24.73    2.17
   9  -6  -2   26.22    1.78
  10   6  -2   10.96    1.78
 -10   6   2    6.54    1.32
  10  -6  -2    7.19    1.39
 -10   6  -2    9.59    1.69
  10   6   2    4.49    1.29
   0  -7  -2   28.99    1.25
   0  -7   2   27.28    1.13
   0   7  -2   28.35    1.19
   0   7  -2   28.42    1.04
   0   7   2   27.30    1.27
   0  -7  -2   28.96    1.11
   0   7   2   28.97    1.28
  -1   7   2   48.81    1.89
   1   7  -2   49.39    1.62
   1   7  -2   49.91    1.73
  -1   7   2   47.93    1.55
  -1  -7  -2   45.08    1.70
  -1  -7  -2   48.07    1.73
  -1  -7  -2   48.03    1.72
  -1   7  -2   48.04    1.82
  -1   7  -2   47.92    1.33
   1  -7  -2   49.46    1.53
  -1  -7   2   47.11    1.55
   1   7   2   49.22    1.78
   1  -7  -2   48.62    1.83
  -2  -7  -2  173.48    5.07
  -2  -7  -2  177.35    4.88
  -2   7   2  185.01    5.28
   2  -7   2  172.83    5.08
   2   7  -2  188.49    5.16
  -2   7   2  187.70    4.71
  -2  -7  -2  176.47    4.93
  -2   7  -2  182.56    5.20
   2  -7  -2  173.10    5.11
  -2  -7   2  179.97    4.62
   2   7   2  180.37    5.15
   2  -7  -2  180.35    4.64
  -2  -7   2  181.57    4.60
   3   7  -2   54.87    2.22
  -3   7   2   56.17    2.28
  -3  -7  -2   57.68    1.91
  -3  -7   2   53.80    1.49
   3  -7  -2   54.40    1.68
   3   7   2   51.15    1.80
  -3   7  -2   54.44    2.20
   3   7   2   53.69    2.20
  -3  -7   2   53.99    1.50
   4  -7   2   41.99    1.27
  -4  -7  -2   42.01    1.55
   4   7  -2   44.15    2.05
   4  -7   2   41.35    1.22
  -4   7   2   37.46    1.93
   4   7   2   38.06    1.89
  -4  -7   2   37.74    1.04
   4  -7  -2   37.64    1.41
  -4   7  -2   37.78    1.87
   4   7   2   37.06    1.45
  -4  -7   2   36.09    1.06
  -5   7   2   10.06    1.14
   5  -7   2    8.75    0.62
  -5  -7  -2   10.99    0.73
   5  -7   2    9.15    0.63
   5   7  -2   10.54    1.12
   5  -7  -2   10.00    0.77
   5   7   2    7.61    1.00
  -5   7  -2    7.85    1.00
  -5  -7   2   10.61    0.39
  -5  -7   2   11.12    0.46
   5  -7  -2   10.87    0.76
   5   7   2    9.62    0.84
   6   7  -2    9.67    1.19
   6  -7   2    8.44    0.73
  -6  -7  -2    8.58    0.72
   6  -7   2    8.56    0.79
  -6   7   2    8.23    1.03
  -6   7  -2    8.89    1.12
   6  -7  -2    8.67    0.78
   6  -7  -2    8.16    0.86
   6   7   2    8.37    0.84
   6   7   2    6.21    1.03
  -6  -7   2    8.70    0.37
   7  -7   2    4.00    0.76
  -7   7   2    3.56    0.84
   7   7  -2    3.89    0.97
  -7  -7  -2    3.80    0.61
   7  -7   2    3.83    0.65
   7  -7  -2    3.61    0.70
   7   7   2    2.76    0.81
  -7   7  -2    2.47    0.69
   8  -7   2    4.03    0.80
   8   7  -2    4.65    1.16
  -8  -7  -2    4.27    0.74
  -8   7   2    5.69    1.04
  -8   7  -2    4.14    1.06
   8   7   2    5.97    1.26
   8  -7  -2    5.09    1.33
   9   7  -2    6.47    1.40
  -9   7   2    5.12    1.21
   9  -7   2    4.48    0.91
  -9  -7  -2    4.49    0.84
  -9   7  -2    3.46    1.03
   9   7   2    5.18    1.30
   9  -7  -2    8.20    1.25
  10   7  -2    3.87    1.27
 -10   7   2    4.89    1.48
  10   7   2    7.51    1.71
 -10   7  -2    4.01    1.30
   0   8   2    1.26    0.31
   0   8  -2    1.33    0.29
   0   8   2    1.41    0.37
   0  -8  -2    1.31    0.30
   0  -8  -2    2.12    0.38
   0  -8   2    1.32    0.29
   0   8  -2    1.16    0.30
   1   8  -2   63.35    2.08
  -1   8   2   63.64    1.99
  -1  -8  -2   63.91    2.18
  -1   8   2   64.96    2.38
  -1  -8  -2   66.42    2.22
   1  -8   2   58.52    2.16
   1   8  -2   65.41    2.16
   1  -8  -2   65.66    2.31
  -1   8  -2   62.21    1.75
   1   8   2   65.47    2.25
   1  -8  -2   64.72    1.95
  -1  -8   2   62.17    2.00
  -1   8  -2   64.82    2.30
  -2  -8  -2   10.31    0.70
  -2  -8  -2   10.66    0.71
  -2  -8  -2   10.36    0.78
  -2   8   2   10.70    0.89
   2   8  -2   12.18    0.86
  -2   8   2   10.85    0.58
   2  -8  -2    8.81    0.49
  -2  -8   2   10.87    0.60
   2   8   2    9.23    0.79
  -2  -8   2   11.19    0.56
  -2   8  -2   11.74    0.89
  -3  -8  -2   82.25    2.57
  -3   8   2   82.36    3.04
  -3  -8  -2   79.89    2.61
   3   8  -2   81.60    2.96
   3  -8  -2   83.21    2.32
   3   8   2   78.25    2.93
  -3   8  -2   80.98    2.98
  -3  -8   2   83.13    2.23
  -3  -8   2   77.89    2.20
  -4  -8  -2   28.61    1.22
   4   8  -2   26.91    1.60
  -4   8   2   25.92    1.59
  -4  -8   2   28.66    0.84
  -4   8  -2   27.77    1.63
  -4  -8   2   28.37    1.03
   4   8   2   27.49    1.22
   4  -8  -2   28.81    1.11
   4   8   2   28.14    1.67
  -5   8   2   12.98    1.20
   5  -8   2   13.13    0.62
   5  -8   2   14.02    0.62
  -5  -8  -2   14.87    0.86
   5   8  -2   16.00    1.34
   5  -8  -2   12.37    0.80
  -5   8  -2   12.01    1.20
   5   8   2   13.54    1.26
   5  -8  -2   11.40    0.75
   6  -8   2   15.49    1.03
  -6  -8  -2   16.44    0.96
  -6   8   2   15.57    1.41
   6  -8   2   15.17    0.87
   6   8  -2   15.36    1.46
   6  -8  -2   15.05    1.03
   6   8   2   17.54    1.52
  -6   8  -2   13.58    1.36
   6   8   2   14.03    0.94
   6  -8  -2   15.05    0.95
   7  -8   2    3.40    0.60
  -7   8   2    2.63    0.76
  -7  -8  -2    3.69    0.59
   7   8  -2    2.94    0.90
   7  -8  -2    2.91    0.65
   7   8   2    3.90    0.76
   7   8   2    3.26    0.94
  -7   8  -2    3.85    0.99
   8  -8   2    4.93    0.79
  -8   8   2    9.40    1.28
   8   8  -2    7.10    1.32
   8  -8  -2    4.46    0.89
  -8   8  -2    6.88    1.49
   8   8   2    6.19    1.21
  -9   8   2    5.59    1.37
   9   8  -2    4.42    1.19
   9  -8  -2    6.57    1.17
  -9   8  -2    5.22    1.20
   9   8   2    4.09    1.23
  10   8  -2    5.37    1.51
 -10   8   2    3.13    1.19
  10   8   2    4.49    1.39
 -10   8  -2    5.62    1.30
   0  -9  -2   93.84    3.07
   0  -9  -2   95.32    2.87
   0   9   2   96.96    2.93
   0  -9   2   94.14    2.95
   0   9  -2   96.78    3.07
   0   9   2   94.18    3.18
   1   9  -2   91.74    2.82
  -1   9   2   89.48    2.65
  -1  -9  -2   91.63    2.91
   1  -9   2   82.17    2.89
  -1  -9  -2   88.14    2.91
  -1   9   2   89.61    3.11
   1   9  -2   93.12    2.85
  -1  -9  -2   88.34    2.86
  -1   9  -2   88.35    2.99
  -1   9  -2   88.42    2.38
   1   9   2   87.34    2.87
  -1  -9   2   85.16    2.65
   1  -9  -2   90.76    2.58
  -2   9   2   31.97    1.16
  -2   9   2   32.26    1.64
  -2  -9  -2   30.58    1.56
   2   9  -2   31.06    1.50
  -2  -9  -2   31.81    1.38
  -2   9  -2   27.31    1.47
   2   9   2   27.87    1.42
  -2  -9   2   28.67    1.28
   2  -9  -2   27.44    1.00
  -2  -9   2   28.76    1.09
  -3  -9  -2    6.96    0.58
  -3  -9  -2    5.81    0.63
  -3   9   2    5.84    0.79
   3   9  -2    6.86    0.75
  -3  -9   2    6.32    0.41
  -3   9  -2    5.33    0.74
   3  -9  -2    6.52    0.41
   3   9   2    6.97    0.81
  -3  -9   2    6.22    0.43
  -4  -9  -2   61.54    2.11
  -4   9   2   55.15    2.61
   4   9  -2   59.17    3.06
  -4  -9  -2   65.38    2.69
   4   9   2   55.30    2.56
  -4  -9   2   61.97    1.63
   4  -9  -2   58.39    1.81
  -4  -9   2   57.27    1.63
  -4   9  -2   59.28    2.62
   5   9  -2    6.97    1.02
  -5   9   2    5.42    0.95
  -5  -9  -2    5.30    0.56
  -5   9  -2    5.69    0.95
   5   9   2    5.94    0.97
   5   9   2    5.08    0.66
   5  -9  -2    6.06    0.65
   5  -9  -2    6.08    0.59
   6   9  -2   51.68    2.72
  -6   9   2   48.04    2.58
  -6  -9  -2   51.59    1.87
   6  -9   2   48.23    1.57
   6  -9   2   50.82    1.47
   6  -9  -2   49.82    1.91
   6  -9  -2   48.06    1.77
  -6   9  -2   53.35    2.70
   6   9   2   46.25    1.86
   6   9   2   48.01    2.61
   7   9  -2   19.45    1.76
  -7  -9  -2   22.37    1.10
   7  -9   2   20.08    1.26
  -7   9   2   22.65    1.82
  -7   9  -2   21.61    1.82
   7   9   2   23.11    1.90
   7  -9  -2   22.49    1.20
  -8  -9  -2   11.35    0.89
  -8   9   2   11.10    1.73
   8   9  -2   10.31    1.51
   8  -9   2   12.47    0.92
  -8   9  -2   13.51    1.69
   8  -9  -2   12.32    1.11
   8   9   2   12.14    1.59
   9   9  -2    0.71    0.76
  -9   9   2    1.06    0.98
   9   9   2    0.11    0.84
  -9   9  -2    1.01    0.85
   0  10  -2  167.43    4.58
   0 -10   2  161.10    4.77
   0  10   2  170.44    4.75
   0 -10  -2  162.36    4.65
   0  10   2  176.12    5.13
   0  10  -2  169.67    4.92
  -1 -10  -2   72.72    2.60
  -1 -10  -2   72.26    2.52
  -1 -10  -2   75.30    2.61
   1  10  -2   75.48    2.54
   1  10  -2   76.96    2.57
  -1  10   2   72.48    2.79
  -1  10   2   76.18    2.44
  -1  10  -2   73.86    2.11
   1  10   2   75.83    2.62
   1 -10  -2   75.66    2.29
  -1  10  -2   73.85    2.74
  -2 -10  -2    7.46    0.64
  -2  10   2    6.34    0.48
  -2  10   2    7.53    0.85
  -2 -10  -2    6.67    0.64
   2  10  -2    5.73    0.66
  -2 -10   2    7.74    0.60
  -2 -10   2    6.63    0.53
   2  10   2    7.61    0.76
  -2  10  -2    6.87    0.79
   2 -10  -2    6.86    0.46
  -3 -10  -2   29.60    1.36
  -3  10   2   31.54    1.83
   3  10  -2   31.43    1.68
  -3 -10  -2   29.23    1.39
   3  10   2   32.30    1.71
  -3 -10   2   30.60    1.15
   3 -10  -2   29.33    1.00
  -3 -10   2   28.72    1.09
  -3  10  -2   28.52    1.68
  -4  10   2   64.95    2.91
  -4 -10  -2   62.55    2.29
  -4 -10  -2   65.30    2.27
   4  10  -2   67.85    2.84
   4 -10  -2   61.94    1.78
  -4  10  -2   60.93    2.75
  -4 -10   2   62.42    1.76
   4  10   2   60.56    2.73
  -4 -10   2   61.03    1.74
   4 -10  -2   63.91    1.81
  -5 -10  -2   12.65    0.98
  -5  10   2   14.43    1.37
   5  10  -2   13.57    1.31
  -5 -10  -2   14.36    0.90
   5  10   2   16.86    1.47
   5 -10  -2   14.82    0.72
   5 -10  -2   14.15    0.72
  -5  10  -2   14.58    1.33
  -6 -10  -2   10.47    0.98
   6  10  -2    9.75    1.27
  -6  10   2    9.62    1.26
  -6 -10  -2    9.20    0.73
   6 -10  -2   10.96    0.71
   6  10   2   11.41    1.30
   6 -10  -2   10.40    0.77
  -6  10  -2   12.69    1.37
  -7 -10  -2   19.31    1.04
   7  10  -2   18.32    2.05
  -7  10   2   19.67    1.82
   7 -10  -2   17.83    1.04
   7  10   2   19.63    1.93
  -7  10  -2   18.13    1.76
   8  10  -2   12.40    1.67
  -8  10   2    9.38    1.54
   8  10   2    9.12    1.43
   8 -10  -2   10.47    0.95
  -8  10  -2    9.28    1.55
  -9  10   2    1.69    1.04
   9  10  -2    0.80    0.99
   9  10   2    1.39    1.03
  -9  10  -2    0.71    0.96
   0  11   2  174.96    5.07
   0 -11  -2  176.65    5.05
   0  11  -2  180.38    4.94
   0  11   2  186.96    5.55
   0  11  -2  183.02    5.34
   1  11  -2   35.56    1.61
  -1 -11  -2   35.58    1.66
  -1  11   2   35.75    1.82
  -1  11   2   34.50    1.38
   1  11  -2   33.67    1.53
  -1 -11   2   33.54    1.45
   1  11   2   33.13    1.57
   1 -11  -2   35.08    1.34
  -1  11  -2   32.23    1.68
  -1  11  -2   36.28    1.19
   2  11  -2   11.09    0.93
  -2  11   2   11.85    1.12
  -2  11   2   11.29    0.65
  -2 -11  -2   11.01    0.88
  -2 -11  -2   12.19    0.89
   2  11   2   10.75    0.94
  -2 -11   2   10.91    0.74
  -2  11  -2   11.86    1.06
  -2 -11   2   11.51    0.73
   2 -11  -2   12.72    0.62
  -3  11   2   36.32    2.04
   3  11  -2   35.17    1.87
  -3 -11  -2   37.46    1.61
  -3 -11  -2   37.64    1.63
   3 -11  -2   37.42    1.14
  -3 -11   2   34.10    1.30
  -3 -11   2   37.21    1.37
  -3  11  -2   36.59    2.00
   3  11   2   33.02    1.86
   4  11  -2   16.78    1.38
  -4 -11  -2   14.86    1.02
  -4 -11  -2   18.28    1.02
  -4  11   2   14.45    1.38
  -4  11  -2   16.87    1.43
   4  11   2   16.44    1.35
   4 -11  -2   16.92    0.75
  -4 -11   2   16.73    0.69
  -4 -11   2   14.93    0.67
   4 -11  -2   13.93    0.52
   5  11  -2   19.60    1.60
  -5  11   2   21.28    1.64
  -5 -11  -2   19.53    1.07
   5  11   2   20.81    1.61
  -5  11  -2   19.58    1.65
   5 -11  -2   19.14    0.64
  -6 -11  -2    2.39    0.48
  -6 -11  -2    3.07    0.73
  -6  11   2    2.93    0.82
   6  11  -2    3.20    0.96
  -6  11  -2    2.82    0.80
   6 -11  -2    2.92    0.39
   6 -11  -2    2.48    0.42
   6  11   2    3.78    1.01
   7  11  -2   40.35    2.62
  -7 -11  -2   36.64    1.45
  -7  11  -2   40.50    2.76
   7 -11  -2   40.22    1.40
   7  11   2   44.85    2.78
   8  11  -2    4.77    1.23
  -8  11   2    3.97    1.12
  -8  11  -2    5.02    1.26
   8  11   2    4.11    1.16
  -9  11   2    2.06    1.18
   9  11  -2    0.09    0.86
   9  11   2   -0.69    0.85
  -9  11  -2   -0.86    0.96
   0  12   2  164.18    5.20
   0 -12  -2  165.98    5.13
   0  12   2  158.20    4.73
   0  12  -2  167.02    4.59
   0 -12  -2  154.51    4.64
   0  12  -2  166.43    5.04
  -1  12   2   32.23    1.81
  -1 -12  -2   34.30    1.69
  -1  12   2   35.51    1.43
   1  12  -2   33.77    1.64
   1  12  -2   30.38    1.51
  -1  12  -2   30.27    1.11
   1 -12  -2   30.02    1.25
  -1  12  -2   29.68    1.65
   1  12   2   28.02    1.48
  -2  12   2    8.53    1.00
  -2  12   2    7.64    0.55
   2  12  -2    5.68    0.77
  -2 -12  -2    7.95    0.79
  -2 -12   2    5.78    0.63
   2 -12  -2    6.84    0.49
  -2  12  -2    6.57    1.00
  -2 -12   2    6.54    0.68
   2  12   2    5.44    0.79
  -3 -12  -2   12.67    0.95
   3  12  -2   13.37    1.55
  -3  12   2   14.08    1.30
  -3  12  -2   13.29    1.28
  -3 -12   2   12.35    0.77
   3 -12  -2   13.87    0.71
  -3 -12   2   13.29    0.81
   3  12   2   12.22    1.17
  -4 -12  -2    4.26    0.63
  -4 -12  -2    3.61    0.68
  -4  12   2    5.65    0.92
   4  12  -2    3.88    0.87
  -4 -12   2    4.27    0.44
   4  12   2    5.44    0.95
  -4  12  -2    4.40    0.93
  -4 -12   2    4.74    0.43
   5  12  -2    1.66    0.73
  -5 -12  -2    2.71    0.57
  -5  12   2    1.22    0.70
  -5 -12  -2    2.37    0.68
  -5  12  -2    4.34    1.03
   5  12   2    3.45    0.91
  -6  12   2   13.36    1.54
   6  12  -2   15.64    1.60
  -6 -12  -2   14.82    0.91
   6  12   2   15.17    1.57
  -6  12  -2   15.58    1.65
   7  12  -2    6.28    1.35
  -7  12   2    5.89    1.54
  -7 -12  -2    5.04    0.68
   7  12   2    5.87    1.33
  -7  12  -2    4.77    1.22
   8  12  -2   13.83    1.80
  -8  12   2   11.18    1.74
  -8  12  -2    9.36    1.54
   8  12   2    8.46    1.48
   9  12  -2    0.16    0.96
  -9  12   2    1.72    1.22
  -9  12  -2    1.35    1.08
   9  12   2    1.22    0.98
   0 -13  -2    7.56    0.74
   0 -13  -2    9.23    0.96
   0  13   2    7.90    0.72
   0  13  -2    6.86    0.66
   0  13  -2    8.54    0.94
  -1  13   2   59.04    2.17
   1  13  -2   63.50    2.39
  -1  13   2   66.63    2.84
   1  13  -2   62.71    2.53
  -1 -13  -2   65.98    2.62
  -1  13  -2   63.18    1.94
   1 -13  -2   61.06    2.09
  -1  13  -2   62.86    2.68
   1  13   2   58.80    2.41
  -2  13   2    1.83    0.38
  -2 -13  -2    1.82    0.48
  -2  13   2    1.15    0.51
   2  13  -2    1.40    0.52
  -2 -13   2    1.90    0.54
  -2  13  -2    2.70    0.68
   2 -13  -2    1.13    0.28
  -2 -13   2    1.28    0.47
   2  13   2    0.39    0.44
  -3 -13  -2    7.19    0.77
   3  13  -2    4.89    0.88
  -3  13   2    5.33    1.03
  -3 -13   2    6.02    0.63
  -3  13  -2    5.71    1.00
   3  13   2    5.27    0.93
  -4  13   2    9.65    1.20
   4  13  -2    8.54    1.15
  -4 -13  -2    9.85    0.88
  -4  13  -2   11.83    1.37
   4  13   2   11.67    1.22
   5  13  -2    5.94    1.25
  -5  13   2    6.34    1.10
  -5 -13  -2    4.60    1.23
  -5 -13  -2    6.01    0.71
   5  13   2    5.77    1.08
  -5  13  -2    7.75    1.16
   6  13  -2    4.58    1.14
  -6  13   2    6.73    2.00
  -6 -13  -2    3.47    0.62
   6  13   2    5.20    1.36
  -6  13  -2    5.31    1.34
  -7  13   2   31.01    2.39
   7  13  -2   31.18    2.45
  -7  13  -2   29.51    2.45
   7  13   2   32.76    2.50
  -8  13   2    5.47    1.38
   8  13  -2    4.76    1.20
  -8  13  -2    5.46    1.41
   8  13   2    6.94    1.50
   0  14  -2   22.17    1.49
   0  14   2   24.81    1.37
   0  14  -2   24.63    1.23
   0 -14  -2   27.08    1.64
  -1  14   2   17.85    1.47
  -1 -14  -2   16.00    1.25
   1  14  -2   17.75    1.20
   1  14  -2   19.11    1.34
  -1  14   2   17.95    1.03
  -1  14  -2   16.15    0.81
   1  14   2   16.11    1.18
  -1  14  -2   17.39    1.37
  -2 -14  -2   45.46    2.08
  -2  14   2   41.77    1.51
  -2  14   2   44.23    2.40
   2  14  -2   40.99    2.05
   2  14   2   40.57    3.06
   2 -14  -2   39.65    1.43
  -2  14  -2   42.57    2.31
  -2 -14   2   45.31    1.91
   3  14  -2    4.98    0.91
  -3 -14  -2    5.60    0.81
  -3  14   2    5.93    1.08
  -3 -14   2    4.97    0.67
  -3  14  -2    5.29    0.97
   3  14   2    5.75    0.95
  -4 -14  -2    0.38    0.38
   4  14  -2    0.69    0.61
  -4  14   2    1.49    0.76
  -4 -14   2    1.32    0.37
  -4 -14   2    0.30    0.42
   4  14   2    0.71    0.54
  -4  14  -2    1.59    0.75
  -5  14   2    2.81    0.98
  -5 -14  -2    1.35    0.51
   5  14  -2    0.87    0.65
  -5  14  -2    4.17    1.15
  -6  14   2   28.26    2.33
  -6 -14  -2   27.45    1.30
   6  14  -2   28.71    2.24
  -6  14  -2   28.09    2.30
   6  14   2   27.41    2.18
  -7  14   2    2.81    1.11
   7  14  -2    1.78    1.02
  -7  14  -2    3.07    1.09
   7  14   2    2.42    1.06
  -8  14   2   13.36    2.01
   8  14  -2    8.52    1.77
   8  14   2    7.10    1.58
  -8  14  -2    8.97    1.77
   0  15   2    4.44    0.68
   0 -15  -2    3.58    0.79
   0  15  -2    3.35    0.61
   0  15  -2    3.81    0.80
  -1 -15  -2   67.64    2.81
  -1  15   2   65.33    2.31
  -1  15   2   63.52    3.00
   1  15  -2   62.14    2.53
  -1 -15   2   67.00    2.70
  -1  15  -2   61.99    2.90
   1 -15  -2   61.40    2.20
   1  15   2   66.84    2.68
  -1  15  -2   65.31    2.33
   2  15  -2   28.86    1.96
  -2  15   2   24.80    1.91
  -2  15   2   29.04    1.16
  -2 -15  -2   27.46    1.66
  -2  15  -2   30.26    1.96
  -2 -15   2   29.12    1.60
   2  15   2   31.98    1.83
  -3  15   2    7.38    1.18
   3  15  -2    9.21    1.07
  -3 -15  -2    7.42    0.95
   3  15   2    9.28    1.12
  -3 -15   2    8.86    0.85
  -3  15  -2    7.42    1.19
  -4 -15  -2    9.11    0.91
   4  15  -2    8.47    1.23
  -4  15   2    7.14    1.33
  -4 -15   2    9.98    0.75
  -4 -15   2    8.07    0.80
  -4  15  -2    7.87    1.28
   4  15   2    9.79    1.27
  -5  15   2    3.68    1.04
   5  15  -2    3.80    1.12
  -5 -15  -2    4.86    0.81
  -5  15  -2    7.08    1.31
   5  15   2    4.55    1.15
  -6 -15  -2    4.15    0.80
   6  15  -2    4.43    1.26
  -6  15   2    3.64    1.22
  -6  15  -2    3.66    0.97
   6  15   2    2.04    1.05
  -7  15   2    2.89    1.06
   7  15  -2    0.38    0.92
  -7  15  -2    1.34    1.00
   7  15   2    1.14    0.84
   8  15  -2    2.49    1.39
  -8  15   2    4.16    2.43
  -8  15  -2    7.44    2.02
   8  15   2    5.63    1.52
   0  16  -2    4.20    0.69
   0 -16  -2    4.49    0.97
   0  16   2    4.43    0.74
   0  16  -2    5.11    0.93
  -1  16   2   29.35    1.42
  -1 -16  -2   29.64    1.82
  -1  16   2   29.15    2.05
   1  16  -2   28.10    1.62
  -1  16  -2   29.83    1.97
   1 -16  -2   29.59    1.35
   1  16   2   30.96    1.71
  -2  16   2   56.85    2.93
  -2 -16  -2   57.12    2.50
   2  16  -2   52.12    2.46
  -2  16   2   52.12    1.75
  -2  16  -2   53.59    2.81
   2  16   2   52.06    2.54
  -2 -16   2   53.63    2.34
  -3 -16  -2   18.40    1.35
   3  16  -2   16.26    1.40
  -3  16   2   16.72    1.66
  -3 -16   2   16.44    1.15
  -3  16  -2   18.20    1.68
   3  16   2   17.00    1.49
   4  16  -2    1.40    0.70
  -4 -16  -2    2.11    0.64
  -4  16   2    0.51    0.69
  -4  16  -2    0.62    0.65
   4  16   2    2.02    0.78
  -4 -16   2    1.74    0.49
  -5 -16  -2   12.42    1.08
  -5  16   2   11.60    1.69
  -5  16  -2   11.95    1.66
   5  16   2   13.45    1.61
  -6  16   2    4.56    1.47
   6  16  -2    4.14    1.20
  -6  16  -2    8.57    1.55
   6  16   2    7.32    1.47
  -7  16   2    6.56    1.62
   7  16  -2    8.82    1.70
  -7  16  -2    8.93    1.74
   7  16   2    9.05    1.73
   0  17  -2   14.03    0.99
   0  17  -2   13.10    1.34
   0 -17  -2   13.67    1.39
   0  17   2   11.61    1.11
   1  17  -2    8.92    0.98
  -1  17   2    8.20    0.83
  -1 -17  -2    8.31    1.15
  -1  17  -2    9.55    1.02
  -1  17  -2   10.69    1.33
  -1 -17   2    8.52    1.14
   1 -17  -2   10.40    1.32
   1  17   2   10.47    1.16
  -2  17   2   12.07    0.73
   2  17  -2   12.49    1.24
  -2  17   2   11.69    1.44
  -2 -17  -2   12.24    1.23
  -2  17  -2   11.72    1.55
  -2 -17   2   13.19    1.22
   2  17   2   12.69    1.28
  -3  17   2    5.94    1.28
   3  17  -2    5.28    1.03
  -3 -17  -2    6.44    1.03
   3  17   2    3.42    0.93
  -3  17  -2    2.91    0.90
  -3 -17   2    5.26    0.93
  -4  17   2    8.29    1.51
   4  17  -2    7.58    1.30
  -4 -17  -2    6.71    0.99
  -4 -17   2    6.33    0.79
   4  17   2    5.28    1.13
  -4  17  -2    7.08    1.36
   5  17  -2    9.62    1.46
  -5 -17  -2    7.67    1.19
  -5  17   2   10.22    1.63
  -5  17  -2    8.29    1.50
   5  17   2    9.11    1.46
   6  17  -2    1.25    0.92
  -6  17   2    0.67    1.00
  -6  17  -2    1.07    1.10
   6  17   2    1.96    1.01
   7  17  -2    0.53    0.93
  -7  17   2    0.31    1.26
  -7  17  -2   -0.91    1.02
   7  17   2   -1.85    0.94
   0  18   2   -0.37    0.51
   0  18  -2   -0.31    0.48
   0  18  -2    0.24    0.58
   0 -18  -2    0.51    0.61
  -1  18   2    2.66    0.56
   1  18  -2    1.57    0.77
  -1 -18  -2    1.62    0.79
  -1  18  -2    2.82    1.04
   1 -18  -2    1.85    0.83
  -1 -18   2    2.41    0.80
  -1  18  -2    1.82    0.44
   1  18   2    3.16    0.83
   2  18  -2    5.76    1.05
  -2  18   2    5.80    1.26
  -2 -18  -2    8.39    1.13
   2  18   2    5.23    1.13
  -2 -18   2    6.03    0.99
  -2  18  -2    6.39    1.18
  -3  18   2   11.95    1.73
  -3 -18  -2   15.01    1.38
   3  18  -2   12.72    1.49
  -3  18  -2   12.31    1.67
   3  18   2   13.83    1.46
  -3 -18   2   12.78    1.24
  -4 -18  -2    2.69    0.76
   4  18  -2    3.23    0.88
  -4  18   2    3.17    1.05
  -4  18  -2    2.29    0.98
  -4 -18   2    4.08    0.88
   4  18   2    1.70    1.44
  -5 -18  -2    8.95    1.36
  -5  18   2    8.12    1.73
   5  18  -2    7.61    1.61
  -5  18  -2    7.56    1.67
   5  18   2    9.07    1.51
  -6  18   2   -0.98    0.93
   6  18  -2    0.59    1.02
  -6  18  -2    1.78    1.13
   6  18   2    2.72    1.15
   0 -19   2    1.60    0.78
   0  19   2    2.31    0.75
   0  19  -2    3.03    0.66
   0 -19  -2    1.54    0.99
  -1  19   2    9.48    1.06
  -1 -19  -2   12.42    1.50
   1  19  -2   10.07    1.20
  -1  19  -2   13.58    1.62
  -1  19  -2   10.67    1.10
   1  19   2   12.93    1.35
   1 -19  -2   12.61    1.55
  -1 -19   2   12.33    1.38
   2  19  -2   10.95    1.25
  -2 -19  -2    9.94    1.41
  -2  19   2   12.10    1.67
   2 -19  -2    9.83    1.46
  -2  19  -2   11.57    1.92
   2  19   2    9.99    1.34
  -2 -19   2   12.86    1.32
  -3 -19  -2    8.76    1.34
   3  19  -2    5.52    1.19
  -3  19   2    7.14    1.45
  -3 -19   2    8.80    2.03
   3  19   2    9.16    1.41
  -3  19  -2    6.26    1.49
  -4  19   2   19.70    2.17
   4  19  -2   21.42    1.91
  -4 -19  -2   19.73    1.67
   4  19   2   21.04    1.89
  -4  19  -2   18.34    2.06
   5  19  -2    1.87    1.04
  -5  19   2    4.85    1.53
   5  19   2    2.84    1.13
  -5  19  -2    3.85    1.48
  -6  19   2    2.92    1.42
   6  19  -2    3.31    1.27
   6  19   2    4.17    1.39
  -6  19  -2    2.53    1.35
   0 -20   2   20.38    1.82
   0  20   2   18.58    1.55
   0  20  -2   15.67    1.36
   0 -20  -2   17.66    1.77
   1  20  -2    8.47    1.21
  -1  20   2    8.76    1.12
  -1 -20  -2   12.51    1.52
   1 -20  -2   10.99    1.61
   1  20   2   10.38    1.38
  -1 -20   2   10.04    1.41
   2  20  -2    5.50    1.15
  -2 -20  -2    3.99    1.06
   2  20   2    5.39    1.21
  -2 -20   2    5.39    1.07
  -2  20  -2    3.97    1.20
   2 -20  -2    5.10    1.38
  -3  20   2   16.07    2.09
  -3 -20  -2   11.42    1.47
   3  20  -2   14.28    1.59
   3  20   2   14.96    2.64
  -3 -20   2   11.89    1.46
  -3  20  -2   12.93    1.83
   4  20  -2    2.50    0.96
  -4 -20  -2    2.30    1.10
  -4  20   2    4.09    1.21
   4  20   2    3.83    1.20
  -4  20  -2    4.52    1.39
   5  20  -2    4.05    1.26
  -5  20   2    5.86    1.97
  -5  20  -2    9.42    3.15
   5  20   2    6.98    1.38
   0 -21   2    8.98    2.22
   0 -21  -2    9.53    1.59
  -1 -21  -2    7.51    2.42
   1  21  -2    6.18    1.36
   1 -21   2    3.86    1.34
   1 -21  -2    6.33    1.57
  -1 -21   2    7.19    1.48
   1  21   2    5.37    1.14
   2  21  -2    2.10    0.94
  -2 -21  -2    2.83    1.27
   2 -21  -2    2.37    1.09
  -2  21  -2    2.30    1.12
   2  21   2    1.21    1.06
  -2 -21   2    3.39    1.07
   3  21  -2    9.61    1.71
  -3 -21  -2    9.34    1.68
   3 -21  -2   10.89    1.97
   3  21   2    7.63    1.61
  -3  21  -2    9.20    1.88
   4  21  -2   11.36    1.75
  -4  21   2   15.82    2.47
   4  21   2   16.05    2.01
  -4  21  -2   13.78    2.17
   0 -22  -2   15.23    1.99
   0 -22   2   21.01    2.10
   1 -22   2    2.63    1.22
  -1 -22  -2    0.38    1.12
   1  22   2    2.03    1.16
  -1 -22   2    0.70    1.78
   1 -22  -2    2.40    1.38
   2  22  -2    2.26    1.17
  -2 -22  -2    2.07    1.16
   2 -22  -2    1.11    1.20
  -2 -22   2    0.45    1.19
   2  22   2    1.44    1.17
  -2  22  -2    1.02    1.36
   3  22  -2    8.50    1.84
  -3 -22  -2   10.65    2.08
   3  22   2    7.65    1.38
   3 -22  -2    5.78    1.53
  -3  22  -2   15.08    2.19
   0 -23  -2   -0.76    1.09
   0 -23   2    0.27    1.24
   1 -23   2    6.34    1.44
  -1 -23  -2    3.43    1.32
   1 -23  -2    4.68    1.69
  -1 -23   2    3.56    1.46
   0   0   3    0.28    0.11
   0   0  -3    0.18    0.09
   0   0   3    0.12    0.08
   0   0  -3    0.05    0.07
   1   0  -3   33.37    1.03
   1   0   3   33.52    1.09
  -1   0  -3   32.57    1.09
   1   0  -3   33.74    1.01
   1   0   3   33.28    1.09
   1   0  -3   34.31    1.17
  -1   0  -3   33.56    1.08
  -2   0  -3   39.10    1.33
   2   0  -3   39.59    1.20
   2   0   3   39.63    1.33
  -2   0   3   37.91    1.21
  -2   0  -3   37.40    1.29
   2   0   3   35.99    1.29
   3   0   3   80.60    2.46
   3   0  -3   73.14    2.21
  -3   0  -3   76.40    2.39
  -3   0   3   78.35    2.27
  -3   0  -3   76.84    2.42
   3   0   3   78.11    2.40
   4   0   3  173.65    4.84
   4   0   3  165.85    4.73
  -4   0  -3  159.50    4.72
  -4   0  -3  174.18    4.80
  -4   0   3  168.06    4.57
   4   0  -3  160.12    4.51
   4   0  -3  173.19    4.87
   5   0  -3   43.25    1.90
  -5   0   3   40.11    1.61
  -5   0  -3   41.27    1.76
   5   0   3   43.52    1.86
   6   0  -3   18.14    1.09
   6   0   3   20.71    1.37
  -6   0   3   21.64    1.17
   6   0  -3   23.71    1.46
  -6   0  -3   20.72    1.29
   7   0   3   18.49    1.44
  -7   0   3   18.34    1.22
   7   0  -3   19.36    1.50
  -7   0  -3   19.81    1.77
   8   0  -3   17.15    1.49
  -8   0  -3   16.35    1.35
   8   0   3   15.16    1.41
  -8   0   3   15.43    1.19
  -9   0   3    0.25    0.68
   9   0   3    0.25    0.63
  -9   0  -3    1.01    0.63
   9   0  -3   -0.86    0.62
  10   0  -3    4.56    1.13
 -10   0   3    4.46    1.21
 -10   0  -3    3.91    1.13
  10   0   3    3.01    1.02
   0   1   3   46.62    1.37
   0  -1  -3   47.06    1.40
   0   1  -3   45.98    1.31
   0  -1   3   49.44    1.40
   0  -1  -3   46.42    1.37
   0   1  -3   47.56    1.38
   0  -1   3   44.74    1.31
  -1   1   3   95.11    2.68
   1   1  -3   96.70    2.44
  -1  -1  -3   95.86    2.65
   1  -1   3   97.74    2.64
  -1   1   3   95.73    2.63
   1  -1   3   97.43    2.57
  -1  -1  -3   98.27    2.64
   1  -1  -3   98.40    2.71
  -1  -1   3   98.63    2.47
   1   1   3   98.09    2.69
  -1   1  -3   96.95    2.58
  -1   1  -3   99.77    2.67
   1   1   3   96.55    2.65
   1  -1  -3   96.92    2.64
  -2  -1  -3    9.48    0.53
   2   1  -3    9.02    0.46
   2  -1   3    9.52    0.55
  -2   1   3    9.68    0.53
   2  -1   3    9.06    0.50
  -2  -1  -3    8.77    0.54
  -2   1  -3    9.71    0.51
   2  -1  -3   10.71    0.54
   2   1   3   10.56    0.56
  -2  -1   3   10.98    0.44
   2   1   3   10.44    0.61
   2  -1  -3   10.51    0.62
   3   1  -3  150.32    3.96
  -3  -1  -3  150.34    4.28
  -3  -1  -3  161.88    4.25
   3  -1   3  156.65    4.21
   3  -1   3  145.98    4.24
   3   1   3  151.55    4.17
  -3   1  -3  152.80    4.26
  -3   1  -3  149.22    4.12
   3   1   3  154.93    4.31
  -3  -1   3  149.42    3.95
   3  -1  -3  151.67    4.11
   4  -1   3  137.24    4.02
  -4  -1  -3  129.48    4.03
  -4   1   3  144.32    3.96
   4  -1   3  126.05    3.98
   4   1  -3  139.28    3.74
   4   1  -3  141.89    4.19
  -4  -1  -3  142.16    4.02
  -4   1  -3  134.16    4.02
   4  -1  -3  136.10    4.00
   4   1   3  131.75    3.89
  -4  -1   3  134.95    3.69
   4   1   3  137.34    4.09
   4  -1  -3  134.51    3.83
   5  -1   3   29.93    1.45
   5   1  -3   29.08    1.21
  -5  -1  -3   29.24    1.42
  -5   1   3   26.68    1.29
   5   1  -3   31.66    1.60
  -5   1  -3   31.36    1.51
   5  -1  -3   31.33    1.53
  -5  -1   3   28.59    1.22
   5   1   3   30.97    1.56
   5  -1  -3   27.18    1.29
  -6  -1  -3    2.74    0.54
   6   1  -3    2.48    0.44
   6   1  -3    2.66    0.92
   6  -1   3    3.15    0.69
  -6   1   3    2.54    0.51
  -6  -1   3    2.67    0.50
  -6   1  -3    2.92    0.64
   6  -1  -3    2.03    0.56
   6   1   3    2.74    0.63
  -7   1   3   19.43    1.29
   7  -1   3   18.41    1.40
   7   1  -3   20.53    1.54
  -7  -1  -3   18.19    1.31
  -7  -1   3   19.05    1.20
   7  -1  -3   19.80    1.48
   7   1   3   20.21    1.52
  -7   1  -3   16.89    1.35
  -8   1   3    3.56    0.84
   8   1  -3    5.36    1.06
   8  -1   3    4.34    0.93
  -8  -1  -3    5.26    0.90
  -8   1  -3    5.78    0.99
   8  -1  -3    4.97    0.97
   8   1   3    5.03    1.09
  -8  -1   3    3.56    0.75
   9   1  -3    4.99    1.51
  -9   1   3    3.95    0.87
   9  -1   3    5.37    1.09
  -9  -1  -3    4.60    1.02
   9  -1  -3    4.77    1.12
   9   1   3    5.26    1.13
  -9   1  -3    4.64    0.93
 -10  -1  -3    5.14    1.15
  10   1  -3    3.81    1.05
  10  -1   3    5.98    1.33
 -10   1   3    4.61    1.14
  10   1   3    4.38    1.17
  10  -1  -3    4.57    1.13
 -10  -1   3    4.38    1.22
   0  -2   3   77.37    2.11
   0  -2  -3   74.93    2.15
   0  -2   3   77.93    2.06
   0  -2  -3   75.27    2.15
   0   2   3   75.45    2.16
   0   2  -3   77.68    2.05
   0   2  -3   79.47    2.12
   0   2   3   74.41    2.14
   1   2  -3   61.10    1.57
  -1   2   3   63.76    1.87
  -1  -2  -3   64.30    1.85
   1  -2   3   62.59    1.85
  -1   2   3   60.74    1.88
   1  -2   3   61.98    1.70
  -1  -2  -3   62.70    1.88
  -1  -2   3   61.25    1.54
   1   2   3   60.50    1.84
   1  -2  -3   59.46    1.79
  -1   2  -3   61.68    1.82
   1   2   3   60.94    1.79
   1  -2  -3   59.38    1.81
   2  -2   3   19.57    0.74
  -2   2   3   19.31    0.86
  -2  -2  -3   18.16    0.86
   2   2  -3   19.39    0.55
  -2  -2  -3   19.05    0.82
   2  -2  -3   17.34    0.81
   2   2   3   16.75    0.74
   2  -2  -3   16.79    0.76
  -2   2  -3   16.19    0.81
  -2   2  -3   17.86    0.68
   2   2   3   17.51    0.84
  -3  -2  -3  175.46    4.72
  -3  -2  -3  177.34    5.19
   3   2  -3  170.96    4.88
   3   2  -3  169.90    4.37
   3  -2   3  175.55    4.65
  -3   2   3  175.34    4.79
   3  -2   3  177.78    4.94
  -3   2  -3  177.60    5.03
   3   2   3  188.92    5.11
  -3   2  -3  183.14    4.81
   3  -2  -3  179.95    4.91
   3   2   3  176.50    4.87
  -3  -2   3  185.43    4.58
   4  -2   3  138.18    3.87
   4   2  -3  135.31    4.13
   4  -2   3  124.41    3.94
  -4   2   3  134.17    3.92
  -4  -2  -3  136.03    3.86
   4   2  -3  128.12    3.52
  -4  -2  -3  133.49    4.34
   4  -2  -3  122.98    3.99
  -4   2  -3  136.21    3.82
  -4   2  -3  140.50    4.08
  -4  -2   3  133.38    3.57
   4   2   3  135.34    4.11
   4   2   3  133.04    4.12
   5  -2   3   18.93    1.10
  -5   2   3   19.04    1.11
   5   2  -3   19.02    0.89
   5   2  -3   21.41    1.32
  -5  -2  -3   19.59    1.08
  -5  -2   3   18.41    0.87
   5  -2  -3   20.00    1.17
   5   2   3   18.63    1.23
  -5   2  -3   20.15    1.21
   5   2   3   20.42    1.07
   5  -2  -3   16.09    1.03
  -6   2   3   12.96    1.00
   6   2  -3   14.65    1.19
  -6  -2  -3   12.00    0.93
   6   2  -3   10.19    0.75
   6  -2   3   11.89    1.01
   6  -2  -3   11.68    1.02
  -6   2  -3   10.92    1.05
   6   2   3   11.08    1.26
  -6  -2   3   12.37    0.80
   7   2  -3   30.22    1.90
   7   2  -3   26.44    1.35
  -7  -2  -3   27.24    1.55
  -7   2   3   30.37    1.69
   7  -2   3   27.01    2.01
  -7  -2   3   27.04    1.34
   7  -2  -3   30.30    1.74
   7   2   3   29.40    1.87
  -7   2  -3   27.50    1.71
  -8  -2  -3    1.19    0.59
  -8   2   3    2.47    0.80
   8   2  -3    2.63    0.88
   8  -2   3    1.23    0.59
   8   2   3    0.81    0.66
  -8   2  -3    2.57    0.78
   8  -2  -3    2.22    0.75
  -8  -2   3    1.30    0.53
   9  -2   3    5.77    1.14
   9   2  -3    6.39    1.30
  -9  -2  -3    4.83    1.02
  -9   2   3    6.32    1.08
  -9   2  -3    5.40    1.15
   9   2   3    7.23    1.86
  -9  -2   3    5.89    1.01
   9  -2  -3    5.83    1.17
  10  -2   3    2.03    0.87
 -10  -2  -3    0.96    0.93
  10   2  -3    2.70    1.05
 -10   2   3    4.16    1.19
  10   2   3    0.63    0.91
 -10   2  -3    1.62    0.98
  10  -2  -3   -0.08    0.80
   0   3   3   19.24    0.78
   0   3   3   19.17    0.77
   0   3  -3   17.61    0.69
   0   3  -3   17.07    0.67
   0  -3   3   16.67    0.66
   0  -3  -3   17.89    0.74
  -1   3   3   91.98    2.67
  -1  -3  -3   91.40    2.58
   1  -3   3   90.26    2.34
  -1  -3  -3   87.85    2.60
   1  -3   3   90.31    2.59
   1   3  -3   91.62    2.28
  -1   3   3   92.93    2.57
   1  -3  -3   85.43    2.38
   1  -3  -3   87.48    2.50
   1   3   3   84.79    2.42
  -1   3  -3   82.85    2.19
  -1  -3   3   86.10    2.14
  -1   3  -3   83.83    2.44
   1   3   3   83.22    2.48
  -2   3   3  238.76    6.30
  -2  -3  -3  246.37    6.19
   2  -3   3  243.19    5.96
   2  -3   3  235.68    6.28
  -2  -3  -3  233.90    6.29
   2   3   3  244.02    6.26
   2   3   3  233.62    6.06
   2  -3  -3  234.42    6.09
  -2   3  -3  234.21    6.21
  -2   3  -3  233.69    5.84
   2  -3  -3  233.42    6.16
  -3  -3  -3   89.84    2.89
   3   3  -3   91.09    2.30
  -3   3   3   89.86    2.85
   3  -3   3   94.83    2.60
  -3  -3  -3   91.28    2.71
   3   3  -3   93.02    2.95
   3  -3   3   87.50    2.85
   3  -3  -3   90.07    2.77
  -3  -3   3   91.22    2.28
   3   3   3   86.60    2.64
   3   3   3   93.04    2.93
   3  -3  -3   88.73    2.76
  -3   3  -3   87.07    2.84
  -3   3  -3   90.55    2.53
  -4   3   3  104.33    3.36
   4   3  -3  106.70    2.84
  -4  -3  -3  110.20    3.24
   4   3  -3  110.53    3.56
   4  -3   3  106.43    3.16
  -4  -3   3  105.42    2.79
   4   3   3  105.75    3.14
   4   3   3  103.68    3.45
   4  -3  -3  100.78    3.22
  -4   3  -3  106.31    3.40
   5   3  -3  167.97    5.20
  -5  -3  -3  166.86    4.78
   5   3  -3  162.97    4.38
  -5   3   3  160.16    4.93
   5  -3   3  170.21    4.78
   5  -3  -3  165.58    4.77
   5   3   3  155.43    4.61
   5   3   3  162.03    5.04
  -5  -3   3  161.17    4.28
  -5   3  -3  159.58    4.94
   6   3  -3    1.77    0.37
   6  -3   3    2.59    0.55
  -6  -3  -3    2.04    0.49
  -6   3   3    1.62    0.53
   6   3  -3    1.36    0.59
   6   3   3    2.10    0.64
  -6  -3   3    2.64    0.41
   6  -3  -3    3.21    0.69
  -6   3  -3    1.75    0.62
  -7   3   3   15.44    1.28
   7   3  -3   14.02    1.35
  -7  -3  -3   14.61    1.07
   7  -3   3   15.92    1.21
   7   3  -3   11.89    0.90
   7  -3  -3   13.62    1.16
   7   3   3   13.54    1.30
  -7  -3   3   12.98    0.85
  -7   3  -3   16.04    1.35
  -8  -3  -3    4.23    0.81
   8  -3   3    2.86    0.80
   8   3  -3    2.76    0.90
  -8   3   3    2.84    0.79
  -8  -3   3    2.69    0.55
   8  -3  -3    3.58    0.83
   8   3   3    3.76    1.05
  -8   3  -3    2.85    0.77
  -9  -3  -3    1.49    0.70
   9   3  -3    1.83    0.86
  -9   3   3    1.24    0.72
   9  -3   3    0.88    0.69
   9   3   3    2.01    0.81
   9  -3  -3    1.67    0.80
  -9  -3   3    1.56    0.69
  -9   3  -3    1.78    0.81
  10  -3   3    7.56    1.45
  10   3  -3   10.46    1.61
 -10   3   3    8.49    1.60
 -10  -3  -3    6.79    1.25
 -10   3  -3    8.38    1.55
  10   3   3   10.25    1.65
  10  -3  -3    9.27    1.43
   0  -4   3   59.24    1.74
   0  -4  -3   58.40    1.90
   0  -4  -3   58.89    1.88
   0   4   3   61.42    1.85
   0  -4  -3   59.48    1.81
   0   4  -3   58.98    1.75
   1  -4   3  252.31    6.57
  -1   4   3  260.08    6.51
  -1   4   3  255.86    6.69
  -1  -4  -3  261.73    6.57
  -1  -4  -3  249.48    6.60
   1   4  -3  255.02    6.27
   1  -4  -3  250.68    6.63
  -1   4  -3  253.83    6.21
   1   4   3  258.38    6.54
   1  -4  -3  257.72    6.46
  -2  -4  -3   75.88    2.45
   2   4  -3   80.28    2.48
   2  -4   3   77.78    2.02
   2  -4   3   74.09    2.42
  -2   4   3   76.43    2.49
  -2  -4  -3   79.58    2.37
  -2   4   3   76.26    2.31
  -2   4  -3   81.47    2.07
   2  -4  -3   80.68    2.52
  -2   4  -3   81.71    2.55
   2  -4  -3   78.65    2.34
   2   4   3   78.25    2.37
   2   4   3   78.18    2.54
   3   4  -3   75.72    2.59
   3  -4   3   73.04    2.10
  -3   4   3   76.01    2.54
  -3  -4  -3   79.79    2.34
  -3  -4  -3   69.27    2.48
   3  -4   3   70.30    2.47
   3  -4  -3   71.07    2.40
   3  -4  -3   73.84    2.32
   3   4   3   75.48    2.56
   3   4   3   70.60    2.25
  -3   4  -3   71.18    2.48
  -4   4   3   20.61    1.18
   4  -4   3   21.99    0.98
   4   4  -3   21.96    1.28
  -4  -4  -3   20.32    1.01
   4  -4  -3   18.80    1.04
  -4  -4   3   21.18    0.66
   4  -4  -3   20.02    1.65
   4   4   3   19.90    1.22
  -4   4  -3   20.14    1.18
   4   4   3   18.02    0.94
  -5   4   3   55.34    2.30
  -5  -4  -3   57.59    2.10
   5   4  -3   59.58    2.52
   5  -4   3   57.52    2.04
   5   4  -3   57.86    1.71
   5   4   3   56.15    2.44
   5  -4  -3   53.31    2.18
   5  -4  -3   57.32    2.13
   5   4   3   54.69    2.03
  -5  -4   3   56.49    1.67
  -5   4  -3   58.02    2.40
   6  -4   3   35.61    1.62
   6   4  -3   35.96    1.31
   6   4  -3   40.19    2.11
  -6  -4  -3   34.46    1.62
  -6   4   3   35.75    1.86
   6   4   3   33.28    1.95
  -6   4  -3   36.90    1.93
   6  -4  -3   31.89    1.65
  -6  -4   3   34.92    1.27
  -7  -4  -3   17.04    1.16
   7  -4   3   17.20    1.17
   7   4  -3   15.81    1.45
  -7   4   3   18.41    1.34
   7   4  -3   16.17    0.92
   7   4   3   16.97    1.49
  -7   4  -3   15.99    1.40
  -7  -4   3   17.42    0.89
   7  -4  -3   14.80    1.79
  -8   4   3    4.76    1.04
  -8  -4  -3    5.75    1.19
   8   4  -3    6.08    1.11
   8  -4   3    4.70    0.90
   8   4   3    5.10    1.13
   8  -4  -3    4.35    0.91
  -8   4  -3    4.63    0.98
  -8  -4   3    4.08    0.61
   9   4  -3   21.42    1.98
  -9  -4  -3   17.07    1.41
  -9   4   3   16.22    1.60
   9  -4   3   13.02    1.44
   9  -4  -3   17.49    1.57
   9   4   3   15.38    1.69
  -9   4  -3   19.79    1.75
  -9  -4   3   16.36    1.22
  10   4  -3    0.65    0.84
 -10   4   3    2.25    1.06
 -10  -4  -3    0.40    1.00
  10  -4   3    1.47    0.88
 -10   4  -3    0.92    0.88
  10  -4  -3    1.18    0.85
  10   4   3    0.76    0.85
   0   5  -3   75.75    2.18
   0   5   3   74.64    2.24
   0  -5   3   71.15    2.14
   0  -5  -3   71.55    2.31
   0  -5  -3   74.29    2.21
   0  -5  -3   76.47    2.33
   1  -5   3   55.20    1.84
  -1  -5  -3   54.25    2.01
   1   5  -3   56.32    1.60
  -1   5   3   57.02    1.96
  -1   5   3   56.08    1.75
  -1  -5  -3   55.41    1.86
  -1  -5   3   57.21    1.61
   1  -5  -3   58.08    1.75
   1   5   3   57.64    1.92
   1   5   3   55.93    1.83
  -1   5  -3   55.75    1.51
   1  -5  -3   56.31    1.93
  -1   5  -3   56.77    1.90
   2   5  -3  118.84    3.53
  -2  -5  -3  119.02    3.36
  -2   5   3  115.97    3.58
   2  -5   3  121.77    3.70
  -2   5   3  116.58    3.31
  -2   5  -3  120.11    3.52
   2   5   3  113.40    3.28
   2   5   3  118.06    3.52
  -2  -5   3  115.51    2.84
   2  -5  -3  119.56    3.38
  -2  -5   3  112.96    2.84
  -3   5   3   32.84    1.51
   3   5  -3   34.80    1.56
   3  -5   3   32.96    1.03
   3  -5   3   29.28    1.44
  -3  -5  -3   33.18    1.30
   3   5   3   32.18    1.49
  -3   5  -3   28.85    1.42
   3  -5  -3   30.26    1.21
   3   5   3   31.09    1.23
   3  -5  -3   28.99    1.36
   4  -5   3    9.39    0.57
  -4  -5  -3    9.69    0.66
   4   5  -3    8.94    0.85
  -4   5   3    9.75    0.81
   4   5   3    8.18    0.82
   4   5   3    8.19    0.60
  -4   5  -3    8.24    0.79
   4  -5  -3    8.99    0.68
   5   5  -3   19.84    0.74
   5   5  -3   20.21    1.97
   5  -5   3   19.97    1.01
  -5   5   3   18.14    1.27
  -5  -5  -3   20.22    1.06
   5  -5  -3   17.02    1.07
   5  -5  -3   17.09    1.02
  -5   5  -3   18.63    1.31
   5   5   3   17.29    1.32
   5   5   3   16.71    0.98
  -5  -5   3   17.37    0.61
  -6   5   3   39.45    2.41
   6  -5   3   43.26    1.77
  -6  -5  -3   43.95    1.80
   6   5  -3   42.14    2.26
   6   5  -3   39.72    1.32
   6   5   3   40.65    2.19
   6  -5  -3   39.86    1.79
  -6   5  -3   41.62    2.12
  -6  -5   3   38.64    1.27
   7   5  -3    2.85    0.77
   7  -5   3    3.30    0.65
  -7   5   3    2.56    0.67
  -7  -5  -3    3.10    0.68
   7   5  -3    2.31    0.44
   7  -5  -3    2.80    0.66
   7   5   3    4.15    0.98
  -7   5  -3    1.84    0.67
  -8  -5  -3    2.62    0.61
   8   5  -3    2.30    0.88
   8  -5   3    3.72    1.28
  -8   5   3    2.80    0.89
  -8   5  -3    5.30    1.07
   8  -5  -3    3.95    0.89
   8   5   3    2.53    0.85
  -8  -5   3    3.43    0.76
   9   5  -3    8.96    1.47
   9  -5   3    6.30    1.07
  -9  -5  -3    5.58    1.05
  -9   5   3    6.27    1.34
  -9   5  -3    6.30    1.43
   9   5   3    6.66    1.42
   9  -5  -3    8.45    1.26
  10  -5   3    2.59    0.93
 -10   5   3    3.43    1.18
  10   5  -3    2.33    0.99
  10  -5  -3    3.73    1.34
 -10   5  -3    2.29    1.06
  10   5   3    3.01    1.16
   0   6   3  104.67    3.29
   0   6  -3  110.17    3.26
   0  -6  -3  106.33    3.20
   0  -6  -3  108.14    3.06
   0   6  -3  108.47    2.93
   0  -6  -3  107.16    3.21
   0  -6   3  106.21    3.02
   1   6  -3  136.02    3.77
  -1  -6  -3  137.00    3.82
  -1   6   3  135.83    3.68
  -1  -6  -3  133.38    3.82
   1  -6   3  126.51    3.78
   1   6  -3  131.54    3.56
  -1  -6  -3  138.23    3.86
   1   6   3  126.71    3.67
   1  -6  -3  130.00    3.92
  -1   6  -3  124.14    3.15
  -1   6  -3  123.96    3.65
   1  -6  -3  130.66    3.46
  -1   6  -3  123.74    3.18
  -1  -6   3  124.62    3.33
   2  -6   3   88.17    3.00
  -2   6   3  100.56    2.83
   2   6  -3  102.73    3.11
  -2  -6  -3   93.77    3.04
  -2  -6  -3  101.42    2.93
  -2   6   3   96.54    3.16
   2   6   3   93.98    3.06
   2   6   3   95.75    2.86
   2  -6  -3   92.19    3.04
  -2  -6   3   98.44    2.48
   2  -6  -3   98.85    2.73
  -2   6  -3   93.91    3.05
  -3   6   3   18.85    1.15
  -3  -6  -3   18.90    0.94
   3   6  -3   19.38    1.17
   3  -6   3   20.39    0.59
  -3   6  -3   17.96    1.11
   3   6   3   20.22    1.17
   3   6   3   18.64    0.92
   3  -6  -3   18.19    0.87
   4   6  -3   20.46    1.30
  -4  -6  -3   19.56    0.99
  -4   6   3   17.88    1.21
   4  -6   3   18.77    0.77
   4   6   3   15.28    0.86
   4  -6  -3   16.51    0.91
  -4   6  -3   16.55    1.17
   4   6   3   13.55    1.09
  -5   6   3   63.86    2.68
   5  -6   3   66.15    2.11
   5   6  -3   60.91    2.71
  -5  -6  -3   68.26    2.30
   5  -6  -3   63.87    2.35
   5  -6  -3   67.18    2.28
   5   6   3   66.30    2.81
   5   6   3   61.16    2.23
  -5   6  -3   66.39    3.87
   6   6  -3   68.06    3.06
  -6   6   3   69.29    2.94
  -6  -6  -3   68.35    2.46
   6  -6   3   70.58    2.40
  -6   6  -3   66.33    2.94
   6  -6  -3   69.39    2.52
   6   6   3   69.84    3.07
  -7  -6  -3   12.75    0.99
   7  -6   3   14.53    1.03
   7   6  -3   15.54    1.46
  -7   6   3   12.87    1.29
   7   6   3   16.93    1.52
   7  -6  -3   14.29    1.14
  -7   6  -3   14.86    1.43
  -8  -6  -3    9.28    0.92
   8   6  -3    7.24    1.61
  -8   6   3    7.29    1.41
   8  -6   3    7.16    0.90
   8   6   3    7.73    1.27
   8  -6  -3    8.26    1.08
  -8   6  -3    7.10    1.27
  -9   6   3    3.42    1.01
   9  -6   3    5.62    1.05
  -9  -6  -3    3.25    0.81
   9   6  -3    3.66    1.00
   9   6   3    3.82    1.12
   9  -6  -3    3.50    0.94
  -9   6  -3    4.49    1.14
 -10   6   3    2.42    1.11
  10   6  -3    0.82    1.01
 -10   6  -3    2.15    1.00
  10   6   3    2.27    1.04
  10  -6  -3    0.67    0.94
   0   7   3    8.98    0.61
   0   7  -3    6.73    0.54
   0  -7  -3    7.59    0.55
   0  -7  -3    9.58    0.68
   0   7  -3    8.27    0.49
   0  -7   3    7.92    0.53
  -1   7   3  191.01    5.52
   1  -7   3  187.41    5.56
  -1  -7  -3  192.62    5.33
  -1  -7  -3  197.50    5.36
  -1  -7  -3  193.01    5.36
   1   7  -3  193.38    5.11
  -1   7   3  206.51    5.20
   1   7  -3  197.35    5.29
   1  -7  -3  185.08    5.35
  -1   7  -3  192.29    5.31
  -1   7  -3  191.18    4.74
  -1  -7   3  190.86    4.96
   1   7   3  191.77    5.29
   1  -7  -3  195.16    5.04
  -2  -7  -3   83.00    2.85
  -2   7   3   87.67    3.02
   2  -7   3   87.14    2.88
  -2   7   3   91.28    2.62
   2   7  -3   91.91    2.92
  -2  -7  -3   87.40    2.74
   2   7   3   91.83    3.03
   2   7   3   85.63    2.77
  -2  -7   3   90.25    2.43
   2  -7  -3   92.94    2.63
  -2  -7   3   91.27    2.47
  -2   7  -3   93.31    3.05
   2  -7  -3   92.91    3.37
   3   7  -3    7.30    0.73
  -3   7   3    6.10    0.69
  -3  -7  -3    6.66    0.55
   3   7   3    5.61    0.53
   3  -7  -3    5.92    0.45
  -3   7  -3    5.83    0.67
   3   7   3    6.68    0.69
  -4  -7  -3   27.14    1.23
  -4   7   3   26.77    1.55
   4   7  -3   28.75    1.58
   4  -7   3   26.17    0.84
   4   7   3   27.75    1.56
  -4   7  -3   25.43    1.50
   4  -7  -3   24.47    1.13
  -5  -7  -3   76.57    2.53
  -5   7   3   74.25    3.11
   5   7  -3   74.23    3.09
   5  -7   3   72.95    2.21
   5  -7  -3   75.38    2.45
  -5   7  -3   73.19    3.03
   5   7   3   76.77    3.11
   5  -7  -3   69.62    2.70
   5   7   3   72.20    2.49
  -6   7   3   31.53    1.88
   6  -7   3   30.05    1.30
   6   7  -3   28.96    1.92
  -6  -7  -3   29.62    1.42
   6   7   3   28.35    1.91
   6  -7  -3   31.32    1.46
  -6   7  -3   29.75    1.91
  -7  -7  -3   16.42    1.05
   7  -7   3   15.22    1.01
  -7   7   3   16.94    1.47
   7   7  -3   15.85    1.56
  -7   7  -3   16.42    1.51
   7  -7  -3   16.76    1.17
   7   7   3   15.29    1.55
   8   7  -3    5.38    1.19
   8  -7   3    6.81    0.86
  -8  -7  -3    6.44    0.84
  -8   7   3    5.42    1.19
  -8   7  -3    9.03    1.29
   8   7   3    9.74    1.34
   8  -7  -3    6.28    1.00
  -9  -7  -3    5.24    1.10
   9  -7   3    4.14    1.08
  -9   7   3    5.15    1.38
   9   7  -3    5.30    1.33
   9   7   3    6.03    1.33
  -9   7  -3    3.39    0.98
   9  -7  -3    5.24    1.18
 -10   7   3    1.79    1.08
  10   7  -3    0.16    1.44
  10   7   3    0.22    1.11
 -10   7  -3    3.00    1.16
   0   8  -3  113.24    3.37
   0   8  -3  113.61    3.16
   0  -8   3  109.54    3.28
   0  -8  -3  113.20    3.52
   0   8   3  115.59    3.36
   0  -8  -3  109.78    3.28
   0  -8  -3  114.38    3.50
   1  -8   3   24.28    1.20
  -1   8   3   29.25    1.29
   1   8  -3   27.44    1.21
   1   8  -3   25.31    1.11
  -1  -8  -3   26.89    1.25
  -1  -8  -3   27.27    1.27
  -1   8   3   26.98    1.39
  -1  -8  -3   25.28    1.21
  -1   8  -3   24.17    0.83
   1  -8  -3   23.77    1.23
   1   8   3   24.40    1.21
  -1   8  -3   24.18    1.24
  -1   8  -3   25.39    0.82
  -1  -8   3   25.32    1.01
   1  -8  -3   25.42    1.03
   2   8  -3   84.65    2.82
  -2   8   3   83.06    2.52
  -2  -8  -3   82.25    2.67
  -2   8   3   83.10    2.99
   2  -8  -3   83.76    2.46
  -2  -8   3   83.51    2.35
   2   8   3   85.64    2.92
  -2   8  -3   84.76    2.95
  -2  -8   3   84.98    2.41
   3   8  -3   38.69    1.81
  -3  -8  -3   38.37    1.54
  -3   8   3   38.79    1.90
  -3  -8   3   36.74    1.06
   3   8   3   38.15    1.78
  -3   8  -3   35.70    1.78
   3  -8  -3   36.80    1.31
  -4   8   3   19.86    1.39
  -4  -8  -3   18.83    1.02
   4   8  -3   19.04    1.33
   4  -8  -3   16.13    0.86
   4   8   3   17.99    1.29
  -4   8  -3   17.73    1.33
   4   8   3   15.47    0.92
   5  -8   3   19.66    0.72
  -5  -8  -3   21.79    1.12
   5   8  -3   21.90    1.57
   5  -8   3   20.69    0.95
  -5   8   3   18.52    1.46
   5   8   3   20.54    1.51
   5  -8  -3   20.42    1.03
   5   8   3   20.21    1.12
   5  -8  -3   20.52    1.12
  -5   8  -3   22.43    1.57
   6  -8   3   23.32    1.03
  -6  -8  -3   22.41    1.21
   6  -8   3   25.70    1.11
   6   8  -3   23.85    1.76
  -6   8   3   20.43    1.62
   6  -8  -3   23.33    1.21
   6   8   3   20.41    1.64
  -6   8  -3   20.14    1.67
   6  -8  -3   22.27    1.31
   7   8  -3   12.87    1.50
   7  -8   3   14.17    1.03
  -7   8   3   15.75    1.50
   7  -8   3   14.88    0.91
  -7  -8  -3   16.20    1.06
   7   8   3   15.12    1.55
   7  -8  -3   15.17    1.09
  -7   8  -3   17.62    1.64
  -8  -8  -3    2.50    0.66
  -8   8   3    3.85    0.99
   8  -8   3    2.64    0.58
   8   8  -3    4.69    1.15
   8   8   3    3.25    0.93
   8  -8  -3    2.83    0.69
  -8   8  -3    1.77    1.30
  -9   8   3    3.75    1.08
   9   8  -3    7.55    1.49
   9   8   3    4.57    1.30
  -9   8  -3    4.98    1.18
   9  -8  -3    3.88    0.93
 -10   8   3    1.32    1.18
  10   8  -3    2.07    1.02
  10   8   3    1.46    1.12
 -10   8  -3    0.01    1.13
   0  -9  -3  104.94    3.16
   0  -9  -3  108.34    3.45
   0   9  -3  104.83    3.28
   0   9   3  106.04    3.23
   0  -9  -3  102.51    3.40
   0  -9   3  104.47    3.18
   1  -9   3   71.13    2.59
  -1  -9  -3   75.76    2.58
  -1   9   3   78.66    2.86
  -1  -9  -3   79.24    2.66
   1   9  -3   80.74    2.51
  -1   9   3   80.55    2.44
  -1  -9  -3   73.27    2.60
   1   9  -3   75.12    2.52
  -1   9  -3   71.23    2.01
  -1   9  -3   72.46    2.58
   1  -9  -3   75.95    2.29
  -1  -9   3   69.72    2.25
   1   9   3   75.34    2.56
  -2   9   3    1.86    0.56
  -2  -9  -3    1.80    0.41
  -2  -9  -3    1.79    0.42
  -2   9   3    1.93    0.34
   2   9  -3    2.55    0.56
  -2  -9   3    1.34    0.27
  -2  -9   3    1.25    0.24
   2  -9  -3    1.25    0.25
  -2   9  -3    1.26    0.41
   2   9   3    1.15    0.44
  -3  -9  -3   55.32    2.12
  -3  -9  -3   60.30    2.12
  -3   9   3   56.24    2.46
   3   9  -3   56.98    2.37
   3   9   3   55.61    2.40
  -3  -9   3   58.85    1.68
   3  -9  -3   59.86    1.86
  -3   9  -3   58.24    2.47
  -3  -9   3   58.12    1.64
  -4   9   3   33.13    1.90
  -4  -9  -3   35.29    1.49
   4   9  -3   32.65    1.88
   4  -9  -3   32.28    1.27
  -4   9  -3   36.47    1.94
   4   9   3   34.31    1.86
   4   9   3   30.08    1.40
  -5   9   3   17.87    1.47
   5   9  -3   17.44    1.47
  -5  -9  -3   18.13    1.03
  -5   9  -3   19.35    1.51
   5   9   3   20.91    1.56
   5   9   3   16.23    1.06
   5  -9  -3   19.05    0.94
   5  -9  -3   19.42    1.03
   6   9  -3    2.70    0.83
  -6  -9  -3    4.02    0.61
  -6   9   3    3.65    0.99
   6  -9  -3    4.25    0.62
   6   9   3    3.77    0.91
  -6   9  -3    3.18    0.91
   6  -9  -3    3.32    0.73
   7  -9   3   20.64    1.14
  -7  -9  -3   20.51    1.17
   7   9  -3   20.84    1.78
  -7   9   3   23.05    1.83
   7  -9   3   18.01    0.86
  -7   9  -3   23.72    1.88
   7   9   3   20.05    1.78
   7  -9  -3   21.84    1.26
   8   9  -3    7.60    1.42
  -8   9   3    6.50    1.68
  -8  -9  -3    7.12    0.88
  -8   9  -3    7.13    1.37
   8   9   3    7.09    1.38
   8  -9  -3    7.20    0.99
   9   9  -3    4.94    1.30
  -9   9   3    5.23    1.22
   9   9   3    4.24    1.20
  -9   9  -3    6.06    1.44
   0 -10   3   48.58    1.86
   0 -10  -3   50.46    2.04
   0  10  -3   51.14    1.99
   0  10   3   49.43    1.89
   0 -10  -3   51.11    2.10
   0  10  -3   48.42    1.72
  -1  10   3   16.17    0.88
   1  10  -3   15.83    0.95
   1  10  -3   15.73    0.97
  -1 -10  -3   16.36    0.98
  -1  10   3   13.08    1.07
  -1 -10  -3   16.16    1.04
  -1 -10   3   13.48    0.80
   1 -10  -3   14.03    0.80
   1  10   3   13.33    0.92
  -1  10  -3   15.66    1.06
  -1  10  -3   15.26    0.64
  -2  10   3   11.13    1.03
   2  10  -3   12.72    0.93
  -2 -10  -3   12.49    0.89
  -2  10   3   12.19    0.72
  -2 -10  -3   11.63    0.87
  -2 -10   3   11.92    0.65
   2  10   3   10.78    0.93
  -2 -10   3   10.71    0.67
   2 -10  -3   11.69    0.66
  -2  10  -3   11.17    0.98
  -3 -10  -3   38.57    1.65
  -3 -10  -3   38.94    1.69
   3  10  -3   37.02    1.89
   3  10   3   38.24    1.92
  -3 -10   3   36.86    1.22
  -3 -10   3   38.51    1.27
   3 -10  -3   37.16    1.31
  -3  10  -3   39.88    2.08
  -4  10   3   27.96    1.80
   4  10  -3   27.93    1.74
  -4 -10  -3   29.52    1.40
  -4 -10  -3   29.16    1.43
   4  10   3   27.25    1.71
  -4  10  -3   27.55    1.75
   4 -10  -3   25.65    1.05
  -5 -10  -3    5.41    0.62
   5  10  -3    3.43    0.91
  -5 -10  -3    3.74    0.75
  -5  10   3    4.64    0.89
   5 -10  -3    5.13    0.54
   5  10   3    3.01    0.77
   5 -10  -3    4.47    0.50
  -5  10  -3    3.77    0.84
  -6  10   3    6.76    1.11
  -6 -10  -3    6.45    0.70
   6  10  -3    8.40    1.20
  -6  10  -3    5.12    1.01
   6 -10  -3    4.30    0.71
   6  10   3    5.64    1.04
   6 -10  -3    5.85    0.63
  -7  10   3    9.49    1.43
  -7 -10  -3    8.34    0.85
   7  10  -3    8.98    2.20
   7  10   3    6.84    1.78
   7 -10  -3    6.48    0.80
  -7  10  -3    7.69    1.34
   8  10  -3    4.64    1.32
  -8  10   3   10.96    1.54
  -8 -10  -3    8.74    0.96
   8 -10  -3    8.52    1.00
   8  10   3    9.75    1.53
  -8  10  -3   10.61    1.56
   9  10  -3   -0.27    0.80
  -9  10   3    1.96    1.11
  -9  10  -3    1.42    0.89
   9  10   3    1.68    0.98
   0 -11  -3  104.59    3.37
   0 -11  -3  112.67    3.75
   0  11  -3  114.30    3.29
   0  11  -3  114.61    3.64
   0  11   3  107.08    3.46
  -1  11   3   10.31    0.72
  -1  11   3   10.01    0.96
   1  11  -3    9.57    0.78
   1  11  -3   10.12    0.80
  -1 -11  -3    8.70    0.82
   1 -11  -3    9.60    0.68
  -1 -11   3    8.07    0.68
  -1  11  -3   10.88    0.95
  -1  11  -3    9.69    0.52
   1  11   3    9.26    0.81
   2  11  -3    2.89    0.58
  -2 -11  -3    2.88    0.53
  -2  11   3    2.55    0.61
   2  11   3    2.57    0.51
  -2 -11   3    2.05    0.41
  -2 -11   3    2.08    0.38
  -2  11  -3    2.56    0.64
   2 -11  -3    2.29    0.38
   3  11  -3   69.57    2.80
  -3 -11  -3   68.51    2.50
  -3  11   3   65.81    2.94
  -3 -11   3   70.56    2.09
   3 -11  -3   66.53    2.03
  -3  11  -3   65.79    2.83
  -3 -11   3   65.89    2.01
   4  11  -3   74.71    3.10
  -4 -11  -3   69.67    2.53
  -4  11   3   70.74    3.16
  -4  11  -3   72.90    3.12
   4 -11  -3   69.98    2.07
   4  11   3   68.38    3.01
  -5 -11  -3   12.24    0.92
   5  11  -3   11.26    1.31
  -5  11   3   11.56    1.31
   5  11   3    8.82    1.14
  -5  11  -3   12.68    1.29
   5 -11  -3   10.23    0.61
   5 -11  -3    9.72    0.61
  -6 -11  -3    5.31    0.64
  -6  11   3    3.91    1.12
   6  11  -3    5.77    1.24
   6  11   3    5.13    1.08
  -6  11  -3    4.02    1.00
   6 -11  -3    4.90    0.59
   7  11  -3    1.80    0.86
  -7 -11  -3    1.06    0.49
  -7  11   3    4.98    1.87
  -7  11  -3    1.62    0.84
   7 -11  -3    2.11    0.50
   7  11   3    1.96    0.91
  -8  11   3    4.73    1.29
   8  11  -3    6.57    1.39
   8  11   3    4.14    1.23
  -8  11  -3    4.64    1.18
  -9  11   3    5.77    1.60
   9  11  -3    3.79    1.36
  -9  11  -3    4.67    1.31
   9  11   3    4.35    1.42
   0 -12  -3   17.80    1.09
   0 -12  -3   19.57    1.33
   0  12   3   18.76    1.11
   0  12  -3   20.14    1.27
   0  12  -3   20.51    1.02
  -1  12   3   13.92    0.89
  -1 -12  -3   13.03    1.02
   1  12  -3   16.69    1.04
   1  12  -3   15.57    1.05
  -1  12   3   15.32    1.25
  -1 -12   3   13.95    0.90
   1 -12  -3   15.39    0.91
   1  12   3   15.66    1.08
  -1  12  -3   14.60    0.68
  -1  12  -3   14.58    1.12
  -2  12   3   22.66    1.04
   2  12  -3   21.45    1.35
  -2 -12  -3   21.28    1.28
  -2  12   3   19.15    1.44
  -2  12  -3   20.39    1.70
  -2 -12   3   21.68    1.11
   2 -12  -3   21.07    0.98
   2  12   3   20.30    1.35
  -2 -12   3   19.78    1.05
  -3  12   3   46.89    2.49
  -3 -12  -3   49.52    2.07
   3  12  -3   50.85    2.71
  -3 -12   3   50.17    1.72
  -3  12  -3   47.90    2.42
   3 -12  -3   50.89    1.59
  -3 -12   3   47.59    1.65
   3  12   3   50.34    2.38
  -4  12   3   36.59    2.21
  -4 -12  -3   40.81    1.78
   4  12  -3   35.22    2.07
  -4  12  -3   38.78    2.23
   4 -12  -3   36.41    1.18
   4  12   3   38.33    2.19
  -4 -12   3   36.11    1.15
  -4 -12   3   38.85    1.13
  -5  12   3   11.77    1.40
   5  12  -3   10.90    1.28
  -5 -12  -3   11.19    0.91
   5  12   3   13.79    1.42
   5 -12  -3   10.20    0.45
  -5  12  -3   10.17    1.23
  -6  12   3    3.76    1.10
   6  12  -3    4.77    1.08
  -6 -12  -3    4.01    0.66
   6  12   3    5.62    1.19
  -6  12  -3    4.33    1.04
  -7  12   3    2.42    0.99
   7  12  -3    1.90    0.96
  -7 -12  -3    1.32    0.53
   7  12   3    1.29    0.86
  -7  12  -3    1.45    0.90
  -8  12   3    3.63    1.15
   8  12  -3    2.59    1.16
  -8  12  -3    3.33    1.29
   8  12   3    4.31    1.15
  -9  12   3    3.14    1.43
   9  12  -3    3.80    1.13
  -9  12  -3    4.53    1.79
   9  12   3    3.96    1.30
   0  13   3    2.68    0.54
   0  13  -3    3.44    0.72
   0 -13  -3    2.02    0.59
   0  13  -3    2.94    0.52
  -1 -13  -3    0.03    0.34
   1  13  -3    0.42    0.31
   1  13  -3    0.96    0.42
  -1  13   3    0.04    0.34
  -1  13   3    0.65    0.33
  -1  13  -3    0.16    0.26
   1  13   3    1.31    0.42
  -1  13  -3    1.42    0.60
   1 -13  -3    0.70    0.37
   2  13  -3   71.52    2.76
  -2  13   3   63.95    3.00
  -2  13   3   70.29    2.30
  -2 -13  -3   69.23    2.71
   2 -13  -3   65.82    2.12
   2  13   3   68.79    2.77
  -2  13  -3   67.98    2.90
  -2 -13   3   61.76    2.24
  -2 -13   3   64.23    2.35
   3  13  -3   20.72    1.50
  -3 -13  -3   24.27    1.42
  -3  13   3   25.63    1.83
  -3 -13   3   23.73    1.10
   3  13   3   22.04    1.55
  -3 -13   3   20.14    1.01
  -3  13  -3   21.45    1.64
   3 -13  -3   22.29    0.89
  -4  13   3   39.24    2.41
  -4 -13  -3   43.22    1.91
   4  13  -3   41.16    2.30
   4  13   3   40.00    2.29
  -4  13  -3   45.87    2.48
  -4 -13   3   40.14    1.27
  -4 -13   3   38.66    1.24
   5  13  -3    9.20    1.19
  -5 -13  -3    8.29    0.82
  -5  13   3    8.82    1.27
  -5  13  -3    7.27    1.21
   5  13   3    9.61    1.27
   6  13  -3    1.52    0.80
  -6 -13  -3    1.90    0.59
  -6  13  -3    1.55    0.75
  -7 -13  -3    1.06    0.58
  -7  13   3    0.77    0.96
   7  13  -3    1.15    0.79
  -7  13  -3    0.19    0.79
   7  13   3    0.81    0.81
  -8  13   3   11.87    1.81
   8  13  -3    8.55    1.57
  -8  13  -3    5.28    1.43
   8  13   3    9.86    1.62
   0  14   3    1.61    0.43
   0  14  -3    1.15    0.39
   0  14  -3    2.30    0.65
   0 -14  -3    0.99    0.56
  -1 -14  -3   13.19    1.22
   1  14  -3   10.00    0.91
   1  14  -3   11.84    1.03
  -1  14   3   12.34    0.92
  -1  14   3   12.82    1.28
   1 -14  -3   13.86    0.92
  -1  14  -3   14.50    1.28
   1  14   3   13.54    1.11
  -1  14  -3   11.52    0.68
  -2  14   3   23.40    1.75
  -2 -14  -3   25.75    1.55
   2  14  -3   25.01    1.57
  -2  14   3   23.54    1.14
  -2 -14   3   24.10    1.37
   2  14   3   24.55    1.60
   2 -14  -3   25.62    1.12
  -2  14  -3   27.31    1.77
  -3 -14  -3   75.55    2.88
  -3  14   3   74.78    3.42
   3  14  -3   72.18    3.07
  -3 -14   3   75.15    2.49
  -3  14  -3   75.27    3.33
   3 -14  -3   72.63    2.08
   3  14   3   72.99    3.16
  -4 -14  -3    7.27    0.88
  -4  14   3    5.47    1.09
   4  14  -3    5.43    1.06
  -4  14  -3    3.39    0.85
   4  14   3    5.71    1.05
  -4 -14   3    3.89    0.49
  -5 -14  -3   46.39    2.00
  -5  14   3   43.81    2.75
   5  14  -3   46.07    2.67
  -5  14  -3   46.83    2.77
   5  14   3   47.25    2.75
   6  14  -3    1.26    0.80
  -6 -14  -3    0.82    0.51
  -6  14   3   -0.54    0.85
   6  14   3    1.46    0.85
  -6  14  -3    0.77    0.77
  -7  14   3    1.47    1.21
   7  14  -3    2.82    1.14
  -7  14  -3    4.14    1.19
   7  14   3    4.77    1.38
   8  14  -3    0.06    1.05
  -8  14   3    0.53    1.12
  -8  14  -3    1.13    0.96
   8  14   3    1.42    0.96
   0 -15  -3    1.04    0.52
   0  15  -3    0.95    0.44
   0  15   3    0.94    0.45
   0  15  -3   -0.11    0.38
   1  15  -3    3.75    0.79
   1  15  -3    2.70    0.62
  -1  15   3    2.47    0.90
  -1  15   3    2.51    0.56
  -1 -15  -3    3.01    0.75
  -1  15  -3    1.73    0.74
   1  15   3    2.81    0.70
  -1  15  -3    2.83    0.44
   1 -15  -3    0.81    0.50
   1 -15  -3    2.84    0.76
  -2  15   3   33.92    1.42
  -2 -15  -3   37.12    2.28
   2  15  -3   32.95    2.16
  -2  15   3   32.89    2.18
   2  15   3   35.55    1.98
   2 -15  -3   32.81    1.37
  -2 -15   3   34.66    1.74
  -2  15  -3   36.54    2.13
  -3  15   3    2.19    0.83
   3  15  -3    1.35    0.61
  -3 -15  -3    4.37    0.82
  -3 -15   3    1.70    0.54
   3  15   3    1.82    0.61
  -3  15  -3    1.72    0.65
  -3 -15   3    1.43    0.58
  -4  15   3    6.72    1.27
  -4 -15  -3    6.53    0.88
   4  15  -3    5.57    1.12
  -4  15  -3    6.71    1.16
   4  15   3    7.45    1.11
   5  15  -3   14.50    1.60
  -5 -15  -3   16.41    1.22
  -5  15   3   17.83    1.87
  -5  15  -3   15.81    1.73
   5  15   3   13.04    1.55
  -6 -15  -3   10.20    1.07
   6  15  -3   10.42    1.57
  -6  15   3   10.91    1.73
   6  15   3   10.67    1.64
  -6  15  -3   12.54    1.68
  -7  15   3    0.33    1.16
   7  15  -3    0.19    0.79
   7  15   3    2.34    1.00
  -7  15  -3    0.69    0.95
   8  15  -3   -0.31    1.00
  -8  15   3   -1.08    1.27
   8  15   3   -0.63    0.92
  -8  15  -3    0.35    1.06
   0  16   3    2.86    0.68
   0  16  -3    2.02    0.72
   0 -16  -3    1.50    0.65
   0  16  -3    1.30    0.42
   1  16  -3   11.10    1.10
  -1 -16  -3   13.32    1.23
  -1  16   3   10.50    0.93
  -1  16  -3   10.68    0.65
  -1  16  -3    9.59    0.67
  -1 -16   3    9.19    1.06
  -1  16  -3    9.68    1.28
   1 -16  -3   10.81    1.27
   1 -16  -3    9.76    0.96
  -2 -16  -3   27.19    1.74
  -2  16   3   24.67    1.19
  -2  16   3   26.24    1.99
   2  16  -3   26.70    1.61
   2 -16  -3   24.81    1.14
  -2 -16   3   24.25    1.52
   2  16   3   23.70    1.69
  -2  16  -3   27.67    1.93
  -3 -16  -3    2.60    0.71
   3  16  -3    3.33    0.81
  -3  16   3    1.44    0.71
  -3  16  -3    1.95    0.77
  -3 -16   3    2.56    0.55
   3  16   3    3.27    0.77
   4  16  -3   10.49    1.32
  -4 -16  -3   11.97    1.15
   4  16   3   11.98    1.46
  -4  16  -3   12.89    1.58
   5  16  -3   23.26    3.01
  -5  16   3   25.13    2.12
  -5 -16  -3   22.55    1.46
   5  16   3   24.35    1.98
  -5  16  -3   23.69    2.14
   6  16  -3   17.39    1.94
  -6 -16  -3   15.59    1.54
  -6  16   3   16.00    1.93
   6  16   3   15.13    1.72
  -6  16  -3   14.64    1.93
   7  16  -3    0.76    0.99
  -7  16   3    2.30    1.14
  -7  16  -3   -0.53    0.90
   7  16   3   -1.24    0.81
   0 -17  -3    0.62    0.63
   0  17  -3    0.43    0.46
   0  17   3    0.17    0.47
   0  17  -3    0.72    0.58
  -1  17   3   28.63    1.47
   1  17  -3   23.67    1.49
  -1 -17  -3   29.43    1.89
  -1 -17   3   29.93    1.80
  -1  17  -3   26.39    1.07
  -1  17  -3   25.22    1.09
   1 -17  -3   28.65    2.02
  -1  17  -3   28.02    1.97
   1  17   3   28.90    1.77
  -2  17   3   21.71    1.86
  -2  17   3   21.80    1.10
   2  17  -3   20.50    1.54
  -2 -17  -3   23.41    1.67
  -2  17  -3   23.11    1.95
  -2 -17   3   22.81    1.47
   2  17   3   23.59    1.69
  -3 -17  -3    4.83    1.00
  -3  17   3    2.47    1.11
   3  17  -3    2.21    0.71
  -3 -17   3    3.97    0.85
  -3  17  -3    3.50    0.91
   3  17   3    2.15    0.79
   4  17  -3    1.29    0.73
  -4 -17  -3    3.37    0.75
  -4  17   3    3.71    1.16
   4  17   3    2.75    0.90
  -4 -17   3    1.70    0.48
  -4  17  -3    2.09    0.98
   5  17  -3    9.59    1.48
  -5 -17  -3    8.40    1.18
  -5  17   3    9.17    1.76
  -5  17  -3    8.25    1.51
   5  17   3    9.90    1.56
  -6  17   3   18.02    2.17
   6  17  -3   15.22    1.78
  -6  17  -3   15.09    2.06
   6  17   3   16.91    1.86
   7  17  -3    3.61    1.27
  -7  17   3    3.94    1.63
  -7  17  -3    2.18    1.06
   7  17   3    5.92    2.01
   0  18  -3   18.17    1.61
   0  18  -3   17.54    1.20
   0 -18  -3   14.41    1.52
   0  18   3   19.38    1.36
  -1  18   3   14.21    1.15
   1  18  -3   12.84    1.16
  -1 -18  -3   12.01    1.37
  -1  18  -3   15.45    1.59
  -1  18  -3   12.34    0.70
   1  18   3   11.79    1.28
  -1 -18   3   14.49    1.37
   1 -18  -3   13.57    1.61
   2  18  -3   13.31    1.35
  -2 -18  -3   12.23    1.43
  -2  18   3   14.01    1.68
  -2  18  -3   12.48    1.54
   2  18   3    9.61    1.35
  -2 -18   3   12.51    1.23
   2 -18  -3   15.23    1.74
  -3  18   3    2.06    0.86
   3  18  -3    2.42    0.86
  -3 -18  -3    3.37    0.82
  -3 -18   3    1.07    0.64
   3  18   3    0.67    0.76
  -3  18  -3    1.53    0.81
  -4 -18  -3    6.42    1.13
   4  18  -3    7.22    1.25
  -4  18   3    6.15    1.57
  -4  18  -3    8.01    1.37
   4  18   3    4.57    1.13
  -5  18   3    5.15    1.41
  -5 -18  -3    4.78    1.06
   5  18  -3    3.58    1.15
   5  18   3    5.57    1.27
  -5  18  -3    3.97    1.46
  -6  18   3   15.27    2.22
   6  18  -3   12.75    1.80
  -6  18  -3   14.09    2.06
   6  18   3   14.27    1.88
   0 -19  -3    4.54    1.17
   0  19   3    5.42    1.11
   0  19  -3    4.44    0.86
   0  19  -3    5.49    1.16
  -1 -19  -3   25.72    1.93
   1  19  -3   24.25    1.62
  -1  19   3   24.39    1.51
   1 -19  -3   28.00    2.25
   1  19   3   27.21    1.81
  -1 -19   3   27.86    1.93
  -1  19  -3   29.25    2.14
  -2 -19  -3   12.30    1.47
   2  19  -3    8.61    1.23
   2 -19  -3   12.55    1.66
  -2 -19   3   11.93    1.33
   2  19   3   11.65    1.45
  -2  19  -3   13.74    2.10
  -3  19   3    2.69    1.05
   3  19  -3    1.62    0.87
  -3 -19  -3    2.88    0.82
  -3  19  -3    3.75    1.12
  -3 -19   3    1.06    0.81
   3  19   3    2.30    0.91
  -4  19   3    1.97    1.05
  -4 -19  -3    2.34    0.95
   4  19  -3    2.97    0.98
  -4  19  -3    2.61    1.06
   4  19   3    2.03    0.85
  -5  19   3   11.56    2.01
   5  19  -3   11.38    1.69
   5  19   3   14.15    1.99
  -5  19  -3   15.47    2.13
  -6  19   3    2.94    1.39
   6  19  -3    4.31    1.36
  -6  19  -3    9.84    2.02
   0  20   3   34.53    1.94
   0 -20   3   38.11    2.36
   0 -20  -3   38.49    3.78
   0  20  -3   30.24    1.71
   1  20  -3    3.70    0.87
  -1 -20  -3    4.47    1.07
  -1  20   3    4.08    0.93
  -1 -20   3    4.05    1.11
   1 -20  -3    4.26    1.19
   1  20   3    2.14    0.93
  -2 -20  -3    4.94    1.18
   2  20  -3    5.10    1.09
  -2  20  -3    8.05    1.60
   2  20   3    6.24    1.17
   2 -20  -3    6.25    1.44
  -2 -20   3    6.35    1.14
   3  20  -3    7.05    1.35
  -3 -20  -3    8.94    1.49
   3  20   3    6.98    1.54
  -3  20  -3    5.21    1.47
   3 -20  -3   10.31    1.76
  -4  20   3    0.82    1.12
  -4 -20  -3    0.16    1.08
   4  20  -3    1.25    1.04
   4  20   3    2.84    1.12
  -4  20  -3    1.06    1.13
  -5  20   3    3.95    1.66
   5  20  -3    5.05    1.22
   5  20   3    3.31    1.33
   0 -21  -3   14.15    1.80
   0  21   3   11.44    1.56
   0 -21   3   11.47    1.67
   1  21  -3    4.09    1.11
  -1 -21  -3    3.07    1.13
  -1  21  -3    4.55    1.40
   1  21   3    5.83    1.13
  -1 -21   3    4.80    1.12
   1 -21  -3    4.92    1.39
  -2 -21  -3    1.63    1.04
   2  21  -3    2.21    0.97
  -2 -21   3    0.67    1.00
  -2  21  -3   -0.32    0.95
   2 -21  -3    1.35    1.11
   2  21   3    2.01    1.09
   3  21  -3    5.05    1.35
  -3 -21  -3    3.28    1.14
   3 -21  -3    2.27    1.08
  -3  21  -3    9.10    1.81
   3  21   3    3.74    1.23
  -4  21   3    6.39    2.64
   4  21  -3    6.77    1.42
   4  21   3   10.44    1.87
   4 -21  -3   13.46    2.78
  -4  21  -3   11.74    2.10
   0 -22   3    3.64    1.17
   0 -22  -3    2.77    1.12
   1 -22   3    1.06    1.13
  -1 -22  -3    4.09    1.26
   1  22   3    4.14    1.34
  -1 -22   3    3.59    1.24
   1 -22  -3    4.04    1.28
   2  22  -3    2.31    1.28
  -2 -22  -3    1.92    1.31
  -2 -22   3    0.54    1.39
  -2  22  -3    3.17    1.28
   2 -22  -3    1.85    1.15
   2  22   3    1.81    1.98
   3  22  -3   16.80    2.07
  -3 -22  -3   14.04    2.93
   3  22   3   12.68    1.97
  -3  22  -3   11.69    2.19
   3 -22  -3   18.97    3.04
   0 -23   3    0.87    1.23
   0 -23  -3   -1.15    1.11
   1 -23   3    7.65    1.55
  -1 -23   3    5.85    1.62
   1 -23  -3    6.02    1.65
   0   0  -4   12.16    0.58
   0   0  -4   12.26    0.54
   0   0   4   11.99    0.53
  -1   0  -4  375.86    9.36
   1   0  -4  382.26    9.25
   1   0   4  366.03    9.36
   1   0   4  387.20    9.38
  -1   0   4  383.54    9.26
   1   0  -4  379.72    9.47
  -1   0   4  372.77    9.47
  -1   0  -4  374.85    9.37
  -2   0  -4    7.79    0.51
  -2   0   4    9.05    0.47
   2   0   4    8.07    0.52
  -2   0  -4    9.16    0.56
   2   0   4    9.36    0.55
   2   0  -4    7.95    0.58
   2   0  -4    8.49    0.44
   3   0  -4   31.94    1.13
  -3   0  -4   29.79    1.25
   3   0   4   29.60    1.25
  -3   0  -4   33.23    1.31
  -3   0   4   32.08    1.16
   3   0   4   30.19    1.28
  -4   0   4   15.36    0.81
   4   0   4   15.43    0.91
  -4   0  -4   14.72    0.93
  -4   0  -4   15.52    0.92
   4   0  -4   14.09    0.76
   4   0   4   14.34    0.93
   5   0  -4   88.52    2.86
   5   0   4   96.56    3.20
  -5   0  -4   96.11    3.17
  -5   0   4   89.27    2.87
   5   0  -4   91.44    3.22
  -6   0  -4    0.43    0.39
   6   0  -4   -0.25    0.33
   6   0  -4    0.83    0.58
   6   0   4    0.52    0.43
  -6   0   4    0.65    0.34
   7   0   4  106.86    3.91
   7   0  -4  111.95    4.07
  -7   0  -4  109.08    3.85
  -7   0   4  103.83    3.55
   8   0   4    2.11    0.72
  -8   0   4    1.64    0.59
  -8   0  -4    1.46    0.64
   8   0  -4    1.99    0.69
   9   0   4   -0.65    0.59
  -9   0   4    0.98    0.68
  -9   0  -4    0.16    0.59
   9   0  -4   -0.34    0.57
  10   0  -4    1.95    0.92
  10   0   4    2.03    0.91
 -10   0   4    2.72    1.06
 -10   0  -4    2.75    1.46
   0  -1   4  376.76    9.28
   0  -1  -4  390.99    9.37
   0  -1   4  380.54    9.38
   0   1   4  381.01    9.42
   0   1   4  376.96    9.35
   0   1  -4  369.37    9.35
   0   1  -4  377.40    9.27
   0  -1  -4  376.91    9.39
   1  -1   4  136.21    3.59
   1   1  -4  136.38    3.75
  -1   1   4  138.15    3.73
   1   1  -4  140.41    3.46
   1  -1   4  133.27    3.63
  -1  -1  -4  133.82    3.65
  -1  -1  -4  134.38    3.66
   1   1   4  135.20    3.68
  -1   1  -4  138.32    3.63
   1  -1  -4  137.91    3.67
   1  -1  -4  140.90    3.76
  -1   1  -4  136.69    3.68
   1  -1  -4  138.57    3.64
   1   1   4  141.81    3.75
  -1  -1   4  136.89    3.50
  -2  -1  -4   77.14    2.31
  -2   1   4   76.92    2.24
   2   1  -4   75.22    2.02
   2  -1   4   72.80    2.28
   2   1  -4   73.00    2.01
   2  -1   4   73.99    2.20
  -2  -1  -4   76.40    2.31
   2  -1  -4   76.81    2.38
   2   1   4   72.98    2.24
   2  -1  -4   74.59    2.18
  -2   1  -4   74.86    2.29
  -2   1  -4   74.05    2.18
   2   1   4   74.75    2.31
  -3  -1  -4   12.92    0.76
   3  -1   4   13.86    0.92
  -3  -1  -4   11.83    0.76
   3  -1   4   15.49    0.80
   3   1  -4   13.12    0.58
  -3   1  -4   14.92    0.84
   3   1   4   13.19    0.76
   3  -1  -4   14.06    0.72
  -3   1  -4   16.23    0.79
   3   1   4   12.60    0.80
  -3  -1   4   14.09    0.63
   4  -1   4   42.96    1.75
   4  -1   4   47.76    1.76
   4   1  -4   45.41    1.87
   4   1  -4   44.39    1.48
  -4  -1  -4   47.33    1.78
  -4   1   4   43.80    1.66
  -4  -1  -4   42.85    1.75
  -4   1  -4   47.71    1.84
   4  -1  -4   42.70    1.60
   4   1   4   43.91    1.72
   4   1   4   45.48    1.84
  -4  -1   4   43.89    1.51
  -4   1  -4   44.63    1.70
  -5   1   4    2.45    0.43
   5   1  -4    2.06    0.37
  -5  -1  -4    2.52    0.48
   5  -1   4    3.17    0.55
   5   1  -4    3.07    0.63
   5  -1  -4    2.23    0.51
   5  -1  -4    2.08    0.41
  -5   1  -4    3.09    0.54
   5   1   4    2.67    0.62
  -5  -1   4    3.20    0.39
  -6  -1  -4   28.90    1.56
   6   1  -4   29.95    1.73
   6   1  -4   28.25    1.27
   6  -1   4   29.82    1.59
  -6   1   4   27.91    1.42
   6   1   4   28.22    1.63
  -6   1  -4   26.88    1.56
   6  -1  -4   27.31    1.58
  -6  -1   4   25.95    1.26
   7   1  -4   14.99    1.41
   7  -1   4   15.81    1.27
  -7  -1  -4   15.16    1.30
  -7   1   4   13.12    1.11
  -7  -1   4   12.74    1.00
   7  -1  -4   14.38    1.30
   7   1   4   15.47    1.33
  -7   1  -4   15.46    1.27
   8   1  -4   16.55    1.56
   8  -1   4   17.95    1.50
  -8  -1  -4   18.60    1.45
   8  -1  -4   20.05    1.56
   8   1   4   19.09    1.58
  -8  -1   4   18.39    1.23
  -8   1  -4   17.74    1.45
   9  -1   4    0.44    0.71
  -9  -1  -4    0.20    0.67
  -9   1   4    0.80    0.68
   9   1  -4   -0.39    0.91
   9   1   4    0.56    0.67
  -9   1  -4    1.23    0.65
  -9  -1   4    0.21    0.59
   9  -1  -4    1.40    0.68
 -10   1   4    2.57    1.05
  10   1  -4    6.84    1.46
 -10  -1  -4    2.42    1.01
  10  -1   4    2.79    0.99
 -10   1  -4    2.68    1.16
  10   1   4    5.95    1.42
  10  -1  -4    4.38    1.19
   0   2  -4   58.02    1.74
   0  -2   4   58.56    1.75
   0   2   4   57.35    1.79
   0   2   4   58.24    1.77
   0  -2   4   58.09    1.67
   0  -2  -4   58.02    1.77
   0   2  -4   59.66    1.67
   1  -2   4  144.94    3.67
  -1   2   4  143.73    3.85
   1  -2   4  135.47    3.76
  -1  -2  -4  139.22    3.82
   1   2  -4  139.73    3.51
   1  -2  -4  135.68    3.70
  -1   2  -4  135.63    3.66
   1  -2  -4  134.11    3.66
   1  -2  -4  135.86    3.70
  -1   2  -4  138.61    3.54
   1   2   4  133.32    3.72
  -1  -2   4  139.82    3.43
   1   2   4  137.27    3.68
   2  -2   4    9.18    0.60
  -2   2   4    8.51    0.58
   2   2  -4    9.05    0.34
  -2  -2  -4    9.75    0.59
  -2  -2  -4    9.40    0.60
   2   2  -4    9.61    0.35
   2  -2   4    9.92    0.51
   2   2   4    8.05    0.57
   2  -2  -4    8.00    0.52
  -2   2  -4    7.03    0.52
   2  -2  -4    7.18    0.53
   2   2   4    8.15    0.51
  -2   2  -4    7.61    0.44
  -3  -2  -4   64.55    2.11
  -3  -2  -4   62.58    2.18
   3   2  -4   65.39    1.75
   3  -2   4   60.96    2.16
  -3   2   4   64.54    2.13
   3   2   4   65.17    2.21
   3   2   4   59.58    2.02
  -3   2  -4   57.82    1.92
   3  -2  -4   59.46    2.00
  -3  -2   4   62.94    1.73
  -3   2  -4   61.66    2.15
   3  -2  -4   64.22    2.18
  -4  -2  -4   23.81    1.13
   4   2  -4   20.53    0.81
   4   2  -4   23.14    1.26
   4  -2   4   22.65    1.09
  -4   2   4   21.18    1.09
  -4   2  -4   20.93    1.01
   4  -2  -4   21.95    1.07
  -4  -2   4   21.58    0.85
  -4   2  -4   22.35    1.19
   4   2   4   18.34    1.01
   4   2   4   21.39    1.21
   5   2  -4   24.12    1.02
   5  -2   4   25.97    1.30
   5   2  -4   27.37    1.54
  -5  -2  -4   27.87    1.35
  -5   2   4   24.49    1.30
   5   2   4   22.69    1.36
  -5   2  -4   21.31    1.13
   5  -2  -4   22.64    1.27
   5  -2  -4   21.69    1.14
  -5   2  -4   21.72    1.30
   6   2  -4   27.45    1.22
  -6   2   4   30.59    1.55
   6   2  -4   29.46    1.76
  -6  -2  -4   32.74    1.61
   6  -2   4   32.05    1.61
  -6   2  -4   32.91    1.72
   6  -2  -4   31.80    1.69
   6   2   4   28.16    1.68
  -6  -2   4   28.15    1.26
  -7   2   4   34.53    1.81
   7   2  -4   34.91    2.08
   7   2  -4   34.72    1.52
  -7  -2  -4   38.21    1.88
   7   2   4   31.90    1.97
  -7   2  -4   36.19    2.01
  -7  -2   4   36.14    1.54
   7  -2  -4   36.90    1.99
   8   2  -4   11.17    1.39
  -8  -2  -4   12.14    1.17
   8  -2   4   11.27    1.20
  -8   2   4   11.65    1.21
  -8  -2   4   10.74    0.91
   8  -2  -4   11.18    1.22
  -8   2  -4   11.75    1.26
   8   2   4   10.37    1.27
  -9   2   4    4.50    0.99
   9  -2   4    3.34    0.93
   9   2  -4    2.70    0.95
  -9  -2  -4    5.56    1.10
   9  -2  -4    4.35    1.07
  -9  -2   4    4.77    1.00
   9   2   4    6.90    2.12
  -9   2  -4    4.29    1.01
  10  -2   4    0.44    0.89
 -10  -2  -4   -0.77    0.83
  10   2  -4    0.47    0.80
 -10   2   4    0.06    0.95
  10   2   4    1.11    0.89
 -10   2  -4    2.26    0.88
  10  -2  -4    0.65    0.87
   0   3  -4   11.27    0.52
   0   3   4   11.91    0.62
   0  -3  -4   12.30    0.63
   0   3   4   11.07    0.61
   0  -3   4   11.49    0.53
   0  -3  -4   11.35    0.61
   0   3  -4   11.82    0.57
   1  -3   4  666.84   16.59
  -1   3   4  684.88   16.63
  -1  -3  -4  689.78   16.64
   1  -3   4  677.40   16.40
  -1  -3  -4  663.25   16.66
   1   3  -4  686.42   16.28
  -1   3   4  684.23   16.76
  -1   3  -4  647.65   15.91
   1  -3  -4  638.73   16.16
   1   3   4  649.52   15.90
   1  -3  -4  644.59   15.89
  -1  -3   4  672.60   15.60
  -1   3  -4  653.47   15.69
   1  -3  -4  639.51   15.97
   2  -3   4   47.67    1.74
  -2  -3  -4   50.24    1.78
   2  -3   4   51.52    1.53
  -2  -3  -4   52.85    1.74
  -2   3   4   52.78    1.77
  -2   3   4   51.57    1.80
   2   3   4   53.05    1.74
   2  -3  -4   53.77    1.80
  -2   3  -4   49.40    1.80
   2   3   4   52.99    1.87
   2  -3  -4   54.61    1.78
  -2   3  -4   51.78    1.54
  -3   3   4   32.66    1.38
   3   3  -4   31.33    0.83
   3  -3   4   31.76    1.15
   3   3  -4   31.31    0.84
  -3  -3  -4   30.42    1.25
   3  -3   4   31.37    1.37
  -3  -3  -4   28.19    1.33
  -3   3  -4   30.75    1.10
   3  -3  -4   29.50    1.25
   3  -3  -4   27.78    1.26
   3   3   4   30.89    1.39
   3   3   4   27.51    1.18
  -3   3  -4   30.53    1.36
   4   3  -4    4.85    0.30
   4   3  -4    6.97    0.70
  -4  -3  -4    6.15    0.55
   4  -3   4    5.01    0.52
  -4   3   4    5.40    0.57
  -4   3  -4    5.43    0.48
  -4  -3   4    6.11    0.36
   4   3   4    7.34    0.72
   4   3   4    4.95    0.51
   4  -3  -4    5.27    0.59
   4  -3  -4    5.83    0.60
  -4   3  -4    6.57    0.69
   5  -3   4   64.12    2.28
  -5   3   4   62.57    2.41
  -5  -3  -4   64.03    2.32
   5   3  -4   66.35    2.66
   5   3  -4   61.44    1.88
   5   3   4   61.79    2.57
   5  -3  -4   64.76    2.38
  -5  -3   4   64.73    1.94
  -5   3  -4   65.28    2.56
  -6   3   4   55.18    2.36
   6   3  -4   55.63    1.85
   6  -3   4   54.19    2.23
  -6  -3  -4   58.98    2.29
   6   3  -4   58.07    2.62
   6   3   4   56.24    2.55
  -6  -3   4   59.40    1.99
   6  -3  -4   55.35    2.38
  -6   3  -4   56.50    2.50
   7   3  -4    7.58    0.71
  -7  -3  -4    6.74    0.86
   7   3  -4    8.24    1.16
   7  -3   4    6.83    0.91
  -7   3   4    7.37    1.43
  -7   3  -4    6.21    0.98
  -7  -3   4    5.55    0.59
   7   3   4    6.22    0.95
   7  -3  -4    5.83    0.92
  -8  -3  -4    6.09    0.95
   8   3  -4    4.93    1.05
  -8   3   4    6.29    1.04
   8  -3   4    5.24    0.97
  -8  -3   4    5.50    0.69
   8  -3  -4    6.66    1.04
  -8   3  -4    4.58    1.03
   8   3   4    4.81    1.08
   9   3  -4    9.35    1.44
  -9   3   4   10.88    1.35
  -9  -3  -4    9.77    1.21
   9  -3   4    7.85    1.17
  -9   3  -4    8.63    1.35
  -9  -3   4    6.98    1.01
   9   3   4    7.83    1.30
   9  -3  -4    9.38    1.32
 -10  -3  -4    2.26    0.99
  10  -3   4    1.60    1.16
 -10   3   4    1.79    1.02
  10   3  -4    1.67    1.05
 -10   3  -4    2.26    1.14
  10  -3  -4    1.60    0.92
  10   3   4    2.29    0.97
   0  -4   4   17.29    0.71
   0  -4  -4   16.28    0.84
   0   4  -4   18.11    0.73
   0   4  -4   17.40    0.75
   0  -4  -4   16.90    0.83
   0  -4  -4   16.77    0.79
   0   4   4   17.38    0.81
  -1   4   4   96.29    2.90
  -1   4   4   96.90    2.76
   1  -4   4   94.32    2.51
  -1  -4  -4   95.99    2.79
   1   4  -4   92.86    2.45
   1  -4   4   89.78    2.73
   1   4   4   99.99    2.90
  -1   4  -4   97.80    2.83
   1  -4  -4   95.40    2.89
  -1  -4   4   96.21    2.51
   1  -4  -4   95.93    2.76
   1   4   4   95.81    2.82
  -1   4  -4   96.19    2.55
  -2   4   4  257.14    6.94
   2  -4   4  261.64    6.45
   2  -4   4  255.59    6.86
  -2  -4  -4  258.67    6.91
  -2  -4  -4  269.29    6.81
   2   4   4  259.69    6.90
  -2   4  -4  270.97    6.58
   2  -4  -4  260.40    6.88
   2  -4  -4  259.94    7.01
   2   4   4  278.80    7.14
  -2   4  -4  270.11    7.06
   3  -4   4   29.90    1.05
  -3  -4  -4   30.88    1.38
   3  -4   4   26.26    1.28
  -3  -4  -4   28.46    1.23
   3   4  -4   29.15    1.38
  -3   4   4   29.48    1.37
   3   4   4   25.92    1.13
  -3   4  -4   27.67    1.32
  -3   4  -4   25.81    0.95
   3   4   4   29.06    1.36
   3  -4  -4   25.89    1.18
   3  -4  -4   24.55    1.21
   4  -4   4   11.91    0.70
  -4  -4  -4   12.32    0.80
   4   4  -4   13.93    1.01
  -4   4   4   13.49    0.96
  -4   4  -4   13.97    0.72
   4  -4  -4   14.96    0.94
   4   4   4   14.64    1.04
  -4   4  -4   12.82    0.94
   4   4   4   13.72    0.82
  -5   4   4   22.94    1.37
   5   4  -4   22.37    0.79
   5   4  -4   22.26    1.47
  -5  -4  -4   25.51    1.25
   5  -4   4   23.79    1.17
  -5  -4   4   23.63    0.82
   5   4   4   25.46    1.53
   5   4   4   23.64    1.35
  -5   4  -4   23.44    1.42
   6   4  -4   58.40    2.66
   6  -4   4   59.93    2.21
  -6   4   4   52.33    2.36
  -6  -4  -4   53.50    2.18
   6   4  -4   54.05    1.70
  -6  -4   4   55.78    1.75
   6  -4  -4   56.05    2.35
  -6   4  -4   61.44    2.63
   6   4   4   56.84    2.62
   7  -4   4    3.01    0.67
   7   4  -4    4.96    0.94
  -7  -4  -4    4.79    0.75
   7   4  -4    4.31    0.53
  -7   4   4    3.70    0.87
   7  -4  -4    3.98    0.77
  -7   4  -4    3.17    0.77
   7   4   4    4.07    0.86
  -7  -4   4    4.20    0.71
   8  -4   4    7.65    1.03
  -8  -4  -4    8.67    1.00
   8   4  -4    5.62    1.11
  -8   4   4    8.43    1.14
   8  -4  -4    9.22    1.07
   8   4   4    9.82    1.31
  -8   4  -4    9.03    1.20
  -9  -4  -4    5.39    1.16
   9   4  -4    3.51    1.10
   9  -4   4    4.53    0.99
  -9   4   4    3.96    0.98
   9   4   4    3.59    1.20
   9  -4  -4    4.43    0.97
  -9   4  -4    5.60    1.37
  10  -4   4    6.51    1.25
  10   4  -4    8.23    1.64
 -10  -4  -4    7.94    1.56
 -10   4   4    6.86    2.30
 -10   4  -4    7.47    1.50
  10   4   4    5.46    1.23
  10  -4  -4   10.14    1.47
   0  -5  -4   73.62    2.22
   0  -5   4   70.27    2.10
   0   5  -4   70.96    2.12
   0  -5  -4   68.30    2.29
   1  -5   4  146.65    4.07
   1   5  -4  145.08    3.77
  -1   5   4  144.67    4.04
  -1  -5  -4  147.95    4.12
  -1   5   4  144.21    4.24
  -1  -5  -4  152.33    4.12
  -1   5  -4  160.27    4.30
   1   5   4  150.20    4.26
  -1   5  -4  150.80    3.92
   1  -5  -4  152.17    4.36
   1   5   4  160.16    4.35
  -1  -5   4  153.08    3.94
   1  -5  -4  155.74    4.18
   2  -5   4   44.84    1.24
  -2   5   4   44.69    1.78
  -2  -5  -4   46.63    1.64
   2  -5   4   42.63    1.67
  -2  -5  -4   40.82    1.67
  -2   5   4   45.60    1.61
   2   5  -4   44.11    1.70
  -2   5  -4   44.54    1.73
   2   5   4   44.48    1.77
   2  -5  -4   44.12    1.55
   2   5   4   44.31    1.61
  -2   5  -4   45.02    1.23
   2  -5  -4   46.02    1.73
   3   5  -4  179.32    5.15
  -3   5   4  175.39    5.13
   3  -5   4  175.76    4.49
  -3  -5  -4  173.57    4.86
   3  -5  -4  166.78    4.91
  -3   5  -4  169.69    4.35
   3   5   4  178.07    5.08
   3   5   4  172.69    4.75
  -3   5  -4  171.83    5.01
   3  -5  -4  169.89    4.74
   4   5  -4    2.61    0.53
  -4  -5  -4    2.27    0.42
   4  -5   4    2.58    0.33
  -4   5   4    3.20    0.52
   4   5   4    2.62    0.63
  -4   5  -4    3.03    0.56
   4   5   4    2.53    0.42
   5  -5   4   62.91    2.15
  -5   5   4   60.19    2.55
  -5  -5  -4   63.39    2.30
   5   5  -4   66.89    2.82
   5  -5  -4   59.45    2.32
  -5   5  -4   63.29    2.58
   5   5   4   54.92    2.14
   6  -5   4   15.62    1.00
   6   5  -4   14.66    1.32
  -6  -5  -4   15.81    1.08
  -6   5   4   13.19    1.41
   6   5   4   17.54    1.40
  -6   5  -4   14.71    1.28
   6  -5  -4   15.45    1.10
   7   5  -4    4.23    1.04
  -7  -5  -4    4.29    0.71
  -7   5   4    3.49    0.82
   7   5  -4    2.75    0.38
   7  -5   4    3.94    0.70
   7   5   4    3.10    0.89
  -7   5  -4    3.00    0.90
   7  -5  -4    2.01    1.02
  -8   5   4    0.92    0.61
  -8  -5  -4    0.85    0.55
   8   5  -4    1.35    0.81
   8  -5  -4    2.38    0.69
  -8   5  -4    0.54    0.66
   8   5   4    0.64    0.68
   9   5  -4   43.53    2.80
  -9  -5  -4   46.45    2.26
  -9   5   4   41.41    2.54
   9  -5   4   41.30    2.23
   9  -5  -4   41.67    2.36
  -9   5  -4   44.54    2.75
   9   5   4   40.52    2.67
 -10  -5  -4    1.59    1.32
  10   5  -4   -0.30    0.85
 -10   5   4    0.59    1.03
  10  -5   4    1.70    0.88
 -10   5  -4    2.69    1.07
  10   5   4    0.51    0.86
  10  -5  -4    0.20    0.95
   0  -6  -4   19.64    1.01
   0  -6   4   18.33    0.84
   0  -6  -4   20.02    0.93
   0   6  -4   20.22    1.03
   0  -6  -4   21.50    1.04
   0   6   4   20.94    0.98
  -1   6   4   15.57    0.82
   1  -6   4   13.32    0.78
   1   6  -4   13.71    0.63
  -1   6   4   14.50    0.90
   1   6  -4   15.36    0.81
  -1  -6  -4   13.66    0.81
  -1  -6  -4   15.51    0.85
  -1  -6  -4   13.64    0.83
  -1  -6   4   14.40    0.62
  -1   6  -4   13.78    0.56
   1   6   4   14.60    0.85
  -1   6  -4   14.38    0.83
   1   6   4   14.70    0.81
   1  -6  -4   14.55    0.88
   1  -6  -4   15.14    0.75
   2  -6   4  359.47    9.61
  -2  -6  -4  371.33    9.52
  -2   6   4  362.54    9.77
  -2   6   4  394.53    9.63
  -2  -6  -4  358.80    9.64
   2   6  -4  377.46    9.65
   2   6   4  360.98    9.48
  -2   6  -4  371.52    9.47
   2  -6  -4  354.95    9.43
   2   6   4  359.48    9.26
  -2  -6   4  362.57    8.70
  -2  -6   4  361.07    8.72
   2  -6  -4  352.02    9.12
   3  -6   4   54.55    1.46
  -3  -6  -4   55.80    1.94
   3   6  -4   50.95    2.12
  -3   6   4   52.06    2.15
  -3   6  -4   49.50    2.06
   3  -6  -4   51.05    1.80
   3   6   4   52.45    2.12
   3   6   4   51.04    1.86
  -4   6   4   30.76    1.60
   4   6  -4   30.63    1.65
   4  -6   4   31.15    1.09
  -4  -6  -4   30.69    1.36
   4  -6  -4   26.94    1.27
   4   6   4   27.86    1.28
   4   6   4   28.25    1.56
  -4   6  -4   29.17    1.57
   5  -6   4   13.04    0.77
   5   6  -4   13.35    1.17
  -5  -6  -4   12.94    0.89
  -5   6   4   12.36    1.05
   5   6   4   13.21    0.89
   5   6   4   12.13    1.13
  -5   6  -4   11.83    1.09
   5  -6  -4   12.02    0.94
   6   6  -4   14.46    1.37
   6  -6   4   11.56    0.85
  -6  -6  -4   14.81    1.00
  -6   6   4   11.62    1.13
   6  -6  -4   11.85    0.99
  -6   6  -4   10.67    1.17
   6   6   4   12.27    1.24
   7  -6   4    2.31    0.56
  -7   6   4    1.83    0.76
  -7  -6  -4    3.38    0.69
   7   6  -4    2.88    0.86
  -7   6  -4    2.72    0.85
   7   6   4    2.83    0.91
   7  -6  -4    1.72    0.59
  -8   6   4    8.53    1.32
   8  -6   4    8.44    0.98
   8   6  -4    6.90    1.93
   8  -6  -4    6.76    1.04
   8   6   4    7.23    1.22
  -8   6  -4    8.10    1.29
   9   6  -4    2.16    1.10
   9  -6   4    2.62    0.79
  -9   6   4    3.23    1.07
  -9  -6  -4    2.33    0.89
  -9   6  -4    2.56    1.15
   9   6   4    2.63    1.00
   9  -6  -4    2.17    0.91
  10   6  -4   20.41    2.22
 -10   6   4   15.79    2.01
  10   6   4   17.47    1.99
 -10   6  -4   18.16    2.00
  10  -6  -4   15.96    1.76
   0   7  -4    5.02    0.48
   0  -7  -4    6.57    0.61
   0   7  -4    6.63    0.45
   0  -7  -4    7.05    0.62
   0  -7  -4    5.26    0.49
   0   7   4    5.39    0.52
   0  -7   4    5.96    0.47
  -1  -7  -4  194.03    5.99
  -1   7   4  175.01    4.81
   1   7  -4  178.17    4.86
  -1  -7  -4  170.61    4.94
   1   7  -4  170.66    4.64
   1  -7   4  172.57    4.89
  -1  -7  -4  175.46    4.93
  -1  -7   4  171.69    4.58
   1  -7  -4  171.09    4.72
   1  -7  -4  171.91    5.03
  -1   7  -4  171.91    4.45
  -1   7  -4  182.76    4.97
  -1   7  -4  177.86    4.41
   1   7   4  180.67    4.98
  -2   7   4   29.38    1.46
   2  -7   4   27.25    1.54
   2   7  -4   29.71    1.37
  -2  -7  -4   28.20    1.27
  -2  -7  -4   26.23    1.32
   2  -7  -4   30.64    1.18
   2   7   4   29.57    1.44
  -2  -7   4   28.77    0.92
  -2   7  -4   30.08    1.43
  -3   7   4   87.56    3.16
  -3  -7  -4   88.08    2.84
   3   7  -4   89.06    3.10
   3  -7  -4   87.02    2.66
  -3   7  -4   84.50    3.03
   3   7   4   87.10    3.08
   3   7   4   85.79    2.76
  -4  -7  -4    5.98    0.60
   4  -7   4    5.61    0.32
  -4   7   4    5.41    0.75
   4   7  -4    7.58    0.84
  -4   7  -4    4.92    0.73
   4   7   4    5.04    0.56
   4   7   4    5.81    0.74
   4  -7  -4    5.32    0.55
  -5  -7  -4   50.26    1.93
   5  -7   4   44.71    1.54
   5   7  -4   47.50    2.34
  -5   7   4   47.95    2.31
   5   7   4   42.15    2.01
  -5   7  -4   43.60    2.19
   5   7   4   44.40    2.24
   5  -7  -4   43.18    1.82
  -6   7   4    4.22    0.98
  -6  -7  -4    4.53    0.63
   6  -7   4    3.86    0.53
   6   7  -4    5.12    1.09
   6   7   4    3.90    0.92
   6  -7  -4    4.64    0.69
  -6   7  -4    3.17    0.82
  -7  -7  -4    4.07    0.75
   7  -7   4    2.90    0.59
   7   7  -4    2.96    0.88
  -7   7   4    3.63    0.91
  -7   7  -4    4.52    0.96
   7  -7  -4    4.46    0.80
   7   7   4    5.43    1.03
   8   7  -4    4.62    1.13
  -8   7   4    3.69    0.99
   8  -7   4    5.45    0.84
  -8  -7  -4    4.36    0.84
   8   7   4    3.26    0.98
   8  -7  -4    5.21    1.02
  -8   7  -4    3.69    1.01
   9   7  -4   20.27    2.11
  -9   7   4   25.26    2.10
  -9  -7  -4   22.75    1.60
  -9   7  -4   27.42    2.14
   9  -7  -4   24.22    1.77
   9   7   4   23.53    2.09
  10   7  -4    5.34    1.56
 -10   7   4    9.38    1.82
 -10   7  -4    7.45    1.63
  10  -7  -4    7.21    1.82
  10   7   4    5.51    1.48
   0   8  -4   15.84    0.89
   0  -8  -4   16.43    0.99
   0  -8   4   15.43    0.83
   0  -8  -4   17.45    0.90
   0  -8  -4   16.33    1.01
   0   8  -4   15.90    0.78
   0   8   4   16.24    0.90
  -1   8   4  246.20    6.50
  -1  -8  -4  238.34    6.61
   1  -8   4  239.42    6.59
  -1  -8  -4  241.52    6.69
   1   8  -4  249.91    6.55
   1   8  -4  241.15    6.61
  -1  -8  -4  247.77    6.68
  -1   8   4  249.40    6.92
   1   8   4  245.38    6.66
  -1   8  -4  251.15    6.68
  -1  -8   4  239.14    6.27
   1  -8  -4  240.68    6.40
  -1   8  -4  242.57    6.06
  -1   8  -4  242.79    6.09
  -2  -8  -4   55.23    2.06
  -2   8   4   52.09    2.22
  -2  -8  -4   55.64    2.02
   2   8  -4   53.61    2.09
  -2   8   4   51.79    1.86
   2   8   4   54.44    2.16
   2  -8  -4   52.79    1.79
  -2   8  -4   53.90    2.15
  -2  -8   4   52.55    1.57
   3   8  -4   49.37    2.11
  -3   8   4   44.16    2.11
  -3  -8  -4   49.29    1.87
   3   8   4   45.02    2.03
   3   8   4   45.18    1.76
   3  -8  -4   42.73    1.60
  -3   8  -4   45.39    2.03
  -4  -8  -4   11.27    0.79
   4   8  -4   10.76    1.04
  -4   8   4    9.15    0.99
   4  -8  -4   11.43    0.77
  -4   8  -4   11.41    1.45
   4   8   4   10.75    0.84
  -5   8   4    3.41    0.74
  -5  -8  -4    5.26    0.64
   5  -8   4    4.35    0.31
   5   8  -4    4.77    0.84
   5  -8  -4    4.31    0.67
  -5   8  -4    4.20    0.80
   5   8   4    3.49    0.76
   6   8  -4   14.44    1.40
   6  -8   4   14.74    0.80
  -6   8   4   14.78    1.35
  -6  -8  -4   17.21    1.10
   6  -8   4   15.31    0.78
   6   8   4   14.48    1.41
   6  -8  -4   16.57    1.05
  -6   8  -4   19.21    1.53
   7  -8   4    9.29    0.75
   7   8  -4   12.86    1.45
  -7  -8  -4   10.31    0.92
   7  -8   4    9.58    0.88
  -7   8   4    6.89    1.10
   7   8   4    8.33    1.26
  -7   8  -4   10.18    1.39
   7  -8  -4   10.39    1.00
   8   8  -4   13.42    1.69
   8  -8   4   10.53    0.97
  -8  -8  -4    8.47    0.97
  -8   8   4   10.63    1.47
  -8   8  -4    9.52    1.41
   8  -8  -4    9.31    1.07
   8   8   4   12.43    1.57
   9   8  -4   10.62    1.72
  -9   8   4   11.26    1.70
  -9   8  -4   10.73    1.63
   9  -8  -4    8.72    1.30
   9   8   4    9.42    1.58
  10   8  -4   10.46    1.75
  10   8   4    9.69    1.93
   0   9   4  231.31    6.33
   0  -9  -4  229.10    6.52
   0   9  -4  236.24    6.08
   0   9  -4  232.29    6.32
   0  -9   4  228.49    6.22
   0  -9  -4  231.71    6.54
  -1  -9  -4   36.56    1.66
  -1   9   4   38.08    1.82
  -1   9   4   39.13    1.53
   1   9  -4   38.11    1.56
  -1  -9  -4   37.11    1.61
   1   9  -4   39.34    1.50
  -1  -9  -4   38.25    1.67
  -1   9  -4   39.09    1.18
  -1   9  -4   36.29    1.65
   1   9   4   36.47    1.62
   1  -9  -4   35.94    1.42
  -1   9  -4   36.35    1.19
  -1  -9   4   36.60    1.36
  -2   9   4   20.95    1.04
  -2  -9  -4   21.74    1.21
  -2   9   4   23.52    1.39
  -2  -9  -4   22.24    1.18
   2   9  -4   22.32    1.23
  -2   9  -4   22.02    1.32
   2  -9  -4   22.98    1.02
  -2  -9   4   22.66    0.92
  -2  -9   4   22.14    0.88
   2   9   4   22.61    1.30
  -3  -9  -4   48.79    1.98
  -3  -9  -4   51.77    1.98
   3   9  -4   48.30    2.16
  -3   9   4   50.77    2.33
  -3   9  -4   42.20    2.06
  -3  -9   4   45.62    1.24
  -3  -9   4   46.01    1.33
   3   9   4   44.19    2.09
   3  -9  -4   45.65    1.62
   4   9  -4   34.59    1.95
  -4  -9  -4   37.93    1.64
  -4   9   4   40.43    2.10
  -4   9  -4   32.36    1.83
   4   9   4   31.65    1.85
   4   9   4   32.23    1.50
   4  -9  -4   30.60    1.32
   5   9  -4    1.12    0.58
  -5   9   4    1.97    0.75
  -5  -9  -4    0.52    0.32
   5   9   4    0.82    0.57
  -5   9  -4    1.20    0.64
   6   9  -4    8.38    1.18
  -6   9   4    7.52    1.08
  -6  -9  -4    8.62    0.80
   6  -9  -4   10.37    0.83
   6   9   4    9.68    1.22
  -6   9  -4    9.76    1.21
   6  -9  -4    8.17    0.93
  -7  -9  -4   11.90    1.01
   7   9  -4    9.75    1.41
   7  -9   4    9.49    0.60
   7  -9   4   10.36    0.60
  -7   9   4   12.62    1.42
   7   9   4   11.95    1.41
  -7   9  -4   10.90    1.41
   7  -9  -4   11.03    0.99
  -8   9   4   17.93    1.97
   8   9  -4   17.80    1.92
  -8  -9  -4   12.46    1.13
   8   9   4   18.52    1.88
   8  -9  -4   15.28    1.29
  -8   9  -4   18.81    1.91
  -9   9   4    3.50    1.26
   9   9  -4    3.07    0.99
  -9   9  -4    4.04    1.25
   9   9   4    2.61    1.03
   0 -10  -4    1.82    0.46
   0  10  -4    2.14    0.45
   0  10   4    2.01    0.48
   0 -10  -4    2.30    0.45
   0 -10   4    1.61    0.40
   0  10  -4    1.48    0.35
   1  10  -4  127.25    3.77
  -1 -10  -4  123.99    3.95
  -1  10   4  119.97    3.68
   1  10  -4  125.02    3.70
  -1  10   4  123.84    4.17
  -1  10  -4  119.03    3.80
   1  10   4  119.21    3.76
   1 -10  -4  113.35    3.44
  -1  10  -4  120.88    3.13
  -1  10  -4  115.56    3.15
  -1 -10   4  115.43    3.41
  -2  10   4   33.99    1.82
   2  10  -4   30.37    1.54
  -2  10   4   33.74    1.40
  -2 -10  -4   33.94    1.58
  -2 -10   4   30.37    1.17
   2  10   4   33.05    1.65
  -2  10  -4   30.78    1.65
   2 -10  -4   32.53    1.28
  -3 -10  -4    3.25    0.56
  -3  10   4    2.12    0.65
   3  10  -4    3.40    0.70
  -3 -10   4    2.27    0.27
  -3 -10   4    2.77    0.30
   3  10   4    3.58    0.79
   3 -10  -4    2.79    0.42
  -4 -10  -4    9.01    0.80
   4  10  -4    6.27    0.93
  -4  10   4    7.48    1.07
   4 -10  -4    9.61    0.67
   4  10   4    7.71    0.99
  -4  10  -4    7.16    1.02
  -5 -10  -4    4.61    0.64
  -5  10   4    4.52    0.97
   5  10  -4    4.74    0.90
  -5  10  -4    8.16    1.10
   5  10   4    5.19    0.92
   5 -10  -4    5.33    0.63
   6  10  -4   13.32    1.38
  -6  10   4   13.28    1.47
  -6 -10  -4   14.93    1.03
   6  10   4   13.04    1.45
  -6  10  -4   11.63    1.38
   6 -10  -4   14.10    1.04
   6 -10  -4   13.43    0.92
  -7 -10  -4   57.04    2.28
   7  10  -4   64.00    4.30
  -7  10   4   56.22    3.07
   7 -10  -4   54.62    2.08
   7  10   4   52.30    3.77
  -7  10  -4   53.03    3.11
  -8  10   4   11.34    1.60
   8  10  -4   11.14    1.58
  -8 -10  -4    9.36    1.13
  -8  10  -4    6.92    1.35
   8 -10  -4    9.82    1.08
   8  10   4    9.13    1.47
   9  10  -4    0.35    0.79
  -9  10   4   -0.17    0.91
  -9  10  -4   -1.34    0.86
   9  10   4    0.66    0.82
   0 -11  -4  208.00    5.96
   0  11  -4  223.60    6.18
   0 -11  -4  218.40    6.36
   0  11   4  212.56    6.06
   0  11  -4  214.07    5.77
  -1  11   4   20.04    1.39
  -1  11   4   19.35    1.07
   1  11  -4   19.29    1.12
  -1 -11  -4   19.73    1.25
   1  11  -4   19.99    1.10
  -1  11  -4   21.74    1.30
   1  11   4   20.78    1.24
  -1 -11   4   19.24    1.01
  -1  11  -4   20.41    0.81
  -1  11  -4   19.53    0.81
   2  11  -4    8.72    0.86
  -2  11   4    8.03    0.68
  -2 -11  -4    8.19    0.82
  -2  11  -4    8.19    0.87
  -2 -11   4    7.33    0.58
   2  11   4    8.59    0.89
   2 -11  -4    8.08    0.61
  -2 -11   4    8.86    0.65
   3  11  -4    9.36    1.00
  -3 -11  -4   11.82    0.92
  -3  11   4   11.36    1.13
  -3 -11   4   11.84    0.61
   3  11   4   10.92    1.07
  -3  11  -4   11.19    1.12
  -3 -11   4   10.24    0.55
   3 -11  -4   11.59    0.71
  -4 -11  -4    8.57    0.82
  -4  11   4    7.56    1.13
   4  11  -4    9.25    1.08
  -4  11  -4    8.71    1.08
   4 -11  -4    8.24    0.64
   4  11   4    8.59    1.11
  -5 -11  -4    4.01    0.72
   5  11  -4    6.09    1.01
  -5  11   4    3.81    1.00
   5 -11  -4    5.13    0.62
  -5  11  -4    3.80    0.88
   5 -11  -4    4.49    0.53
   5  11   4    4.67    0.95
   6  11  -4   15.92    1.61
  -6  11   4   15.75    1.59
  -6 -11  -4   15.06    1.04
  -6  11  -4   16.70    1.60
   6  11   4   13.92    1.51
   6 -11  -4   15.21    1.00
   6 -11  -4   15.23    0.89
  -7 -11  -4    8.51    0.92
   7  11  -4    7.13    1.44
   7 -11  -4    6.97    0.81
   7  11   4    7.71    1.36
  -7  11  -4    7.45    1.54
  -8  11   4   10.91    1.75
  -8 -11  -4   10.10    1.16
   8  11  -4   12.20    1.73
   8  11   4   12.66    1.71
  -8  11  -4   15.98    1.80
  -9  11   4    2.34    1.16
   9  11  -4    1.62    1.34
   9  11   4    6.05    1.61
  -9  11  -4    0.19    0.96
   0 -12  -4   48.60    2.22
   0  12   4   49.15    2.00
   0  12  -4   47.59    2.07
   0  12  -4   44.31    1.74
  -1 -12  -4   54.91    2.36
  -1  12   4   54.84    3.70
   1  12  -4   58.10    2.22
   1  12  -4   55.51    2.15
  -1  12   4   55.04    2.10
  -1  12  -4   59.40    2.42
  -1  12  -4   52.55    1.69
   1 -12  -4   53.93    1.99
  -1 -12   4   51.46    1.99
   1  12   4   55.97    2.31
  -1  12  -4   55.44    1.69
  -2 -12  -4   13.11    1.07
  -2  12   4   13.36    1.28
  -2  12   4   13.41    0.86
   2  12  -4   15.49    1.12
   2 -12  -4   11.52    0.79
  -2 -12   4   11.91    0.79
  -2 -12   4   12.80    0.82
   2  12   4   12.43    1.11
  -2  12  -4   13.32    1.17
  -3 -12  -4   10.43    0.94
  -3  12   4    8.46    1.12
   3  12  -4    8.97    0.99
  -3  12  -4    8.12    1.04
  -3 -12   4    8.82    0.59
   3  12   4    9.19    0.99
  -3 -12   4    8.71    0.55
   3 -12  -4    7.40    0.63
   4  12  -4    4.38    0.86
  -4 -12  -4    4.66    0.71
  -4  12   4    4.23    0.92
   4 -12  -4    5.43    0.52
   4  12   4    3.86    0.85
  -4  12  -4    5.05    1.00
  -5 -12  -4   11.42    0.97
  -5  12   4    9.58    1.37
   5  12  -4   10.06    1.23
   5 -12  -4   10.09    0.66
   5 -12  -4    9.85    0.81
  -5  12  -4   11.01    1.26
   5  12   4   13.90    1.42
   6  12  -4    3.07    0.89
  -6  12   4    3.19    1.07
  -6 -12  -4    2.98    0.63
  -6  12  -4    2.86    0.96
   6  12   4    3.32    0.98
   7  12  -4   30.99    2.33
  -7 -12  -4   30.57    1.57
  -7  12   4   34.26    2.54
   7  12   4   32.77    2.45
  -7  12  -4   31.58    2.37
  -8  12   4    1.75    1.09
   8  12  -4   -0.24    0.79
   8  12   4    3.10    1.01
  -8  12  -4    1.96    0.96
  -9  12   4    0.05    1.20
   9  12  -4   -0.31    0.96
  -9  12  -4    1.92    1.88
   9  12   4    0.20    1.10
   0  13   4   69.83    2.60
   0  13  -4   70.71    2.77
   0  13  -4   68.13    2.33
  -1  13   4   23.95    1.64
  -1 -13  -4   25.75    1.56
   1  13  -4   24.96    1.41
   1  13  -4   23.08    1.31
  -1  13   4   23.23    1.28
  -1  13  -4   24.43    1.55
   1  13   4   25.09    1.48
  -1  13  -4   22.81    0.96
   1 -13  -4   23.43    1.23
  -1  13  -4   25.18    0.96
   1 -13  -4   23.48    1.64
   2  13  -4   17.93    1.25
  -2 -13  -4   16.70    1.25
  -2  13   4   15.85    0.96
  -2  13   4   15.31    1.39
   2 -13  -4   17.08    0.97
  -2  13  -4   17.12    1.35
  -2 -13   4   15.17    0.94
  -2 -13   4   15.40    0.98
   3  13  -4    3.07    0.82
  -3  13   4    4.88    0.97
  -3 -13  -4    2.70    0.67
  -3 -13   4    2.10    0.46
   3  13   4    3.87    0.86
   3 -13  -4    3.76    0.50
  -3 -13   4    2.92    0.49
  -3  13  -4    3.00    0.78
  -4 -13  -4    7.92    0.88
   4  13  -4    5.93    1.03
  -4  13   4    5.61    1.04
   4 -13  -4    6.85    0.53
   4  13   4    6.79    1.10
  -4  13  -4    6.56    1.14
   5  13  -4   10.08    1.30
  -5 -13  -4   10.74    1.03
  -5  13   4    9.17    1.36
   5 -13  -4    9.70    0.50
   5 -13  -4    9.76    0.70
   5  13   4   12.00    1.44
  -5  13  -4   10.46    1.37
  -6  13   4   14.94    2.19
   6  13  -4   18.97    2.46
  -6 -13  -4   15.57    1.19
  -6  13  -4   15.62    1.74
   6  13   4   17.50    1.83
   7  13  -4    4.55    1.07
  -7  13   4    2.80    1.04
  -7 -13  -4    5.00    0.83
   7  13   4    7.54    1.59
  -7  13  -4    3.10    1.06
   8  13  -4    8.65    1.69
  -8  13   4   12.10    1.89
   8  13   4    8.06    1.74
  -8  13  -4    9.03    1.81
   0  14   4   31.45    1.62
   0  14  -4   30.16    1.73
   0 -14  -4   31.03    1.86
   0  14  -4   28.43    1.36
  -1 -14  -4   29.20    1.71
   1  14  -4   25.06    1.44
  -1  14   4   27.40    1.39
   1  14  -4   28.06    1.59
  -1  14  -4   25.08    1.64
   1 -14  -4   27.12    1.36
  -1  14  -4   26.01    1.01
   1  14   4   27.48    1.58
  -1  14  -4   23.13    0.98
   1 -14  -4   26.54    1.76
  -2  14   4    8.03    0.75
  -2  14   4    8.69    1.19
  -2 -14  -4   10.41    1.05
   2  14  -4    7.95    0.97
  -2 -14   4    7.01    0.80
  -2 -14   4    8.26    0.80
   2 -14  -4    7.71    0.77
  -2  14  -4    8.48    1.06
   2  14   4   10.59    1.08
  -3 -14  -4    7.12    0.90
   3  14  -4    6.85    0.98
  -3  14   4    8.29    1.26
   3  14   4    9.38    1.12
  -3  14  -4    7.72    1.13
  -3 -14   4    7.77    0.70
   3 -14  -4    6.88    0.64
  -4 -14  -4    4.39    0.91
  -4  14   4    2.11    0.68
   4  14  -4    4.08    0.90
  -4  14  -4    3.17    0.90
   4 -14  -4    3.00    0.39
   4  14   4    2.91    0.76
   5  14  -4    7.69    1.24
  -5 -14  -4    7.07    0.95
  -5  14   4    6.40    1.30
  -5  14  -4    8.47    1.27
   5  14   4    6.32    1.22
   6  14  -4   13.14    1.59
  -6 -14  -4   16.05    1.16
  -6  14   4   16.23    1.87
   6  14   4   15.12    1.70
  -6  14  -4   16.33    1.77
   7  14  -4    4.34    1.17
  -7  14   4    6.39    1.45
  -7  14  -4    7.09    1.56
   7  14   4    4.39    1.27
  -8  14   4   10.90    1.94
   8  14  -4   12.22    1.81
   8  14   4    7.39    1.62
  -8  14  -4   10.14    1.77
   0  15  -4    3.83    0.84
   0  15  -4    3.35    0.63
   0 -15  -4    4.21    0.97
   0  15   4    4.35    0.74
  -1  15   4   12.04    1.00
   1  15  -4   11.45    1.00
   1  15  -4   12.12    1.15
  -1 -15  -4   13.74    1.24
  -1  15  -4   11.75    1.23
  -1  15  -4   12.43    0.86
  -1  15  -4   12.53    0.69
   1  15   4   13.46    1.17
   1 -15  -4   12.29    1.28
  -2  15   4   18.30    1.07
   2  15  -4   19.10    1.47
  -2 -15  -4   18.30    1.40
  -2  15   4   19.98    1.68
  -2  15  -4   21.16    1.66
   2  15   4   19.34    1.49
  -2 -15   4   21.08    1.31
  -3  15   4   10.10    1.36
   3  15  -4   12.27    1.26
  -3 -15  -4   13.72    1.25
  -3 -15   4   14.28    0.96
   3 -15  -4   15.02    0.81
  -3 -15   4   12.34    0.95
  -3  15  -4   16.00    1.49
   3  15   4   16.34    1.46
  -4  15   4    0.01    0.60
  -4 -15  -4    0.59    0.60
   4  15  -4   -0.33    0.52
  -4  15  -4    0.20    0.67
  -4 -15   4    0.19    0.30
  -4 -15   4   -0.02    0.23
   4  15   4    0.31    0.57
   5  15  -4   17.97    1.72
  -5 -15  -4   18.34    1.35
  -5  15   4   15.86    1.89
  -5  15  -4   15.17    1.69
   5  15   4   13.38    1.69
  -6 -15  -4   24.20    1.48
  -6  15   4   27.61    2.39
   6  15  -4   20.66    2.00
   6  15   4   25.92    2.23
  -6  15  -4   20.81    2.12
  -7  15   4    2.80    1.29
   7  15  -4    1.54    0.95
   7  15   4    0.58    0.93
  -7  15  -4    1.97    1.04
   8  15  -4    4.64    1.47
  -8  15   4    4.98    1.76
  -8  15  -4    5.21    1.75
   8  15   4    4.38    1.38
   0 -16  -4   -0.13    0.53
   0  16  -4    0.18    0.41
   0  16  -4    0.11    0.54
   0  16   4    0.22    0.47
  -1  16   4   14.34    1.13
   1  16  -4   18.09    1.44
  -1 -16  -4   14.86    1.30
   1  16  -4   15.75    1.21
  -1  16  -4   15.74    0.82
   1  16   4   16.34    1.30
  -1  16  -4   16.61    0.79
  -1  16  -4   15.91    1.46
   1 -16  -4   18.75    1.61
  -2  16   4   41.54    1.73
   2  16  -4   45.68    2.19
  -2 -16  -4   47.01    2.38
  -2  16   4   43.15    2.67
  -2 -16   4   42.43    2.01
   2  16   4   43.98    2.33
  -2  16  -4   43.60    2.51
   2 -16  -4   43.68    2.15
  -3  16   4    1.15    0.75
  -3 -16  -4    0.82    0.65
   3  16  -4    0.81    0.64
   3 -16  -4    0.23    0.33
  -3 -16   4    0.32    0.59
  -3  16  -4    0.99    0.76
   3  16   4    1.12    0.64
  -3 -16   4    0.27    0.50
  -4  16   4   12.42    1.76
  -4 -16  -4   15.39    1.29
   4  16  -4   11.99    1.40
  -4 -16   4   12.74    0.66
  -4  16  -4   13.22    1.66
   4  16   4   11.97    1.45
  -5 -16  -4   10.12    1.45
   5  16  -4    9.39    1.52
  -5  16   4    9.29    1.57
  -5  16  -4   10.14    1.61
   5  16   4    8.47    1.49
  -6 -16  -4    1.24    0.83
   6  16  -4    1.69    1.09
  -6  16   4    3.33    1.22
  -6  16  -4    1.94    0.94
   6  16   4    0.48    0.88
  -7  16   4    4.06    1.44
   7  16  -4    3.50    1.25
  -7  16  -4    3.56    1.26
   7  16   4    5.59    1.40
   0  17  -4    4.29    0.70
   0 -17  -4    2.50    0.78
   0  17  -4    1.50    0.81
   0  17   4    4.87    0.86
  -1  17   4    6.32    0.89
  -1 -17  -4    5.54    1.01
   1  17  -4    6.47    0.93
  -1  17  -4    7.44    0.63
   1  17   4    8.00    1.09
  -1  17  -4    6.06    0.54
  -1  17  -4    5.47    1.06
  -1 -17   4    6.99    1.03
   1 -17  -4    7.54    1.21
  -2 -17  -4   16.86    1.48
   2  17  -4   14.56    1.35
  -2  17   4   15.08    1.02
   2 -17  -4   15.23    1.69
   2  17   4   18.02    1.50
  -2  17  -4   16.40    1.60
  -2 -17   4   16.04    1.29
   3  17  -4   24.37    1.78
  -3 -17  -4   29.91    1.89
  -3  17   4   36.38    3.49
   3  17   4   26.31    1.93
  -3  17  -4   23.49    1.95
  -3 -17   4   26.67    1.44
   4  17  -4   14.46    1.57
  -4 -17  -4   14.45    1.29
  -4  17   4   16.76    1.92
  -4 -17   4   13.20    1.00
  -4  17  -4   13.59    1.77
   4  17   4   16.18    1.62
  -5 -17  -4   22.02    1.59
   5  17  -4   21.25    1.99
  -5  17   4   21.96    2.23
  -5  17  -4   22.04    2.17
   5  17   4   22.19    2.05
   6  17  -4    6.91    1.50
  -6  17   4    8.91    1.86
   6  17   4    6.33    1.39
  -6  17  -4    3.48    1.44
  -7  17   4    2.72    1.62
   7  17  -4   -0.45    0.91
  -7  17  -4    1.17    1.00
   7  17   4    2.42    2.10
   0  18  -4   -0.16    0.51
   0  18  -4    0.52    0.71
   0 -18  -4    0.53    0.77
   0  18   4    0.13    0.68
  -1  18   4    3.88    0.92
   1  18  -4    4.26    0.88
  -1 -18  -4    5.80    1.22
   1  18   4    5.17    1.01
  -1  18  -4    5.44    1.21
  -1 -18   4    3.99    0.99
   1 -18  -4    6.67    1.25
  -2  18   4   19.50    1.16
  -2 -18  -4   21.21    1.73
   2  18  -4   18.44    1.56
  -2  18  -4   20.00    1.81
   2 -18  -4   24.94    2.26
   2  18   4   22.86    1.75
  -2 -18   4   21.05    2.18
   3  18  -4   19.21    1.66
  -3  18   4   17.27    1.94
  -3 -18  -4   19.28    1.64
  -3  18  -4   18.14    1.83
  -3 -18   4   19.59    1.34
   3  18   4   18.87    1.69
   4  18  -4   16.67    1.66
  -4 -18  -4   15.15    1.49
  -4  18   4   17.08    1.92
   4  18   4   15.25    1.70
  -4  18  -4   14.87    1.74
  -5 -18  -4    2.00    0.97
   5  18  -4    2.62    1.03
  -5  18   4    5.20    1.41
   5  18   4    1.80    0.91
  -5  18  -4    2.51    1.08
  -6  18   4    1.04    1.29
   6  18  -4   -0.23    0.88
   6  18   4    1.28    1.13
  -6  18  -4    2.25    1.05
   0  19  -4    2.87    1.03
   0 -19  -4    1.68    0.79
   0  19  -4    1.48    0.59
   0  19   4    2.74    0.83
  -1 -19  -4    0.06    0.65
   1  19  -4    1.26    0.71
  -1  19   4    1.47    0.69
  -1  19  -4    1.77    0.86
  -1 -19   4    0.98    0.84
   1  19   4    1.71    0.81
  -2 -19  -4    2.71    0.89
  -2  19   4    2.64    0.83
   2  19  -4    1.77    0.83
   2  19   4    0.77    0.78
  -2  19  -4    1.54    1.17
   2 -19  -4    3.59    1.14
  -2 -19   4    3.60    0.91
   3  19  -4   17.40    1.73
  -3 -19  -4   20.90    1.74
  -3 -19   4   19.49    1.57
  -3  19  -4   23.22    2.09
   3  19   4   20.11    1.81
   3 -19  -4   19.00    2.06
  -4 -19  -4    8.23    1.30
  -4  19   4    4.78    1.58
   4  19  -4    8.40    1.48
  -4  19  -4    8.90    1.67
   4  19   4    6.77    1.43
   5  19  -4    4.55    1.10
  -5 -19  -4    2.66    1.34
  -5  19   4    5.12    1.35
   5  19   4    5.38    1.35
  -5  19  -4    2.19    1.09
  -6  19   4    4.07    1.35
   6  19  -4    3.92    1.37
  -6  19  -4   -0.29    1.30
   6  19   4    3.72    1.72
   0 -20   4   -0.08    0.82
   0  20   4    0.76    0.86
   0  20  -4   -0.65    0.69
   0 -20  -4   -0.05    0.89
  -1  20   4    5.77    1.09
   1  20  -4    8.64    1.28
  -1 -20  -4    5.96    1.32
  -1  20  -4    8.00    2.25
   1  20   4    6.87    1.34
   1 -20  -4    3.40    1.15
  -1 -20   4    7.49    1.38
   2  20  -4    1.75    0.84
  -2 -20  -4    1.10    1.00
  -2 -20   4    1.47    0.92
  -2  20  -4    3.07    1.08
   2  20   4    1.75    0.94
   2 -20  -4    0.91    0.96
  -3 -20  -4   12.93    1.70
   3  20  -4   11.91    1.64
   3  20   4    9.41    1.64
   3 -20  -4    9.27    1.71
  -3  20  -4   11.38    1.82
  -3 -20   4    9.67    2.25
   4  20  -4   26.88    2.22
  -4  20   4   27.81    2.70
  -4 -20  -4   23.80    2.04
   4 -20  -4   26.68    2.50
   4  20   4   22.95    2.30
  -4  20  -4   25.83    2.55
   5  20  -4    0.62    1.01
  -5  20   4   -1.22    1.13
  -5  20  -4    4.11    2.06
   5  20   4   -0.65    1.13
   0 -21  -4   34.69    2.45
   0  21   4   32.63    2.18
   0 -21   4   35.73    2.40
  -1 -21  -4    1.82    1.05
   1  21  -4    1.73    0.96
  -1  21  -4    3.82    1.21
   1  21   4    3.22    1.07
   1 -21  -4    1.66    0.99
  -1 -21   4    2.66    1.17
  -2 -21  -4   -1.06    1.15
   2  21  -4    1.02    0.90
   2  21   4    0.86    1.03
  -2  21  -4    1.72    1.15
  -2 -21   4    0.54    1.03
   2 -21  -4    0.10    0.96
  -3 -21  -4   12.30    1.73
   3  21  -4   11.37    1.65
   3  21   4    9.08    1.73
   3 -21  -4   13.33    2.14
  -3  21  -4    9.35    1.80
  -4 -21  -4    0.12    1.40
   4  21  -4    0.67    1.16
  -4  21  -4    1.43    1.49
   4  21   4   -0.56    1.12
   4 -21  -4    0.54    1.43
   0 -22   4    6.39    1.43
   0 -22  -4    7.29    1.50
   1 -22   4    4.25    1.29
  -1 -22  -4    8.89    1.86
  -1  22  -4    8.96    1.93
  -1 -22   4    7.56    1.53
   1  22   4    6.61    1.54
   1 -22  -4    5.90    1.55
   2  22  -4    3.79    1.35
   2 -22  -4    2.47    1.32
   2  22   4    1.44    1.09
  -2  22  -4    3.17    1.28
  -2 -22   4    2.17    2.11
   3  22  -4   -0.26    1.21
  -3 -22  -4    1.05    1.34
   3  22   4    0.65    1.16
  -3  22  -4   -0.34    1.25
   3 -22  -4    0.22    1.55
   0 -23  -4   26.56    2.48
   0 -23   4   22.34    2.33
   0   0   5    0.21    0.13
   0   0  -5    0.20    0.11
   0   0   5    0.08    0.14
   0   0  -5    0.18    0.13
  -1   0  -5    1.43    0.24
  -1   0   5    1.48    0.21
   1   0   5    1.05    0.21
   1   0   5    1.37    0.25
   1   0  -5    1.20    0.27
  -1   0   5    1.26    0.24
  -1   0  -5    1.28    0.23
   1   0  -5    1.15    0.19
   2   0  -5   15.50    0.67
   2   0  -5   15.30    0.67
  -2   0  -5   15.40    0.77
   2   0   5   15.59    0.80
   2   0  -5   16.35    0.89
  -2   0  -5   15.35    0.79
   3   0  -5  700.20   17.24
  -3   0   5  722.78   17.32
   3   0   5  720.69   17.54
  -3   0  -5  711.10   17.55
   3   0   5  696.48   17.53
  -3   0  -5  691.35   17.46
   4   0  -5    2.43    0.34
  -4   0  -5    3.92    0.51
  -4   0   5    2.32    0.37
   4   0   5    3.12    0.47
   4   0   5    3.77    0.55
  -4   0  -5    3.91    0.50
  -5   0   5   35.80    1.46
   5   0  -5   34.42    1.72
   5   0   5   34.53    1.67
  -5   0  -5   36.58    1.70
   5   0  -5   32.96    1.38
   6   0  -5    2.03    0.48
   6   0   5    2.13    0.65
   6   0  -5    1.49    0.52
  -6   0   5    0.97    0.41
  -6   0  -5    2.12    0.61
   7   0   5   23.68    1.63
  -7   0   5   23.47    1.40
  -7   0  -5   26.77    1.62
   7   0  -5   25.89    1.74
  -8   0   5   -0.31    0.49
  -8   0  -5   -0.27    0.52
   8   0  -5    0.35    0.55
   8   0   5    0.07    0.55
  -9   0   5    0.87    0.70
  -9   0  -5    0.49    0.72
   9   0   5    1.01    0.65
  10   0   5    0.27    0.80
 -10   0  -5    0.71    0.88
  10   0  -5    0.69    0.93
   0  -1  -5   58.20    1.76
   0  -1   5   54.75    1.68
   0   1   5   56.41    1.74
   0  -1   5   57.43    1.79
   0   1   5   55.37    1.81
   0   1  -5   58.79    1.70
   0  -1  -5   53.24    1.77
   0   1  -5   58.07    1.79
  -1  -1  -5   43.30    1.49
  -1  -1  -5   41.95    1.48
  -1   1   5   45.46    1.57
   1   1  -5   44.87    1.57
   1  -1   5   45.61    1.46
   1   1  -5   44.54    1.33
   1  -1   5   43.72    1.47
  -1   1   5   42.31    1.42
  -1  -1   5   44.37    1.56
  -1   1  -5   44.66    1.44
   1  -1  -5   42.55    1.52
   1   1   5   41.99    1.46
   1   1   5   43.33    1.51
  -1   1  -5   43.67    1.46
   1  -1  -5   44.10    1.43
  -1  -1   5   45.61    1.33
   2  -1   5   23.55    0.97
   2   1  -5   22.45    1.10
   2  -1   5   23.25    1.02
  -2  -1  -5   22.70    1.00
  -2  -1  -5   23.25    1.01
   2   1  -5   23.31    0.81
   2   1  -5   23.67    0.82
   2  -1  -5   25.71    1.00
  -2   1  -5   24.06    0.99
  -2   1  -5   25.42    1.08
   2  -1  -5   26.09    1.16
   2   1   5   24.31    1.05
   2  -1  -5   25.81    0.99
   2   1   5   25.05    1.09
   3  -1   5   24.90    1.17
   3  -1   5   24.08    1.10
  -3   1   5   24.93    1.07
  -3  -1  -5   24.44    1.15
   3   1  -5   25.70    0.91
  -3   1  -5   25.28    1.21
   3   1   5   25.32    1.20
   3  -1  -5   27.82    1.62
  -3   1  -5   24.88    1.09
   3  -1  -5   24.73    1.04
   4   1  -5  294.45    7.62
  -4  -1  -5  306.66    8.06
  -4   1   5  302.02    7.91
  -4  -1  -5  299.61    8.14
   4  -1   5  307.49    8.04
  -4   1  -5  288.52    7.91
  -4  -1   5  307.73    7.69
  -4   1  -5  317.10    8.16
   4  -1  -5  288.56    7.80
   4   1   5  293.08    8.00
   4   1   5  314.04    8.17
  -5  -1  -5    6.50    0.70
   5  -1   5    6.95    0.72
   5   1  -5    5.76    0.50
   5   1  -5    6.19    0.77
  -5   1   5    5.41    0.60
  -5   1  -5    5.81    0.70
   5  -1  -5    5.96    0.60
   5   1   5    6.82    0.74
  -5  -1   5    6.02    0.55
   6  -1   5   15.55    1.18
  -6   1   5   13.42    0.96
   6   1  -5   13.62    1.19
  -6  -1  -5   14.84    1.11
   6   1  -5   13.09    0.86
   6   1   5   15.87    1.28
  -6  -1   5   13.35    0.88
   6  -1  -5   13.25    1.41
  -6   1  -5   14.33    1.15
  -7  -1  -5    2.95    0.78
  -7   1   5    3.61    0.75
   7   1  -5    5.00    0.73
   7  -1   5    3.96    0.83
   7   1  -5    5.70    0.96
  -7   1  -5    5.23    0.90
   7  -1  -5    4.16    0.87
   7   1   5    3.62    0.81
  -7  -1   5    4.09    0.69
  -8  -1  -5   10.13    1.13
   8  -1   5    6.47    1.05
  -8   1   5    7.95    1.10
   8   1  -5    6.79    1.21
  -8  -1   5    8.13    0.93
   8   1   5    8.86    1.21
  -8   1  -5    9.03    1.19
   8  -1  -5    8.95    1.18
   9  -1   5    3.58    0.89
   9   1  -5    3.76    0.94
  -9   1   5    3.53    0.81
  -9  -1  -5    4.52    1.01
  -9   1  -5    2.35    0.89
   9  -1  -5    2.59    0.88
  -9  -1   5    3.36    0.89
   9   1   5    1.24    0.77
  10  -1   5    4.42    1.11
 -10   1   5    3.68    1.26
  10   1  -5    5.75    1.42
  10  -1  -5    5.70    1.40
  10   1   5    6.31    1.33
 -10   1  -5    5.73    1.31
   0   2  -5   18.94    0.74
   0  -2   5   19.23    0.82
   0   2   5   16.71    0.78
   0   2  -5   19.42    0.82
   0  -2   5   18.59    0.73
   0   2   5   18.74    0.86
   0  -2  -5   16.74    0.80
   1   2  -5  147.13    4.14
   1   2  -5  150.40    3.78
   1  -2   5  147.29    4.01
  -1  -2  -5  142.21    4.05
  -1   2   5  151.73    4.13
   1  -2   5  151.16    3.95
  -1  -2   5  146.76    3.70
   1  -2  -5  149.11    3.99
   1  -2  -5  140.72    3.97
  -1   2  -5  145.37    3.83
   1   2   5  139.07    3.93
   1  -2  -5  145.25    3.94
   1   2   5  145.80    4.05
   2  -2   5   27.51    1.03
   2   2  -5   27.07    0.83
  -2  -2  -5   24.82    1.12
   2  -2   5   25.86    1.13
  -2  -2  -5   27.48    1.13
  -2   2   5   25.02    1.11
  -2   2   5   27.69    1.20
   2  -2  -5   27.16    1.19
  -2   2  -5   28.50    1.18
   2  -2  -5   27.96    1.12
   2   2   5   25.56    1.10
   2   2   5   29.06    1.22
  -2   2  -5   27.00    1.02
  -3  -2  -5  374.08    9.35
   3   2  -5  362.34    8.86
   3   2  -5  362.38    8.85
  -3   2   5  361.39    9.32
   3  -2   5  355.88    9.41
   3  -2   5  363.00    9.19
  -3  -2  -5  357.96    9.41
  -3   2  -5  353.09    9.01
   3  -2  -5  362.12    9.35
  -3   2  -5  351.92    9.27
   3   2   5  366.34    9.34
   3  -2  -5  351.13    9.10
   3   2   5  350.20    9.45
   4   2  -5   33.32    1.12
  -4   2   5   34.58    1.49
   4  -2   5   33.81    1.43
  -4  -2  -5   35.73    1.52
   4  -2  -5   31.71    1.54
  -4  -2   5   32.89    1.14
   4  -2  -5   31.02    1.35
  -4   2  -5   34.30    1.58
  -4   2  -5   32.54    1.37
   4   2   5   34.85    1.60
   4   2   5   28.70    1.37
   5   2  -5   88.26    2.53
  -5   2   5   86.83    2.95
  -5  -2  -5   84.80    2.98
   5   2  -5   87.84    3.23
   5  -2   5   87.01    2.96
  -5   2  -5   80.23    2.79
  -5  -2   5   87.32    2.54
   5  -2  -5   80.15    2.78
  -5   2  -5   87.23    3.09
   5   2   5   89.36    3.16
   6  -2   5    2.23    0.57
   6   2  -5    1.97    0.67
  -6  -2  -5    2.74    0.65
  -6   2   5    2.14    0.59
   6   2  -5    2.03    0.44
   6   2   5    2.83    0.64
  -6  -2   5    2.14    0.44
  -6   2  -5    2.05    0.54
   6  -2  -5    1.90    0.62
   7  -2   5    4.55    1.03
  -7  -2  -5    4.00    0.83
   7   2  -5    3.76    0.63
   7   2  -5    4.77    0.90
  -7   2   5    4.61    0.79
   7   2   5    4.85    0.92
  -7  -2   5    4.80    0.61
   7  -2  -5    3.34    0.74
  -7   2  -5    5.11    0.91
   8   2  -5    3.01    0.85
  -8   2   5    2.56    0.78
  -8  -2  -5    3.37    0.82
   8  -2   5    2.74    0.72
   8   2   5    2.20    0.72
  -8  -2   5    3.36    0.66
  -8   2  -5    2.86    0.82
   8  -2  -5    3.15    0.84
  -9  -2  -5    4.19    0.98
  -9   2   5    6.84    1.16
   9   2  -5    7.23    1.31
   9  -2   5    6.86    1.09
   9   2   5    6.09    1.70
  -9   2  -5    6.94    1.20
   9  -2  -5    5.44    1.22
  -9  -2   5    3.73    0.82
  10   2  -5    7.32    1.58
  10  -2   5    5.17    1.20
 -10  -2  -5    5.77    1.17
 -10   2   5    3.81    1.20
  10  -2  -5    4.96    1.34
 -10   2  -5    4.00    1.10
  10   2   5    4.33    1.03
   0   3   5  146.67    4.32
   0   3   5  146.95    4.06
   0  -3  -5  146.29    4.07
   0   3  -5  148.90    4.01
   0   3  -5  151.60    3.91
   0  -3   5  152.99    4.02
   0  -3   5  150.10    3.91
   0  -3  -5  144.92    4.06
   1   3  -5   64.91    2.16
  -1  -3  -5   62.90    2.12
  -1   3   5   67.47    2.18
  -1  -3  -5   67.31    2.12
   1   3  -5   68.07    1.82
   1  -3   5   69.13    1.96
   1  -3   5   66.10    2.07
  -1  -3   5   64.82    1.75
   1  -3  -5   60.55    2.02
  -1   3  -5   66.07    1.87
   1   3   5   62.71    2.02
   1  -3  -5   61.93    2.00
   1  -3  -5   65.81    2.09
   1   3   5   61.75    2.08
  -1   3  -5   61.59    1.99
  -2  -3  -5   42.16    1.53
   2  -3   5   39.81    1.53
   2  -3   5   40.01    1.33
  -2   3   5   38.56    1.55
  -2   3   5   40.05    1.55
   2   3  -5   41.03    1.07
   2   3  -5   40.35    1.09
   2  -3  -5   40.19    1.53
  -2   3  -5   42.32    1.57
  -2   3  -5   40.80    1.32
   2   3   5   40.71    1.60
   2  -3  -5   39.69    1.52
   2   3   5   41.28    1.51
  -3  -3  -5   27.93    1.23
   3   3  -5   27.87    0.75
   3  -3   5   26.29    1.08
   3   3  -5   28.10    0.76
  -3  -3  -5   26.70    1.28
  -3   3   5   27.62    1.27
   3  -3  -5   28.70    1.30
  -3   3  -5   28.77    1.09
   3   3   5   28.34    1.37
   3  -3  -5   26.57    1.40
  -4  -3  -5   64.98    2.29
   4   3  -5   62.37    1.75
   4  -3   5   64.80    2.17
   4   3  -5   64.46    2.47
  -4   3   5   64.93    2.35
   4   3  -5   65.02    1.75
   4   3   5   59.52    2.13
   4   3   5   61.55    2.37
   4  -3  -5   58.53    2.25
   4  -3  -5   56.80    2.11
  -4   3  -5   58.40    1.98
  -4   3  -5   60.65    2.32
  -5   3   5   64.96    2.51
  -5  -3  -5   70.24    2.51
   5   3  -5   67.68    2.76
   5   3  -5   66.45    1.93
   5  -3   5   66.22    2.38
  -5   3  -5   65.83    2.63
  -5  -3   5   68.47    1.98
   5   3   5   70.07    2.74
  -5   3  -5   63.52    2.28
   6   3  -5   39.87    2.15
   6  -3   5   39.91    1.82
  -6   3   5   37.51    1.88
  -6  -3  -5   41.08    1.88
   6   3  -5   38.37    1.37
  -6  -3   5   38.02    1.41
   6  -3  -5   39.65    1.94
   6   3   5   40.84    2.12
  -6   3  -5   41.79    2.05
   7   3  -5   29.99    1.95
   7  -3   5   30.23    1.67
  -7  -3  -5   29.55    2.57
   7   3  -5   27.43    1.23
  -7   3  -5   31.83    1.96
  -7  -3   5   31.53    1.31
   7  -3  -5   31.29    1.80
   7   3   5   29.02    1.91
   8   3  -5    0.60    0.59
  -8  -3  -5   -0.68    0.48
   8  -3   5    0.26    0.45
  -8   3   5    0.51    0.62
  -8  -3   5    0.12    0.51
  -8   3  -5    0.87    0.66
   8   3   5   -0.93    0.49
   8  -3  -5    0.65    0.55
   9  -3   5    1.47    0.76
   9   3  -5    1.60    0.77
  -9  -3  -5    1.20    0.69
  -9   3   5    1.60    0.77
   9  -3  -5    0.58    0.66
  -9   3  -5    2.33    0.79
   9   3   5   -0.12    0.67
 -10  -3  -5   10.71    1.57
 -10   3   5   10.57    1.79
  10   3  -5    8.43    1.71
  10  -3   5    7.64    1.62
  10   3   5    9.38    1.63
  10  -3  -5    8.29    1.59
 -10   3  -5    9.12    1.77
   0  -4  -5    4.33    0.42
   0  -4  -5    4.18    0.41
   0   4   5    3.87    0.40
   0   4   5    4.42    0.42
   0   4  -5    4.72    0.36
   0   4  -5    4.09    0.36
   0  -4   5    4.47    0.35
  -1   4   5   51.48    1.97
   1   4  -5   52.52    1.47
   1  -4   5   50.30    1.55
  -1  -4  -5   50.51    1.77
  -1  -4  -5   51.82    1.80
   1  -4   5   46.75    1.69
  -1   4  -5   49.51    1.50
  -1   4  -5   47.74    1.68
  -1  -4   5   50.20    1.43
   1   4   5   49.44    1.77
   1  -4  -5   47.47    1.73
   1   4   5   49.81    1.71
   1  -4  -5   48.76    1.77
   1  -4  -5   49.28    1.68
   2  -4   5   66.27    1.89
  -2   4   5   65.33    2.19
   2  -4   5   61.65    2.17
  -2  -4  -5   64.87    2.24
  -2   4   5   64.86    2.27
  -2  -4  -5   65.59    2.17
  -2   4  -5   60.23    1.73
   2  -4  -5   60.12    2.08
  -2   4  -5   59.63    2.08
   2   4   5   58.55    1.99
   2   4   5   56.45    2.09
   2  -4  -5   60.60    2.01
   3  -4   5   55.32    1.73
  -3  -4  -5   58.12    1.99
  -3  -4  -5   52.94    2.30
   3  -4   5   53.45    2.46
  -3   4   5   53.50    2.06
   3  -4  -5   55.70    2.05
   3   4   5   56.67    2.18
   3   4   5   54.24    2.18
  -3   4  -5   58.36    2.15
   3  -4  -5   55.33    2.01
  -3   4  -5   55.82    1.72
  -4  -4  -5   25.60    1.26
   4  -4   5   26.18    1.13
  -4   4   5   27.90    1.41
   4   4  -5   28.49    1.50
  -4   4  -5   27.16    1.44
   4  -4  -5   28.37    1.37
   4   4   5   27.49    1.27
  -4   4  -5   25.58    1.08
   4   4   5   25.90    1.45
  -5  -4  -5   49.04    1.97
   5   4  -5   49.59    1.31
   5   4  -5   51.03    3.41
   5  -4   5   46.31    1.82
  -5   4   5   44.80    2.04
   5   4  -5   46.52    1.29
   5   4   5   45.89    2.14
  -5   4  -5   41.58    2.04
   6  -4   5   61.95    2.33
  -6   4   5   60.09    2.54
   6   4  -5   60.37    2.78
   6   4  -5   58.06    1.71
  -6  -4  -5   59.87    2.39
   6  -4  -5   55.85    2.37
  -6   4  -5   63.40    2.73
   6   4   5   58.77    2.69
  -7   4   5    7.96    0.95
  -7  -4  -5   10.80    1.05
   7  -4   5    8.71    0.91
   7   4  -5    9.53    1.20
   7   4  -5    9.10    0.57
   7   4   5   10.04    1.19
   7  -4  -5    9.95    1.02
  -7   4  -5   10.33    1.18
  -8   4   5    9.73    1.22
   8   4  -5    9.18    1.32
   8  -4   5    7.80    0.99
  -8  -4  -5    9.80    1.08
  -8   4  -5    9.77    1.29
   8  -4  -5    8.13    1.14
   8   4   5    8.26    1.25
  -9   4   5    2.82    0.86
  -9  -4  -5    3.45    0.92
   9  -4   5    2.44    0.84
   9   4  -5    3.06    0.94
   9  -4  -5    2.33    0.90
  -9   4  -5    2.83    1.07
   9   4   5    3.49    1.10
  10  -4   5    1.91    0.92
 -10   4   5    4.47    1.78
  10   4  -5    0.33    0.99
 -10  -4  -5    3.74    1.06
 -10   4  -5    2.96    1.06
  10  -4  -5    1.94    1.05
  10   4   5    1.70    1.03
   0  -5  -5   60.87    2.12
   0   5  -5   61.94    1.93
   0   5   5   63.51    2.07
   0   5  -5   59.39    1.88
   0  -5   5   60.00    1.88
   0  -5  -5   59.11    2.00
  -1  -5  -5  408.26   10.27
  -1   5   5  412.46   10.26
  -1  -5  -5  392.14   10.27
   1  -5   5  392.74   10.18
   1   5  -5  406.97    9.88
  -1   5  -5  408.25    9.76
   1   5   5  385.99   10.13
   1   5   5  390.52   10.07
  -1   5  -5  397.45   10.05
   1  -5  -5  386.36   10.14
   1  -5  -5  399.64   10.01
   1  -5  -5  389.65   10.20
  -1  -5   5  404.00    9.70
   2  -5   5   30.49    0.97
   2  -5   5   26.99    1.26
  -2  -5  -5   28.25    1.26
  -2  -5  -5   28.61    1.31
  -2   5   5   28.18    1.37
   2   5  -5   28.58    0.76
  -2   5   5   27.36    1.24
   2   5   5   32.26    1.43
   2   5   5   29.33    1.25
  -2   5  -5   29.98    1.34
   2  -5  -5   27.70    1.20
  -2   5  -5   30.53    0.96
   2  -5  -5   28.59    1.32
   3  -5   5    3.57    0.32
  -3  -5  -5    2.89    0.41
  -3   5   5    4.82    0.58
   3   5  -5    3.91    0.52
  -3   5  -5    3.39    0.28
   3   5   5    3.65    0.45
   3   5   5    3.43    0.53
   3  -5  -5    3.42    0.43
   3  -5  -5    3.64    0.51
  -3   5  -5    3.13    0.47
   4  -5   5   40.99    1.44
  -4  -5  -5   41.18    1.67
   4   5  -5   39.52    1.88
  -4   5   5   37.59    1.81
  -4   5  -5   37.01    1.78
   4   5   5   40.27    1.89
  -4   5  -5   38.06    1.32
   4  -5  -5   36.32    1.62
   4   5   5   37.79    1.60
  -5   5   5  105.04    3.63
   5  -5   5  101.69    3.11
   5   5  -5  103.47    3.77
  -5  -5  -5   98.60    3.32
   5   5   5  102.26    3.75
  -5   5  -5  102.73    4.35
   6   5  -5   15.08    1.37
   6  -5   5   15.90    1.00
  -6  -5  -5   15.48    1.11
  -6   5   5   14.48    1.26
   6   5   5   16.15    1.40
  -6   5  -5   15.29    1.32
   6  -5  -5   15.71    1.13
   7  -5   5   22.44    1.35
  -7   5   5   22.73    1.57
   7   5  -5   22.11    1.75
  -7  -5  -5   25.00    1.49
   7  -5  -5   24.29    1.52
  -7   5  -5   25.09    1.78
   7   5   5   22.43    1.75
  -8   5   5    1.22    0.63
   8   5  -5    0.26    0.62
  -8  -5  -5    0.58    0.56
   8   5   5    0.94    0.70
   8  -5  -5    1.04    0.57
  -8   5  -5    2.09    0.89
   9   5  -5    9.13    1.66
   9  -5   5    8.58    1.21
  -9  -5  -5    8.38    1.24
  -9   5   5    8.57    1.47
   9  -5  -5    7.77    1.27
  -9   5  -5    8.16    1.48
   9   5   5    7.95    1.45
 -10   5   5    4.12    1.26
  10   5  -5    1.00    1.01
  10  -5   5    3.11    0.99
 -10  -5  -5    2.55    1.24
  10   5   5    2.32    1.13
  10  -5  -5    2.75    1.00
 -10   5  -5    3.16    1.11
   0  -6  -5   65.27    2.13
   0   6  -5   59.67    1.98
   0  -6  -5   63.90    2.25
   0  -6   5   60.96    1.98
   0   6  -5   62.96    2.01
   0  -6  -5   63.46    2.22
   0   6   5   66.52    2.17
  -1   6   5   16.87    0.91
  -1  -6  -5   17.86    0.98
   1   6  -5   18.27    0.76
  -1  -6  -5   19.01    1.00
   1  -6   5   18.01    0.93
   1  -6  -5   17.52    0.91
  -1  -6   5   19.17    0.77
  -1   6  -5   19.92    0.76
   1  -6  -5   20.14    1.07
   1  -6  -5   18.37    1.03
   1   6   5   19.02    1.03
  -1   6  -5   20.57    1.01
   2   6  -5  148.13    3.63
  -2   6   5  149.60    4.18
   2  -6   5  138.86    4.24
  -2   6   5  147.07    4.45
   2   6  -5  146.84    4.26
  -2  -6  -5  144.45    4.21
  -2  -6  -5  139.96    4.29
   2  -6  -5  148.16    4.13
   2   6   5  141.41    4.23
   2   6   5  143.74    4.38
  -2   6  -5  147.07    4.33
  -2  -6   5  149.06    3.62
   2  -6  -5  143.43    4.34
  -2   6  -5  148.23    3.92
   3   6  -5    0.85    0.39
   3  -6   5    0.85    0.18
  -3   6   5    0.60    0.29
  -3  -6  -5    1.00    0.33
  -3   6  -5    1.14    0.37
  -3   6  -5    0.76    0.17
   3  -6  -5    0.93    0.31
   3   6   5    0.27    0.22
   3   6   5    0.74    0.32
  -4   6   5    7.86    0.83
  -4  -6  -5   10.45    0.78
   4   6  -5   10.80    0.97
   4  -6   5    9.99    0.55
   4  -6  -5    8.80    0.74
  -4   6  -5    8.77    0.88
   4   6   5    7.82    0.85
   4   6   5    7.32    0.68
   5  -6   5   17.29    0.91
  -5   6   5   17.87    1.30
  -5  -6  -5   17.48    1.10
   5   6  -5   17.83    1.36
  -5   6  -5   16.80    1.33
   5   6   5   16.76    1.33
  -6   6   5   52.09    2.42
   6  -6   5   49.07    1.90
  -6  -6  -5   51.00    2.13
   6   6  -5   47.61    2.52
   6  -6  -5   51.51    2.12
  -6   6  -5   47.45    2.45
   6   6   5   51.20    2.55
  -7   6   5    0.38    0.54
   7   6  -5    1.90    0.77
   7  -6   5    1.02    0.44
  -7  -6  -5    0.49    0.45
  -7   6  -5    0.94    0.71
   7  -6  -5    1.56    1.01
   7   6   5    0.88    0.61
  -8   6   5   15.01    1.51
  -8  -6  -5   13.24    1.21
   8  -6   5   15.51    1.20
   8   6  -5   13.41    1.57
   8  -6  -5   15.95    1.34
   8   6   5   14.33    2.35
  -8   6  -5   13.19    1.51
  -9   6   5    0.59    0.88
   9  -6   5    0.32    0.66
  -9  -6  -5    0.30    0.69
   9   6  -5    0.05    0.75
   9   6   5    0.51    0.80
   9  -6  -5    1.04    0.75
  -9   6  -5   -0.09    0.76
  10   6  -5    2.42    1.15
 -10   6   5    2.66    1.19
 -10   6  -5    1.49    1.08
  10  -6  -5    3.70    1.03
  10   6   5    1.45    1.04
   0  -7  -5   25.41    1.27
   0  -7  -5   25.41    1.27
   0   7  -5   25.09    1.07
   0  -7  -5   25.13    1.16
   0   7  -5   25.32    1.10
   0   7   5   25.57    1.20
   0  -7   5   25.42    1.08
  -1   7   5  285.42    7.33
   1   7  -5  279.31    7.03
   1  -7   5  264.20    7.27
  -1  -7  -5  278.49    7.47
   1   7  -5  280.70    7.25
  -1  -7  -5  284.23    7.43
  -1  -7  -5  257.02    7.33
  -1  -7   5  280.81    7.07
   1  -7  -5  274.18    7.57
   1   7   5  281.56    7.53
  -1   7  -5  284.05    7.00
  -1   7  -5  278.44    7.44
   1  -7  -5  270.20    7.56
   1  -7  -5  283.57    7.32
   2   7  -5   10.13    0.47
  -2   7   5    9.93    0.74
  -2  -7  -5    9.34    0.72
  -2   7   5    9.69    0.87
   2   7  -5    9.66    0.79
   2  -7  -5    8.04    0.59
   2   7   5    8.74    0.76
  -2  -7   5    8.74    0.40
  -2   7  -5    9.04    0.78
   2   7   5    8.56    0.68
  -2   7  -5    8.20    0.29
  -3  -7  -5   11.36    0.80
  -3   7   5   11.47    0.95
   3   7  -5   11.85    0.95
   3  -7  -5   10.04    0.69
  -3   7  -5   10.41    0.89
   3   7   5    9.46    0.88
   3   7   5    9.78    0.72
  -4  -7  -5   11.40    0.84
   4  -7   5   10.57    0.49
  -4   7   5   11.75    1.03
   4   7  -5    9.19    0.97
  -4   7  -5    9.98    0.98
   4  -7  -5   11.65    0.83
   4   7   5   10.98    0.83
   4   7   5    9.20    0.94
   5  -7   5    7.36    0.53
  -5  -7  -5    8.07    0.75
  -5   7   5    8.65    1.01
   5   7  -5    6.19    0.96
   5  -7  -5    7.03    0.79
   5   7   5    7.86    1.01
  -5   7  -5    8.07    0.99
  -6  -7  -5    0.66    0.43
   6  -7   5    0.72    0.35
   6   7  -5    0.19    0.45
  -6   7   5    0.88    0.58
  -6   7  -5   -0.01    0.46
   6   7   5    1.36    0.61
   6  -7  -5   -0.34    0.38
   7   7  -5   27.15    2.08
  -7   7   5   31.83    2.01
  -7  -7  -5   28.59    1.57
   7  -7   5   29.51    1.42
   7   7   5   29.30    2.03
   7  -7  -5   29.95    1.65
  -7   7  -5   28.00    2.00
   8   7  -5    5.57    1.26
   8  -7   5    6.37    0.94
  -8  -7  -5    4.63    0.86
  -8   7   5    5.93    1.23
   8  -7  -5    3.93    0.86
   8   7   5    3.33    1.11
  -8   7  -5    2.00    1.32
   9  -7   5    5.18    1.30
  -9   7   5    6.74    1.49
  -9  -7  -5    6.12    1.18
   9   7  -5    6.82    1.53
   9   7   5    7.54    1.45
   9  -7  -5    5.87    1.17
  -9   7  -5    4.17    1.19
 -10   7   5    2.09    1.24
  10   7  -5   -0.93    0.91
  10  -7  -5    2.14    1.40
 -10   7  -5    0.83    1.17
  10   7   5    0.61    1.71
   0   8   5  272.36    7.35
   0  -8  -5  264.75    7.29
   0   8  -5  279.58    7.25
   0  -8   5  260.06    7.13
   0   8  -5  280.62    7.30
   0  -8  -5  278.82    7.90
   0  -8  -5  279.92    7.52
   1  -8   5   32.60    1.46
   1   8  -5   35.12    1.35
   1   8  -5   35.25    1.46
  -1  -8  -5   35.90    1.59
  -1   8   5   39.96    1.54
  -1  -8  -5   34.53    1.54
  -1  -8  -5   33.87    1.58
  -1   8  -5   33.90    1.17
  -1   8  -5   34.26    1.54
   1  -8  -5   37.22    1.44
  -1   8  -5   34.44    1.14
   1   8   5   36.17    1.61
   1  -8  -5   36.90    1.68
  -1  -8   5   35.93    1.29
  -2   8   5   57.78    2.05
  -2   8   5   55.04    2.34
   2   8  -5   55.81    1.71
  -2  -8  -5   56.29    2.13
   2   8  -5   56.55    2.16
   2  -8  -5   57.84    1.95
  -2   8  -5   53.47    2.18
   2   8   5   53.57    2.06
  -2  -8   5   55.25    1.61
   2   8   5   55.70    2.23
  -3   8   5   67.47    2.76
   3   8  -5   72.39    2.70
  -3  -8  -5   67.55    2.46
  -3   8  -5   66.34    2.61
   3   8   5   61.21    2.31
   3  -8  -5   65.54    2.22
   3   8   5   69.07    2.68
  -4  -8  -5   11.89    0.89
  -4   8   5   12.62    1.22
  -4   8  -5   12.45    1.07
   4  -8  -5   10.90    0.96
   4   8   5   12.72    1.16
  -5   8   5   20.77    1.55
   5   8  -5   23.21    1.62
  -5  -8  -5   21.87    1.26
   5  -8   5   21.09    0.71
   5  -8  -5   20.00    1.22
   5   8   5   20.11    1.53
  -5   8  -5   19.85    1.52
   6  -8   5   10.65    0.66
  -6   8   5   10.64    1.23
  -6  -8  -5   11.94    0.97
   6   8  -5   11.45    1.32
   6   8   5   11.93    1.29
  -6   8  -5   10.74    1.26
   6  -8  -5    9.60    0.85
   7   8  -5    8.17    1.24
   7  -8   5    8.98    0.74
  -7   8   5    7.22    1.23
  -7  -8  -5    9.80    0.97
  -7   8  -5    8.09    1.24
   7   8   5    6.41    1.12
   7  -8  -5    7.07    0.89
  -8   8   5   15.27    1.77
   8  -8   5   14.68    1.07
   8   8  -5   15.95    1.75
  -8  -8  -5   18.86    1.34
   8  -8  -5   14.51    1.31
   8   8   5   13.68    1.65
  -8   8  -5   14.81    1.68
  -9   8   5    4.92    1.30
   9   8  -5    4.95    1.34
  -9  -8  -5    4.99    1.04
   9  -8  -5    4.51    1.02
  -9   8  -5    5.11    1.26
   9   8   5    5.84    1.22
   0  -9   5   17.85    0.95
   0  -9  -5   18.30    1.15
   0   9  -5   19.42    1.04
   0   9   5   19.74    1.07
   0  -9  -5   17.06    0.98
   0   9  -5   17.69    0.89
  -1  -9  -5   33.12    1.57
  -1   9   5   35.80    1.49
   1   9  -5   31.30    1.32
   1   9  -5   31.00    1.41
   1   9   5   31.47    1.52
   1  -9  -5   33.19    1.36
   1  -9  -5   31.48    1.60
  -1  -9   5   31.77    1.22
  -1   9  -5   28.49    1.03
  -1   9  -5   30.60    1.48
  -1   9  -5   30.34    1.08
   2   9  -5   52.58    2.09
  -2   9   5   49.01    2.26
  -2   9   5   49.59    1.90
  -2  -9  -5   50.52    2.04
   2   9  -5   52.56    1.69
  -2  -9   5   49.18    1.53
  -2   9  -5   50.04    2.12
   2  -9  -5   46.27    1.76
   2   9   5   52.21    2.15
  -3   9   5   12.12    1.11
  -3   9   5   13.89    0.87
  -3  -9  -5   13.95    0.96
   3   9  -5   12.82    1.07
  -3   9  -5   10.92    1.00
   3   9   5   11.79    1.02
   3  -9  -5   13.49    0.80
  -4  -9  -5   54.66    2.21
  -4   9   5   60.45    2.71
   4   9  -5   57.98    2.57
   4  -9  -5   50.23    2.35
  -4   9  -5   55.68    2.53
   4   9   5   58.55    2.63
  -5  -9  -5   17.38    1.14
   5   9  -5   14.64    1.38
  -5   9   5   16.66    1.45
  -5   9  -5   17.04    1.45
   5  -9  -5   15.95    1.05
   5   9   5   16.84    1.45
  -6  -9  -5    2.35    0.62
   6   9  -5    1.42    0.67
  -6   9   5    2.34    0.76
   6   9   5    2.72    0.78
   6  -9  -5    1.86    0.48
  -6   9  -5    1.09    0.71
  -7  -9  -5   30.47    1.61
  -7   9   5   28.53    2.13
   7   9  -5   29.98    2.17
   7   9   5   23.51    1.94
  -7   9  -5   30.68    2.14
   7  -9  -5   25.11    1.46
   8   9  -5    1.95    0.97
  -8   9   5    0.60    0.84
  -8  -9  -5    2.07    0.81
  -8   9  -5    1.52    0.90
   8   9   5    1.46    0.90
   8  -9  -5    1.37    0.67
  -9   9   5    1.03    0.96
   9   9  -5    1.05    1.07
   9   9   5    1.65    1.00
  -9   9  -5    2.64    1.07
   9  -9  -5    0.19    0.97
   0  10  -5   82.73    2.53
   0  10  -5   85.27    2.78
   0 -10  -5   83.50    3.00
   0  10   5   81.56    2.81
   0 -10  -5   75.51    2.69
   0 -10   5   78.17    2.64
  -1 -10  -5   35.31    1.69
   1  10  -5   32.68    1.46
  -1  10   5   33.00    1.50
   1  10  -5   34.17    1.43
  -1 -10   5   33.97    1.37
   1 -10  -5   38.49    1.83
  -1  10  -5   32.35    1.18
  -1  10  -5   34.01    1.64
  -1  10  -5   33.50    1.15
   1  10   5   37.66    1.70
   1 -10  -5   34.67    1.46
  -2 -10  -5   18.41    1.16
   2  10  -5   17.28    1.13
   2  10  -5   17.48    1.28
  -2  10   5   17.81    1.03
  -2  10   5   15.68    1.26
   2 -10  -5   17.40    0.93
  -2  10  -5   18.27    1.24
  -2 -10   5   15.40    0.75
   2  10   5   17.09    1.19
  -3 -10  -5  125.75    3.98
   3  10  -5  122.58    4.16
  -3  10   5  126.21    4.42
  -3  10   5  123.23    3.73
   3 -10  -5  116.86    3.54
   3  10   5  122.38    4.65
  -3 -10   5  120.30    3.04
  -3  10  -5  122.81    4.23
  -4  10   5   16.25    1.41
  -4 -10  -5   19.49    1.19
   4  10  -5   19.19    1.45
   4  10   5   18.21    1.43
  -4  10  -5   17.42    1.42
   4 -10  -5   16.93    1.01
  -5  10   5    5.16    1.06
  -5 -10  -5    8.00    0.82
   5  10  -5    5.14    0.97
   5  10   5    6.22    0.99
  -5  10  -5    7.05    1.04
   5 -10  -5    7.32    0.77
  -6 -10  -5    0.38    0.41
  -6  10   5    1.05    0.67
   6  10  -5    1.36    0.63
  -6  10  -5    0.11    0.51
   6 -10  -5    0.11    0.36
   6 -10  -5    0.06    0.56
   6  10   5    1.66    0.74
  -7 -10  -5    4.19    0.80
   7  10  -5    5.41    1.21
  -7  10   5    2.43    0.95
  -7  10  -5    4.45    2.07
   7  10   5    2.62    1.00
   7 -10  -5    3.97    0.82
  -8  10   5   13.19    1.72
   8  10  -5   12.11    1.67
  -8 -10  -5   12.61    1.91
   8 -10  -5   14.27    1.24
   8  10   5   13.44    1.78
  -8  10  -5   11.89    1.57
  -9  10   5   10.27    1.72
   9  10  -5    5.63    1.46
  -9  10  -5    6.77    1.37
   9  10   5    9.79    1.70
   0  11   5   -0.08    0.25
   0  11  -5   -0.03    0.31
   0  11  -5   -0.09    0.25
   0 -11  -5    0.18    0.31
  -1  11   5   11.73    0.85
   1  11  -5   10.38    0.82
  -1 -11  -5    9.65    0.90
   1  11  -5    9.94    0.79
  -1  11  -5    8.45    0.83
   1 -11  -5    8.65    0.73
  -1  11  -5    9.40    0.53
  -1  11  -5    9.02    0.55
  -1 -11   5    9.11    0.69
   1 -11  -5    9.39    0.91
   1  11   5    9.15    0.86
  -2  11   5    4.21    0.76
   2  11  -5    4.48    0.57
  -2  11   5    5.08    0.57
   2  11  -5    4.34    0.69
  -2 -11  -5    3.97    0.68
   2  11   5    4.47    0.69
  -2  11  -5    4.78    0.79
   2 -11  -5    3.44    0.64
  -2 -11   5    4.18    0.44
  -3 -11  -5   14.73    1.09
   3  11  -5   14.97    1.20
  -3  11   5   12.48    1.21
  -3  11   5   13.36    0.88
   3  11   5   12.88    1.19
   3 -11  -5   13.64    0.85
  -3 -11   5   14.51    0.62
  -3  11  -5   13.71    1.23
  -3 -11   5   13.88    0.59
   4  11  -5   79.85    3.34
  -4  11   5   84.86    3.57
  -4 -11  -5   85.93    3.05
   4 -11  -5   77.14    2.55
  -4  11  -5   79.10    3.36
   4  11   5   81.66    3.37
  -5 -11  -5    2.79    0.64
   5  11  -5    2.72    0.78
  -5  11   5    1.77    0.76
   5  11   5    3.31    0.86
  -5  11  -5    2.68    0.70
  -6 -11  -5    1.04    0.51
  -6  11   5    0.75    0.69
   6  11  -5    1.72    0.79
   6 -11  -5    0.58    0.38
   6  11   5    0.69    0.66
  -6  11  -5    0.63    0.63
   7  11  -5    5.37    1.30
  -7  11   5    6.35    1.95
  -7 -11  -5    5.53    0.92
   7 -11  -5    4.62    0.79
   7  11   5    5.75    1.24
  -7  11  -5    7.96    1.32
  -8  11   5   13.43    1.79
   8  11  -5   15.38    1.98
  -8 -11  -5   15.35    1.31
   8  11   5   17.11    1.89
  -8  11  -5   14.34    1.89
  -9  11   5    1.08    1.24
  -9  11  -5    2.70    1.16
   9  11   5   -0.79    1.56
   0  12  -5   30.07    1.34
   0  12  -5   32.86    1.64
   0 -12  -5   35.28    1.85
   0  12   5   31.74    1.60
   1  12  -5   44.84    1.87
  -1  12   5   44.93    1.89
   1  12  -5   44.85    1.88
  -1 -12  -5   44.22    2.09
   1 -12  -5   44.99    1.81
  -1  12  -5   44.52    1.44
  -1  12  -5   45.12    2.08
   1  12   5   44.67    2.06
  -1 -12   5   42.20    1.72
   1 -12  -5   44.29    2.20
  -1  12  -5   42.51    1.45
  -2  12   5    1.64    0.58
  -2 -12  -5    2.53    0.62
  -2  12   5    2.59    0.52
   2  12  -5    2.99    0.65
  -2  12  -5    2.38    0.67
  -2 -12   5    2.03    0.43
   2 -12  -5    1.99    0.44
   2  12   5    3.03    0.74
  -3  12   5   81.79    3.54
   3  12  -5   84.23    3.26
  -3  12   5   82.83    2.72
  -3 -12  -5   81.91    3.05
   3  12   5   85.30    3.36
  -3 -12   5   77.07    2.28
   3 -12  -5   80.61    2.61
  -3  12  -5   83.63    3.37
  -3 -12   5   82.18    2.34
  -4  12   5    4.90    1.00
  -4 -12  -5    3.62    0.71
   4  12  -5    4.44    0.88
  -4  12  -5    3.74    0.94
   4  12   5    5.43    0.92
   4 -12  -5    3.69    0.58
  -5 -12  -5   12.97    1.09
  -5  12   5   10.72    1.29
   5  12  -5   12.49    1.40
   5 -12  -5   13.68    0.90
   5  12   5   12.46    1.37
  -5  12  -5   14.98    1.48
  -6 -12  -5    4.17    0.80
   6  12  -5    3.52    1.11
  -6  12   5    1.97    0.78
   6 -12  -5    2.91    0.53
  -6  12  -5    1.87    0.88
   6  12   5    3.96    1.07
   7  12  -5    0.05    0.72
  -7 -12  -5    1.55    0.60
  -7  12   5    0.92    0.85
   7  12   5    0.25    0.77
  -7  12  -5    0.00    0.69
   7 -12  -5    0.53    0.51
  -8  12   5    8.73    1.64
   8  12  -5    3.66    1.31
  -8  12  -5    4.51    1.23
   8  12   5    5.87    1.40
  -9  12   5    3.42    1.33
   9  12  -5    3.75    1.15
  -9  12  -5    1.12    1.14
   9  12   5    4.21    1.44
   0 -13  -5    1.82    0.65
   0  13   5    1.75    0.47
   0  13  -5    1.46    0.41
   0  13  -5    2.52    0.66
  -1  13   5    5.68    0.69
  -1 -13  -5    7.99    1.08
   1  13  -5    5.78    0.75
   1  13  -5    7.11    0.80
  -1  13  -5    4.91    0.49
  -1  13  -5    6.01    0.48
   1 -13  -5    4.39    0.81
   1  13   5    7.83    0.88
  -1  13  -5    7.29    0.93
   1 -13  -5    6.66    0.91
  -2  13   5   28.24    1.42
  -2 -13  -5   26.87    1.61
   2  13  -5   30.14    1.64
  -2  13   5   26.83    1.89
  -2 -13   5   29.17    1.35
   2  13   5   29.38    1.73
   2 -13  -5   27.40    1.32
  -2  13  -5   28.06    1.74
  -2 -13   5   26.55    1.25
   3  13  -5   46.08    2.31
  -3  13   5   49.53    2.66
  -3  13   5   50.01    1.87
  -3 -13  -5   48.09    2.23
   3 -13  -5   43.39    1.68
   3  13   5   45.50    2.34
  -3 -13   5   46.89    1.76
  -3  13  -5   46.76    2.39
  -3 -13   5   44.05    1.91
  -4 -13  -5   59.53    2.52
  -4  13   5   62.69    3.15
   4  13  -5   61.11    2.88
   4  13   5   58.36    2.88
  -4  13  -5   55.36    2.84
   4 -13  -5   56.02    1.92
   5  13  -5   17.76    1.62
  -5  13   5   19.41    1.81
  -5 -13  -5   21.07    1.37
   5  13   5   21.30    1.78
  -5  13  -5   17.69    1.70
   5 -13  -5   19.99    0.98
  -6 -13  -5    3.66    0.81
   6  13  -5    2.00    1.02
  -6  13   5    2.25    1.00
   6  13   5    2.82    1.00
  -6  13  -5    2.82    0.96
  -7  13   5    1.37    0.94
   7  13  -5    2.03    0.88
  -7 -13  -5    4.84    0.99
  -7  13  -5    2.49    1.08
   7  13   5    2.60    1.03
   8  13  -5    3.56    1.30
  -8  13   5    3.01    1.17
  -8  13  -5    5.24    1.32
   8  13   5    4.00    1.24
   0  14  -5    1.60    0.55
   0  14   5    1.22    0.51
   0 -14  -5    0.50    0.41
   0  14  -5    1.64    0.46
   1  14  -5    2.80    0.68
   1  14  -5    1.74    0.52
  -1 -14  -5    2.47    0.67
  -1  14   5    2.90    0.64
   1 -14  -5    4.28    0.88
  -1  14  -5    2.24    0.46
   1  14   5    3.91    0.76
  -1  14  -5    2.17    0.40
  -1  14  -5    1.80    0.62
  -2 -14  -5   19.79    1.40
   2  14  -5   18.07    1.33
  -2  14   5   19.07    1.64
  -2  14   5   17.23    1.16
   2 -14  -5   17.22    1.05
  -2  14  -5   20.34    1.53
  -2 -14   5   16.81    1.02
   2  14   5   17.36    1.41
  -2 -14   5   18.12    1.11
  -3 -14  -5   30.09    2.63
  -3  14   5   26.28    1.99
   3  14  -5   28.93    1.79
  -3  14   5   28.32    1.30
   3 -14  -5   27.09    1.26
   3  14   5   30.85    1.92
  -3 -14   5   28.69    1.21
  -3 -14   5   26.99    1.13
  -3  14  -5   26.50    1.87
   4  14  -5   16.41    1.48
  -4  14   5   16.80    1.66
  -4 -14  -5   14.82    1.47
   4 -14  -5   16.92    0.89
  -4  14  -5   15.33    1.52
   4  14   5   15.61    1.48
  -5  14   5   26.61    2.19
   5  14  -5   21.90    1.88
  -5 -14  -5   27.18    1.72
   5 -14  -5   23.13    0.86
  -5  14  -5   26.83    2.03
   5  14   5   22.44    1.90
  -6  14   5    7.64    1.45
  -6 -14  -5    6.38    1.04
   6  14  -5    8.21    1.38
  -6  14  -5    8.71    1.41
   6  14   5    6.11    1.27
  -7 -14  -5    0.90    0.73
  -7  14   5    1.49    1.06
   7  14  -5    0.50    0.87
   7  14   5    1.19    0.87
  -7  14  -5    0.47    0.84
   8  14  -5    1.81    1.26
  -8  14   5    1.14    1.24
  -8  14  -5    0.67    1.13
   8  14   5    1.53    1.12
   0 -15  -5   17.01    1.45
   0  15   5   12.00    1.06
   0  15  -5   13.66    1.26
   0  15  -5   13.88    0.95
  -1  15   5   27.79    1.51
   1  15  -5   25.37    1.60
   1  15  -5   27.14    1.50
  -1 -15  -5   23.12    1.68
  -1  15  -5   27.21    1.01
  -1  15  -5   23.83    1.03
   1 -15  -5   24.60    1.80
  -1  15  -5   27.17    1.76
   1  15   5   22.45    1.61
  -2 -15  -5   62.11    2.76
   2  15  -5   60.86    2.62
  -2  15   5   60.48    2.30
  -2  15   5   59.65    3.11
   2 -15  -5   60.41    2.24
  -2  15  -5   59.57    2.89
   2  15   5   59.73    2.75
  -2 -15   5   63.65    2.38
   3  15  -5   13.96    1.32
  -3  15   5   15.09    1.56
  -3 -15  -5   12.03    1.13
  -3  15  -5   14.26    1.41
   3  15   5   13.07    1.29
  -3 -15   5    9.82    0.81
   3 -15  -5   11.79    0.86
  -3 -15   5   12.46    0.81
  -4  15   5   19.11    1.83
   4  15  -5   19.34    1.65
  -4 -15  -5   21.11    1.49
   4 -15  -5   16.06    1.04
  -4  15  -5   21.62    1.86
   4  15   5   17.77    1.64
  -5 -15  -5   38.78    1.98
   5  15  -5   36.61    2.42
  -5  15   5   42.48    2.88
  -5  15  -5   40.63    2.69
  -6 -15  -5    6.24    1.19
   6  15  -5    4.45    1.12
  -6  15   5    5.51    1.25
  -6  15  -5    6.61    1.50
   6  15   5    6.53    1.47
   7  15  -5    2.58    1.07
  -7  15   5    1.25    1.29
   7  15   5    1.51    1.04
  -7  15  -5    1.93    1.13
   8  15  -5    0.58    1.09
   8  15   5    1.03    1.06
   0  16  -5    0.27    0.41
   0 -16  -5    0.37    0.66
   0  16  -5   -0.20    0.46
   0  16   5    0.33    0.47
  -1  16   5    3.43    0.74
   1  16  -5    2.53    0.75
   1  16  -5    1.67    0.61
  -1 -16  -5    3.92    0.93
  -1  16  -5    2.49    0.51
  -1  16  -5    2.92    0.44
   1  16   5    1.80    0.64
  -1  16  -5    3.00    0.79
   1 -16  -5    3.40    0.89
   2  16  -5   49.35    2.37
  -2  16   5   47.55    1.99
  -2 -16  -5   52.70    2.56
  -2  16  -5   51.98    2.73
   2  16   5   51.61    2.57
   2 -16  -5   46.24    1.97
  -2 -16   5   49.99    2.15
   2 -16  -5   53.39    2.89
  -3 -16  -5   15.30    1.39
   3  16  -5   13.95    1.32
  -3  16   5   17.51    1.76
   3  16   5   12.11    1.37
  -3  16  -5   16.80    1.59
  -3 -16   5   14.98    1.00
   4  16  -5    3.23    0.97
  -4  16   5    4.41    1.08
  -4 -16  -5    4.30    0.94
   4  16   5    3.83    1.04
  -4  16  -5    2.35    1.36
  -5 -16  -5    5.71    1.07
   5  16  -5    4.20    1.02
  -5  16   5    5.47    1.30
   5  16   5    5.32    1.18
  -5  16  -5    3.61    1.09
  -6  16   5   32.38    2.61
   6  16  -5   26.92    2.37
  -6 -16  -5   29.68    1.81
  -6  16  -5   33.67    2.60
   6  16   5   31.38    2.49
  -7  16   5    0.22    1.21
   7  16  -5    3.46    1.17
  -7  16  -5    0.38    1.02
   7  16   5   -0.01    0.98
   0  17  -5    0.61    0.68
   0  17  -5    0.29    0.42
   0  17   5   -0.38    0.62
   0 -17  -5    0.37    0.61
   1  17  -5   18.43    1.32
   1  17  -5   20.90    1.60
  -1  17   5   20.45    1.36
  -1 -17  -5   21.21    1.68
   1  17   5   21.60    1.55
   1 -17  -5   19.66    1.77
  -1  17  -5   18.88    0.76
  -1  17  -5   22.28    1.76
  -1  17  -5   17.19    0.87
  -2 -17  -5    2.86    0.77
   2  17  -5    1.49    0.72
  -2  17   5    2.35    0.60
  -2 -17   5    2.52    0.75
  -2  17  -5    2.49    0.77
   2  17   5    3.03    0.99
   2 -17  -5    1.93    0.92
   3  17  -5    2.33    0.75
  -3 -17  -5    3.76    0.88
  -3  17   5    2.92    1.05
   3  17   5    2.39    0.87
   3 -17  -5    2.47    1.19
  -3  17  -5    2.84    0.93
  -3 -17   5    2.32    0.60
   4  17  -5    5.41    1.19
  -4  17   5    3.57    1.03
  -4 -17  -5    4.76    0.97
  -4  17  -5    3.87    1.04
   4  17   5    5.43    1.49
  -5 -17  -5   32.09    1.94
  -5  17   5   33.12    2.60
   5  17  -5   31.45    2.36
   5  17   5   37.48    2.60
  -5  17  -5   36.15    2.59
   6  17  -5   -0.84    0.90
  -6 -17  -5    0.57    1.08
  -6  17   5    0.34    1.06
  -6  17  -5    1.02    1.00
   6  17   5    0.35    0.88
  -7  17   5    2.89    1.35
   7  17  -5   -0.51    1.57
  -7  17  -5    2.89    1.32
   7  17   5    1.46    1.14
   0  18   5   18.97    1.47
   0 -18  -5   15.19    1.59
   0  18  -5   16.38    1.58
   0  18  -5   16.77    1.09
   1  18  -5    0.55    0.60
  -1  18   5    2.14    0.74
  -1 -18  -5    1.03    0.71
  -1 -18   5    1.22    0.81
  -1  18  -5    1.61    0.82
   1  18   5    1.43    0.82
   1 -18  -5    0.43    0.65
  -2  18   5   13.03    1.09
   2  18  -5    9.45    1.30
  -2 -18  -5   12.76    1.47
  -2  18  -5   15.38    1.63
   2  18   5   10.93    1.41
   2 -18  -5    9.85    1.73
  -2 -18   5   12.56    1.29
  -3 -18  -5   -0.87    0.65
   3  18  -5    0.53    0.64
  -3 -18   5    1.05    0.65
   3 -18  -5    0.30    0.77
   3  18   5    0.16    0.68
  -3  18  -5   -0.31    0.69
   4  18  -5    1.17    0.87
  -4  18   5    1.49    1.06
  -4 -18  -5    1.68    0.86
   4  18   5    2.33    0.82
  -4  18  -5    2.24    0.91
  -5  18   5   -1.11    1.07
   5  18  -5    0.92    0.96
  -5 -18  -5    0.84    0.89
   5  18   5    1.27    0.99
  -5  18  -5   -0.60    0.93
  -6  18   5   16.86    2.51
   6  18  -5   17.48    2.01
   6  18   5   15.41    2.04
  -6  18  -5   14.08    2.12
   0 -19  -5    3.01    0.95
   0  19   5    1.02    0.75
   0  19  -5    0.27    0.77
   0  19  -5    0.39    0.58
  -1  19   5    6.61    1.16
  -1 -19  -5    9.72    1.36
   1  19  -5    6.73    1.18
  -1  19  -5    5.83    1.25
   1 -19  -5    7.14    1.43
  -1 -19   5    5.62    1.13
   1  19   5    5.22    1.16
   2  19  -5    2.27    0.83
  -2  19   5    1.55    0.71
  -2 -19  -5    2.66    0.94
   2 -19  -5    2.06    1.17
  -2  19  -5    0.54    1.04
   2  19   5    2.76    0.99
  -2 -19   5    1.20    0.72
   3  19  -5    6.87    1.34
  -3 -19  -5    7.47    1.32
   3 -19  -5    6.08    1.42
  -3  19  -5    6.43    1.42
  -3 -19   5    4.28    0.95
   3  19   5    4.65    1.43
   4  19  -5    1.91    0.97
  -4 -19  -5    1.86    0.93
   4 -19  -5    1.74    1.06
  -4  19  -5    1.75    0.96
   4  19   5   -0.02    0.81
   5  19  -5    7.65    1.56
  -5  19   5    5.42    1.62
  -5 -19  -5    7.31    1.37
   5  19   5    7.98    1.70
  -5  19  -5    7.77    1.66
   0  20   5   25.09    1.84
   0  20  -5   29.15    2.18
   0  20  -5   21.44    1.62
   0 -20  -5   28.96    2.29
  -1  20   5    0.47    0.89
   1  20  -5    0.53    0.81
  -1  20  -5    0.87    1.68
   1 -20  -5    1.38    0.96
   1  20   5    2.05    0.92
  -1 -20   5    1.53    0.92
   2  20  -5    7.86    1.29
  -2 -20  -5    9.23    1.56
   2  20   5   11.80    1.55
   2 -20  -5   10.24    1.78
  -2  20  -5   10.34    1.56
  -2 -20   5    6.47    1.42
  -3 -20  -5    7.72    1.57
   3  20  -5    9.21    1.52
   3 -20  -5   11.14    1.79
  -3  20  -5    8.17    1.72
   3  20   5    6.75    1.45
   4  20  -5    5.74    1.35
  -4 -20  -5    7.71    1.60
   4 -20  -5    9.77    1.97
  -4  20  -5   10.43    1.86
   4  20   5    9.91    1.75
   5  20  -5    0.91    1.13
   5 -20  -5    0.72    1.03
  -5  20  -5    2.78    1.20
   5  20   5    3.02    1.24
   0 -21  -5    0.24    0.95
   0 -21   5    2.30    1.01
   0  21   5    1.35    1.02
   1  21  -5   11.15    1.49
  -1 -21  -5   11.59    1.78
  -1 -21   5   16.34    1.71
  -1  21  -5   13.53    1.84
   1 -21  -5   16.93    2.00
   1  21   5   14.37    1.75
  -2 -21  -5    1.85    1.12
   2  21  -5    2.96    1.03
   2  21   5    4.81    1.93
  -2  21  -5    3.49    1.13
  -2 -21   5    4.10    1.21
   2 -21  -5    3.10    1.22
  -3 -21  -5    3.85    1.47
   3  21  -5    1.57    1.07
   3  21   5    1.95    1.10
   3 -21  -5    4.37    1.50
  -3  21  -5    2.66    1.16
  -4 -21  -5    9.48    1.75
   4  21  -5   12.08    1.98
   4 -21  -5    8.89    1.86
  -4  21  -5   14.28    2.70
   4  21   5   11.04    1.95
   0 -22  -5    9.85    1.86
   0 -22   5    7.46    1.62
  -1 -22  -5    4.50    1.44
  -1  22  -5    6.12    1.56
   1  22   5    1.70    1.30
  -1 -22   5    1.88    1.33
   1 -22  -5    6.76    1.65
   2  22  -5    2.53    1.38
  -2 -22  -5    8.28    1.72
   2 -22  -5    6.01    1.57
   2  22   5    8.07    1.81
  -2  22  -5    5.55    1.71
   0   0   6   42.41    1.43
   0   0   6   44.68    1.58
   0   0  -6   39.47    1.47
   0   0  -6   43.65    1.44
   1   0   6   14.60    0.76
   1   0  -6   17.30    0.74
  -1   0   6   17.26    0.89
   1   0  -6   17.53    0.88
  -1   0  -6   16.79    0.81
  -1   0  -6   16.11    0.79
  -1   0   6   17.51    0.74
   2   0  -6   80.06    2.34
  -2   0  -6   83.38    2.56
  -2   0  -6   79.69    2.50
   2   0  -6   82.64    2.38
   2   0   6   82.78    2.55
   2   0   6   78.77    2.53
   2   0  -6   81.44    2.69
  -3   0  -6   32.80    1.42
  -3   0  -6   34.72    1.47
   3   0   6   33.70    1.43
   3   0  -6   33.78    1.23
   3   0  -6   33.61    1.25
   3   0  -6   36.03    1.61
  -4   0   6    0.60    0.27
   4   0  -6    1.01    0.26
  -4   0  -6    1.21    0.35
   4   0   6    1.08    0.33
  -4   0  -6    1.81    0.48
   5   0  -6   22.56    1.09
  -5   0   6   24.28    1.17
  -5   0  -6   25.90    1.41
   5   0   6   25.29    1.41
  -6   0   6   17.28    1.04
   6   0  -6   16.80    1.02
   6   0  -6   20.57    1.40
   6   0   6   18.37    1.31
  -6   0  -6   18.43    1.68
  -7   0   6   46.64    2.04
  -7   0  -6   51.68    2.41
   7   0   6   52.61    2.46
   7   0  -6   45.14    2.41
   8   0   6    7.19    1.03
   8   0  -6    6.51    1.10
  -8   0   6    6.97    0.93
  -8   0  -6    5.86    1.08
  -9   0   6    1.75    0.95
   9   0   6    1.99    0.84
   9   0  -6    3.86    1.08
  -9   0  -6    2.86    0.93
 -10   0  -6    1.79    0.92
  10   0   6   -0.62    0.78
  10   0  -6    1.72    0.99
   0  -1   6  317.91    7.98
   0  -1  -6  314.62    7.95
   0   1   6  322.05    8.32
   0   1  -6  307.73    7.95
   0   1  -6  311.05    7.83
   0   1   6  300.35    7.87
   0  -1   6  303.07    7.81
  -1   1   6  194.37    5.17
   1  -1   6  180.62    4.99
  -1  -1  -6  190.61    5.06
  -1   1   6  187.32    4.96
   1  -1   6  197.24    5.04
   1   1  -6  192.44    4.85
  -1  -1  -6  176.25    5.02
   1   1  -6  187.46    5.15
   1  -1  -6  186.67    4.88
   1   1   6  180.55    4.93
  -1  -1   6  179.16    4.75
   1  -1  -6  183.16    5.03
   1   1   6  188.33    5.02
  -1   1  -6  190.35    4.95
  -1   1  -6  186.35    4.91
   2  -1   6    3.58    0.41
   2   1  -6    4.09    0.31
   2  -1   6    3.29    0.36
  -2  -1  -6    4.08    0.43
  -2  -1  -6    3.87    0.42
   2   1  -6    3.86    0.47
   2   1  -6    3.95    0.31
   2  -1  -6    2.58    0.33
  -2   1  -6    2.82    0.33
   2  -1  -6    2.46    0.35
  -2   1  -6    2.89    0.37
   2   1   6    2.69    0.39
   2   1   6    2.33    0.33
   2  -1  -6    3.01    0.41
   3  -1   6   42.97    1.72
  -3  -1  -6   43.47    1.71
   3   1  -6   44.26    1.42
  -3  -1  -6   45.58    1.73
   3   1  -6   45.04    1.43
   3   1  -6   42.03    1.83
  -3   1   6   46.59    1.66
   3  -1   6   41.09    1.63
   3  -1  -6   44.64    1.84
  -3   1  -6   43.31    1.61
   3   1   6   46.20    1.77
   3   1   6   41.26    1.66
  -3   1  -6   42.74    1.71
   3  -1  -6   42.70    1.55
  -4   1   6   24.27    1.16
   4   1  -6   23.32    0.96
  -4  -1  -6   25.12    1.28
   4  -1   6   25.15    1.25
  -4   1  -6   23.73    1.20
  -4   1  -6   26.07    1.35
   4  -1  -6   26.20    1.18
   4   1   6   28.25    1.42
   5  -1   6   34.04    1.65
  -5  -1  -6   34.32    1.66
  -5   1   6   36.48    1.55
   5   1  -6   34.75    1.33
  -5  -1   6   36.26    1.41
  -5   1  -6   37.42    1.78
   5   1   6   37.78    1.82
   5  -1  -6   32.78    1.46
   6   1  -6   18.26    1.39
  -6  -1  -6   20.80    1.33
   6  -1   6   20.36    1.31
  -6   1   6   19.44    1.18
  -6   1  -6   19.49    1.37
   6  -1  -6   18.06    1.35
  -6  -1   6   19.35    1.04
   7   1  -6    6.21    0.73
   7  -1   6    7.06    0.91
  -7  -1  -6    8.19    0.99
   7   1  -6    9.47    1.16
  -7   1   6    7.24    0.87
   7   1   6    6.01    0.97
  -7  -1   6    7.72    0.79
  -7   1  -6    6.63    0.99
   7  -1  -6    8.69    1.11
   8   1  -6   18.24    1.66
  -8  -1  -6   16.31    1.41
   8  -1   6   15.05    1.36
  -8   1   6   19.06    1.36
   8   1   6   14.87    1.45
   8  -1  -6   18.24    1.56
  -8  -1   6   17.01    1.18
  -8   1  -6   15.45    1.49
   9  -1   6    1.76    0.74
   9   1  -6    0.45    0.71
  -9  -1  -6    2.20    0.86
  -9   1   6    2.09    0.80
   9   1   6    1.74    0.81
  -9   1  -6    0.62    0.77
  -9  -1   6    2.45    0.75
  10  -1   6   -0.33    0.82
 -10  -1  -6    1.90    1.00
 -10   1   6    1.16    1.08
  10   1  -6    2.82    1.12
  10  -1  -6   -0.31    0.91
  10   1   6   -0.30    0.85
 -10   1  -6    1.14    0.99
   0  -2  -6  131.18    3.78
   0  -2   6  138.73    3.78
   0  -2   6  132.36    3.63
   0   2  -6  135.79    3.64
   0  -2  -6  139.55    3.79
   0   2  -6  134.05    3.75
   1  -2   6  288.86    7.64
  -1  -2  -6  308.87    7.74
   1   2  -6  299.67    7.42
  -1  -2  -6  292.93    7.72
   1   2  -6  293.43    7.80
  -1   2   6  292.72    7.65
  -1   2   6  307.31    7.83
   1  -2   6  306.63    7.64
  -1   2  -6  295.04    7.60
  -1   2  -6  290.98    7.52
   1   2   6  304.61    7.73
   1  -2  -6  297.90    7.70
  -1  -2   6  296.99    7.38
   1  -2  -6  303.51    7.61
   1   2   6  286.23    7.62
  -2   2   6   99.31    3.07
   2   2  -6   92.58    3.13
   2  -2   6   95.81    2.82
   2   2  -6   97.52    2.61
   2   2  -6   97.11    2.57
  -2  -2  -6   97.73    2.97
  -2  -2  -6   91.67    2.95
   2  -2   6  103.65    3.17
  -2   2  -6   93.01    2.64
   2  -2  -6   90.77    2.85
   2  -2  -6   89.36    2.70
  -2   2  -6   91.30    2.80
   2  -2  -6   92.10    2.74
   2   2   6   88.35    2.83
   2   2   6   84.31    2.72
   3   2  -6    6.57    0.35
   3  -2   6    5.70    0.51
   3  -2   6    6.23    0.61
  -3   2   6    5.78    0.57
  -3  -2  -6    6.01    0.59
   3   2  -6    5.47    0.35
  -3  -2  -6    5.45    0.55
   3  -2  -6    6.04    0.52
  -3   2  -6    6.46    0.52
   3  -2  -6    5.84    0.61
   3   2   6    5.09    0.57
   3   2   6    5.58    0.55
  -3   2  -6    6.37    0.62
   4   2  -6   77.88    2.22
  -4  -2  -6   81.94    2.73
  -4   2   6   78.45    2.64
   4  -2   6   78.02    2.60
   4   2  -6   75.41    2.20
  -4   2  -6   81.53    2.82
   4   2   6   81.35    2.85
  -4   2  -6   75.31    2.54
   4  -2  -6   77.17    2.57
   5   2  -6   42.45    2.03
   5   2  -6   38.91    1.38
  -5   2   6   42.84    1.81
  -5  -2  -6   41.36    1.85
   5  -2   6   41.17    1.79
  -5   2  -6   42.16    1.97
   5   2   6   44.11    2.06
   5  -2  -6   40.99    1.93
   6   2  -6   20.03    0.96
   6  -2   6   22.13    1.35
  -6  -2  -6   21.15    1.35
   6   2  -6   20.61    1.53
  -6   2   6   21.91    1.31
  -6  -2   6   22.73    1.09
   6   2   6   22.83    1.52
  -6   2  -6   23.07    1.48
   7   2  -6   63.99    3.00
  -7   2   6   63.80    2.63
   7  -2   6   63.69    2.72
  -7  -2  -6   66.01    2.75
  -7  -2   6   61.26    2.18
   7   2   6   60.78    2.88
  -7   2  -6   64.84    2.85
   7  -2  -6   63.03    2.79
   8   2  -6   24.04    1.90
  -8   2   6   23.74    1.63
   8  -2   6   27.07    1.72
  -8  -2  -6   26.19    1.75
   8   2   6   26.12    1.87
   8  -2  -6   28.38    1.86
  -8   2  -6   25.23    1.84
   9   2  -6    0.60    0.81
  -9  -2  -6    1.19    0.78
  -9   2   6    2.34    0.91
   9  -2   6    0.51    0.68
  -9   2  -6    0.51    0.77
   9   2   6    0.23    0.68
   9  -2  -6    1.20    0.71
 -10   2   6    1.35    1.25
 -10  -2  -6    1.66    1.07
  10   2  -6    1.49    0.99
  10  -2   6    1.37    0.90
 -10   2  -6    2.45    1.19
  10  -2  -6    2.83    1.09
  10   2   6    3.17    1.10
   0  -3  -6  230.32    6.05
   0   3  -6  232.76    5.86
   0   3  -6  222.87    5.97
   0   3   6  225.03    6.02
   0  -3   6  233.55    6.00
   0  -3   6  227.71    5.86
   0   3   6  233.41    6.11
   0  -3  -6  217.31    6.01
  -1   3   6  478.74   12.03
   1  -3   6  484.65   11.80
  -1  -3  -6  489.44   11.99
  -1  -3  -6  467.58   11.99
   1   3  -6  481.14   11.61
   1  -3   6  467.58   11.89
   1   3  -6  462.38   12.02
  -1   3  -6  484.82   11.84
   1   3   6  462.12   11.88
   1  -3  -6  465.10   11.90
  -1  -3   6  475.70   11.56
  -1   3  -6  464.57   11.70
   1  -3  -6  481.03   11.97
   1   3   6  482.22   11.99
   2  -3   6   68.85    2.10
   2  -3   6   66.87    2.29
  -2   3   6   70.81    2.39
  -2  -3  -6   70.04    2.31
   2   3  -6   69.97    1.84
  -2  -3  -6   66.19    2.31
  -2   3  -6   65.57    2.00
   2  -3  -6   66.80    2.22
   2   3   6   64.48    2.19
   2   3   6   66.37    2.30
   2  -3  -6   65.80    2.19
   2  -3  -6   68.24    2.26
  -2   3  -6   64.80    2.23
   3  -3   6  142.57    3.94
   3   3  -6  142.00    3.51
  -3  -3  -6  147.20    4.17
   3   3  -6  140.20    3.50
   3  -3   6  138.47    4.52
  -3  -3  -6  134.30    4.18
  -3   3   6  141.79    4.19
   3  -3  -6  143.88    4.23
   3   3   6  129.52    4.03
  -3   3  -6  137.16    3.87
   3   3   6  145.21    4.29
   3  -3  -6  141.90    4.09
  -3   3  -6  144.38    4.22
  -4   3   6    2.48    0.45
  -4  -3  -6    2.87    0.47
   4   3  -6    2.69    0.23
   4  -3   6    3.22    0.44
   4   3  -6    2.73    0.27
  -4   3  -6    3.33    0.53
   4  -3  -6    3.60    0.63
   4   3   6    3.90    0.59
  -4   3  -6    3.93    0.46
   4  -3  -6    3.41    0.51
  -5   3   6   20.86    1.27
   5  -3   6   19.42    1.14
  -5  -3  -6   20.06    1.22
   5   3  -6   19.76    0.75
   5   3  -6   20.34    1.50
   5   3  -6   19.55    0.77
  -5   3  -6   20.25    1.33
   5   3   6   20.56    1.36
  -5   3  -6   18.07    1.07
   6   3  -6   77.50    3.23
   6  -3   6   80.47    2.87
  -6  -3  -6   78.66    2.94
   6   3  -6   75.38    2.24
  -6   3   6   73.42    2.89
  -6   3  -6   80.28    3.17
   6   3   6   78.80    3.22
   6  -3  -6   77.71    3.00
  -7  -3  -6    2.31    0.61
   7  -3   6    2.34    0.68
   7   3  -6    2.56    0.46
   7   3  -6    2.91    0.83
   7   3   6    1.82    0.73
   7  -3  -6    1.70    0.62
  -7   3  -6    3.76    0.87
   8   3  -6   11.05    0.76
  -8  -3  -6   11.45    1.19
   8   3  -6    8.94    1.32
  -8   3   6    8.92    1.10
   8  -3   6   11.01    1.17
  -8   3  -6    9.08    1.26
   8   3   6    8.79    1.26
   8  -3  -6    9.43    1.18
   9  -3   6   10.90    1.32
  -9  -3  -6    9.96    1.29
  -9   3   6   12.98    1.48
   9   3  -6   14.28    1.69
   9   3   6   11.55    1.46
  -9   3  -6    7.94    1.62
   9  -3  -6   10.66    1.36
  10  -3   6    3.62    1.84
 -10  -3  -6    2.05    1.06
  10   3  -6    1.58    1.03
 -10   3   6    4.36    1.34
  10   3   6    7.05    1.47
 -10   3  -6    3.51    1.24
  10  -3  -6    1.44    0.98
   0   4  -6    8.88    0.58
   0  -4   6   10.15    0.56
   0  -4  -6    8.73    0.63
   0   4   6    7.37    0.58
   0   4  -6    9.02    0.53
   0  -4  -6    8.54    0.61
   0   4   6    8.45    0.64
  -1  -4  -6  350.13    9.34
   1  -4   6  356.44    9.24
   1  -4   6  373.95    9.10
  -1   4   6  375.22    9.39
   1   4  -6  351.41    9.36
   1   4  -6  368.62    8.94
   1  -4  -6  343.45    9.18
   1   4   6  369.53    9.34
  -1   4  -6  367.19    9.18
   1  -4  -6  357.77    9.30
   1  -4  -6  355.29    9.26
  -1  -4   6  362.39    8.85
  -1   4  -6  360.27    8.97
   1   4   6  355.10    9.22
  -2   4   6   54.35    2.07
   2   4  -6   54.97    1.47
   2  -4   6   54.10    1.99
  -2  -4  -6   59.03    2.02
   2  -4   6   55.74    1.74
  -2   4   6   55.90    2.03
  -2  -4  -6   53.47    2.01
   2  -4  -6   53.91    1.96
   2   4   6   54.88    2.04
  -2   4  -6   54.84    1.68
  -2  -4   6   53.66    1.44
   2  -4  -6   53.62    1.93
  -2   4  -6   53.42    1.96
   2  -4  -6   54.22    1.99
  -3   4   6    5.68    0.63
   3  -4   6    5.85    0.46
  -3  -4  -6    6.40    0.58
  -3   4  -6    5.28    0.42
  -3   4  -6    5.57    0.61
   3  -4  -6    5.67    0.57
   3   4   6    4.76    0.52
   3   4   6    5.36    0.63
   3  -4  -6    4.80    0.54
   4   4  -6   15.31    1.10
   4  -4   6   13.65    0.79
  -4  -4  -6   14.25    0.93
  -4   4   6   14.19    1.00
   4   4   6   13.74    1.07
  -4   4  -6   15.34    0.81
  -4   4  -6   15.71    1.09
   4  -4  -6   15.75    1.03
  -5  -4  -6   30.64    1.56
   5   4  -6   35.61    1.88
  -5   4   6   33.06    1.71
   5  -4   6   30.99    1.43
   5   4   6   27.43    1.97
  -5   4  -6   30.05    1.99
  -5   4  -6   27.11    1.27
   6   4  -6   13.28    0.48
   6   4  -6   12.87    1.29
  -6  -4  -6   12.22    1.03
  -6   4   6   14.62    1.21
   6   4  -6   13.83    0.57
   6  -4   6   12.12    0.98
   6   4   6   13.44    1.30
   6  -4  -6   15.18    1.15
  -6   4  -6   13.34    1.23
  -7   4   6    2.97    0.84
   7   4  -6    3.07    0.83
   7   4  -6    2.89    0.30
  -7  -4  -6    3.87    0.80
   7  -4   6    1.81    0.54
   7   4   6    2.56    0.76
   7  -4  -6    2.63    0.72
  -7   4  -6    2.23    0.78
  -8   4   6    6.03    1.10
  -8  -4  -6    5.18    0.96
   8  -4   6    4.87    0.90
   8   4  -6    6.84    1.18
   8   4   6    4.04    0.97
   8  -4  -6    4.39    0.97
  -8   4  -6    4.79    1.01
   9  -4   6    9.67    1.26
  -9  -4  -6   11.42    1.36
   9   4  -6   10.64    1.55
  -9   4   6   12.23    1.50
  -9   4  -6   13.25    1.62
   9   4   6    9.69    1.43
   9  -4  -6   11.24    1.41
 -10   4   6   10.74    2.20
  10  -4   6    9.35    1.50
  10   4  -6   14.12    1.93
 -10  -4  -6    9.28    1.68
 -10   4  -6   10.23    1.77
  10   4   6   10.04    1.66
  10  -4  -6    8.09    1.52
   0  -5   6   27.33    1.08
   0   5  -6   26.47    1.08
   0  -5  -6   29.06    1.24
   0   5   6   28.56    1.26
   0   5  -6   27.59    1.13
   0  -5  -6   26.91    1.24
   1   5  -6  195.72    5.37
  -1  -5  -6  183.29    5.35
  -1  -5  -6  195.90    5.38
   1  -5   6  192.49    5.27
   1  -5   6  196.21    5.06
   1   5  -6  192.48    4.95
  -1   5   6  199.01    5.38
  -1   5  -6  189.41    5.08
   1  -5  -6  183.79    5.20
  -1  -5   6  185.29    4.74
   1  -5  -6  184.43    5.18
   1  -5  -6  174.60    5.02
  -1   5  -6  189.19    4.83
   1   5   6  182.69    5.20
  -2   5   6   41.66    1.63
   2  -5   6   38.78    1.28
  -2   5   6   37.27    1.68
  -2  -5  -6   34.27    1.57
   2  -5   6   37.44    1.57
   2   5  -6   37.88    1.06
  -2  -5  -6   39.79    1.59
   2  -5  -6   35.73    1.46
   2   5   6   38.34    1.64
  -2  -5   6   38.18    1.03
  -2   5  -6   37.27    1.21
  -2   5  -6   35.59    1.54
   2  -5  -6   37.32    1.59
   2   5   6   34.68    1.49
  -3  -5  -6   23.91    1.19
   3  -5   6   22.73    0.92
  -3   5   6   23.11    1.29
   3  -5  -6   24.98    1.24
  -3   5  -6   24.60    0.93
   3   5   6   23.57    1.18
  -3   5  -6   24.56    1.31
   3   5   6   27.35    1.41
   4  -5   6   11.96    0.69
   4   5  -6   10.76    0.96
  -4  -5  -6   10.64    0.84
  -4   5   6   11.50    0.96
  -4   5  -6    9.70    0.61
   4   5   6   11.65    1.00
   4  -5  -6   11.10    0.84
  -4   5  -6   13.11    1.03
  -5  -5  -6   86.47    3.01
   5  -5   6   87.97    2.77
   5   5  -6   83.71    3.35
  -5   5   6   82.59    3.17
  -5   5  -6   84.53    3.24
   5   5   6   85.38    3.33
  -6  -5  -6   16.00    1.15
   6  -5   6   15.62    1.02
   6   5  -6   13.78    1.37
  -6   5   6   13.51    1.23
   6   5   6   17.73    1.47
  -6   5  -6   15.99    1.38
   7   5  -6    0.77    0.56
   7  -5   6    0.92    0.46
  -7  -5  -6    0.07    0.39
  -7   5   6   -0.03    0.53
   7   5   6    0.62    0.59
  -7   5  -6    0.57    0.52
   7  -5  -6    0.67    0.55
  -8  -5  -6    1.10    0.67
   8  -5   6    0.57    0.68
  -8   5   6    0.94    0.67
   8   5  -6    3.39    1.53
   8   5   6    1.46    0.70
   8  -5  -6    1.35    0.64
  -8   5  -6    0.84    0.69
   9   5  -6   23.85    2.10
  -9   5   6   24.43    1.98
  -9  -5  -6   22.05    1.72
   9  -5   6   21.09    1.67
  -9   5  -6   27.83    2.17
   9  -5  -6   19.03    1.70
   9   5   6   24.98    2.16
 -10  -5  -6    0.45    1.11
 -10   5   6    1.73    1.20
  10   5  -6    1.22    1.15
 -10   5  -6    2.81    1.24
  10   5   6    2.90    0.97
   0   6  -6    0.74    0.25
   0   6   6    1.49    0.40
   0  -6   6    1.35    0.28
   0   6  -6    1.22    0.27
   0  -6  -6    1.36    0.36
   0  -6  -6    2.08    0.39
   0  -6  -6    1.43    0.36
  -1  -6  -6   78.96    2.67
  -1   6   6   81.14    2.66
   1   6  -6   80.35    2.32
   1  -6   6   82.24    2.60
  -1  -6  -6   80.72    2.69
   1  -6  -6   78.62    2.57
  -1   6  -6   81.80    2.61
  -1   6  -6   79.00    2.33
   1   6   6   82.08    2.74
   1   6   6   79.97    2.65
   1  -6  -6   80.08    2.73
  -1  -6   6   79.77    2.30
   1  -6  -6   81.45    2.74
   2   6  -6  180.22    4.48
   2  -6   6  186.84    4.64
  -2   6   6  183.53    5.37
  -2   6   6  179.90    5.11
   2  -6   6  163.65    5.36
  -2  -6  -6  184.93    5.15
   2  -6  -6  178.04    5.02
  -2   6  -6  188.60    5.22
  -2   6  -6  181.07    4.59
   2   6   6  174.65    5.08
   2   6   6  179.65    5.26
   3   6  -6   21.15    1.23
  -3   6   6   18.60    1.22
  -3  -6  -6   20.47    1.12
   3  -6   6   21.03    0.80
  -3   6  -6   18.87    0.73
   3  -6  -6   18.59    1.05
  -3   6  -6   22.30    1.26
   3   6   6   19.22    1.07
   3   6   6   20.39    1.24
   4   6  -6    3.79    0.67
   4  -6   6    4.44    0.40
  -4   6   6    4.35    0.68
  -4  -6  -6    3.93    0.55
  -4   6  -6    5.17    0.73
   4   6   6    4.13    0.70
   4  -6  -6    4.10    0.58
  -4   6  -6    3.33    0.35
   5   6  -6    3.20    0.77
   5  -6   6    2.62    0.46
  -5   6   6    3.63    0.73
  -5  -6  -6    4.57    0.67
  -5   6  -6    4.33    0.80
   5   6   6    3.98    0.78
   6  -6   6    7.48    0.72
   6   6  -6    8.00    1.15
  -6  -6  -6    7.75    0.87
  -6   6   6    7.68    1.04
  -6   6  -6    6.75    1.02
   6   6   6    7.93    1.09
   7  -6   6    2.18    0.53
  -7  -6  -6    2.55    0.68
   7   6  -6    2.30    0.82
  -7   6   6    2.27    0.70
  -7   6  -6    3.05    0.83
   7   6   6    3.70    0.86
   7  -6  -6    2.86    0.71
   8   6  -6    3.16    1.00
  -8   6   6    2.83    0.79
   8  -6   6    4.01    0.77
  -8  -6  -6    3.89    0.87
   8  -6  -6    2.84    0.86
   8   6   6    2.69    0.96
  -8   6  -6    2.55    0.91
   9  -6   6    4.13    0.95
  -9  -6  -6    2.05    0.83
  -9   6   6    4.87    1.36
   9   6  -6    5.88    1.46
  -9   6  -6    1.18    0.77
   9   6   6    2.59    1.01
   9  -6  -6    2.38    0.89
  10   6  -6    9.02    2.63
 -10   6   6   11.47    2.04
 -10   6  -6    5.82    1.57
  10  -6  -6    7.22    1.59
  10   6   6   11.27    1.73
   0   7  -6   13.93    0.78
   0  -7  -6   11.02    0.83
   0  -7  -6   10.81    0.83
   0   7   6   13.36    0.86
   0   7  -6   11.71    0.70
   0  -7   6   11.61    0.70
   0  -7  -6   13.28    0.83
  -1  -7  -6   37.30    1.61
  -1   7   6   35.98    1.52
   1   7  -6   35.89    1.28
   1  -7   6   34.77    1.46
  -1  -7  -6   33.88    1.51
   1  -7  -6   35.81    1.63
  -1   7  -6   37.94    1.54
   1  -7  -6   33.57    1.45
  -1   7  -6   36.02    1.25
   1   7   6   38.61    1.66
   1   7   6   34.76    1.53
  -1  -7   6   36.25    1.27
  -2  -7  -6   24.81    1.25
   2   7  -6   22.49    0.82
  -2   7   6   23.05    1.21
   2   7  -6   25.07    1.25
  -2   7   6   25.22    1.42
  -2  -7   6   24.39    0.78
   2   7   6   21.91    1.17
  -2   7  -6   22.87    0.77
   2  -7  -6   22.50    1.10
   2   7   6   23.10    1.29
  -2   7  -6   21.03    1.21
  -3   7   6   91.02    3.31
  -3   7   6   92.29    3.02
  -3  -7  -6   89.47    3.04
   3   7  -6   89.82    3.20
   3  -7   6   93.03    2.40
  -3   7  -6   92.66    2.48
   3   7   6   89.06    3.21
   3  -7  -6   83.72    2.87
  -3   7  -6   85.24    3.11
  -4   7   6   25.08    1.55
   4   7  -6   24.00    1.55
  -4  -7  -6   28.14    1.42
   4  -7   6   27.37    0.96
   4  -7  -6   25.70    1.34
   4   7   6   26.62    2.39
  -5   7   6   53.69    2.53
  -5  -7  -6   59.98    2.31
   5   7  -6   56.40    2.63
   5  -7   6   55.77    1.81
  -5   7  -6   49.79    2.42
   5   7   6   52.60    2.54
  -6   7   6   29.80    1.90
  -6  -7  -6   31.79    1.65
   6   7  -6   30.90    2.01
   6  -7   6   31.65    1.33
  -6   7  -6   31.76    1.97
   6   7   6   29.69    1.99
  -7  -7  -6    2.58    0.73
   7   7  -6    2.37    0.78
   7  -7   6    2.62    0.57
  -7   7   6    2.84    0.79
   7   7   6    4.33    1.04
  -7   7  -6    3.72    1.04
   7  -7  -6    4.07    0.80
  -8  -7  -6    7.80    1.00
   8   7  -6    6.88    1.31
  -8   7   6    5.98    1.27
   8  -7   6    6.47    0.96
  -8   7  -6    4.15    1.06
   8  -7  -6    5.90    1.12
   8   7   6    9.07    1.37
  -9  -7  -6   23.88    1.76
  -9   7   6   24.40    2.15
   9   7  -6   29.91    2.50
   9  -7  -6   23.96    1.82
  -9   7  -6   26.56    2.24
   9   7   6   22.62    2.12
  10   7  -6    1.39    1.03
  10  -7  -6    6.09    1.41
  10   7   6    5.63    1.69
 -10   7  -6    5.08    1.38
   0   8  -6   14.93    0.82
   0  -8   6   14.18    0.93
   0   8   6   15.08    0.96
   0   8  -6   15.74    0.88
   0  -8  -6   15.13    1.01
   0  -8  -6   14.21    0.92
  -1   8   6  156.90    4.63
   1   8  -6  155.60    4.31
  -1  -8  -6  166.06    4.77
   1   8  -6  159.69    4.51
   1  -8   6  151.49    4.54
   1  -8  -6  156.21    4.81
  -1   8  -6  157.44    4.21
  -1  -8   6  153.36    4.26
   1   8   6  163.73    4.80
  -1   8  -6  165.73    4.67
   1  -8  -6  155.03    4.56
   2   8  -6  125.76    3.91
  -2   8   6  123.99    3.84
  -2  -8  -6  129.27    3.97
  -2   8   6  123.27    4.18
   2   8  -6  124.27    3.35
  -2  -8   6  118.56    3.13
   2  -8  -6  108.54    3.96
  -2   8  -6  118.02    2.99
  -2   8  -6  126.88    3.89
   2   8   6  121.18    3.91
  -3  -8  -6   25.06    1.33
  -3   8   6   25.00    1.53
   3   8  -6   23.88    1.42
  -3   8   6   23.80    1.25
  -3   8  -6   24.44    1.44
   3  -8  -6   23.14    1.18
   3   8   6   24.52    1.48
  -4  -8  -6   63.94    2.42
   4   8  -6   62.26    2.69
  -4   8   6   61.08    3.17
   4  -8  -6   61.78    2.30
  -4   8  -6   60.87    2.65
   4   8   6   64.46    2.75
  -5   8   6    2.16    0.71
   5  -8   6    1.46    0.28
  -5  -8  -6    2.20    0.53
   5   8  -6    2.57    0.79
  -5   8  -6    1.20    0.66
   5   8   6    1.55    0.64
  -6   8   6   15.19    1.43
   6  -8   6   16.12    0.80
  -6  -8  -6   18.15    1.22
   6   8  -6   17.18    1.57
  -6   8  -6   15.31    1.46
   6   8   6   16.67    1.54
   7   8  -6   12.11    1.42
  -7  -8  -6   10.73    1.06
  -7   8   6   11.71    1.43
   7  -8   6   11.37    0.82
   7  -8  -6   10.20    1.14
   7   8   6   12.51    1.45
  -7   8  -6   12.23    1.41
  -8   8   6   25.80    2.06
   8  -8   6   23.62    1.30
  -8  -8  -6   24.14    1.63
   8   8  -6   26.33    2.21
   8   8   6   27.91    2.20
  -8   8  -6   25.89    2.12
   8  -8  -6   25.34    1.68
  -9   8   6    2.14    1.06
  -9  -8  -6    1.70    0.90
   9   8  -6    4.73    1.29
  -9   8  -6    3.18    1.17
   9   8   6    2.01    0.95
   9  -8  -6    2.79    0.89
   0  -9  -6  143.27    4.48
   0   9  -6  140.22    4.06
   0  -9  -6  139.59    4.24
   0   9  -6  145.95    4.01
   0   9   6  143.45    4.34
   0   9  -6  148.44    4.23
   0  -9   6  137.58    4.10
   1   9  -6  111.03    3.40
  -1  -9  -6  107.05    3.59
  -1   9   6  109.29    3.48
   1   9  -6  108.16    3.22
  -1   9  -6  109.92    2.97
  -1   9  -6  113.93    3.55
  -1   9  -6  106.40    3.02
   1  -9  -6  112.12    3.71
   1   9   6  109.55    3.61
   1  -9  -6  103.77    3.34
  -1  -9   6  105.25    3.13
   2   9  -6   12.27    0.66
  -2  -9  -6   14.72    1.02
   2   9  -6   11.18    0.90
  -2   9   6   11.96    0.86
  -2   9   6   12.21    1.07
  -2  -9   6   10.85    0.55
   2   9   6   11.02    0.93
  -2   9  -6   10.17    0.91
   2  -9  -6   11.27    0.77
  -3   9   6   94.93    3.78
   3   9  -6  106.02    3.63
  -3   9   6  104.95    3.33
  -3  -9  -6  101.21    3.42
   3   9   6  105.45    3.71
   3  -9  -6   95.93    3.16
  -3   9  -6  105.15    3.67
  -4  -9  -6    9.64    0.90
   4   9  -6   10.57    1.08
  -4   9   6   10.17    1.15
   4   9   6    8.78    1.04
  -4   9  -6   10.98    1.11
   4  -9  -6    8.62    0.79
   5   9  -6   15.67    1.38
  -5   9   6   14.93    1.40
  -5  -9  -6   18.55    1.21
  -5   9  -6   15.94    1.41
   5   9   6   16.77    1.41
   6   9  -6    8.92    1.17
  -6   9   6    7.88    1.20
  -6  -9  -6    8.12    0.88
  -6   9  -6   10.56    1.27
   6   9   6    7.07    1.12
   7   9  -6    7.42    1.62
  -7  -9  -6    6.37    0.93
  -7   9   6    6.47    1.35
   7  -9  -6    5.93    0.88
  -7   9  -6    5.69    1.22
   7   9   6    8.31    1.41
  -8  -9  -6    7.55    1.11
   8   9  -6    9.92    1.59
  -8   9   6    9.55    1.55
  -8   9  -6    6.66    1.44
   8   9   6   10.82    1.53
   8  -9  -6    8.23    1.17
  -9   9   6    4.93    1.45
   9   9  -6    8.33    1.67
  -9  -9  -6    5.69    1.14
  -9   9  -6    4.58    1.21
   9   9   6    4.48    1.20
   9  -9  -6    6.81    1.30
   0  10  -6   42.90    1.67
   0 -10   6   43.84    1.76
   0  10  -6   43.91    1.83
   0  10  -6   46.91    1.68
   0  10   6   47.52    1.96
   0 -10  -6   45.84    2.07
  -1 -10  -6   64.21    2.47
   1  10  -6   59.40    2.19
  -1  10   6   55.72    2.22
   1  10  -6   58.74    2.09
   1  10   6   58.01    2.34
   1 -10  -6   57.19    2.13
   1 -10  -6   57.90    2.45
  -1  10  -6   57.53    1.76
  -1  10  -6   56.03    1.80
  -1  10  -6   58.03    2.28
  -1 -10   6   56.44    1.95
  -2 -10  -6   14.41    1.06
  -2  10   6   14.09    0.97
  -2  10   6   12.72    1.16
   2  10  -6   14.21    0.82
   2  10  -6   14.99    1.06
   2  10   6   15.16    1.15
   2 -10  -6   14.33    0.92
  -2 -10   6   14.26    0.70
  -2  10  -6   16.36    1.17
  -3  10   6    6.27    0.71
  -3  10   6    7.17    0.95
  -3 -10  -6    6.51    0.76
   3  10  -6    6.14    0.80
   3  10   6    5.11    0.79
   3 -10  -6    5.41    0.63
  -3  10  -6    7.07    0.92
  -4 -10  -6   18.83    1.25
  -4  10   6   20.22    1.54
   4  10  -6   21.60    1.53
   4  10   6   21.06    1.53
  -4  10  -6   20.41    1.52
   4 -10  -6   20.68    1.16
  -5  10   6    0.35    0.43
  -5 -10  -6    1.50    0.55
   5  10  -6    0.34    0.40
   5 -10  -6    0.57    0.46
   5  10   6    0.25    0.42
  -5  10  -6    0.29    0.52
  -6 -10  -6    3.45    0.72
  -6  10   6    3.42    1.00
   6  10  -6    4.62    1.02
   6 -10  -6    3.72    0.67
   6  10   6    3.94    0.98
  -6  10  -6    4.24    0.98
  -7  10   6   24.31    2.03
   7  10  -6   26.68    2.19
  -7 -10  -6   25.60    1.57
   7 -10  -6   25.94    1.48
   7  10   6   27.34    2.17
  -7  10  -6   26.89    2.15
   8  10  -6    9.15    1.56
  -8  10   6   10.53    1.66
  -8 -10  -6   11.76    1.30
  -8  10  -6    8.00    1.48
   8  10   6   10.37    1.62
   8 -10  -6    8.65    1.19
   9  10  -6    1.72    1.13
  -9  10   6    1.19    1.12
  -9  10  -6    1.07    1.12
   9  10   6    3.24    1.25
   0  11  -6  195.11    5.24
   0  11  -6  174.66    5.22
   0 -11  -6  192.29    5.86
   0  11   6  195.40    5.65
   0  11  -6  196.04    5.55
  -1  11   6   12.44    0.93
  -1 -11  -6   10.57    1.00
   1  11  -6   14.58    0.94
   1  11  -6   13.09    0.91
  -1  11  -6   12.94    0.64
  -1  11  -6   12.56    0.68
  -1  11  -6   13.26    1.07
   1 -11  -6   15.49    1.22
   1  11   6   13.75    1.06
  -1 -11   6   12.52    0.81
   1 -11  -6   12.10    0.89
  -2  11   6   11.12    0.85
  -2  11   6   11.06    1.18
   2  11  -6   11.21    0.77
  -2 -11  -6   11.38    1.00
   2  11  -6   10.89    0.94
  -2 -11   6    9.66    0.62
   2  11   6    9.57    0.94
   2 -11  -6    9.03    0.74
  -2  11  -6    8.40    0.94
  -3  11   6    4.79    1.10
  -3  11   6    2.91    0.58
  -3 -11  -6    3.62    0.67
   3  11   6    1.69    0.60
  -3  11  -6    1.50    0.60
   3 -11  -6    3.17    0.57
  -3 -11   6    2.64    0.27
   4  11  -6   12.15    1.25
  -4  11   6   13.21    1.43
  -4 -11  -6   13.79    1.10
   4  11   6   14.20    1.33
  -4  11  -6   10.15    1.21
   4 -11  -6   11.79    0.90
  -5  11   6    7.47    1.22
  -5 -11  -6    4.31    0.78
   5  11  -6    5.75    1.05
   5  11   6    3.76    0.87
  -5  11  -6    5.39    1.03
   5 -11  -6    5.47    0.80
  -6  11   6    6.43    1.23
   6  11  -6    6.54    1.16
  -6 -11  -6    7.62    0.96
   6  11   6    7.60    1.27
  -6  11  -6    6.61    1.25
   6 -11  -6    7.71    0.82
  -7 -11  -6    4.47    0.94
   7  11  -6    6.07    1.34
  -7  11   6    6.82    1.36
  -7  11  -6    3.81    1.00
   7  11   6    2.45    0.87
   7 -11  -6    3.33    0.74
  -8 -11  -6    8.21    1.24
   8  11  -6    7.89    1.63
  -8  11   6    9.77    1.69
  -8  11  -6    6.93    1.44
   8  11   6    8.47    1.50
   9  11  -6   -0.41    0.92
  -9  11   6   -0.19    1.24
  -9  11  -6    0.08    1.09
   9  11   6    0.37    1.10
   0  12  -6    7.66    0.67
   0  12  -6    7.51    0.84
   0  12   6    7.42    0.79
  -1 -12  -6   83.18    3.22
  -1  12   6   83.30    2.99
   1  12  -6   89.24    2.95
   1  12  -6   84.08    2.91
  -1 -12   6   76.65    2.64
  -1  12  -6   82.30    2.37
   1  12   6   82.27    3.12
  -1  12  -6   80.66    2.39
   1 -12  -6   85.39    3.31
  -1  12  -6   78.76    3.02
  -2 -12  -6    1.43    0.45
   2  12  -6    1.07    0.44
  -2  12   6    0.87    0.43
  -2  12   6    0.67    0.39
   2  12  -6    1.44    0.42
   2  12   6    0.93    0.59
   2 -12  -6    1.17    0.44
  -2  12  -6    0.54    0.43
  -2 -12   6    0.92    0.33
   2 -12  -6   -0.08    0.36
  -3  12   6    1.17    0.46
  -3 -12  -6    1.88    0.61
  -3  12   6    0.79    0.59
   3  12  -6    0.66    0.47
   3  12   6    1.29    0.59
  -3 -12   6    1.11    0.25
  -3  12  -6    1.53    0.69
   3 -12  -6    1.47    0.43
  -3 -12   6    1.10    0.28
  -4  12   6    1.37    0.68
   4  12  -6    0.40    0.55
  -4 -12  -6    1.29    0.55
  -4  12  -6    1.42    0.65
   4  12   6    1.86    0.66
   4 -12  -6    1.24    0.44
  -5 -12  -6   20.88    1.41
  -5  12   6   21.17    1.86
   5  12  -6   20.44    1.73
   5 -12  -6   16.73    1.09
   5  12   6   15.11    1.56
  -5  12  -6   17.88    1.64
  -6 -12  -6    0.58    0.83
  -6  12   6    1.06    0.79
   6  12  -6    1.83    0.82
   6 -12  -6    0.86    0.44
   6  12   6    1.59    0.97
   7  12  -6   39.34    2.76
  -7  12   6   40.40    2.78
  -7 -12  -6   41.16    2.00
  -7  12  -6   38.60    2.65
   7  12   6   38.46    2.69
   7 -12  -6   39.62    1.70
   8  12  -6    8.04    1.70
  -8 -12  -6    6.79    1.28
  -8  12   6    8.96    1.81
   8  12   6   12.39    1.70
  -8  12  -6    7.55    1.62
   0  13  -6   87.60    3.02
   0  13   6   99.63    3.46
   0  13  -6  102.33    3.49
   0 -13  -6  101.72    3.76
   0  13  -6   96.30    3.03
  -1  13   6   18.36    1.22
   1  13  -6   18.08    1.19
  -1 -13  -6   18.80    1.39
   1  13  -6   19.17    1.23
  -1  13  -6   18.66    0.86
   1  13   6   20.85    1.40
  -1  13  -6   17.94    0.82
  -1  13  -6   21.57    1.63
   1 -13  -6   19.30    1.48
   2  13  -6   26.94    1.39
   2  13  -6   27.51    1.58
  -2 -13  -6   29.13    2.01
  -2  13   6   28.83    1.47
  -2  13  -6   26.51    1.67
   2 -13  -6   24.59    1.75
  -2 -13   6   24.26    1.17
   2 -13  -6   24.15    1.30
   2  13   6   26.01    1.66
  -3 -13  -6    9.81    1.57
   3  13  -6    8.64    1.04
  -3  13   6    8.71    1.23
  -3  13   6   10.96    0.89
  -3 -13   6    9.47    0.70
  -3 -13   6   10.26    0.61
  -3  13  -6    8.93    1.18
   3  13   6    9.98    1.12
   3 -13  -6   10.23    0.84
   4  13  -6    7.98    1.12
  -4  13   6    5.96    1.14
   4  13   6    7.26    1.09
  -4  13  -6    6.58    1.05
   4 -13  -6    7.00    0.85
  -5  13   6    0.20    0.74
   5  13  -6    0.61    0.60
  -5 -13  -6    1.83    0.68
   5  13   6    1.51    0.74
  -5  13  -6    0.36    0.60
   6  13  -6   40.64    2.62
  -6 -13  -6   39.39    1.94
  -6  13   6   34.77    2.59
  -6  13  -6   35.24    2.42
   6  13   6   39.71    2.62
   6 -13  -6   36.16    1.49
  -7 -13  -6    1.65    0.77
   7  13  -6    1.14    0.96
  -7  13   6    1.55    1.03
  -7  13  -6    1.59    0.93
   7  13   6    0.86    0.94
  -8  13   6   10.05    1.99
   8  13  -6    8.55    1.85
  -8  13  -6    7.35    1.63
   8  13   6   11.59    1.76
   0  14  -6    1.40    0.51
   0  14  -6    1.43    0.42
   0 -14  -6    0.95    0.46
   0  14   6    1.15    0.50
   0  14  -6    0.68    0.48
  -1  14   6   74.26    2.86
  -1 -14  -6   75.48    3.13
   1  14  -6   73.37    2.75
   1  14  -6   80.37    2.93
  -1  14  -6   75.77    2.23
  -1  14  -6   71.73    2.25
   1 -14  -6   79.58    3.38
  -1  14  -6   78.55    3.15
   2  14  -6    6.70    0.96
  -2 -14  -6    6.60    0.90
  -2  14   6    6.99    0.85
  -2  14  -6    9.00    1.06
  -2 -14   6    8.22    0.80
   2  14   6    7.53    0.99
   2 -14  -6    8.31    1.09
  -3  14   6   10.90    0.91
  -3  14   6   10.25    1.36
   3  14  -6   10.93    1.12
  -3 -14  -6   12.75    1.15
   3 -14  -6   10.40    0.91
   3  14   6   11.18    1.24
  -3 -14   6    9.94    0.68
  -3  14  -6   11.87    1.27
   4  14  -6    2.52    0.74
  -4  14   6    2.84    0.97
  -4 -14  -6    1.90    0.68
   4  14   6    3.39    0.87
  -4  14  -6    3.39    0.82
   4 -14  -6    2.19    0.77
  -5 -14  -6   22.12    1.54
   5  14  -6   20.21    1.84
  -5  14   6   23.24    2.57
  -5  14  -6   21.40    2.71
   5  14   6   19.87    1.86
  -6  14   6    3.63    1.02
   6  14  -6    4.92    1.19
  -6 -14  -6    3.26    0.82
  -6  14  -6    4.50    1.28
   6  14   6    3.40    0.87
  -7  14   6   13.62    1.85
  -7 -14  -6   12.30    1.34
   7  14  -6    9.56    1.69
   7  14   6   13.47    1.74
  -7  14  -6   10.48    1.68
   8  14  -6    3.46    2.60
  -8  14   6    1.92    1.24
   8  14   6    3.55    1.59
  -8  14  -6    4.16    2.97
   0  15   6   16.66    1.25
   0  15  -6   13.77    1.01
   0  15  -6   17.25    1.39
   0 -15  -6   15.06    1.39
   0  15  -6   15.77    0.98
  -1  15   6    6.69    0.86
   1  15  -6    6.41    0.82
  -1 -15  -6    9.16    1.11
   1  15  -6    8.56    0.94
  -1  15  -6    6.07    0.55
   1 -15  -6    9.45    1.20
  -1  15  -6    8.35    1.05
  -1  15  -6    7.58    0.54
   1  15   6    6.95    0.93
   2  15  -6   15.28    1.28
  -2  15   6   16.06    1.18
  -2 -15  -6   15.81    1.33
  -2 -15   6   15.32    1.09
   2  15   6   15.16    1.41
  -2  15  -6   17.00    1.51
   2 -15  -6   13.61    1.49
  -3  15   6    2.38    0.55
   3  15  -6    1.56    0.64
  -3 -15  -6    3.18    0.77
  -3  15   6    3.12    0.83
   3 -15  -6    2.36    0.76
  -3 -15   6    1.77    0.43
   3 -15  -6    2.91    0.63
  -3  15  -6    4.51    0.92
   3  15   6    3.09    0.80
  -4  15   6    2.16    0.76
  -4 -15  -6    3.43    0.80
   4  15  -6    2.32    0.77
   4  15   6    2.10    0.80
  -4  15  -6    1.36    0.81
   5  15  -6    9.74    1.45
  -5 -15  -6    9.59    1.14
  -5  15   6    7.58    1.54
  -5  15  -6   11.52    1.58
   5  15   6   11.12    1.47
  -6 -15  -6   28.55    1.80
  -6  15   6   32.27    2.62
   6  15  -6   27.83    2.37
   6  15   6   26.66    2.34
  -6  15  -6   29.16    2.38
  -7  15   6    0.70    1.06
   7  15  -6    0.85    0.99
   7  15   6    0.55    0.85
  -7  15  -6    0.85    0.89
   0  16  -6    2.83    0.78
   0  16   6    2.07    0.89
   0  16  -6    2.51    0.52
   0 -16  -6    2.42    0.80
   0  16  -6    2.80    0.67
  -1 -16  -6    2.28    0.68
   1  16  -6    1.21    0.68
  -1  16   6    3.07    0.70
   1  16  -6    2.80    0.61
  -1  16  -6    1.82    0.35
   1 -16  -6    2.49    0.86
   1  16   6    1.41    0.62
  -1  16  -6    2.07    0.41
  -1  16  -6    2.29    0.78
   2  16  -6   32.24    1.89
  -2 -16  -6   36.45    2.11
  -2  16   6   35.76    1.74
   2 -16  -6   39.00    2.49
  -2  16  -6   35.37    2.21
   2  16   6   36.05    2.11
  -2 -16   6   33.72    1.68
  -3 -16  -6    3.89    0.91
   3  16  -6    3.78    0.89
   3  16   6    1.93    0.77
   3 -16  -6    1.89    0.90
  -3 -16   6    3.58    0.77
  -3  16  -6    5.27    1.06
  -4  16   6    0.78    0.79
   4  16  -6    1.14    0.74
  -4 -16  -6    1.96    0.78
   4  16   6    1.60    0.84
  -4  16  -6    0.82    0.92
   5  16  -6    2.65    0.92
  -5 -16  -6    1.20    0.73
  -5  16   6    1.24    0.93
   5  16   6    0.43    0.78
  -5  16  -6    0.51    0.95
   6  16  -6    2.58    1.00
  -6  16   6    7.97    1.70
  -6 -16  -6    3.84    1.04
   6  16   6    7.69    1.50
  -6  16  -6    5.46    1.31
   7  16  -6    1.17    0.97
  -7  16   6    9.57    1.99
   7  16   6    1.76    1.05
  -7  16  -6    1.32    1.16
   0  17  -6    0.38    0.58
   0  17  -6    0.00    0.40
   0 -17  -6    0.49    0.63
   0  17   6   -0.05    0.57
  -1 -17  -6    2.19    0.79
   1  17  -6    4.45    0.81
   1  17  -6    4.65    1.01
  -1  17   6    3.76    0.82
  -1  17  -6    2.49    0.85
   1  17   6    3.10    0.80
   1 -17  -6    2.99    0.75
  -1  17  -6    2.80    0.42
   2  17  -6    0.38    0.63
  -2 -17  -6    0.10    0.72
  -2  17   6    0.44    0.62
  -2  17  -6    1.08    0.62
   2  17   6   -0.13    0.61
  -2 -17   6    1.52    0.55
   2 -17  -6    0.78    0.69
   3  17  -6   26.43    1.87
  -3 -17  -6   30.47    2.02
  -3 -17   6   26.51    1.36
   3  17   6   26.66    2.02
  -3  17  -6   27.54    2.12
   3 -17  -6   29.88    2.34
   4  17  -6    4.27    0.99
  -4 -17  -6    3.66    0.91
  -4  17   6    4.43    1.31
  -4  17  -6    3.48    1.18
   4  17   6    2.46    0.89
   4 -17  -6    3.60    1.21
  -5  17   6   21.73    2.23
   5  17  -6   20.43    1.93
  -5 -17  -6   18.64    1.62
   5  17   6   20.44    2.07
  -5  17  -6   21.46    2.16
  -6 -17  -6   -1.27    0.89
   6  17  -6   -0.41    0.81
  -6  17   6   -0.18    0.97
  -6  17  -6    0.43    0.85
   6  17   6   -0.94    0.77
   7  17  -6   -1.17    1.53
   7  17   6    1.87    1.12
   0  18   6    1.78    0.77
   0  18  -6    1.34    0.51
   0  18  -6    1.53    0.72
   0 -18  -6    0.07    0.68
   1  18  -6    1.75    0.65
   1  18  -6    1.19    0.74
  -1  18   6    0.51    0.77
  -1 -18  -6    0.36    0.73
  -1  18  -6   -0.25    0.67
   1 -18  -6    0.79    0.82
   1  18   6    0.77    0.67
   2  18  -6   36.80    2.07
  -2  18   6   39.89    1.88
  -2 -18  -6   39.67    2.35
   2  18   6   36.32    2.29
   2 -18  -6   40.27    2.69
  -2  18  -6   40.35    2.50
  -2 -18   6   38.46    1.98
   3  18  -6    6.31    1.16
  -3 -18  -6    8.44    1.32
   3  18   6    5.89    1.23
  -3  18  -6    6.90    1.38
   3 -18  -6    8.15    1.49
  -3 -18   6    6.35    0.93
  -4 -18  -6   23.90    1.84
  -4  18  -6   28.18    2.31
   4 -18  -6   27.09    2.43
   4  18   6   25.80    2.14
  -5  18   6    0.52    1.20
  -5 -18  -6    1.89    0.94
   5  18  -6    1.35    0.85
   5 -18  -6    3.41    1.38
   5  18   6    1.90    1.08
  -5  18  -6    1.80    1.15
  -6  18   6    0.09    2.76
   6  18  -6    2.42    1.17
   6  18   6    1.74    1.09
  -6  18  -6    2.13    1.46
   0  19   6    0.24    0.72
   0  19  -6   -0.99    0.58
   0  19  -6    0.00    0.76
   0 -19  -6    0.18    1.02
   1  19  -6    9.43    1.17
  -1  19   6   10.69    1.44
  -1 -19  -6   11.72    1.52
  -1  19  -6    8.85    1.45
   1 -19  -6   11.98    1.63
  -1 -19   6   10.80    1.26
   1  19   6   13.01    1.48
  -2 -19  -6    2.81    0.97
  -2  19   6    0.41    0.85
   2  19  -6    1.40    0.84
   2 -19  -6   -0.15    0.85
   2  19   6    1.87    0.79
  -2 -19   6    1.50    0.92
  -2  19  -6    3.13    1.14
   3  19  -6   29.09    2.03
  -3 -19  -6   27.95    2.08
   3 -19  -6   29.26    2.54
   3  19   6   28.10    2.22
  -3  19  -6   29.73    2.34
   4  19  -6    3.43    1.05
  -4 -19  -6    2.97    1.18
   4 -19  -6    4.10    1.49
  -4  19  -6    3.66    1.23
   4  19   6    4.94    1.19
  -5 -19  -6    6.61    1.44
   5  19  -6    5.35    1.28
  -5  19  -6    7.56    1.68
   5  19   6    7.25    1.58
   5 -19  -6    9.26    1.92
   0  20  -6    5.88    1.24
   0  20   6    4.25    1.11
   0 -20  -6    4.92    1.25
   1  20  -6    3.71    0.98
  -1  20   6    1.12    1.56
  -1 -20  -6    1.21    0.92
   1  20   6    1.97    0.96
  -1 -20   6    1.79    0.92
   1 -20  -6    3.83    1.23
   2  20  -6    3.27    0.95
  -2 -20   6    4.15    1.04
   2  20   6    2.98    1.02
   2 -20  -6    4.98    1.51
  -2  20  -6    3.54    1.13
   3  20  -6    5.51    1.13
  -3 -20  -6    3.99    1.04
  -3  20  -6    6.16    1.53
   3  20   6    5.72    1.31
   3 -20  -6    4.20    1.30
  -4 -20  -6   21.11    2.07
   4  20  -6   26.66    2.18
  -4  20  -6   26.62    2.47
   4 -20  -6   26.37    2.58
   4  20   6   27.02    2.40
   5  20  -6    0.21    1.08
   5  20   6   -0.96    1.15
   0  21   6    9.94    1.69
   0 -21  -6   12.98    1.81
   0  21  -6   14.07    1.91
   1  21  -6    1.46    1.16
  -1 -21  -6    3.32    1.25
  -1 -21   6    1.80    1.06
   1  21   6    3.51    1.13
   1 -21  -6    1.52    1.12
  -1  21  -6    3.73    1.20
   2  21  -6    2.01    1.07
  -2 -21  -6    3.13    1.04
   2 -21  -6    1.15    1.24
   2  21   6    5.19    1.34
  -2 -21   6    3.95    1.35
  -2  21  -6    3.53    1.27
  -3 -21  -6    6.03    1.45
   3  21  -6    8.18    1.63
  -3  21  -6    5.89    1.59
   3  21   6    5.93    1.41
   3 -21  -6    6.65    1.83
  -4 -21  -6    0.31    1.33
   4  21  -6    4.00    1.38
   4  21   6    5.40    1.35
   4 -21  -6    4.13    1.46
   0 -22   6    2.49    1.27
   0 -22  -6    2.66    1.18
  -1 -22  -6    9.98    1.80
   1  22   6    7.36    1.58
   1 -22  -6   10.49    1.90
  -1  22  -6    9.36    1.84
  -1 -22   6    6.31    1.46
  -2 -22  -6   -1.86    1.06
  -2  22  -6   -0.84    1.13
   2  22   6    0.72    1.22
   2 -22  -6    0.66    1.26
   0   0   7    0.19    0.12
   0   0   7    0.44    0.21
   0   0  -7    0.33    0.17
   0   0  -7    0.19    0.16
  -1   0   7  132.12    3.67
  -1   0  -7  140.08    3.83
   1   0  -7  128.09    3.88
   1   0   7  132.84    3.78
  -1   0  -7  129.99    3.80
  -1   0   7  134.74    3.95
   1   0  -7  139.38    3.70
   1   0   7  136.60    3.86
  -2   0  -7   16.77    0.93
   2   0  -7   16.51    0.81
   2   0  -7   17.74    0.80
  -2   0  -7   17.78    0.91
   2   0  -7   16.95    1.02
   2   0   7   18.45    0.95
   3   0  -7  275.82    6.99
   3   0   7  277.58    7.27
   3   0  -7  272.79    6.98
   3   0   7  255.91    7.23
  -3   0  -7  265.54    7.20
  -3   0  -7  274.13    7.30
   3   0  -7  265.04    7.47
   4   0  -7  144.79    4.06
   4   0  -7  145.22    4.05
   4   0   7  143.47    4.39
  -4   0  -7  146.08    4.43
   5   0   7    6.60    0.75
   5   0  -7    5.27    0.63
  -5   0   7    6.97    0.64
  -5   0  -7    5.57    0.72
   6   0   7   14.51    1.17
   6   0  -7   14.04    0.93
   6   0  -7   12.37    1.18
  -6   0   7   14.47    0.97
  -6   0  -7   16.85    1.27
  -7   0   7    0.67    0.40
  -7   0  -7    1.60    0.65
   7   0  -7    1.80    0.70
   7   0   7    0.11    0.48
   8   0  -7    2.24    0.89
  -8   0  -7    2.39    0.80
   8   0   7    0.80    0.61
  -8   0   7    1.38    0.57
   9   0   7   10.47    1.30
   9   0  -7   10.73    1.48
  -9   0  -7   10.43    1.37
  10   0  -7    3.31    1.13
  10   0   7    5.19    1.22
 -10   0  -7    1.34    1.12
   0   1  -7    9.78    0.68
   0   1   7   10.92    0.70
   0  -1   7   11.89    0.71
   0   1   7    9.84    0.61
   0   1  -7   10.68    0.66
   0  -1  -7    9.74    0.64
   0  -1   7   10.53    0.60
   0  -1  -7    9.94    0.63
   1  -1   7   46.62    1.64
  -1   1   7   42.45    1.53
  -1   1   7   46.19    1.72
   1   1  -7   46.53    1.47
  -1  -1  -7   42.00    1.61
   1  -1   7   40.60    1.54
   1   1   7   42.30    1.61
  -1  -1   7   41.85    1.65
   1  -1  -7   41.40    1.61
   1   1   7   38.81    1.50
   1  -1  -7   42.33    1.48
  -1  -1   7   44.35    1.42
  -1   1  -7   43.25    1.54
  -1   1  -7   42.54    1.52
  -2  -1  -7  165.16    4.78
   2   1  -7  170.95    4.99
  -2   1   7  174.36    4.97
   2  -1   7  174.51    4.76
   2   1  -7  170.95    4.50
   2   1  -7  175.31    4.56
   2  -1   7  167.34    4.79
  -2  -1  -7  174.70    4.83
   2  -1  -7  171.70    4.70
   2  -1  -7  170.90    4.66
   2   1   7  176.61    4.89
  -2   1  -7  172.46    4.73
  -2   1  -7  176.34    4.84
   2   1   7  166.84    4.79
  -3  -1  -7  249.06    6.62
   3  -1   7  241.46    6.52
   3  -1   7  234.70    6.62
  -3  -1  -7  233.15    6.56
   3   1  -7  247.02    6.20
   3   1  -7  238.38    6.16
   3  -1  -7  236.44    6.26
  -3   1  -7  232.78    6.40
   3   1   7  245.56    6.56
   3   1   7  224.97    6.44
  -3   1  -7  239.16    6.52
   3  -1  -7  242.33    6.30
   4  -1   7  153.31    4.50
  -4   1   7  149.44    4.38
  -4  -1  -7  156.80    4.59
   4   1  -7  144.29    4.07
   4  -1  -7  142.40    4.09
   4   1   7  147.46    4.43
  -4   1  -7  145.62    4.42
  -4   1  -7  134.78    4.19
   5   1  -7   25.65    1.12
   5   1  -7   27.21    1.15
  -5   1   7   26.40    1.32
  -5  -1  -7   27.82    1.49
   5  -1   7   26.97    1.45
  -5   1  -7   26.46    1.48
   5  -1  -7   25.85    1.24
   5   1   7   25.42    1.48
  -6   1   7    1.58    0.46
   6  -1   7    1.38    0.47
  -6  -1  -7    2.45    0.61
   6   1  -7    1.98    0.68
   6   1  -7    2.23    0.58
   6   1   7    1.67    0.59
   6  -1  -7    2.83    0.65
  -6   1  -7    1.63    0.50
   7   1  -7    9.30    1.18
   7   1  -7    8.11    0.79
   7  -1   7    8.33    0.98
  -7  -1  -7    9.50    1.02
  -7   1   7    8.30    0.98
   7   1   7   10.16    1.15
   7  -1  -7    8.92    1.18
  -7   1  -7   10.41    1.17
   8   1  -7   29.48    2.13
  -8   1   7   30.02    1.70
  -8  -1  -7   30.08    1.97
   8  -1   7   30.53    1.91
   8   1   7   28.31    1.96
   8  -1  -7   32.65    2.11
  -8   1  -7   29.22    1.94
  -9  -1  -7    0.61    0.73
  -9   1   7    0.91    0.77
   9   1  -7    1.41    0.80
   9  -1   7    1.46    0.77
   9   1  -7    0.52    0.58
   9   1   7    3.50    1.22
   9  -1  -7    0.72    0.75
  -9   1  -7    0.90    0.73
  10   1  -7    9.20    1.79
 -10  -1  -7   13.30    1.70
  10  -1  -7    9.39    1.81
 -10   1  -7    9.79    1.77
  10   1   7    9.32    1.57
   0  -2  -7   62.36    2.15
   0  -2  -7   68.59    2.18
   0   2   7   61.81    2.10
   0  -2   7   65.85    2.03
   0   2   7   66.90    2.25
   0   2  -7   64.90    2.14
   0  -2   7   68.56    2.18
   1  -2   7   34.96    1.37
   1  -2   7   39.64    1.45
  -1  -2  -7   34.53    1.44
  -1   2   7   36.22    1.39
   1   2  -7   39.05    1.26
  -1   2   7   37.41    1.54
   1   2  -7   34.30    1.48
  -1  -2   7   39.65    1.28
  -1  -2   7   37.35    1.52
   1  -2  -7   35.67    1.47
   1   2   7   36.95    1.44
  -1   2  -7   37.27    1.38
   1  -2  -7   36.36    1.41
   1   2   7   38.54    1.53
  -1   2  -7   37.74    1.42
  -2   2   7    1.54    0.40
  -2  -2  -7    1.31    0.34
   2  -2   7    1.55    0.30
   2  -2   7    1.09    0.29
  -2  -2  -7    1.93    0.37
   2   2  -7    1.63    0.23
   2   2  -7    2.10    0.42
   2  -2  -7    1.78    0.33
   2  -2  -7    1.79    0.35
  -2   2  -7    1.74    0.36
   2   2   7    1.62    0.36
   2   2   7    1.49    0.33
  -2  -2   7    1.82    0.23
  -2   2  -7    2.02    0.33
  -3  -2  -7   75.82    2.60
   3   2  -7   76.04    2.14
   3  -2   7   80.31    2.51
  -3  -2  -7   71.09    2.58
   3   2  -7   76.43    2.15
   3   2   7   72.80    2.57
   3  -2  -7   70.69    2.59
  -3   2  -7   75.04    2.37
   3   2   7   66.62    2.42
   3  -2  -7   70.55    2.36
  -3   2  -7   74.71    2.56
   3  -2  -7   75.21    2.42
  -4  -2  -7   66.76    2.45
   4  -2   7   64.21    2.33
   4   2  -7   65.82    1.93
  -4   2   7   68.13    2.41
   4   2  -7   65.37    1.95
   4   2   7   68.41    2.53
   4  -2  -7   62.79    2.23
  -4   2  -7   58.20    2.17
  -4   2  -7   64.25    2.44
  -5  -2  -7   30.99    1.60
  -5   2   7   30.86    1.54
   5   2  -7   31.01    1.18
   5   2  -7   31.86    1.16
   5  -2   7   33.27    1.57
  -5   2  -7   31.33    1.68
   5   2   7   32.27    1.73
  -6   2   7    3.92    0.71
   6  -2   7    3.21    0.63
   6   2  -7    3.48    0.91
   6   2  -7    3.65    0.47
   6   2  -7    3.16    0.47
   6   2   7    3.55    0.77
  -6   2  -7    3.34    0.83
   7  -2   7   13.14    1.20
   7   2  -7   12.03    0.79
   7   2  -7   11.08    0.80
   7   2  -7   13.92    1.38
  -7   2   7   11.01    1.09
  -7  -2  -7   10.89    1.10
   7   2   7   12.68    1.29
  -7   2  -7   13.08    1.32
   7  -2  -7   12.74    1.30
  -8  -2  -7    2.25    0.61
   8   2  -7    2.60    0.79
   8   2  -7    1.46    0.50
  -8   2   7    1.38    0.63
   8  -2   7    0.78    0.59
  -8   2  -7    2.49    0.91
   8  -2  -7    2.95    0.86
   8   2   7    1.61    0.71
   9   2  -7    7.77    1.36
  -9   2   7    6.49    1.28
  -9  -2  -7    6.01    1.30
   9  -2   7    6.73    1.19
   9   2   7    5.73    1.21
  -9   2  -7    8.82    1.45
   9  -2  -7    7.56    2.13
  10   2  -7   -0.05    0.97
 -10  -2  -7    1.78    0.95
  10  -2   7    2.55    1.01
  10  -2  -7    1.92    0.98
 -10   2  -7    4.97    1.35
  10   2   7    1.82    1.00
   0   3   7   62.77    2.17
   0  -3   7   64.28    2.09
   0  -3  -7   62.72    2.11
   0  -3  -7   55.83    2.06
   0   3  -7   63.47    1.98
   0   3  -7   62.98    2.07
   0  -3   7   61.97    1.95
   1  -3   7   79.78    2.45
  -1  -3  -7   73.54    2.54
  -1   3   7   79.86    2.61
   1  -3   7   77.08    2.45
   1   3  -7   79.36    2.60
   1   3  -7   79.21    2.23
  -1  -3  -7   77.03    2.53
  -1  -3   7   79.28    2.26
   1   3   7   78.44    2.53
   1  -3  -7   79.86    2.60
  -1   3  -7   78.66    2.40
   1  -3  -7   76.59    2.51
  -1   3  -7   81.98    2.49
   1  -3  -7   77.31    2.54
  -2   3   7   19.97    1.10
  -2  -3  -7   18.39    1.02
   2   3  -7   18.96    0.69
   2  -3   7   18.97    1.01
   2   3  -7   18.27    1.09
  -2   3  -7   18.82    0.86
   2   3   7   18.30    0.99
   2   3   7   19.94    1.09
   2  -3  -7   19.43    1.03
  -2   3  -7   18.01    0.99
  -2  -3   7   18.82    0.71
   2  -3  -7   18.33    0.98
   3   3  -7  116.18    2.99
   3  -3   7  116.29    3.41
  -3  -3  -7  117.91    3.62
   3   3  -7  114.93    3.00
  -3   3  -7  113.06    3.54
  -3   3  -7  108.73    3.21
   3  -3  -7  114.14    3.44
   3   3   7  109.45    3.43
   3  -3  -7  106.56    3.37
   3  -3  -7  110.39    3.54
   3   3   7  110.54    3.57
  -4  -3  -7   24.89    1.29
   4   3  -7   22.00    0.76
  -4   3   7   23.09    1.26
   4  -3   7   23.71    1.16
   4   3  -7   21.72    0.75
   4  -3  -7   21.08    1.14
   4   3   7   22.43    1.34
  -4   3  -7   22.57    1.32
   5   3  -7   55.70    1.65
   5  -3   7   55.11    2.19
  -5   3   7   58.34    2.34
   5   3  -7   57.43    1.67
  -5  -3  -7   62.91    2.40
   5   3  -7   57.90    2.53
  -5   3  -7   49.52    2.02
   5   3   7   60.08    2.52
  -5   3  -7   59.18    2.97
   6   3  -7   13.02    0.66
   6   3  -7   12.95    1.29
   6   3  -7   12.60    0.63
  -6  -3  -7   11.99    1.12
   6  -3   7   12.56    0.99
  -6   3   7   12.78    1.13
  -6   3  -7   11.27    1.11
   6   3   7   12.74    1.17
   7   3  -7    5.77    0.53
   7   3  -7    5.69    0.53
   7  -3   7    5.24    0.86
  -7   3   7    7.38    1.57
   7   3  -7    5.74    1.06
  -7  -3  -7    5.01    0.88
   7  -3  -7    5.66    0.94
   7   3   7    5.98    0.98
  -7   3  -7    5.13    0.98
   8  -3   7    8.97    1.10
  -8   3   7    9.55    1.22
   8   3  -7    7.02    1.23
  -8  -3  -7   11.94    1.29
  -8   3  -7    8.93    1.22
   8  -3  -7   11.72    1.25
   8   3   7    7.87    1.19
  -9  -3  -7    0.63    0.76
   9   3  -7    0.86    0.85
  -9   3   7    0.02    0.82
   9  -3   7    0.85    0.75
   9  -3  -7    2.16    0.82
   9   3   7    4.90    1.47
  -9   3  -7    0.58    0.76
 -10   3   7    4.01    1.36
  10   3  -7    3.70    1.16
 -10  -3  -7    3.42    1.08
  10  -3   7    4.10    1.44
  10  -3  -7    3.74    1.12
 -10   3  -7    2.72    1.04
  10   3   7    3.90    1.15
   0   4  -7   75.77    2.45
   0  -4   7   76.99    2.36
   0  -4  -7   77.74    2.55
   0   4  -7   78.02    2.35
   0   4   7   79.50    2.61
   0  -4   7   80.04    2.48
   1  -4   7  123.82    3.64
   1   4  -7  124.96    3.36
  -1   4   7  126.91    3.79
  -1  -4  -7  128.36    3.76
   1  -4   7  125.25    3.53
   1   4  -7  123.39    3.76
   1   4   7  112.27    3.58
   1  -4  -7  118.00    3.54
   1  -4  -7  120.77    3.62
  -1   4  -7  120.24    3.34
   1  -4  -7  116.43    3.55
  -1   4  -7  121.12    3.48
   1   4   7  115.37    3.52
  -1  -4   7  120.56    3.21
   2  -4   7   94.64    3.08
   2  -4   7   98.64    2.85
   2   4  -7   99.75    2.55
   2   4  -7   90.95    3.17
  -2   4   7  100.77    3.20
  -2  -4  -7   93.40    3.11
  -2  -4  -7  101.66    3.13
  -2   4  -7   96.17    2.75
  -2  -4   7   95.51    2.51
   2  -4  -7   94.11    3.02
   2  -4  -7   92.12    3.28
   2  -4  -7   95.39    3.06
   2   4   7   91.76    2.99
   2   4   7   99.11    3.16
  -2   4  -7   96.62    3.05
  -3  -4  -7   13.58    0.89
  -3   4   7   11.48    0.86
   3  -4   7   12.83    0.73
  -3   4  -7   11.40    0.67
   3  -4  -7   10.99    0.83
   3   4   7    9.55    0.74
   3  -4  -7   11.81    0.86
  -3   4  -7   11.95    0.87
   3   4   7   11.60    0.90
   4  -4   7   39.66    1.55
  -4  -4  -7   40.79    1.77
  -4   4   7   37.55    1.77
  -4   4  -7   37.33    1.79
   4   4   7   38.23    1.86
  -4   4  -7   35.65    1.43
  -5  -4  -7   22.55    1.34
   5  -4   7   22.09    1.20
  -5   4   7   19.02    1.29
   5   4  -7   19.49    1.43
  -5   4  -7   20.85    1.39
  -5   4  -7   17.00    1.00
   5   4   7   19.89    1.40
   6  -4   7   68.51    2.61
  -6  -4  -7   73.04    2.81
   6   4  -7   68.59    3.09
  -6   4   7   68.44    2.83
  -6   4  -7   66.05    2.91
   6   4   7   69.70    3.02
   7   4  -7   12.34    1.36
   7  -4   7   12.96    1.08
  -7  -4  -7   11.82    1.16
  -7   4   7   13.08    1.27
   7  -4  -7   11.26    1.14
  -7   4  -7   12.19    1.29
   7   4   7   12.55    1.28
   8  -4   7    5.39    1.03
   8   4  -7    3.79    1.49
  -8  -4  -7    5.26    1.01
  -8   4   7    4.60    0.96
  -8   4  -7    4.50    1.01
   8  -4  -7    4.57    0.91
   8   4   7    5.13    1.10
   9  -4   7    6.57    1.18
   9   4  -7    8.68    1.56
  -9   4   7    7.90    1.46
  -9  -4  -7   10.04    1.33
  -9   4  -7   10.28    1.57
   9  -4  -7   10.59    1.42
   9   4   7    9.05    1.41
 -10  -4  -7    0.44    1.28
  10  -4   7    0.83    0.91
  10   4  -7    3.27    1.17
 -10   4   7    0.85    1.38
  10  -4  -7    2.57    1.06
  10   4   7    1.04    1.01
 -10   4  -7    0.63    1.01
   0   5  -7   21.68    0.94
   0   5   7   19.43    1.04
   0  -5  -7   20.21    1.07
   0  -5   7   19.33    0.90
   0   5   7   20.77    1.09
   0  -5  -7   18.38    1.02
   0   5  -7   19.21    0.96
   1  -5   7  161.04    4.79
  -1   5   7  166.65    4.71
   1  -5   7  169.71    4.42
  -1  -5  -7  161.26    4.67
   1   5  -7  154.94    4.64
   1   5  -7  161.00    4.24
  -1  -5  -7  154.47    4.64
   1  -5  -7  153.40    4.81
   1  -5  -7  149.91    4.62
  -1  -5   7  162.78    4.21
  -1   5  -7  168.19    4.54
  -1   5  -7  161.93    4.33
   1   5   7  165.09    4.70
   1   5   7  154.35    4.57
   2  -5   7   55.25    2.12
   2   5  -7   59.91    1.62
  -2  -5  -7   59.18    2.17
   2  -5   7   57.26    1.86
  -2   5   7   60.83    2.22
  -2   5  -7   57.47    1.80
   2  -5  -7   59.89    2.20
   2   5   7   55.87    2.21
  -2  -5   7   56.56    1.59
  -2   5  -7   59.59    2.17
   2  -5  -7   55.99    2.08
   2   5   7   57.19    2.10
   2  -5  -7   58.84    2.17
  -3  -5  -7    2.81    0.45
   3  -5   7    3.23    0.37
  -3   5   7    3.04    0.56
   3   5   7    2.83    0.50
  -3   5  -7    2.44    0.31
  -3   5  -7    2.84    0.47
   3  -5  -7    2.27    0.42
  -4  -5  -7    0.39    0.29
  -4   5   7    0.94    0.41
   4  -5   7    0.37    0.22
   4   5  -7    1.40    0.40
  -4   5  -7    1.17    0.31
  -4   5  -7    0.59    0.37
   4   5   7    0.71    0.39
  -5  -5  -7   82.74    2.99
   5   5  -7   80.32    3.27
   5  -5   7   82.68    2.72
  -5   5   7   83.20    3.16
  -5   5  -7   82.72    3.23
   5   5   7   83.99    3.32
  -6   5   7   13.08    1.18
  -6  -5  -7   10.62    1.05
   6  -5   7   12.55    0.97
   6   5  -7   15.11    1.40
   6   5   7   16.72    1.43
  -6   5  -7   16.76    1.40
   7   5  -7   20.04    1.69
   7  -5   7   17.68    1.24
  -7   5   7   19.14    1.51
  -7  -5  -7   18.31    1.34
   7  -5  -7   19.33    1.39
   7   5   7   20.31    1.61
  -7   5  -7   16.83    1.49
   8   5  -7    7.03    1.48
  -8   5   7    6.08    1.17
   8  -5   7    5.63    0.97
  -8  -5  -7    7.92    1.01
   8   5   7    6.04    1.19
   8  -5  -7    7.13    1.03
  -8   5  -7    5.57    1.22
  -9  -5  -7    1.82    0.84
   9   5  -7    0.87    0.87
  -9   5   7    0.50    0.92
   9  -5   7    1.61    0.84
  -9   5  -7    2.47    0.89
   9  -5  -7    1.74    0.81
   9   5   7    1.36    1.00
 -10   5   7    2.32    1.37
 -10  -5  -7    4.66    1.54
  10   5  -7    2.81    1.45
  10  -5  -7    5.93    1.15
 -10   5  -7    1.41    1.11
  10   5   7    1.95    0.99
   0  -6  -7   68.12    2.40
   0   6  -7   71.62    2.25
   0  -6   7   71.26    2.24
   0  -6  -7   66.62    2.50
   0   6  -7   69.62    2.29
   0  -6  -7   70.65    2.49
   0   6   7   70.76    2.49
  -1  -6  -7  181.75    5.44
  -1  -6  -7  193.41    5.49
  -1   6   7  201.38    5.51
   1   6  -7  199.63    5.04
   1   6  -7  189.30    5.74
   1  -6   7  188.95    5.33
  -1   6  -7  186.42    5.36
   1  -6  -7  198.14    5.64
   1  -6  -7  199.77    5.59
  -1  -6   7  195.58    5.07
  -1   6  -7  194.82    5.16
   1   6   7  194.18    5.49
   1  -6  -7  190.65    5.40
   1   6   7  193.32    5.56
  -2  -6  -7  147.45    4.44
   2   6  -7  148.04    3.78
   2  -6   7  146.32    3.98
  -2   6   7  153.01    4.49
   2   6   7  137.21    4.14
  -2   6  -7  138.82    3.69
  -2  -6   7  139.24    3.52
   2  -6  -7  133.78    4.22
  -2   6  -7  141.22    4.21
   2   6   7  138.82    4.31
   2  -6  -7  135.24    4.08
  -3   6   7    8.19    0.83
  -3  -6  -7    8.80    0.75
   3  -6   7    8.65    0.54
  -3   6   7    7.91    0.75
  -3   6  -7    8.60    0.81
   3   6   7    9.73    0.86
   3  -6  -7    7.19    0.68
  -3   6  -7    8.32    0.50
  -4   6   7    6.56    0.87
   4  -6   7    6.57    0.53
  -4  -6  -7    7.41    0.74
   4   6  -7    6.38    0.82
  -4   6  -7    6.95    0.51
   4   6   7    7.70    0.87
  -4   6  -7    8.25    0.86
   5   6  -7   20.52    1.51
  -5   6   7   21.26    1.55
  -5  -6  -7   20.50    1.29
   5  -6   7   19.13    1.00
  -5   6  -7   19.59    1.46
   5   6   7   19.27    1.45
   6  -6   7  102.44    3.26
  -6   6   7  102.47    3.87
  -6  -6  -7   99.42    3.58
   6   6  -7  102.98    4.09
  -6   6  -7   97.28    3.83
   6   6   7   95.17    3.86
   7   6  -7    8.98    1.24
   7  -6   7    8.11    0.83
  -7  -6  -7    7.31    0.97
  -7   6   7    8.76    1.10
  -7   6  -7    7.44    1.20
   7  -6  -7    6.97    0.90
   7   6   7    8.80    1.24
   8  -6   7    4.69    0.88
  -8   6   7    4.02    0.94
  -8  -6  -7    5.28    1.02
   8   6  -7    6.52    1.24
  -8   6  -7    3.89    1.34
   8  -6  -7    4.05    0.93
   8   6   7    4.89    1.05
  -9  -6  -7    2.04    0.85
   9  -6   7    4.96    1.08
  -9   6   7    4.90    1.39
   9   6  -7    3.66    1.17
   9  -6  -7    6.79    1.35
   9   6   7    1.89    1.00
  -9   6  -7    3.96    1.27
 -10  -6  -7    3.49    1.34
  10   6  -7    4.37    1.44
 -10   6   7    2.97    1.29
 -10   6  -7    2.37    1.16
  10   6   7    2.66    1.24
  10  -6  -7    1.97    1.10
   0  -7   7    4.04    0.44
   0   7   7    4.42    0.56
   0  -7  -7    4.29    0.51
   0  -7  -7    5.47    0.60
   0   7  -7    3.95    0.45
   0   7  -7    3.61    0.43
  -1   7   7   53.17    2.04
  -1  -7  -7   52.21    2.06
   1   7  -7   48.88    1.93
   1  -7   7   49.94    1.90
  -1   7  -7   56.02    2.02
   1  -7  -7   50.20    1.96
   1   7   7   51.61    2.10
  -1   7  -7   53.24    1.74
   1  -7  -7   51.78    2.11
  -1  -7   7   51.91    1.70
   2   7  -7   28.48    0.98
  -2   7   7   30.63    1.47
  -2  -7  -7   29.46    1.45
  -2  -7   7   26.63    0.89
   2  -7  -7   26.88    1.27
   2  -7  -7   25.45    1.40
  -2   7  -7   26.66    1.38
  -2   7  -7   25.02    0.93
   2   7   7   26.66    1.45
  -3   7   7   33.90    1.79
   3  -7   7   33.86    1.15
   3   7  -7   33.38    1.68
  -3   7   7   34.37    1.61
  -3  -7  -7   34.90    1.63
  -3   7  -7   33.40    1.08
  -3   7  -7   35.72    1.74
   3  -7  -7   33.30    1.50
   3   7   7   34.31    1.77
   4   7  -7   15.27    1.31
  -4   7   7   14.20    1.18
   4  -7   7   15.63    0.72
  -4  -7  -7   15.58    1.08
  -4   7  -7   13.21    0.61
   4   7   7   14.56    1.18
  -4   7  -7   15.29    1.15
  -5   7   7   43.88    2.26
  -5  -7  -7   50.79    2.15
   5   7  -7   44.89    2.37
   5   7   7   45.31    2.34
  -5   7  -7   46.00    2.34
   6   7  -7    8.77    1.18
  -6   7   7   10.25    1.18
  -6  -7  -7    8.57    0.93
   6  -7   7    9.47    0.74
   6   7   7    8.02    1.14
  -6   7  -7    6.96    1.09
   7  -7   7    3.81    0.69
  -7   7   7    3.41    0.85
  -7  -7  -7    5.15    0.97
   7   7  -7    3.07    0.97
  -7   7  -7    1.97    0.81
   7  -7  -7    4.15    0.83
   7   7   7    3.81    1.04
   8   7  -7   10.30    1.56
  -8   7   7   13.55    1.57
  -8  -7  -7   15.06    1.32
   8  -7   7   12.32    1.11
   8  -7  -7   13.23    1.31
  -8   7  -7   12.90    1.65
   8   7   7   13.78    1.62
  -9   7   7    2.27    1.07
   9   7  -7    0.85    1.03
  -9  -7  -7    3.82    1.01
  -9   7  -7    1.51    0.98
   9  -7  -7    2.17    0.87
   9   7   7    3.73    1.19
   0   8  -7   18.54    0.98
   0  -8   7   18.17    0.95
   0   8   7   19.19    1.13
   0   8  -7   20.54    1.03
   0  -8  -7   17.24    1.05
   0  -8  -7   19.56    1.19
  -1  -8  -7   21.28    1.25
   1   8  -7   18.35    1.07
   1   8  -7   22.21    0.99
  -1   8   7   23.81    1.24
   1  -8  -7   26.05    1.41
   1  -8  -7   22.40    1.19
   1   8   7   24.32    1.35
  -1  -8   7   26.12    1.04
  -1   8  -7   22.92    1.24
  -1   8  -7   23.96    1.00
  -2   8   7   32.02    1.53
   2   8  -7   30.76    1.50
  -2  -8  -7   29.29    1.51
   2   8  -7   30.58    1.07
   2   8   7   30.11    1.58
  -2   8  -7   26.38    1.45
  -2  -8   7   28.24    0.97
  -2   8  -7   26.57    0.93
   2  -8  -7   27.85    1.33
   2  -8  -7   26.87    1.50
   3   8  -7   21.08    1.36
  -3   8   7   20.03    1.39
  -3  -8  -7   21.24    1.28
  -3   8   7   22.29    1.27
   3  -8  -7   20.56    1.15
  -3   8  -7   20.19    0.60
  -3   8  -7   20.51    1.34
   3   8   7   20.28    1.37
  -4   8   7    1.21    0.50
  -4  -8  -7    1.54    0.51
   4   8  -7    0.65    0.53
   4   8   7    1.82    0.59
  -4   8  -7    1.78    0.51
  -5  -8  -7   15.31    1.11
   5  -8   7   15.80    0.69
  -5   8   7   15.21    1.36
   5   8  -7   16.43    1.44
   5   8   7   16.33    1.39
  -5   8  -7   15.05    1.37
   6   8  -7   10.52    1.29
  -6  -8  -7   10.27    1.16
  -6   8   7    9.06    1.22
   6  -8   7    9.57    0.66
  -6   8  -7   10.11    1.25
   6   8   7   11.15    1.29
   7   8  -7   10.54    1.33
   7  -8   7    8.85    0.79
  -7  -8  -7   10.60    1.09
  -7   8   7   10.82    1.32
   7   8   7    9.11    1.31
  -7   8  -7    9.86    1.36
   7  -8  -7    9.52    1.03
  -8  -8  -7    2.85    0.76
   8  -8   7    2.83    0.69
  -8   8   7    3.42    0.96
   8   8  -7    3.57    1.03
   8  -8  -7    3.73    0.88
  -8   8  -7    6.67    1.29
   8   8   7    2.42    0.92
  -9  -8  -7    2.63    0.94
  -9   8   7    3.79    1.14
   9   8  -7    2.72    1.17
   9  -8  -7    1.21    0.85
   9   8   7    1.27    0.95
  -9   8  -7    1.62    0.92
   0   9  -7   51.59    1.92
   0  -9  -7   55.61    2.28
   0   9  -7   54.38    1.87
   0  -9   7   52.85    1.95
   0   9   7   56.74    2.22
   0   9  -7   55.47    2.04
  -1   9   7   15.66    1.03
   1   9  -7   13.60    0.80
   1   9  -7   13.78    0.90
  -1  -9  -7   14.93    1.05
  -1  -9   7   13.79    0.76
  -1   9  -7   16.31    1.02
   1   9   7   13.87    1.04
   1  -9  -7   13.88    0.94
  -1   9  -7   14.18    0.74
   1  -9  -7   14.44    1.08
  -2  -9  -7    6.15    0.71
   2   9  -7    6.49    0.48
   2   9  -7    6.19    0.71
  -2   9   7    6.36    0.69
   2   9   7    6.51    0.74
  -2  -9   7    7.19    0.46
   2  -9  -7    5.73    0.63
  -2   9  -7    6.53    0.34
   2  -9  -7    5.59    0.72
  -2   9  -7    5.04    0.72
  -2   9  -7    6.63    0.41
  -3   9   7   55.94    2.64
  -3   9   7   52.99    2.15
   3   9  -7   51.34    2.33
  -3  -9  -7   51.11    2.18
   3  -9  -7   45.71    1.84
   3   9   7   42.21    3.10
  -4  -9  -7   45.84    2.07
   4   9  -7   45.93    2.27
  -4   9   7   41.81    2.29
   4   9   7   40.31    2.16
  -4   9  -7   40.37    2.11
   5   9  -7   12.25    1.24
  -5  -9  -7   12.23    1.05
  -5   9   7   10.22    1.21
   5   9   7    8.61    1.04
  -5   9  -7    8.84    1.07
  -6  -9  -7    5.01    1.00
   6   9  -7    5.11    1.03
  -6   9   7    7.04    1.17
  -6   9  -7    5.08    1.05
   6   9   7    4.66    1.00
  -7   9   7   15.04    1.58
   7   9  -7   11.80    1.58
  -7  -9  -7   15.64    1.30
   7  -9  -7   13.59    1.19
   7   9   7   14.42    1.81
  -7   9  -7   13.60    1.89
  -8  -9  -7    7.93    1.20
   8   9  -7    7.47    1.53
  -8   9   7   10.66    1.72
  -8   9  -7    8.70    1.46
   8   9   7    7.11    1.40
   8  -9  -7    7.96    1.19
   9   9  -7    4.95    1.49
  -9  -9  -7    6.08    1.14
  -9   9   7    5.82    1.58
   9   9   7    2.79    1.24
   9  -9  -7    2.78    0.93
  -9   9  -7    2.65    1.33
   0 -10   7   27.63    1.35
   0  10  -7   32.90    1.35
   0  10  -7   33.76    1.51
   0 -10  -7   29.80    1.65
   0  10  -7   30.85    1.35
   0  10   7   32.36    1.62
  -1 -10  -7   24.50    1.45
   1  10  -7   23.65    1.25
  -1  10   7   23.13    1.32
   1  10  -7   24.11    1.15
   1 -10  -7   24.97    1.49
  -1  10  -7   22.67    1.33
  -1 -10   7   24.78    1.13
  -1  10  -7   22.52    1.00
  -1  10  -7   24.33    0.97
   1  10   7   25.72    1.43
   2  10  -7   24.34    1.10
  -2  10   7   21.51    1.27
   2  10  -7   23.01    1.34
  -2 -10  -7   23.98    1.42
   2 -10  -7   19.64    1.14
   2  10   7   20.93    1.37
   2 -10  -7   20.96    1.61
  -2  10  -7   22.16    1.39
  -2 -10   7   20.88    0.89
  -3  10   7  119.22    4.38
  -3 -10  -7  117.31    3.97
   3  10  -7  116.95    4.07
  -3  10   7  119.69    3.84
   3 -10  -7  106.23    3.46
  -3  10  -7  107.43    3.89
   3  10   7  110.32    3.98
   4  10  -7   40.54    2.18
  -4  10   7   38.10    2.23
  -4 -10  -7   38.42    1.90
   4  10   7   37.09    2.13
  -4  10  -7   40.44    2.19
   4 -10  -7   36.23    2.47
  -5 -10  -7    4.79    0.78
   5  10  -7    4.49    0.94
  -5  10   7    3.60    0.92
  -5  10  -7    4.21    0.89
   5  10   7    3.97    0.87
   6  10  -7    5.49    1.11
  -6 -10  -7    7.25    0.94
  -6  10   7    5.93    1.13
   6  10   7    6.21    1.11
  -6  10  -7    5.79    1.14
   7  10  -7   20.50    1.95
  -7 -10  -7   17.68    1.36
  -7  10   7   21.11    1.94
   7 -10  -7   19.22    1.34
   7  10   7   18.65    1.88
  -7  10  -7   17.29    1.79
  -8 -10  -7   -0.82    0.66
  -8  10   7    2.34    1.09
   8  10  -7    1.05    0.90
   8 -10  -7    0.37    0.70
   8  10   7   -0.07    0.82
  -8  10  -7    0.28    0.92
   9  10  -7    0.10    1.27
  -9  10   7    5.20    1.56
   9  10   7    4.52    1.23
  -9  10  -7    2.76    1.16
   0 -11  -7   32.56    1.79
   0  11   7   34.41    1.71
   0  11  -7   33.52    1.60
   0  11  -7   29.55    1.35
   1  11  -7   25.99    1.35
  -1  11   7   24.81    1.43
   1  11  -7   27.22    1.31
  -1 -11  -7   27.16    1.59
  -1  11  -7   25.93    1.03
  -1  11  -7   24.88    1.46
  -1 -11   7   23.86    1.18
   1  11   7   29.96    1.61
  -1  11  -7   25.39    1.06
   1 -11  -7   26.08    1.61
   2  11  -7   29.57    1.62
  -2  11   7   33.29    1.62
   2  11  -7   32.21    1.33
  -2 -11  -7   32.56    1.76
   2 -11  -7   32.69    1.87
  -2 -11   7   29.52    1.18
   2  11   7   32.34    2.12
   2 -11  -7   27.72    1.66
  -2  11  -7   33.23    2.69
  -3 -11  -7   73.53    2.90
   3  11  -7   69.23    2.93
  -3  11   7   79.63    2.79
   3 -11  -7   69.04    2.58
  -3  11  -7   78.50    3.15
   3  11   7   76.92    3.17
  -4  11   7  133.39    4.88
   4  11  -7  123.46    4.54
  -4 -11  -7  129.04    4.32
   4 -11  -7  117.64    4.36
   4  11   7  130.28    4.67
  -4  11  -7  127.56    4.61
  -5  11   7   21.96    1.79
  -5 -11  -7   21.22    2.15
   5  11  -7   20.91    1.71
   5  11   7   17.27    1.57
  -5  11  -7   21.33    1.68
   6  11  -7    0.48    0.73
  -6 -11  -7   -0.30    0.50
  -6  11   7    0.70    0.76
   6  11   7    0.10    0.54
  -6  11  -7   -0.28    0.66
  -7 -11  -7    4.83    0.92
  -7  11   7    5.85    1.33
   7  11  -7    5.10    1.28
  -7  11  -7    2.96    1.00
   7  11   7    4.00    1.03
   7 -11  -7    6.25    0.97
  -8 -11  -7   21.20    1.65
   8  11  -7   21.90    2.22
  -8  11   7   20.48    2.15
   8  11   7   18.70    2.05
   8 -11  -7   20.69    1.66
  -8  11  -7   20.62    2.07
   9  11  -7   -0.69    0.88
  -9  11   7    0.31    1.34
   9  11   7    0.21    1.03
  -9  11  -7    1.05    1.74
   0  12  -7    2.90    0.58
   0  12  -7    4.11    0.69
   0 -12  -7    4.46    0.81
   0  12  -7    3.61    0.55
   0  12   7    3.56    0.69
  -1  12   7   20.68    1.33
  -1 -12  -7   20.46    1.64
   1  12  -7   20.34    1.20
   1  12  -7   20.47    1.19
  -1  12  -7   21.33    1.39
  -1  12  -7   18.98    0.91
  -1 -12   7   21.10    1.12
   1 -12  -7   21.53    1.50
  -1  12  -7   18.16    0.87
   1  12   7   21.91    1.44
   2  12  -7   11.04    0.78
  -2  12   7   11.03    0.98
   2  12  -7   10.71    0.98
  -2 -12  -7   10.51    1.28
   2  12   7    9.59    1.02
   2 -12  -7   11.10    1.18
  -2 -12   7   10.28    0.69
  -2  12  -7   11.07    1.03
  -3  12   7   46.93    2.04
   3  12  -7   52.35    2.37
  -3 -12  -7   45.43    2.75
  -3  12   7   47.04    2.56
   3  12   7   50.29    2.46
   3 -12  -7   39.55    1.91
  -3 -12   7   45.33    1.29
  -3 -12   7   42.85    1.40
  -3  12  -7   46.75    2.36
   4  12  -7   24.99    1.76
  -4 -12  -7   25.98    1.80
  -4  12   7   24.54    1.90
   4 -12  -7   23.06    1.40
   4  12   7   25.00    1.80
  -4  12  -7   22.01    1.73
   5  12  -7   13.26    1.44
  -5  12   7   12.32    1.46
  -5 -12  -7   12.90    1.17
   5  12   7   11.12    1.31
  -5  12  -7   10.77    1.39
  -6  12   7    9.27    1.49
  -6 -12  -7    9.13    1.13
   6  12  -7    8.15    1.53
   6  12   7   12.51    1.58
  -6  12  -7    8.46    1.29
  -7 -12  -7    2.88    0.85
   7  12  -7    3.25    1.12
  -7  12   7    2.61    1.17
   7 -12  -7    4.35    0.89
  -7  12  -7    1.29    0.96
   7  12   7    2.16    0.99
   8  12  -7    1.09    0.98
  -8  12   7    0.27    1.02
  -8 -12  -7    1.92    0.96
   8  12   7    2.25    1.07
  -8  12  -7    2.71    1.19
   0  13  -7   10.57    0.99
   0  13  -7    9.06    0.85
   0  13  -7    9.40    0.79
   0 -13  -7   10.52    1.12
   0  13   7   10.67    0.98
   1  13  -7    4.19    0.72
  -1 -13  -7    3.72    0.81
   1  13  -7    3.55    0.69
  -1  13   7    4.92    0.77
   1  13   7    4.30    0.93
   1 -13  -7    3.18    0.80
  -1  13  -7    4.68    0.52
  -1  13  -7    4.96    1.55
  -1  13  -7    4.83    0.48
  -2 -13  -7   13.46    1.23
  -2  13   7   13.85    1.09
   2  13  -7   14.29    1.19
   2  13  -7   14.48    0.98
   2 -13  -7   16.00    1.39
   2  13   7   13.69    1.26
  -2  13  -7   14.36    1.27
   3  13  -7   19.31    1.45
  -3  13   7   20.21    1.66
  -3  13   7   17.99    1.22
  -3 -13  -7   18.79    1.42
  -3 -13   7   18.02    0.72
  -3  13  -7   18.17    1.52
  -3 -13   7   17.62    0.74
   3 -13  -7   17.31    1.53
   3  13   7   18.70    1.50
  -4 -13  -7   17.44    1.35
   4  13  -7   13.39    1.38
  -4  13   7   15.39    1.59
   4 -13  -7   12.01    1.02
   4  13   7   13.74    1.40
  -4  13  -7   15.14    1.47
  -5 -13  -7    3.68    0.80
  -5  13   7    6.34    1.30
   5  13  -7    3.72    0.96
  -5  13  -7    1.69    0.79
   5  13   7    3.04    0.88
   6  13  -7    1.80    0.85
  -6 -13  -7    1.66    0.65
  -6  13   7    0.74    0.86
   6  13   7    1.56    0.82
   6 -13  -7    2.06    0.54
  -6  13  -7    2.45    0.96
  -7 -13  -7    3.57    0.97
  -7  13   7    1.41    1.06
   7  13  -7    1.43    0.91
  -7  13  -7    1.46    0.94
   7  13   7    2.25    0.92
   8  13  -7   -0.28    1.04
  -8  13   7    3.23    1.35
  -8  13  -7    0.66    1.05
   8  13   7    1.95    1.10
   0  14  -7   14.00    0.96
   0  14   7   14.17    1.21
   0 -14  -7   12.05    1.24
   0  14  -7   11.24    0.96
   0  14  -7   13.82    1.17
  -1 -14  -7    4.80    0.87
   1  14  -7    4.88    0.78
   1  14  -7    3.46    0.76
  -1  14   7    4.40    0.76
  -1  14  -7    2.95    0.75
  -1  14  -7    4.11    0.52
  -1  14  -7    3.81    0.47
   1  14   7    3.48    0.76
   1 -14  -7    3.80    0.87
   2  14  -7   27.09    1.48
  -2  14   7   32.03    1.68
  -2 -14  -7   29.58    1.84
   2  14  -7   30.83    2.39
   2 -14  -7   29.27    1.98
   2  14   7   28.19    1.85
  -2  14  -7   27.22    1.79
   3  14  -7   20.78    1.53
  -3 -14  -7   20.16    1.52
  -3  14   7   21.13    1.31
   3  14   7   19.01    1.61
  -3 -14   7   18.73    0.83
   3 -14  -7   20.69    1.72
  -3  14  -7   18.79    1.55
  -4  14   7   13.30    1.66
  -4 -14  -7   16.00    1.33
   4  14  -7   15.42    1.49
   4  14   7   16.07    1.52
  -4  14  -7   13.32    1.48
  -5 -14  -7   34.66    1.94
  -5  14   7   29.46    2.45
   5  14  -7   27.77    2.14
  -5  14  -7   28.39    2.32
   5  14   7   23.97    2.22
   6  14  -7    8.71    1.49
  -6  14   7    7.75    1.60
  -6 -14  -7    7.99    1.20
   6 -14  -7    7.06    1.10
  -6  14  -7    8.32    1.46
   6  14   7    7.76    1.44
   7  14  -7    0.47    0.99
  -7 -14  -7    0.07    0.79
  -7  14   7    4.25    1.26
   7  14   7    0.02    0.87
  -7  14  -7    3.24    1.11
   8  14  -7    0.07    1.04
  -8  14   7    3.22    1.37
   8  14   7    1.95    1.18
  -8  14  -7    1.65    1.22
   0  15  -7    0.36    0.52
   0  15  -7    0.23    0.53
   0  15   7   -0.54    0.57
   0  15  -7    0.33    0.40
   0 -15  -7    0.18    0.46
  -1  15   7   21.52    1.45
   1  15  -7   22.20    1.44
  -1 -15  -7   21.05    1.63
   1  15  -7   18.38    1.32
   1  15   7   18.92    1.49
  -1  15  -7   22.99    0.91
  -1  15  -7   21.63    1.57
  -1  15  -7   19.27    0.91
   1 -15  -7   24.10    1.85
  -2  15   7   32.25    1.70
   2  15  -7   33.86    1.83
  -2 -15  -7   29.06    1.91
   2  15   7   33.92    2.07
   2 -15  -7   35.41    2.28
  -2 -15   7   29.64    1.50
  -2  15  -7   29.90    1.99
   3  15  -7    6.02    1.01
  -3 -15  -7    5.93    1.01
  -3  15   7    4.52    0.76
  -3  15  -7    5.41    1.08
   3 -15  -7    6.36    1.17
  -3 -15   7    5.90    0.66
   3  15   7    5.87    1.03
  -4  15   7    4.75    1.38
  -4 -15  -7    4.51    0.97
   4  15  -7    5.26    1.08
  -4  15  -7    4.88    1.11
   4 -15  -7    3.65    1.17
   4  15   7    4.74    1.08
  -5 -15  -7   24.53    1.66
  -5  15   7   21.06    2.18
   5  15  -7   23.99    2.79
  -5  15  -7   18.82    1.86
   5  15   7   22.00    1.90
   6  15  -7   11.19    1.70
  -6 -15  -7    8.95    1.32
  -6  15   7   11.15    1.83
   6  15   7    8.01    1.61
  -6  15  -7    9.95    1.61
   7  15  -7    2.12    1.08
  -7  15   7    6.18    1.54
  -7 -15  -7    2.67    1.01
   7  15   7    5.43    1.26
  -7  15  -7    4.94    1.34
   0 -16  -7   17.29    1.59
   0  16  -7   13.05    1.44
   0  16  -7   16.51    1.03
   0  16   7   15.95    1.35
   0  16  -7   17.50    1.41
  -1  16   7    9.46    1.04
   1  16  -7   10.38    1.15
  -1 -16  -7   10.54    1.26
   1  16  -7   10.78    1.04
  -1  16  -7    9.25    1.23
   1 -16  -7    8.03    1.26
   1  16   7   10.39    1.21
  -1  16  -7    8.30    0.56
  -1  16  -7    8.84    0.68
  -2  16   7   12.47    1.14
  -2 -16  -7   13.02    1.35
   2  16  -7   11.27    1.21
   2  16   7   14.64    1.42
  -2 -16   7   11.38    1.02
   2 -16  -7   11.38    1.52
  -2  16  -7   10.44    1.30
  -3  16   7   15.52    1.20
   3  16  -7   15.42    1.47
  -3 -16  -7   18.17    1.54
   3 -16  -7   17.14    1.77
   3  16   7   16.96    1.61
  -3  16  -7   17.57    1.68
  -4 -16  -7    6.62    1.11
   4  16  -7    5.93    1.21
  -4  16  -7    7.50    1.34
   4  16   7    7.91    1.35
   4 -16  -7    2.77    1.07
  -5 -16  -7   16.11    1.46
  -5  16   7   13.52    1.97
   5  16  -7   15.41    1.80
  -5  16  -7   13.05    1.75
   5  16   7   14.59    1.72
  -6  16   7   17.77    2.20
   6  16  -7   17.00    1.91
  -6 -16  -7   17.43    1.64
  -6  16  -7   13.31    1.95
   6  16   7   13.14    1.81
   7  16  -7   -0.28    0.89
  -7  16   7    0.32    1.37
  -7  16  -7   -0.90    1.45
   7  16   7    1.02    1.30
   0 -17  -7    0.95    0.69
   0  17  -7    0.87    0.61
   0  17   7    1.51    0.67
   0  17  -7    0.50    0.45
  -1  17   7   21.85    1.57
   1  17  -7   19.21    1.55
  -1 -17  -7   19.74    1.68
   1  17  -7   20.66    1.33
  -1  17  -7   18.89    1.59
   1 -17  -7   19.46    1.76
   1  17   7   19.40    1.61
  -2  17   7   26.89    1.64
  -2 -17  -7   25.39    1.98
   2  17  -7   25.07    1.69
   2  17   7   26.67    2.01
  -2 -17   7   27.21    1.59
   2 -17  -7   24.85    2.16
  -2  17  -7   27.59    2.00
   3  17  -7    0.11    0.74
  -3 -17  -7    0.68    0.71
  -3  17   7    0.56    0.59
   3 -17  -7    0.57    0.80
  -3  17  -7    1.38    0.71
   3  17   7    0.77    0.69
  -3 -17   7    0.88    0.53
  -4 -17  -7    2.34    0.86
   4  17  -7    2.68    0.91
   4  17   7    4.06    1.12
   4 -17  -7    2.41    0.99
  -4  17  -7    2.37    1.07
   5  17  -7    3.52    1.24
  -5 -17  -7    4.95    1.07
   5  17   7    8.25    1.62
   5 -17  -7    8.83    1.52
  -5  17  -7    7.23    1.57
   6  17  -7    8.24    1.60
  -6 -17  -7    4.61    1.16
  -6  17   7    7.28    1.91
   6  17   7    5.47    1.50
  -6  17  -7    8.87    1.71
   6 -17  -7    5.35    1.45
   0  18  -7    3.85    0.75
   0  18  -7    5.22    1.14
   0  18   7    3.92    0.88
   0 -18  -7    6.34    1.31
   1  18  -7   13.23    1.57
  -1 -18  -7   19.10    1.77
  -1  18   7   17.48    1.54
   1  18  -7   16.53    1.50
  -1  18  -7   17.45    1.66
   1  18   7   16.18    1.57
  -2  18   7    3.46    0.79
   2  18  -7    2.69    0.88
  -2 -18  -7    3.80    0.93
   2 -18  -7    3.17    1.02
   2  18   7    2.69    0.87
  -2  18  -7    3.28    0.99
  -2 -18   7    2.44    0.80
  -3 -18  -7    1.52    0.87
   3  18  -7    2.47    0.92
   3  18   7    1.71    1.01
   3 -18  -7    2.72    1.03
  -3 -18   7    1.89    0.74
  -3  18  -7    4.08    1.03
   4  18  -7    1.83    0.82
  -4 -18  -7    1.32    0.88
  -4  18  -7    4.13    1.22
   4 -18  -7    1.78    1.03
   4  18   7    1.84    1.03
  -5 -18  -7    3.87    0.98
   5  18  -7    2.88    1.07
   5  18   7    4.66    1.25
  -5  18  -7    5.14    1.50
   5 -18  -7    5.26    1.29
   6  18  -7    9.69    1.85
  -6  18  -7    5.90    1.62
   6 -18  -7    9.11    1.84
   6  18   7    6.26    1.48
   0  19   7    3.15    0.83
   0  19  -7    3.72    1.02
   0 -19  -7    4.28    0.97
   0  19  -7    3.53    0.75
  -1  19   7   10.28    1.31
   1  19  -7    8.47    1.15
  -1 -19  -7    8.96    1.60
   1 -19  -7   11.62    1.61
  -1  19  -7    7.17    1.52
  -1 -19   7   10.83    1.32
   1  19   7    9.80    1.40
  -2 -19  -7   10.37    1.36
   2  19  -7    5.38    1.19
  -2  19   7    7.06    1.40
   2 -19  -7    7.21    1.52
   2  19   7    7.12    1.35
  -2  19  -7    7.25    1.42
  -2 -19   7    8.75    1.66
   3  19  -7   -0.33    0.82
  -3 -19  -7   -0.23    0.89
   3 -19  -7    0.51    0.91
  -3  19  -7    0.57    0.76
   3  19   7    0.30    0.80
  -4 -19  -7    5.63    1.28
   4  19  -7    3.72    1.22
   4  19   7    3.63    1.17
   4 -19  -7    5.17    1.40
  -4  19  -7    5.48    1.32
   5  19  -7    0.84    0.99
  -5 -19  -7    0.59    1.01
  -5  19  -7    1.74    1.29
   5 -19  -7   -0.87    1.35
   5  19   7    0.76    1.09
   0  20  -7   30.10    2.22
   0 -20  -7   28.48    2.31
   0  20   7   26.99    2.02
  -1 -20  -7    0.88    0.98
   1  20  -7    0.71    0.83
  -1  20   7    1.28    0.98
  -1  20  -7    1.88    1.55
   1 -20  -7    1.46    1.05
   1  20   7    1.17    1.00
  -1 -20   7   -0.40    0.90
   2  20  -7    5.26    1.02
  -2 -20  -7    8.06    1.48
  -2 -20   7    6.93    1.39
   2  20   7    3.69    1.64
  -2  20  -7    9.37    1.68
   2 -20  -7    5.21    1.37
  -3 -20  -7   18.29    1.98
   3  20  -7   17.28    1.79
   3  20   7   19.24    1.97
  -3  20  -7   19.12    1.99
   3 -20  -7   15.08    2.22
  -4 -20  -7    0.95    1.30
   4  20  -7    1.24    1.04
  -4  20  -7   -0.68    0.96
   4 -20  -7    2.20    1.31
   4  20   7    0.93    1.12
   0 -21  -7    7.93    1.71
   0  21   7   10.23    1.70
   0  21  -7   11.16    1.86
  -1  21   7    8.56    1.89
  -1 -21  -7    8.75    1.86
  -1  21  -7   11.48    1.79
   1 -21  -7   12.25    1.83
  -1 -21   7   10.57    1.69
   1  21   7   13.29    1.79
   2  21  -7    3.61    1.13
  -2 -21  -7    2.45    1.26
   2 -21  -7    1.15    1.13
  -2  21  -7    0.44    1.01
   2  21   7    3.20    1.17
  -3 -21  -7    2.31    1.23
   3  21  -7    2.13    1.16
   3  21   7    3.46    1.32
  -3  21  -7    3.38    1.26
   3 -21  -7    4.34    1.31
   0 -22  -7   18.08    2.16
   0  22   7   18.18    3.98
   0 -22   7   16.79    1.99
  -1 -22  -7    0.35    1.11
  -1 -22   7    2.28    1.41
   1  22   7    1.16    2.31
   1 -22  -7    0.19    1.26
  -1  22  -7    1.95    1.32
  -2 -22  -7    0.29    1.19
  -2  22  -7    2.20    1.39
   2 -22  -7    0.34    1.69
   2  22   7    2.75    1.28
   0   0  -8   52.75    1.78
   0   0   8   48.52    1.73
   0   0  -8   48.57    1.81
  -1   0   8   16.34    0.80
  -1   0   8   15.62    0.95
  -1   0  -8   15.34    0.86
  -1   0  -8   16.31    0.88
   1   0  -8   15.99    1.06
   1   0   8   16.11    0.86
   1   0  -8   15.31    0.79
   1   0   8   16.06    0.91
   2   0  -8    0.40    0.28
   2   0   8    0.32    0.23
  -2   0  -8    0.29    0.22
   2   0  -8    0.63    0.24
   2   0   8    0.57    0.26
   2   0  -8    0.40    0.20
  -3   0  -8   13.85    0.87
   3   0  -8   13.72    0.78
  -3   0  -8   16.25    1.00
   3   0  -8   15.58    0.79
   3   0   8   15.56    0.97
   4   0  -8    7.51    0.59
   4   0   8    7.30    0.74
  -4   0  -8    5.99    0.71
   4   0  -8    8.03    0.61
   5   0  -8    9.57    1.01
   5   0   8   10.15    0.94
  -5   0  -8   10.59    0.94
   5   0  -8   10.28    0.73
   6   0  -8    0.56    0.38
  -6   0  -8    0.44    0.45
   6   0   8    1.16    0.63
   6   0  -8    0.44    0.30
   7   0  -8   40.92    2.31
  -7   0  -8   41.03    2.19
   7   0  -8   37.74    1.73
   7   0   8   38.97    2.15
   8   0  -8   24.60    1.91
   8   0   8   20.93    1.65
  -8   0  -8   21.18    1.73
   8   0  -8   20.75    1.31
   9   0   8    0.88    0.80
  -9   0  -8   -0.20    1.07
   9   0  -8   -0.88    0.68
   9   0  -8   -0.45    0.60
  10   0  -8    2.67    1.16
  10   0   8    1.51    0.94
 -10   0  -8    2.53    1.14
   0  -1  -8  190.16    5.41
   0   1  -8  199.44    5.28
   0  -1  -8  205.57    5.38
   0   1   8  190.82    5.31
   0  -1   8  201.57    5.47
   0   1  -8  196.10    5.42
   0  -1   8  185.10    5.24
   0   1   8  206.31    5.53
  -1  -1  -8  214.95    5.95
   1   1  -8  222.54    6.37
  -1   1   8  217.24    5.83
   1  -1   8  207.98    5.85
  -1  -1  -8  221.79    5.95
   1   1  -8  226.72    5.98
   1  -1   8  218.82    5.95
  -1   1  -8  214.27    5.78
  -1  -1   8  210.89    5.61
   1  -1  -8  217.50    5.74
  -1   1  -8  207.49    5.77
  -1  -1   8  220.52    5.99
   1   1   8  215.50    5.90
  -2  -1  -8   15.12    0.91
   2  -1   8   14.86    0.89
   2  -1   8   15.74    0.90
   2   1  -8   16.48    0.76
  -2  -1  -8   16.06    0.95
  -2   1   8   17.75    1.06
   2  -1  -8   14.30    0.78
   2  -1  -8   16.27    0.87
   2   1   8   14.54    0.91
   2  -1  -8   13.71    0.93
   2   1   8   14.09    0.86
  -2  -1   8   15.10    0.73
  -2   1  -8   14.64    0.83
  -2   1  -8   16.11    0.92
  -3  -1  -8   58.02    2.16
  -3  -1  -8   55.34    2.12
   3   1  -8   55.92    1.81
   3  -1   8   56.58    2.09
   3   1  -8   56.48    1.83
   3  -1  -8   55.92    1.99
   3   1   8   61.92    2.26
  -3   1  -8   59.06    2.21
  -3   1  -8   56.05    2.06
   3  -1  -8   57.14    1.98
   4   1  -8   43.22    1.53
   4  -1   8   45.29    1.88
  -4  -1  -8   43.54    1.91
   4   1  -8   44.00    1.55
   4  -1  -8   43.55    1.89
   4  -1  -8   44.19    1.70
   4   1   8   43.81    1.95
  -4   1  -8   46.39    1.97
  -4   1  -8   42.91    2.04
  -5  -1  -8    2.80    0.58
   5   1  -8    2.40    0.43
   5  -1   8    3.35    0.60
   5   1  -8    2.18    0.41
   5  -1  -8    2.18    0.44
  -5   1  -8    2.80    0.61
   5  -1  -8    2.76    0.51
   5   1   8    2.25    0.54
   6  -1   8    9.56    0.97
  -6   1   8    8.95    0.85
  -6  -1  -8    9.12    0.96
   6   1  -8    9.02    0.72
   6   1  -8    9.44    0.90
   6   1  -8    8.79    1.07
  -6   1  -8    9.44    0.99
   6   1   8   11.04    1.09
  -7   1   8   38.12    1.88
   7   1  -8   43.36    2.40
   7   1  -8   35.59    1.58
   7   1  -8   36.47    1.61
  -7  -1  -8   37.10    2.10
   7  -1   8   39.10    2.05
   7  -1  -8   36.65    2.14
   7   1   8   33.49    2.01
  -7   1  -8   31.88    1.98
  -8  -1  -8   33.09    2.10
   8  -1   8   30.96    1.99
   8   1  -8   32.54    1.54
   8   1  -8   30.99    2.21
  -8   1  -8   29.93    2.00
   8   1   8   29.95    1.99
   8  -1  -8   29.79    2.07
   9  -1   8    2.08    0.72
   9   1  -8    0.11    0.74
  -9  -1  -8    0.05    0.82
   9   1  -8    1.58    0.89
   9  -1  -8    0.81    0.76
  -9   1  -8    0.46    0.71
   9  -1  -8   -0.43    0.63
   9   1   8    0.31    0.82
  10   1  -8    2.50    1.09
 -10  -1  -8    0.58    1.00
  10  -1   8    0.97    0.97
  10   1   8    2.97    1.21
  10  -1  -8    1.70    1.12
 -10   1  -8    2.90    1.14
   0   2   8  319.60    8.32
   0  -2   8  307.61    8.17
   0  -2   8  323.95    8.38
   0   2   8  332.65    8.51
   0  -2  -8  318.30    8.43
   0   2  -8  325.19    8.19
   0   2  -8  313.92    8.34
  -1  -2  -8  214.82    5.87
   1  -2   8  220.30    5.83
   1   2  -8  211.76    5.57
  -1   2   8  214.29    5.99
   1  -2   8  211.05    5.78
  -1   2   8  212.76    5.78
  -1   2  -8  214.64    5.74
  -1  -2   8  208.81    5.53
   1  -2  -8  214.56    5.75
  -1   2  -8  208.31    5.70
   1   2   8  212.76    5.91
   1  -2  -8  207.29    6.17
  -1  -2   8  220.35    5.94
  -2  -2  -8   97.33    3.13
   2   2  -8  106.80    2.79
   2   2  -8   96.54    3.28
   2  -2   8   92.01    3.07
   2  -2   8   97.92    3.02
  -2  -2  -8   94.90    3.12
  -2   2   8  102.00    3.29
   2  -2  -8   96.11    3.18
  -2   2  -8   94.35    2.94
  -2  -2   8  100.63    2.76
   2  -2  -8   96.65    3.03
   2  -2  -8   97.97    3.00
  -2   2  -8  100.50    3.11
   2   2   8   98.66    3.18
   3  -2   8   64.12    2.27
   3   2  -8   65.68    1.96
   3   2  -8   67.14    1.99
  -3  -2  -8   67.15    2.41
   3   2   8   70.98    2.53
   3  -2  -8   66.00    2.28
   3  -2  -8   65.12    2.29
  -3   2  -8   65.33    2.47
  -3   2  -8   68.64    2.46
   4   2  -8   27.06    1.04
   4   2  -8   27.48    1.04
   4  -2   8   30.20    1.41
  -4  -2  -8   29.47    1.48
   4  -2  -8   30.12    1.38
   4  -2  -8   28.83    1.36
  -4   2  -8   27.96    1.34
  -4   2  -8   30.76    1.55
   4   2   8   30.12    1.57
   5  -2   8    2.30    0.56
  -5  -2  -8    2.34    0.61
   5   2  -8    1.39    0.32
  -5   2   8    1.82    0.46
   5   2  -8    1.89    0.31
   5   2   8    2.99    0.71
  -5   2  -8    1.79    0.73
  -6  -2  -8   24.42    1.51
   6   2  -8   25.94    1.73
   6   2  -8   23.20    1.04
  -6   2   8   21.24    1.37
   6  -2   8   22.74    1.44
   6   2  -8   22.08    1.01
  -6   2  -8   26.07    1.61
   6   2   8   22.36    1.56
   7  -2   8   21.14    1.47
   7   2  -8   18.76    1.00
  -7   2   8   19.19    1.41
   7   2  -8   20.16    1.02
   7   2  -8   17.87    1.61
  -7  -2  -8   20.38    1.49
  -7   2  -8   16.81    1.50
   7  -2  -8   17.05    1.49
   7   2   8   20.58    1.59
   8  -2   8   26.80    1.79
  -8  -2  -8   30.75    1.97
   8   2  -8   27.46    1.26
  -8   2   8   27.46    1.75
   8   2  -8   29.34    2.15
  -8   2  -8   25.86    1.90
   8  -2  -8   22.60    1.82
   8   2   8   23.77    1.81
   9   2  -8    7.72    1.50
   9  -2   8    9.60    1.32
  -9  -2  -8    8.19    1.36
   9  -2  -8   11.05    1.31
   9   2   8    9.81    1.39
   9  -2  -8    9.78    1.46
  -9   2  -8    9.65    1.49
  10  -2   8    7.01    1.54
 -10  -2  -8    4.46    1.26
  10   2  -8    5.30    1.42
  10   2   8    5.10    1.41
 -10   2  -8    4.29    1.34
  10  -2  -8    5.91    1.38
   0   3  -8  264.70    6.80
   0   3   8  273.26    7.17
   0  -3  -8  266.22    7.03
   0   3  -8  255.93    6.95
   0  -3  -8  254.44    7.04
   0  -3   8  254.36    6.80
   0   3   8  259.86    7.02
   0  -3   8  267.36    7.00
  -1   3   8   57.46    2.10
  -1   3   8   53.46    2.09
   1  -3   8   53.79    1.90
   1   3  -8   52.51    2.26
  -1  -3  -8   55.72    2.01
   1   3  -8   53.47    1.70
  -1  -3  -8   51.76    1.98
   1  -3  -8   47.92    1.78
  -1   3  -8   45.37    1.65
  -1  -3   8   48.06    1.54
   1  -3  -8   45.88    1.79
  -1   3  -8   44.43    1.69
   2  -3   8   42.60    1.59
   2   3  -8   40.79    1.31
  -2   3   8   40.60    1.77
   2   3  -8   39.80    1.80
   2  -3   8   40.62    1.67
  -2  -3  -8   40.22    1.71
  -2  -3  -8   42.35    1.72
   2  -3  -8   37.30    1.62
  -2   3  -8   39.24    1.60
   2   3   8   33.54    1.52
   2  -3  -8   35.66    1.52
   2  -3  -8   37.81    1.58
  -2   3  -8   39.75    1.46
  -2  -3   8   38.64    1.25
   2   3   8   38.30    1.68
   3   3  -8   22.46    0.81
   3   3  -8   21.52    0.78
   3  -3   8   21.01    1.06
  -3  -3  -8   22.20    1.22
   3  -3  -8   20.56    1.09
   3  -3  -8   18.07    1.41
  -3   3  -8   18.51    0.95
  -3   3  -8   18.80    1.12
   3   3   8   19.77    1.20
   3  -3  -8   19.79    1.10
   4   3  -8    9.31    0.47
   4   3  -8    9.82    0.46
  -4  -3  -8    8.79    0.79
   4  -3   8    8.63    0.74
   4   3   8    8.27    0.84
  -4   3  -8    9.35    0.87
  -4   3  -8    9.29    0.73
   4  -3  -8    9.85    0.78
  -5  -3  -8   33.60    1.71
  -5   3   8   32.17    1.65
   5   3  -8   31.81    1.05
   5   3  -8   31.49    1.04
   5  -3   8   32.11    1.57
   5   3   8   31.68    2.72
  -5   3  -8   32.58    1.78
  -6   3   8   14.76    1.20
   6  -3   8   16.60    1.18
   6   3  -8   15.63    0.70
   6   3  -8   15.40    0.68
   6   3  -8   16.09    1.44
  -6  -3  -8   18.21    1.30
  -6   3  -8   16.68    1.38
   6   3   8   15.80    1.35
   7  -3   8   12.27    1.35
   7   3  -8   11.63    1.37
  -7   3   8   12.09    1.43
  -7  -3  -8   12.40    1.22
   7   3  -8   11.46    0.60
   7   3  -8   12.33    0.64
   7  -3  -8   12.20    1.23
   7   3   8   13.54    1.31
  -7   3  -8   12.19    1.31
   8  -3   8   30.41    1.87
  -8   3   8   25.80    1.79
   8   3  -8   26.25    0.95
  -8  -3  -8   29.70    1.91
   8   3  -8   25.08    2.20
   8   3   8   27.29    1.98
  -8   3  -8   25.77    1.98
   8  -3  -8   26.90    1.90
   9  -3   8    7.48    1.24
   9   3  -8    5.10    1.08
  -9  -3  -8    6.92    1.25
  -9   3  -8    3.88    1.06
   9   3   8    6.68    1.34
   9  -3  -8    6.34    1.21
 -10  -3  -8    9.22    1.55
  10   3  -8    8.07    1.65
  10  -3   8    7.86    1.56
  10   3   8    8.60    1.60
  10  -3  -8    9.01    1.68
 -10   3  -8    9.23    1.66
  10  -3  -8   11.83    1.58
   0  -4   8    2.14    0.39
   0   4   8    2.87    0.43
   0  -4   8    2.12    0.31
   0  -4  -8    2.39    0.41
   0  -4  -8    2.78    0.41
   0   4  -8    1.96    0.35
   0   4   8    2.85    0.45
   0   4  -8    1.81    0.31
   1   4  -8  113.63    3.12
  -1  -4  -8  104.39    3.45
   1  -4   8  107.41    3.35
   1   4  -8  109.78    3.50
  -1   4   8  122.72    3.63
   1  -4   8  117.89    3.35
   1   4   8  112.50    3.49
   1  -4  -8  111.94    3.47
  -1   4  -8  115.16    3.31
  -1   4  -8  106.53    3.18
  -1  -4   8  108.58    3.04
   1  -4  -8  102.16    3.34
   1   4   8  103.66    3.33
   1  -4  -8  108.36    3.38
  -2  -4  -8  122.77    3.77
   2  -4   8  120.59    3.94
   2   4  -8  121.46    3.20
  -2   4   8  125.66    3.88
   2   4  -8  113.81    3.85
   2  -4   8  123.09    3.53
   2  -4  -8  112.09    3.60
   2   4   8  122.96    3.77
  -2  -4   8  116.01    3.08
  -2   4  -8  113.88    3.57
   2  -4  -8  117.29    3.60
   2   4   8  109.51    3.54
  -2   4  -8  116.63    3.33
   2  -4  -8  116.64    3.63
   3   4  -8   35.29    1.00
   3  -4   8   35.07    1.40
  -3  -4  -8   34.44    1.61
   3   4  -8   34.81    1.11
   3  -4  -8   32.93    1.85
  -3   4  -8   37.97    1.69
   3  -4  -8   35.26    1.58
  -3   4  -8   34.93    1.36
   3   4   8   37.61    1.76
  -4   4   8   86.80    3.14
  -4  -4  -8   87.86    3.08
   4  -4   8   87.82    2.82
   4   4   8   80.77    3.07
  -4   4  -8   77.54    2.80
  -4   4  -8   85.16    3.07
  -5  -4  -8   16.34    1.16
  -5   4   8   17.66    1.25
   5   4  -8   14.83    1.29
   5  -4   8   14.52    1.00
  -5   4  -8   13.48    0.92
   5   4   8   13.41    1.20
  -5   4  -8   14.22    1.19
   6   4  -8   23.99    1.76
   6  -4   8   23.65    1.41
  -6  -4  -8   26.52    1.54
  -6   4   8   21.74    1.54
  -6   4  -8   25.24    1.72
   6   4   8   24.24    1.72
   7   4  -8    3.94    0.91
   7  -4   8    5.16    0.81
  -7  -4  -8    3.92    0.82
  -7   4   8    4.78    0.94
   7  -4  -8    3.86    0.86
   7   4   8    4.40    0.89
  -7   4  -8    4.34    0.87
   8   4  -8    6.20    1.28
   8  -4   8    6.58    0.99
  -8   4   8    6.53    1.11
  -8  -4  -8    6.28    1.06
   8  -4  -8    4.65    1.01
  -8   4  -8    6.41    1.24
   8   4   8    7.50    1.16
  -9   4   8    7.05    1.35
   9   4  -8    8.47    1.55
   9  -4   8    8.68    1.31
  -9  -4  -8    6.23    1.31
  -9   4  -8    8.15    1.42
   9  -4  -8   10.25    2.70
   9   4   8    7.60    1.26
  10  -4   8    1.90    1.08
  10   4  -8    2.48    1.28
 -10  -4  -8    1.77    1.09
  10  -4  -8    2.26    1.16
  10   4   8    5.46    1.53
 -10   4  -8    4.41    1.42
  10  -4  -8    3.17    1.35
   0   5  -8   14.03    0.83
   0  -5  -8   13.99    0.91
   0   5  -8   15.10    0.78
   0  -5  -8   10.62    0.81
   0   5   8   14.27    0.95
   0   5   8   12.59    0.84
   0  -5   8   13.70    0.76
   1  -5   8   50.07    1.78
  -1  -5  -8   46.64    1.94
   1  -5   8   51.20    1.88
   1   5  -8   48.55    1.95
  -1   5   8   52.54    2.03
   1   5  -8   52.36    1.64
   1  -5  -8   52.25    2.06
  -1   5  -8   51.77    1.89
   1   5   8   50.68    2.04
  -1   5  -8   48.62    1.75
   1  -5  -8   52.86    1.96
   1  -5  -8   51.17    1.99
   1   5   8   48.01    1.94
  -1  -5   8   51.39    1.65
   2  -5   8  135.33    4.40
  -2  -5  -8  132.82    4.06
   2   5  -8  127.92    3.42
  -2   5   8  130.46    4.10
   2  -5  -8  122.72    3.87
  -2   5  -8  127.16    3.51
   2   5   8  129.96    4.03
   2  -5  -8  111.02    3.75
  -2   5  -8  133.13    3.91
  -2  -5   8  124.50    3.28
  -3  -5  -8   10.05    0.81
   3  -5   8   10.13    0.67
  -3   5   8    9.67    0.85
   3  -5  -8    9.32    0.79
   3   5   8    8.26    0.80
  -3   5  -8    8.74    0.58
   3  -5  -8    8.02    0.86
  -3   5  -8    8.68    0.80
  -4   5   8    3.27    0.61
  -4  -5  -8    3.84    0.58
   4  -5   8    4.26    0.52
  -4   5  -8    2.31    0.43
   4   5   8    3.02    0.68
  -4   5  -8    2.14    0.57
  -5  -5  -8   34.74    1.73
   5   5  -8   29.25    1.83
   5  -5   8   31.61    1.47
  -5   5   8   30.54    1.75
   5   5   8   29.31    1.79
  -5   5  -8   30.29    1.75
  -5   5  -8   25.85    1.24
  -6   5   8   36.78    2.02
   6  -5   8   33.02    1.63
   6   5  -8   37.80    2.23
  -6  -5  -8   33.72    1.83
  -6   5  -8   28.18    1.88
   6   5   8   29.22    1.92
  -7   5   8    0.40    0.56
   7   5  -8   -0.09    0.52
  -7  -5  -8    0.38    0.44
   7  -5   8    0.73    0.47
   7  -5  -8   -0.10    0.49
   7   5   8    0.15    0.42
  -7   5  -8    0.00    0.58
  -8   5   8    4.67    1.08
  -8  -5  -8    4.20    0.90
   8   5  -8    3.66    1.09
   8  -5   8    4.59    0.98
   8   5   8    2.95    1.28
   8  -5  -8    4.59    1.02
  -8   5  -8    2.79    1.42
   9  -5   8    8.48    1.28
  -9   5   8    5.87    1.30
   9   5  -8    5.17    1.18
  -9  -5  -8    6.97    1.33
   9   5   8    6.82    1.34
  -9   5  -8    3.82    1.20
   9  -5  -8    4.68    1.15
 -10  -5  -8    3.71    1.36
  10   5  -8    2.65    1.70
  10  -5  -8    3.85    1.32
  10   5   8    5.72    1.45
 -10   5  -8    2.51    1.28
  10  -5  -8    2.82    1.16
   0   6  -8    7.31    0.61
   0  -6   8    7.33    0.55
   0  -6  -8    7.52    0.65
   0   6  -8    7.75    0.59
   0  -6  -8    7.49    0.69
   0   6   8    6.93    0.68
  -1  -6  -8   36.01    1.65
   1  -6   8   38.12    1.55
  -1   6   8   36.14    1.66
   1   6  -8   35.98    1.61
   1   6   8   38.03    1.71
  -1   6  -8   39.08    1.59
  -1   6  -8   37.82    1.42
   1  -6  -8   34.13    1.55
  -1  -6   8   36.47    1.33
   1  -6  -8   38.82    1.71
  -2   6   8   34.04    1.61
  -2  -6  -8   33.31    1.59
   2  -6   8   35.04    1.31
   2   6  -8   32.98    1.09
  -2  -6   8   31.67    1.05
  -2   6  -8   35.35    1.58
   2  -6  -8   29.35    1.45
   2   6   8   33.79    1.67
   2  -6  -8   33.46    1.61
  -2   6  -8   31.50    1.20
  -3   6   8   26.57    1.44
   3  -6   8   25.66    1.09
  -3  -6  -8   26.30    1.41
   3   6   8   22.12    1.36
  -3   6  -8   21.86    1.31
   3  -6  -8   21.47    1.29
  -3   6  -8   21.44    0.92
   4   6  -8   16.76    1.52
   4  -6   8   15.66    0.85
  -4   6   8   14.34    1.18
  -4  -6  -8   15.75    1.10
  -4   6  -8   13.71    1.11
  -4   6  -8   12.70    0.74
   4   6   8   15.19    1.24
   5  -6   8   55.67    2.05
   5   6  -8   58.32    2.73
  -5  -6  -8   59.00    2.45
  -5   6   8   61.92    3.01
   5   6   8   55.62    2.64
  -5   6  -8   56.63    2.59
  -5   6  -8   53.37    1.89
   6   6  -8    4.88    1.02
   6  -6   8    5.04    0.68
  -6  -6  -8    4.64    0.78
  -6   6   8    3.84    0.88
  -6   6  -8    5.09    0.95
   6   6   8    5.11    0.92
   7   6  -8    3.16    1.06
   7  -6   8    1.81    0.53
  -7   6   8    1.93    0.69
  -7  -6  -8    0.98    0.56
   7  -6  -8    1.97    0.54
  -7   6  -8    1.46    0.75
   7   6   8    0.67    0.61
   8  -6   8   -0.90    0.55
   8   6  -8    0.80    0.72
  -8  -6  -8   -0.10    0.61
  -8   6   8   -1.35    0.65
   8  -6  -8    0.19    0.58
   8   6   8    0.90    0.70
  -8   6  -8   -0.27    0.66
   9  -6   8   13.47    1.41
  -9  -6  -8   15.04    1.55
   9   6  -8   16.25    1.99
  -9   6   8   17.56    2.05
   9   6   8   11.87    1.69
   9  -6  -8   14.49    1.59
  -9   6  -8   19.79    1.97
   0   7   8    0.64    0.37
   0  -7  -8    0.27    0.35
   0   7  -8    0.55    0.31
   0  -7  -8    0.91    0.35
   0   7  -8    0.56    0.24
   1  -7   8   57.51    2.16
  -1  -7  -8   62.65    2.37
  -1   7   8   59.14    2.32
   1   7  -8   61.69    1.95
   1   7  -8   59.17    2.26
  -1   7  -8   59.46    1.96
   1  -7  -8   54.90    2.15
  -1   7  -8   58.38    2.15
   1  -7  -8   57.26    2.30
  -1  -7   8   57.46    1.87
   1   7   8   59.41    2.33
  -2  -7  -8  125.08    4.00
   2   7  -8  123.45    3.31
  -2   7   8  126.85    4.02
   2  -7  -8  121.28    3.98
  -2   7  -8  122.65    3.89
   2  -7  -8  118.21    3.75
  -2   7  -8  121.91    3.36
  -2  -7   8  119.68    3.22
   2   7   8  125.52    4.07
  -3   7   8   65.12    2.51
  -3  -7  -8   60.37    2.43
   3  -7   8   63.55    1.96
   3   7   8   67.48    2.69
  -3   7  -8   60.60    1.87
  -3   7  -8   64.45    2.56
   3  -7  -8   60.32    2.51
  -4   7   8   25.02    1.68
  -4  -7  -8   26.79    1.48
   4  -7   8   25.68    1.08
   4   7  -8   27.15    1.65
  -4   7  -8   24.57    0.96
   4   7   8   26.12    1.63
  -4   7  -8   23.96    1.55
  -5   7   8   22.06    1.61
  -5  -7  -8   22.88    1.46
   5   7  -8   25.66    1.77
   5  -7   8   25.06    1.13
   5   7   8   25.05    1.70
  -5   7  -8   23.91    1.69
  -6  -7  -8   31.55    1.77
  -6   7   8   30.67    1.98
   6  -7   8   31.69    1.41
   6   7  -8   31.53    2.08
   6   7   8   28.14    1.97
  -6   7  -8   27.39    1.92
   7   7  -8    4.01    0.96
   7  -7   8    3.04    0.69
  -7  -7  -8    4.98    0.94
  -7   7   8    4.94    1.04
   7   7   8    8.12    1.23
  -7   7  -8    4.40    1.07
   7  -7  -8    3.55    0.81
  -8  -7  -8    3.92    0.94
   8   7  -8    8.29    1.42
  -8   7   8    4.88    1.05
   8  -7   8    5.98    0.95
   8  -7  -8    4.88    1.07
  -8   7  -8    6.78    1.34
   8   7   8    5.44    1.23
   9   7  -8    1.71    1.07
  -9  -7  -8    4.76    1.06
  -9   7   8    3.70    1.19
   9   7   8    5.10    1.29
   9  -7  -8    2.78    0.98
  -9   7  -8    3.20    1.10
   0   8  -8    7.82    0.66
   0   8   8    9.27    0.83
   0  -8   8    8.48    0.66
   0  -8  -8   10.08    0.85
   0   8  -8    9.91    0.73
  -1   8   8   69.13    2.59
   1   8  -8   71.30    2.22
   1   8  -8   64.81    2.47
  -1  -8  -8   70.22    2.64
   1  -8  -8   66.68    2.59
  -1   8  -8   64.10    2.13
  -1   8  -8   69.09    2.43
  -1  -8   8   66.37    2.11
   1  -8  -8   58.89    2.62
   1   8   8   67.56    2.58
  -2   8   8   36.48    1.74
   2   8  -8   36.41    1.24
  -2  -8  -8   37.49    1.77
   2   8   8   38.88    1.89
  -2  -8   8   36.26    1.21
  -2   8  -8   36.45    1.25
   2  -8  -8   35.10    1.79
   2  -8  -8   35.18    1.73
  -2   8  -8   37.38    1.75
  -3  -8  -8   61.11    2.44
  -3   8   8   58.84    2.41
   3   8  -8   58.09    2.47
   3   8   8   57.69    2.70
  -3   8  -8   58.31    2.44
  -3   8  -8   55.55    1.61
   3  -8  -8   53.55    2.40
  -4   8   8   49.17    2.50
   4   8  -8   54.11    2.51
   4  -8   8   56.18    1.63
  -4  -8  -8   55.18    2.32
  -4   8  -8   54.65    2.49
   4   8   8   49.39    2.44
   5   8  -8   16.68    1.44
  -5  -8  -8   17.18    1.25
   5  -8   8   15.53    0.76
  -5   8   8   15.19    1.38
  -5   8  -8   17.67    1.41
   5   8   8   15.81    1.41
  -6  -8  -8   15.29    1.24
  -6   8   8   13.72    1.39
   6   8  -8   13.22    1.43
   6   8   8   12.78    1.36
  -6   8  -8    9.48    1.22
   7  -8   8    0.35    0.42
  -7  -8  -8    0.05    0.49
   7   8  -8   -0.77    1.02
  -7   8   8    0.37    0.65
  -7   8  -8    1.71    0.83
   7   8   8    0.74    0.77
   7  -8  -8    0.46    0.53
  -8  -8  -8   28.48    1.87
  -8   8   8   27.11    2.11
   8   8  -8   28.34    2.34
  -8   8  -8   33.02    2.39
   8   8   8   29.44    2.33
   8  -8  -8   29.25    1.89
   9   8  -8    7.08    1.62
  -9   8   8   10.87    1.77
  -9  -8  -8    9.31    1.42
   9  -8  -8    7.52    1.38
   9   8   8    9.15    1.61
  -9   8  -8    6.90    1.67
   0   9  -8   24.80    1.22
   0  -9   8   22.08    1.14
   0  -9  -8   23.99    1.42
   0   9  -8   22.10    1.59
   0   9   8   24.24    1.38
  -1   9   8   19.92    1.22
  -1  -9  -8   19.46    1.29
   1   9  -8   18.58    1.17
   1   9  -8   21.16    1.03
  -1   9  -8   20.58    1.21
   1   9   8   21.62    1.31
   1  -9  -8   19.18    1.29
  -1  -9   8   19.32    0.95
  -1   9  -8   19.02    0.94
  -2  -9  -8   20.50    1.31
   2   9  -8   20.91    1.25
  -2   9   8   22.16    1.30
   2   9  -8   20.19    0.90
   2  -9  -8   21.24    1.39
  -2  -9   8   19.13    0.83
  -2   9  -8   19.88    0.79
  -2   9  -8   20.51    1.31
   2   9   8   21.40    1.40
   3   9  -8   81.33    3.15
  -3  -9  -8   84.18    3.10
  -3   9   8   84.02    3.04
   3   9   8   80.13    3.25
  -3   9  -8   84.07    3.21
   4   9  -8   29.43    1.83
  -4   9   8   27.93    1.83
  -4  -9  -8   30.87    1.68
   4   9   8   30.58    1.88
  -4   9  -8   27.32    1.77
  -5  -9  -8    3.30    1.30
   5   9  -8    2.98    0.81
  -5   9   8    3.49    0.82
   5   9   8    2.73    0.72
  -5   9  -8    1.75    0.63
   6   9  -8   12.52    1.37
  -6   9   8   11.57    1.33
  -6  -9  -8   14.17    1.20
  -6   9  -8   13.25    1.39
   6   9   8   11.37    1.41
   7   9  -8   11.09    1.57
  -7   9   8   11.07    1.52
  -7  -9  -8    8.14    1.13
   7  -9  -8    9.36    1.06
  -7   9  -8    9.02    1.42
   7   9   8    8.01    1.31
  -8   9   8   11.00    1.74
  -8  -9  -8   13.16    1.41
   8   9  -8   14.28    1.77
  -8   9  -8    9.49    1.61
   8   9   8    9.36    1.53
   8  -9  -8   12.79    1.35
  -9  -9  -8    3.15    1.12
  -9   9   8    2.92    1.23
   9   9  -8    5.85    1.55
  -9   9  -8    4.57    1.29
   9  -9  -8    4.74    1.06
   9   9   8    2.51    1.14
   0  10  -8   27.79    1.23
   0  10  -8   27.20    1.37
   0 -10  -8   25.28    1.51
   0  10   8   27.00    1.54
   0  10  -8   26.39    1.28
  -1  10   8   24.15    1.39
  -1 -10  -8   22.30    1.43
   1  10  -8   22.42    1.12
   1  10  -8   22.61    1.24
  -1  10  -8   20.55    0.98
   1 -10  -8   20.37    1.45
  -1 -10   8   21.00    1.42
  -1  10  -8   19.34    0.96
   1  10   8   21.88    1.38
  -1  10  -8   23.47    1.32
  -2 -10  -8   10.62    0.99
   2  10  -8    8.90    0.87
  -2  10   8    9.84    0.90
  -2  10  -8    8.48    0.43
  -2  10  -8    7.90    0.44
  -2  10  -8    7.49    0.90
  -2 -10   8    7.89    0.54
   2 -10  -8    7.89    0.87
   2  10   8    8.20    0.93
  -3  10   8   27.09    1.52
   3  10  -8   24.77    1.63
  -3 -10  -8   27.93    1.61
   3 -10  -8   24.81    1.66
   3  10   8   26.36    1.71
  -3  10  -8   24.80    1.60
  -4  10   8   41.56    2.41
  -4 -10  -8   48.15    2.24
   4  10  -8   45.05    2.36
   4  10   8   38.88    2.22
  -4  10  -8   42.34    2.24
   5  10  -8    1.81    0.69
  -5  10   8    1.73    0.68
  -5 -10  -8    1.00    0.51
  -5  10  -8    0.98    0.64
   5  10   8    1.34    0.69
  -6  10   8    1.00    0.62
   6  10  -8    2.22    0.85
  -6 -10  -8    2.40    0.68
  -6  10  -8    1.46    0.75
   6  10   8    2.14    0.65
   7  10  -8    3.77    1.00
  -7  10   8    4.22    1.14
  -7 -10  -8    4.91    0.96
   7  10   8    4.83    1.25
  -7  10  -8    3.73    1.11
   7 -10  -8    4.96    0.95
  -8  10   8    5.40    1.30
  -8 -10  -8    6.69    1.18
   8  10  -8    6.34    1.43
  -8  10  -8    6.67    1.46
   8 -10  -8    5.17    1.03
   8  10   8    6.57    1.53
   9  10  -8    0.93    1.33
  -9 -10  -8   -0.16    2.00
  -9  10   8   -0.92    1.01
  -9  10  -8   -0.25    1.05
   0  11  -8  119.27    3.90
   0  11  -8  135.09    4.14
   0  11   8  134.64    4.39
   0  11  -8  131.60    3.87
   0 -11  -8  135.75    4.58
   1  11  -8   23.18    1.28
  -1 -11  -8   20.34    1.64
  -1  11   8   23.42    1.38
   1  11  -8   22.54    1.20
  -1  11  -8   22.57    1.38
  -1  11  -8   21.46    0.99
  -1 -11   8   21.73    1.12
   1  11   8   19.86    1.38
  -1  11  -8   22.04    1.02
   1 -11  -8   20.93    1.50
  -2  11   8    2.70    0.59
   2  11  -8    2.53    0.59
   2  11  -8    2.41    0.48
  -2 -11  -8    2.76    0.69
  -2  11  -8    2.44    0.34
  -2 -11   8    2.08    0.43
  -2  11  -8    2.11    0.22
   2  11   8    2.31    0.66
  -2  11  -8    2.44    0.62
   2 -11  -8    2.76    0.75
   3  11  -8    9.64    1.07
  -3 -11  -8   10.40    1.63
  -3  11   8   11.24    1.00
   3 -11  -8   10.70    1.16
   3  11   8    8.72    1.07
  -3  11  -8   10.36    1.13
  -4 -11  -8    9.12    0.98
  -4  11   8   11.67    1.30
   4  11  -8    9.65    1.15
   4  11   8   10.71    1.19
  -4  11  -8   11.12    1.24
  -5  11   8    7.06    1.23
  -5 -11  -8    6.57    0.95
   5  11  -8    6.58    1.11
  -5  11  -8    6.57    1.11
   5  11   8    7.29    1.13
  -6  11   8    3.13    1.06
   6  11  -8    2.26    0.85
  -6 -11  -8    3.87    0.80
   6  11   8    4.54    1.26
  -6  11  -8    3.97    1.20
  -7 -11  -8   23.08    1.59
   7  11  -8   24.68    2.17
  -7  11   8   26.76    2.24
   7 -11  -8   24.40    1.91
  -7  11  -8   24.07    2.06
   7  11   8   18.03    1.90
   8  11  -8    7.85    1.70
  -8 -11  -8   10.17    1.39
  -8  11   8    9.59    1.76
  -8  11  -8    9.92    1.83
   8 -11  -8    7.67    1.23
   8  11   8    8.04    1.59
   9  11  -8   -0.04    0.87
   9  11   8    2.32    1.29
   0  12  -8  146.15    4.21
   0  12  -8  129.32    4.22
   0  12   8  148.35    4.77
   0 -12  -8  146.48    4.89
   0  12  -8  149.82    4.56
   1  12  -8   53.44    2.12
  -1 -12  -8   48.30    2.38
   1  12  -8   52.45    2.06
  -1  12   8   48.94    2.22
   1 -12  -8   52.22    2.53
  -1  12  -8   54.42    1.93
  -1 -12   8   49.66    1.96
  -1  12  -8   52.50    2.34
  -1  12  -8   52.11    1.81
   1  12   8   55.29    2.57
  -2  12   8   12.07    1.06
   2  12  -8   13.70    0.87
   2  12  -8   12.24    1.06
  -2 -12  -8   11.65    1.14
  -2 -12   8   12.54    0.74
   2  12   8   13.33    1.23
  -2  12  -8   13.16    1.19
   2 -12  -8   11.36    1.25
  -3 -12  -8    6.45    0.88
   3  12  -8    6.90    0.94
  -3  12   8    7.11    0.87
  -3  12  -8    5.07    0.94
   3  12   8    5.38    0.93
   3 -12  -8    7.08    0.99
   4  12  -8    0.44    0.60
  -4  12   8    1.65    0.65
  -4 -12  -8    1.90    0.54
  -4  12  -8    1.45    0.62
   4  12   8    1.15    0.64
   5  12  -8   16.42    1.57
  -5 -12  -8   15.51    1.28
  -5  12   8   14.13    1.59
   5  12   8   13.96    1.49
  -5  12  -8   15.15    1.56
  -6 -12  -8   11.44    1.26
   6  12  -8   13.42    1.70
   6  12   8    9.08    1.42
  -6  12  -8   11.31    1.40
   7  12  -8   16.81    1.91
  -7  12   8   14.11    1.85
  -7 -12  -8   14.26    1.43
   7  12   8   16.39    1.86
  -7  12  -8   14.75    1.82
   7 -12  -8   14.02    1.26
   8  12  -8    7.86    1.70
  -8 -12  -8    7.24    1.44
  -8  12   8    8.73    1.88
   8  12   8   11.51    1.79
  -8  12  -8    7.25    1.53
   0  13  -8   44.02    2.05
   0  13   8   47.88    2.26
   0  13  -8   44.03    1.76
   0 -13  -8   47.70    2.37
   0  13  -8   39.61    1.79
  -1 -13  -8   86.04    3.40
   1  13  -8   79.57    2.92
  -1  13   8   81.87    3.15
   1  13  -8   81.37    2.93
   1  13   8   79.96    3.21
  -1  13  -8   71.73    2.41
  -1  13  -8   82.02    3.16
  -1  13  -8   82.78    3.01
   1 -13  -8   80.44    3.39
   2  13  -8   20.40    1.16
  -2 -13  -8   21.18    1.51
   2  13  -8   18.47    1.39
  -2  13   8   20.37    1.36
   2 -13  -8   20.07    1.60
  -2  13  -8   16.56    1.36
   2  13   8   20.03    1.53
   3  13  -8    2.05    0.67
  -3  13   8    1.85    0.59
  -3 -13  -8    2.57    0.78
  -3 -13   8    1.18    0.27
  -3  13  -8    1.59    0.64
   3 -13  -8    2.38    0.68
   3  13   8    2.17    0.66
  -3 -13   8    1.58    0.26
  -4  13   8    8.97    1.35
   4  13  -8    8.75    1.18
  -4 -13  -8   11.01    1.17
  -4  13  -8    7.88    1.19
   4 -13  -8    7.11    1.24
   4  13   8    8.79    1.20
  -5  13   8   12.59    1.65
   5  13  -8   13.06    1.52
  -5 -13  -8   18.47    1.49
  -5  13  -8   13.05    1.50
   5  13   8   14.26    1.52
   6  13  -8   14.16    1.64
  -6 -13  -8   12.47    1.30
  -6  13   8   14.44    1.82
   6  13   8   16.15    1.75
  -6  13  -8   13.33    1.64
  -7  13   8   16.13    2.02
   7  13  -8   12.51    1.76
  -7 -13  -8   12.18    1.35
  -7  13  -8   11.64    1.75
   7  13   8   15.02    1.90
  -8 -13  -8    3.47    1.95
  -8  13   8    4.18    1.37
   8  13  -8    5.02    1.33
   8  13   8    5.17    1.65
  -8  13  -8    8.03    1.70
   0  14  -8   25.10    1.29
   0  14  -8   26.61    1.41
   0 -14  -8   30.00    1.86
   0  14  -8   27.61    1.63
   1  14  -8   31.94    1.68
   1  14  -8   34.90    1.75
  -1  14   8   30.92    1.79
  -1 -14  -8   34.98    2.07
  -1  14  -8   32.51    1.90
   1 -14  -8   32.55    2.07
  -1  14  -8   29.84    1.25
   1  14   8   32.87    1.91
   2  14  -8   23.65    1.32
  -2  14   8   24.92    1.55
   2  14  -8   23.80    1.53
  -2 -14  -8   24.92    1.73
   2  14   8   23.84    1.72
   2 -14  -8   24.19    1.86
  -2  14  -8   22.49    1.68
  -3 -14  -8    2.29    0.78
  -3  14   8    3.76    0.80
   3  14  -8    1.62    0.59
  -3 -14   8    2.35    0.38
   3 -14  -8    3.60    1.00
   3  14   8    3.57    0.94
  -3 -14   8    2.56    0.42
  -3  14  -8    3.52    0.98
   4  14  -8    1.69    0.79
  -4 -14  -8    3.11    0.79
   4  14   8    1.63    0.84
  -4  14  -8    2.00    0.80
   4 -14  -8    4.32    1.21
   5  14  -8   10.16    1.44
  -5 -14  -8   10.81    1.20
  -5  14   8    7.75    1.49
  -5  14  -8   12.09    1.50
   5  14   8    8.31    1.34
   6  14  -8   24.96    2.13
  -6  14   8   22.31    2.21
  -6 -14  -8   22.69    1.72
  -6  14  -8   19.59    1.96
   6  14   8   22.79    2.08
   7  14  -8   10.07    1.67
  -7 -14  -8    9.98    1.44
  -7  14   8    8.64    1.83
  -7  14  -8   10.17    1.51
   7  14   8    9.15    1.69
   8  14  -8    7.46    1.61
  -8  14   8    4.28    2.23
  -8  14  -8    5.03    1.33
   8  14   8    4.58    1.39
   0  15  -8    0.59    0.56
   0 -15  -8    1.00    0.55
   0  15  -8    0.91    0.65
   0  15   8    0.42    0.51
   0  15  -8    0.71    0.40
  -1  15   8   40.94    2.10
  -1 -15  -8   40.44    2.31
   1  15  -8   38.19    1.87
   1  15  -8   39.38    1.98
  -1  15  -8   35.90    2.07
  -1  15  -8   32.19    1.32
   1 -15  -8   38.23    2.32
  -1  15  -8   35.00    1.35
   1  15   8   39.07    2.11
   2  15  -8    5.97    0.82
   2  15  -8    6.33    0.92
  -2 -15  -8    4.96    1.06
  -2  15   8    6.66    0.90
   2  15   8    5.78    1.05
   2 -15  -8    6.63    1.17
  -2  15  -8    7.09    1.09
   3  15  -8    0.74    0.55
  -3 -15  -8    0.32    0.60
  -3  15   8    1.07    0.60
   3 -15  -8    0.92    0.79
  -3 -15   8    1.28    0.38
  -3  15  -8    0.24    0.57
  -3 -15   8    1.02    0.42
   3  15   8    1.45    0.76
   4  15  -8    0.90    0.66
  -4 -15  -8    0.54    0.71
   4  15   8   -0.37    0.59
   4 -15  -8    1.65    0.93
  -4  15  -8   -0.10    0.52
  -5 -15  -8    3.90    0.98
   5  15  -8    2.32    0.96
  -5  15  -8    3.08    1.02
   5  15   8    2.39    1.05
   5 -15  -8    3.72    1.00
  -6 -15  -8    6.76    1.28
   6  15  -8    9.87    1.69
  -6  15   8   10.70    1.84
   6  15   8   10.80    1.67
   6 -15  -8    7.41    1.66
  -6  15  -8    8.49    1.55
   7  15  -8    0.06    1.02
  -7 -15  -8    2.99    1.16
  -7  15   8    2.22    1.20
   7 -15  -8    1.58    1.08
  -7  15  -8    1.14    1.07
   7  15   8    0.79    0.97
   0 -16  -8    0.13    0.48
   0  16  -8    0.87    0.45
   0  16   8    0.58    0.59
   0  16  -8    1.51    0.51
   1  16  -8   11.91    1.11
   1  16  -8   11.17    1.19
  -1 -16  -8   12.85    1.41
  -1  16  -8   11.93    0.82
  -1  16  -8   16.96    1.48
   1  16   8   13.65    1.39
  -1  16  -8   13.12    0.71
   1 -16  -8   14.71    1.58
  -2  16   8   31.86    1.80
  -2 -16  -8   31.34    2.04
   2  16  -8   31.72    1.87
  -2 -16   8   31.06    1.54
   2  16   8   30.54    2.03
   2 -16  -8   33.53    2.33
  -2  16  -8   33.04    2.08
  -3  16   8    1.90    0.74
  -3 -16  -8    2.79    0.82
   3  16  -8    1.89    0.72
  -3 -16   8    2.32    0.75
  -3  16  -8    0.94    0.67
   3  16   8    2.07    0.77
   4  16  -8   -1.34    0.62
  -4 -16  -8    0.49    0.72
  -4  16  -8   -0.06    0.67
   4  16   8   -0.61    0.77
   4 -16  -8   -0.14    0.68
   5  16  -8    6.83    1.48
  -5 -16  -8    9.43    1.29
  -5  16  -8    8.50    1.47
   5 -16  -8    8.13    1.57
   5  16   8    6.08    1.42
   6  16  -8    3.41    1.06
  -6 -16  -8    5.81    1.13
   6  16   8    7.29    1.44
   6 -16  -8    4.29    1.34
  -6  16  -8    3.29    1.18
   7  16  -8    0.67    1.20
   7  16   8   -1.08    1.21
   7 -16  -8    2.62    1.58
  -7  16  -8    1.04    1.16
   0  17   8    0.81    0.68
   0  17  -8   -0.50    0.50
   0  17  -8   -0.38    0.59
   0 -17  -8    0.71    0.64
  -1  17   8   10.55    1.23
   1  17  -8    9.40    1.05
  -1 -17  -8   12.12    1.47
   1  17  -8   10.20    1.24
  -1  17  -8   10.22    1.35
   1 -17  -8    7.42    1.28
  -1  17  -8    7.89    0.52
  -2 -17  -8   21.83    1.79
   2  17  -8   22.94    1.66
  -2  17   8   22.37    1.63
   2 -17  -8   20.92    2.54
  -2 -17   8   21.89    1.40
   2  17   8   18.84    1.76
  -2  17  -8   23.66    1.89
  -3 -17  -8    7.14    1.26
  -3  17   8    6.02    1.05
   3  17  -8    8.72    1.26
   3 -17  -8    8.22    1.50
   3  17   8    7.65    1.33
  -4 -17  -8    4.88    1.06
   4  17  -8    3.34    0.97
  -4  17  -8    2.45    0.92
   4  17   8    5.31    1.25
   4 -17  -8    3.84    1.11
  -5 -17  -8   11.37    1.46
   5  17  -8   10.78    1.69
   5 -17  -8    8.41    1.65
   5  17   8   10.55    1.67
  -5  17  -8    6.94    1.43
  -6 -17  -8    2.14    1.19
   6  17  -8    0.83    0.99
   6 -17  -8    0.07    0.98
  -6  17  -8    0.48    1.07
   6  17   8    1.61    1.08
   0  18   8    0.27    0.74
   0 -18  -8   -0.52    0.66
   0  18  -8    0.65    0.55
   0  18  -8    0.64    0.74
   1  18  -8   11.78    1.43
  -1  18   8   11.64    1.35
  -1 -18  -8   14.31    1.58
   1 -18  -8   15.51    1.72
  -1  18  -8   11.52    1.50
   1  18   8   13.57    1.55
  -2 -18  -8   20.33    1.74
   2  18  -8   17.01    1.54
  -2  18   8   21.01    1.60
  -2  18  -8   17.47    1.79
   2  18   8   20.02    1.77
  -2 -18   8   16.95    1.36
   2 -18  -8   16.48    1.98
  -3 -18  -8   19.36    1.80
   3  18  -8   19.91    1.77
   3 -18  -8   16.23    1.98
   3  18   8   17.07    1.84
  -3  18  -8   17.66    1.79
   4  18  -8   10.61    1.50
  -4 -18  -8    9.08    1.48
   4  18   8    9.38    1.58
   4 -18  -8   10.74    1.70
  -4  18  -8    6.97    1.54
   5  18  -8    7.82    1.51
  -5 -18  -8    8.85    1.50
   5  18   8    6.58    1.54
   5 -18  -8   10.60    1.81
  -5  18  -8    8.41    1.66
   6  18  -8    0.43    1.08
   6 -18  -8    0.23    1.28
  -6  18  -8    1.11    1.09
   0  19  -8    1.19    0.84
   0  19   8   -0.78    0.80
   0 -19  -8    0.56    0.83
   0  19  -8    0.47    0.69
  -1 -19  -8   11.08    1.68
  -1  19   8   12.06    1.45
   1  19  -8   15.70    1.58
   1  19  -8   12.84    1.31
   1  19   8   14.57    1.73
  -1  19  -8   15.21    1.70
   1 -19  -8   13.93    1.77
  -2  19   8   14.50    1.72
  -2 -19  -8   13.12    2.46
   2  19  -8   17.32    1.54
   2 -19  -8   15.66    1.85
  -2  19  -8   14.58    1.77
  -2 -19   8    9.87    1.39
   2  19   8   15.13    1.71
  -3 -19  -8   21.21    2.66
   3  19  -8   12.40    1.56
   3 -19  -8   14.53    2.04
   3  19   8   16.24    1.81
  -3  19  -8   13.94    1.85
   4  19  -8    7.71    1.42
  -4 -19  -8    9.34    1.80
  -4  19  -8   13.25    1.83
   4 -19  -8    9.38    1.85
   4  19   8    9.85    1.76
   5  19  -8    3.01    1.21
  -5 -19  -8    1.69    2.00
   5 -19  -8    4.34    1.55
   5  19   8    0.05    0.93
  -5  19  -8    4.00    1.25
   0 -20  -8    5.37    1.15
   0  20   8    4.33    1.16
   0  20  -8    4.97    1.32
  -1  20   8    3.46    1.07
   1  20  -8    3.48    0.97
  -1 -20  -8    2.37    1.10
  -1 -20   8    1.71    0.91
  -1  20  -8    0.37    0.90
   1 -20  -8    2.83    1.17
   1  20   8    7.09    1.49
  -2 -20  -8    2.72    1.20
   2  20  -8    4.08    1.08
   2 -20  -8    2.37    1.27
  -2  20  -8    1.55    1.01
  -2 -20   8    2.91    1.11
   2  20   8    2.63    1.07
  -3 -20  -8    6.35    1.47
   3  20  -8    6.29    1.84
   3 -20  -8    8.51    1.85
   3  20   8    6.51    1.54
  -3  20  -8    8.94    1.75
  -4 -20  -8    8.95    1.73
   4  20  -8    4.04    1.12
   4  20   8    5.47    1.52
  -4  20  -8    4.40    1.43
   4 -20  -8    2.38    2.28
   0  21  -8    6.21    1.64
   0 -21  -8    6.70    1.61
   0  21   8    3.56    1.24
  -1 -21  -8    2.44    1.16
  -1  21   8    3.33    1.28
  -1  21  -8    3.34    1.23
   1 -21  -8    1.29    1.20
  -1 -21   8    0.54    1.11
   1  21   8    3.60    1.24
   2  21  -8    1.36    1.23
  -2 -21  -8   -0.15    1.14
   2 -21  -8    2.47    1.04
   2  21   8   -0.23    1.01
  -2  21  -8    0.83    1.28
   3  21  -8    3.42    1.22
  -3 -21  -8    3.78    1.35
  -3  21  -8    5.24    1.49
   3  21   8    1.78    1.21
   3 -21  -8    2.83    3.07
   0 -22  -8   15.62    2.22
   0  22   8   11.40    2.37
  -1 -22  -8    1.36    1.22
   1  22   8    0.71    1.43
  -1  22  -8    5.39    1.49
  -1 -22   8    4.58    2.36
   1 -22  -8    4.17    1.50
   0   0  -9    0.84    0.28
   0   0   9    0.56    0.24
   0   0   9    0.71    0.29
   0   0  -9    0.64    0.28
   1   0   9   27.34    1.26
  -1   0   9   29.21    1.42
  -1   0  -9   29.20    1.30
   1   0  -9   27.82    1.35
   1   0  -9   30.46    1.24
  -1   0  -9   27.30    1.27
  -1   0   9   27.22    1.18
   1   0   9   28.67    1.36
  -2   0  -9   56.88    2.09
   2   0  -9   55.17    1.88
  -2   0  -9   52.70    2.02
   2   0   9   56.23    2.10
   3   0  -9   34.38    1.37
   3   0  -9   30.79    1.30
   3   0   9   36.63    1.60
  -3   0  -9   30.11    1.44
  -3   0  -9   33.54    1.56
   4   0   9  220.53    6.38
   4   0  -9  220.39    5.98
   4   0  -9  216.84    5.93
  -4   0  -9  224.58    6.42
  -5   0  -9    2.52    0.66
   5   0  -9    2.40    0.48
   5   0   9    2.76    0.60
   5   0  -9    2.66    0.47
  -6   0  -9    1.83    0.52
   6   0  -9    2.72    0.58
   6   0  -9    2.80    0.54
   6   0   9    3.40    0.73
  -7   0  -9    1.34    0.67
   7   0   9    2.71    0.71
   7   0  -9    2.47    0.65
   7   0  -9    1.83    0.71
   8   0  -9   18.80    1.26
   8   0  -9   15.85    1.64
   8   0   9   19.28    1.63
  -8   0  -9   20.37    1.65
   9   0  -9    1.14    0.72
   9   0   9    2.29    1.53
  -9   0  -9    2.45    0.94
   9   0  -9    3.20    1.06
  10   0  -9   12.76    1.96
  10   0   9   16.98    1.90
 -10   0  -9   14.67    1.88
   0   1  -9   25.12    1.12
   0  -1   9   23.11    1.07
   0   1   9   26.32    1.29
   0  -1   9   27.73    1.29
   0  -1  -9   20.77    1.15
   0  -1  -9   24.26    1.15
   1   1  -9   40.42    1.78
   1   1  -9   46.86    1.63
  -1   1   9   45.30    1.87
  -1  -1  -9   47.27    1.80
  -1  -1  -9   43.46    1.76
  -1   1   9   46.00    1.69
   1  -1   9   49.12    1.85
   1  -1   9   43.74    1.70
   1   1   9   39.57    1.62
   1  -1  -9   40.02    1.73
  -1   1  -9   42.94    1.89
  -1  -1   9   40.62    1.50
  -1  -1   9   43.15    1.80
   1   1   9   44.38    1.78
   1  -1  -9   41.99    1.61
  -1   1  -9   43.57    1.66
   2   1  -9   60.79    2.40
   2   1  -9   61.43    1.97
  -2  -1  -9   56.91    2.19
  -2   1   9   63.83    2.40
   2  -1   9   60.55    2.19
  -2  -1  -9   58.15    2.19
   2  -1  -9   54.81    2.20
   2  -1  -9   53.57    2.02
   2   1   9   60.01    2.20
  -2   1  -9   62.19    2.18
   2   1   9   52.64    2.09
  -2   1  -9   57.81    2.06
  -2  -1   9   57.72    1.88
   2  -1  -9   58.01    1.99
   3   1  -9  138.69    3.88
   3  -1   9  136.03    4.22
   3   1  -9  141.34    3.95
  -3  -1  -9  145.10    4.34
   3   1   9  141.18    4.33
   3  -1  -9  135.52    4.00
  -3   1  -9  142.62    4.32
  -3   1  -9  137.37    4.14
   3  -1  -9  140.49    4.36
   4  -1   9   46.45    1.93
  -4  -1  -9   41.61    1.92
   4   1  -9   40.96    1.51
   4   1  -9   40.09    1.52
   4  -1  -9   41.32    1.65
   4   1   9   41.95    1.92
  -4   1  -9   41.12    1.90
   4  -1  -9   37.76    1.62
   5   1  -9   12.35    0.75
   5  -1   9   12.85    1.05
  -5  -1  -9   13.02    1.70
   5   1  -9   12.51    0.76
   5   1   9   12.40    1.07
   5  -1  -9   11.56    0.84
  -5   1  -9   12.81    1.05
   5  -1  -9   12.30    0.90
   6   1  -9   12.59    0.81
   6  -1   9   11.27    1.28
  -6  -1  -9    9.59    1.03
   6  -1  -9   10.47    0.87
   6   1   9   10.34    1.08
  -6   1  -9    8.38    0.97
   7   1  -9    3.35    0.62
   7   1  -9    2.37    0.55
   7  -1   9    2.91    0.75
   7   1  -9    1.86    0.75
  -7  -1  -9    3.27    0.80
   7  -1  -9    1.84    0.70
   7   1   9    2.54    0.70
   7  -1  -9    2.12    0.62
  -7   1  -9    4.57    1.03
   8   1  -9    5.73    0.79
   8  -1   9    4.46    1.00
  -8  -1  -9    4.95    1.02
   8   1  -9    5.37    1.20
   8  -1  -9    4.57    1.14
   8  -1  -9    5.33    0.93
  -8   1  -9    5.26    1.06
   8   1   9    5.22    1.03
   9  -1   9    8.99    1.36
   9   1  -9    6.73    1.43
  -9  -1  -9    6.02    1.27
   9  -1  -9    8.08    1.41
  -9   1  -9    6.35    1.29
   9  -1  -9    8.90    1.20
   9   1   9   10.72    1.39
 -10  -1  -9    5.94    1.24
  10   1  -9    7.34    1.72
  10  -1   9    3.78    1.15
  10  -1  -9    6.24    1.44
 -10   1  -9    4.63    1.35
  10   1   9    9.31    1.63
   0  -2  -9   39.99    1.61
   0   2  -9   40.84    1.51
   0   2   9   41.15    1.72
   0  -2   9   41.18    1.66
   0   2   9   37.22    1.55
   0  -2   9   36.17    1.45
  -1   2   9    0.86    0.29
   1   2  -9    1.05    0.30
  -1  -2  -9    0.37    0.25
  -1  -2  -9    0.95    0.30
   1  -2   9    0.47    0.24
  -1   2   9    0.59    0.27
   1  -2   9    0.89    0.31
   1   2  -9    1.00    0.24
   1   2   9    0.34    0.26
  -1  -2   9    0.61    0.21
  -1  -2   9    0.84    0.29
   1  -2  -9    1.23    0.33
   1  -2  -9    0.64    0.28
  -1   2  -9    0.74    0.25
   1   2   9    1.41    0.36
  -1   2  -9    1.46    0.36
   2   2  -9  108.03    3.25
   2  -2   9  109.39    3.37
  -2  -2  -9  109.39    3.47
  -2  -2  -9  104.79    3.43
  -2   2   9  109.57    3.60
  -2   2  -9  103.14    3.21
   2   2   9  100.44    3.35
  -2  -2   9  103.96    2.94
   2  -2  -9   96.72    3.32
  -2   2  -9  104.64    3.29
   2  -2  -9  104.19    3.18
   2  -2  -9  103.83    3.26
  -3  -2  -9   66.95    2.43
   3  -2   9   59.82    2.25
   3   2  -9   63.73    1.99
   3   2  -9   62.54    1.95
  -3   2  -9   58.12    2.10
   3  -2  -9   59.20    2.11
  -3   2  -9   57.53    2.25
   3   2   9   57.42    2.30
   3  -2  -9   57.62    2.13
   4   2  -9   94.08    2.70
   4  -2   9   89.22    3.12
   4   2  -9   95.10    2.71
  -4  -2  -9   97.94    3.32
  -4   2  -9   82.92    3.14
  -4   2  -9   93.42    3.25
   4   2   9   86.86    3.20
   4  -2  -9   90.66    2.95
   4  -2  -9   87.40    2.96
   5   2  -9   10.20    0.62
   5  -2   9   13.50    1.00
  -5  -2  -9   12.10    1.06
   5  -2  -9    8.50    0.77
  -5   2  -9    8.46    0.94
   5   2   9    8.76    1.11
  -6  -2  -9    3.30    0.72
   6   2  -9    3.45    0.47
   6   2  -9    3.87    0.48
   6   2  -9    3.76    0.85
   6  -2   9    3.52    0.71
  -6   2  -9    2.56    0.76
   6  -2  -9    3.26    0.66
   6   2   9    3.36    0.78
   7   2  -9    8.03    0.66
   7   2  -9    6.50    1.16
  -7  -2  -9    9.14    1.04
   7  -2   9   10.76    1.11
   7   2  -9    8.20    0.67
   7   2   9    8.28    1.10
   7  -2  -9    8.04    0.94
  -7   2  -9    8.45    1.19
   7  -2  -9    6.85    1.06
   8   2  -9    1.82    0.49
   8   2  -9    1.65    1.14
   8  -2   9    3.82    1.00
  -8  -2  -9    2.67    0.82
   8  -2  -9    2.74    0.90
  -8   2  -9    2.98    0.85
   8   2   9    3.31    0.90
   8  -2  -9    2.06    0.73
   9  -2   9    2.60    0.87
   9   2  -9    3.22    0.99
  -9   2  -9    2.45    1.02
   9   2   9    1.73    0.86
   9  -2  -9    2.06    0.81
   9  -2  -9    2.74    0.87
 -10  -2  -9   14.61    1.92
  10  -2   9   16.15    1.91
  10   2  -9   18.95    2.20
  10   2   9   18.25    2.02
  10  -2  -9   18.15    2.09
 -10   2  -9   17.25    2.02
   0   3   9   50.92    2.03
   0  -3   9   51.27    1.94
   0  -3  -9   51.60    1.95
   0   3  -9   51.96    1.78
   0   3  -9   52.14    2.16
   0  -3   9   47.90    1.75
   0  -3  -9   48.28    1.93
   0   3   9   48.26    1.88
   1   3  -9    3.23    0.34
  -1  -3  -9    2.88    0.45
   1  -3   9    3.77    0.45
   1  -3   9    4.01    0.47
  -1  -3  -9    3.20    0.46
  -1   3   9    3.76    0.54
   1   3  -9    3.04    0.45
  -1   3   9    2.66    0.42
   1   3   9    2.68    0.41
  -1   3  -9    3.33    0.40
  -1   3  -9    2.11    0.39
   1  -3  -9    1.89    0.40
   1  -3  -9    2.79    0.44
   1   3   9    2.91    0.48
  -1  -3   9    2.93    0.34
  -2   3   9   55.92    2.22
   2  -3   9   54.01    1.98
   2   3  -9   52.45    1.69
  -2   3  -9   54.31    2.04
  -2  -3   9   51.60    1.67
   2   3   9   55.56    2.16
   2  -3  -9   55.17    2.00
  -2   3  -9   49.99    1.86
   2  -3  -9   54.64    2.05
   2  -3  -9   48.03    2.04
   3   3  -9   14.68    0.64
   3  -3   9   13.14    0.88
  -3  -3  -9   13.62    0.97
   3   3  -9   13.70    0.65
  -3   3  -9   14.90    1.00
  -3   3  -9   14.38    1.00
   3  -3  -9   13.83    0.91
   3  -3  -9   14.27    0.92
   3   3   9   14.43    1.06
   4  -3   9    0.82    0.33
   4   3  -9    0.41    0.19
   4   3  -9    0.49    0.18
  -4  -3  -9    0.57    0.32
  -4   3  -9    1.06    0.48
   4   3   9    0.47    0.35
  -4   3  -9   -0.17    0.28
   4  -3  -9    0.36    0.31
   5  -3   9   25.35    1.36
  -5  -3  -9   27.74    1.59
   5   3  -9   24.95    0.90
   5   3  -9   24.45    0.88
   5  -3  -9   22.75    1.33
  -5   3  -9   23.24    1.53
   5   3   9   25.51    1.59
   6   3  -9   22.49    0.85
   6   3  -9   22.66    0.83
   6  -3   9   24.15    1.45
  -6  -3  -9   21.34    1.49
   6   3  -9   23.60    1.72
   6   3   9   23.56    1.64
   6  -3  -9   23.19    1.42
  -6   3  -9   23.01    1.60
   7   3  -9    3.11    0.40
   7   3  -9    3.65    0.39
  -7  -3  -9    3.81    0.77
   7   3  -9    2.08    0.80
   7  -3   9    3.54    0.82
   7  -3  -9    4.15    0.93
   7   3   9    4.84    0.96
   7  -3  -9    2.67    0.73
  -7   3  -9    3.51    0.91
  -8  -3  -9    5.65    1.01
   8  -3   9    6.11    1.09
   8   3  -9    8.49    1.34
   8  -3  -9    3.56    1.01
   8  -3  -9    5.37    0.98
   8   3   9    6.38    1.12
  -8   3  -9    5.20    1.21
   9  -3   9    7.55    1.27
  -9  -3  -9    7.98    1.48
   9   3  -9    6.82    1.47
  -9   3  -9    8.61    1.47
   9  -3  -9    8.88    1.36
   9  -3  -9    7.98    1.26
   9   3   9    8.63    1.41
  10   3  -9    4.07    1.33
  10  -3   9    4.25    1.17
 -10  -3  -9    4.07    1.23
  10  -3  -9    3.42    1.21
  10   3   9    4.18    1.30
 -10   3  -9    1.64    1.12
   0   4  -9   53.33    2.18
   0   4   9   51.93    2.08
   0  -4   9   51.42    1.95
   0  -4  -9   48.84    1.95
   0   4   9   47.99    1.93
   0  -4   9   49.58    1.78
   0   4  -9   51.22    1.78
  -1  -4  -9   92.45    3.02
   1   4  -9   88.38    3.01
  -1  -4  -9   85.57    3.25
  -1   4   9   91.20    3.09
   1  -4   9   93.31    2.88
   1  -4   9   83.59    2.83
   1   4  -9   90.71    2.64
   1   4   9   89.43    3.02
   1  -4  -9   88.11    2.98
   1  -4  -9   89.16    2.91
   1   4   9   80.89    2.93
   1  -4  -9   82.08    2.87
  -1  -4   9   87.14    2.58
  -1   4  -9   88.24    2.80
  -1   4  -9   86.31    2.74
  -2  -4  -9   73.37    2.59
   2  -4   9   70.87    2.37
   2   4  -9   67.13    2.04
  -2   4   9   70.55    2.66
   2  -4  -9   66.69    2.54
  -2  -4   9   66.77    2.02
   2  -4  -9   69.68    2.79
  -2   4  -9   67.48    2.45
   2  -4  -9   71.25    2.49
   2   4   9   71.09    2.61
  -2   4  -9   67.83    2.25
   3   4  -9   12.54    0.57
   3   4  -9   13.20    0.53
  -3  -4  -9   12.37    0.93
  -3   4   9   10.70    0.95
   3  -4   9   12.04    0.81
   3  -4  -9   10.91    0.85
  -3   4  -9   11.51    0.91
   3   4   9   12.16    0.98
  -3   4  -9   12.58    0.76
   4  -4   9    2.25    0.46
  -4  -4  -9    2.80    0.69
   4  -4  -9    2.44    0.51
  -4   4  -9    2.78    0.52
   4   4   9    2.46    0.64
  -4   4  -9    2.55    0.56
[truncated: 381,822 more chars]
